# Supplementary material for: Enantioselective synthesis of α-aminoboronates by NiH-catalysed asymmetric hydroamidation of alkenyl boronates
Source: PubMed Central journal article supplement (PMC9512809; doi:10.1038/s41467-022-33411-9), 2022-09-26
Supplement: 41467_2022_33411_MOESM1_ESM.pdf [file 41467_2022_33411_MOESM1_ESM.pdf]

## Supplementary Information

### **Enantioselective synthesis of $\alpha$ -aminoboronates by NiH-catalysed asymmetric hydroamidation of alkenyl boronates**

Yao Zhang<sup>1</sup>, Deyong Qiao<sup>1</sup>, Mei Duan<sup>1</sup>, You Wang<sup>1,\*</sup>, and Shaolin Zhu<sup>1,2,\*</sup>

*<sup>1</sup>State Key Laboratory of Coordination Chemistry, Jiangsu Key Laboratory of Advanced Organic Materials, Chemistry and Biomedicine Innovation Center (ChemBIC), School of Chemistry and Chemical Engineering, Nanjing University, Nanjing, 210093, China*

*<sup>2</sup>School of Chemistry and Chemical Engineering, Henan Normal University, Xinxiang, 453007, China*

\*email: wangyou@nju.edu.cn; shaolinzhu@nju.edu.cn

## I. Supplementary Methods

### 1. General Information

Solvents were either purified and dried by passage through alumina and Q5 reactant-packed columns on a solvent purification system or bought from the commercial sources and transferred to the glovebox without exposure to air. Other commercial reagents were purchased from Sigma-Aldrich, Acros, Alfa Aesar, TCI, Aladdin, J&K, Energy Chemical, Bide Pharmatech Ltd. and were used as received. Deionized water was used after degassing. Flash chromatography was performed using glass columns with silica gel (*SiliaFlash*<sup>®</sup> P60, particle size 40-63  $\mu\text{m}$ , Silicycle).

$\text{NiCl}_2 \cdot 6\text{H}_2\text{O}$  (CAS 7791-20-0, nickel(II) chloride hexahydrate, *ReagentPlus*<sup>®</sup>) was purchased from Sigma-Aldrich and stored under nitrogen in glovebox;

$(\text{EtO})_3\text{SiH}$  (CAS 2031-62-1, triethoxysilane) was purchased from TCI and stored under nitrogen at  $-20\text{ }^\circ\text{C}$  in glove box;

$\text{LiI}$  (CAS 10377-51-2) was purchased from Aladdin or Energy Chemical (99.9% metals basis) and stored under nitrogen in glovebox;

$\text{DMA}$  (CAS 127-19-5, *N,N*-dimethylacetamide) was purchased from Acros (99.5%, Extra Dry, *AcroSeal*<sup>®</sup>) and stored under nitrogen in glovebox.

**Safety note:** MSDS indicates that  $(\text{EtO})_3\text{SiH}$  is a corrosive and flammable liquid. According to the literatures<sup>1</sup>, it may form pyrophoric gas (possibly  $\text{SiH}_4$ ) during the storage or reaction. Although during our reactions, we used  $(\text{EtO})_3\text{SiH}$  without incident and  $\text{SiH}_4$  was not observed, we urge the users of these procedures to be alert to the possibility of  $\text{SiH}_4$  formation and possible exotherms and to take suitable precautions (suitable eye protection is also required).  $(\text{MeO})_2\text{MeSiH}$  could be an alternative hydride source in case of safety consideration.

#### General analytical information.

All compounds (starting materials and products) were characterized by  $^1\text{H}$  NMR,  $^{13}\text{C}$  NMR, IR spectroscopy and high-resolution mass spectrometry.  $^1\text{H}$  NMR spectra were recorded on Bruker 500 MHz spectrometer and are referenced relative to residual

$\text{CDCl}_3$  proton signals at  $\delta$  7.26 ppm.  $^{19}\text{F}$  NMR spectra were recorded on a Bruker 500 MHz spectrometer and are referenced to  $\text{CFCl}_3$  ( $\delta$  0.0 ppm). Data for  $^1\text{H}$  and  $^{19}\text{F}$  NMR are reported as follows: chemical shift ( $\delta$  ppm), multiplicity (s = singlet, d = doublet, t = triplet, q = quartet, m = multiplet, br = broad), integration, and coupling constant (Hz).  $^{13}\text{C}$  NMR spectra were recorded on a Bruker 500 MHz spectrometer and are referenced to  $\text{CDCl}_3$  at  $\delta$  77.16 ppm. The  $^{13}\text{C}$  NMR spectra were obtained with  $^1\text{H}$  decoupling. Data for  $^{13}\text{C}$  NMR are reported in terms of chemical shift and multiplicity where appropriate.  $^{11}\text{B}$  NMR spectra were recorded on a Bruker 500 MHz spectrometer and are referenced to  $\text{BF}_3 \cdot \text{Et}_2\text{O}$  ( $\delta$  0.0 ppm), and the broad peaks around -3 ppm were ascribed to NMR tubes. IR spectra were obtained on a Bruker Alpha or Thermo Scientific Nicolet iS10 FT-IR and was reported in terms of frequency of absorption ( $\text{cm}^{-1}$ ). GC analyses were performed on Agilent 7890 or 8890 gas chromatograph with an FID detector using a J&W DB-1 column (10 m, 0.1 mm I.D.). Low Resolution Mass spectra were obtained from on an Agilent 5977A GC-MS. High Resolution Mass spectra were obtained on a Thermo Fisher Q Exactive instrument (ESI). Melting points (m.p.) were obtained on a Mel-Temp capillary melting point apparatus. High pressure liquid chromatography (HPLC) was performed on Agilent 1260 Series chromatographs using Daicel Chiralcel & Chiralpak columns (250 mm). Optical rotations were measured on a Rudolph Research Analytical Autopol VI automatic polarimeter using a 50 mm pathlength cell at 589 nm with  $[\alpha]_{\text{D}}$  values reported in degrees; concentration (c) is in g/100 mL.

Medium-sized screw-cap test tubes (8 mL) were used for all 0.20 mmol scale reactions: Fisher 13 x 100 mm tubes (Cat. No. 14-959-35C)

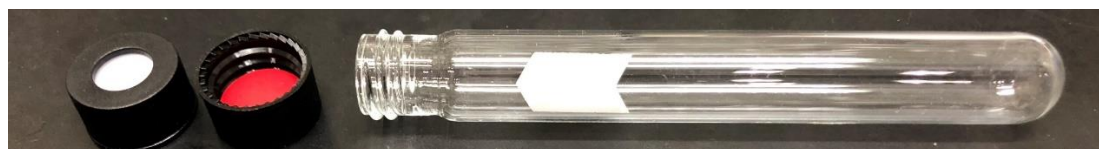

Cap with Septa: Thermo Scientific ASM PHN CAP w/PTFE/SIL (Cat. No. 03378316)

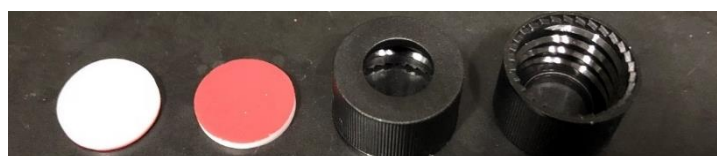

## 2. NiH-Catalyzed Asymmetric Hydroamidation of Alkenyl Boronates

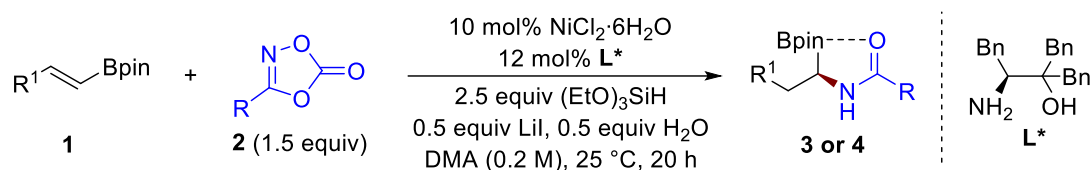

### General procedure A for NiH-catalyzed asymmetric hydroamidation of alkenyl

**boronates.** In a nitrogen-filled glove box, to an oven-dried 8 mL screw-cap vial equipped with a magnetic stir bar was added NiCl<sub>2</sub>·6H<sub>2</sub>O (4.8 mg, 10 mol%), L\* (8.0 mg, 12 mol%), LiI (13.4 mg, 0.10 mmol, 0.50 equiv), 1,4,2-dioxazol-5-one (0.30 mmol, 1.5 equiv) (if the olefin is a solid, it was also added at this time) and anhydrous DMA (1.0 mL, 0.20 M). The mixture was stirred for 10 min at room temperature, at which time alkenyl boronate (0.20 mmol, 1.0 equiv) (if the 1,4,2-dioxazol-5-one is a liquid, it was added at this time), H<sub>2</sub>O (1.8 μL, 0.10 mmol, 0.50 equiv) and (EtO)<sub>3</sub>SiH (92 μL, 0.50 mmol, 2.5 equiv) were added to the resulting mixture in this order. The tube was sealed with a teflon-lined screw cap, removed from the glove box and the reaction was stirred at 25 °C water bath for up to 20 h (the mixture was stirred at 800 rpm). After the reaction was complete, the reaction was quenched upon the addition of H<sub>2</sub>O, and the mixture was extracted with Et<sub>2</sub>O. The organic layer was concentrated to give the crude product. *n*-Dodecane (20 μL) was added as an internal standard for GC analysis. The product was purified by flash column chromatography (petroleum ether/EtOAc) for each substrate. The yields reported are the average of at least two experiments, unless otherwise indicated. The enantiomeric excesses (% *ee*) were determined by HPLC analysis using chiral stationary phases.

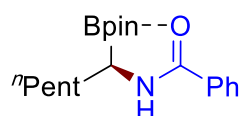

(*R*)-*N*-(1-(4,4,5,5-Tetramethyl-1,3,2-dioxaborolan-2-yl)hexyl)benzamide (Figure 3, **3a**). From (*E*)-2-(hex-1-en-1-yl)-4,4,5,5-tetramethyl-1,3,2-dioxaborolane (**1a**) (42.0 mg, 0.20 mmol, 1.0 equiv) and 3-phenyl-1,4,2-dioxazol-5-one (**2a**) (48.9 mg, 0.30 mmol, 1.5 equiv), the title compound was prepared following the general procedure **A**



using NiCl<sub>2</sub>·6H<sub>2</sub>O (4.8 mg, 10 mol%), **L\*** (8.0 mg, 12 mol%), LiI (13.4 mg, 0.10 mmol, 0.50 equiv), H<sub>2</sub>O (1.8 μL, 0.10 mmol, 0.50 equiv), (EtO)<sub>3</sub>SiH (92 μL, 0.50 mmol, 2.5 equiv), anhydrous DMA (1.0 mL). The reaction mixture was stirred for 20 h at 25 °C. The crude material was purified by flash column chromatography (petroleum ether/EtOAc = 2:1) to provide the title compound as a white solid in 71% yield (46.8 mg).

<sup>1</sup>H NMR (500 MHz, CDCl<sub>3</sub>) δ 8.47 (s, 1H), 7.80 (d, *J* = 7.4 Hz, 2H), 7.45 (t, *J* = 7.4 Hz, 1H), 7.32 (t, *J* = 7.7 Hz, 2H), 2.79 (t, *J* = 6.3 Hz, 1H), 1.75 – 1.65 (m, 1H), 1.61 – 1.52 (m, 1H), 1.49 – 1.37 (m, 2H), 1.34 – 1.28 (m, 4H), 1.26 (s, 12H), 0.88 (t, *J* = 7.0 Hz, 3H);

<sup>13</sup>C NMR (126 MHz, CDCl<sub>3</sub>) δ 170.8, 133.1, 128.6, 128.2, 128.1, 81.2, 32.1, 31.3, 27.7, 25.4, 25.2, 22.7, 14.2;

<sup>11</sup>B NMR (160 MHz, CDCl<sub>3</sub>) δ 17.8;

HRMS (ESI) calcd. for C<sub>19</sub>H<sub>30</sub>BNNaO<sub>3</sub> [M+Na]<sup>+</sup> *m/z* 354.2211, found 354.2202;

IR (neat, cm<sup>-1</sup>) 3079, 2925, 1608, 1530, 1127, 1099, 709;

**m.p.** 130 – 132 °C;

[α]<sub>D</sub><sup>25</sup> = -35.8 (c = 1.06, CHCl<sub>3</sub>);

**HPLC analysis:** the *ee* (95%) was determined using a CHIRALPAK<sup>®</sup> IE-3 column, 5% EtOH in hexane, 1.0 mL/min, 240 nm UV detector, *t*<sub>R</sub> (major) = 6.8 min, *t*<sub>R</sub> (minor) = 7.4 min.

From (*Z*)-**1a** (Figure 2, entry 15): (*Z*)-2-(hex-1-en-1-yl)-4,4,5,5-tetramethyl-1,3,2-dioxaborolane ((*Z*)-**1a**) (42.0 mg, 0.20 mmol, 1.0 equiv) and 3-phenyl-1,4,2-dioxazol-5-one (**2a**) (48.9 mg, 0.30 mmol, 1.5 equiv) were used. The title compound was prepared following the general procedure A. The crude material was purified by flash column chromatography (petroleum ether/EtOAc = 2:1) to provide the title compound as a white solid in 64% yield (42.6 mg).

**HPLC analysis:** the *ee* (85%) was determined using a CHIRALPAK<sup>®</sup> IE-3 column, 5% EtOH in hexane, 1.0 mL/min, 240 nm UV detector, *t*<sub>R</sub> (major) = 6.9 min, *t*<sub>R</sub> (minor) =

7.5 min.

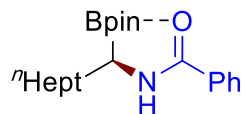

**(R)-N-(1-(4,4,5,5-Tetramethyl-1,3,2-dioxaborolan-2-yl)octyl)benzamide** (Figure 3, **3b**). From (*E*)-4,4,5,5-tetramethyl-2-(oct-1-en-1-yl)-1,3,2-dioxaborolane (**1b**) (47.6 mg, 0.20 mmol, 1.0 equiv) and 3-phenyl-1,4,2-dioxazol-5-one (**2a**) (48.9 mg, 0.30 mmol, 1.5 equiv), the title compound was prepared following the general procedure **A** using NiCl<sub>2</sub>·6H<sub>2</sub>O (4.8 mg, 10 mol%), **L\*** (8.0 mg, 12 mol%), LiI (13.4 mg, 0.10 mmol, 0.50 equiv), H<sub>2</sub>O (1.8 μL, 0.10 mmol, 0.50 equiv), (EtO)<sub>3</sub>SiH (92 μL, 0.50 mmol, 2.5 equiv), anhydrous DMA (1.0 mL). The reaction mixture was stirred for 20 h at 25 °C. The crude material was purified by flash column chromatography (petroleum ether/EtOAc = 2:1) to provide the title compound as a colorless oil in 73% yield (52.5 mg).

<sup>1</sup>H NMR (500 MHz, CDCl<sub>3</sub>) δ 8.16 (s, 1H), 7.80 (d, *J* = 7.2 Hz, 2H), 7.47 (t, *J* = 7.5 Hz, 1H), 7.34 (t, *J* = 7.8 Hz, 2H), 2.86 – 2.77 (m, 1H), 1.74 – 1.66 (m, 1H), 1.60 – 1.53 (m, 1H), 1.47 – 1.35 (m, 2H), 1.33 – 1.20 (m, 20H), 0.88 (t, *J* = 6.9 Hz, 3H);

<sup>13</sup>C NMR (126 MHz, CDCl<sub>3</sub>) δ 170.9, 133.1, 128.6, 128.2, 81.2, 32.0, 31.4, 29.9, 29.4, 28.0, 25.4, 25.3, 22.8, 14.3;

<sup>11</sup>B NMR (160 MHz, CDCl<sub>3</sub>) δ 18.3;

HRMS (ESI) calcd. for C<sub>21</sub>H<sub>35</sub>BNO<sub>3</sub> [M+H]<sup>+</sup> *m/z* 360.2705, found 360.2699;

IR (neat, cm<sup>-1</sup>) 3196, 2925, 2855, 1610, 1112, 705;

[α]<sub>D</sub><sup>25</sup> = -36.4 (c = 1.10, CHCl<sub>3</sub>);

**HPLC analysis:** the *ee* (95%) was determined using a CHIRALCEL<sup>®</sup> OD-H column, 8% *i*PrOH in hexane, 0.5 mL/min, 254 nm UV detector, *t*<sub>R</sub> (minor) = 7.3 min, *t*<sub>R</sub> (major) = 8.0 min.

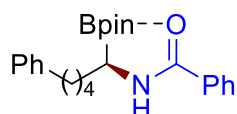

**(R)-N-(5-Phenyl-1-(4,4,5,5-tetramethyl-1,3,2-dioxaborolan-2-yl)pentyl)**

**benzamide** (Figure 3, **3c**). From (*E*)-4,4,5,5-tetramethyl-2-(5-phenylpent-1-en-1-yl)-1,3,2-dioxaborolane (**1c**) (54.4 mg, 0.20 mmol, 1.0 equiv) and 3-phenyl-1,4,2-dioxazol-5-one (**2a**) (48.9 mg, 0.30 mmol, 1.5 equiv), the title compound was prepared following the general procedure **A** using NiCl<sub>2</sub>·6H<sub>2</sub>O (4.8 mg, 10 mol%), **L\*** (8.0 mg, 12 mol%), LiI (13.4 mg, 0.10 mmol, 0.50 equiv), H<sub>2</sub>O (1.8 μL, 0.10 mmol, 0.50 equiv), (EtO)<sub>3</sub>SiH (92 μL, 0.50 mmol, 2.5 equiv), anhydrous DMA (1.0 mL). The reaction mixture was stirred for 20 h at 25 °C. The crude material was purified by flash column chromatography (petroleum ether/EtOAc = 2:1) to provide the title compound as a colorless oil in 56% yield (44.2 mg).

<sup>1</sup>H NMR (500 MHz, CDCl<sub>3</sub>) δ 7.97 (s, 1H), 7.78 (d, *J* = 7.4 Hz, 2H), 7.49 (t, *J* = 7.5 Hz, 1H), 7.35 (t, *J* = 7.8 Hz, 2H), 7.26 (t, *J* = 7.5 Hz, 2H), 7.20 – 7.14 (m, 3H), 2.87 – 2.78 (m, 1H), 2.69 – 2.55 (m, 2H), 1.78 – 1.69 (m, 1H), 1.69 – 1.57 (m, 3H), 1.51 – 1.40 (m, 2H), 1.25 (s, 12H);

<sup>13</sup>C NMR (126 MHz, CDCl<sub>3</sub>) δ 171.0, 142.8, 133.2, 128.7, 128.6, 128.4, 128.2, 125.7, 81.3, 35.9, 31.6, 31.2, 27.5, 25.4, 25.3;

<sup>11</sup>B NMR (160 MHz, CDCl<sub>3</sub>) δ 18.2;

HRMS (ESI) calcd. for C<sub>24</sub>H<sub>32</sub>BNNaO<sub>3</sub> [M+Na]<sup>+</sup> *m/z* 416.2367, found 416.2358;

IR (neat, cm<sup>-1</sup>) 3193, 2970, 2927, 1610, 1576, 1113, 698, 580;

[α]<sub>D</sub><sup>25</sup> = -32.4 (c = 0.89, CHCl<sub>3</sub>);

**HPLC analysis:** the *ee* (96%) was determined using a CHIRALPAK<sup>®</sup> IE-3 column, 10% EtOH in hexane, 0.8 mL/min, 240 nm UV detector, *t*<sub>R</sub> (major) = 7.4 min, *t*<sub>R</sub> (minor) = 7.8 min.

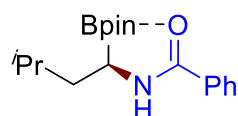

**(*R*)-*N*-(3-Methyl-1-(4,4,5,5-tetramethyl-1,3,2-dioxaborolan-2-yl)butyl)benzamide** (Figure 3, **3d**). From (*E*)-4,4,5,5-tetramethyl-2-(3-methylbut-1-en-1-yl)-1,3,2-dioxaborolane (**1d**) (39.2 mg, 0.20 mmol, 1.0 equiv) and 3-phenyl-1,4,2-dioxazol-5-one (**2a**) (48.9 mg, 0.30 mmol, 1.5 equiv), the title compound was prepared following

the general procedure **A** using NiCl<sub>2</sub>·6H<sub>2</sub>O (4.8 mg, 10 mol%), **L**\* (8.0 mg, 12 mol%), LiI (13.4 mg, 0.10 mmol, 0.50 equiv), H<sub>2</sub>O (1.8 μL, 0.10 mmol, 0.50 equiv), (EtO)<sub>3</sub>SiH (92 μL, 0.50 mmol, 2.5 equiv), anhydrous DMA (1.0 mL). The reaction mixture was stirred for 20 h at 25 °C. The crude material was purified by flash column chromatography (petroleum ether/EtOAc = 2:1) to provide the title compound as a white solid in 68% yield (43.0 mg).

<sup>1</sup>H NMR (500 MHz, CDCl<sub>3</sub>) δ 7.77 (d, *J* = 7.4 Hz, 2H), 7.64 (s, 1H), 7.50 (t, *J* = 7.4 Hz, 1H), 7.38 (t, *J* = 7.7 Hz, 2H), 2.95 (t, *J* = 6.8 Hz, 1H), 1.79 – 1.67 (m, 1H), 1.53 – 1.47 (m, 2H), 1.27 (s, 12H), 0.96 (d, *J* = 6.5 Hz, 6H);

<sup>13</sup>C NMR (126 MHz, CDCl<sub>3</sub>) δ 170.9, 133.1, 128.7, 128.4, 128.0, 81.2, 40.6, 26.3, 25.3, 25.3, 23.6, 22.2;

<sup>11</sup>B NMR (160 MHz, CDCl<sub>3</sub>) δ 18.6;

HRMS (ESI) calcd. for C<sub>18</sub>H<sub>29</sub>BNO<sub>3</sub> [M+H]<sup>+</sup> *m/z* 318.2235, found 318.2231;

IR (neat, cm<sup>-1</sup>) 2958, 1609, 1528, 1113, 1098, 707;

[α]<sub>D</sub><sup>25</sup> = -37.3 (c = 0.96, CHCl<sub>3</sub>);

**HPLC analysis:** the *ee* (92%) was determined using a CHIRALPAK<sup>®</sup> AD-H column, 5% *i*PrOH in hexane, 1.0 mL/min, 240 nm UV detector, *t*<sub>R</sub> (minor) = 4.8 min, *t*<sub>R</sub> (major) = 5.5 min.

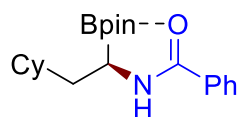

**(R)-N-(2-Cyclohexyl-1-(4,4,5,5-tetramethyl-1,3,2-dioxaborolan-2-yl)ethyl)benzamide** (Figure 3, **3e**). From (*E*)-2-(2-cyclohexylvinyl)-4,4,5,5-tetramethyl-1,3,2-dioxaborolane (**1e**) (47.2 mg, 0.20 mmol, 1.0 equiv) and 3-phenyl-1,4,2-dioxazol-5-one (**2a**) (48.9 mg, 0.30 mmol, 1.5 equiv), the title compound was prepared following the general procedure **A** using NiCl<sub>2</sub>·6H<sub>2</sub>O (4.8 mg, 10 mol%), **L**\* (8.0 mg, 12 mol%), LiI (13.4 mg, 0.10 mmol, 0.50 equiv), H<sub>2</sub>O (1.8 μL, 0.10 mmol, 0.50 equiv), (EtO)<sub>3</sub>SiH (92 μL, 0.50 mmol, 2.5 equiv), anhydrous DMA (1.0 mL). The reaction mixture was stirred for 20 h at 25 °C. The crude material was purified by flash

column chromatography (petroleum ether/EtOAc = 2:1) to provide the title compound as a colorless oil in 70% yield (50.0 mg).

$^1\text{H NMR}$  (500 MHz,  $\text{CDCl}_3$ )  $\delta$  7.82 – 7.76 (m, 2H), 7.71 (s, 1H), 7.50 (t,  $J = 7.5$  Hz, 1H), 7.38 (t,  $J = 7.8$  Hz, 2H), 3.00 – 2.92 (m, 1H), 1.91 – 1.81 (m, 1H), 1.76 – 1.63 (m, 4H), 1.60 – 1.51 (m, 1H), 1.51 – 1.45 (m, 1H), 1.43 – 1.36 (m, 1H), 1.27 (s, 12H), 1.22 – 1.11 (m, 3H), 1.01 – 0.84 (m, 2H);

$^{13}\text{C NMR}$  (126 MHz,  $\text{CDCl}_3$ )  $\delta$  170.8, 133.2, 128.7, 128.3, 128.1, 81.2, 39.1, 35.8, 34.2, 33.0, 26.8, 26.5, 26.5, 25.3, 25.3;

$^{11}\text{B NMR}$  (160 MHz,  $\text{CDCl}_3$ )  $\delta$  18.6;

**HRMS** (ESI) calcd. for  $\text{C}_{21}\text{H}_{33}\text{BNO}_3$   $[\text{M}+\text{H}]^+$   $m/z$  358.2548, found 358.2541;

**IR** (neat,  $\text{cm}^{-1}$ ) 3066, 2921, 1611, 1122, 705;

$[\alpha]_{\text{D}}^{25} = -41.2$  ( $c = 1.08$ ,  $\text{CHCl}_3$ );

**HPLC analysis:** the *ee* (93%) was determined using a CHIRALPAK<sup>®</sup> AD-H column, 5% *i*PrOH in hexane, 1.0 mL/min, 254 nm UV detector,  $t_{\text{R}}$  (minor) = 6.0 min,  $t_{\text{R}}$  (major) = 6.8 min.

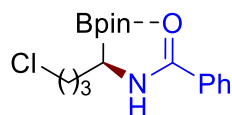

**(R)-N-(4-chloro-1-(4,4,5,5-tetramethyl-1,3,2-dioxaborolan-2-yl)butyl)benzamide**

(Figure 3, **3f**). From (*E*)-2-(4-chlorobut-1-en-1-yl)-4,4,5,5-tetramethyl-1,3,2-dioxaborolane (**1f**) (43.3 mg, 0.20 mmol, 1.0 equiv) and 3-phenyl-1,4,2-dioxazol-5-one (**2a**) (48.9 mg, 0.30 mmol, 1.5 equiv), the title compound was prepared following the general procedure **A** using  $\text{NiCl}_2 \cdot 6\text{H}_2\text{O}$  (4.8 mg, 10 mol%), **L\*** (8.0 mg, 12 mol%), LiI (13.4 mg, 0.10 mmol, 0.50 equiv),  $\text{H}_2\text{O}$  (1.8  $\mu\text{L}$ , 0.10 mmol, 0.50 equiv),  $(\text{EtO})_3\text{SiH}$  (92  $\mu\text{L}$ , 0.50 mmol, 2.5 equiv), anhydrous DMA (1.0 mL). The reaction mixture was stirred for 20 h at 25 °C. The crude material was purified by flash column chromatography (petroleum ether/EtOAc = 3:2) to provide the title compound as a white solid in 59% yield (37.9 mg).

$^1\text{H NMR}$  (500 MHz,  $\text{CDCl}_3$ )  $\delta$  8.86 (s, 1H), 7.80 (d,  $J = 7.4$  Hz, 2H), 7.46 (t,  $J = 7.5$

Hz, 1H), 7.32 (t,  $J = 7.7$  Hz, 2H), 3.60 – 3.49 (m, 2H), 2.79 (t,  $J = 6.5$  Hz, 1H), 2.02 – 1.88 (m, 2H), 1.86 – 1.77 (m, 1H), 1.77 – 1.68 (m, 1H), 1.27 (s, 12H);

$^{13}\text{C}$  NMR (126 MHz,  $\text{CDCl}_3$ )  $\delta$  171.3, 133.5, 128.7, 128.4, 127.2, 81.3, 45.3, 30.7, 28.9, 25.4, 25.3;

$^{11}\text{B}$  NMR (160 MHz,  $\text{CDCl}_3$ )  $\delta$  16.7;

HRMS (ESI) calcd. for  $\text{C}_{17}\text{H}_{26}\text{BClNO}_3$   $[\text{M}+\text{H}]^+$   $m/z$  338.1689, found 338.1682;

IR (neat,  $\text{cm}^{-1}$ ) 3078, 2966, 1603, 1569, 1532, 1109, 712;

m.p. 53 – 55 °C;

$[\alpha]_D^{25} = -53.3$  ( $c = 0.51$ ,  $\text{CHCl}_3$ );

**HPLC analysis:** the *ee* (95%) was determined using a CHIRALPAK® ID-3 column, 5% EtOH in hexane, 1.0 mL/min, 240 nm UV detector,  $t_R$  (major) = 5.1 min,  $t_R$  (minor) = 5.5 min.

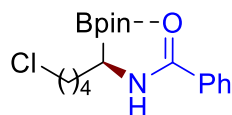

**(R)-N-(5-Chloro-1-(4,4,5,5-tetramethyl-1,3,2-dioxaborolan-2-yl)pentyl)benzamide** (Figure 3, **3g**). From (*E*)-2-(5-chloropent-1-en-1-yl)-4,4,5,5-tetramethyl-1,3,2-dioxaborolane (**1g**) (46.1 mg, 0.20 mmol, 1.0 equiv) and 3-phenyl-1,4,2-dioxazol-5-one (**2a**) (48.9 mg, 0.30 mmol, 1.5 equiv), the title compound was prepared following the general procedure A using  $\text{NiCl}_2 \cdot 6\text{H}_2\text{O}$  (4.8 mg, 10 mol%), **L\*** (8.0 mg, 12 mol%), LiI (13.4 mg, 0.10 mmol, 0.50 equiv),  $\text{H}_2\text{O}$  (1.8  $\mu\text{L}$ , 0.10 mmol, 0.50 equiv),  $(\text{EtO})_3\text{SiH}$  (92  $\mu\text{L}$ , 0.50 mmol, 2.5 equiv), anhydrous DMA (1.0 mL). The reaction mixture was stirred for 20 h at 25 °C. The crude material was purified by flash column chromatography (petroleum ether/EtOAc = 3:2) to provide the title compound as a colorless oil in 55% yield (38.4 mg).

$^1\text{H}$  NMR (500 MHz,  $\text{CDCl}_3$ )  $\delta$  8.52 (s, 1H), 7.80 (d,  $J = 7.3$  Hz, 2H), 7.47 (t,  $J = 7.5$  Hz, 1H), 7.34 (t,  $J = 7.8$  Hz, 2H), 3.59 – 3.48 (m, 2H), 2.83 – 2.75 (m, 1H), 1.83 – 1.74 (m, 2H), 1.74 – 1.66 (s, 1H), 1.64 – 1.51 (m, 3H), 1.26 (s, 12H);

$^{13}\text{C}$  NMR (126 MHz,  $\text{CDCl}_3$ )  $\delta$  171.1, 133.3, 128.7, 128.3, 127.7, 81.2, 45.2, 32.8, 30.7,

25.5, 25.3, 25.1;

**<sup>11</sup>B NMR** (160 MHz, CDCl<sub>3</sub>) δ 17.6;

**HRMS** (ESI) calcd. for C<sub>18</sub>H<sub>27</sub>BCINNaO<sub>3</sub> [M+Na]<sup>+</sup> m/z 374.1665, found 374.1656;

**IR** (neat, cm<sup>-1</sup>) 3193, 2971, 2929, 1610, 1576, 1111, 734;

[α]<sub>D</sub><sup>25</sup> = -40.0 (c = 1.08, CHCl<sub>3</sub>);

**HPLC analysis:** the *ee* (96%) was determined using a CHIRALPAK<sup>®</sup> AD-H column, 5% *i*PrOH in hexane, 1.0 mL/min, 240 nm UV detector, *t*<sub>R</sub> (minor) = 7.9 min, *t*<sub>R</sub> (major) = 9.2 min.

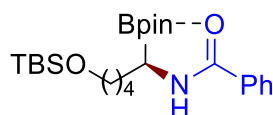

**(*R*)-*N*-(5-((*tert*-Butyldimethylsilyloxy)-1-(4,4,5,5-tetramethyl-1,3,2-dioxaborolan-2-yl)pentyl)benzamide** (Figure 3, **3h**). From (*E*)-*tert*-butyldimethyl((5-(4,4,5,5-tetramethyl-1,3,2-dioxaborolan-2-yl)pent-4-en-1-yl)oxy)silane (**1h**) (65.3 mg, 0.20 mmol, 1.0 equiv) and 3-phenyl-1,4,2-dioxazol-5-one (**2a**) (48.9 mg, 0.30 mmol, 1.5 equiv), the title compound was prepared following the general procedure **A** using NiCl<sub>2</sub>·6H<sub>2</sub>O (4.8 mg, 10 mol%), **L\*** (8.0 mg, 12 mol%), LiI (13.4 mg, 0.10 mmol, 0.50 equiv), H<sub>2</sub>O (1.8 μL, 0.10 mmol, 0.50 equiv), (EtO)<sub>3</sub>SiH (92 μL, 0.50 mmol, 2.5 equiv), anhydrous DMA (1.0 mL). The reaction mixture was stirred for 20 h at 25 °C. The crude material was purified by flash column chromatography (petroleum ether/EtOAc = 2:1) to provide the title compound as a colorless oil in 76% yield (68.2 mg).

**<sup>1</sup>H NMR** (500 MHz, CDCl<sub>3</sub>) δ 7.82 – 7.77 (m, 2H), 7.68 (s, 1H), 7.53 (t, *J* = 7.5 Hz, 1H), 7.41 (t, *J* = 7.8 Hz, 2H), 3.64 (t, *J* = 6.2 Hz, 2H), 2.92 – 2.83 (m, 1H), 1.78 – 1.67 (m, 1H), 1.68 – 1.44 (m, 5H), 1.27 (s, 6H), 1.26 (s, 6H), 0.88 (s, 9H), 0.04 (s, 6H);

**<sup>13</sup>C NMR** (126 MHz, CDCl<sub>3</sub>) δ 170.9, 133.2, 128.8, 128.5, 128.0, 81.3, 63.3, 32.9, 31.0, 26.2, 25.4, 25.2, 24.2, 18.5, -5.1;

**<sup>11</sup>B NMR** (160 MHz, CDCl<sub>3</sub>) δ 18.9;

**HRMS** (ESI) calcd. for C<sub>24</sub>H<sub>42</sub>BNNaO<sub>4</sub>Si [M+Na]<sup>+</sup> m/z 470.2868, found 470.2858;

**IR** (neat, cm<sup>-1</sup>) 3070, 2928, 2857, 1611, 1096, 706;

$[\alpha]_D^{25} = -41.6$  ( $c = 0.98$ ,  $\text{CHCl}_3$ );

**HPLC analysis:** the *ee* (95%) was determined using a CHIRALPAK<sup>®</sup> IG-3 column, 5% EtOH in hexane, 0.8 mL/min, 240 nm UV detector,  $t_R$  (major) = 4.9 min,  $t_R$  (minor) = 5.7 min.

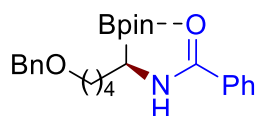

**(R)-N-(5-(Benzyloxy)-1-(4,4,5,5-tetramethyl-1,3,2-dioxaborolan-2-**

**yl)pentyl)benzamide** (Figure 3, **3i**). From (*E*)-2-(5-(benzyloxy)pent-1-en-1-yl)-4,4,5,5-tetramethyl-1,3,2-dioxaborolane (**1i**) (60.4 mg, 0.20 mmol, 1.0 equiv) and 3-phenyl-1,4,2-dioxazol-5-one (**2a**) (48.9 mg, 0.30 mmol, 1.5 equiv), the title compound was prepared following the general procedure **A** using  $\text{NiCl}_2 \cdot 6\text{H}_2\text{O}$  (4.8 mg, 10 mol%), **L\*** (8.0 mg, 12 mol%), LiI (13.4 mg, 0.10 mmol, 0.50 equiv),  $\text{H}_2\text{O}$  (1.8  $\mu\text{L}$ , 0.10 mmol, 0.50 equiv),  $(\text{EtO})_3\text{SiH}$  (92  $\mu\text{L}$ , 0.50 mmol, 2.5 equiv), anhydrous DMA (1.0 mL). The reaction mixture was stirred for 20 h at 25 °C. The crude material was purified by flash column chromatography (petroleum ether/EtOAc = 1:1) to provide the title compound as a colorless oil in 66% yield (55.9 mg).

**<sup>1</sup>H NMR** (500 MHz,  $\text{CDCl}_3$ )  $\delta$  7.93 (s, 1H), 7.77 (d,  $J = 7.5$  Hz, 2H), 7.50 (t,  $J = 7.5$  Hz, 1H), 7.36 (t,  $J = 7.8$  Hz, 2H), 7.33 – 7.29 (m, 4H), 7.28 – 7.24 (m, 1H), 4.50 (s, 2H), 3.51 (t,  $J = 6.3$  Hz, 2H), 2.90 – 2.80 (m, 1H), 1.76 – 1.57 (m, 4H), 1.57 – 1.51 (m, 2H), 1.26 (s, 12H);

**<sup>13</sup>C NMR** (126 MHz,  $\text{CDCl}_3$ )  $\delta$  171.0, 138.6, 133.2, 128.7, 128.5, 128.1, 127.8, 127.7, 81.1, 73.1, 70.6, 30.9, 29.6, 25.4, 25.2, 24.6;

**<sup>11</sup>B NMR** (160 MHz,  $\text{CDCl}_3$ )  $\delta$  18.3;

**HRMS** (ESI) calcd. for  $\text{C}_{25}\text{H}_{34}\text{BNNaO}_4$   $[\text{M}+\text{Na}]^+$   $m/z$  446.2473, found 446.2462;

**IR** (neat,  $\text{cm}^{-1}$ ) 3195, 2927, 2856, 1610, 1098, 707;

$[\alpha]_D^{25} = -41.6$  ( $c = 1.06$ ,  $\text{CHCl}_3$ );

**HPLC analysis:** the *ee* (96%) was determined using a CHIRALPAK<sup>®</sup> IG-3 column, 5% EtOH in hexane, 1.0 mL/min, 254 nm UV detector,  $t_R$  (major) = 8.3 min,  $t_R$  (minor) =



11.6 min.

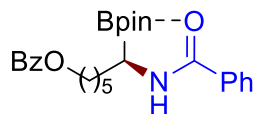

**(R)-6-Benzamido-6-(4,4,5,5-tetramethyl-1,3,2-dioxaborolan-2-yl)hexyl benzoate**

(Figure 3, **3j**). From (*E*)-6-(4,4,5,5-tetramethyl-1,3,2-dioxaborolan-2-yl)hex-5-en-1-yl benzoate (**1j**) (66.0 mg, 0.20 mmol, 1.0 equiv) and 3-phenyl-1,4,2-dioxazol-5-one (**2a**) (48.9 mg, 0.30 mmol, 1.5 equiv), the title compound was prepared following the general procedure **A** using NiCl<sub>2</sub>·6H<sub>2</sub>O (4.8 mg, 10 mol%), **L\*** (8.0 mg, 12 mol%), LiI (13.4 mg, 0.10 mmol, 0.50 equiv), H<sub>2</sub>O (1.8 μL, 0.10 mmol, 0.50 equiv), (EtO)<sub>3</sub>SiH (92 μL, 0.50 mmol, 2.5 equiv), anhydrous DMA (1.0 mL). The reaction mixture was stirred for 20 h at 25 °C. The crude material was purified by flash column chromatography (petroleum ether/EtOAc = 3:2) to provide the title compound as a colorless oil in 66% yield (59.7 mg).

<sup>1</sup>H NMR (500 MHz, CDCl<sub>3</sub>) δ 8.06 – 7.92 (m, 3H), 7.87 (d, *J* = 7.3 Hz, 2H), 7.57 – 7.48 (m, 2H), 7.44 – 7.37 (m, 4H), 4.48 – 4.39 (m, 1H), 4.32 – 4.22 (m, 1H), 2.83 (t, *J* = 5.9 Hz, 1H), 1.87 – 1.78 (m, 1H), 1.78 – 1.67 (m, 2H), 1.66 – 1.57 (m, 1H), 1.56 – 1.39 (m, 4H), 1.26 (s, 6H), 1.25 (s, 6H);

<sup>13</sup>C NMR (126 MHz, CDCl<sub>3</sub>) δ 171.0, 167.2, 133.3, 133.1, 130.5, 129.7, 128.8, 128.5, 128.2, 81.1, 64.7, 31.2, 29.0, 27.1, 25.7, 25.5, 25.2;

<sup>11</sup>B NMR (160 MHz, CDCl<sub>3</sub>) δ 18.2;

HRMS (ESI) calcd. for C<sub>26</sub>H<sub>34</sub>BNNaO<sub>5</sub> [M+Na]<sup>+</sup> *m/z* 474.2422, found 474.2413;

IR (neat, cm<sup>-1</sup>) 3050, 2970, 2930, 1716, 1610, 1265, 1117, 734;

[α]<sub>D</sub><sup>25</sup> = -58.1 (c = 0.98, CHCl<sub>3</sub>);

HPLC analysis: the *ee* (95%) was determined using a CHIRALPAK<sup>®</sup> IF-3 column, 10% EtOH in hexane, 1.0 mL/min, 254 nm UV detector, *t*<sub>R</sub> (major) = 6.8 min, *t*<sub>R</sub> (minor) = 7.6 min.

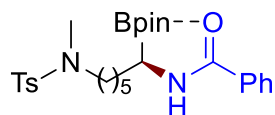

**(R)-N-(6-((N,4-Dimethylphenyl)sulfonamido)-1-(4,4,5,5-tetramethyl-1,3,2-dioxaborolan-2-yl)hexyl)benzamide** (Figure 3, **3k**). From (*E*)-*N*,4-dimethyl-*N*-(6-(4,4,5,5-tetramethyl-1,3,2-dioxaborolan-2-yl)hex-5-en-1-yl)benzenesulfonamide (**1k**) (78.7 mg, 0.20 mmol, 1.0 equiv) and 3-phenyl-1,4,2-dioxazol-5-one (**2a**) (48.9 mg, 0.30 mmol, 1.5 equiv), the title compound was prepared following the general procedure **A** using NiCl<sub>2</sub>·6H<sub>2</sub>O (4.8 mg, 10 mol%), **L**\* (8.0 mg, 12 mol%), LiI (13.4 mg, 0.10 mmol, 0.50 equiv), H<sub>2</sub>O (1.8 μL, 0.10 mmol, 0.50 equiv), (EtO)<sub>3</sub>SiH (92 μL, 0.50 mmol, 2.5 equiv), anhydrous DMA (1.0 mL). The reaction mixture was stirred for 20 h at 25 °C. The crude material was purified by flash column chromatography (petroleum ether/EtOAc = 3:2) to provide the title compound as a white solid in 57% yield (58.7 mg).

<sup>1</sup>H NMR (500 MHz, CDCl<sub>3</sub>) δ 8.10 (s, 1H), 7.92 (d, *J* = 7.5 Hz, 2H), 7.63 (d, *J* = 8.2 Hz, 2H), 7.51 (t, *J* = 7.4 Hz, 1H), 7.39 (t, *J* = 7.7 Hz, 2H), 7.30 (d, *J* = 8.1 Hz, 2H), 3.21 – 3.11 (m, 1H), 2.93 – 2.85 (m, 1H), 2.82 – 2.73 (m, 1H), 2.68 (s, 3H), 2.42 (s, 3H), 1.72 – 1.43 (m, 7H), 1.38 – 1.31 (m, 1H), 1.27 (s, 6H), 1.26 (s, 6H);

<sup>13</sup>C NMR (126 MHz, CDCl<sub>3</sub>) δ 171.3, 143.5, 134.4, 133.2, 129.8, 128.7, 128.4, 127.9, 127.4, 80.8, 49.0, 34.5, 30.9, 26.4, 26.0, 25.5, 25.2, 24.8, 21.6;

<sup>11</sup>B NMR (160 MHz, CDCl<sub>3</sub>) δ 17.3;

**HRMS** (ESI) calcd. for C<sub>27</sub>H<sub>39</sub>BN<sub>2</sub>NaO<sub>5</sub>S [M+Na]<sup>+</sup> *m/z* 537.2565, found 537.2556;

**IR** (neat, cm<sup>-1</sup>) 3050, 2929, 1610, 1156, 732;

**m.p.** 123 – 125 °C;

[α]<sub>D</sub><sup>25</sup> = –25.5 (c = 1.05, CHCl<sub>3</sub>);

**HPLC analysis:** the *ee* (97%) was determined using a CHIRALPAK<sup>®</sup> IG-3 column, 20% EtOH in hexane, 1.0 mL/min, 254 nm UV detector, *t*<sub>R</sub> (major) = 9.7 min, *t*<sub>R</sub> (minor) = 12.3 min.

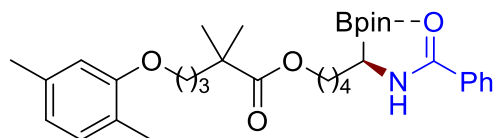

**(R)-5-Benzamido-5-(4,4,5,5-tetramethyl-1,3,2-dioxaborolan-2-yl)pentyl 5-(2,5-dimethylphenoxy)-2,2-dimethylpentanoate** (Figure 3, **3I**). From (*E*)-5-(4,4,5,5-tetramethyl-1,3,2-dioxaborolan-2-yl)pent-4-en-1-yl 5-(2,5-dimethylphenoxy)-2,2-dimethylpentanoate (**1I**) (88.9 mg, 0.20 mmol, 1.0 equiv) and 3-phenyl-1,4,2-dioxazol-5-one (**2a**) (48.9 mg, 0.30 mmol, 1.5 equiv), the title compound was prepared following the general procedure A using NiCl<sub>2</sub>·6H<sub>2</sub>O (4.8 mg, 10 mol%), **L\*** (8.0 mg, 12 mol%), LiI (13.4 mg, 0.10 mmol, 0.50 equiv), H<sub>2</sub>O (1.8 μL, 0.10 mmol, 0.50 equiv), (EtO)<sub>3</sub>SiH (92 μL, 0.50 mmol, 2.5 equiv), anhydrous DMA (1.0 mL). The reaction mixture was stirred for 20 h at 25 °C. The crude material was purified by flash column chromatography (petroleum ether/EtOAc = 3:2) to provide the title compound as a colorless oil in 60% yield (67.9 mg).

<sup>1</sup>H NMR (500 MHz, CDCl<sub>3</sub>) δ 8.19 (s, 1H), 7.82 (d, *J* = 7.5 Hz, 2H), 7.50 (t, *J* = 7.4 Hz, 1H), 7.37 (t, *J* = 7.7 Hz, 2H), 6.99 (d, *J* = 7.5 Hz, 1H), 6.65 (d, *J* = 7.5 Hz, 1H), 6.59 (s, 1H), 4.07 (t, *J* = 6.1 Hz, 2H), 3.90 (t, *J* = 5.5 Hz, 2H), 2.83 (t, *J* = 6.0 Hz, 1H), 2.29 (s, 3H), 2.16 (s, 3H), 1.79 – 1.61 (m, 7H), 1.61 – 1.53 (m, 1H), 1.53 – 1.41 (m, 2H), 1.28 (s, 6H), 1.27 (s, 6H), 1.20 (s, 6H);

<sup>13</sup>C NMR (126 MHz, CDCl<sub>3</sub>) δ 178.2, 171.1, 157.0, 136.6, 133.3, 130.4, 128.6, 128.3, 127.7, 123.7, 120.8, 112.1, 81.1, 68.1, 64.5, 42.2, 37.2, 31.0, 28.9, 25.4, 25.3, 25.2, 24.1, 21.5, 15.9;

<sup>11</sup>B NMR (160 MHz, CDCl<sub>3</sub>) δ 17.9;

HRMS (ESI) calcd. for C<sub>33</sub>H<sub>48</sub>BNNaO<sub>6</sub> [M+Na]<sup>+</sup> *m/z* 588.3467, found 588.3453;

IR (neat, cm<sup>-1</sup>) 2925, 1725, 1610, 1151, 1127, 707;

[α]<sub>D</sub><sup>25</sup> = -30.3 (c = 0.98, CHCl<sub>3</sub>);

**HPLC analysis:** the *ee* (96%) was determined using a CHIRALPAK<sup>®</sup> AD-H column, 8% *i*PrOH in hexane, 0.8 mL/min, 240 nm UV detector, *t*<sub>R</sub> (minor) = 7.0 min, *t*<sub>R</sub> (major) = 8.1 min.

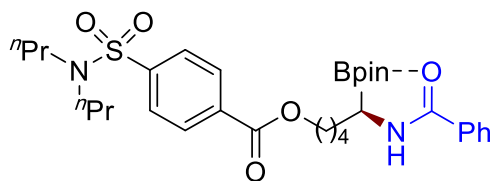

**(R)-5-Benzamido-5-(4,4,5,5-tetramethyl-1,3,2-dioxaborolan-2-yl)pentyl 4-(N,N-dipropylsulfamoyl)benzoate** (Figure 3, **3m**). From (*E*)-5-(4,4,5,5-tetramethyl-1,3,2-dioxaborolan-2-yl)pent-4-en-1-yl 4-(*N,N*-dipropylsulfamoyl)benzoate (**1m**) (95.9 mg, 0.20 mmol, 1.0 equiv) and 3-phenyl-1,4,2-dioxazol-5-one (**2a**) (48.9 mg, 0.30 mmol, 1.5 equiv), the title compound was prepared following the general procedure **A** using NiCl<sub>2</sub>·6H<sub>2</sub>O (4.8 mg, 10 mol%), L\* (8.0 mg, 12 mol%), LiI (13.4 mg, 0.10 mmol, 0.50 equiv), H<sub>2</sub>O (1.8 μL, 0.10 mmol, 0.50 equiv), (EtO)<sub>3</sub>SiH (92 μL, 0.50 mmol, 2.5 equiv), anhydrous DMA (1.0 mL). The reaction mixture was stirred for 20 h at 25 °C. The crude material was purified by flash column chromatography (petroleum ether/EtOAc = 2:3) to provide the title compound as a colorless oil in 60% yield (72.2 mg).

<sup>1</sup>H NMR (500 MHz, CDCl<sub>3</sub>) δ 8.13 (d, *J* = 8.4 Hz, 2H), 7.84 (d, *J* = 8.4 Hz, 2H), 7.82 (d, *J* = 7.4 Hz, 2H), 7.55 (t, *J* = 7.4 Hz, 1H), 7.52 (s, 1H), 7.42 (t, *J* = 7.7 Hz, 2H), 4.37 (t, *J* = 6.5 Hz, 2H), 3.13 – 3.04 (m, 4H), 2.98 – 2.88 (m, 1H), 1.89 – 1.75 (m, 3H), 1.69 – 1.49 (m, 7H), 1.26 (s, 6H), 1.26 (s, 6H), 0.86 (t, *J* = 7.4 Hz, 6H);

<sup>13</sup>C NMR (126 MHz, CDCl<sub>3</sub>) δ 170.9, 165.6, 144.3, 133.8, 133.3, 130.3, 128.8, 128.0, 127.1, 81.5, 65.7, 50.1, 31.1, 28.9, 25.4, 25.2, 24.2, 22.1, 11.3;

<sup>11</sup>B NMR (160 MHz, CDCl<sub>3</sub>) δ 18.0;

HRMS (ESI) calcd. for C<sub>31</sub>H<sub>45</sub>BN<sub>2</sub>NaO<sub>7</sub>S [M+Na]<sup>+</sup> *m/z* 623.2933, found 623.2923;

IR (neat, cm<sup>-1</sup>) 2967, 2932, 1721, 1609, 1272, 1155, 1087, 601;

[α]<sub>D</sub><sup>25</sup> = -30.7 (c = 1.04, CHCl<sub>3</sub>);

**HPLC analysis:** the *ee* (96%) was determined using a CHIRALPAK<sup>®</sup> ID-3 column, 15% EtOH in hexane, 1.0 mL/min, 254 nm UV detector, *t*<sub>R</sub> (major) = 9.2 min, *t*<sub>R</sub> (minor) = 13.5 min.

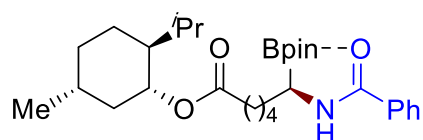

**(1R,2S,5R)-2-isopropyl-5-methylcyclohexyl**      **(R)-6-benzamido-6-(4,4,5,5-tetramethyl-1,3,2-dioxaborolan-2-yl)hexanoate** (Figure 3, **3n**). From (1R,2S,5R)-2-isopropyl-5-methylcyclohexyl

(*E*)-6-(4,4,5,5-tetramethyl-1,3,2-dioxaborolan-2-yl)hex-5-enoate (**1n**) (75.7 mg, 0.20 mmol, 1.0 equiv) and 3-phenyl-1,4,2-dioxazol-5-one (**2a**) (48.9 mg, 0.30 mmol, 1.5 equiv), the title compound was prepared following the general procedure A using NiCl<sub>2</sub>·6H<sub>2</sub>O (4.8 mg, 10 mol%), **L\*** (8.0 mg, 12 mol%), LiI (13.4 mg, 0.10 mmol, 0.50 equiv), H<sub>2</sub>O (1.8 μL, 0.10 mmol, 0.50 equiv), (EtO)<sub>3</sub>SiH (92 μL, 0.50 mmol, 2.5 equiv), anhydrous DMA (1.0 mL). The reaction mixture was stirred for 20 h at 25 °C. The crude material was purified by flash column chromatography (petroleum ether/EtOAc = 2:1) to provide the title compound as a colorless oil in 58% yield (58.1 mg).

**<sup>1</sup>H NMR** (500 MHz, CDCl<sub>3</sub>) δ 8.44 (s, 1H), 7.90 (d, *J* = 7.5 Hz, 2H), 7.53 (t, *J* = 7.4 Hz, 1H), 7.40 (t, *J* = 7.7 Hz, 2H), 4.69 (td, *J* = 10.9, 4.3 Hz, 1H), 2.93 – 2.84 (m, 1H), 2.43 – 2.22 (m, 2H), 2.00 – 1.92 (m, 1H), 1.90 – 1.80 (m, 1H), 1.78 – 1.62 (m, 5H), 1.62 – 1.54 (m, 1H), 1.54 – 1.41 (m, 3H), 1.41 – 1.32 (m, 1H), 1.27 (s, 6H), 1.27 (s, 6H), 1.10 – 0.92 (m, 2H), 0.89 (d, *J* = 3.9 Hz, 3H), 0.89 – 0.81 (m, 4H), 0.76 (d, *J* = 7.0 Hz, 3H);

**<sup>13</sup>C NMR** (126 MHz, CDCl<sub>3</sub>) δ 174.4, 171.2, 133.3, 128.7, 128.3, 127.8, 81.0, 74.5, 47.1, 41.1, 34.4, 34.3, 31.6, 30.0, 27.1, 26.4, 25.4, 25.2, 24.0, 23.6, 22.2, 20.8, 16.4;

**<sup>11</sup>B NMR** (160 MHz, CDCl<sub>3</sub>) δ 17.2;

**HRMS** (ESI) calcd. for C<sub>29</sub>H<sub>46</sub>BNNaO<sub>5</sub> [M+Na]<sup>+</sup> *m/z* 500.3542, found 500.3531;

**IR** (neat, cm<sup>-1</sup>) 2957, 2928, 1724, 1610, 1113;

[α]<sub>D</sub><sup>25</sup> = -59.2 (*c* = 1.01, CHCl<sub>3</sub>);

**HPLC analysis:** the *dr* (98:2) was determined using a CHIRALPAK<sup>®</sup> AD-H column, 5% *i*PrOH in hexane, 1.0 mL/min, 240 nm UV detector, *t*<sub>R</sub> (major) = 5.7 min, *t*<sub>R</sub> (minor) = 8.6 min.

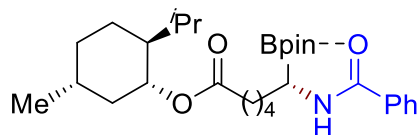

**(1R,2S,5R)-2-isopropyl-5-methylcyclohexyl (S)-6-benzamido-6-(4,4,5,5-tetramethyl-1,3,2-dioxaborolan-2-yl)hexanoate** (Figure 3, **3n'**). From (1R,2S,5R)-2-

isopropyl-5-methylcyclohexyl (*E*)-6-(4,4,5,5-tetramethyl-1,3,2-dioxaborolan-2-yl)hex-5-enoate (**1n**) (75.7 mg, 0.20 mmol, 1.0 equiv) and 3-phenyl-1,4,2-dioxazol-5-one (**2a**) (48.9 mg, 0.30 mmol, 1.5 equiv), the title compound was prepared following the general procedure **A** using NiCl<sub>2</sub>·6H<sub>2</sub>O (4.8 mg, 10 mol%), *ent-L*\* (8.0 mg, 12 mol%), LiI (13.4 mg, 0.10 mmol, 0.50 equiv), H<sub>2</sub>O (1.8 μL, 0.10 mmol, 0.50 equiv), (EtO)<sub>3</sub>SiH (92 μL, 0.50 mmol, 2.5 equiv), anhydrous DMA (1.0 mL). The reaction mixture was stirred for 20 h at 25 °C. The crude material was purified by flash column chromatography (petroleum ether/EtOAc = 2:1) to provide the title compound as a colorless oil in 55% yield (55.0 mg).

**<sup>1</sup>H NMR** (500 MHz, CDCl<sub>3</sub>) δ 8.41 (s, 1H), 7.89 (d, *J* = 7.6 Hz, 2H), 7.53 (t, *J* = 7.4 Hz, 1H), 7.40 (t, *J* = 7.7 Hz, 2H), 4.71 (td, *J* = 10.9, 4.4 Hz, 1H), 2.94 – 2.86 (m, 1H), 2.43 – 2.22 (m, 2H), 2.02 – 1.92 (m, 1H), 1.87 – 1.78 (m, 1H), 1.79 – 1.62 (m, 5H), 1.62 – 1.54 (m, 1H), 1.54 – 1.40 (m, 3H), 1.40 – 1.32 (m, 1H), 1.27 (s, 6H), 1.26 (s, 6H), 1.11 – 0.93 (m, 2H), 0.90 (d, *J* = 6.5 Hz, 3H), 0.88 – 0.81 (m, 4H), 0.73 (d, *J* = 6.9 Hz, 3H);

**<sup>13</sup>C NMR** (126 MHz, CDCl<sub>3</sub>) δ 174.4, 171.2, 133.3, 128.7, 128.3, 127.8, 81.0, 74.6, 47.1, 41.1, 34.4, 34.3, 31.6, 30.0, 27.1, 26.4, 25.4, 25.1, 23.9, 23.6, 22.2, 20.9, 16.5;

**<sup>11</sup>B NMR** (160 MHz, CDCl<sub>3</sub>) δ 17.2;

**HRMS** (ESI) calcd. for C<sub>29</sub>H<sub>46</sub>BNNaO<sub>5</sub> [M+Na]<sup>+</sup> *m/z* 500.3542, found 500.3532;

**IR** (neat, cm<sup>-1</sup>) 2954, 2926, 1711, 1603, 1106;

[α]<sub>D</sub><sup>25</sup> = +7.1 (c = 0.98, CHCl<sub>3</sub>);

**HPLC analysis:** the *dr* (2:98) was determined using a CHIRALPAK<sup>®</sup> AD-H column, 5% *i*PrOH in hexane, 1.0 mL/min, 240 nm UV detector, *t*<sub>R</sub> (minor) = 5.7 min, *t*<sub>R</sub> (major) = 8.6 min.

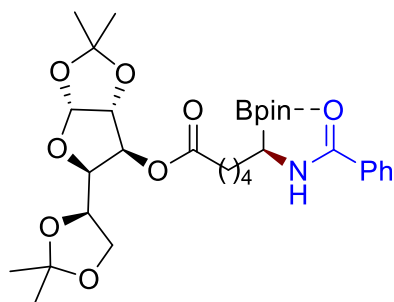

**(3aR,5R,6S,6aR)-5-((R)-2,2-dimethyl-1,3-dioxolan-4-yl)-2,2-dimethyltetrahydrofuro[2,3-d][1,3]dioxol-6-yl (R)-6-benzamido-6-(4,4,5,5-tetramethyl-1,3,2-dioxaborolan-2-yl)hexanoate** (Figure 3, **3o**). From (3aR,5R,6S,6aR)-5-((R)-2,2-dimethyl-1,3-dioxolan-4-yl)-2,2-dimethyltetrahydrofuro[2,3-d][1,3]dioxol-6-yl (*E*)-6-(4,4,5,5-tetramethyl-1,3,2-dioxaborolan-2-yl)hex-5-enoate (**1o**) (96.5 mg, 0.20 mmol, 1.0 equiv) and 3-phenyl-1,4,2-dioxazol-5-one (**2a**) (48.9 mg, 0.30 mmol, 1.5 equiv), the title compound was prepared following the general procedure A using NiCl<sub>2</sub>·6H<sub>2</sub>O (4.8 mg, 10 mol%), **L\*** (8.0 mg, 12 mol%), LiI (13.4 mg, 0.10 mmol, 0.50 equiv), H<sub>2</sub>O (1.8 μL, 0.10 mmol, 0.50 equiv), (EtO)<sub>3</sub>SiH (92 μL, 0.50 mmol, 2.5 equiv), anhydrous DMA (1.0 mL). The reaction mixture was stirred for 20 h at 25 °C. The crude material was purified by flash column chromatography (petroleum ether/EtOAc = 1:1) to provide the title compound as a colorless oil in 58% yield (70.3 mg).

<sup>1</sup>H NMR (500 MHz, CDCl<sub>3</sub>) δ 8.22 (s, 1H), 7.87 (d, *J* = 7.3 Hz, 2H), 7.53 (t, *J* = 7.4 Hz, 1H), 7.41 (t, *J* = 7.8 Hz, 2H), 5.87 (d, *J* = 3.6 Hz, 1H), 5.30 (d, *J* = 2.7 Hz, 1H), 4.49 (d, *J* = 3.7 Hz, 1H), 4.23 – 4.14 (m, 2H), 4.10 – 4.04 (m, 1H), 4.02 – 3.96 (m, 1H), 2.92 – 2.84 (m, 1H), 2.47 – 2.32 (m, 2H), 1.80 – 1.56 (m, 4H), 1.56 – 1.41 (m, 5H), 1.34 (s, 3H), 1.30 (s, 3H), 1.29 – 1.24 (m, 15H);

<sup>13</sup>C NMR (126 MHz, CDCl<sub>3</sub>) δ 173.1, 171.2, 133.4, 128.8, 128.3, 127.7, 112.4, 109.5, 105.2, 83.5, 81.1, 80.1, 76.2, 72.6, 67.4, 34.0, 30.3, 26.9, 26.9, 26.4, 25.4, 25.4, 25.1, 23.9;

<sup>11</sup>B NMR (160 MHz, CDCl<sub>3</sub>) δ 17.7;

HRMS (ESI) calcd. for C<sub>31</sub>H<sub>46</sub>BNNaO<sub>10</sub> [M+Na]<sup>+</sup> *m/z* 626.3107, found 626.3105;

IR (neat, cm<sup>-1</sup>) 2986, 2933, 1745, 1610, 1373, 1155;

$[\alpha]_D^{25} = -46.6$  ( $c = 1.00$ ,  $\text{CHCl}_3$ );

**HPLC analysis:** the *dr* (97:3) was determined using a CHIRALPAK<sup>®</sup> IF-3 column, 12% EtOH in hexane, 1.0 mL/min, 240 nm UV detector,  $t_R$  (major) = 6.8 min,  $t_R$  (minor) = 7.5 min.

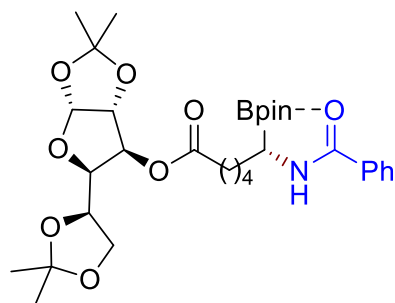

**(3aR,5R,6S,6aR)-5-((R)-2,2-dimethyl-1,3-dioxolan-4-yl)-2,2-dimethyltetrahydrofuro[2,3-*d*][1,3]dioxol-6-yl (S)-6-benzamido-6-(4,4,5,5-**

**tetramethyl-1,3,2-dioxaborolan-2-yl)hexanoate** (Figure 3, **3o'**). From

(3aR,5R,6S,6aR)-5-((R)-2,2-dimethyl-1,3-dioxolan-4-yl)-2,2-dimethyltetrahydrofuro[2,3-*d*][1,3]dioxol-6-yl (*E*)-6-(4,4,5,5-tetramethyl-1,3,2-dioxaborolan-2-yl)hex-5-enoate (**1o**) (96.5 mg, 0.20 mmol, 1.0 equiv) and 3-phenyl-1,4,2-dioxazol-5-one (**2a**) (48.9 mg, 0.30 mmol, 1.5 equiv), the title compound was prepared following the general procedure **A** using  $\text{NiCl}_2 \cdot 6\text{H}_2\text{O}$  (4.8 mg, 10 mol%), *ent*-**L\*** (8.0 mg, 12 mol%), LiI (13.4 mg, 0.10 mmol, 0.50 equiv),  $\text{H}_2\text{O}$  (1.8  $\mu\text{L}$ , 0.10 mmol, 0.50 equiv),  $(\text{EtO})_3\text{SiH}$  (92  $\mu\text{L}$ , 0.50 mmol, 2.5 equiv), anhydrous DMA (1.0 mL). The reaction mixture was stirred for 20 h at 25 °C. The crude material was purified by flash column chromatography (petroleum ether/EtOAc = 1:1) to provide the title compound as a colorless oil in 61% yield (73.4 mg).

**<sup>1</sup>H NMR** (500 MHz,  $\text{CDCl}_3$ )  $\delta$  8.24 (s, 1H), 7.87 (d,  $J = 7.3$  Hz, 2H), 7.53 (t,  $J = 7.5$  Hz, 1H), 7.42 (t,  $J = 7.8$  Hz, 2H), 5.87 (d,  $J = 3.7$  Hz, 1H), 5.28 (d,  $J = 2.0$  Hz, 1H), 4.47 (d,  $J = 3.7$  Hz, 1H), 4.24 – 4.17 (m, 2H), 4.11 – 4.05 (m, 1H), 4.04 – 3.98 (m, 1H), 2.91 – 2.82 (m, 1H), 2.49 – 2.30 (m, 2H), 1.80 – 1.56 (m, 4H), 1.55 – 1.42 (m, 5H), 1.39 (s, 3H), 1.30 (s, 3H), 1.29 (s, 3H), 1.27 (s, 6H), 1.26 (s, 6H);

**<sup>13</sup>C NMR** (126 MHz,  $\text{CDCl}_3$ )  $\delta$  173.2, 171.2, 133.4, 128.8, 128.3, 127.8, 112.4, 109.5,



105.2, 83.6, 81.1, 79.9, 76.3, 72.5, 67.4, 33.9, 30.2, 27.0, 27.0, 26.9, 26.4, 25.4, 25.4, 25.1, 24.0;

$^{14}\text{B}$  NMR (160 MHz,  $\text{CDCl}_3$ )  $\delta$  17.5;

HRMS (ESI) calcd. for  $\text{C}_{31}\text{H}_{46}\text{BNNaO}_{10}$   $[\text{M}+\text{Na}]^+$   $m/z$  626.3107, found 626.3109;

IR (neat,  $\text{cm}^{-1}$ ) 2987, 2934, 1746, 1610, 1373, 1157;

$[\alpha]_{\text{D}}^{25} = +14.1$  ( $c = 1.00$ ,  $\text{CHCl}_3$ );

HPLC analysis: the *dr* (3:97) was determined using a CHIRALPAK<sup>®</sup> IF-3 column, 12% EtOH in hexane, 1.0 mL/min, 240 nm UV detector,  $t_{\text{R}}$  (minor) = 6.7 min,  $t_{\text{R}}$  (major) = 7.5 min.

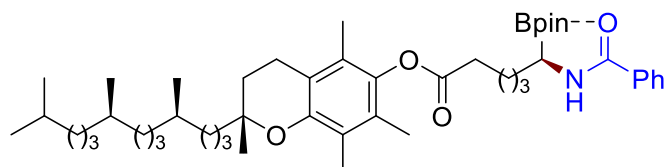

**(R)-2,5,7,8-tetramethyl-2-((4R,8R)-4,8,12-trimethyltridecyl)chroman-6-yl (R)-6-benzamido-6-(4,4,5,5-tetramethyl-1,3,2-dioxaborolan-2-yl)hexanoate** (Figure 3, **3p**). From **(R)-2,5,7,8-tetramethyl-2-((4R,8R)-4,8,12-trimethyltridecyl)chroman-6-yl (E)-6-(4,4,5,5-tetramethyl-1,3,2-dioxaborolan-2-yl)hex-5-enoate (1p)** (130.6 mg, 0.20 mmol, 1.0 equiv) and **3-phenyl-1,4,2-dioxazol-5-one (2a)** (48.9 mg, 0.30 mmol, 1.5 equiv), the title compound was prepared following the general procedure **A** using  $\text{NiCl}_2 \cdot 6\text{H}_2\text{O}$  (4.8 mg, 10 mol%), **L\*** (8.0 mg, 12 mol%), LiI (13.4 mg, 0.10 mmol, 0.50 equiv),  $\text{H}_2\text{O}$  (1.8  $\mu\text{L}$ , 0.10 mmol, 0.50 equiv),  $(\text{EtO})_3\text{SiH}$  (92  $\mu\text{L}$ , 0.50 mmol, 2.5 equiv), anhydrous DMA (1.0 mL). The reaction mixture was stirred for 20 h at 25 °C. The crude material was purified by flash column chromatography (petroleum ether/EtOAc = 5:2) to provide the title compound as a colorless oil in 57% yield (88.7 mg).

$^1\text{H}$  NMR (500 MHz,  $\text{CDCl}_3$ )  $\delta$  8.44 (s, 1H), 7.81 (d,  $J = 7.6$  Hz, 2H), 7.49 (t,  $J = 7.4$  Hz, 1H), 7.32 (t,  $J = 7.6$  Hz, 2H), 2.91 – 2.82 (m, 1H), 2.73 – 2.51 (m, 4H), 2.08 (s, 3H), 2.02 – 1.84 (m, 7H), 1.84 – 1.65 (m, 5H), 1.64 – 1.47 (m, 5H), 1.45 – 1.33 (m, 4H), 1.32 – 1.18 (m, 23H), 1.17 – 1.01 (m, 6H), 0.90 – 0.79 (m, 12H);

$^{13}\text{C}$  NMR (126 MHz,  $\text{CDCl}_3$ )  $\delta$  173.4, 171.2, 149.5, 140.6, 133.3, 128.7, 128.3, 127.6,

126.7, 124.9, 123.1, 117.5, 80.9, 75.2, 39.5, 37.6, 37.6, 37.4, 33.9, 32.9, 32.8, 31.2, 30.3, 28.1, 27.2, 25.4, 25.2, 24.9, 24.6, 24.2, 22.9, 22.8, 21.2, 20.7, 19.9, 19.8, 13.2, 12.3, 12.0;

$^{11}\text{B}$  NMR (160 MHz,  $\text{CDCl}_3$ )  $\delta$  17.2;

HRMS (ESI) calcd. for  $\text{C}_{48}\text{H}_{76}\text{BNNaO}_6$   $[\text{M}+\text{Na}]^+$   $m/z$  796.5658, found 796.5652;

IR (neat,  $\text{cm}^{-1}$ ) 2925, 2866, 1751, 1610, 1110;

$[\alpha]_{\text{D}}^{25} = -19.2$  ( $c = 1.01$ ,  $\text{CHCl}_3$ );

HPLC analysis: the *dr* (98:2) was determined using a CHIRALPAK<sup>®</sup> ID-3 column, 10% EtOH in hexane, 1.0 mL/min, 240 nm UV detector,  $t_{\text{R}}$  (major) = 4.9 min,  $t_{\text{R}}$  (minor) = 5.7 min.

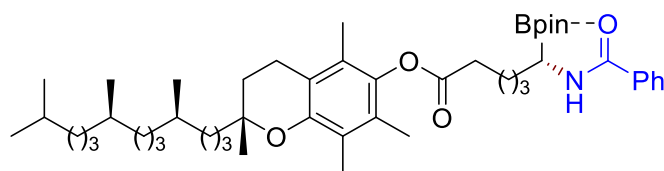

**(R)-2,5,7,8-tetramethyl-2-((4R,8R)-4,8,12-trimethyltridecyl)chroman-6-yl (S)-6-benzamido-6-(4,4,5,5-tetramethyl-1,3,2-dioxaborolan-2-yl)hexanoate** (Figure 3, **3p'**). From *(R)*-2,5,7,8-tetramethyl-2-((4R,8R)-4,8,12-trimethyltridecyl)chroman-6-yl (*E*)-6-(4,4,5,5-tetramethyl-1,3,2-dioxaborolan-2-yl)hex-5-enoate (**1p**) (130.6 mg, 0.20 mmol, 1.0 equiv) and 3-phenyl-1,4,2-dioxazol-5-one (**2a**) (48.9 mg, 0.30 mmol, 1.5 equiv), the title compound was prepared following the general procedure **A** using  $\text{NiCl}_2 \cdot 6\text{H}_2\text{O}$  (4.8 mg, 10 mol%), *ent*-**L**\* (8.0 mg, 12 mol%), LiI (13.4 mg, 0.10 mmol, 0.50 equiv),  $\text{H}_2\text{O}$  (1.8  $\mu\text{L}$ , 0.10 mmol, 0.50 equiv),  $(\text{EtO})_3\text{SiH}$  (92  $\mu\text{L}$ , 0.50 mmol, 2.5 equiv), anhydrous DMA (1.0 mL). The reaction mixture was stirred for 20 h at 25 °C. The crude material was purified by flash column chromatography (petroleum ether/EtOAc = 5:2) to provide the title compound as a colorless oil in 58% yield (90.5 mg).

$^1\text{H}$  NMR (500 MHz,  $\text{CDCl}_3$ )  $\delta$  8.52 (s, 1H), 7.81 (d,  $J = 7.7$  Hz, 2H), 7.48 (t,  $J = 7.4$  Hz, 1H), 7.31 (t,  $J = 7.6$  Hz, 2H), 2.90 – 2.82 (m, 1H), 2.72 – 2.51 (m, 4H), 2.08 (s, 3H), 2.03 – 1.84 (m, 7H), 1.84 – 1.65 (m, 5H), 1.63 – 1.46 (m, 5H), 1.44 – 1.32 (m, 4H),

1.31 – 1.20 (m, 23H), 1.16 – 1.03 (m, 6H), 0.89 – 0.81 (m, 12H);

<sup>13</sup>C NMR (126 MHz, CDCl<sub>3</sub>) δ 173.4, 171.2, 149.5, 140.6, 133.3, 128.6, 128.3, 127.5, 126.7, 124.9, 123.1, 117.5, 80.9, 75.2, 39.5, 37.6, 37.6, 37.4, 33.9, 32.9, 32.8, 31.2, 30.3, 28.1, 27.2, 25.4, 25.2, 24.9, 24.6, 24.2, 22.9, 22.8, 21.2, 20.7, 19.9, 19.8, 13.2, 12.3, 12.0;

<sup>11</sup>B NMR (160 MHz, CDCl<sub>3</sub>) δ 17.1;

HRMS (ESI) calcd. for C<sub>48</sub>H<sub>76</sub>BNNaO<sub>6</sub> [M+Na]<sup>+</sup> m/z 796.5658, found 796.5654;

IR (neat, cm<sup>-1</sup>) 2926, 2867, 1750, 1610, 1110;

[α]<sub>D</sub><sup>25</sup> = +26.7 (c = 1.07, CHCl<sub>3</sub>);

**HPLC analysis:** the *dr* (2:98) was determined using a CHIRALPAK<sup>®</sup> ID-3 column, 10% EtOH in hexane, 1.0 mL/min, 240 nm UV detector, *t*<sub>R</sub> (major) = 4.9 min, *t*<sub>R</sub> (minor) = 5.7 min.

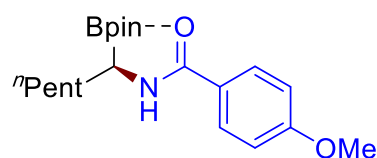

**(R)-4-Methoxy-N-(1-(4,4,5,5-tetramethyl-1,3,2-dioxaborolan-2-yl)hexyl)**

**benzamide** (Figure 4, **4b**). From (*E*)-2-(hex-1-en-1-yl)-4,4,5,5-tetramethyl-1,3,2-dioxaborolane (**1a**) (42.0 mg, 0.20 mmol, 1.0 equiv) and 3-(4-methoxyphenyl)-1,4,2-dioxazol-5-one (**2b**) (57.9 mg, 0.30 mmol, 1.5 equiv), the title compound was prepared following the general procedure **A** using NiCl<sub>2</sub>·6H<sub>2</sub>O (4.8 mg, 10 mol%), **L\*** (8.0 mg, 12 mol%), LiI (13.4 mg, 0.10 mmol, 0.50 equiv), H<sub>2</sub>O (1.8 μL, 0.10 mmol, 0.50 equiv), (EtO)<sub>3</sub>SiH (92 μL, 0.50 mmol, 2.5 equiv), anhydrous DMA (1.0 mL). The reaction mixture was stirred for 20 h at 25 °C. The crude material was purified by flash column chromatography (petroleum ether/EtOAc = 1:1) to provide the title compound as a white solid in 72% yield (51.8 mg).

<sup>1</sup>H NMR (500 MHz, CDCl<sub>3</sub>) δ 8.52 (s, 1H), 7.78 (d, *J* = 8.9 Hz, 2H), 6.79 (d, *J* = 8.9 Hz, 2H), 3.80 (s, 3H), 2.69 (t, *J* = 6.6 Hz, 1H), 1.72 – 1.63 (m, 1H), 1.58 – 1.48 (m, 1H), 1.47 – 1.36 (m, 2H), 1.35 – 1.27 (m, 4H), 1.26 (s, 6H), 1.25 (s, 6H), 0.88 (t, *J* = 7.0 Hz, 3H);

$^{13}\text{C}$  NMR (126 MHz,  $\text{CDCl}_3$ )  $\delta$  170.7, 163.6, 130.5, 119.4, 113.8, 80.7, 55.5, 32.2, 31.4, 27.7, 25.5, 25.3, 22.7, 14.3;

$^{11}\text{B}$  NMR (160 MHz,  $\text{CDCl}_3$ )  $\delta$  15.8;

HRMS (ESI) calcd. for  $\text{C}_{20}\text{H}_{33}\text{BNO}_4$   $[\text{M}+\text{H}]^+$   $m/z$  362.2497, found 362.2489;

IR (neat,  $\text{cm}^{-1}$ ) 3064, 2925, 2854, 1609, 1497, 1260, 1108;

m.p. 166 – 168 °C;

$[\alpha]_{\text{D}}^{25} = -59.2$  ( $c = 0.98$ ,  $\text{CHCl}_3$ );

HPLC analysis: the *ee* (95%) was determined using a CHIRALPAK<sup>®</sup> IG-3 column, 5% EtOH in hexane, 1.0 mL/min, 254 nm UV detector,  $t_{\text{R}}$  (major) = 7.2 min,  $t_{\text{R}}$  (minor) = 8.1 min.

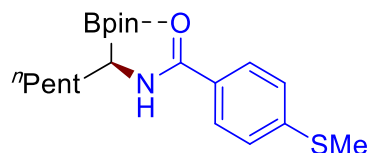

**(R)-4-(Methylthio)-N-(1-(4,4,5,5-tetramethyl-1,3,2-dioxaborolan-2-yl)hexyl)benzamide** (Figure 4, **4c**). From (*E*)-2-(hex-1-en-1-yl)-4,4,5,5-tetramethyl-1,3,2-dioxaborolane (**1a**) (42.0 mg, 0.20 mmol, 1.0 equiv) and 3-(4-(methylthio)phenyl)-1,4,2-dioxazol-5-one (**2c**) (62.8 mg, 0.30 mmol, 1.5 equiv), the title compound was prepared following the general procedure **A** using  $\text{NiCl}_2 \cdot 6\text{H}_2\text{O}$  (4.8 mg, 10 mol%), **L\*** (8.0 mg, 12 mol%), LiI (13.4 mg, 0.10 mmol, 0.50 equiv),  $\text{H}_2\text{O}$  (1.8  $\mu\text{L}$ , 0.10 mmol, 0.50 equiv),  $(\text{EtO})_3\text{SiH}$  (92  $\mu\text{L}$ , 0.50 mmol, 2.5 equiv), anhydrous DMA (1.0 mL). The reaction mixture was stirred for 20 h at 25 °C. The crude material was purified by flash column chromatography (petroleum ether/EtOAc = 2:1) to provide the title compound as a white solid in 61% yield (46.0 mg).

$^1\text{H}$  NMR (500 MHz,  $\text{CDCl}_3$ )  $\delta$  8.68 (s, 1H), 7.70 (d,  $J = 8.5$  Hz, 2H), 7.10 (d,  $J = 8.5$  Hz, 2H), 2.73 (t,  $J = 6.5$  Hz, 1H), 2.47 (s, 3H), 1.74 – 1.63 (m, 1H), 1.59 – 1.49 (m, 1H), 1.48 – 1.37 (m, 2H), 1.35 – 1.27 (m, 4H), 1.27 (s, 12H), 0.88 (t,  $J = 7.0$  Hz, 3H);

$^{13}\text{C}$  NMR (126 MHz,  $\text{CDCl}_3$ )  $\delta$  170.5, 146.2, 128.7, 124.9, 123.2, 81.0, 32.2, 31.4, 27.6, 25.4, 25.3, 22.7, 14.8, 14.2;

$^{11}\text{B}$  NMR (160 MHz,  $\text{CDCl}_3$ )  $\delta$  16.6;

**HRMS** (ESI) calcd. for C<sub>20</sub>H<sub>33</sub>BNO<sub>3</sub>S [M+H]<sup>+</sup> m/z 378.2269, found 378.2260;

**IR** (neat, cm<sup>-1</sup>) 3205, 2969, 2929, 1602, 1547, 1115, 733;

**m.p.** 166 – 167 °C;

[α]<sub>D</sub><sup>25</sup> = -59.5 (c = 1.16, CHCl<sub>3</sub>);

**HPLC analysis:** the *ee* (93%) was determined using a CHIRALPAK® IE-3 column, 5% EtOH in hexane, 1.0 mL/min, 220 nm UV detector, *t*<sub>R</sub> (major) = 9.7 min, *t*<sub>R</sub> (minor) = 10.8 min.

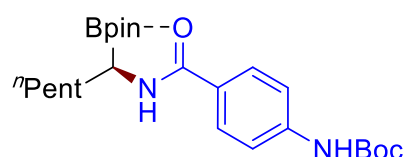

**tert-Butyl (R)-4-((1-(4,4,5,5-tetramethyl-1,3,2-dioxaborolan-2-yl)hexyl)carbamoyl)phenyl)carbamate** (Figure 4, **4d**). From (*E*)-2-(hex-1-en-1-yl)-4,4,5,5-tetramethyl-1,3,2-dioxaborolane (**1a**) (42.0 mg, 0.20 mmol, 1.0 equiv) and *tert*-butyl 4-(5-oxo-1,4,2-dioxazol-3-yl)phenyl)carbamate (**2d**) (83.5 mg, 0.30 mmol, 1.5 equiv), the title compound was prepared following the general procedure **A** using NiCl<sub>2</sub>·6H<sub>2</sub>O (4.8 mg, 10 mol%), **L\*** (8.0 mg, 12 mol%), LiI (13.4 mg, 0.10 mmol, 0.50 equiv), H<sub>2</sub>O (1.8 μL, 0.10 mmol, 0.50 equiv), (EtO)<sub>3</sub>SiH (92 μL, 0.50 mmol, 2.5 equiv), anhydrous DMA (1.0 mL). The reaction mixture was stirred for 20 h at 25 °C. The crude material was purified by flash column chromatography (petroleum ether/EtOAc = 2:1) to provide the title compound as a white solid in 67% yield (59.8 mg).

**<sup>1</sup>H NMR** (500 MHz, CDCl<sub>3</sub>) δ 8.14 (s, 1H), 7.57 (d, *J* = 8.4 Hz, 2H), 7.40 (d, *J* = 8.6 Hz, 2H), 2.77 – 2.67 (m, 1H), 1.76 – 1.65 (m, 1H), 1.56 – 1.38 (m, 12H), 1.36 – 1.24 (m, 16H), 0.85 (t, *J* = 6.4 Hz, 3H);

**<sup>13</sup>C NMR** (126 MHz, CDCl<sub>3</sub>) δ 170.5, 153.2, 143.7, 129.4, 120.3, 117.7, 81.2, 80.6, 32.1, 31.4, 28.5, 28.1, 25.5, 25.4, 22.7, 14.2;

**<sup>11</sup>B NMR** (160 MHz, CDCl<sub>3</sub>) δ 15.5;

**HRMS** (ESI) calcd. for C<sub>24</sub>H<sub>39</sub>BN<sub>2</sub>NaO<sub>5</sub> [M+Na]<sup>+</sup> m/z 469.2844, found 469.2834;

**IR** (neat, cm<sup>-1</sup>) 3224, 2929, 1733, 1605, 1520, 1154, 1096, 737;

**m.p.** 204 – 205 °C;

$[\alpha]_D^{25} = -37.7$  ( $c = 1.10$ ,  $\text{CHCl}_3$ );

**HPLC analysis:** the *ee* (94%) was determined using a CHIRALPAK<sup>®</sup> IF-3 column, 5% EtOH in hexane, 1.0 mL/min, 220 nm UV detector,  $t_R$  (major) = 5.7 min,  $t_R$  (minor) = 6.3 min.

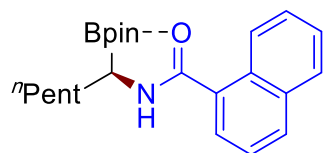

**(R)-N-(1-(4,4,5,5-tetramethyl-1,3,2-dioxaborolan-2-yl)hexyl)-1-naphthamide**

(Figure 4, **4e**). From (*E*)-2-(hex-1-en-1-yl)-4,4,5,5-tetramethyl-1,3,2-dioxaborolane (**1a**) (42.0 mg, 0.20 mmol, 1.0 equiv) and 3-(naphthalen-1-yl)-1,4,2-dioxazol-5-one (**2e**) (64.0 mg, 0.30 mmol, 1.5 equiv), the title compound was prepared following the general procedure **A** using  $\text{NiCl}_2 \cdot 6\text{H}_2\text{O}$  (4.8 mg, 10 mol%), **L\*** (8.0 mg, 12 mol%), LiI (13.4 mg, 0.10 mmol, 0.50 equiv),  $\text{H}_2\text{O}$  (1.8  $\mu\text{L}$ , 0.10 mmol, 0.50 equiv),  $(\text{EtO})_3\text{SiH}$  (92  $\mu\text{L}$ , 0.50 mmol, 2.5 equiv), anhydrous DMA (1.0 mL). The reaction mixture was stirred for 20 h at 25 °C. The crude material was purified by flash column chromatography (petroleum ether/EtOAc = 4:1) to provide the title compound as a white solid in 60% yield (45.7 mg).

**<sup>1</sup>H NMR** (500 MHz,  $\text{CDCl}_3$ )  $\delta$  8.39 (d,  $J = 8.0$  Hz, 1H), 7.93 (d,  $J = 8.2$  Hz, 1H), 7.88 – 7.84 (m, 1H), 7.67 (d,  $J = 6.9$  Hz, 1H), 7.58 – 7.49 (m, 2H), 7.46 – 7.41 (m, 1H), 6.88 (s, 1H), 3.17 – 3.09 (m, 1H), 1.82 – 1.73 (m, 1H), 1.70 – 1.60 (m, 1H), 1.50 – 1.39 (m, 2H), 1.39 – 1.32 (m, 4H), 1.30 (s, 12H), 0.89 (t,  $J = 7.0$  Hz, 3H);

**<sup>13</sup>C NMR** (126 MHz,  $\text{CDCl}_3$ )  $\delta$  172.1, 133.7, 132.0, 130.4, 130.0, 128.5, 127.6, 126.7, 126.4, 125.5, 124.7, 82.4, 32.0, 31.3, 27.6, 25.3, 25.2, 22.7, 14.2;

**<sup>11</sup>B NMR** (160 MHz,  $\text{CDCl}_3$ )  $\delta$  23.9;

**HRMS** (ESI) calcd. for  $\text{C}_{23}\text{H}_{33}\text{BNO}_3$   $[\text{M}+\text{H}]^+$   $m/z$  382.2548, found 382.2542;

**IR** (neat,  $\text{cm}^{-1}$ ) 3176, 3065, 2931, 1579, 1532, 1191, 1127, 779;

**m.p.** 53 – 55 ° C

$[\alpha]_D^{25} = -34.4$  ( $c = 0.62$ ,  $\text{CHCl}_3$ );

**HPLC analysis:** the *ee* (84%) was determined using a CHIRALPAK<sup>®</sup> ID-3 column, 5%

EtOH in hexane, 1.0 mL/min, 240 nm UV detector,  $t_R$  (major) = 4.7 min,  $t_R$  (minor) = 5.1 min.

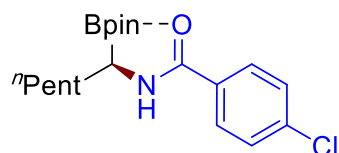

**(R)-4-Chloro-N-(1-(4,4,5,5-tetramethyl-1,3,2-dioxaborolan-2-yl)hexyl)benzamide**

(Figure 4, **4f**). From (*E*)-2-(hex-1-en-1-yl)-4,4,5,5-tetramethyl-1,3,2-dioxaborolane (**1a**) (42.0 mg, 0.20 mmol, 1.0 equiv) and 3-(4-chlorophenyl)-1,4,2-dioxazol-5-one (**2f**) (59.3 mg, 0.30 mmol, 1.5 equiv), the title compound was prepared following the general procedure **A** using NiCl<sub>2</sub>·6H<sub>2</sub>O (4.8 mg, 10 mol%), **L\*** (8.0 mg, 12 mol%), LiI (13.4 mg, 0.10 mmol, 0.50 equiv), H<sub>2</sub>O (1.8 μL, 0.10 mmol, 0.50 equiv), (EtO)<sub>3</sub>SiH (92 μL, 0.50 mmol, 2.5 equiv), anhydrous DMA (1.0 mL). The reaction mixture was stirred for 20 h at 25 °C. The crude material was purified by flash column chromatography (petroleum ether/EtOAc = 2:1) to provide the title compound as a colorless oil in 62% yield (45.7 mg).

**<sup>1</sup>H NMR** (500 MHz, CDCl<sub>3</sub>) δ 8.57 (s, 1H), 7.74 (d, *J* = 8.6 Hz, 2H), 7.29 (d, *J* = 8.6 Hz, 2H), 2.85 – 2.78 (m, 1H), 1.77 – 1.64 (m, 1H), 1.62 – 1.51 (m, 1H), 1.46 – 1.36 (m, 2H), 1.35 – 1.28 (m, 4H), 1.26 (s, 12H), 0.88 (t, *J* = 7.0 Hz, 3H);

**<sup>13</sup>C NMR** (126 MHz, CDCl<sub>3</sub>) δ 169.5, 139.6, 129.7, 128.9, 126.6, 81.7, 32.1, 31.3, 27.5, 25.3, 25.2, 22.7, 14.2;

**<sup>11</sup>B NMR** (160 MHz, CDCl<sub>3</sub>) δ 19.1;

**HRMS** (ESI) calcd. for C<sub>19</sub>H<sub>29</sub>BClNaO<sub>3</sub> [M+Na]<sup>+</sup> *m/z* 388.1821, found 388.1811;

**IR** (neat, cm<sup>-1</sup>) 3066, 2969, 2927, 1606, 1485, 1092;

**[α]<sub>D</sub><sup>25</sup>** = -47.6 (*c* = 1.09, CHCl<sub>3</sub>);

**HPLC analysis:** the *ee* (96%) was determined using a CHIRALPAK<sup>®</sup> AS-H column, 3% *i*PrOH in hexane, 0.4 mL/min, 254 nm UV detector,  $t_R$  (minor) = 9.3 min,  $t_R$  (major) = 10.3 min.

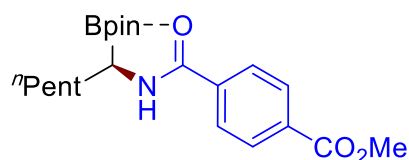

**Methyl** **(R)-4-((1-(4,4,5,5-tetramethyl-1,3,2-dioxaborolan-2-yl)hexyl)carbamoyl)benzoate** (Figure 4, **4g**). From (*E*)-2-(hex-1-en-1-yl)-4,4,5,5-tetramethyl-1,3,2-dioxaborolane (**1a**) (42.0 mg, 0.20 mmol, 1.0 equiv) and methyl 4-(5-oxo-1,4,2-dioxazol-3-yl)benzoate (**2g**) (66.4 mg, 0.30 mmol, 1.5 equiv), the title compound was prepared following the general procedure **A** using NiCl<sub>2</sub>·6H<sub>2</sub>O (4.8 mg, 10 mol%), **L\*** (8.0 mg, 12 mol%), LiI (13.4 mg, 0.10 mmol, 0.50 equiv), MeOH (4.0 μL, 0.10 mmol, 0.50 equiv, instead of H<sub>2</sub>O), (EtO)<sub>3</sub>SiH (92 μL, 0.50 mmol, 2.5 equiv), anhydrous DMA (1.0 mL). The reaction mixture was stirred for 20 h at 25 °C. The crude material was purified by flash column chromatography (petroleum ether/EtOAc = 2:1) to provide the title compound as a white solid in 62% yield (48.4 mg).

**<sup>1</sup>H NMR** (500 MHz, CDCl<sub>3</sub>) δ 8.18 (s, 1H), 7.98 (d, *J* = 8.4 Hz, 2H), 7.85 (d, *J* = 8.5 Hz, 2H), 3.93 (s, 3H), 3.00 – 2.91 (m, 1H), 1.77 – 1.68 (m, 1H), 1.65 – 1.53 (m, 1H), 1.48 – 1.37 (m, 2H), 1.35 – 1.24 (m, 16H), 0.88 (t, *J* = 7.0 Hz, 3H);

**<sup>13</sup>C NMR** (126 MHz, CDCl<sub>3</sub>) δ 169.2, 166.1, 133.8, 133.3, 129.8, 128.1, 82.1, 52.6, 32.1, 31.2, 27.4, 25.3, 25.2, 22.7, 14.2;

**<sup>11</sup>B NMR** (160 MHz, CDCl<sub>3</sub>) δ 21.8;

**HRMS** (ESI) calcd. for C<sub>21</sub>H<sub>33</sub>BNO<sub>5</sub> [M+H]<sup>+</sup> *m/z* 390.2446, found 390.2436;

**IR** (neat, cm<sup>-1</sup>) 2925, 2856, 1730, 1603, 1278, 1107, 725;

**m.p.** 116 – 118 °C;

**[α]<sub>D</sub><sup>25</sup>** = –27.8 (*c* = 1.01, CHCl<sub>3</sub>);

**HPLC analysis:** the *ee* (93%) was determined using two connected CHIRALCEL<sup>®</sup> OD-H columns, 3% *i*PrOH in hexane, 0.8 mL/min, 254 nm UV detector, *t<sub>R</sub>* (major) = 15.7 min, *t<sub>R</sub>* (minor) = 18.7 min.

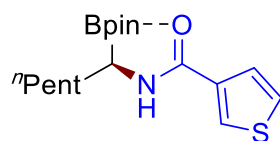



**(R)-N-(1-(4,4,5,5-Tetramethyl-1,3,2-dioxaborolan-2-yl)hexyl)thiophene-3-carboxamide** (Figure 4, **4h**). From (*E*)-2-(hex-1-en-1-yl)-4,4,5,5-tetramethyl-1,3,2-dioxaborolane (**1a**) (42.0 mg, 0.20 mmol, 1.0 equiv) and 3-(thiophen-3-yl)-1,4,2-dioxazol-5-one (**2h**) (50.7 mg, 0.30 mmol, 1.5 equiv), the title compound was prepared following the general procedure **A** using NiCl<sub>2</sub>·6H<sub>2</sub>O (4.8 mg, 10 mol%), **L\*** (8.0 mg, 12 mol%), LiI (13.4 mg, 0.10 mmol, 0.50 equiv), H<sub>2</sub>O (1.8 μL, 0.10 mmol, 0.50 equiv), (EtO)<sub>3</sub>SiH (92 μL, 0.50 mmol, 2.5 equiv), anhydrous DMA (1.0 mL). The reaction mixture was stirred for 20 h at 25 °C. The crude material was purified by flash column chromatography (petroleum ether/EtOAc = 3:2) to provide the title compound as a colorless oil in 74% yield (49.7 mg).

<sup>1</sup>H NMR (500 MHz, CDCl<sub>3</sub>) δ 8.65 (s, 1H), 8.09 (dd, *J* = 2.9, 1.0 Hz, 1H), 7.44 (dd, *J* = 5.1, 1.1 Hz, 1H), 7.21 (dd, *J* = 5.1, 3.0 Hz, 1H), 2.76 (t, *J* = 5.9 Hz, 1H), 1.74 – 1.63 (m, 1H), 1.60 – 1.48 (m, 1H), 1.48 – 1.36 (m, 2H), 1.35 – 1.27 (m, 4H), 1.26 (s, 12H), 0.88 (t, *J* = 7.0 Hz, 3H);

<sup>13</sup>C NMR (126 MHz, CDCl<sub>3</sub>) δ 166.4, 132.3, 130.5, 126.6, 126.6, 81.3, 32.1, 31.3, 27.5, 25.3, 25.2, 22.7, 14.2;

<sup>11</sup>B NMR (160 MHz, CDCl<sub>3</sub>) δ 17.3;

HRMS (ESI) calcd. for C<sub>17</sub>H<sub>28</sub>BNNaO<sub>3</sub>S [M+Na]<sup>+</sup> *m/z* 360.1775, found 360.1765;

IR (neat, cm<sup>-1</sup>) 3119, 2965, 2925, 1594, 1098;

[α]<sub>D</sub><sup>25</sup> = -51.0 (c = 1.01, CHCl<sub>3</sub>);

HPLC analysis: the *ee* (98%) was determined using a CHIRALCEL<sup>®</sup> OD-H column, 2% *i*PrOH in hexane, 1.0 mL/min, 254 nm UV detector, *t*<sub>R</sub> (minor) = 6.1 min, *t*<sub>R</sub> (major) = 8.4 min.

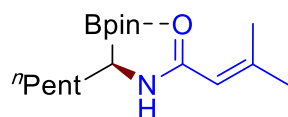

**(R)-3-Methyl-N-(1-(4,4,5,5-tetramethyl-1,3,2-dioxaborolan-2-yl)hexyl)but-2-enamide** (Figure 4, **4i**). From (*E*)-2-(hex-1-en-1-yl)-4,4,5,5-tetramethyl-1,3,2-dioxaborolane (**1a**) (42.0 mg, 0.20 mmol, 1.0 equiv) and 3-(2-methylprop-1-en-1-yl)-

1,4,2-dioxazol-5-one (**2i**) (42.3 mg, 0.30 mmol, 1.5 equiv), the title compound was prepared following the general procedure **A** using NiCl<sub>2</sub>·6H<sub>2</sub>O (4.8 mg, 10 mol%), **L\*** (8.0 mg, 12 mol%), LiI (13.4 mg, 0.10 mmol, 0.50 equiv), H<sub>2</sub>O (1.8 μL, 0.10 mmol, 0.50 equiv), (EtO)<sub>3</sub>SiH (92 μL, 0.50 mmol, 2.5 equiv), anhydrous DMA (1.0 mL). The reaction mixture was stirred for 20 h at 25 °C. The crude material was purified by flash column chromatography (petroleum ether/EtOAc = 3:2) to provide the title compound as a colorless oil in 63% yield (39.2 mg).

<sup>1</sup>H NMR (500 MHz, CDCl<sub>3</sub>) δ 8.65 (s, 1H), 5.74 (s, 1H), 2.40 – 2.33 (m, 1H), 2.18 (s, 3H), 1.87 (s, 3H), 1.60 – 1.51 (m, 1H), 1.47 – 1.39 (m, 1H), 1.36 – 1.24 (m, 6H), 1.21 (s, 6H), 1.19 (s, 6H), 0.87 (t, *J* = 6.9 Hz, 3H);

<sup>13</sup>C NMR (126 MHz, CDCl<sub>3</sub>) δ 170.8, 158.2, 112.1, 80.2, 32.2, 31.5, 28.3, 28.0, 25.5, 25.1, 22.8, 21.0, 14.3;

<sup>11</sup>B NMR (160 MHz, CDCl<sub>3</sub>) δ 14.1;

HRMS (ESI) calcd. for C<sub>17</sub>H<sub>33</sub>BNO<sub>3</sub> [M+H]<sup>+</sup> *m/z* 310.2548, found 310.2543;

IR (neat, cm<sup>-1</sup>) 3176, 2965, 2927, 1665, 1573, 1156, 1107;

[α]<sub>D</sub><sup>25</sup> = -79.0 (c = 1.00, CHCl<sub>3</sub>);

**HPLC analysis:** the *ee* (97%) was determined using a CHIRALPAK<sup>®</sup> AD-H column, 5% *i*PrOH in hexane, 1.0 mL/min, 240 nm UV detector, *t*<sub>R</sub> (major) = 5.2 min, *t*<sub>R</sub> (minor) = 7.2 min.

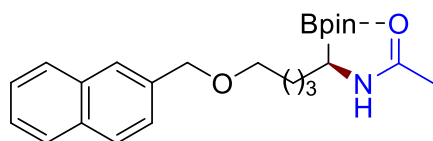

**(R)-N-(5-(Naphthalen-2-ylmethoxy)-1-(4,4,5,5-tetramethyl-1,3,2-dioxaborolan-2-yl)pentyl)acetamide** (Figure 4, **4j**). From (*E*)-4,4,5,5-tetramethyl-2-(5-(naphthalen-2-ylmethoxy)pent-1-en-1-yl)-1,3,2-dioxaborolane (**1t**) (70.5 mg, 0.20 mmol, 1.0 equiv) and 3-methyl-1,4,2-dioxazol-5-one (**2j**) (30.3 mg, 0.30 mmol, 1.5 equiv), the title compound was prepared following the general procedure **A** using NiCl<sub>2</sub>·6H<sub>2</sub>O (4.8 mg, 10 mol%), **L\*** (8.0 mg, 12 mol%), LiI (13.4 mg, 0.10 mmol, 0.50 equiv), H<sub>2</sub>O (1.8 μL, 0.10 mmol, 0.50 equiv), (EtO)<sub>3</sub>SiH (92 μL, 0.50 mmol, 2.5 equiv), anhydrous DMA

(1.0 mL). The reaction mixture was stirred for 20 h at 25 °C. The crude material was purified by flash column chromatography (CH<sub>2</sub>Cl<sub>2</sub>/MeOH = 10:1) to provide the title compound as a colorless oil in 47% yield (38.3 mg).

<sup>1</sup>H NMR (500 MHz, CDCl<sub>3</sub>) δ 8.01 (s, 1H), 7.84 – 7.78 (m, 3H), 7.75 (s, 1H), 7.49 – 7.41 (m, 3H), 4.63 (s, 2H), 3.56 – 3.47 (m, 2H), 2.55 – 2.46 (m, 1H), 1.94 (s, 3H), 1.74 – 1.56 (m 3H), 1.56 – 1.37 (m, 3H), 1.17 (s, 12H);

<sup>13</sup>C NMR (126 MHz, CDCl<sub>3</sub>) δ 175.0, 136.1, 133.4, 133.1, 128.3, 128.0, 127.8, 126.6, 126.3, 126.0, 126.0, 80.7, 73.2, 70.6, 30.8, 29.6, 25.4, 25.2, 24.8, 18.1;

<sup>11</sup>B NMR (160 MHz, CDCl<sub>3</sub>) δ 16.6;

HRMS (ESI) calcd. for C<sub>24</sub>H<sub>34</sub>BNNaO<sub>4</sub> [M+Na]<sup>+</sup> m/z 434.2473, found 434.2461;

IR (neat, cm<sup>-1</sup>) 3053, 2969, 2927, 1609, 1557, 1154, 1097;

[α]<sub>D</sub><sup>25</sup> = -59.4 (c = 1.04, CHCl<sub>3</sub>);

**HPLC analysis:** the *ee* (97%) was determined using a CHIRALCEL<sup>®</sup> OD-H column, 5% *i*PrOH in hexane, 1.0 mL/min, 254 nm UV detector, *t*<sub>R</sub> (minor) = 10.0 min, *t*<sub>R</sub> (major) = 12.1 min.

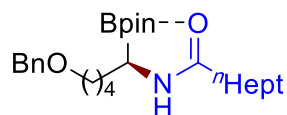

**(R)-N-(5-(Benzyloxy)-1-(4,4,5,5-tetramethyl-1,3,2-dioxaborolan-2-**

**yl)pentyl)octanamide** (Figure 4, **4k**). From (*E*)-2-(5-(benzyloxy)pent-1-en-1-yl)-4,4,5,5-tetramethyl-1,3,2-dioxaborolane (**1i**) (60.4 mg, 0.20 mmol, 1.0 equiv) and 3-heptyl-1,4,2-dioxazol-5-one (**2k**) (55.6 mg, 0.30 mmol, 1.5 equiv), the title compound was prepared following the general procedure **A** using NiCl<sub>2</sub>·6H<sub>2</sub>O (4.8 mg, 10 mol%), **L\*** (8.0 mg, 12 mol%), LiI (13.4 mg, 0.10 mmol, 0.50 equiv), H<sub>2</sub>O (1.8 μL, 0.10 mmol, 0.50 equiv), (EtO)<sub>3</sub>SiH (92 μL, 0.50 mmol, 2.5 equiv), anhydrous DMA (1.0 mL). The reaction mixture was stirred for 20 h at 25 °C. The crude material was purified by flash column chromatography (petroleum ether/EtOAc = 1:1) to provide the title compound as a colorless oil in 63% yield (56.4 mg).

<sup>1</sup>H NMR (500 MHz, CDCl<sub>3</sub>) δ 7.38 (s, 1H), 7.35 – 7.30 (m, 4H), 7.30 – 7.26 (m, 1H),

4.48 (s, 2H), 3.53 – 3.43 (m, 2H), 2.60 – 2.52 (m, 1H), 2.27 – 2.14 (m, 2H), 1.71 – 1.52 (m, 5H), 1.52 – 1.38 (m, 3H), 1.32 – 1.22 (m, 8H), 1.20 (s, 12H), 0.87 (t,  $J = 7.0$  Hz, 3H);

$^{13}\text{C}$  NMR (126 MHz,  $\text{CDCl}_3$ )  $\delta$  178.1, 138.6, 128.5, 127.8, 127.7, 80.8, 73.1, 70.6, 31.9, 31.7, 30.8, 29.6, 29.2, 28.9, 25.3, 25.1, 25.1, 24.8, 22.7, 14.2;

$^{11}\text{B}$  NMR (160 MHz,  $\text{CDCl}_3$ )  $\delta$  16.6;

HRMS (ESI) calcd. for  $\text{C}_{26}\text{H}_{44}\text{BNNaO}_4$   $[\text{M}+\text{Na}]^+$   $m/z$  468.3256, found 468.3246;

IR (neat,  $\text{cm}^{-1}$ ) 2963, 2925, 1603, 1155, 1099;

$[\alpha]_{\text{D}}^{25} = -50.0$  ( $c = 1.08$ ,  $\text{CHCl}_3$ );

**HPLC analysis:** the *ee* (97%) was determined using a CHIRALCEL<sup>®</sup> OD-H column, 8% *i*PrOH in hexane, 0.5 mL/min, 210 nm UV detector,  $t_{\text{R}}$  (major) = 9.6 min,  $t_{\text{R}}$  (minor) = 10.6 min.

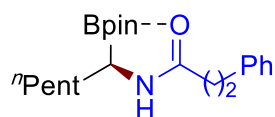

**(*R*)-3-Phenyl-*N*-(1-(4,4,5,5-tetramethyl-1,3,2-dioxaborolan-2-**

**yl)hexyl)propanamide** (Figure 4, **4l**). From (*E*)-2-(hex-1-en-1-yl)-4,4,5,5-tetramethyl-1,3,2-dioxaborolane (**1a**) (42.0 mg, 0.20 mmol, 1.0 equiv) and 3-phenethyl-1,4,2-dioxazol-5-one (**2l**) (57.4 mg, 0.30 mmol, 1.5 equiv), the title compound was prepared following the general procedure **A** using  $\text{NiCl}_2 \cdot 6\text{H}_2\text{O}$  (4.8 mg, 10 mol%), **L\*** (8.0 mg, 12 mol%), LiI (13.4 mg, 0.10 mmol, 0.50 equiv),  $\text{H}_2\text{O}$  (1.8  $\mu\text{L}$ , 0.10 mmol, 0.50 equiv),  $(\text{EtO})_3\text{SiH}$  (92  $\mu\text{L}$ , 0.50 mmol, 2.5 equiv), anhydrous DMA (1.0 mL). The reaction mixture was stirred for 20 h at 25 °C. The crude material was purified by flash column chromatography (petroleum ether/EtOAc = 2:3) to provide the title compound as a colorless oil in 61% yield (43.9 mg).

$^1\text{H}$  NMR (500 MHz,  $\text{CDCl}_3$ )  $\delta$  7.43 (s, 1H), 7.30 – 7.24 (m, 2H), 7.20 (t,  $J = 7.3$  Hz, 1H), 7.15 (d,  $J = 7.4$  Hz, 2H), 2.91 (t,  $J = 7.8$  Hz, 2H), 2.64 – 2.51 (m, 3H), 1.61 – 1.51 (m, 1H), 1.39 – 1.32 (m, 1H), 1.31 – 1.22 (m, 6H), 1.21 (s, 12H), 0.87 (t,  $J = 6.8$  Hz, 3H);

$^{13}\text{C}$  NMR (126 MHz,  $\text{CDCl}_3$ )  $\delta$  176.3, 139.8, 128.8, 128.4, 126.7, 81.1, 34.1, 32.0, 31.2, 31.2, 27.8, 25.4, 25.2, 22.7, 14.2;

$^{11}\text{B}$  NMR (160 MHz,  $\text{CDCl}_3$ )  $\delta$  19.2;

HRMS (ESI) calcd. for  $\text{C}_{21}\text{H}_{35}\text{BNO}_3$   $[\text{M}+\text{H}]^+$   $m/z$  360.2705, found 360.2696;

IR (neat,  $\text{cm}^{-1}$ ) 3168, 2961, 2926, 1604, 1550, 1155, 1109;

$[\alpha]_{\text{D}}^{25} = -43.0$  ( $c = 0.91$ ,  $\text{CHCl}_3$ );

HPLC analysis: the *ee* (97%) was determined using a CHIRALCEL<sup>®</sup> OD-H column, 5% *i*PrOH in hexane, 1.0 mL/min, 210 nm UV detector,  $t_{\text{R}}$  (minor) = 5.7 min,  $t_{\text{R}}$  (major) = 6.5 min.

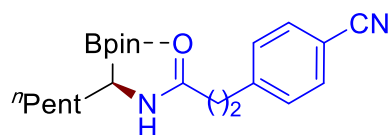

**(*R*)-3-(4-Cyanophenyl)-*N*-(1-(4,4,5,5-tetramethyl-1,3,2-dioxaborolan-2-yl)hexyl)propanamide** (Figure 4, **4m**). From (*E*)-2-(hex-1-en-1-yl)-4,4,5,5-tetramethyl-1,3,2-dioxaborolane (**1a**) (42.0 mg, 0.20 mmol, 1.0 equiv) and 4-(2-(5-oxo-1,4,2-dioxazol-3-yl)ethyl)benzonitrile (**2m**) (64.9 mg, 0.30 mmol, 1.5 equiv), the title compound was prepared following the general procedure **A** using  $\text{NiCl}_2 \cdot 6\text{H}_2\text{O}$  (4.8 mg, 10 mol%), **L\*** (8.0 mg, 12 mol%), LiI (13.4 mg, 0.10 mmol, 0.50 equiv),  $\text{H}_2\text{O}$  (1.8  $\mu\text{L}$ , 0.10 mmol, 0.50 equiv),  $(\text{EtO})_3\text{SiH}$  (92  $\mu\text{L}$ , 0.50 mmol, 2.5 equiv), anhydrous DMA (1.0 mL). The reaction mixture was stirred for 20 h at 25 °C. The crude material was purified by flash column chromatography (petroleum ether/EtOAc = 2:3) to provide the title compound as a colorless oil in 48% yield (36.8 mg).

$^1\text{H}$  NMR (500 MHz,  $\text{CDCl}_3$ )  $\delta$  7.57 (d,  $J = 8.2$  Hz, 2H), 7.31 (d,  $J = 8.2$  Hz, 2H), 6.41 (s, 1H), 3.02 (t,  $J = 7.5$  Hz, 2H), 2.83 – 2.74 (m, 1H), 2.62 – 2.48 (m, 2H), 1.61 – 1.51 (m, 1H), 1.44 – 1.35 (m, 1H), 1.31 – 1.24 (m, 6H), 1.23 (s, 12H), 0.87 (t,  $J = 6.8$  Hz, 3H);

$^{13}\text{C}$  NMR (126 MHz,  $\text{CDCl}_3$ )  $\delta$  174.0, 145.9, 132.5, 129.4, 119.0, 110.6, 82.2, 34.9, 31.9, 31.4, 31.1, 27.4, 25.2, 25.1, 22.7, 14.2;

$^{11}\text{B}$  NMR (160 MHz,  $\text{CDCl}_3$ )  $\delta$  23.7;

**HRMS** (ESI) calcd. for C<sub>22</sub>H<sub>34</sub>BN<sub>2</sub>O<sub>3</sub> [M+H]<sup>+</sup> m/z 385.2657, found 385.2648;

**IR** (neat, cm<sup>-1</sup>) 3173, 2964, 2927, 2229, 1606, 1155, 1109;

[α]<sub>D</sub><sup>25</sup> = -19.1 (c = 0.58, CHCl<sub>3</sub>);

**HPLC analysis:** the *ee* (95%) was determined using a CHIRALPAK<sup>®</sup> AD-H column, 10% *i*PrOH in hexane, 1.0 mL/min, 220 nm UV detector, *t*<sub>R</sub> (major) = 4.1 min, *t*<sub>R</sub> (minor) = 5.0 min.

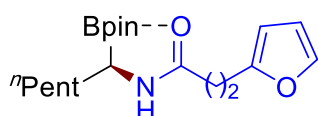

**(R)-3-(Furan-2-yl)-N-(1-(4,4,5,5-tetramethyl-1,3,2-dioxaborolan-2-yl)hexyl)propanamide** (Figure 4, **4n**). From (*E*)-2-(hex-1-en-1-yl)-4,4,5,5-tetramethyl-1,3,2-dioxaborolane (**1a**) (42.0 mg, 0.20 mmol, 1.0 equiv) and 3-(2-(furan-2-yl)ethyl)-1,4,2-dioxazol-5-one (**2n**) (54.3 mg, 0.30 mmol, 1.5 equiv), the title compound was prepared following the general procedure **A** using NiCl<sub>2</sub>·6H<sub>2</sub>O (4.8 mg, 10 mol%), **L\*** (8.0 mg, 12 mol%), LiI (13.4 mg, 0.10 mmol, 0.50 equiv), H<sub>2</sub>O (1.8 μL, 0.10 mmol, 0.50 equiv), (EtO)<sub>3</sub>SiH (92 μL, 0.50 mmol, 2.5 equiv), anhydrous DMA (1.0 mL). The reaction mixture was stirred for 20 h at 25 °C. The crude material was purified by flash column chromatography (petroleum ether/EtOAc = 2:1) to provide the title compound as a yellow oil in 58% yield (40.6 mg).

**<sup>1</sup>H NMR** (500 MHz, CDCl<sub>3</sub>) δ 7.34 – 7.26 (m, 2H), 6.26 (dd, *J* = 3.1, 1.9 Hz, 1H), 6.04 (d, *J* = 2.7 Hz, 1H), 2.95 (t, *J* = 7.6 Hz, 2H), 2.69 – 2.55 (m, 3H), 1.62 – 1.52 (m, 1H), 1.43 – 1.35 (m, 1H), 1.33 – 1.23 (m, 6H), 1.21 (s, 12H), 0.87 (t, *J* = 6.8 Hz, 3H);

**<sup>13</sup>C NMR** (126 MHz, CDCl<sub>3</sub>) δ 175.6, 153.3, 141.6, 110.5, 106.2, 81.3, 32.0, 31.3, 31.2, 27.7, 25.3, 25.1, 23.7, 22.7, 14.2;

**<sup>11</sup>B NMR** (160 MHz, CDCl<sub>3</sub>) δ 19.9;

**HRMS** (ESI) calcd. for C<sub>19</sub>H<sub>33</sub>BNO<sub>4</sub> [M+H]<sup>+</sup> m/z 350.2497, found 350.2491;

**IR** (neat, cm<sup>-1</sup>) 3168, 2964, 2926, 1605, 1552, 1154, 1109, 729;

[α]<sub>D</sub><sup>25</sup> = -37.7 (c = 1.04, CHCl<sub>3</sub>);

**HPLC analysis:** the *ee* (96%) was determined using a CHIRALPAK<sup>®</sup> AD-H column,

5% *i*PrOH in hexane, 0.8 mL/min, 220 nm UV detector,  $t_R$  (major) = 5.6 min,  $t_R$  (minor) = 7.5 min.

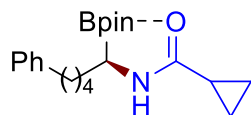

**(*R*)-*N*-(5-Phenyl-1-(4,4,5,5-tetramethyl-1,3,2-dioxaborolan-2-**

**yl)pentyl)cyclopropanecarboxamide** (Figure 4, **4o**). From (*E*)-4,4,5,5-tetramethyl-2-(5-phenylpent-1-en-1-yl)-1,3,2-dioxaborolane (**1c**) (54.4 mg, 0.20 mmol, 1.0 equiv) and 3-cyclopropyl-1,4,2-dioxazol-5-one (**2o**) (38.1 mg, 0.30 mmol, 1.5 equiv), the title compound was prepared following the general procedure **A** using NiCl<sub>2</sub>·6H<sub>2</sub>O (4.8 mg, 10 mol%), **L**\* (8.0 mg, 12 mol%), LiI (13.4 mg, 0.10 mmol, 0.50 equiv), H<sub>2</sub>O (1.8 μL, 0.10 mmol, 0.50 equiv), (EtO)<sub>3</sub>SiH (92 μL, 0.50 mmol, 2.5 equiv), anhydrous DMA (1.0 mL). The reaction mixture was stirred for 20 h at 25 °C. The crude material was purified by flash column chromatography (petroleum ether/EtOAc = 1:1) to provide the title compound as a colorless oil in 55% yield (39.3 mg).

<sup>1</sup>H NMR (500 MHz, CDCl<sub>3</sub>) δ 8.32 (s, 1H), 7.28 – 7.22 (m, 2H), 7.19 – 7.12 (m, 3H), 2.67 – 2.53 (m, 2H), 2.52 – 2.45 (m, 1H), 1.70 – 1.52 (m, 4H), 1.52 – 1.32 (m, 3H), 1.31 – 1.21 (m, 1H), 1.16 (s, 6H), 1.15 (s, 6H), 1.12 – 1.06 (m, 1H), 0.95 – 0.85 (m, 2H);

<sup>13</sup>C NMR (126 MHz, CDCl<sub>3</sub>) δ 178.6, 142.8, 128.5, 128.4, 125.8, 80.5, 36.0, 31.7, 31.3, 27.9, 25.5, 25.1, 10.9, 8.6;

<sup>11</sup>B NMR (160 MHz, CDCl<sub>3</sub>) δ 16.2;

HRMS (ESI) calcd. for C<sub>21</sub>H<sub>33</sub>BNO<sub>3</sub> [M+H]<sup>+</sup>  $m/z$  358.2548, found 358.2538;

IR (neat, cm<sup>-1</sup>) 3206, 3062, 2929, 1603, 1548, 1154, 1115, 734;

[α]<sub>D</sub><sup>25</sup> = -61.3 (c = 0.97, CHCl<sub>3</sub>);

**HPLC analysis:** the *ee* (98%) was determined using a CHIRALPAK<sup>®</sup> AD-H column, 5% *i*PrOH in hexane, 1.0 mL/min, 220 nm UV detector,  $t_R$  (major) = 4.3 min,  $t_R$  (minor) = 6.4 min.

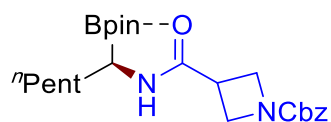

**Benzyl** **(R)-3-(((1-(4,4,5,5-tetramethyl-1,3,2-dioxaborolan-2-yl)hexyl)carbamoyl)azetidine-1-carboxylate** (Figure 4, **4p**). From (*E*)-2-(hex-1-en-1-yl)-4,4,5,5-tetramethyl-1,3,2-dioxaborolane (**1a**) (42.0 mg, 0.20 mmol, 1.0 equiv) and benzyl 3-(5-oxo-1,4,2-dioxazol-3-yl)azetidine-1-carboxylate (**2p**) (82.9 mg, 0.30 mmol, 1.5 equiv), the title compound was prepared following the general procedure **A** using NiCl<sub>2</sub>·6H<sub>2</sub>O (4.8 mg, 10 mol%), **L\*** (8.0 mg, 12 mol%), LiI (13.4 mg, 0.10 mmol, 0.50 equiv), H<sub>2</sub>O (1.8 μL, 0.10 mmol, 0.50 equiv), (EtO)<sub>3</sub>SiH (92 μL, 0.50 mmol, 2.5 equiv), anhydrous DMA (1.0 mL). The reaction mixture was stirred for 20 h at 25 °C. The crude material was purified by flash column chromatography (CH<sub>2</sub>Cl<sub>2</sub>/MeOH = 30:1) to provide the title compound as a colorless oil in 47% yield (42.0 mg).

<sup>1</sup>H NMR (500 MHz, CDCl<sub>3</sub>) δ 7.36 – 7.29 (m, 5H), 6.14 (s, 1H), 5.08 (s, 2H), 4.24 – 4.14 (m, 2H), 4.11 (t, *J* = 8.5 Hz, 2H), 3.29 – 3.20 (m, 1H), 3.06 – 2.96 (m, 1H), 1.67 – 1.56 (m, 1H), 1.54 – 1.42 (m, 1H), 1.33 – 1.26 (m, 6H), 1.24 (s, 6H), 1.24 (s, 6H), 0.87 (t, *J* = 6.6 Hz, 3H);

<sup>13</sup>C NMR (126 MHz, CDCl<sub>3</sub>) δ 172.9, 156.4, 136.6, 128.6, 128.2, 128.1, 83.2, 66.9, 52.0, 32.5, 31.9, 31.0, 27.1, 25.1, 25.1, 22.6, 14.1;

<sup>11</sup>B NMR (160 MHz, CDCl<sub>3</sub>) δ 27.9;

**HRMS** (ESI) calcd. for C<sub>24</sub>H<sub>37</sub>BN<sub>2</sub>NaO<sub>5</sub> [M+Na]<sup>+</sup> *m/z* 467.2688, found 467.2678;

**IR** (neat, cm<sup>-1</sup>) 3210, 2959, 2829, 1711, 1605, 1352, 1132;

[α]<sub>D</sub><sup>25</sup> = -13.4 (c = 0.95, CHCl<sub>3</sub>);

**HPLC analysis:** the *ee* (96%) was determined using a CHIRALCEL<sup>®</sup> OD-H column, 5% *i*PrOH in hexane, 1.0 mL/min, 210 nm UV detector, *t*<sub>R</sub> (minor) = 9.9 min, *t*<sub>R</sub> (major) = 11.7 min.

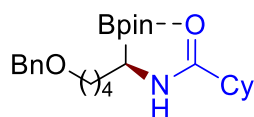

**(R)-N-(5-(Benzyloxy)-1-(4,4,5,5-tetramethyl-1,3,2-dioxaborolan-2-**



**yl)pentyl)cyclohexanecarboxamide** (Figure 4, **4q**). From (*E*)-2-(5-(benzyloxy)pent-1-en-1-yl)-4,4,5,5-tetramethyl-1,3,2-dioxaborolane (**1i**) (60.4 mg, 0.20 mmol, 1.0 equiv) and 3-cyclohexyl-1,4,2-dioxazol-5-one (**2q**) (50.8 mg, 0.30 mmol, 1.5 equiv), the title compound was prepared following the general procedure **A** using NiCl<sub>2</sub>·6H<sub>2</sub>O (4.8 mg, 10 mol%), **L\*** (8.0 mg, 12 mol%), LiI (13.4 mg, 0.10 mmol, 0.50 equiv), H<sub>2</sub>O (1.8 μL, 0.10 mmol, 0.50 equiv), (EtO)<sub>3</sub>SiH (92 μL, 0.50 mmol, 2.5 equiv), anhydrous DMA (1.0 mL). The reaction mixture was stirred for 20 h at 25 °C. The crude material was purified by flash column chromatography (petroleum ether/EtOAc = 1:1) to provide the title compound as a colorless oil in 65% yield (55.8 mg).

<sup>1</sup>H NMR (500 MHz, CDCl<sub>3</sub>) δ 7.35 – 7.30 (m, 4H), 7.30 – 7.26 (m, 1H), 7.10 (s, 1H), 4.48 (s, 2H), 3.49 (t, *J* = 6.3 Hz, 2H), 2.59 – 2.50 (m, 1H), 2.25 – 2.15 (m, 1H), 1.89 – 1.81 (m, 2H), 1.81 – 1.71 (m, 2H), 1.70 – 1.56 (m, 4H), 1.50 – 1.39 (m, 3H), 1.39 – 1.29 (m, 2H), 1.29 – 1.21 (m, 3H), 1.19 (s, 12H);

<sup>13</sup>C NMR (126 MHz, CDCl<sub>3</sub>) δ 180.9, 138.6, 128.5, 127.8, 127.7, 80.6, 73.1, 70.6, 40.5, 30.8, 29.6, 28.9, 28.8, 25.6, 25.4, 25.4, 25.4, 25.1, 24.8;

<sup>11</sup>B NMR (160 MHz, CDCl<sub>3</sub>) δ 16.0;

HRMS (ESI) calcd. for C<sub>25</sub>H<sub>40</sub>BNNaO<sub>4</sub> [M+Na]<sup>+</sup> *m/z* 452.2943, found 452.2933;

IR (neat, cm<sup>-1</sup>) 3198, 2930, 2855, 1599, 1098, 733;

[α]<sub>D</sub><sup>25</sup> = -55.7 (c = 1.05, CHCl<sub>3</sub>);

**HPLC analysis:** the *ee* (94%) was determined using a CHIRALPAK<sup>®</sup> AD-H column, 5% *i*PrOH in hexane, 1.0 mL/min, 220 nm UV detector, *t*<sub>R</sub> (major) = 4.6 min, *t*<sub>R</sub> (minor) = 8.4 min.

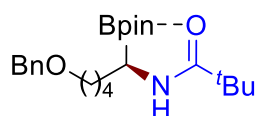

**(*R*)-*N*-(5-(Benzyloxy)-1-(4,4,5,5-tetramethyl-1,3,2-dioxaborolan-2-**

**yl)pentyl)pivalamide** (Figure 4, **4r**). From (*E*)-2-(5-(benzyloxy)pent-1-en-1-yl)-4,4,5,5-tetramethyl-1,3,2-dioxaborolane (**1i**) (60.4 mg, 0.20 mmol, 1.0 equiv) and 3-(*tert*-butyl)-1,4,2-dioxazol-5-one (**2r**) (42.9 mg, 0.30 mmol, 1.5 equiv), the title

compound was prepared following the general procedure **A** using NiCl<sub>2</sub>·6H<sub>2</sub>O (4.8 mg, 10 mol%), **L**\* (8.0 mg, 12 mol%), LiI (13.4 mg, 0.10 mmol, 0.50 equiv), H<sub>2</sub>O (1.8 μL, 0.10 mmol, 0.50 equiv), (EtO)<sub>3</sub>SiH (92 μL, 0.50 mmol, 2.5 equiv), anhydrous DMA (1.0 mL). The reaction mixture was stirred for 20 h at 25 °C. The crude material was purified by flash column chromatography (petroleum ether/EtOAc = 1:1) to provide the title compound as a colorless oil in 53% yield (42.4 mg).

<sup>1</sup>H NMR (500 MHz, CDCl<sub>3</sub>) δ 7.35 – 7.30 (m, 4H), 7.29 – 7.25 (m, 1H), 6.85 (s, 1H), 4.49 (s, 2H), 3.49 (t, *J* = 6.3 Hz, 2H), 2.59 – 2.51 (m, 1H), 1.72 – 1.56 (m, 3H), 1.51 – 1.38 (m, 3H), 1.21 – 1.16 (m, 21H);

<sup>13</sup>C NMR (126 MHz, CDCl<sub>3</sub>) δ 183.9, 138.6, 128.5, 127.8, 127.7, 80.4, 73.1, 70.5, 35.7, 30.9, 29.6, 26.9, 25.4, 25.2, 24.8;

<sup>11</sup>B NMR (160 MHz, CDCl<sub>3</sub>) δ 15.8;

HRMS (ESI) calcd. for C<sub>23</sub>H<sub>39</sub>BNO<sub>4</sub> [M+H]<sup>+</sup> *m/z* 404.2967, found 404.2956;

IR (neat, cm<sup>-1</sup>) 3204, 2970, 2931, 1581, 1097, 732;

[α]<sub>D</sub><sup>25</sup> = -49.9 (c = 0.99, CHCl<sub>3</sub>);

**HPLC analysis:** the *ee* (83%) was determined using a CHIRALCEL<sup>®</sup> OD-H column, 5% *i*PrOH in hexane, 1.0 mL/min, 220 nm UV detector, *t*<sub>R</sub> (major) = 5.3 min, *t*<sub>R</sub> (minor) = 8.2 min.

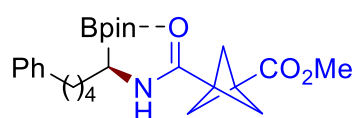

**Methyl (R)-3-((5-phenyl-1-(4,4,5,5-tetramethyl-1,3,2-dioxaborolan-2-yl)pentyl)carbamoyl)bicyclo[1.1.1]pentane-1-carboxylate** (Figure 4, **4s**). From (*E*)-4,4,5,5-tetramethyl-2-(5-phenylpent-1-en-1-yl)-1,3,2-dioxaborolane (**1c**) (54.4 mg, 0.20 mmol, 1.0 equiv) and methyl 3-(5-oxo-1,4,2-dioxazol-3-yl)bicyclo[1.1.1]pentane-1-carboxylate (**2s**) (63.4 mg, 0.30 mmol, 1.5 equiv), the title compound was prepared following the general procedure **A** using NiCl<sub>2</sub>·6H<sub>2</sub>O (4.8 mg, 10 mol%), **L**\* (8.0 mg, 12 mol%), LiI (13.4 mg, 0.10 mmol, 0.50 equiv), H<sub>2</sub>O (1.8 μL, 0.10 mmol, 0.50 equiv), (EtO)<sub>3</sub>SiH (92 μL, 0.50 mmol, 2.5 equiv), anhydrous DMA (1.0 mL). The reaction

mixture was stirred for 20 h at 25 °C. The crude material was purified by flash column chromatography (petroleum ether/EtOAc = 1:1) to provide the title compound as a colorless oil in 53% yield (46.6 mg).

<sup>1</sup>H NMR (500 MHz, CDCl<sub>3</sub>) δ 7.28 – 7.24 (m, 2H), 7.19 – 7.14 (m, 3H), 6.15 (s, 1H), 3.69 (s, 3H), 2.89 – 2.80 (m, 1H), 2.65 – 2.56 (m, 2H), 2.28 (s, 6H), 1.70 – 1.59 (m, 3H), 1.56 – 1.43 (m, 1H), 1.37 – 1.29 (m, 2H), 1.21 (s, 12H);

<sup>13</sup>C NMR (126 MHz, CDCl<sub>3</sub>) δ 171.5, 169.6, 142.6, 128.6, 128.4, 125.8, 82.4, 52.6, 52.0, 37.6, 37.5, 35.8, 31.3, 31.0, 27.0, 25.2, 25.1;

<sup>11</sup>B NMR (160 MHz, CDCl<sub>3</sub>) δ 24.5;

HRMS (ESI) calcd. for C<sub>25</sub>H<sub>36</sub>BNNaO<sub>5</sub> [M+Na]<sup>+</sup> m/z 464.2579, found 464.2567;

IR (neat, cm<sup>-1</sup>) 2929, 1732, 1598, 1202, 1141;

[α]<sub>D</sub><sup>25</sup> = -29.1 (c = 0.99, CHCl<sub>3</sub>);

**HPLC analysis:** the *ee* (97%) was determined using a CHIRALPAK<sup>®</sup> AD-H column, 5% *i*PrOH in hexane, 1.0 mL/min, 220 nm UV detector, *t*<sub>R</sub> (major) = 5.2 min, *t*<sub>R</sub> (minor) = 6.0 min.

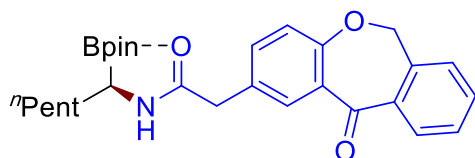

**(R)-2-(11-Oxo-6,11-dihydrodibenzo[*b,e*]oxepin-2-yl)-N-(1-(4,4,5,5-tetramethyl-1,3,2-dioxaborolan-2-yl)hexyl)acetamide** (Figure 4, **4t**). From (*E*)-2-(hex-1-en-1-yl)-4,4,5,5-tetramethyl-1,3,2-dioxaborolane (**1a**) (42.0 mg, 0.20 mmol, 1.0 equiv) and 3-((11-oxo-6,11-dihydrodibenzo[*b,e*]oxepin-2-yl)methyl)-1,4,2-dioxazol-5-one (**2t**) (92.8 mg, 0.30 mmol, 1.5 equiv), the title compound was prepared following the general procedure **A** using NiCl<sub>2</sub>·6H<sub>2</sub>O (4.8 mg, 10 mol%), **L**\* (8.0 mg, 12 mol%), LiI (13.4 mg, 0.10 mmol, 0.50 equiv), H<sub>2</sub>O (1.8 μL, 0.10 mmol, 0.50 equiv), (EtO)<sub>3</sub>SiH (92 μL, 0.50 mmol, 2.5 equiv), anhydrous DMA (1.0 mL). The reaction mixture was stirred for 20 h at 25 °C. The crude material was purified by flash column chromatography (petroleum ether/EtOAc = 1:1) to provide the title compound as a colorless oil in 50% yield (47.6 mg).

**<sup>1</sup>H NMR** (500 MHz, CDCl<sub>3</sub>) δ 8.05 (d, *J* = 2.2 Hz, 1H), 7.92 – 7.82 (m, 1H), 7.59 – 7.53 (m, 1H), 7.51 – 7.44 (m, 1H), 7.40 (dd, *J* = 8.4, 2.3 Hz, 1H), 7.38 – 7.34 (m, 1H), 7.03 (d, *J* = 8.4 Hz, 1H), 6.47 (s, 1H), 5.18 (s, 2H), 3.64 (s, 2H), 2.76 – 2.68 (m, 1H), 1.61 – 1.51 (m, 1H), 1.44 – 1.34 (m, 1H), 1.29 – 1.17 (m, 18H), 0.82 (t, *J* = 6.7 Hz, 3H);  
**<sup>13</sup>C NMR** (126 MHz, CDCl<sub>3</sub>) δ 190.7, 174.2, 160.9, 140.4, 136.4, 135.6, 133.1, 132.7, 129.6, 129.5, 128.0, 127.1, 125.5, 121.8, 81.8, 73.8, 39.3, 31.9, 31.1, 27.4, 25.3, 25.1, 22.6, 14.1;

**<sup>11</sup>B NMR** (160 MHz, CDCl<sub>3</sub>) δ 22.4;

**HRMS** (ESI) calcd. for C<sub>28</sub>H<sub>36</sub>BNNaO<sub>5</sub> [M+Na]<sup>+</sup> *m/z* 500.2579, found 500.2569;

**IR** (neat, cm<sup>-1</sup>) 3055, 2927, 1660, 1613, 1265, 735;

[α]<sub>D</sub><sup>25</sup> = -20.5 (c = 1.01, CHCl<sub>3</sub>);

**HPLC analysis:** the *ee* (97%) was determined using a CHIRALPAK<sup>®</sup> AD-H column, 10% *i*PrOH in hexane, 1.0 mL/min, 240 nm UV detector, *t*<sub>R</sub> (major) = 6.3 min, *t*<sub>R</sub> (minor) = 7.7 min.

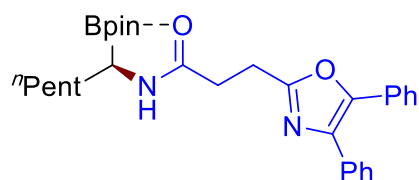

**(*R*)-3-(4,5-Diphenyloxazol-2-yl)-*N*-(1-(4,4,5,5-tetramethyl-1,3,2-dioxaborolan-2-yl)hexyl)propanamide** (Figure 4, **4u**). From (*E*)-2-(hex-1-en-1-yl)-4,4,5,5-tetramethyl-1,3,2-dioxaborolane (**1a**) (42.0 mg, 0.20 mmol, 1.0 equiv) and 3-(2-(4,5-diphenyloxazol-2-yl)ethyl)-1,4,2-dioxazol-5-one (**2u**) (100.3 mg, 0.30 mmol, 1.5 equiv), the title compound was prepared following the general procedure **A** using NiCl<sub>2</sub>·6H<sub>2</sub>O (4.8 mg, 10 mol%), **L\*** (8.0 mg, 12 mol%), LiI (13.4 mg, 0.10 mmol, 0.50 equiv), H<sub>2</sub>O (1.8 μL, 0.10 mmol, 0.50 equiv), (EtO)<sub>3</sub>SiH (92 μL, 0.50 mmol, 2.5 equiv), anhydrous DMA (1.0 mL). The reaction mixture was stirred for 20 h at 25 °C. The crude material was purified by flash column chromatography (petroleum ether/EtOAc = 1:1) to provide the title compound as a colorless oil in 51% yield (51.0 mg).

**<sup>1</sup>H NMR** (500 MHz, CDCl<sub>3</sub>) δ 7.91 (s, 1H), 7.64 – 7.56 (m, 4H), 7.41 – 7.33 (m 6H),



2.73 – 2.63 (m, 1H), 2.34 (s, 3H), 1.60 – 1.49 (m, 1H), 1.41 – 1.31 (m, 1H), 1.22 (s, 12H), 1.20 – 1.11 (m, 6H), 0.80 (t,  $J = 6.7$  Hz, 3H);

$^{13}\text{C}$  NMR (126 MHz,  $\text{CDCl}_3$ )  $\delta$  173.7, 168.4, 156.5, 139.9, 136.9, 133.6, 131.3, 131.0, 130.0, 129.4, 115.3, 112.9, 111.0, 100.6, 81.7, 55.9, 31.9, 31.2, 29.0, 27.4, 25.3, 25.1, 22.6, 14.1, 13.5;

$^{11}\text{B}$  NMR (160 MHz,  $\text{CDCl}_3$ )  $\delta$  21.9;

HRMS (ESI) calcd. for  $\text{C}_{31}\text{H}_{40}\text{BClN}_2\text{NaO}_5$   $[\text{M}+\text{Na}]^+$   $m/z$  589.2611, found 589.2596;

IR (neat,  $\text{cm}^{-1}$ ) 3249, 2928, 1678, 1603, 1323, 1146;

m.p. 150 – 151 °C;

$[\alpha]_D^{25} = -34.5$  ( $c = 0.65$ ,  $\text{CHCl}_3$ );

HPLC analysis: the *ee* (98%) was determined using a CHIRALPAK<sup>®</sup> AD-H column, 10% *i*PrOH in hexane, 1.0 mL/min, 240 nm UV detector,  $t_R$  (major) = 5.7 min,  $t_R$  (minor) = 6.7 min.

### 3. Synthetic Application

#### a. Gram-Scale Experiment

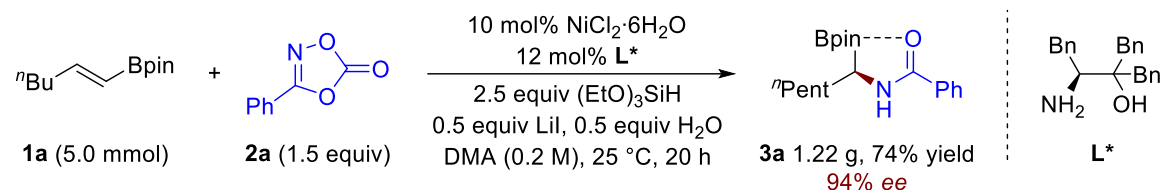

In a nitrogen-filled glove box, to an oven-dried 100 mL round bottom flask equipped with a magnetic stir bar was added NiCl<sub>2</sub>·6H<sub>2</sub>O (118.8 mg, 10 mol%), L\* (198.9 mg, 12 mol%), LiI (334.6 mg, 2.5 mmol, 0.50 equiv), 3-phenyl-1,4,2-dioxazol-5-one (**2a**) (1.224 g, 7.5 mmol, 1.5 equiv). The flask was sealed with a rubber stopper, removed from the glove box and equipped with a N<sub>2</sub> balloon, and anhydrous DMA (25 mL, 0.20 M) was added via syringe and the mixture was stirred for 10 min at 25 °C (water bath), at which time (*E*)-2-(hex-1-en-1-yl)-4,4,5,5-tetramethyl-1,3,2-dioxaborolane (**1a**) (1.051g, 5.0 mmol, 1.0 equiv), H<sub>2</sub>O (45 μL, 2.5 mmol, 0.50 equiv) were added via syringe and the mixture was stirred for 5 min and then (EtO)<sub>3</sub>SiH (2.053 g, 12.5 mmol, 2.5 equiv) was added to the resulting mixture. The mixture was stirred at 25 °C for up to 20 h. After the reaction was complete, *n*-dodecane (500 μL) was added as an internal standard for GC analysis, and the reaction was quenched upon the addition of H<sub>2</sub>O (150 mL). The mixture was extracted with Et<sub>2</sub>O. The organic layer was concentrated. The crude material was purified by flash column chromatography (petroleum ether/EtOAc = 2:1) to provide **3a** as a white solid in 74% yield (1.220 g). The *ee* (94%) was determined via chiral HPLC analysis.

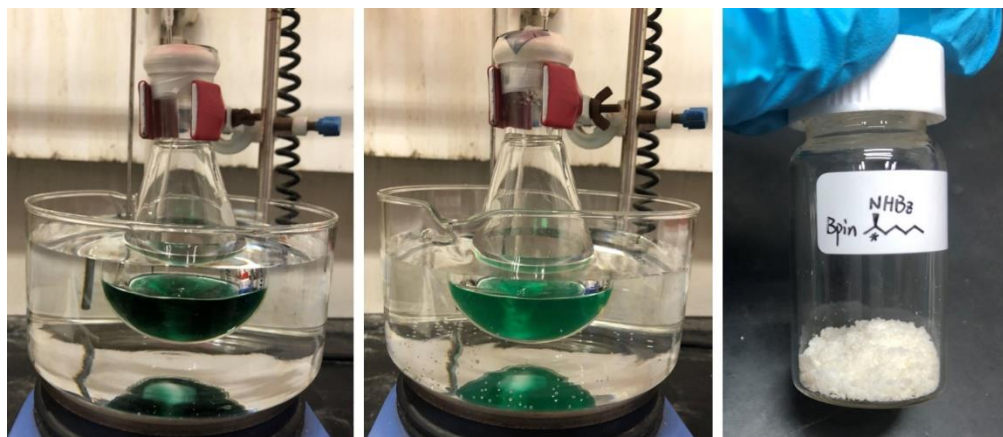

**Supplementary Figure 1: (Left)** All the reagents were added and stirred at 25 °C for 10 min. (a

dark green homogeneous mixture) (**Center**) The mixture was stirred at 25 °C for 20 h. (a light green homogeneous mixture) (**Right**) Purified product **3a**. (A white solid (1.220 g) was obtained after purification by column chromatography.).

### b. One-pot asymmetric hydroamidation *w/o* isolation of alkenyl boronate

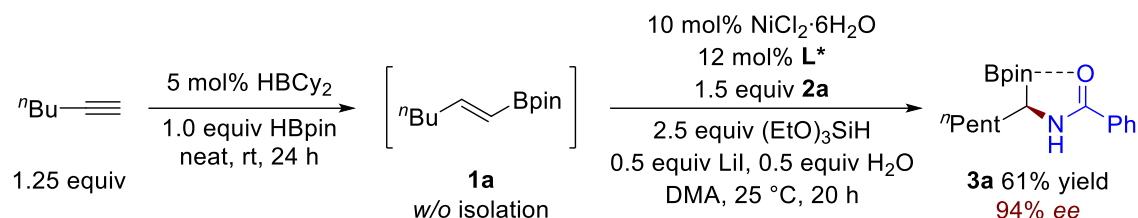

The procedure was modified from the previous literature<sup>7</sup>. In a nitrogen-filled glove box, to an oven-dried 8 mL screw-cap vial equipped with a magnetic stir bar was added freshly prepared dicyclohexylborane (3.6 mg, 5 mol%), 1-hexyne (41.1 mg, 0.5 mmol, 1.25 equiv) and pinacolborane (58  $\mu\text{L}$ , 0.4 mmol, 1.0 equiv). The reaction mixture was stirred for 18 hours. Afterwards, the volatile materials were removed under reduced pressure at room temperature for 1 h. The vial was refilled with  $\text{N}_2$  and transferred to the nitrogen-filled glove box.  $\text{NiCl}_2\cdot 6\text{H}_2\text{O}$  (9.6 mg, 10 mol%),  $\text{L}^*$  (16.0 mg, 12 mol%), LiI (26.8 mg, 0.20 mmol, 0.50 equiv), 3-phenyl-1,4,2-dioxazol-5-one (**2a**) (97.8 mg, 0.60 mmol, 1.5 equiv) and anhydrous DMA (2.0 mL, 0.20 M) were added to the vial. The mixture was stirred for 10 min at room temperature, at which time  $\text{H}_2\text{O}$  (3.6  $\mu\text{L}$ , 0.20 mmol, 0.50 equiv) and  $(\text{EtO})_3\text{SiH}$  (184  $\mu\text{L}$ , 1.0 mmol, 2.5 equiv) were added to the resulting mixture in this order. The tube was sealed with a teflon-lined screw cap, removed from the glove box and the reaction was stirred at 25 °C water bath for up to 20 h (the mixture was stirred at 1000 rpm). After the reaction was complete, *n*-dodecane (40  $\mu\text{L}$ ) was added as an internal standard for GC analysis, and the reaction was quenched upon the addition of  $\text{H}_2\text{O}$ . The mixture was extracted with  $\text{Et}_2\text{O}$ . The organic layer was concentrated. The crude material was purified by flash column chromatography (petroleum ether/ $\text{EtOAc}$  = 2:1) to provide **3a** as a white solid in 61% yield (80.6 mg). The *ee* (94%) was determined via chiral HPLC analysis.



### c. Concise Synthetic Route to Vaborbactam

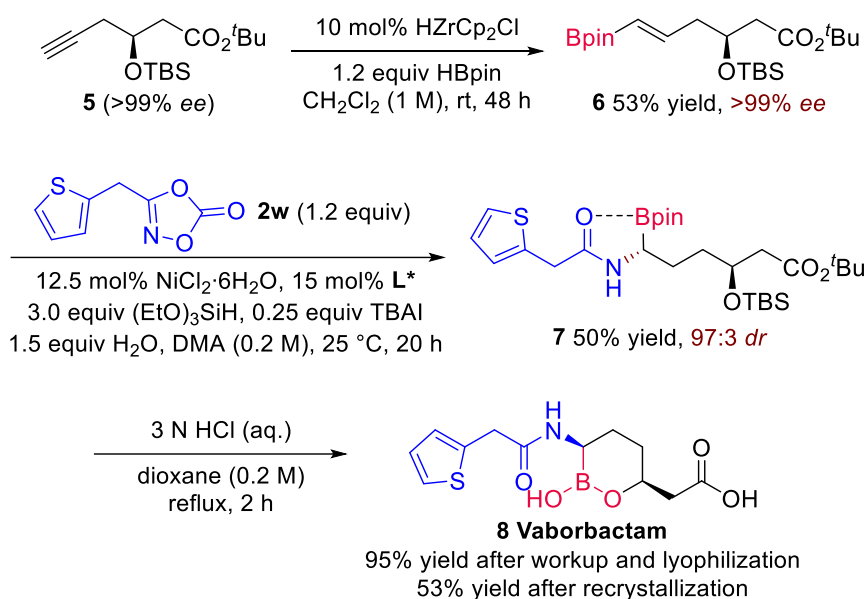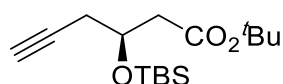

**tert-Butyl (S)-3-((tert-butyldimethylsilyl)oxy)hex-5-ynoate** (Figure 5, **5**). The title compound was prepared according to the known literature method<sup>2</sup>. Spectral data match the previously reported.

**<sup>1</sup>H NMR** (500 MHz, CDCl<sub>3</sub>)  $\delta$  4.29 – 4.17 (m, 1H), 2.58 (dd,  $J = 15.4, 4.8$  Hz, 1H), 2.45 (dd,  $J = 15.4, 7.1$  Hz, 1H), 2.40 (dd,  $J = 6.1, 2.7$  Hz, 2H), 1.99 (t,  $J = 2.7$  Hz, 1H), 1.45 (s, 9H), 0.87 (s, 9H), 0.10 (s, 3H), 0.08 (s, 3H);

**<sup>13</sup>C NMR** (126 MHz, CDCl<sub>3</sub>)  $\delta$  170.7, 81.0, 80.6, 70.6, 68.1, 43.1, 28.3, 27.5, 25.9, 18.1, -4.5, -4.7;

**HRMS** (ESI) calcd. for C<sub>16</sub>H<sub>30</sub>NaO<sub>3</sub>Si [M+Na]<sup>+</sup>  $m/z$  321.1856, found 321.1847;

$[\alpha]_D^{25} = +28.9$  ( $c = 1.02$ , CHCl<sub>3</sub>),  $>99\%$  ee;

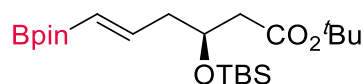

**tert-Butyl (S,E)-3-((tert-butyldimethylsilyl)oxy)-6-(4,4,5,5-tetramethyl-1,3,2-dioxaborolan-2-yl)hex-5-enoate** (Figure 5, **6**). Under N<sub>2</sub> atmosphere, to an oven-dried round bottom flask equipped with a stir bar, Schwartz's reagent (0.351 g, 10 mol%), CH<sub>2</sub>Cl<sub>2</sub> (13 mL) and *tert*-butyl (S)-3-((tert-butyldimethylsilyl)oxy)hex-5-ynoate (**5**)

(4.060 g, 13.6 mmol, 1.0 equiv) were added and stirred for 5 minutes. At 0 °C, pinacolborane (2.089 g, 16.3 mmol, 1.2 equiv) was added dropwise to the mixture. Then, the mixture was allowed to warm to rt and stirred for 48 hours. The reaction was quenched with H<sub>2</sub>O carefully, extracted with Et<sub>2</sub>O, and concentrated under reduced pressure. The crude mixture was purified by silica gel chromatography (petroleum ether/EtOAc = 30:1) to afford the titled (*E*)-alkenyl boronate as a colorless oil in 53% yield (3.068 g).

<sup>1</sup>H NMR (500 MHz, CDCl<sub>3</sub>) δ 6.57 (dt, *J* = 17.9, 7.0 Hz, 1H), 5.47 (d, *J* = 17.9 Hz, 1H), 4.22 – 4.13 (m, 1H), 2.40 – 2.32 (m, 4H), 1.43 (s, 9H), 1.25 (s, 12H), 0.86 (s, 9H), 0.06 (s, 3H), 0.05 (s, 3H);

<sup>13</sup>C NMR (126 MHz, CDCl<sub>3</sub>) δ 171.0, 150.1, 83.2, 80.4, 68.9, 44.4, 43.7, 28.3, 26.0, 24.9, 24.9, 18.2, -4.3, -4.6;

<sup>11</sup>B NMR (160 MHz, CDCl<sub>3</sub>) δ 29.9;

HRMS (ESI) calcd. for C<sub>22</sub>H<sub>43</sub>BNaO<sub>5</sub>Si [M+Na]<sup>+</sup> *m/z* 449.2865, found 449.2853;

IR (neat, cm<sup>-1</sup>) 2978, 2930, 1730, 1640, 1361, 1142, 832;

[α]<sub>D</sub><sup>25</sup> = +13.8 (c = 1.09, CHCl<sub>3</sub>);

HPLC analysis: the *ee* (>99%) was determined using a CHIRALPAK<sup>®</sup> IF-3 column, 0.5% *i*PrOH in hexane, 1.0 mL/min, 220 nm UV detector, *t*<sub>R</sub> (minor) = 6.9 min, *t*<sub>R</sub> (major) = 8.8 min.

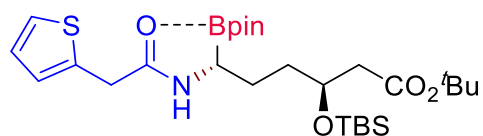

**tert-Butyl (3*S*,6*R*)-3-((*tert*-butyldimethylsilyl)oxy)-6-(4,4,5,5-tetramethyl-1,3,2-dioxaborolan-2-yl)-6-(2-(thiophen-2-yl)acetamido)hexanoate** (Figure 5, 7). From *tert*-butyl (*S,E*)-3-((*tert*-butyldimethylsilyl)oxy)-6-(4,4,5,5-tetramethyl-1,3,2-dioxaborolan-2-yl)hex-5-enoate (**6**) (85.3 mg, 0.20 mmol, 1.0 equiv) and 3-(thiophen-2-ylmethyl)-1,4,2-dioxazol-5-one (**2w**) (44.0 mg, 0.24 mmol, 1.2 equiv), the title compound was prepared following the general procedure **A** using NiCl<sub>2</sub>·6H<sub>2</sub>O (5.9 mg, 12.5 mol%), **L\*** (12.0 mg, 15 mol%), TBAI (18.5 mg, 0.050 mmol, 0.25 equiv, instead

of LiI), H<sub>2</sub>O (5.4 μL, 0.30 mmol, 1.5 equiv), (EtO)<sub>3</sub>SiH (110 μL, 0.60 mmol, 3.0 equiv), anhydrous DMA (1.0 mL). The reaction mixture was stirred for 20 h at 25 °C. The crude material was purified by flash column chromatography (petroleum ether/EtOAc = 2:1) to provide the title compound as a yellow oil in 50% yield (56.4 mg).

<sup>1</sup>H NMR (500 MHz, CDCl<sub>3</sub>) δ 7.25 (dd, *J* = 5.1, 0.9 Hz, 1H), 6.98 (dd, *J* = 5.1, 3.5 Hz, 1H), 6.93 (d, *J* = 3.1 Hz, 1H), 6.58 (s, 1H), 4.08 – 3.97 (m, 1H), 3.87 (s, 2H), 2.76 – 2.66 (m, 1H), 2.39 – 2.26 (m, 2H), 1.65 – 1.55 (m, 1H), 1.55 – 1.44 (m, 3H), 1.41 (s, 9H), 1.22 (s, 12H), 0.84 (s, 9H), 0.02 (s, 3H), 0.02 (s, 3H);

<sup>13</sup>C NMR (126 MHz, CDCl<sub>3</sub>) δ 173.9, 171.3, 133.9, 128.2, 127.7, 126.2, 81.7, 80.5, 68.9, 43.6, 35.0, 34.1, 28.3, 26.4, 26.0, 25.3, 25.1, 18.1, -4.4, -4.6;

<sup>11</sup>B NMR (160 MHz, CDCl<sub>3</sub>) δ 21.8;

HRMS (ESI) calcd. for C<sub>28</sub>H<sub>50</sub>BNNaO<sub>6</sub>SSi [M+Na]<sup>+</sup> *m/z* 590.3113, found 590.3103;

IR (neat, cm<sup>-1</sup>) 2968, 2929, 1729, 1607, 1149, 834;

[α]<sub>D</sub><sup>25</sup> = -20.2 (*c* = 1.00, CHCl<sub>3</sub>);

HPLC analysis: the *dr* (97:3) was determined using a CHIRALPAK<sup>®</sup> AD-H column, 5% *i*PrOH in hexane, 1.0 mL/min, 240 nm UV detector, *t*<sub>R</sub> (major) = 4.3 min, *t*<sub>R</sub> (minor) = 6.5 min.

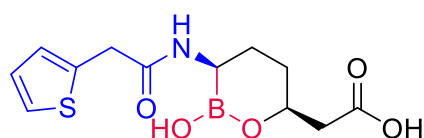

**2-((3R,6S)-2-Hydroxy-3-(2-(thiophen-2-yl)acetamido)-1,2-oxaborinan-6-yl)acetic acid**<sup>3</sup> (Figure 5, **8**). The title compound was prepared according to a known method with a similar substrate<sup>3</sup>. To a solution of *tert*-butyl (3*S*,6*R*)-3-((*tert*-butyldimethylsilyl)oxy)-6-(4,4,5,5-tetramethyl-1,3,2-dioxaborolan-2-yl)-6-(2-(thiophen-2-yl)acetamido)hexanoate (**7**) (398 mg, 0.70 mmol) in 1,4-dioxane (2 mL) was added 2 mL of 3 N HCl (aq.). The reaction mixture was heated at reflux for 2 h, after which the cooled reaction mixture was diluted with water (2 mL) and extracted with Et<sub>2</sub>O (3 × 6 mL). The aqueous layer was concentrated to afford a sticky residue which was azeotroped with MeCN (3 × 8 mL), dissolved in 20% dioxane-water, and

lyophilized to afford a white powder (198 mg, 95%).

The crude product (150 mg) was suspended in EtOAc (3 mL). Water (0.5 mL) was added, and most of the compound appeared to go into the water layer. After sonicating for about 30 min, a white precipitate formed. The solid was collected by filtration, washed with Et<sub>2</sub>O and hexane. The solid was dissolved in 20% dioxane-water, and lyophilized to provide the title compound as a white solid in 53% yield (79.2 mg).

**<sup>1</sup>H NMR** (500 MHz, CD<sub>3</sub>OD) δ 7.34 (dd, *J* = 5.2, 1.2 Hz, 1H), 7.09 – 7.02 (m, 1H), 7.00 (dd, *J* = 5.2, 3.5 Hz, 1H), 4.14 – 4.04 (m, 1H), 3.97 (s, 2H), 2.66 – 2.57 (m, 1H), 2.37 (dd, *J* = 15.0, 7.3 Hz, 1H), 2.25 (dd, *J* = 15.0, 5.8 Hz, 1H), 1.78 – 1.68 (m, 1H), 1.68 – 1.52 (m, 2H), 1.11 – 0.97 (m, 1H);

**<sup>13</sup>C NMR** (126 MHz, CD<sub>3</sub>OD) δ 177.8, 175.6, 135.2, 128.8, 128.2, 126.7, 70.5, 44.4, 32.6, 28.5, 27.6;

**<sup>11</sup>B NMR** (160 MHz, CD<sub>3</sub>OD) δ 11.7;

**HRMS** (ESI) calcd. for C<sub>12</sub>H<sub>15</sub>BNO<sub>4</sub>S [M–H<sub>2</sub>O+H]<sup>+</sup> *m/z* 280.0809, found 280.0802;

**IR** (neat, cm<sup>-1</sup>) 3511, 2941, 1718, 1607, 1225, 1183, 701;

**[α]<sub>D</sub><sup>25</sup>** = –6.1 (*c* = 0.85, CH<sub>3</sub>OH).

## 4. Mechanistic Experiments

### a. Nonlinear effect study

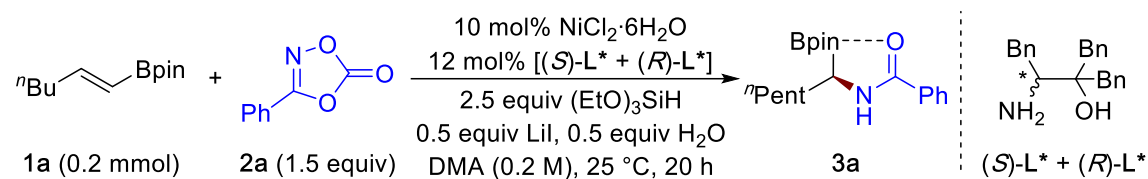

Supplementary Table 1: Nonlinear effect study

| Entry | ee (%) of mixed L* | (S)-L* (mg) | (R)-L* (mg) | ee (%) of 3a |
|-------|--------------------|-------------|-------------|--------------|
| 1     | 20                 | 4.8         | 3.2         | 17           |
| 2     | 40                 | 5.6         | 2.4         | 37           |
| 3     | 60                 | 6.4         | 1.6         | 52           |
| 4     | 80                 | 7.2         | 0.8         | 73           |
| 5     | 99                 | 8.0         | 0           | 95           |

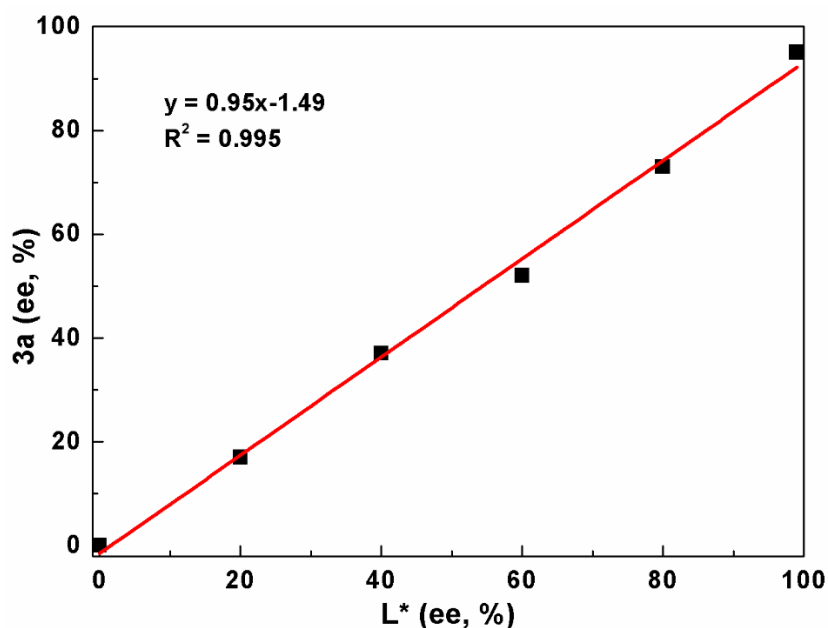

5 parallel reactions at 0.20 mmol scale were performed following general procedure A. In a nitrogen-filled glove box, to an oven-dried 8 mL screw-cap vial equipped with a magnetic stir bar was added  $\text{NiCl}_2 \cdot 6\text{H}_2\text{O}$  (4.8 mg, 10 mol%), specified amount of (S)-L\* and (R)-L\* (to provide the enantiomeric composition of L\*) as listed in Supplementary Table 1, LiI (13.4 mg, 0.10 mmol, 0.50 equiv), 3-phenyl-1,4,2-dioxazol-5-one (2a) (48.9 mg, 0.30 mmol, 1.5 equiv) and anhydrous DMA (1.0 mL,

0.20 M). The mixture was stirred for 10 min at room temperature, at which time (*E*)-2-(hex-1-en-1-yl)-4,4,5,5-tetramethyl-1,3,2-dioxaborolane (**1a**) (42.0 mg, 0.20 mmol, 1.0 equiv), H<sub>2</sub>O (1.8 μL, 0.10 mmol, 0.50 equiv) and (EtO)<sub>3</sub>SiH (92 μL, 0.50 mmol, 2.5 equiv) were added to the resulting mixture in this order. The tube was sealed with a teflon-lined screw cap, removed from the glove box and the reaction was stirred at 25 °C water bath (the mixture was stirred at 800 rpm). The reactions were stopped at the indicated reaction time, quenched upon the addition of H<sub>2</sub>O and extracted with Et<sub>2</sub>O. *n*-Dodecane (20 μL) was added as an internal standard for GC analysis. The organic layer was concentrated to give the crude product. The product was purified by flash column chromatography (petroleum ether/EtOAc = 2:1) for each substrate. The enantiomeric excesses (% *ee*) were determined by HPLC analysis using chiral stationary phases.

**Note:** A linear correlation between the *ee* value of the ligand **L\*** and that of the product **3a** was observed, consistent with the monomeric nature of the active catalyst.

## b. Isotopic labelling experiments

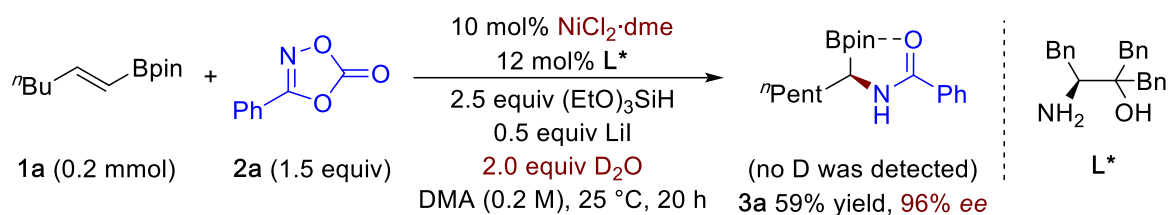

Following the general procedure **A**, in a nitrogen-filled glove box, to an oven-dried 8 mL screw-cap vial equipped with a magnetic stir bar was added NiCl<sub>2</sub>·dme (4.4 mg, 10 mol%), L\* (8.0 mg, 12 mol%), LiI (13.4 mg, 0.10 mmol, 0.50 equiv), 3-phenyl-1,4,2-dioxazol-5-one (**2a**) (48.9 mg, 0.30 mmol, 1.5 equiv) and anhydrous DMA (1.0 mL, 0.20 M) were added, and the mixture was stirred for 10 min at 25 °C, at which time (*E*)-2-(hex-1-en-1-yl)-4,4,5,5-tetramethyl-1,3,2-dioxaborolane (**1a**) (42.0 mg, 0.20 mmol, 1.0 equiv), D<sub>2</sub>O (7.2 μL, 0.40 mmol, 2.0 equiv) and (EtO)<sub>3</sub>SiH (92 μL, 0.50 mmol, 2.5 equiv) were added to the resulting mixture in this order. The tube was sealed with a teflon-lined screw cap, removed from the glove box and the reaction was stirred at 25 °C for up to 20 h (the mixture was stirred at 800 rpm). The reaction was quenched upon the addition of H<sub>2</sub>O, and the mixture was extracted with Et<sub>2</sub>O. The organic layer was concentrated to give the crude product. *n*-Dodecane (20 μL) was added as an internal standard for GC analysis. The crude material was purified by flash column chromatography (petroleum ether/EtOAc = 2:1) to provide **3a** as a colorless liquid in 57% yield (37.7 mg). The *ee* (96%) of **3a** was determined via HPLC analysis.

**Note:** Although 2 equiv D<sub>2</sub>O was added, no deuterium incorporation was observed in the product (**3a**), eliminating the possibility of a protic reagent as the hydride source.

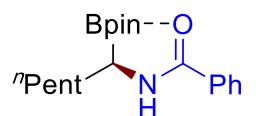

(no D was detected)

**(*R*)-*N*-(1-(4,4,5,5-Tetramethyl-1,3,2-dioxaborolan-2-yl)hexyl)benzamide** (Figure 6, **3a**, no D was detected).

<sup>1</sup>H NMR (500 MHz, CDCl<sub>3</sub>) δ 8.53 (s, 1H), 7.80 (d, *J* = 7.6 Hz, 2H), 7.45 (t, *J* = 7.4 Hz, 1H), 7.32 (t, *J* = 7.6 Hz, 2H), 2.79 (t, *J* = 6.5 Hz, 1H), 1.75 – 1.65 (m, 1H), 1.61 –

1.52 (m, 1H), 1.49 – 1.37 (m, 2H), 1.34 – 1.28 (m, 4H), 1.26 (s, 12H), 0.88 (t,  $J = 7.0$  Hz, 3H);

$^{13}\text{C}$  NMR (126 MHz,  $\text{CDCl}_3$ )  $\delta$  170.9, 133.1, 128.6, 128.3, 127.9, 81.2, 32.1, 31.3, 27.6, 25.4, 25.2, 22.7, 14.2;

$^{11}\text{B}$  NMR (160 MHz,  $\text{CDCl}_3$ )  $\delta$  17.6;

$^2\text{H}$  NMR (92 MHz,  $\text{CHCl}_3$ ) no D was detected.

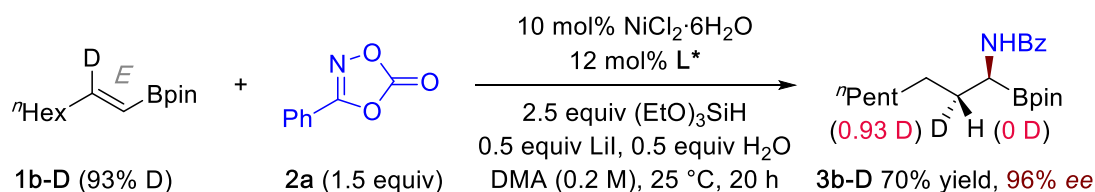

Following the general procedure **A**, in a nitrogen-filled glove box, to an oven-dried 8 mL screw-cap vial equipped with a magnetic stir bar was added  $\text{NiCl}_2\cdot 6\text{H}_2\text{O}$  (4.8 mg, 10 mol%), **L\*** (8.0 mg, 12 mol%), LiI (13.4 mg, 0.50 equiv), 3-phenyl-1,4,2-dioxazol-5-one (**2a**) (48.9 mg, 0.30 mmol, 1.5 equiv) and anhydrous DMA (1.0 mL) were added, and the mixture was stirred for 10 min at 25 °C, at which time (*E*)-4,4,5,5-tetramethyl-2-(oct-1-en-1-yl-2-d)-1,3,2-dioxaborolane (**1b-D**, 93% D) (47.8 mg, 0.20 mmol, 1.0 equiv),  $\text{H}_2\text{O}$  (1.8  $\mu\text{L}$ , 0.50 equiv) and  $(\text{EtO})_3\text{SiH}$  (92  $\mu\text{L}$ , 2.5 equiv) were added to the resulting mixture in this order. The tube was sealed with a teflon-lined screw cap, removed from the glove box and the reaction was stirred at 25 °C for up to 20 h (the mixture was stirred at 800 rpm). The reaction was quenched upon the addition of  $\text{H}_2\text{O}$ , and the mixture was extracted with  $\text{Et}_2\text{O}$ . The organic layer was concentrated to give the crude product. *n*-Dodecane (20  $\mu\text{L}$ ) was added as an internal standard for GC analysis. The crude material was purified by flash column chromatography (petroleum ether/ $\text{EtOAc} = 2:1$ ) to provide **3b-D** as a colorless liquid in 70% yield (50.1 mg). The *ee* (96%) of **3b-D** was determined via HPLC analysis.

**Note:** Diastereomerically pure **3b-D** was obtained from this reaction, indicating that *syn*-hydronicellation is involved in the enantio-determining step.



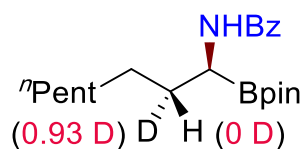

***N*-((1*S*,2*R*)-1-(4,4,5,5-Tetramethyl-1,3,2-dioxaborolan-2-yl)octyl-2-d)benzamide**

(Figure 6, **3b-D**).

$^1\text{H NMR}$  (500 MHz,  $\text{CDCl}_3$ )  $\delta$  8.45 (s, 1H), 7.80 (d,  $J = 7.4$  Hz, 2H), 7.46 (t,  $J = 7.4$  Hz, 1H), 7.32 (t,  $J = 7.7$  Hz, 2H), 2.79 (d,  $J = 6.8$  Hz, 1H), 1.74 – 1.66 (m, 0.07H), 1.58 – 1.51 (m, 1H), 1.46 – 1.36 (m, 2H), 1.33 – 1.20 (m, 20H), 0.87 (t,  $J = 6.9$  Hz, 3H);

$^{13}\text{C NMR}$  (126 MHz,  $\text{CDCl}_3$ )  $\delta$  170.9, 133.1, 128.6, 128.3, 128.0, 81.2, 32.0, 31.0 (t,  $J = 18.9$  Hz), 29.9, 29.4, 27.9, 25.4, 25.2, 22.8, 14.3;

$^{11}\text{B NMR}$  (160 MHz,  $\text{CDCl}_3$ )  $\delta$  18.0;

$^2\text{H NMR}$  (92 MHz,  $\text{CHCl}_3$ )  $\delta$  1.68 (corresponding to the missing 0.93H);

**HRMS** (ESI) calcd. for  $\text{C}_{21}\text{H}_{33}\text{DBNNaO}_3$   $[\text{M}+\text{Na}]^+$   $m/z$  383.2587, found 383.2576;

**IR** (neat,  $\text{cm}^{-1}$ ) 3196, 2923, 2854, 1610, 1154, 1111, 706;

$[\alpha]_{\text{D}}^{25} = -38.3$  ( $c = 1.00$ ,  $\text{CHCl}_3$ );

**HPLC analysis:** the *ee* (96%) was determined using a CHIRALCEL<sup>®</sup> OD-H column, 8% *i*PrOH in hexane, 0.5 mL/min, 254 nm UV detector,  $t_{\text{R}}$  (minor) = 7.3 min,  $t_{\text{R}}$  (major) = 7.9 min (see Supplementary Figure 192).

### c. Capture of metal-nitrenoid intermediate

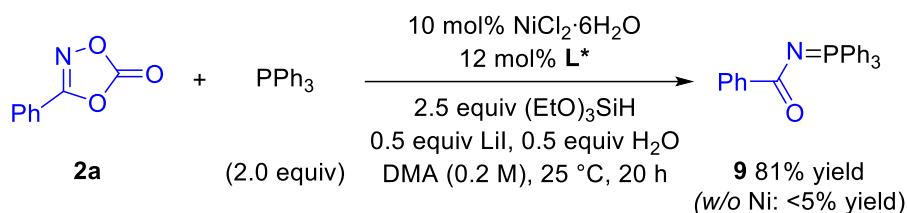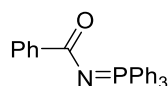

*N*-(Triphenyl- $\lambda^5$ -phosphaneylidene)benzamide (Figure 6, **9**). In a nitrogen-filled glove box, to an oven-dried 8 mL screw-cap vial equipped with a magnetic stir bar was added  $\text{NiCl}_2 \cdot 6\text{H}_2\text{O}$  (4.8 mg, 10 mol%),  $\text{L}^*$  (8.0 mg, 12 mol%),  $\text{LiI}$  (13.4 mg, 0.10 mmol, 0.50 equiv), 1,4,2-dioxazol-5-one (32.6 mg, 0.20 mmol, 1.0 equiv),  $\text{PPh}_3$  (104.9 mg, 0.40 mmol, 2.0 equiv), anhydrous DMA (1.0 mL, 0.20 M) were added and the mixture was stirred for 10 min at room temperature.  $\text{H}_2\text{O}$  (1.8  $\mu\text{L}$ , 0.10 mmol, 0.50 equiv) and  $(\text{EtO})_3\text{SiH}$  (92  $\mu\text{L}$ , 0.50 mmol, 2.5 equiv) were added to the resulting mixture in this order. The tube was sealed with a teflon-lined screw cap, removed from the glove box and the reaction was stirred at 25 °C water bath for up to 20 h (the mixture was stirred at 800 rpm). After the reaction was complete, the reaction was quenched upon the addition of  $\text{H}_2\text{O}$ , and the mixture was extracted with  $\text{EtOAc}$ . The organic layer was concentrated to give the crude product. The crude material was purified by flash column chromatography (petroleum ether/ $\text{EtOAc}$  = 4:1) to provide the title compound as a white solid in 81% yield (61.5 mg).

$^1\text{H NMR}$  (400 MHz,  $\text{CDCl}_3$ )  $\delta$  8.37 (dd,  $J$  = 8.0, 1.5 Hz, 2H), 7.94 – 7.78 (m, 6H), 7.60 – 7.53 (m, 3H), 7.53 – 7.37 (m, 9H);

$^{13}\text{C NMR}$  (101 MHz,  $\text{CDCl}_3$ )  $\delta$  176.2, 138.6, 133.3 (d,  $J$  = 9.9 Hz), 132.4, 130.8, 129.6, 128.8 (d,  $J$  = 12.3 Hz), 127.8;

$^{31}\text{P NMR}$  (202 MHz,  $\text{CDCl}_3$ )  $\delta$  20.7;

**HRMS** (ESI) calcd. for  $\text{C}_{25}\text{H}_{20}\text{NNaOP}$   $[\text{M}+\text{Na}]^+$   $m/z$  404.1175, found 404.1163;

**IR** (neat,  $\text{cm}^{-1}$ ) 3057, 1594, 1557, 1328, 1106, 719, 690, 515;

**m.p.** 198 – 199 °C.

#### d. Monitoring of the Reaction Progress

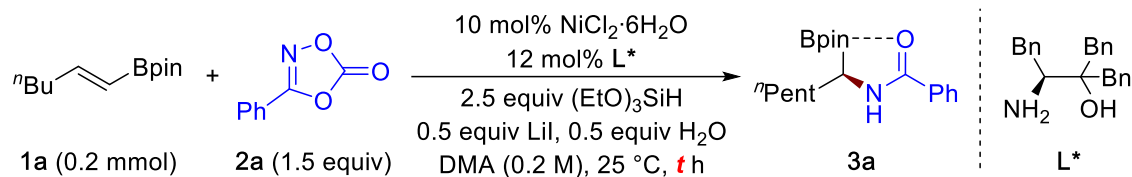

Supplementary Table 2: Yield and *ee* of **3a** as a function of time

| Entry | <i>t</i> (h) | yield (%) | <i>ee</i> (%) |
|-------|--------------|-----------|---------------|
| 1     | 1            | 28        | 95            |
| 2     | 2            | 44        | 95            |
| 3     | 4            | 59        | 95            |
| 4     | 6.5          | 75        | 95            |
| 5     | 20           | 75        | 95            |
| 6     | 26           | 75        | 95            |
| 7     | 45           | 75        | 95            |

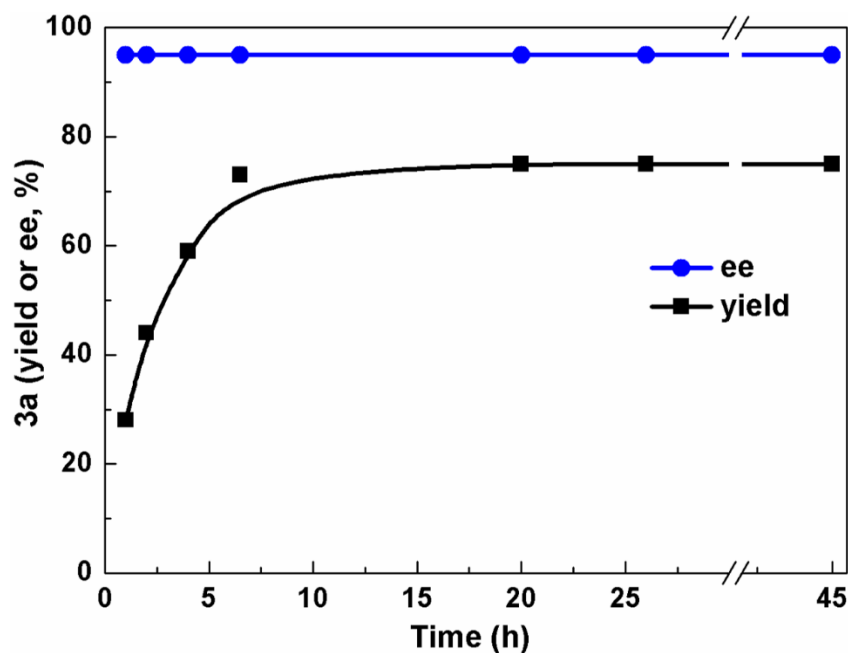

7 parallel reactions at 0.20 mmol scale were performed following general procedure A. In a nitrogen-filled glove box, to an oven-dried 8 mL screw-cap vial equipped with a magnetic stir bar was added NiCl<sub>2</sub>·6H<sub>2</sub>O (4.8 mg, 10 mol%), **L**\* (8.0 mg, 12 mol%), LiI (13.4 mg, 0.10 mmol, 0.50 equiv), 3-phenyl-1,4,2-dioxazol-5-one (**2a**) (48.9 mg, 0.30 mmol, 1.5 equiv) and anhydrous DMA (1.0 mL, 0.20 M). The mixture was stirred

for 10 min at room temperature, at which time (*E*)-2-(hex-1-en-1-yl)-4,4,5,5-tetramethyl-1,3,2-dioxaborolane (**1a**) (42.0 mg, 0.20 mmol, 1.0 equiv), H<sub>2</sub>O (1.8 μL, 0.10 mmol, 0.50 equiv) and (EtO)<sub>3</sub>SiH (92 μL, 0.50 mmol, 2.5 equiv) were added to the resulting mixture in this order. The tube was sealed with a teflon-lined screw cap, removed from the glove box and the reaction was stirred at 25 °C water bath (the mixture was stirred at 800 rpm). The reactions were stopped at the indicated reaction time, quenched upon the addition of H<sub>2</sub>O and extracted with Et<sub>2</sub>O. *n*-Dodecane (20 μL) was added as an internal standard for GC analysis. The organic layer was concentrated to give the crude product. The product was purified by flash column chromatography (petroleum ether/EtOAc = 2:1) for each substrate. The enantiomeric excesses (% *ee*) were determined by HPLC analysis using chiral stationary phases.

**Note:** During the entire reaction, the *ee* of the product remained unchanged.

## 5. Determination of the Absolute Configuration

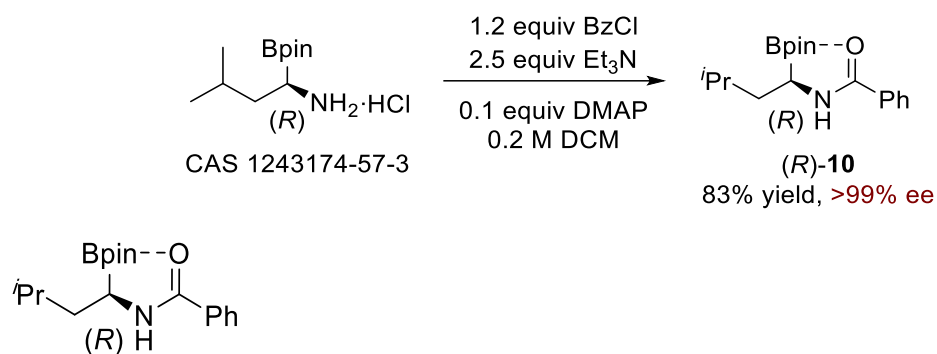

**(R)-N-(3-Methyl-1-(4,4,5,5-tetramethyl-1,3,2-dioxaborolan-2-yl)butyl)benzamide ((R)-10).** To a stirred solution of (*R*)-3-methyl-1-(4,4,5,5-tetramethyl-1,3,2-dioxaborolan-2-yl)butan-1-amine hydrochloride (CAS 1243174-57-3, commercial available optically pure compound) (49.9 mg, 0.20 mmol, 1.0 equiv), dimethylaminopyridine (DMAP, 2.4 mg, 0.020 mmol, 0.10 equiv) in dry CH<sub>2</sub>Cl<sub>2</sub> (15 mL) at 0 °C was added Et<sub>3</sub>N (70 μL, 0.5 mmol, 2.5 equiv). After 10 minutes, benzoyl chloride (33.7 mg, 0.24 mmol, 1.2 equiv) were added. The resulting reaction mixture was allowed to warm to rt and the stirring was continued for overnight. After the reaction was complete, the reaction was quenched upon the addition of H<sub>2</sub>O, and the mixture was extracted with EtOAc. After removal of solvent under reduced pressure, the crude material was purified by flash column chromatography (petroleum ether/EtOAc = 2:1) to provide the title compound **10** as a white solid in 83% yield (52.4 mg), and the spectral data match **3d**.

$[\alpha]_D^{25} = -40.9$  ( $c = 0.94$ , CHCl<sub>3</sub>);

**HPLC analysis:** the *ee* (>99%) was determined using a CHIRALPAK<sup>®</sup> AD-H column, 5% *i*PrOH in hexane, 1.0 mL/min, 240 nm UV detector,  $t_R$  (minor) = 4.8 min,  $t_R$  (major) = 5.6 min, (*R*) configuration (see Supplementary Figure 197).

**Note:** The absolute configuration of **3d** was determined to be (*R*) by comparison of the optical rotation and HPLC peak of the title compound with **3d** ( $[\alpha]_D^{25} = -37.3$  ( $c = 0.96$ , CHCl<sub>3</sub>); HPLC analysis: the *ee* (92%) of **3d** was determined using a CHIRALPAK<sup>®</sup> AD-H column, 5% *i*PrOH in hexane, 1.0 mL/min, 240 nm UV detector,  $t_R$  (minor) = 4.8 min,  $t_R$  (major) = 5.5 min.).

## 6. Conditions Optimization

**Supplementary Table 3:** Effect of reaction parameters<sup>[a]</sup>.

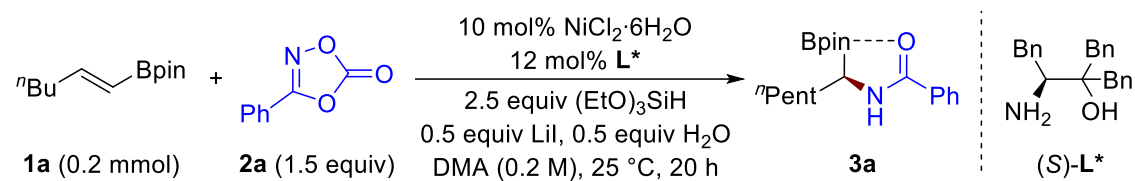

| Entry | Variation from the standard conditions                                                                    | Yield (%) | ee (%) |
|-------|-----------------------------------------------------------------------------------------------------------|-----------|--------|
| 1     | None                                                                                                      | 75 (71)   | 95     |
| 2     | w/o Ni                                                                                                    | 0         | -      |
| 3     | w/o $\text{L}^*$                                                                                          | 13        | nd     |
| 4     | $\text{NiCl}_2 \cdot \text{dme}$ instead of $\text{NiCl}_2 \cdot 6\text{H}_2\text{O}$                     | 63        | 86     |
| 5     | $\text{NiBr}_2 \cdot 3\text{H}_2\text{O}$ instead of $\text{NiCl}_2 \cdot 6\text{H}_2\text{O}$            | 58        | 61     |
| 6     | $\text{NiCl}_2$ instead of $\text{NiCl}_2 \cdot 6\text{H}_2\text{O}$                                      | <5        | nd     |
| 7     | $\text{Ni}(\text{NO}_3)_2 \cdot 6\text{H}_2\text{O}$ instead of $\text{NiCl}_2 \cdot 6\text{H}_2\text{O}$ | <5        | nd     |
| 8     | $\text{NiI}_2$ instead of $\text{NiCl}_2 \cdot 6\text{H}_2\text{O}$                                       | 8         | nd     |
| 9     | $\text{NiI}_2 \cdot x\text{H}_2\text{O}$ instead of $\text{NiCl}_2 \cdot 6\text{H}_2\text{O}$             | 8         | nd     |
| 10    | w/o $\text{LiI}$                                                                                          | 46        | 97     |
| 11    | $\text{NaI}$ instead of $\text{LiI}$                                                                      | 67        | 94     |
| 12    | TBAI instead of $\text{LiI}$                                                                              | 72        | 95     |
| 13    | DMMS instead of $(\text{EtO})_3\text{SiH}$                                                                | 69        | 96     |
| 14    | DEMS instead of $(\text{EtO})_3\text{SiH}$                                                                | 20        | 94     |
| 15    | $(\text{MeO})_3\text{SiH}$ instead of $(\text{EtO})_3\text{SiH}$                                          | 67        | 95     |
| 16    | PMHS instead of $(\text{EtO})_3\text{SiH}$                                                                | <5        | nd     |
| 17    | w/o $\text{H}_2\text{O}$                                                                                  | 58        | 81     |
| 18    | $\text{MeOH}$ instead of $\text{H}_2\text{O}$                                                             | 73        | 89     |
| 19    | $\text{EtOH}$ instead of $\text{H}_2\text{O}$                                                             | 72        | 88     |
| 20    | $i\text{PrOH}$ instead of $\text{H}_2\text{O}$                                                            | 72        | 85     |
| 21    | $t\text{BuOH}$ instead of $\text{H}_2\text{O}$                                                            | 64        | 80     |
| 22    | DMF instead of DMAc                                                                                       | 11        | nd     |
| 23    | DMPU instead of DMAc                                                                                      | 13        | nd     |
| 24    | NMP instead of DMAc                                                                                       | 49        | 96     |
| 25    | THF instead of DMAc                                                                                       | 12        | nd     |
| 26    | DCE instead of DMAc                                                                                       | <5        | nd     |
| 27    | 10 °C instead of 25 °C                                                                                    | 59        | 97     |

|    |                            |    |    |
|----|----------------------------|----|----|
| 28 | 40 °C instead of 25 °C     | 74 | 85 |
| 29 | under air in a closed vial | 68 | 94 |
| 30 | 2 equiv H <sub>2</sub> O   | 70 | 96 |

[a] Yields determined by GC using *n*-dodecane as the internal standard, the yield in parentheses is the isolated yield (0.20 mmol scale). Enantioselectivities were determined by chiral HPLC analysis.

**Supplementary Table 4: Effect of Ligands<sup>[a]</sup>.**

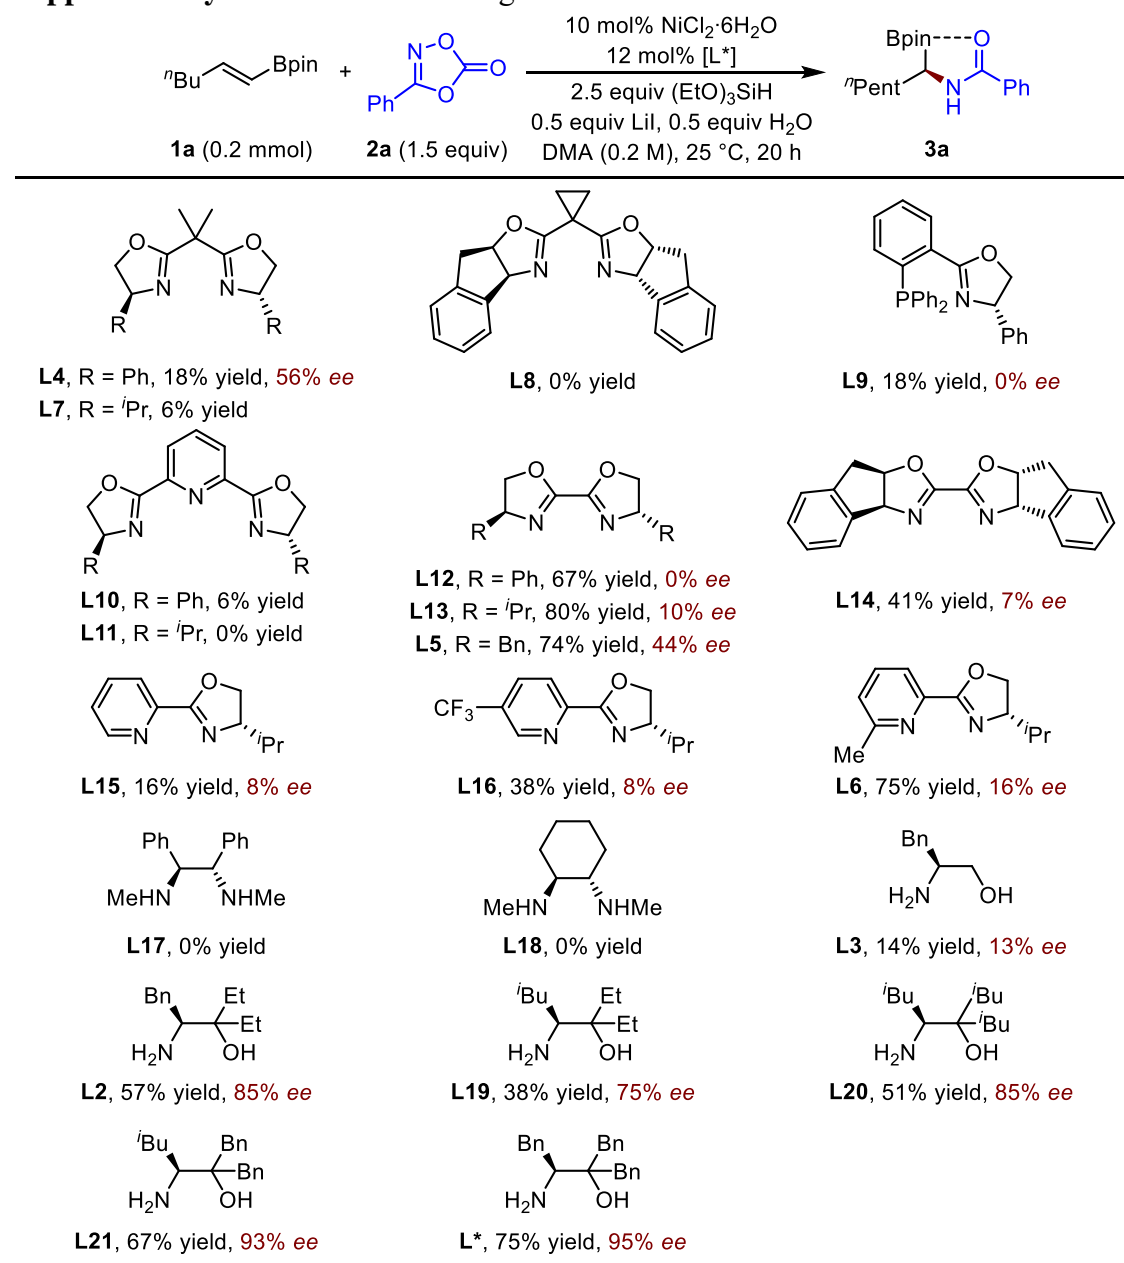

[a] Yields determined by GC using *n*-dodecane as the internal standard, the yield in parentheses is the isolated yield (0.20 mmol scale). Enantioselectivities were determined by chiral HPLC analysis.

**Supplementary Table 5:** Effect of other olefins under standard conditions<sup>[a]</sup>.

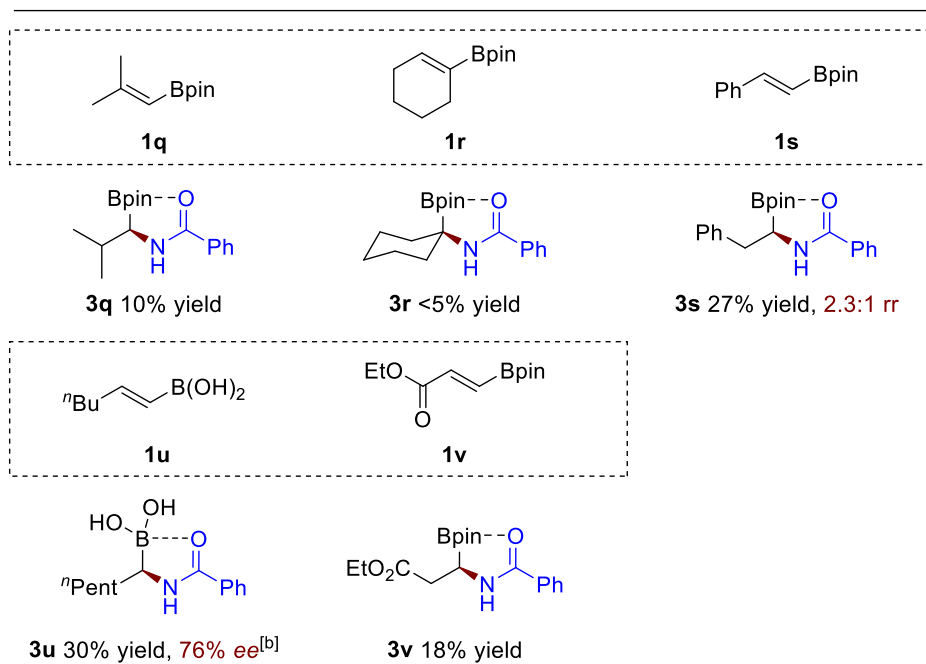

[a] reaction conditions were the same as **Figure 3**; [b] (MeO)<sub>2</sub>MeSiH was used instead of (EtO)<sub>3</sub>SiH, the product was isolated as **3a** after treatment with pinacol.





the mixture was allowed to warm to 30 °C and stirred for 24 hours. The reaction was quenched with H<sub>2</sub>O, extracted with Et<sub>2</sub>O, and concentrated under reduced pressure. The crude mixture was purified by silica gel chromatography (petroleum ether/EtOAc) to afford the (*E*)-alkenyl boronates.

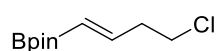

**(*E*)-2-(4-chlorobut-1-en-1-yl)-4,4,5,5-tetramethyl-1,3,2-dioxaborolane** (Figure 3, **1f**). From the 4-chlorobut-1-yne (0.89 g, 10.0 mmol), the title compound was prepared following the general procedure **B**. The crude material was purified by flash column chromatography (petroleum ether/EtOAc = 50:1) to provide the title compound as a colorless oil in 59% yield (1.27 g).

<sup>1</sup>H NMR (500 MHz, CDCl<sub>3</sub>) δ 6.57 (dt, *J* = 18.0, 6.4 Hz, 1H), 5.55 (dt, *J* = 18.0, 1.4 Hz, 1H), 3.57 (t, *J* = 7.0 Hz, 2H), 2.65 – 2.58 (m, 2H), 1.27 (s, 12H);

<sup>13</sup>C NMR (126 MHz, CDCl<sub>3</sub>) δ 149.0, 83.4, 43.0, 38.8, 24.9;

<sup>11</sup>B NMR (160 MHz, CDCl<sub>3</sub>) δ 29.7;

HRMS (ESI) calcd. for C<sub>10</sub>H<sub>18</sub>BClNaO<sub>2</sub> [M+Na]<sup>+</sup> *m/z* 239.0981, found 239.0978;

IR (neat, cm<sup>-1</sup>) 2977, 1638, 1360, 1318, 1139, 1005.

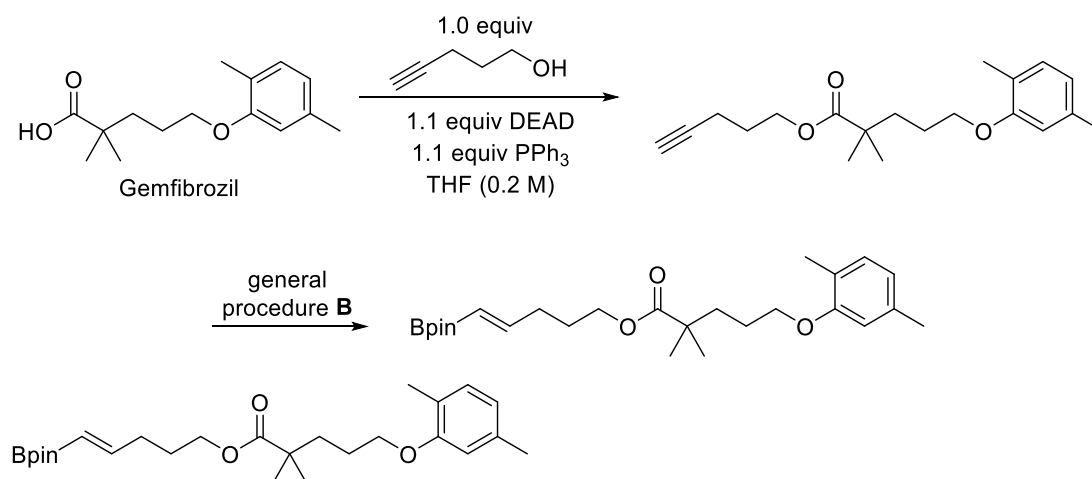

**(*E*)-5-(4,4,5,5-Tetramethyl-1,3,2-dioxaborolan-2-yl)pent-4-en-1-yl 5-(2,5-dimethylphenoxy)-2,2-dimethylpentanoate** (Figure 3, **1l**). To an anhydrous THF (40 mL) solution of gemfibrozil (10.0 mmol, 1.0 equiv, CAS 25812-30-0), pent-4-yn-1-ol

(0.84 g, 10 mmol, 1.0 equiv) and triphenylphosphine (PPh<sub>3</sub>, 2.89 g, 11.0 mmol, 1.1 equiv) was slowly added a THF solution (20 mL) of diethyl azodicarboxylate (DEAD, 1.92 g, 11.0 mmol, 1.1 equiv) over 30 min at 0 °C. The resulting mixture was then stirred at rt overnight. The reaction was quenched with brine and extracted with ethyl acetate. The combined organic layers were dried over anhydrous Na<sub>2</sub>SO<sub>4</sub>, filtered, and concentrated. After removal of solvent under reduced pressure, the crude material was purified by flash column chromatography to provide the corresponding alkyne as a yellow oil in 68% yield (2.15 g).

From the resulting alkyne (1.90 g, 6.0 mmol), the title compound was prepared following the general procedure **B**. The crude material was purified by flash column chromatography (petroleum ether/EtOAc = 20:1) to provide the title compound as a colorless oil in 53% yield (1.41 g).

<sup>1</sup>H NMR (500 MHz, CDCl<sub>3</sub>) δ 7.00 (d, *J* = 7.5 Hz, 1H), 6.70 – 6.54 (m, 3H), 5.47 (dt, *J* = 17.9, 1.5 Hz, 1H), 4.07 (t, *J* = 6.5 Hz, 2H), 3.96 – 3.87 (m, 2H), 2.30 (s, 3H), 2.27 – 2.19 (m, 2H), 2.30 (s, 3H), 1.80 – 1.68 (m, 6H), 1.26 (s, 12H), 1.21 (s, 6H);

<sup>13</sup>C NMR (126 MHz, CDCl<sub>3</sub>) δ 177.9, 157.1, 152.9, 136.5, 130.4, 123.7, 120.8, 112.1, 83.2, 68.1, 63.9, 42.2, 37.3, 32.2, 27.4, 25.3, 24.9, 21.5, 15.9;

<sup>11</sup>B NMR (160 MHz, CDCl<sub>3</sub>) δ 29.9;

HRMS (ESI) calcd. for C<sub>26</sub>H<sub>41</sub>BNaO<sub>5</sub> [M+Na]<sup>+</sup> *m/z* 467.2939, found 467.2926;

IR (neat, cm<sup>-1</sup>) 2977, 1726, 1639, 1363, 1142.

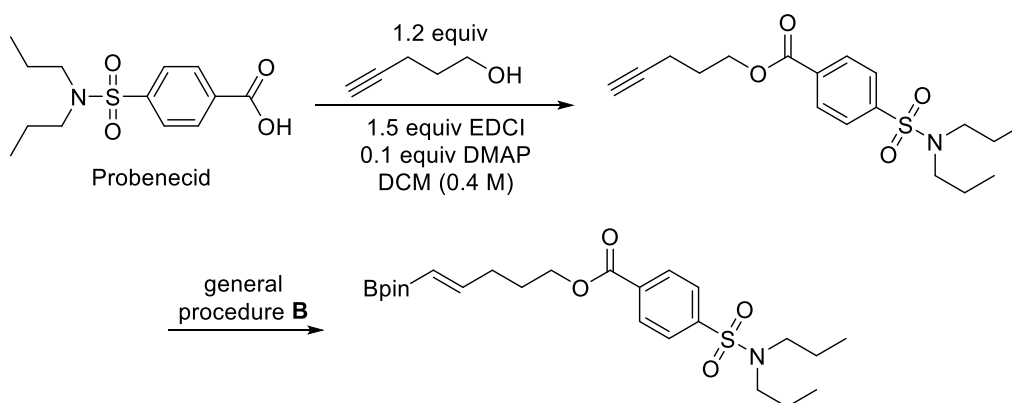

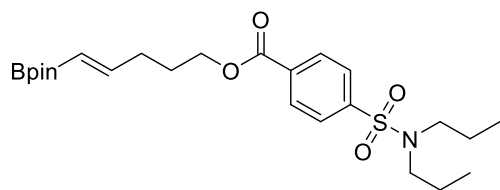

**(E)-5-(4,4,5,5-Tetramethyl-1,3,2-dioxaborolan-2-yl)pent-4-en-1-yl 4-(N,N-dipropylsulfamoyl)benzoate** (Figure 3, **1m**). The probenecid (2.85 g, 10 mmol, 1.0 equiv, CAS 57-66-9) was added to a solution of 1-(3-dimethylaminopropyl)-3-ethylcarbodiimide (EDCI, 2.88 g, 15 mmol, 1.5 equiv) and 4-dimethylaminopyridine (DMAP, 0.12 g, 1.0 mmol, 0.10 equiv) in CH<sub>2</sub>Cl<sub>2</sub> (25 mL) at 0 °C. Pent-4-yn-1-ol (1.01 g, 12 mmol, 1.2 equiv) was then added. The reaction mixture was allowed to warm to rt overnight. The solution was diluted with CH<sub>2</sub>Cl<sub>2</sub> and washed with 1 M HCl (aq.), saturated NaHCO<sub>3</sub> (aq.) and brine sequentially. The organic layer was dried over anhydrous Na<sub>2</sub>SO<sub>4</sub>. After removal of solvent under reduced pressure, the crude material was purified by flash column chromatography to provide the corresponding alkyne as a yellow oil in 84% yield (2.95 g).

From the resulting alkyne (2.81 g, 8.0 mmol), the title compound was prepared following the general procedure **B**. The crude material was purified by flash column chromatography (petroleum ether/EtOAc = 10:1) to provide the title compound as a white solid in 55% yield (2.10 g).

**<sup>1</sup>H NMR** (500 MHz, CDCl<sub>3</sub>) δ 8.14 (d, *J* = 8.6 Hz, 2H), 7.87 (d, *J* = 8.6 Hz, 2H), 6.65 (dt, *J* = 18.0, 6.4 Hz, 1H), 5.50 (dt, *J* = 17.9, 1.5 Hz, 1H), 4.36 (t, *J* = 6.5 Hz, 2H), 3.12 – 3.06 (m, 4H), 2.37 – 2.28 (m, 2H), 1.97 – 1.87 (m, 2H), 1.60 – 1.48 (m, 4H), 1.26 (s, 12H), 0.87 (t, *J* = 7.4 Hz, 6H);

**<sup>13</sup>C NMR** (126 MHz, CDCl<sub>3</sub>) δ 165.4, 152.5, 144.3, 133.8, 130.3, 127.1, 83.3, 65.2, 50.1, 32.2, 27.3, 24.9, 22.1, 11.3;

**<sup>11</sup>B NMR** (160 MHz, CDCl<sub>3</sub>) δ 30.3;

**HRMS** (ESI) calcd. for C<sub>24</sub>H<sub>38</sub>BNNaO<sub>6</sub>S [M+Na]<sup>+</sup> *m/z* 502.2405, found 502.2392;

**IR** (neat, cm<sup>-1</sup>) 2975, 1720, 1643, 1275, 1142, 601;

**m.p.** 63 – 65 °C.

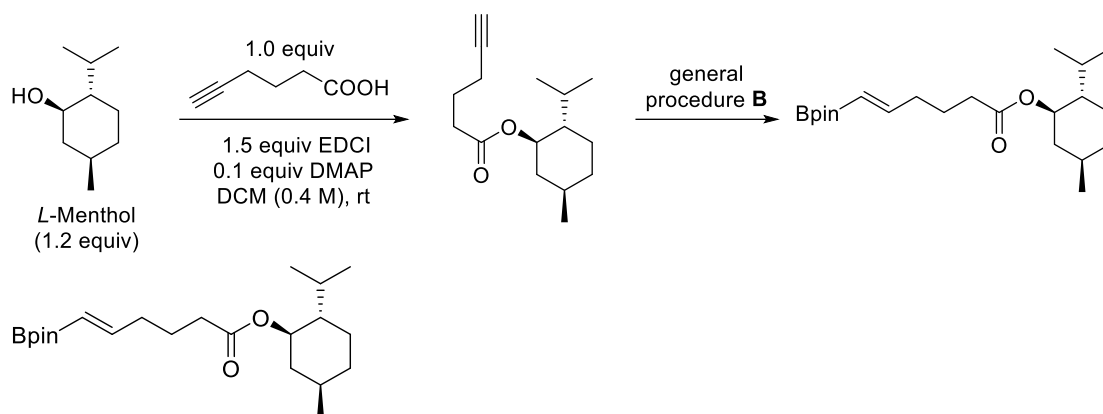

**(1*R*,2*S*,5*R*)-2-Isopropyl-5-methylcyclohexyl (*E*)-6-(4,4,5,5-tetramethyl-1,3,2-dioxaborolan-2-yl)hex-5-enoate** (Figure 3, **1n**). The hex-5-ynoic acid (1.12 g, 10 mmol, 1.0 equiv) was added to a solution of 1-(3-dimethylaminopropyl)-3-ethylcarbodiimide (EDCI, 2.88 g, 15 mmol, 1.5 equiv) and 4-dimethylaminopyridine (DMAP, 0.12 g, 1.0 mmol, 0.10 equiv) in CH<sub>2</sub>Cl<sub>2</sub> (25 mL) at 0 °C. *L*-Menthol (1.88 g, 12 mmol, 1.2 equiv, CAS 2216-51-5) was then added. The reaction mixture was allowed to warm to rt overnight. The solution was diluted with CH<sub>2</sub>Cl<sub>2</sub> and washed with 1 M HCl (aq.), saturated NaHCO<sub>3</sub> (aq.) and brine sequentially. The organic layer was dried over anhydrous Na<sub>2</sub>SO<sub>4</sub>. After removal of solvent under reduced pressure, the crude material was purified by flash column chromatography to provide the corresponding alkyne as a colorless oil in 80% yield (2.01 g).

From the resulting alkyne (1.88 g, 7.5 mmol), the title compound was prepared following the general procedure **B**. The crude material was purified by flash column chromatography (petroleum ether/EtOAc = 20:1) to provide the title compound as a colorless oil in 62% yield (1.76 g).

<sup>1</sup>H NMR (500 MHz, CDCl<sub>3</sub>) δ 6.59 (dt, *J* = 17.9, 6.4 Hz, 1H), 5.45 (dt, *J* = 17.9, 1.5 Hz, 1H), 4.67 (td, *J* = 10.9, 4.4 Hz, 1H), 2.32 – 2.24 (m, 2H), 2.22 – 2.14 (m, 2H), 2.00 – 1.93 (m, 1H), 1.90 – 1.80 (m, 1H), 1.79 – 1.71 (m, 2H), 1.71 – 1.63 (m, 2H), 1.54 – 1.42 (m, 1H), 1.39 – 1.31 (m, 1H), 1.26 (s, 12H), 1.10 – 0.99 (m, 1H), 0.99 – 0.90 (m, 1H), 0.91 – 0.81 (m, 7H), 0.75 (d, *J* = 7.0 Hz, 3H);

<sup>13</sup>C NMR (126 MHz, CDCl<sub>3</sub>) δ 173.2, 153.2, 83.2, 74.1, 47.2, 41.1, 35.2, 34.4, 34.3, 31.5, 26.4, 24.9, 23.8, 23.6, 22.2, 20.9, 16.4;

<sup>11</sup>B NMR (160 MHz, CDCl<sub>3</sub>) δ 29.9;

**HRMS** (ESI) calcd. for  $C_{22}H_{39}BNaO_4$   $[M+Na]^+$   $m/z$  401.2834, found 401.2823;

**IR** (neat,  $cm^{-1}$ ) 2955, 2929, 1728, 1639, 1362, 1143.

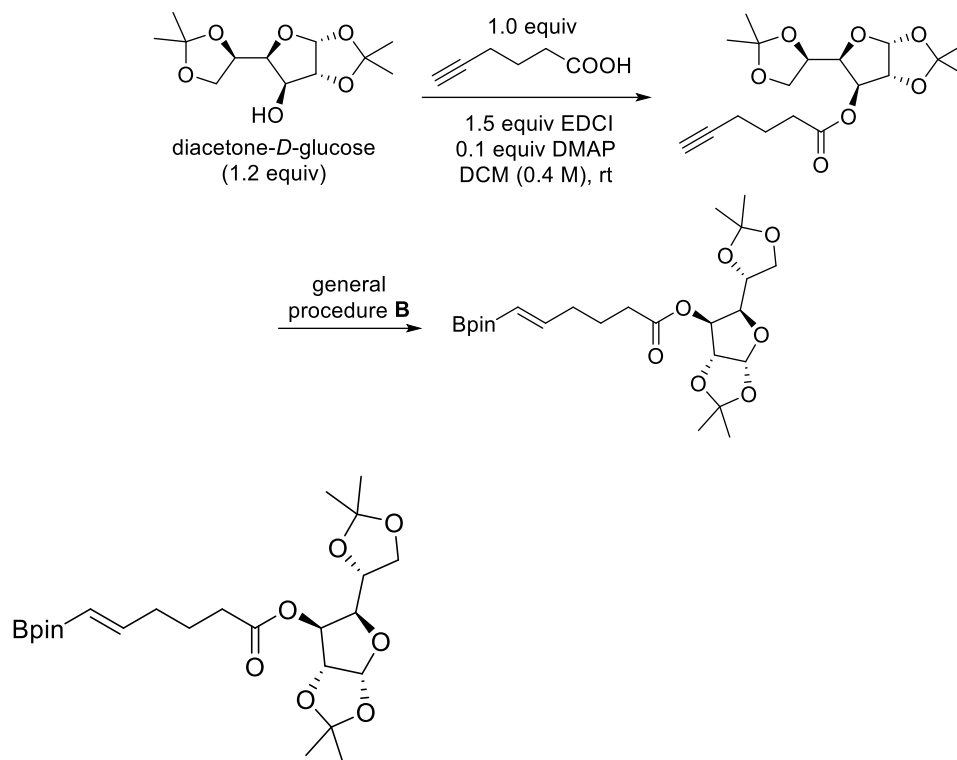

**(3*aR*,5*R*,6*S*,6*aR*)-5-((*R*)-2,2-dimethyl-1,3-dioxolan-4-yl)-2,2-dimethyltetrahydrofuro[2,3-*d*][1,3]dioxol-6-yl (*E*)-6-(4,4,5,5-tetramethyl-1,3,2-dioxaborolan-2-yl)hex-5-enoate** (Figure 3, **10**). The hex-5-ynoic acid (1.12 g, 10 mmol, 1.0 equiv) was added to a solution of 1-(3-dimethylaminopropyl)-3-ethylcarbodiimide (EDCI, 2.88 g, 15 mmol, 1.5 equiv) and 4-dimethylaminopyridine (DMAP, 0.12 g, 1.0 mmol, 0.10 equiv) in  $CH_2Cl_2$  (25 mL) at 0 °C. Diacetone-*D*-glucose (3.12 g, 12 mmol, 1.2 equiv, CAS 582-52-5) was then added. The reaction mixture was allowed to warm to rt overnight. The solution was diluted with  $CH_2Cl_2$  and washed with 1 M HCl (aq.), saturated  $NaHCO_3$  (aq.) and brine sequentially. The organic layer was dried over anhydrous  $Na_2SO_4$ . After removal of solvent under reduced pressure, the crude material was purified by flash column chromatography to provide the corresponding alkyne as a colorless oil in 86% yield (3.05 g).

From the resulting alkyne (3.01 g, 8.5 mmol), the title compound was prepared following the general procedure **B**. The crude material was purified by flash column

chromatography (petroleum ether/EtOAc = 5:1) to provide the title compound as a colorless oil in 57% yield (2.33 g).

**<sup>1</sup>H NMR** (500 MHz, CDCl<sub>3</sub>) δ 6.57 (dt, *J* = 18.0, 6.4 Hz, 1H), 5.86 (d, *J* = 3.7 Hz, 1H), 5.45 (dt, *J* = 17.9, 1.5 Hz, 1H), 5.26 (d, *J* = 1.9 Hz, 1H), 4.46 (d, *J* = 3.7 Hz, 1H), 4.23 – 4.16 (m, 2H), 4.11 – 4.05 (m, 1H), 4.03 – 3.98 (m, 1H), 2.41 – 2.30 (m, 2H), 2.24 – 2.15 (m, 2H), 1.82 – 1.73 (m, 2H), 1.51 (s, 3H), 1.40 (s, 3H), 1.32 – 1.29 (m, 6H), 1.26 (s, 12H);

**<sup>13</sup>C NMR** (126 MHz, CDCl<sub>3</sub>) δ 172.1, 152.8, 112.4, 109.5, 105.2, 83.5, 83.3, 80.0, 76.1, 72.6, 67.5, 34.9, 33.7, 27.0, 26.9, 26.4, 25.4, 24.9, 23.4;

**<sup>11</sup>B NMR** (160 MHz, CDCl<sub>3</sub>) δ 30.0;

**HRMS** (ESI) calcd. for C<sub>24</sub>H<sub>39</sub>BNaO<sub>9</sub> [M+Na]<sup>+</sup> *m/z* 505.2579, found 505.2577;

**IR** (neat, cm<sup>-1</sup>) 2981, 2936, 1745, 1638, 1363, 1142, 1073.

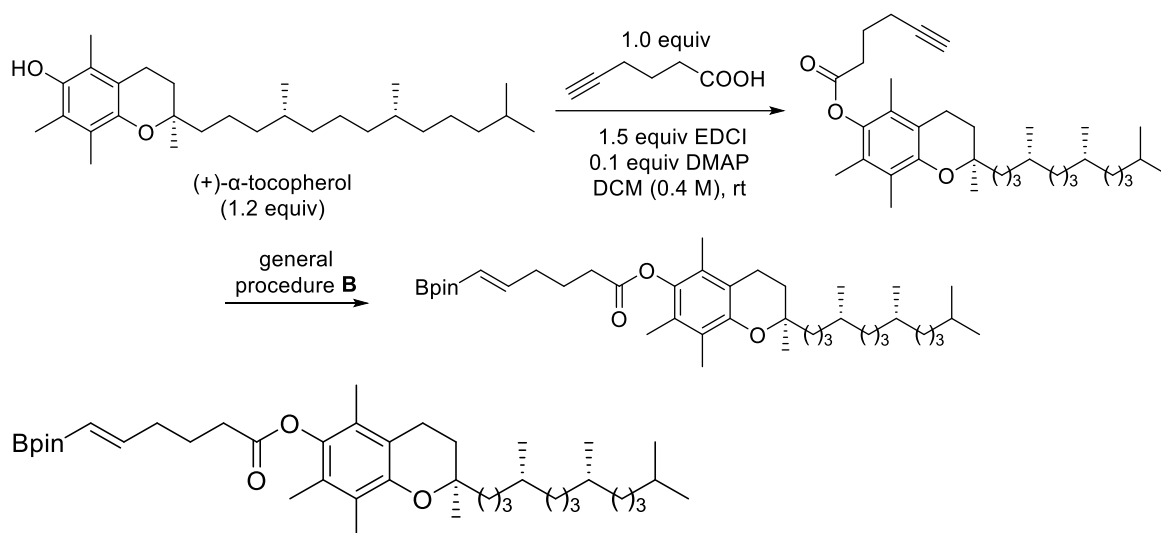

**(*R*)-2,5,7,8-tetramethyl-2-((4*R*,8*R*)-4,8,12-trimethyltridecyl)chroman-6-yl (*E*)-6-(4,4,5,5-tetramethyl-1,3,2-dioxaborolan-2-yl)hex-5-enoate** (Figure 3, **1p**). The hex-5-ynoic acid (1.12 g, 10 mmol, 1.0 equiv) was added to a solution of 1-(3-dimethylaminopropyl)-3-ethylcarbodiimide (EDCI, 2.88 g, 15 mmol, 1.5 equiv) and 4-dimethylaminopyridine (DMAP, 0.12 g, 1.0 mmol, 0.10 equiv) in CH<sub>2</sub>Cl<sub>2</sub> (25 mL) at 0 °C. (+)-α-Tocopherol (5.16 g, 12 mmol, 1.2 equiv, CAS 59-02-9) was then added. The reaction mixture was allowed to warm to rt overnight. The solution was diluted with CH<sub>2</sub>Cl<sub>2</sub> and washed with 1 M HCl (aq.), saturated NaHCO<sub>3</sub> (aq.) and brine

sequentially. The organic layer was dried over anhydrous Na<sub>2</sub>SO<sub>4</sub>. After removal of solvent under reduced pressure, the crude material was purified by flash column chromatography to provide the corresponding alkyne as a colorless oil in 87% yield (4.57 g).

From the resulting alkyne (4.46 g, 8.5 mmol), the title compound was prepared following the general procedure **B**. The crude material was purified by flash column chromatography (petroleum ether/EtOAc = 100:1) to provide the title compound as a colorless oil in 68% yield (3.78 g).

<sup>1</sup>H NMR (500 MHz, CDCl<sub>3</sub>) δ 6.64 (dt, *J* = 17.9, 6.5 Hz, 1H), 5.50 (dt, *J* = 17.9, 1.4 Hz, 1H), 2.64 – 2.55 (m, 4H), 2.35 – 2.27 (m, 2H), 2.08 (s, 3H), 2.00 (s, 3H), 1.98 – 1.89 (m, 5H), 1.85 – 1.70 (m, 2H), 1.58 – 1.48 (m, 3H), 1.46 – 1.32 (m, 4H), 1.33 – 1.21 (s, 23H), 1.17 – 1.02 (m, 6H), 0.90 – 0.82 (m, 12H);

<sup>13</sup>C NMR (126 MHz, CDCl<sub>3</sub>) δ 172.2, 153.0, 149.5, 140.6, 126.8, 125.0, 123.1, 117.5, 83.3, 75.2, 39.5, 37.6, 37.6, 37.4, 35.3, 33.7, 33.0, 32.9, 31.3, 28.1, 25.0, 24.9, 24.6, 23.9, 22.9, 22.8, 21.2, 20.8, 19.9, 19.8, 13.1, 12.3, 12.0;

<sup>11</sup>B NMR (160 MHz, CDCl<sub>3</sub>) δ 29.9;

HRMS (ESI) calcd. for C<sub>41</sub>H<sub>69</sub>BNaO<sub>5</sub> [M+Na]<sup>+</sup> *m/z* 675.5130, found 675.5128;

IR (neat, cm<sup>-1</sup>) 2926, 2868, 1753, 1638, 1362, 1133.

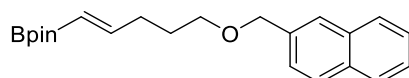

**(*E*)-4,4,5,5-Tetramethyl-2-(5-(naphthalen-2-ylmethoxy)pent-1-en-1-yl)-1,3,2-dioxaborolane** (Figure 4, **1t**). From 2-((pent-4-yn-1-yloxy)methyl)naphthalene (1.35 g, 6.0 mmol), the title compound was prepared following the general procedure **B**. The crude material was purified by flash column chromatography (petroleum ether/EtOAc = 20:1) to provide the title compound as a colorless oil in 64% yield (1.35 g).

<sup>1</sup>H NMR (500 MHz, CDCl<sub>3</sub>) δ 7.83 (d, *J* = 9.1 Hz, 3H), 7.77 (s, 1H), 7.49 – 7.43 (m, 3H), 6.65 (dt, *J* = 17.9, 6.4 Hz, 1H), 5.47 (dt, *J* = 17.9, 1.5 Hz, 1H), 4.66 (s, 2H), 3.53 (t, *J* = 6.5 Hz, 2H), 2.32 – 2.23 (m, 2H), 1.82 – 1.74 (m, 2H), 1.26 (s, 12H);

<sup>13</sup>C NMR (126 MHz, CDCl<sub>3</sub>) δ 153.9, 136.2, 133.4, 133.1, 128.3, 128.0, 127.8, 126.4,



126.2, 125.9, 83.2, 73.1, 69.9, 32.5, 28.4, 24.9;

**$^{11}\text{B}$  NMR** (160 MHz,  $\text{CDCl}_3$ )  $\delta$  30.0;

**HRMS** (ESI) calcd. for  $\text{C}_{22}\text{H}_{29}\text{BNaO}_3$   $[\text{M}+\text{Na}]^+$   $m/z$  375.2102, found 375.2093;

**IR** (neat,  $\text{cm}^{-1}$ ) 2978, 2935, 2856, 1639, 1362, 1143.

## b. Preparation of 1,4,2-dioxazol-5-ones

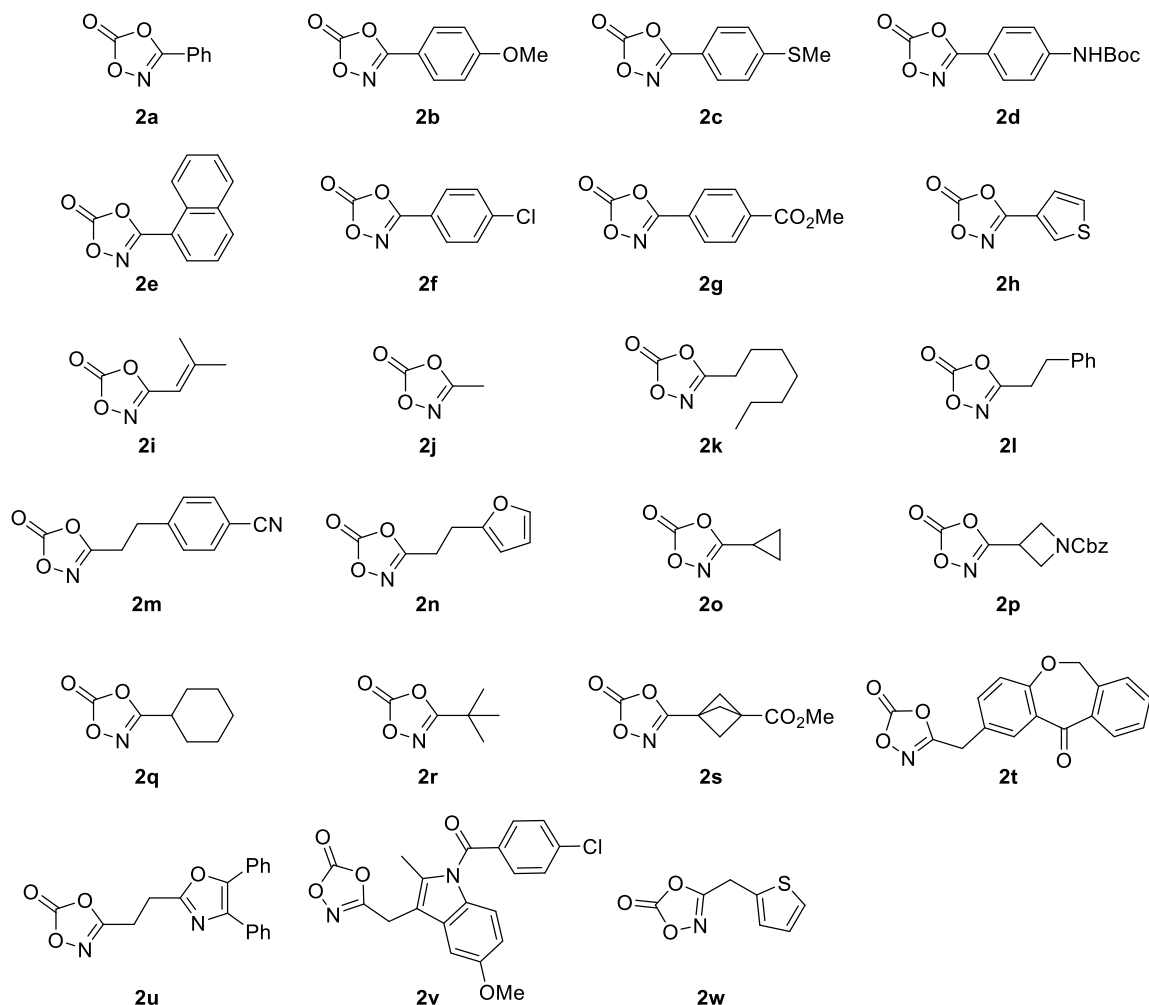

Compounds **2a**, **2b**, **2f**, **2k**, **2l**, **2s**, **2t** and **2v** were prepared according to reference 12. Compounds **2g**, **2j**, **2o**, **2q** and **2r** were prepared according to reference 13.

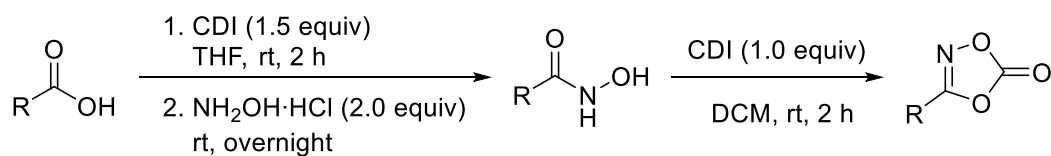

**General procedure C** for the synthesis of 1,4,2-dioxazol-5-ones<sup>12-14</sup>. 1,1'-Carbonyldiimidazole (CDI, 1.5 equiv) was added to a mixture of carboxylic acid (1.0 equiv.) in dry tetrahydrofuran (THF, 1.0 M) at rt. The reaction mixture was stirred for 2 hours. Afterward, hydroxylamine hydrochloride (2.0 equiv) was added. The resulting mixture was stirred overnight. The reaction mixture was diluted with 5% KHSO<sub>4</sub> (aq) and extracted with EtOAc. The combined organic layer was washed with water and

brine, dried over anhydrous Na<sub>2</sub>SO<sub>4</sub>, and concentrated in vacuo. The crude hydroxamic acid was used for next step without further purification.

To a stirred solution of hydroxamic acid (1.0 equiv) in freshly distilled dichloromethane, 1,1'-carbonyldiimidazole (1.0 equiv) was added in one portion at rt. After being stirred for 2 hours, the reaction mixture was quenched with 1 N HCl (aq.), and extracted with EtOAc. The combined organic phase was dried over anhydrous Na<sub>2</sub>SO<sub>4</sub>, filtered and concentrated in vacuo. The resulting residue was purified quickly by short silica pad (PE/Ea = 10:1 ~ 5:1) to give the desired 1,4,2-dioxazol-5-ones.

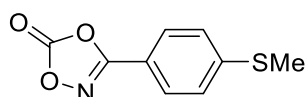

**3-(4-(Methylthio)phenyl)-1,4,2-dioxazol-5-one** (Figure 4, **2c**). From 4-(methylthio)benzoic acid (1.68 g, 10 mmol), the title compound was prepared following the general procedure **C**. The crude material was purified quickly by short silica pad (petroleum ether/EtOAc = 10:1) to provide the title compound as a white solid in 58% yield (1.21 g).

<sup>1</sup>H NMR (400 MHz, CDCl<sub>3</sub>) δ 7.73 (d, *J* = 8.8 Hz, 2H), 7.33 (d, *J* = 8.7 Hz, 2H), 2.54 (s, 3H);

<sup>13</sup>C NMR (101 MHz, CDCl<sub>3</sub>) δ 163.5, 154.0, 147.4, 126.8, 125.8, 115.9, 14.9;

HRMS (ESI) calcd. for C<sub>8</sub>H<sub>7</sub>NNaOS [M-CO<sub>2</sub>+Na]<sup>+</sup> *m/z* 116.0321, found 116.0317;

IR (neat, cm<sup>-1</sup>) 1824, 1605, 1360, 1097, 996, 750;

m.p. 115 – 116 °C.

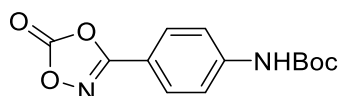

**tert-Butyl (4-(5-oxo-1,4,2-dioxazol-3-yl)phenyl)carbamate** (Figure 4, **2d**). From 4-((*tert*-butoxycarbonyl)amino)benzoic acid (2.37 g, 10 mmol), the title compound was prepared following the general procedure **C**. The crude material was purified quickly by short silica pad (petroleum ether/EtOAc = 8:1) to provide the title compound as a

white solid in 47% yield (1.31 g).

**<sup>1</sup>H NMR** (400 MHz, CDCl<sub>3</sub>) δ 7.77 (d, *J* = 8.9 Hz, 2H), 7.55 (d, *J* = 8.9 Hz, 2H), 6.77 (s, 1H), 1.53 (s, 9H);

**<sup>13</sup>C NMR** (101 MHz, CDCl<sub>3</sub>) δ 163.4, 154.1, 152.1, 143.7, 128.0, 118.4, 114.0, 81.9, 28.4;

**HRMS** (ESI) calcd. for C<sub>12</sub>H<sub>14</sub>N<sub>2</sub>NaO<sub>3</sub> [M-CO<sub>2</sub>+Na]<sup>+</sup> *m/z* 257.0897, found 257.0893;

**IR** (neat, cm<sup>-1</sup>) 3355, 1860, 1698, 1613, 1502, 1155, 757;

**m.p.** 159 – 160 °C.

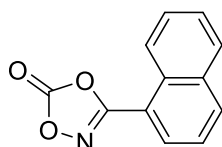

**3-(naphthalen-1-yl)-1,4,2-dioxazol-5-one** (Figure 4, **2e**). From 1-naphthoic acid (3.44 g, 20 mmol), the title compound was prepared following the general procedure **C**. The crude material was purified quickly by short silica pad (petroleum ether/EtOAc = 8:1) to provide the title compound as a white solid in 27% yield (1.15 g).

**<sup>1</sup>H NMR** (500 MHz, CDCl<sub>3</sub>) δ 8.79 – 8.71 (m, 1H), 8.13 (d, *J* = 8.3 Hz, 1H), 8.06 (dd, *J* = 7.3, 1.2 Hz, 1H), 7.97 (d, *J* = 8.2 Hz, 1H), 7.74 – 7.68 (m, 1H), 7.67 – 7.56 (m, 2H);

**<sup>13</sup>C NMR** (126 MHz, CDCl<sub>3</sub>) δ 164.1, 153.6, 134.9, 133.9, 129.6, 129.5, 129.3, 129.1, 127.4, 125.5, 124.9, 116.7;

**HRMS** (ESI) calcd. for C<sub>11</sub>H<sub>8</sub>NO [M-CO<sub>2</sub>+H]<sup>+</sup> *m/z* 170.0601, found 170.0596;

**IR** (neat, cm<sup>-1</sup>) 1809, 1321, 1002, 759;

**m.p.** 53 – 54 °C.

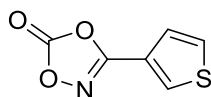

**3-(Thiophen-3-yl)-1,4,2-dioxazol-5-one** (Figure 4, **2h**). From thiophene-3-carboxylic acid (1.28 g, 10 mmol), the title compound was prepared following the general procedure **C**. The crude material was purified quickly by short silica pad (petroleum ether/EtOAc = 8:1) to provide the title compound as a white solid in 72% yield (1.22

g). Spectral data match those previously reported<sup>15</sup>.

**<sup>1</sup>H NMR** (400 MHz, CDCl<sub>3</sub>) δ 8.07 – 7.99 (m, 1H), 7.56 – 7.45 (m, 2H);

**<sup>13</sup>C NMR** (101 MHz, CDCl<sub>3</sub>) δ 160.5, 153.7, 130.6, 128.7, 124.8, 121.1.

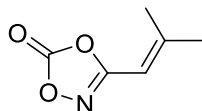

**3-(2-Methylprop-1-en-1-yl)-1,4,2-dioxazol-5-one** (Figure 4, **2i**). From 3-methylbut-2-enoic acid (1.00 g, 10 mmol), the title compound was prepared following the general procedure **C**. The crude material was purified quickly by short silica pad (petroleum ether/EtOAc = 10:1) to provide the title compound as a yellow liquid in 55% yield (0.78 g).

**<sup>1</sup>H NMR** (500 MHz, CDCl<sub>3</sub>) δ 5.83 – 5.74 (m, 1H), 2.13 (d, *J* = 0.9 Hz, 3H), 2.04 (d, *J* = 1.3 Hz, 3H);

**<sup>13</sup>C NMR** (126 MHz, CDCl<sub>3</sub>) δ 163.0, 156.6, 154.0, 104.8, 27.8, 21.8;

**HRMS** (ESI) calcd. for C<sub>5</sub>H<sub>8</sub>NO [M–CO<sub>2</sub>+H]<sup>+</sup> *m/z* 98.0601, found 98.0602;

**IR** (neat, cm<sup>-1</sup>) 1830, 1656, 1284, 1154, 984, 761.

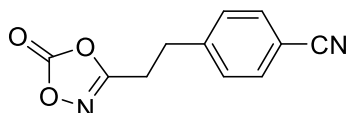

**4-(2-(5-Oxo-1,4,2-dioxazol-3-yl)ethyl)benzonitrile** (Figure 4, **2m**). From 3-(4-cyanophenyl)propanoic acid (1.75 g, 10 mmol), the title compound was prepared following the general procedure **C**. The crude material was purified quickly by short silica pad (petroleum ether/EtOAc = 5:1) to provide the title compound as a white solid in 79% yield (1.71 g).

**<sup>1</sup>H NMR** (400 MHz, CDCl<sub>3</sub>) δ 7.64 (d, *J* = 8.3 Hz, 2H), 7.34 (d, *J* = 8.3 Hz, 2H), 3.12 (t, *J* = 7.6 Hz, 2H), 3.02 – 2.93 (m, 2H);

**<sup>13</sup>C NMR** (101 MHz, CDCl<sub>3</sub>) δ 165.3, 153.8, 143.4, 132.9, 129.2, 118.6, 111.5, 30.4, 26.2;

**HRMS** (ESI) calcd. for C<sub>10</sub>H<sub>8</sub>N<sub>2</sub>NaO [M–CO<sub>2</sub>+Na]<sup>+</sup> *m/z* 195.0529, found 195.0524;

**IR** (neat,  $\text{cm}^{-1}$ ) 2231, 1826, 1637, 1148, 989, 756, 558;

**m.p.** 82 – 83 °C.

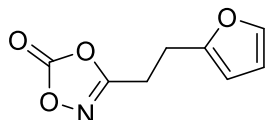

**3-(2-(Furan-2-yl)ethyl)-1,4,2-dioxazol-5-one** (Figure 4, **2n**). From 3-(furan-2-yl)propanoic acid (1.40 g, 10 mmol), the title compound was prepared following the general procedure **C**. The crude material was purified quickly by short silica pad (petroleum ether/EtOAc = 5:1) to provide the title compound as a white solid in 72% yield (1.30 g).

**<sup>1</sup>H NMR** (500 MHz,  $\text{CDCl}_3$ )  $\delta$  7.34 (dd,  $J = 1.8, 0.6$  Hz, 1H), 6.30 (dd,  $J = 3.2, 1.9$  Hz, 1H), 6.15 – 6.06 (m, 1H), 3.08 (t,  $J = 7.3$  Hz, 2H), 3.03 – 2.94 (m, 2H);

**<sup>13</sup>C NMR** (126 MHz,  $\text{CDCl}_3$ )  $\delta$  165.7, 154.1, 151.4, 142.2, 110.6, 106.8, 24.1, 23.3;

**HRMS** (ESI) calcd. for  $\text{C}_7\text{H}_7\text{NNaO}_2$  [ $\text{M}-\text{CO}_2+\text{Na}$ ] $^+$   $m/z$  160.0369, found 160.0365;

**IR** (neat,  $\text{cm}^{-1}$ ) 1819, 1641, 1152, 983, 758;

**m.p.** 50 – 51 °C.

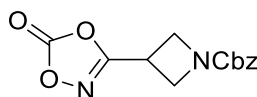

**Benzyl 3-(5-oxo-1,4,2-dioxazol-3-yl)azetidine-1-carboxylate** (Figure 4, **2p**). From 1-((benzyloxy)carbonyl)azetidine-3-carboxylic acid (2.35 g, 10 mmol), the title compound was prepared following the general procedure **C**. The crude material was purified quickly by short silica pad (petroleum ether/EtOAc = 3:1) to provide the title compound as a white solid in 63% yield (1.74 g).

**<sup>1</sup>H NMR** (500 MHz,  $\text{CDCl}_3$ )  $\delta$  7.42 – 7.29 (m, 5H), 5.12 (s, 2H), 4.37 (t,  $J = 9.0$  Hz, 2H), 4.26 (dd,  $J = 9.1, 6.0$  Hz, 2H), 3.84 – 3.73 (m, 1H);

**<sup>13</sup>C NMR** (126 MHz,  $\text{CDCl}_3$ )  $\delta$  165.6, 156.0, 153.6, 136.1, 128.7, 128.5, 128.3, 67.4, 51.3, 24.7;

**HRMS** (ESI) calcd. for  $\text{C}_{12}\text{H}_{12}\text{N}_2\text{NaO}_3$  [ $\text{M}-\text{CO}_2+\text{Na}$ ] $^+$   $m/z$  255.0740, found 255.0733;

**IR** (neat,  $\text{cm}^{-1}$ ) 1820, 1708, 1356, 1131, 990, 760, 732;

**m.p.** 110 – 111 °C.

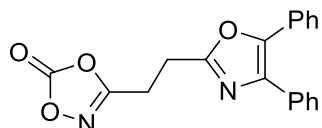

**3-(2-(4,5-Diphenyloxazol-2-yl)ethyl)-1,4,2-dioxazol-5-one** (Figure 4, **2u**). From 3-(4,5-diphenyloxazol-2-yl)propanoic acid (2.93 g, 10 mmol), the title compound was prepared following the general procedure **C**. The crude material was purified quickly by short silica pad (petroleum ether/EtOAc = 2:1) to provide the title compound as a white solid in 81% yield (2.71 g).

**<sup>1</sup>H NMR** (500 MHz,  $\text{CDCl}_3$ )  $\delta$  7.66 – 7.59 (m, 2H), 7.59 – 7.54 (m, 2H), 7.41 – 7.31 (m, 6H), 3.35 – 3.21 (m, 4H);

**<sup>13</sup>C NMR** (126 MHz,  $\text{CDCl}_3$ )  $\delta$  165.4, 159.5, 154.0, 146.2, 135.4, 132.1, 128.9, 128.9, 128.8, 128.7, 128.4, 128.0, 126.7, 23.1, 22.5;

**HRMS** (ESI) calcd. for  $\text{C}_{18}\text{H}_{14}\text{N}_2\text{NaO}_2$  [ $\text{M}-\text{CO}_2+\text{Na}$ ]<sup>+</sup>  $m/z$  313.0948, found 313.0941;

**IR** (neat,  $\text{cm}^{-1}$ ) 1869, 1829, 1157, 991, 757, 694;

**m.p.** 76 – 77 °C.

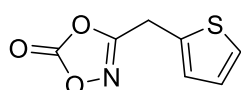

**3-(Thiophen-2-ylmethyl)-1,4,2-dioxazol-5-one** (Figure 5, **2w**). From 2-(thiophen-2-yl)acetic acid (1.42 g, 10 mmol), the title compound was prepared following the general procedure **C**. The crude material was purified quickly by short silica pad (petroleum ether/EtOAc = 8:1) to provide the title compound as a orange solid in 62% yield (1.14 g).

**<sup>1</sup>H NMR** (500 MHz,  $\text{CDCl}_3$ )  $\delta$  7.30 (dd,  $J = 5.1, 1.2$  Hz, 1H), 7.08 – 6.97 (m, 2H), 4.17 (s, 2H);

**<sup>13</sup>C NMR** (126 MHz,  $\text{CDCl}_3$ )  $\delta$  164.5, 153.8, 131.0, 128.4, 127.7, 126.6, 25.7;

**HRMS** (ESI) calcd. for  $\text{C}_6\text{H}_6\text{NOS}$  [ $\text{M}-\text{CO}_2+\text{H}$ ]<sup>+</sup>  $m/z$  140.0165, found 140.0161;

IR (neat,  $\text{cm}^{-1}$ ) 1817, 1632, 1341, 1150, 988, 712;

m.p. 51 – 52 °C.

### c. Preparation of L\*

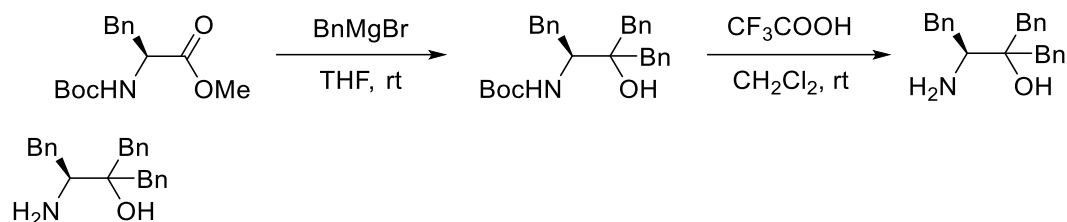

#### (S)-3-Amino-2-benzyl-1,4-diphenylbutan-2-ol (L\*).

Under N<sub>2</sub> atmosphere, methyl (*tert*-butoxycarbonyl)-*L*-phenylalaninate (2.23 g, 8.0 mmol, 1.0 equiv) was dissolved in THF (10 mL). The solution was cooled to 0 °C, and benzylmagnesium chloride (40 mL, 1.0 M in THF, 5.0 equiv) was added dropwise over 15 min. The resulting mixture was warmed to rt and stirred for 24 h at rt. Completion of the reaction was monitored by TLC. The solution was cooled to 0 °C again and carefully quenched with a saturated aqueous solution of NH<sub>4</sub>Cl. The mixture was extracted with Et<sub>2</sub>O and washed with brine, dried over Na<sub>2</sub>SO<sub>4</sub>, filtered, and concentrated under reduced pressure to give the crude product. The crude material was purified by flash column chromatography (petroleum ether/EtOAc = 50:1) to provide *tert*-butyl (*S*)-(3-benzyl-3-hydroxy-1,4-diphenylbutan-2-yl)carbamate as a sticky oil or white solid in 38% yield (1.31 g).

CF<sub>3</sub>COOH (2.0 mL) was added to a solution of *tert*-butyl (*S*)-(3-benzyl-3-hydroxy-1,4-diphenylbutan-2-yl)carbamate (1.31 g, 3.0 mmol, 1.0 equiv) in CH<sub>2</sub>Cl<sub>2</sub> (10 mL), and the mixture was stirred at rt. Completion of the reaction was monitored by TLC. The solution was cooled to 0 °C, and saturated aqueous NaHCO<sub>3</sub> was added carefully. The mixture was extracted with Et<sub>2</sub>O and washed with saturated aqueous K<sub>2</sub>CO<sub>3</sub>, brine, dried over Na<sub>2</sub>SO<sub>4</sub>, filtered, and concentrated under reduced pressure to give the crude product. After recrystallization (petroleum ether/EtOAc), (*S*)-3-amino-2-benzyl-1,4-diphenylbutan-2-ol was obtained as a white solid in 85% yield (0.85 g).

<sup>1</sup>H NMR (500 MHz, CD<sub>3</sub>CN) δ 7.40 – 7.14 (m, 13H), 7.09 – 7.03 (m, 2H), 3.90 (s, 1H),



3.23 (d,  $J = 12.5$  Hz, 1H), 2.95 (d,  $J = 13.3$  Hz, 1H), 2.90 – 2.78 (m, 2H), 2.68 (d,  $J = 13.3$  Hz, 1H), 2.52 – 2.38 (m, 2H), 1.04 (s, 2H);

$^{13}\text{C NMR}$  (126 MHz,  $\text{CD}_3\text{CN}$ )  $\delta$  141.6, 139.4, 139.3, 132.2, 131.9, 130.1, 129.3, 128.8, 128.7, 127.1, 127.0, 126.9, 76.2, 59.4, 42.4, 42.3, 39.6;

**HRMS** (ESI) calcd. for  $\text{C}_{23}\text{H}_{26}\text{NO}$   $[\text{M}+\text{H}]^+$   $m/z$  332.2009, found 332.2000;

**IR** (neat,  $\text{cm}^{-1}$ ) 3377, 3317, 3026, 2937, 1493, 752, 696;

**m.p.** 133 – 135 °C;

$[\alpha]_{\text{D}}^{23} = +17.1$  ( $c = 0.79$ ,  $\text{CHCl}_3$ ).

II. Supplementary Figures  
1. NMR Spectroscopic Data

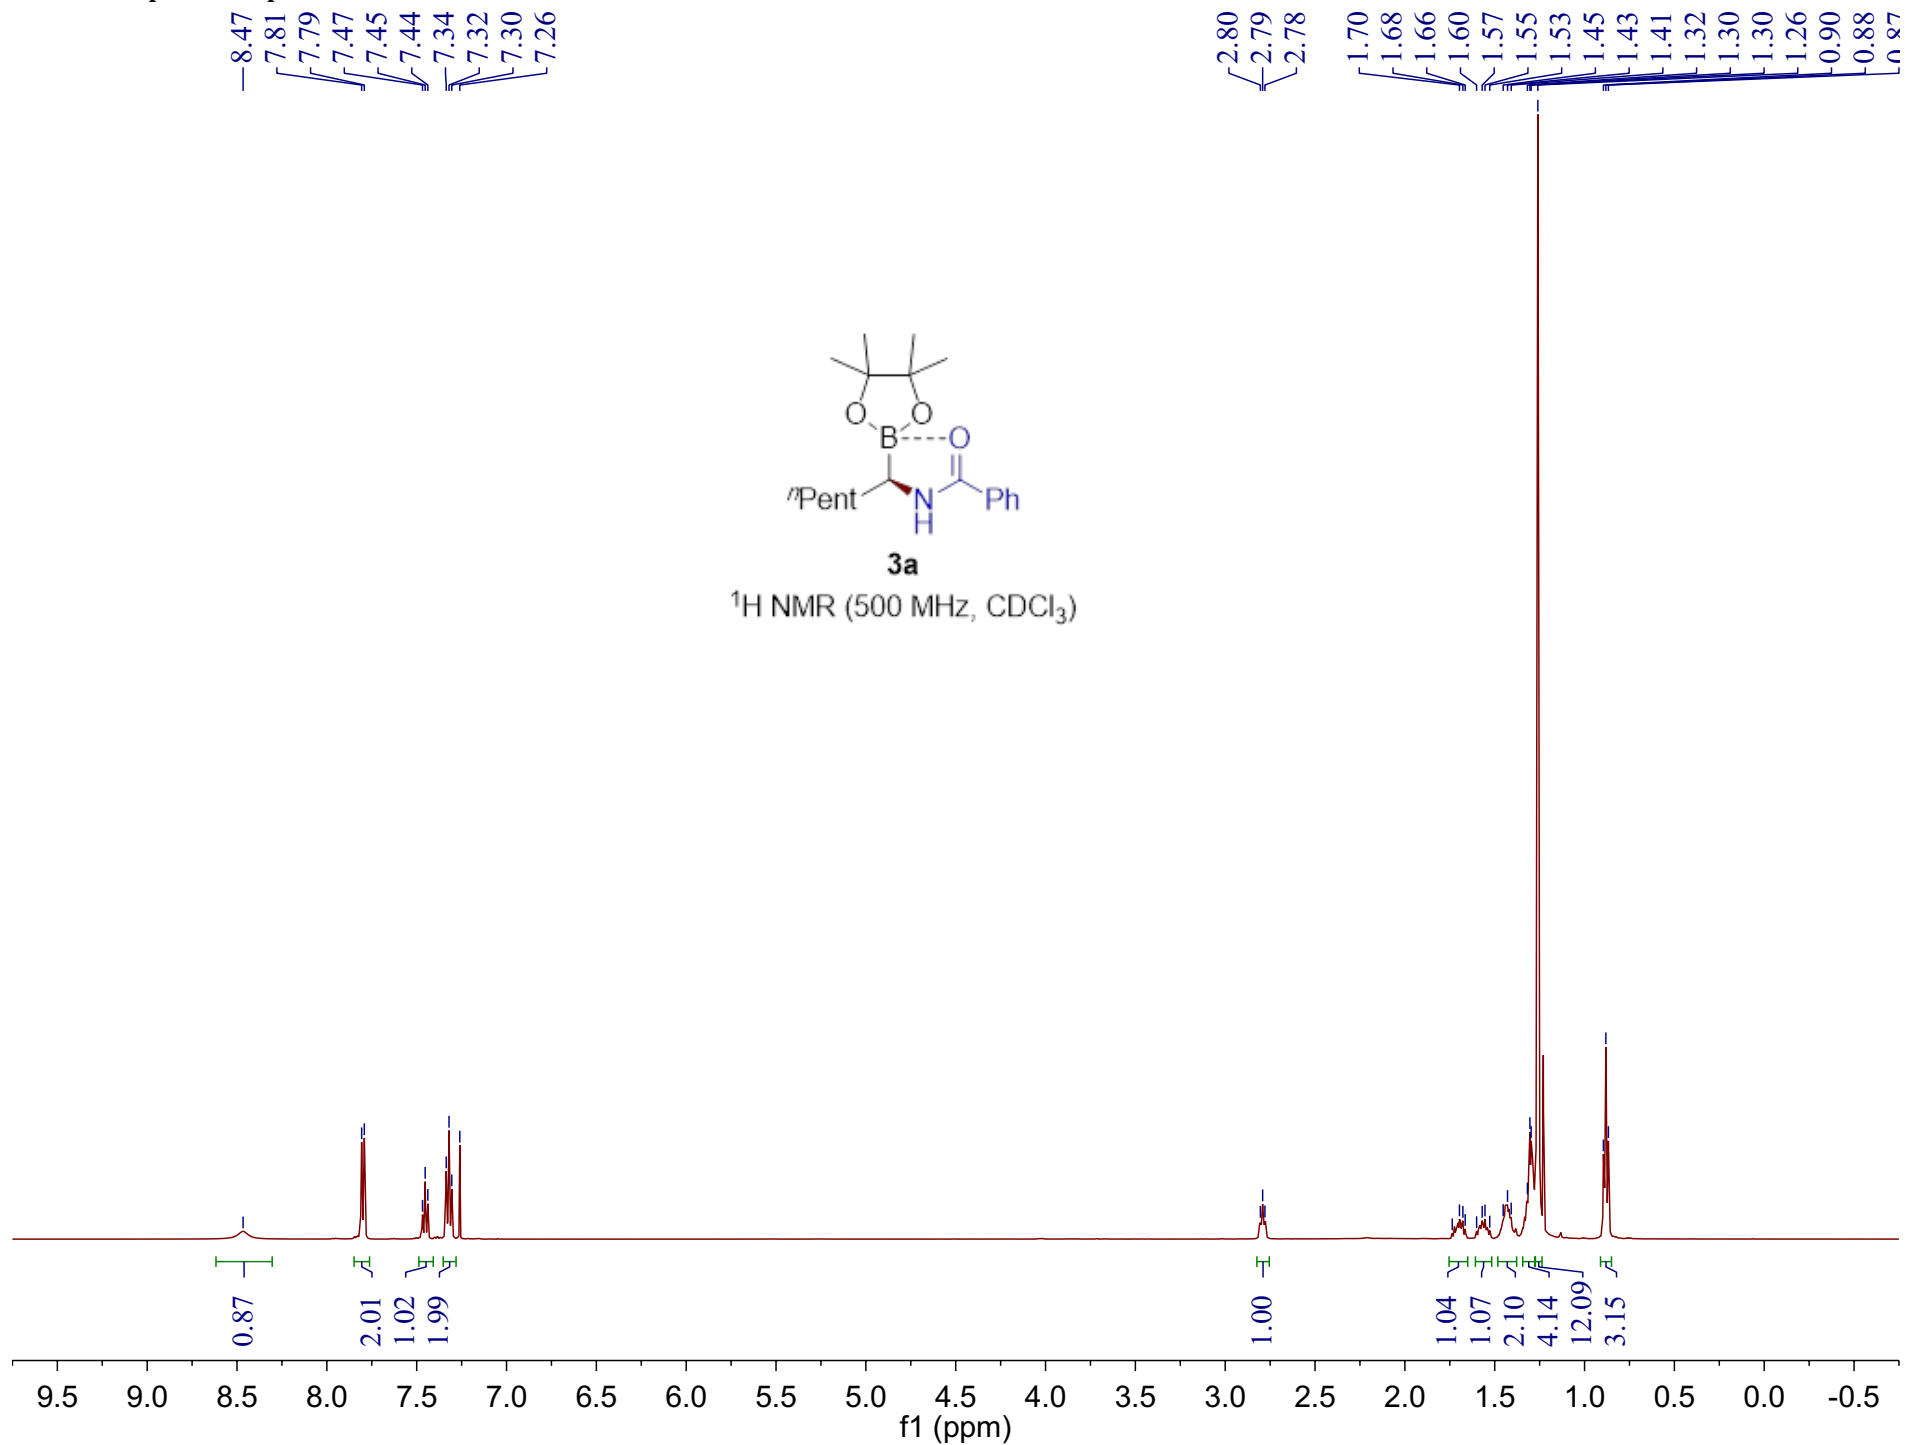

Supplementary Figure 2: <sup>1</sup>H NMR (500 MHz, CDCl<sub>3</sub>) spectrum of **3a**.

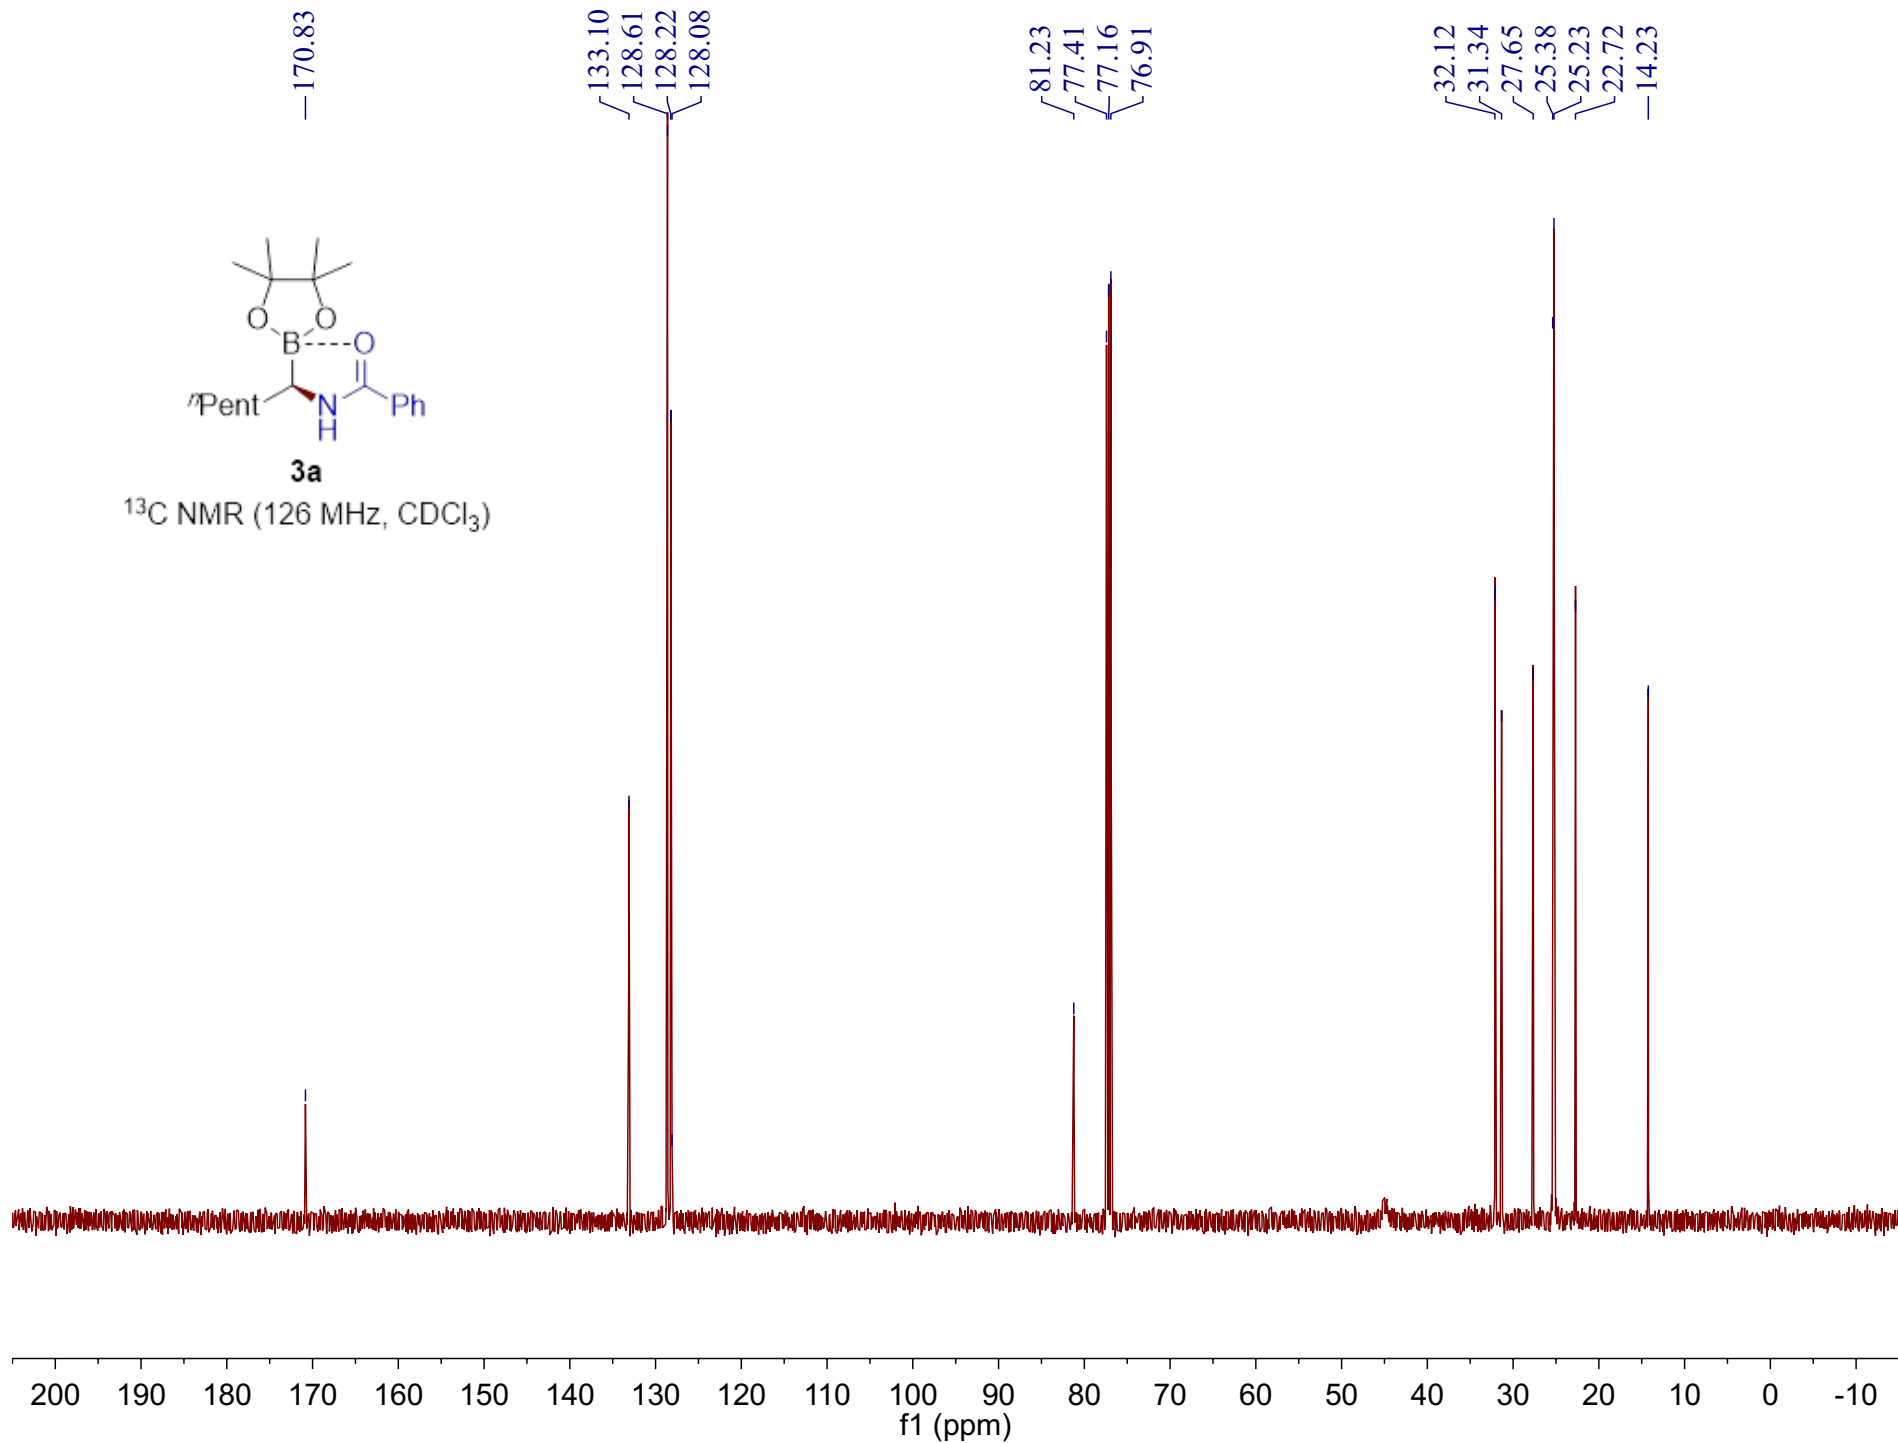

**Supplementary Figure 3:** <sup>13</sup>C NMR (126 MHz, CDCl<sub>3</sub>) spectrum of **3a**.

-17.83

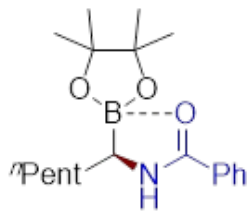

**3a**

$^{11}\text{B}$  NMR (160 MHz,  $\text{CDCl}_3$ )

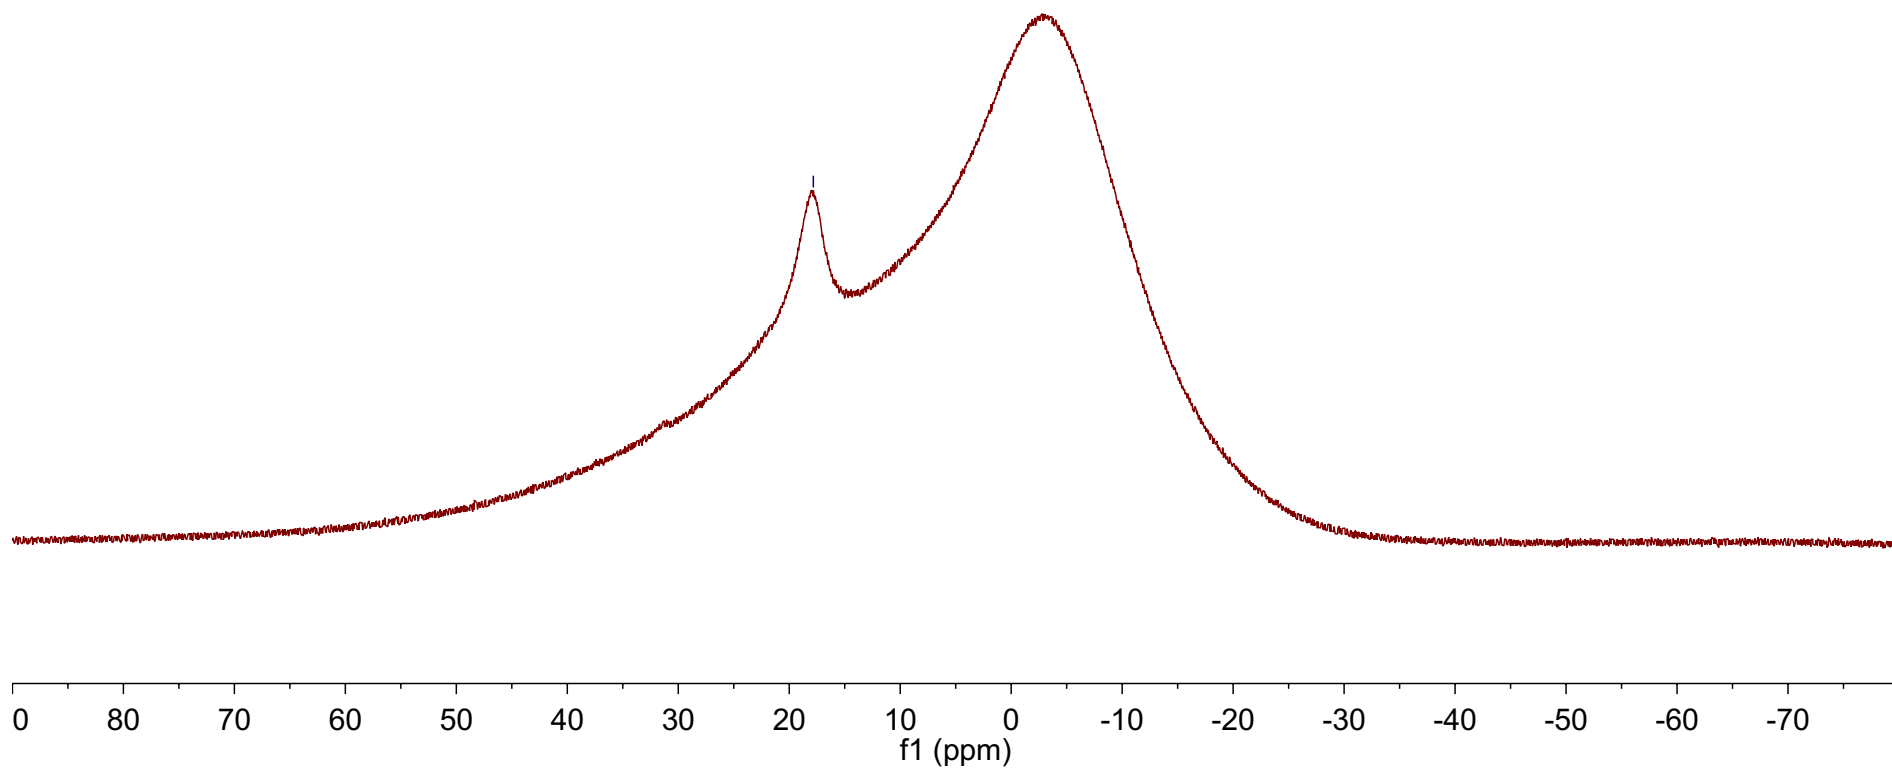

**Supplementary Figure 4:**  $^{11}\text{B}$  NMR (160 MHz,  $\text{CDCl}_3$ ) spectrum of **3a**.

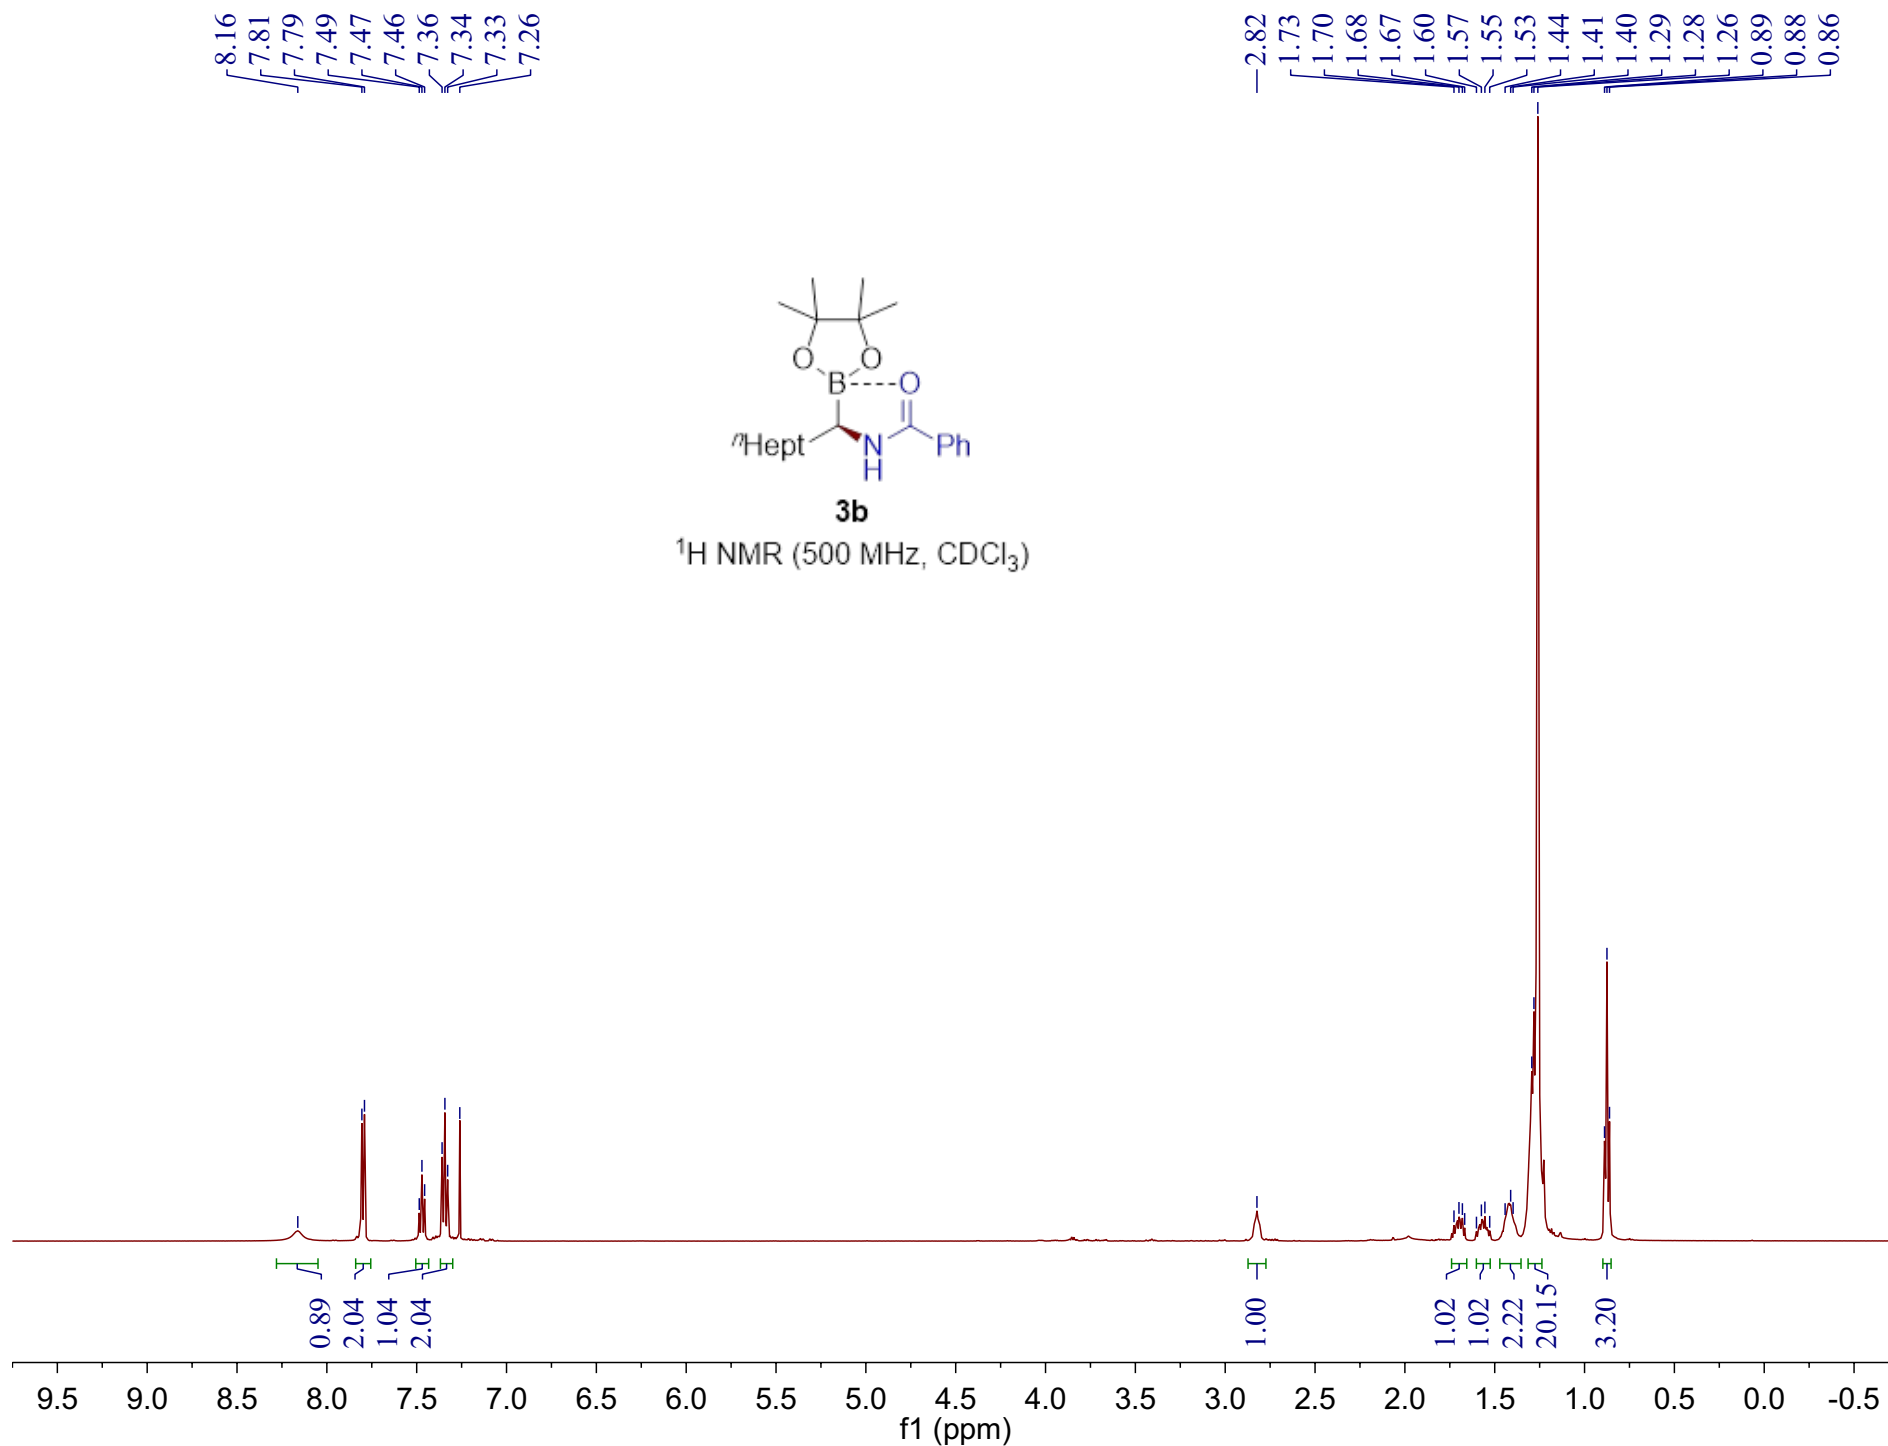

Supplementary Figure 5: <sup>1</sup>H NMR (500 MHz, CDCl<sub>3</sub>) spectrum of **3b**.

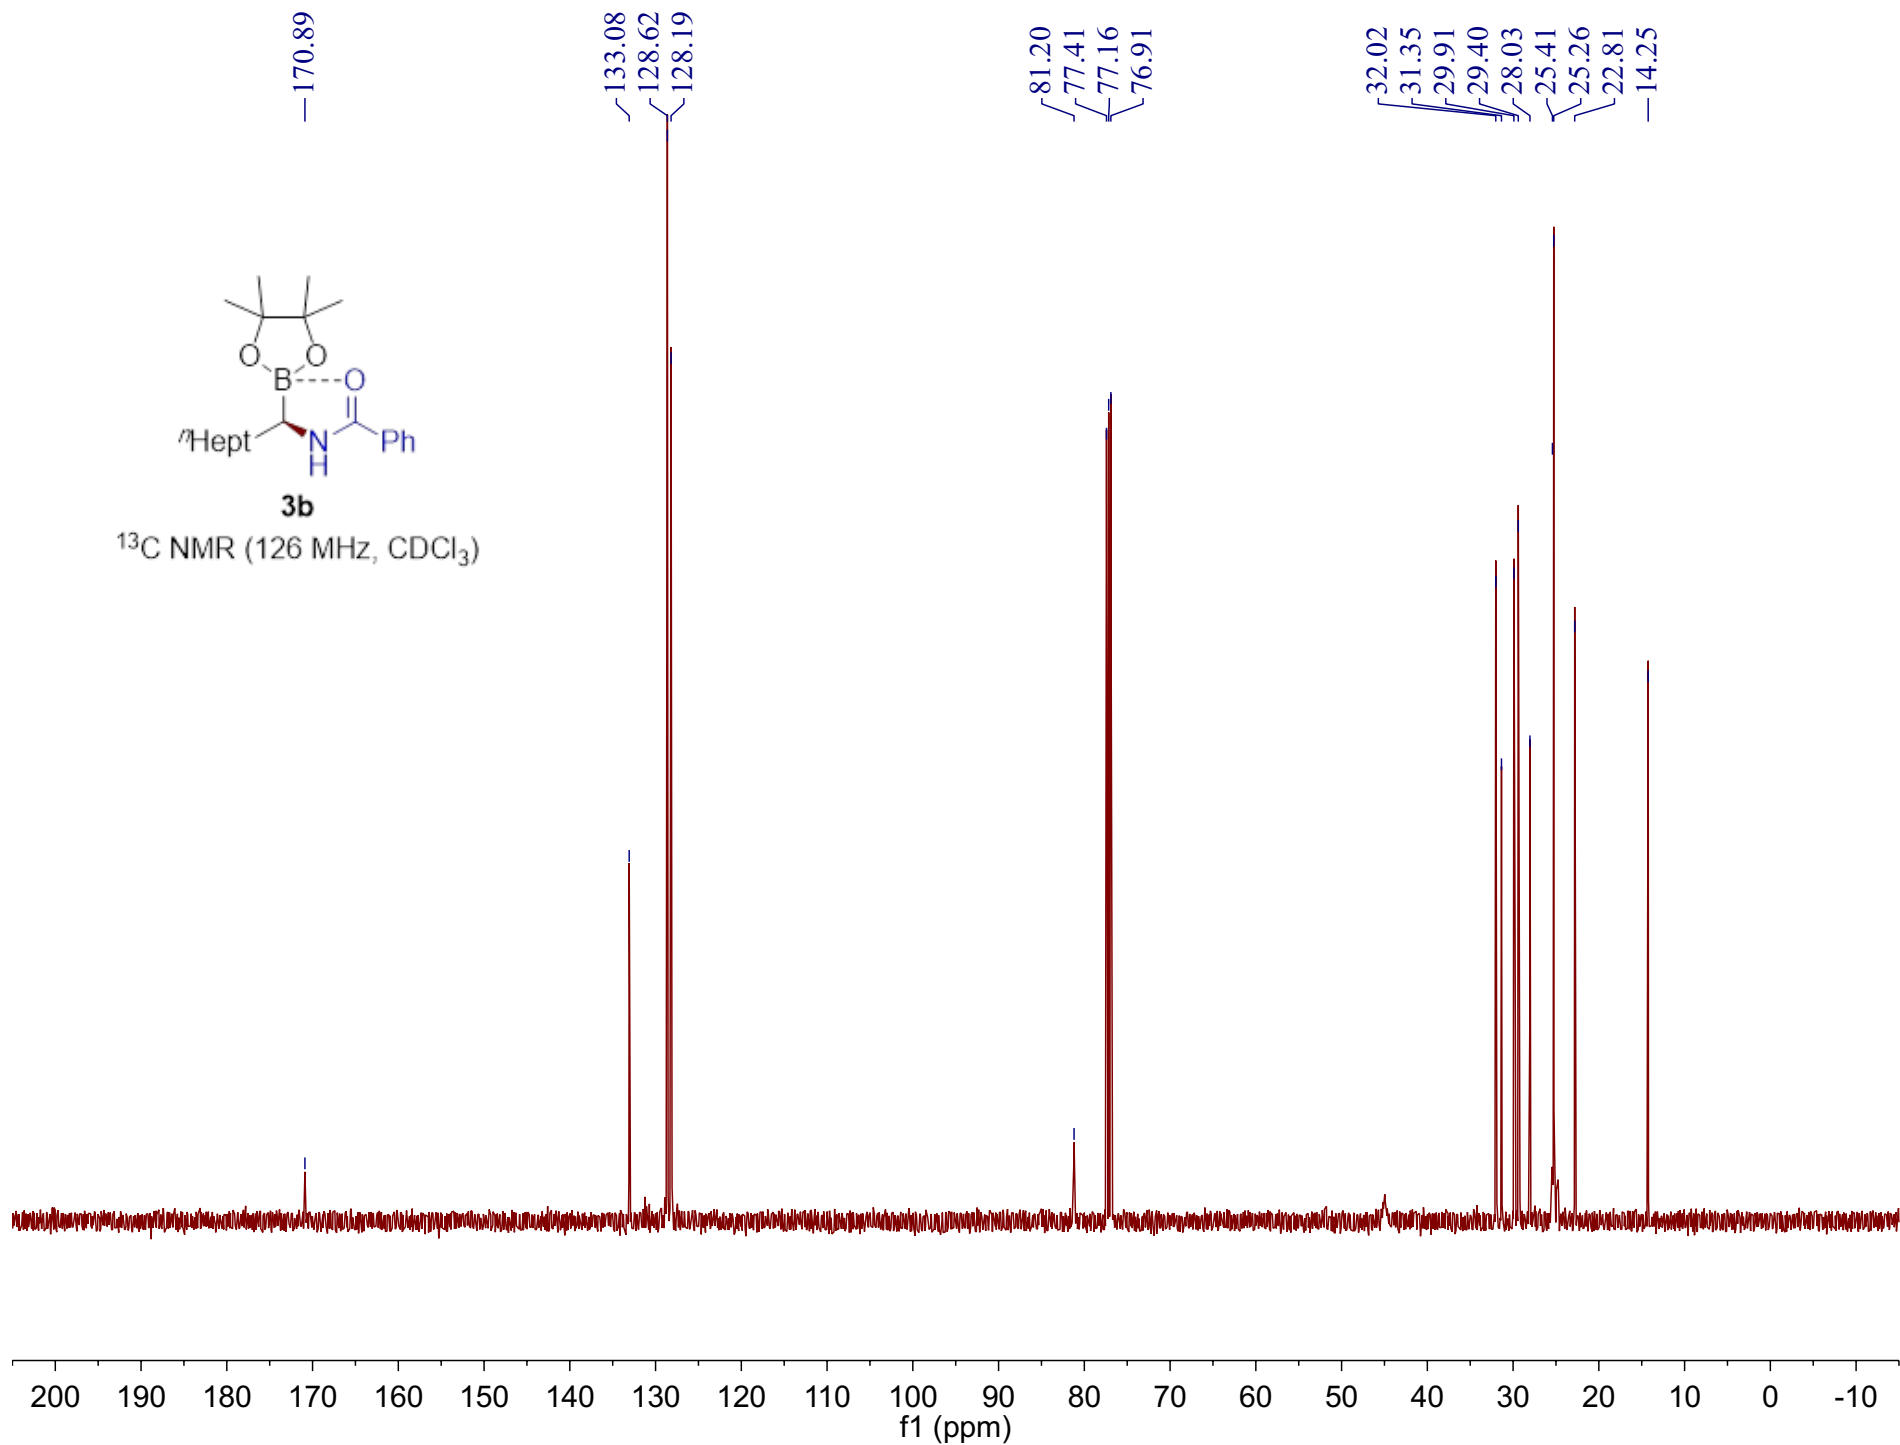

Supplementary Figure 6: <sup>13</sup>C NMR (126 MHz, CDCl<sub>3</sub>) spectrum of **3b**.

-18.27

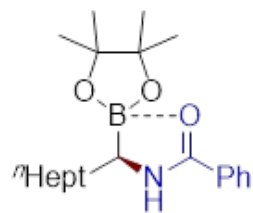

**3b**

$^{11}\text{B}$  NMR (160 MHz,  $\text{CDCl}_3$ )

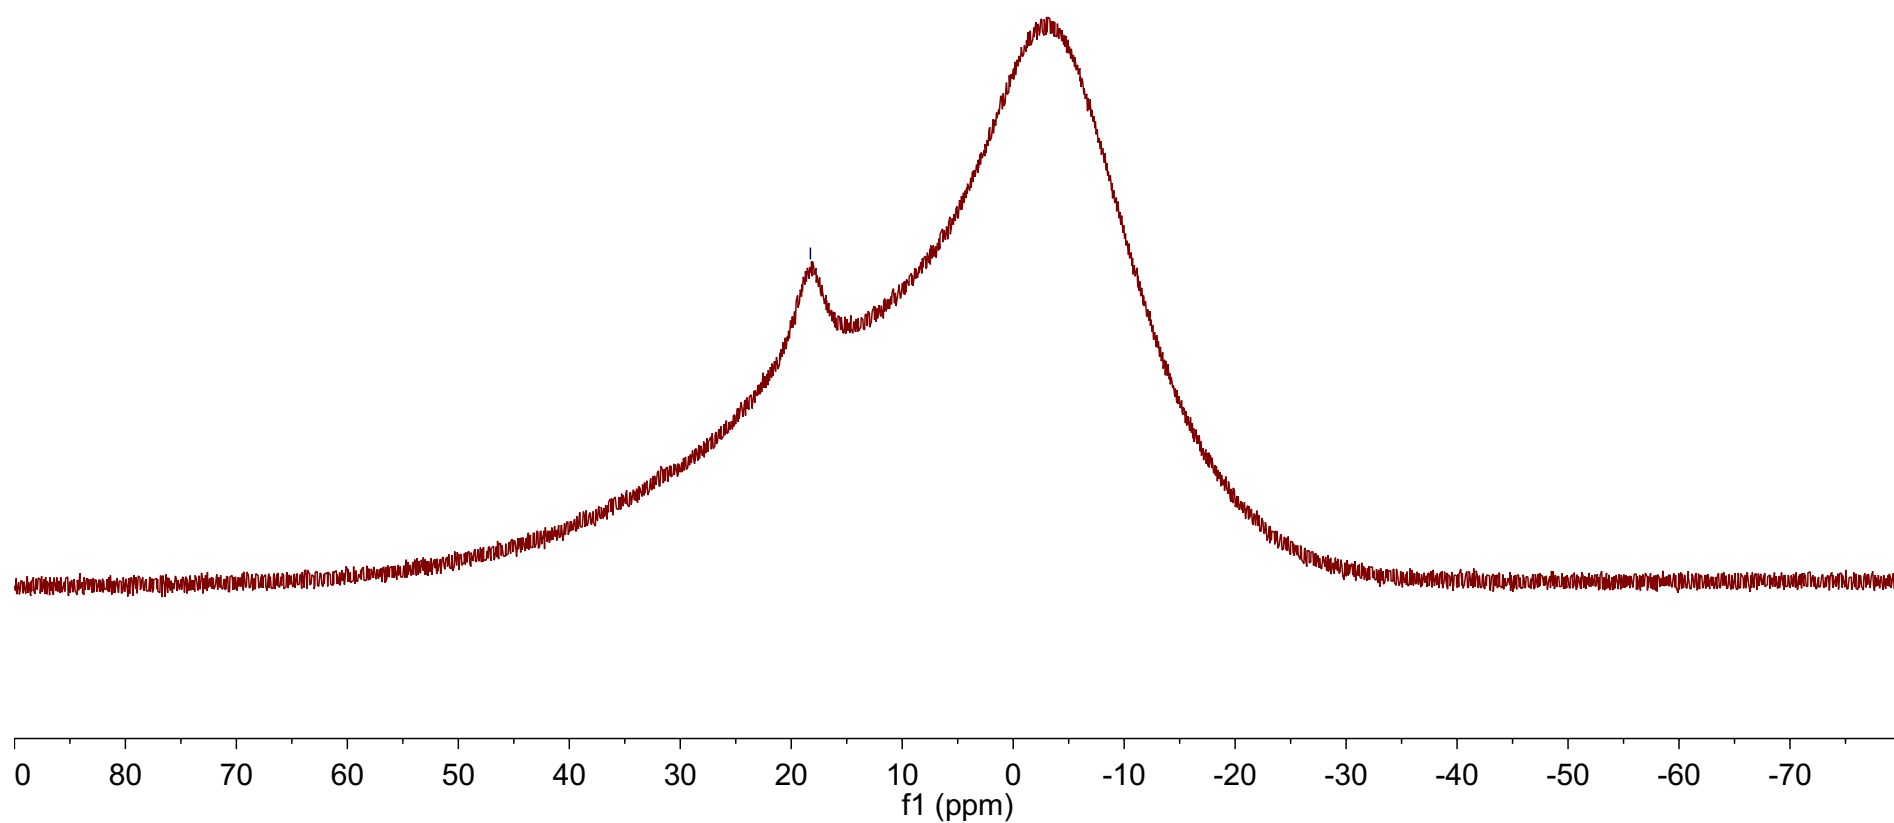

**Supplementary Figure 7:**  $^{11}\text{B}$  NMR (160 MHz,  $\text{CDCl}_3$ ) spectrum of **3b**.

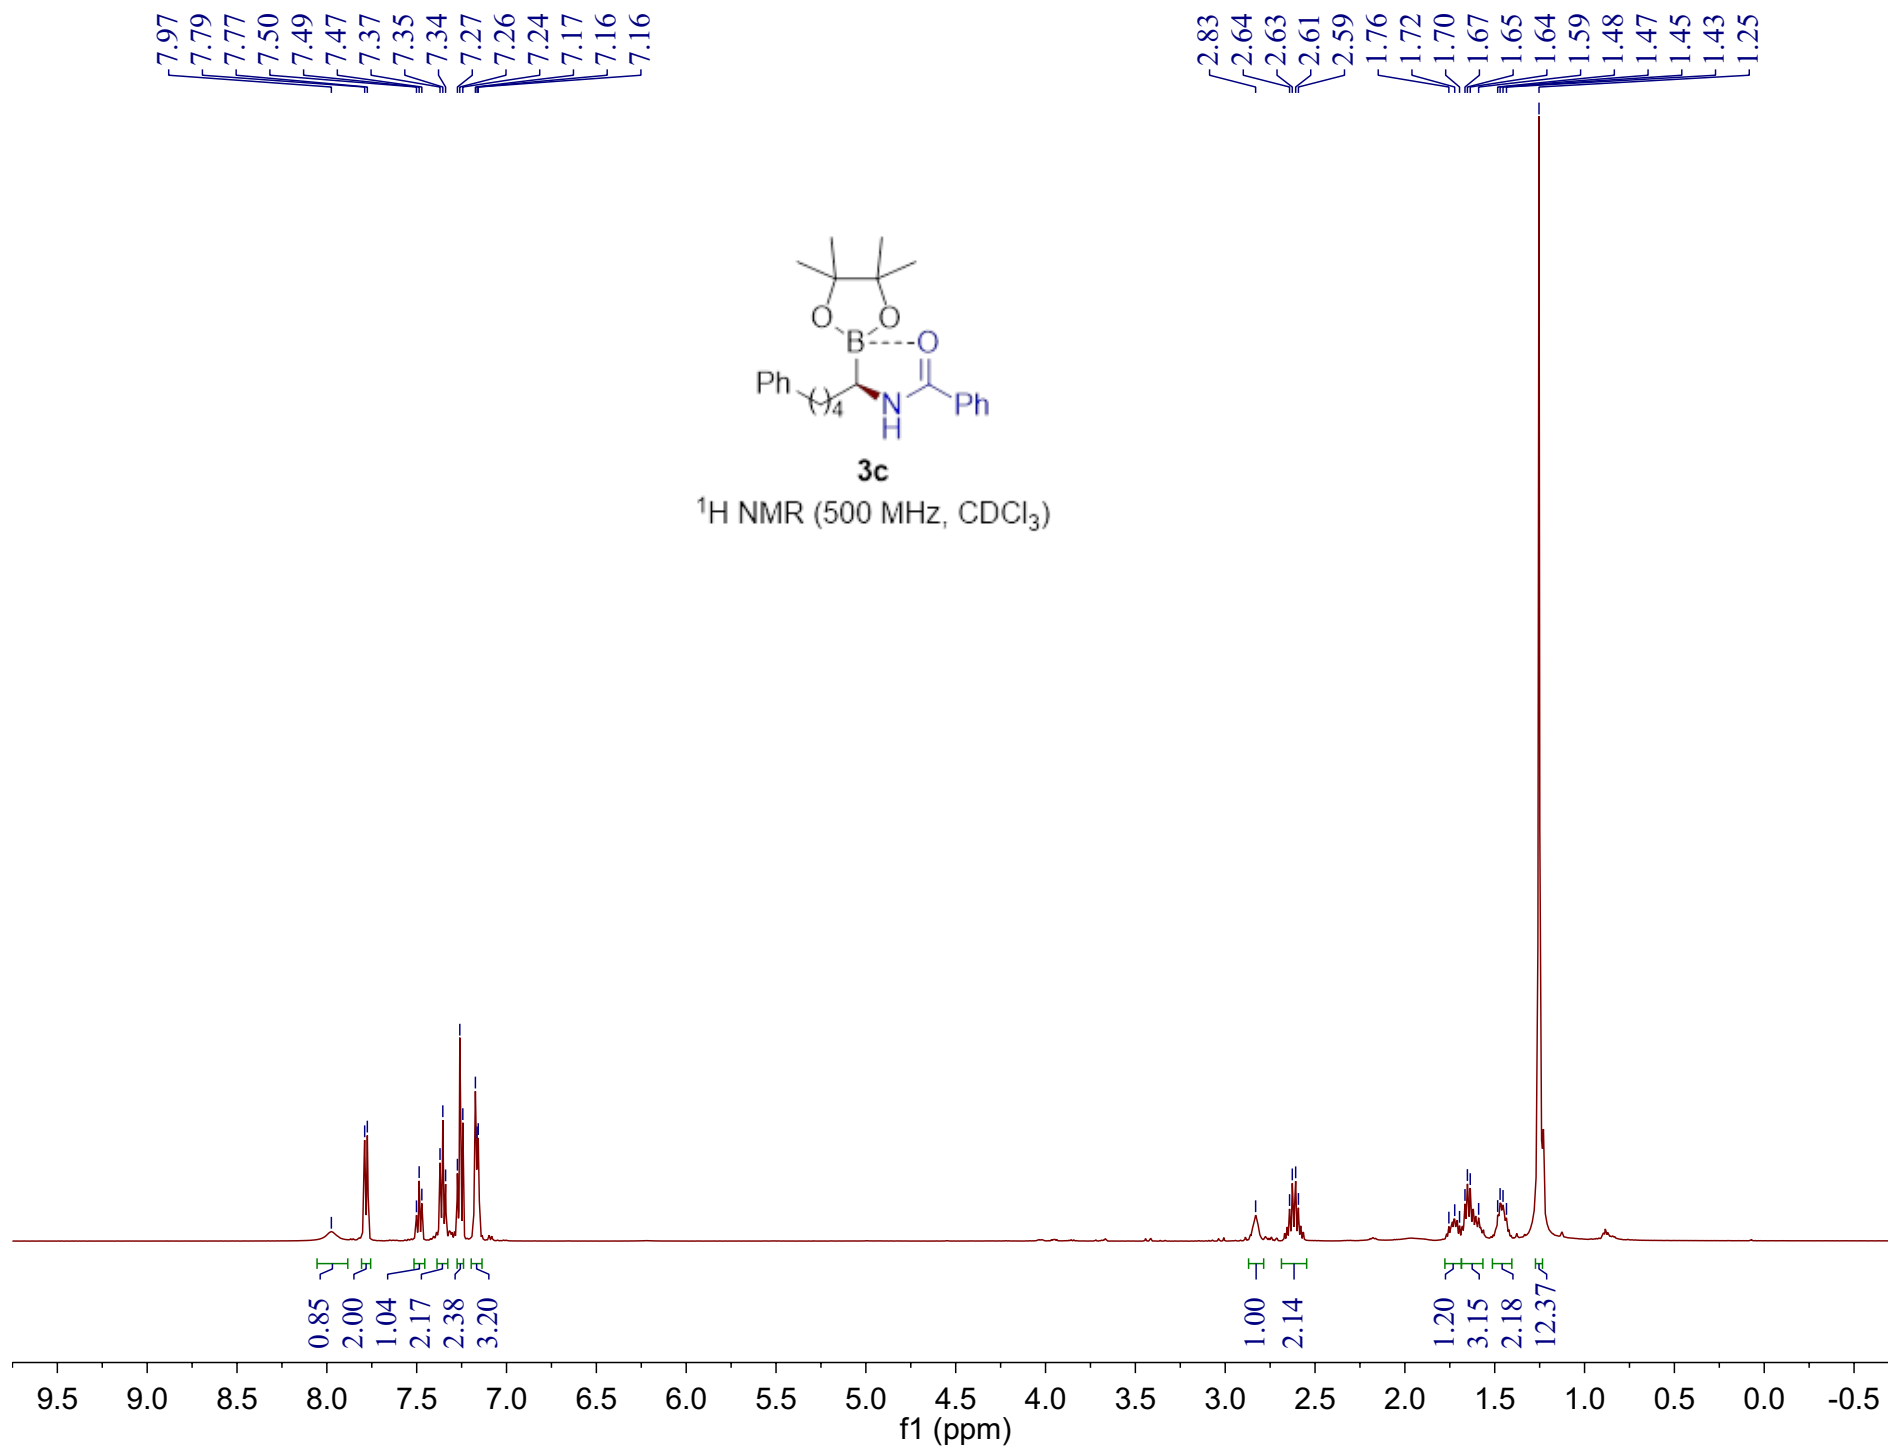

Supplementary Figure 8: <sup>1</sup>H NMR (500 MHz, CDCl<sub>3</sub>) spectrum of **3c**.



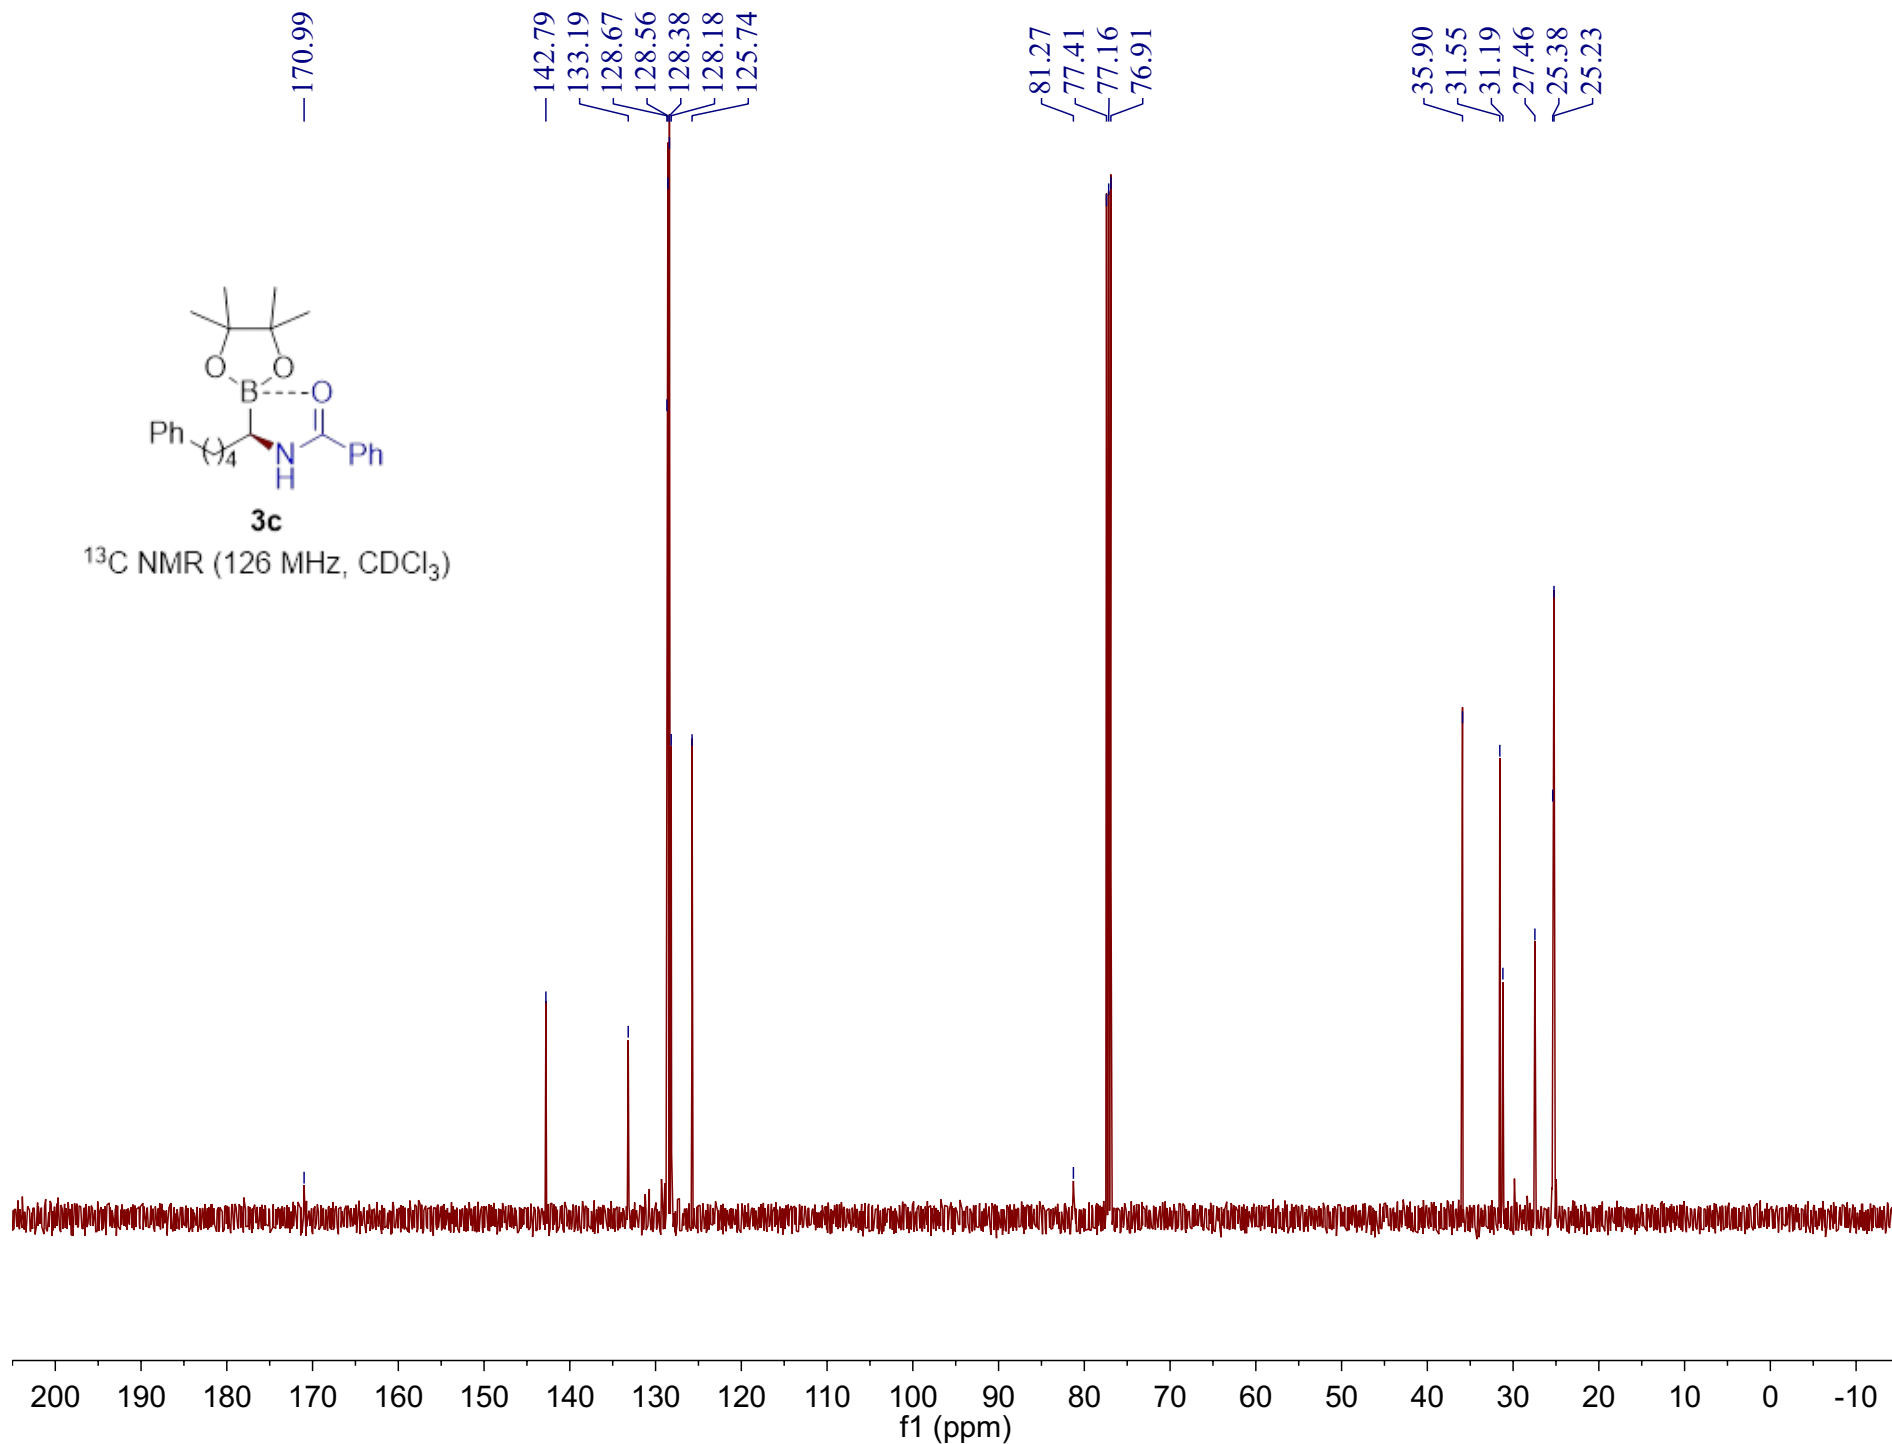

Supplementary Figure 9:  $^{13}\text{C}$  NMR (126 MHz,  $\text{CDCl}_3$ ) spectrum of **3c**.

-18.23

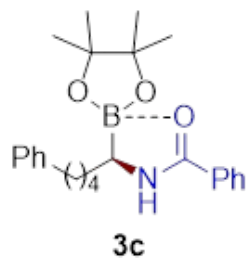

**3c**  
 $^{11}\text{B}$  NMR (160 MHz,  $\text{CDCl}_3$ )

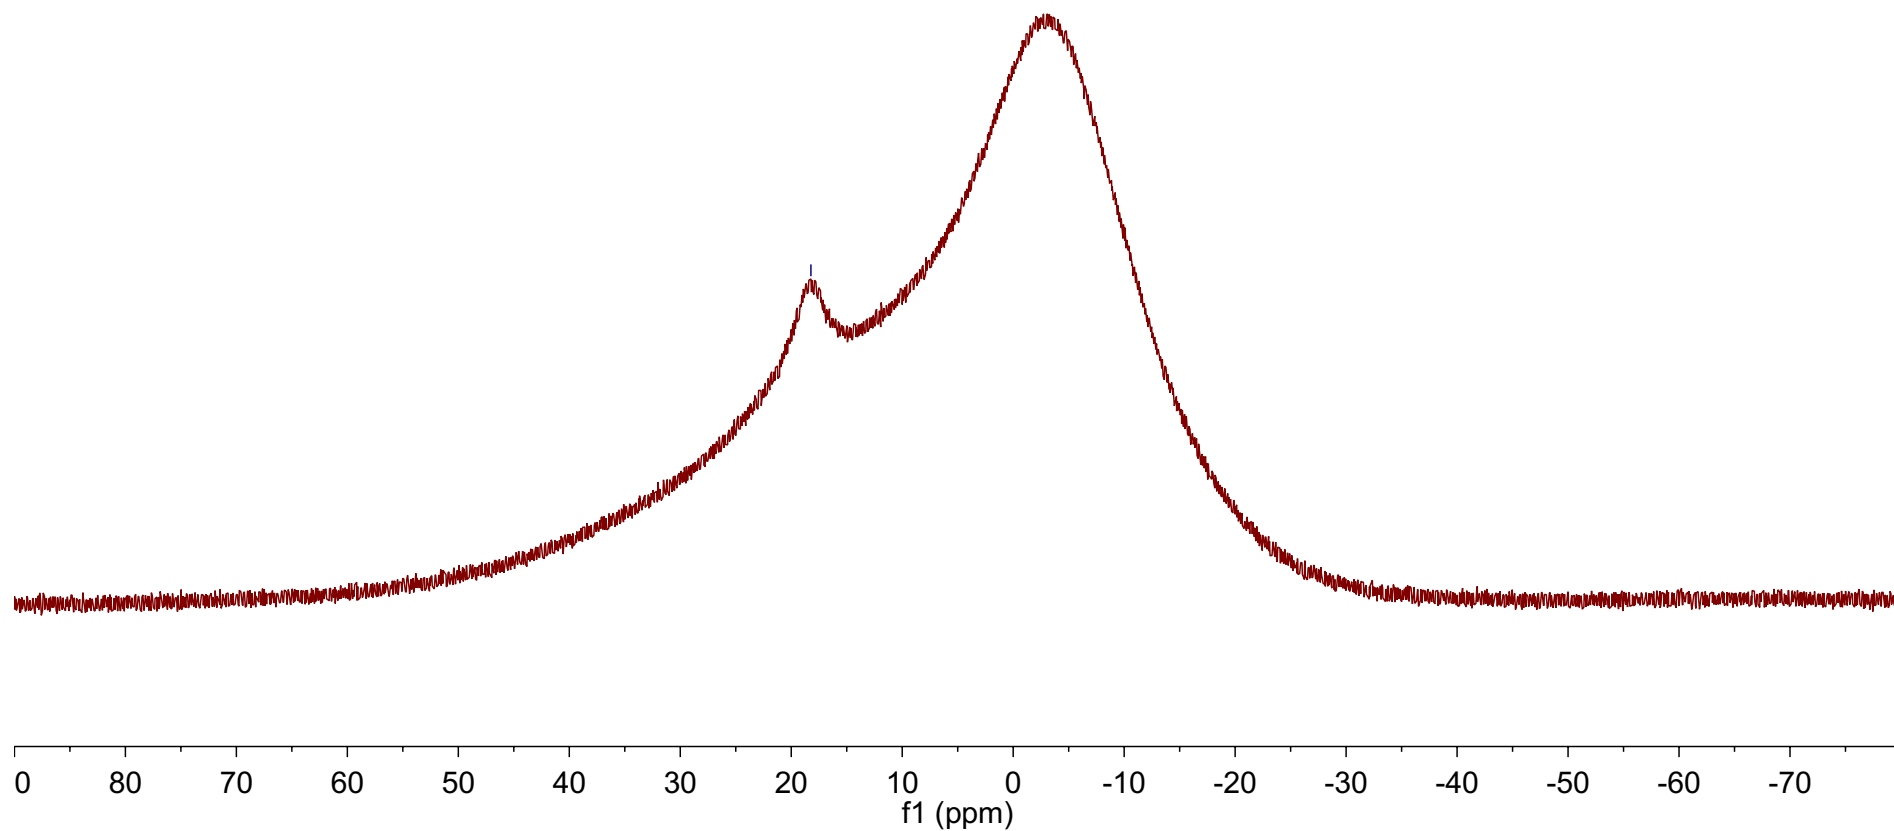

**Supplementary Figure 10:**  $^{11}\text{B}$  NMR (160 MHz,  $\text{CDCl}_3$ ) spectrum of **3c**.

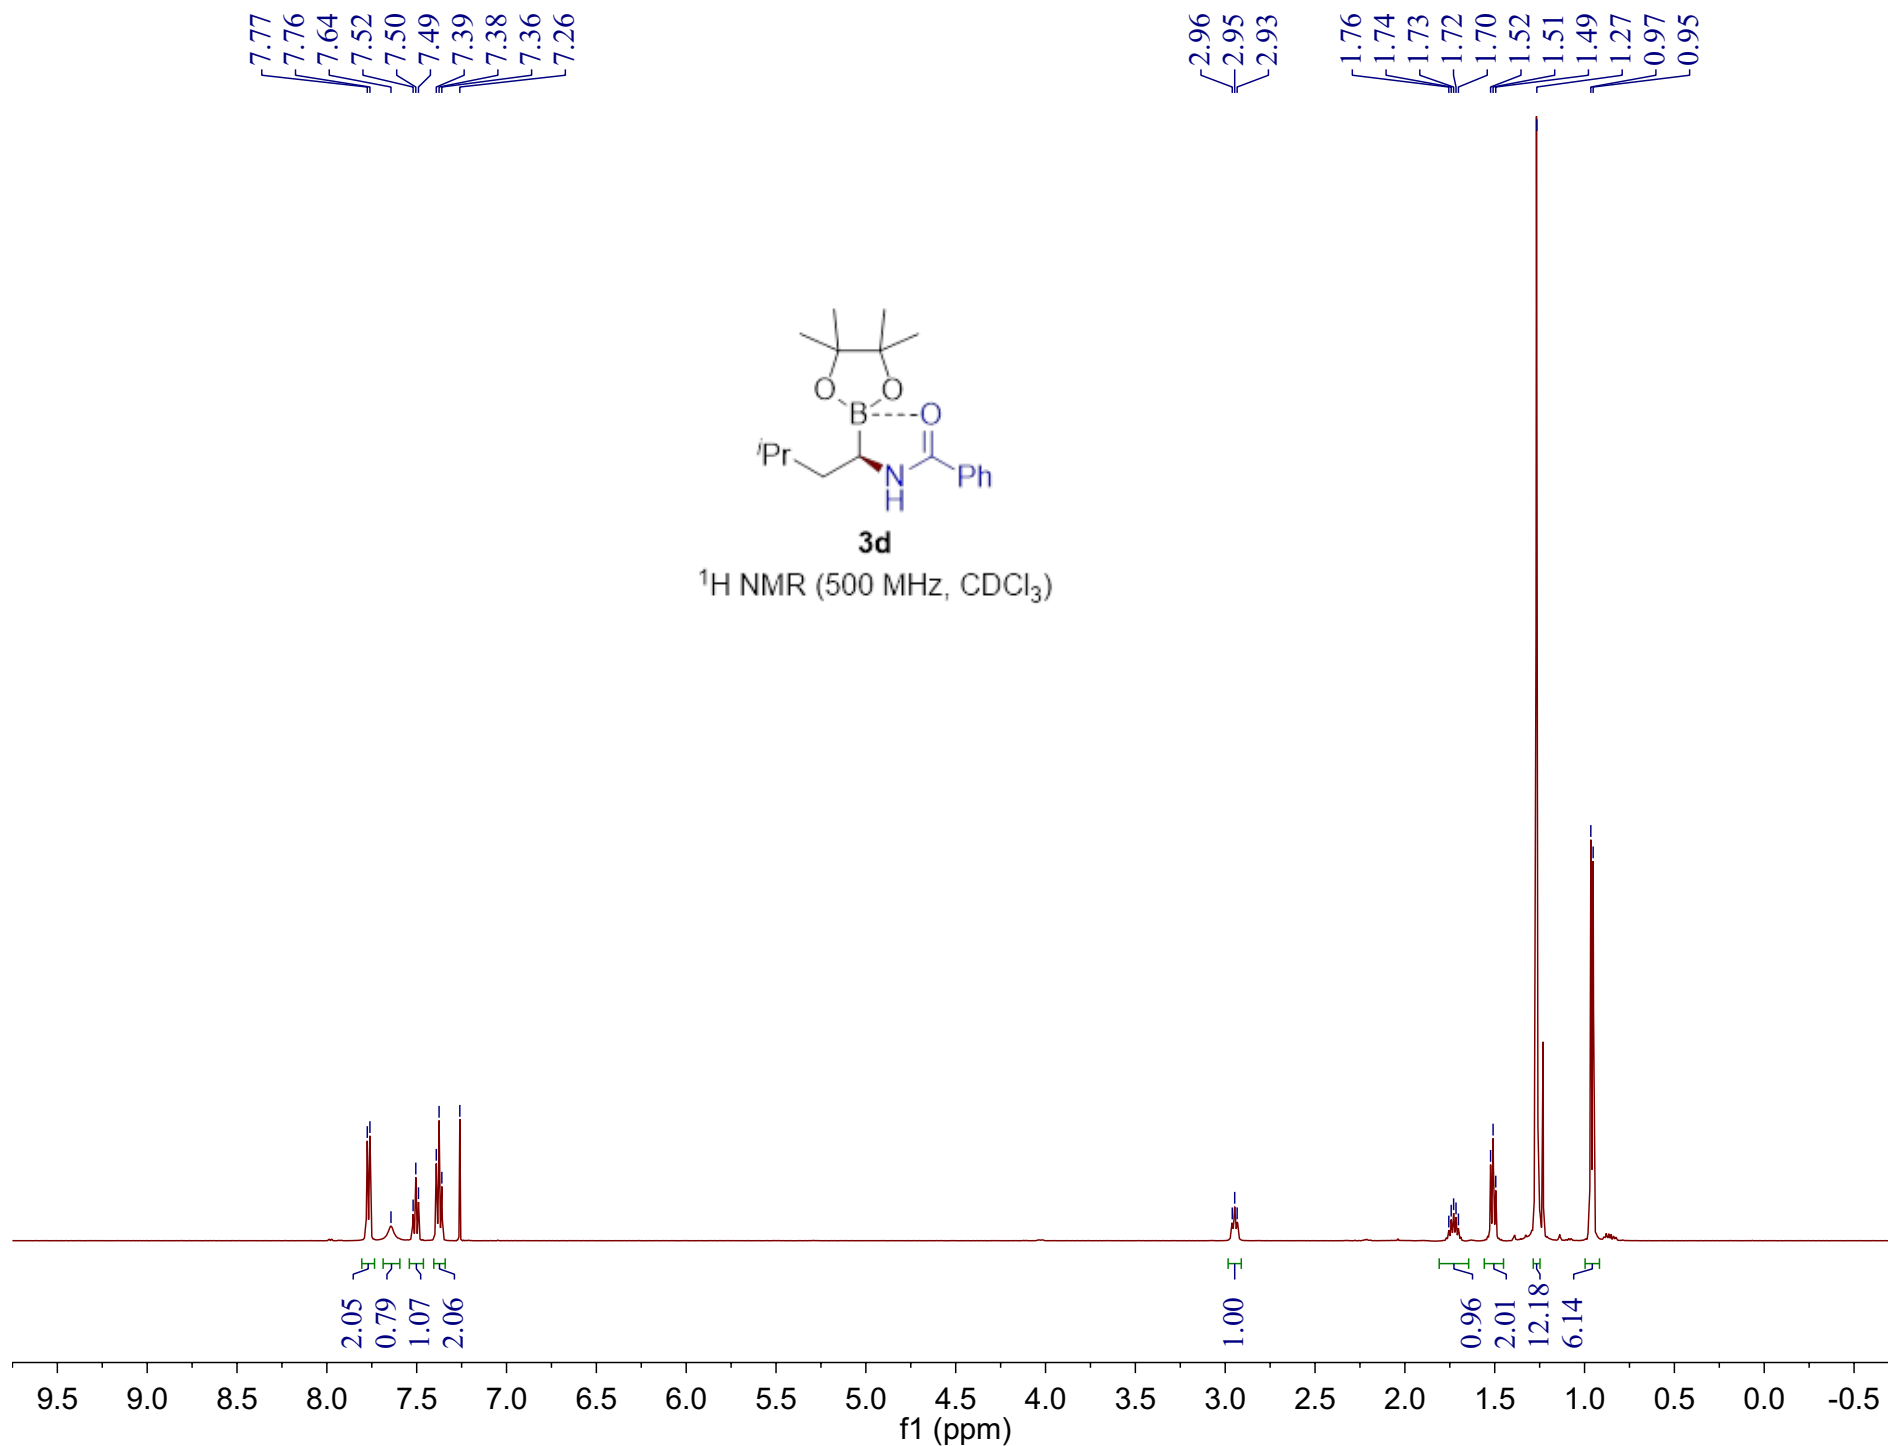

Supplementary Figure 11: <sup>1</sup>H NMR (500 MHz, CDCl<sub>3</sub>) spectrum of **3d**.

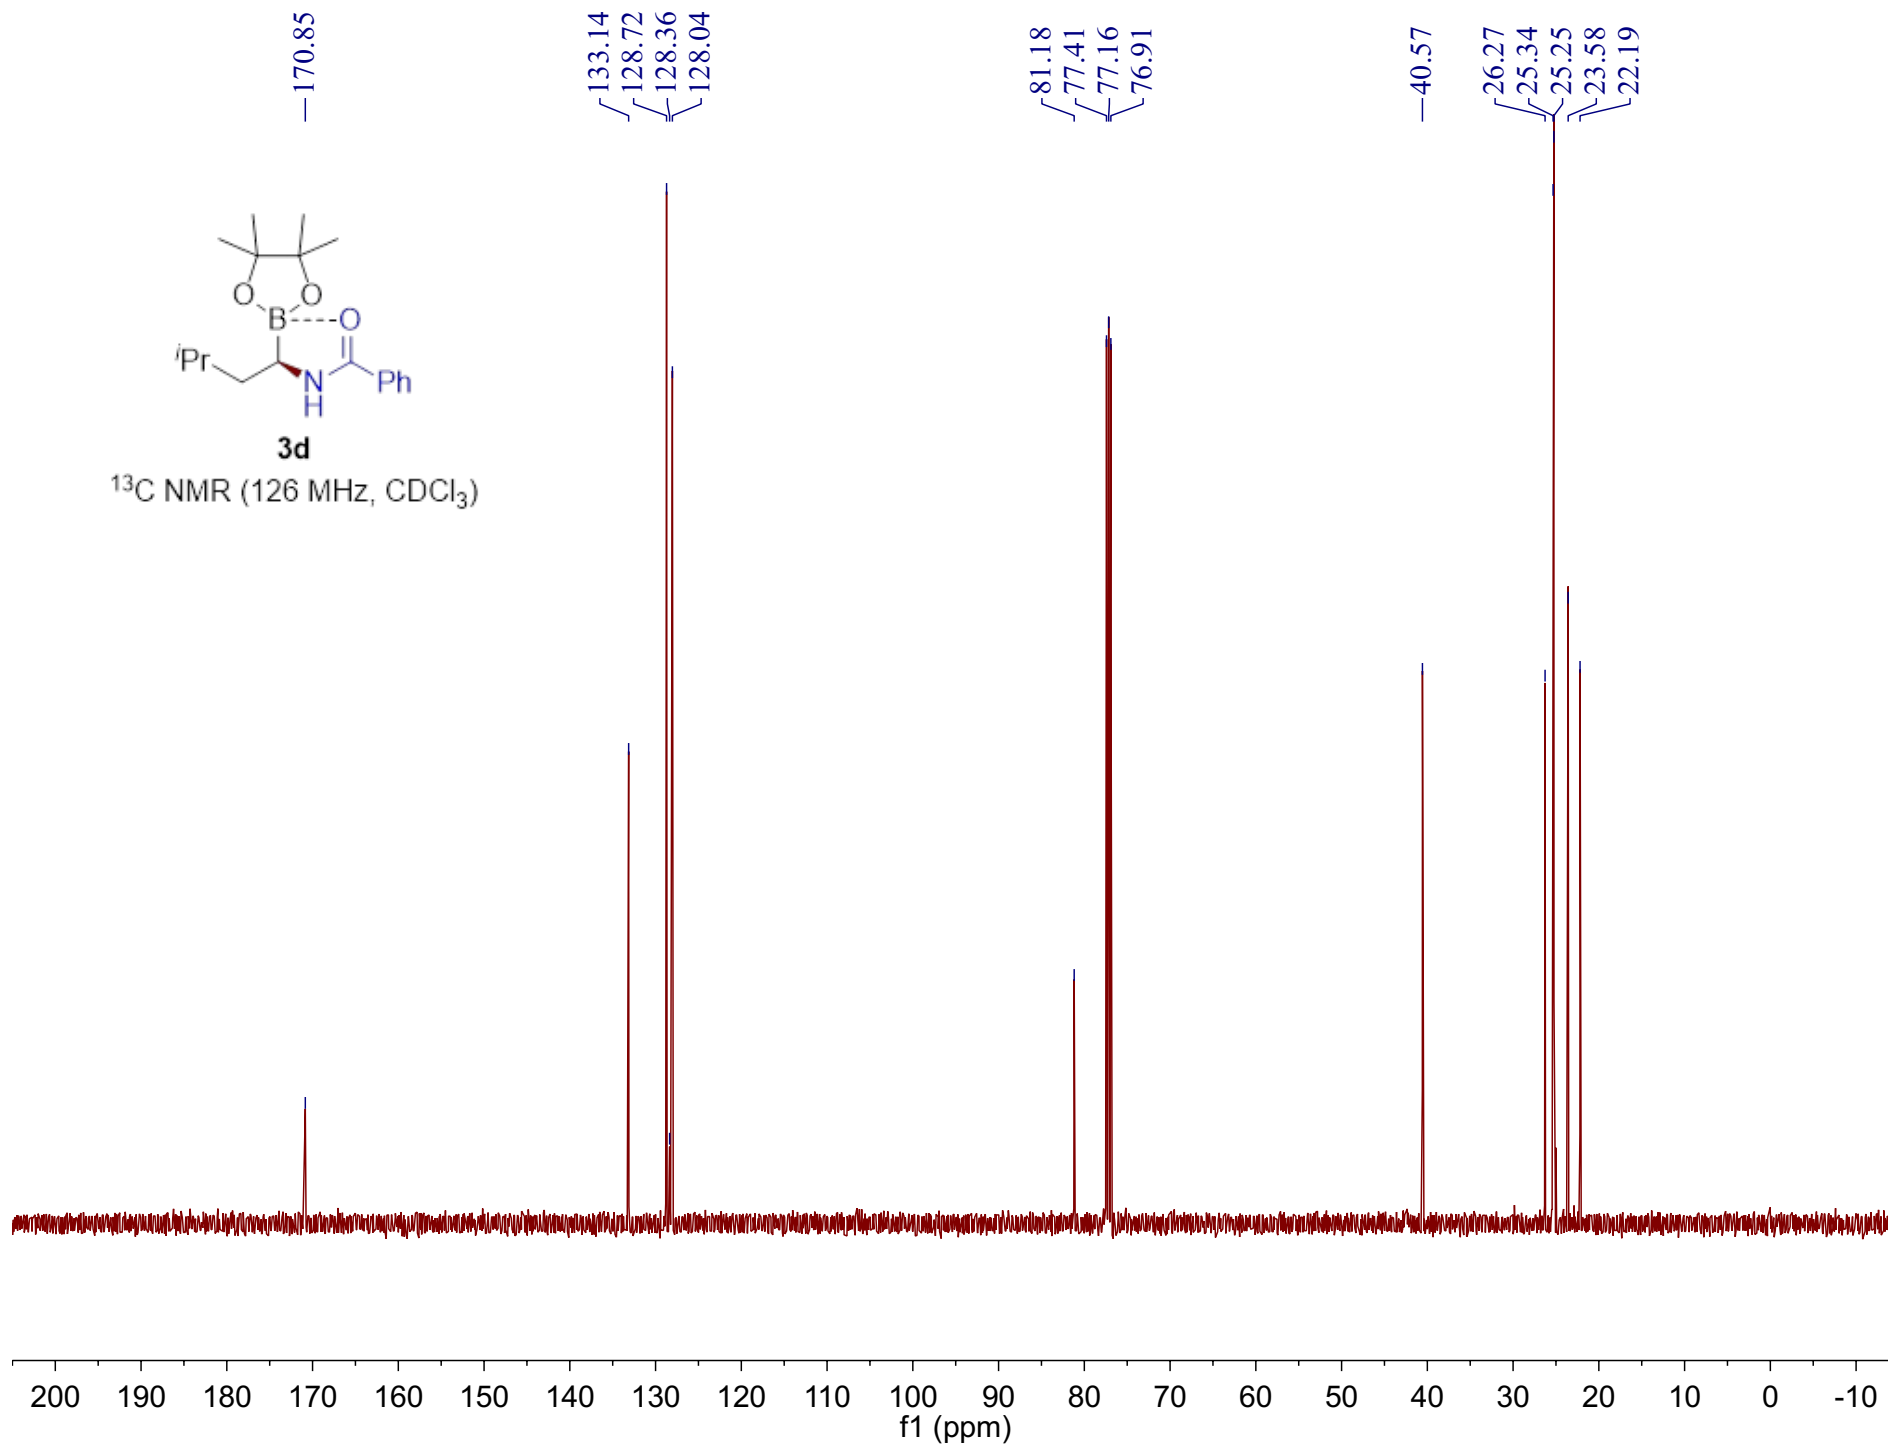

**Supplementary Figure 12:**  $^{13}\text{C}$  NMR (126 MHz,  $\text{CDCl}_3$ ) spectrum of **3d**.

-18.64

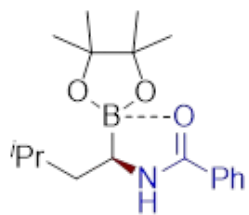

**3d**

$^{11}\text{B}$  NMR (160 MHz,  $\text{CDCl}_3$ )

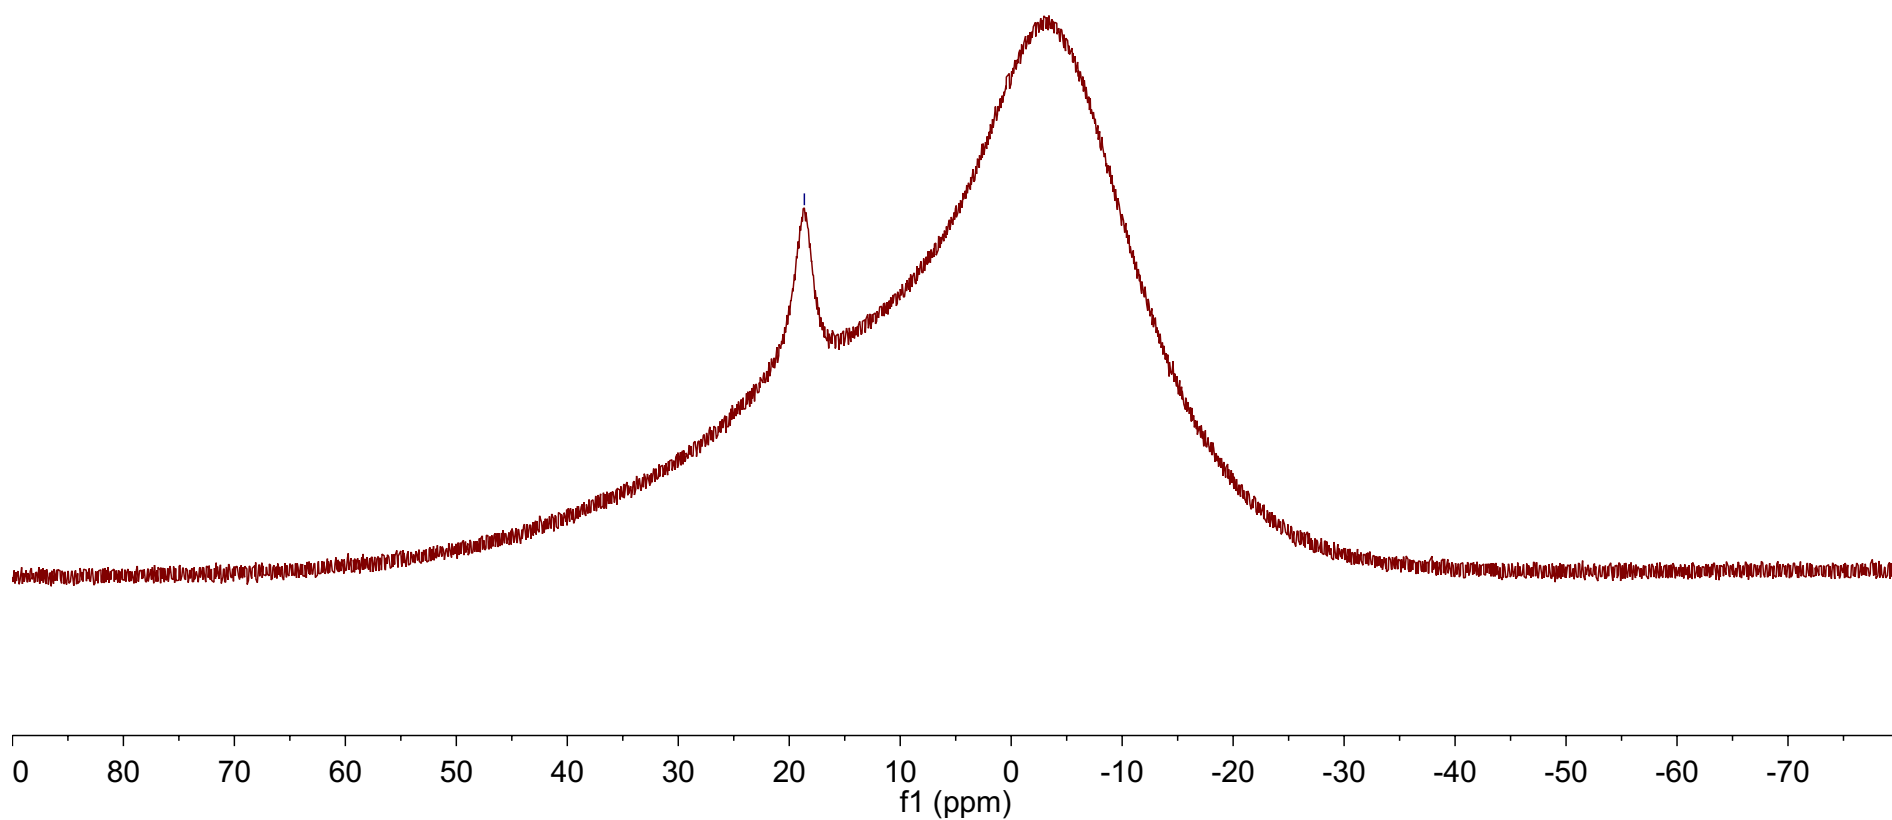

**Supplementary Figure 13:**  $^{11}\text{B}$  NMR (160 MHz,  $\text{CDCl}_3$ ) spectrum of **3d**.

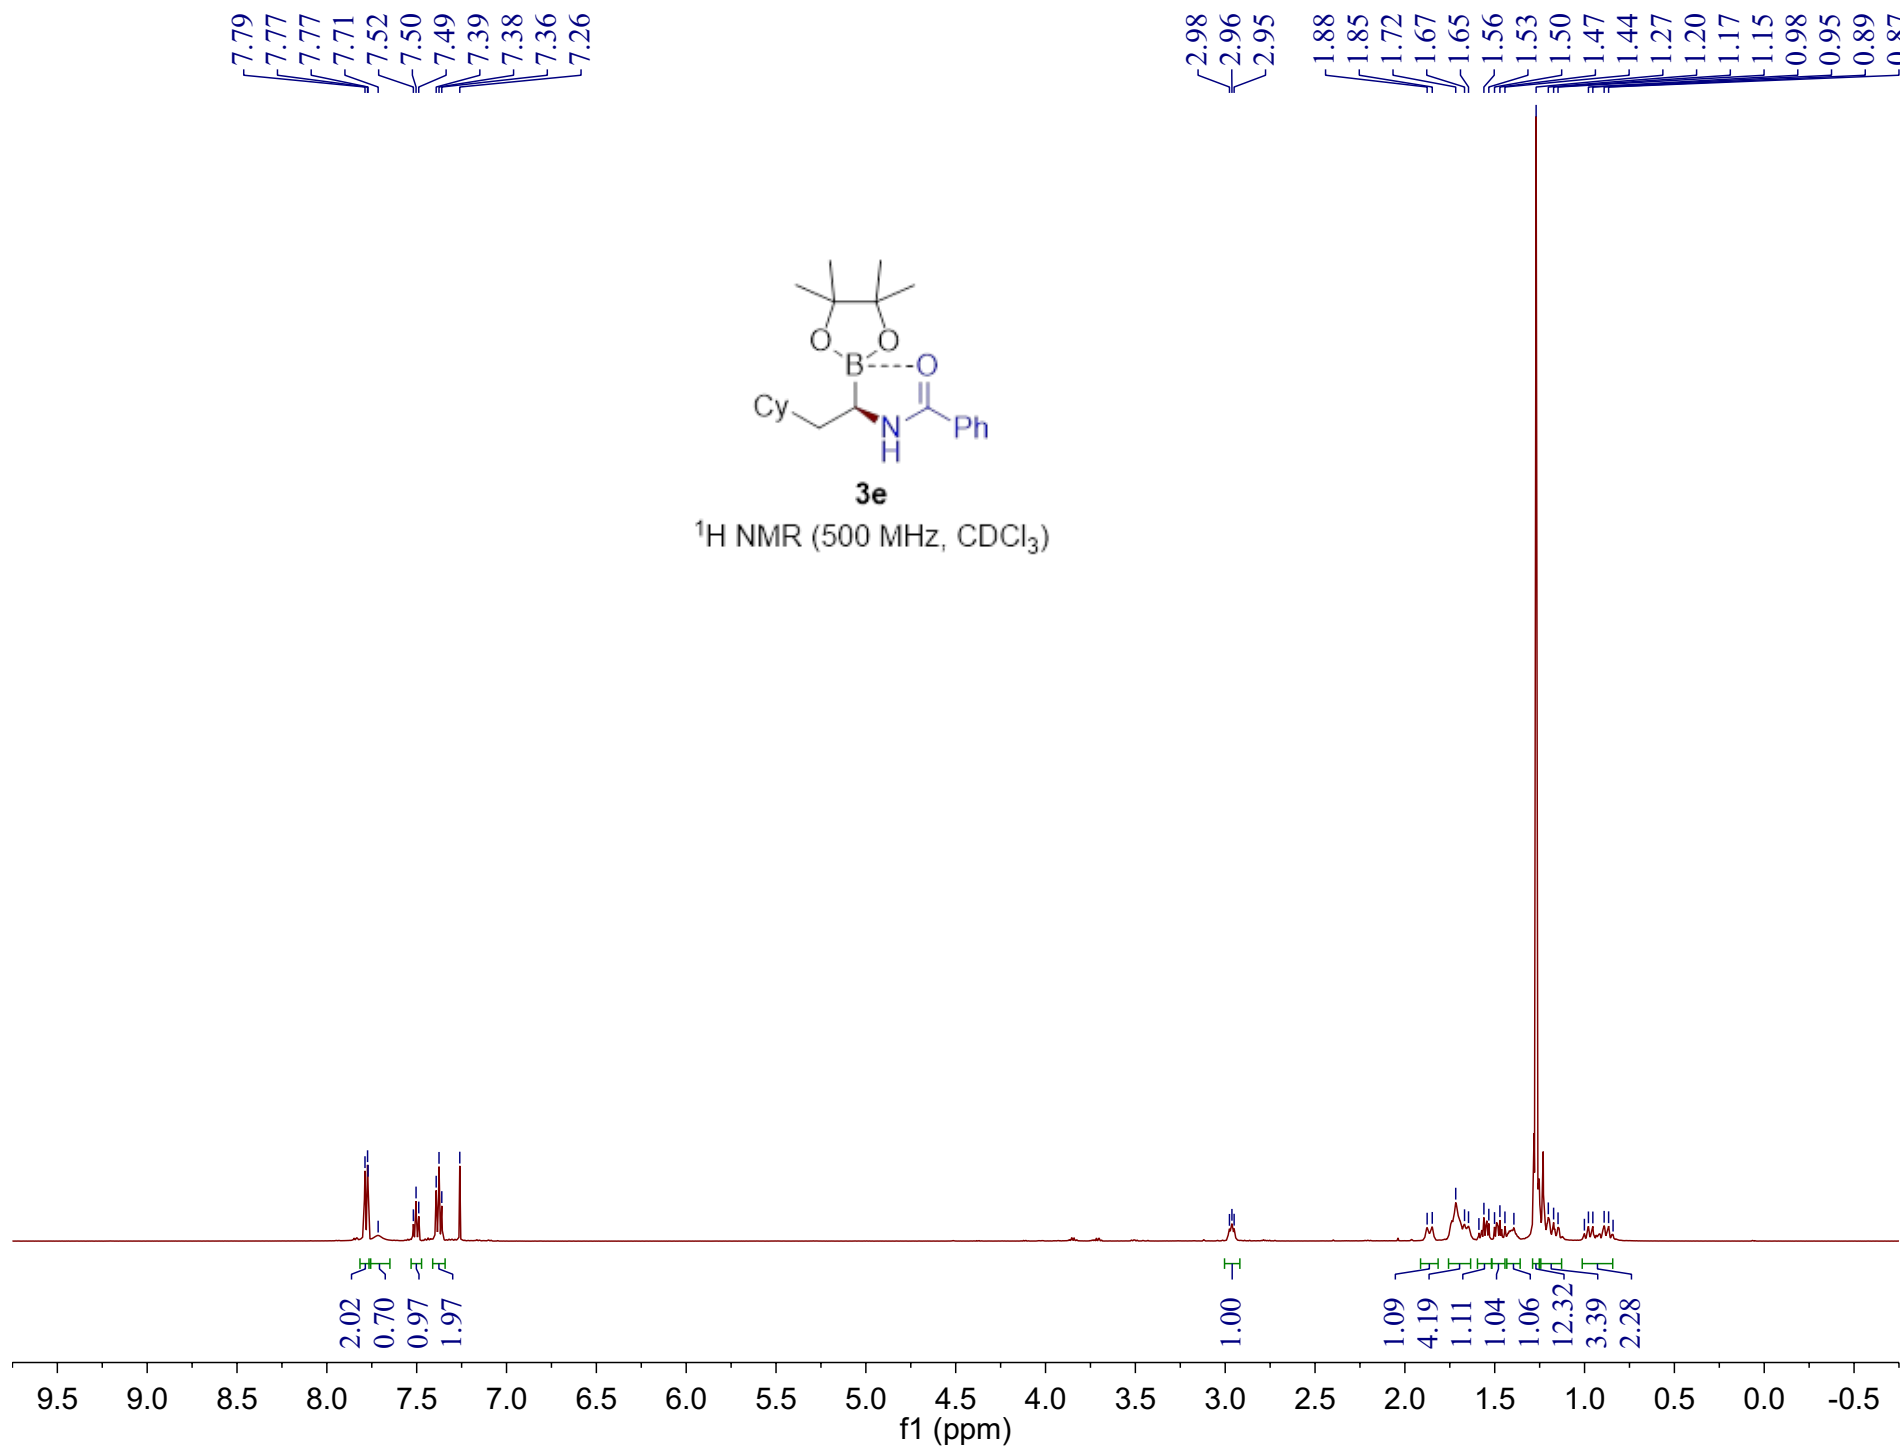

Supplementary Figure 14: <sup>1</sup>H NMR (500 MHz, CDCl<sub>3</sub>) spectrum of **3e**.

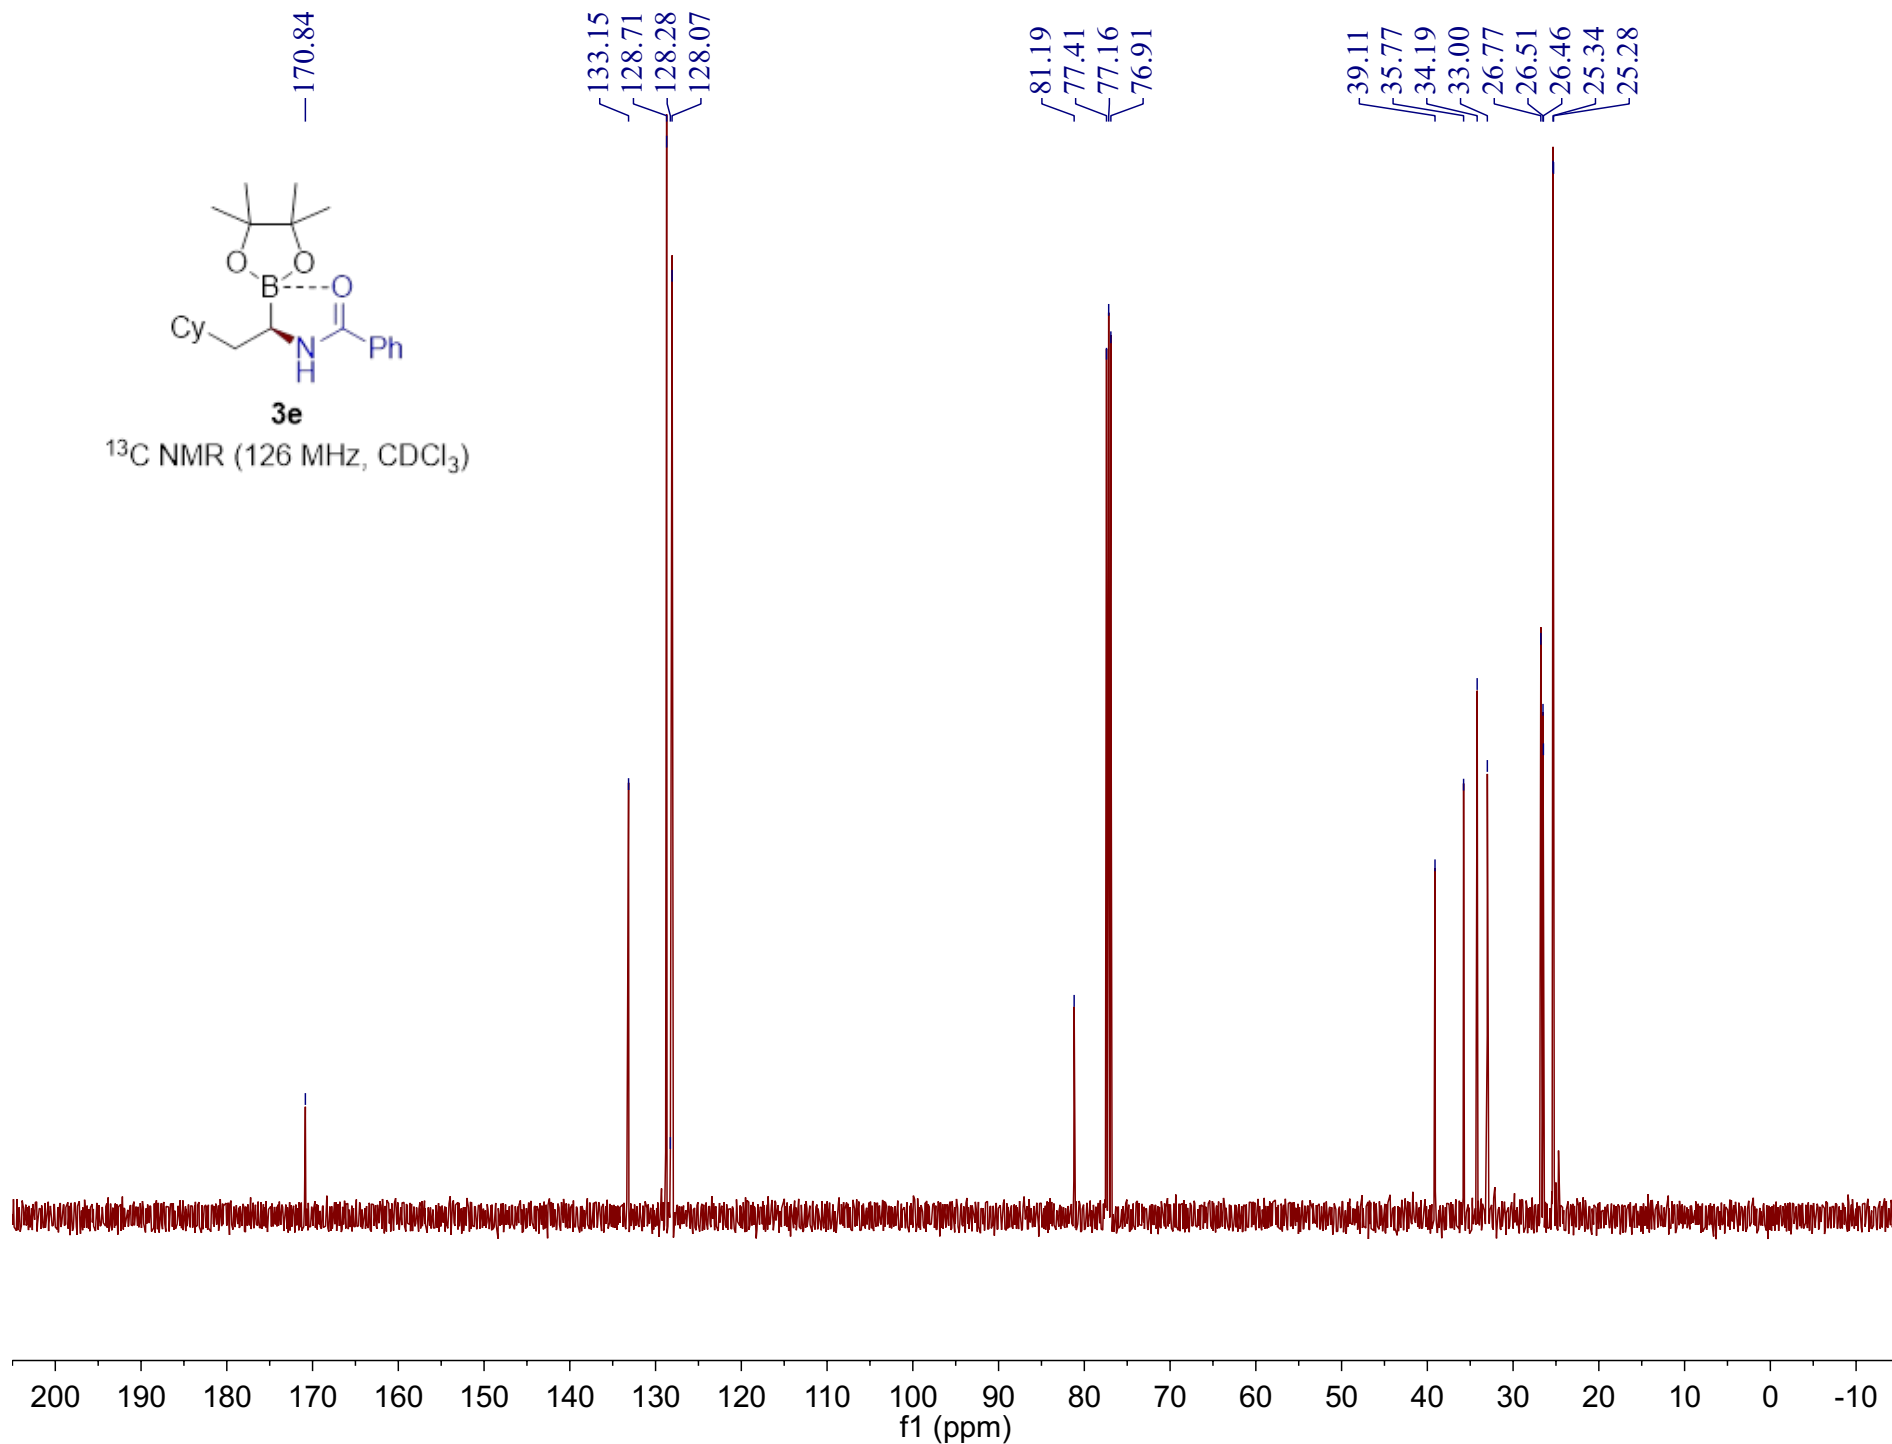

Supplementary Figure 15: <sup>13</sup>C NMR (126 MHz, CDCl<sub>3</sub>) spectrum of **3e**.

-18.60

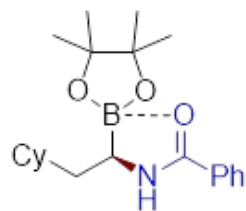

**3e**

$^{11}\text{B}$  NMR (160 MHz,  $\text{CDCl}_3$ )

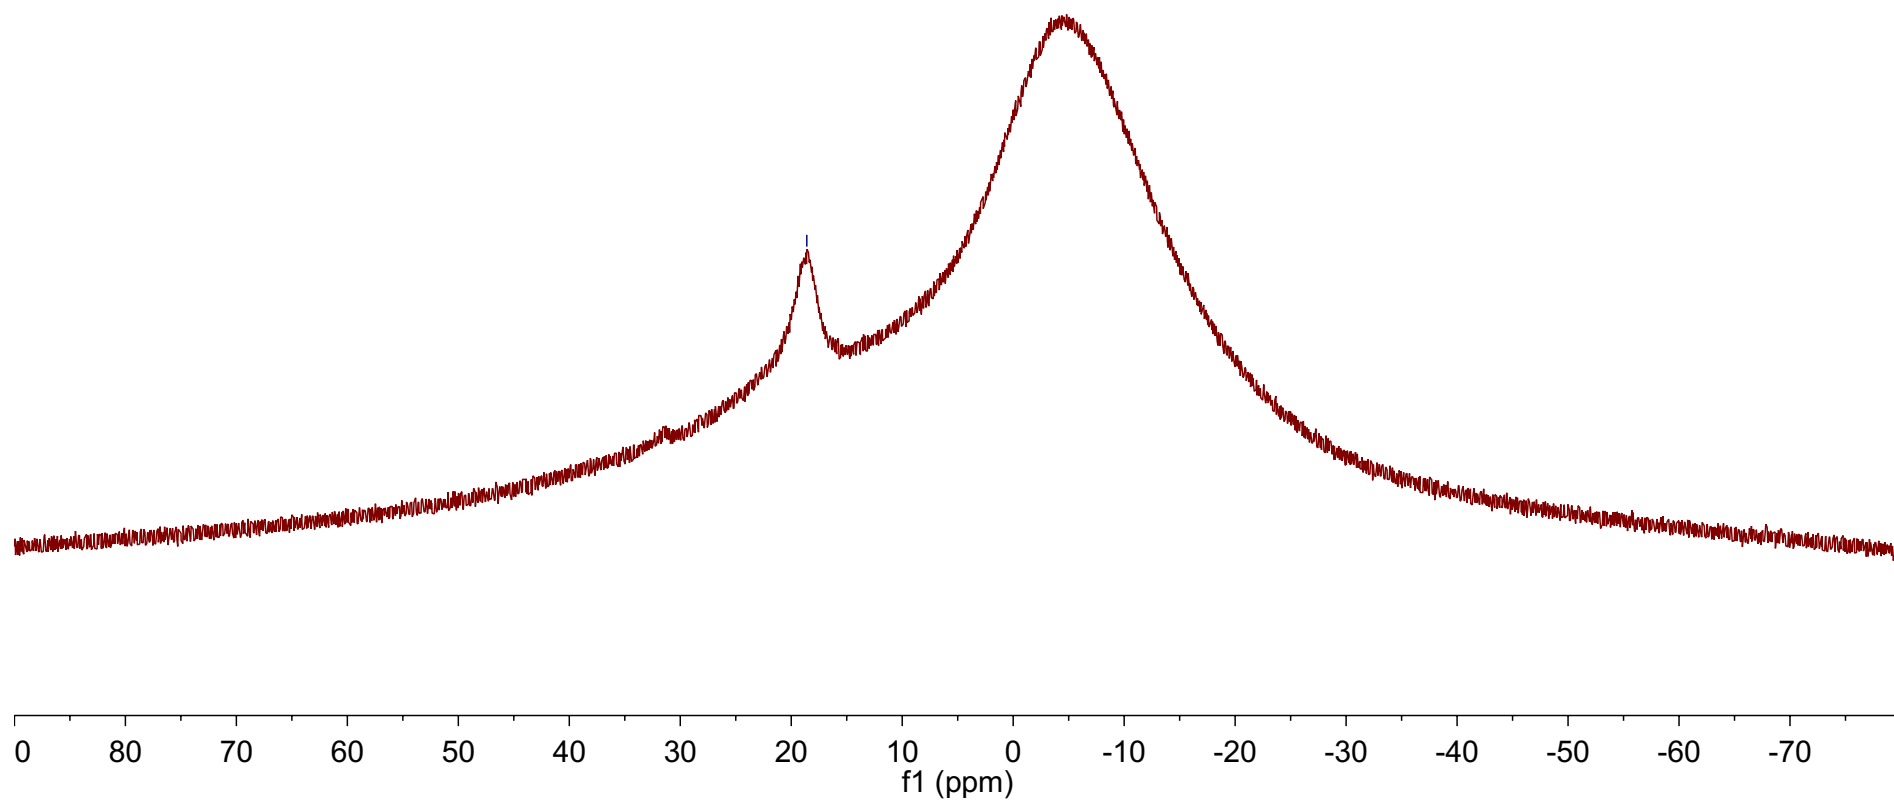

**Supplementary Figure 16:**  $^{11}\text{B}$  NMR (160 MHz,  $\text{CDCl}_3$ ) spectrum of **3e**.



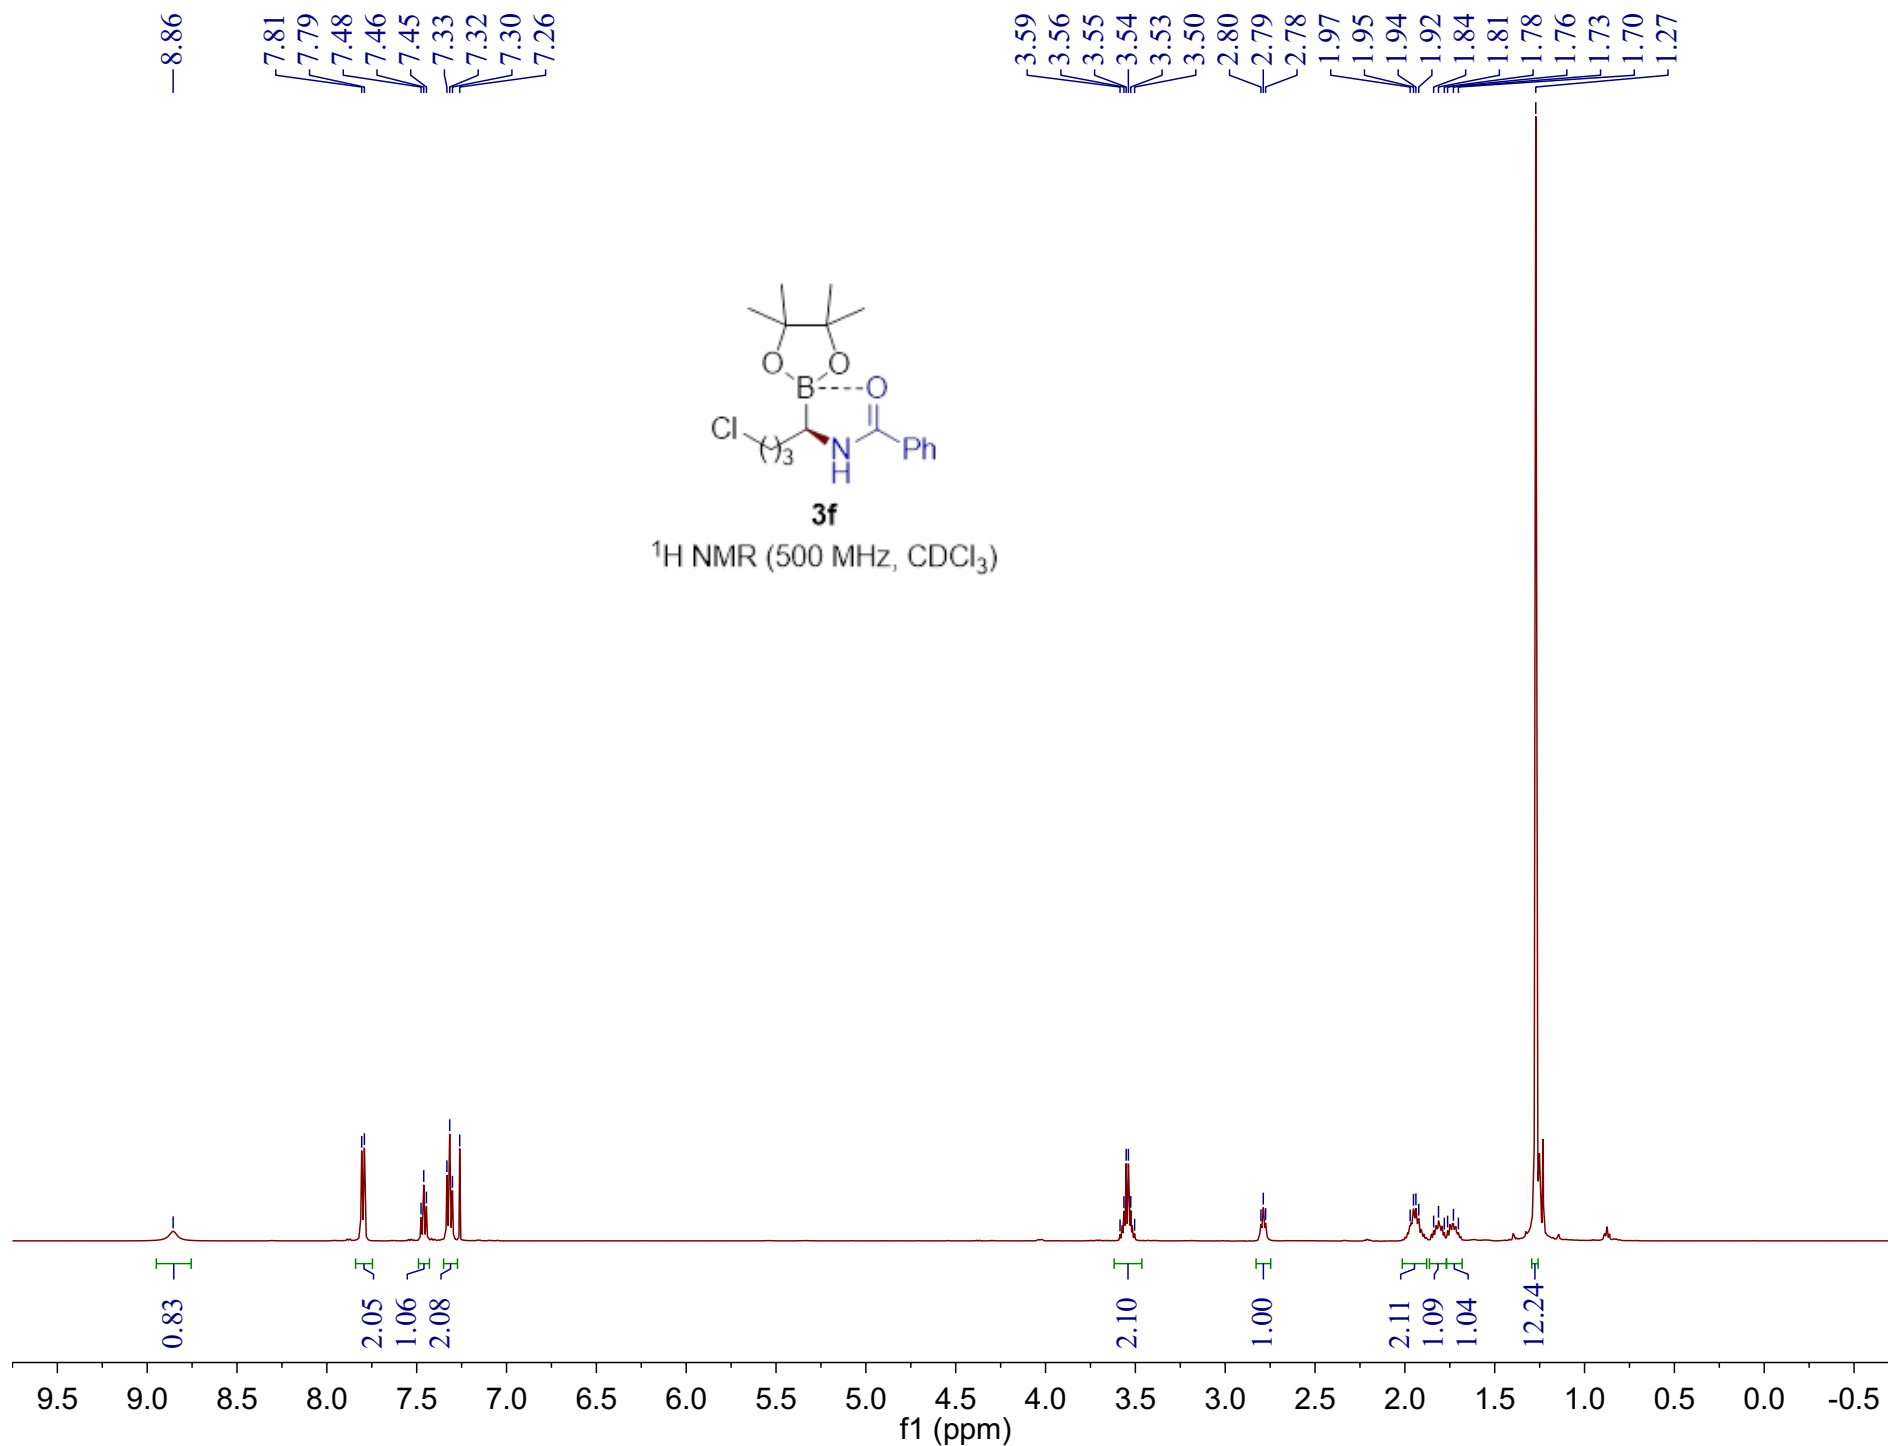

Supplementary Figure 17: <sup>1</sup>H NMR (500 MHz, CDCl<sub>3</sub>) spectrum of **3f**.

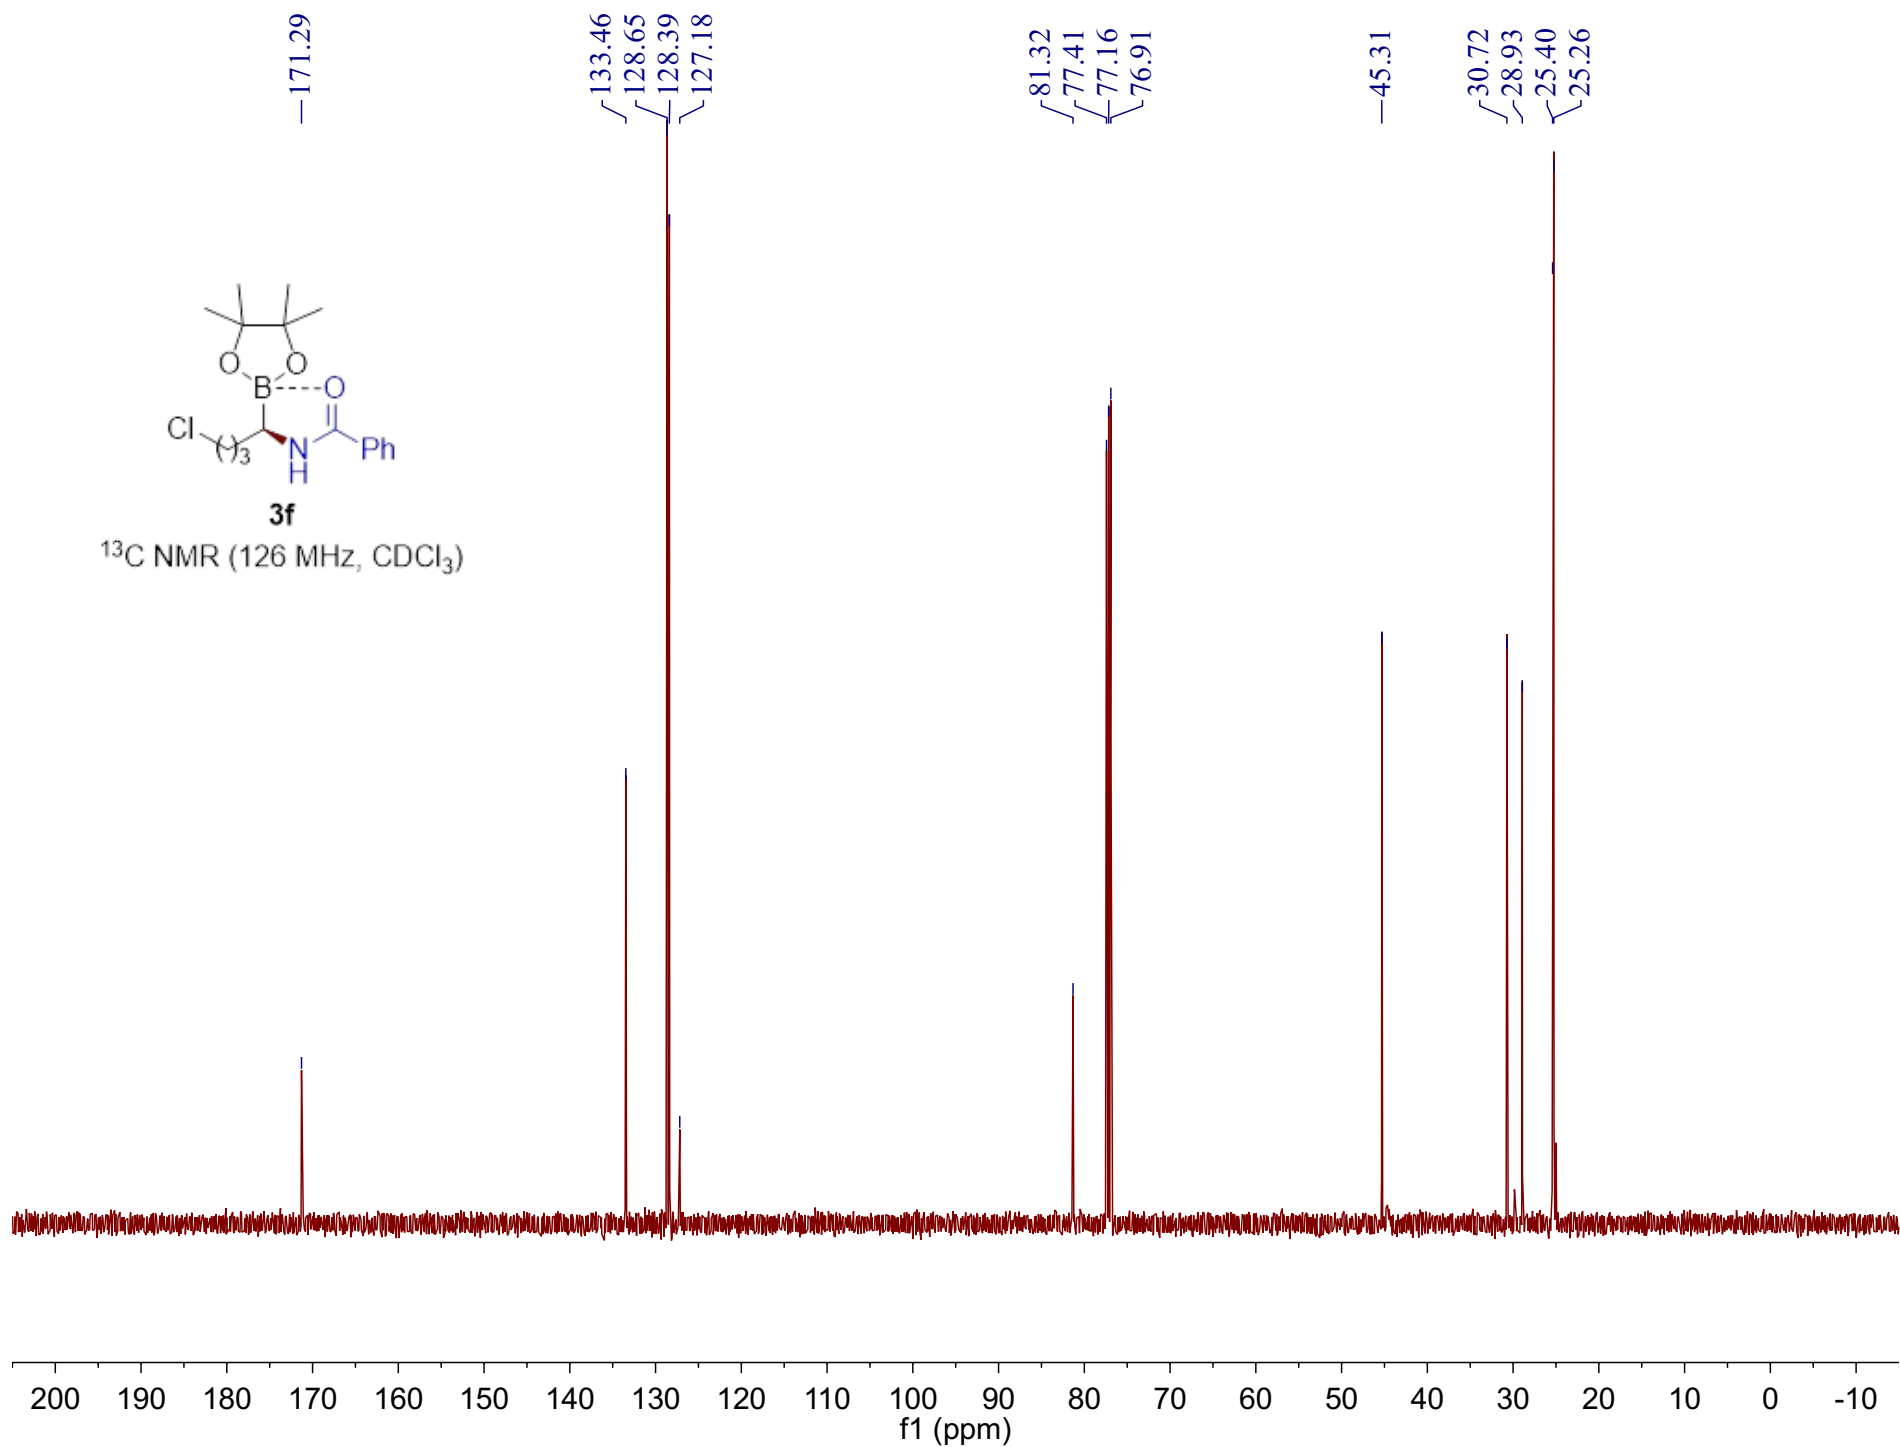

**Supplementary Figure 18:**  $^{13}\text{C}$  NMR (126 MHz,  $\text{CDCl}_3$ ) spectrum of **3f**.

-16.71

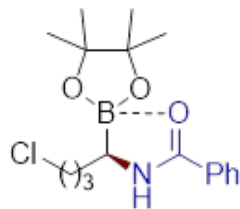

**3f**

$^{11}\text{B}$  NMR (160 MHz,  $\text{CDCl}_3$ )

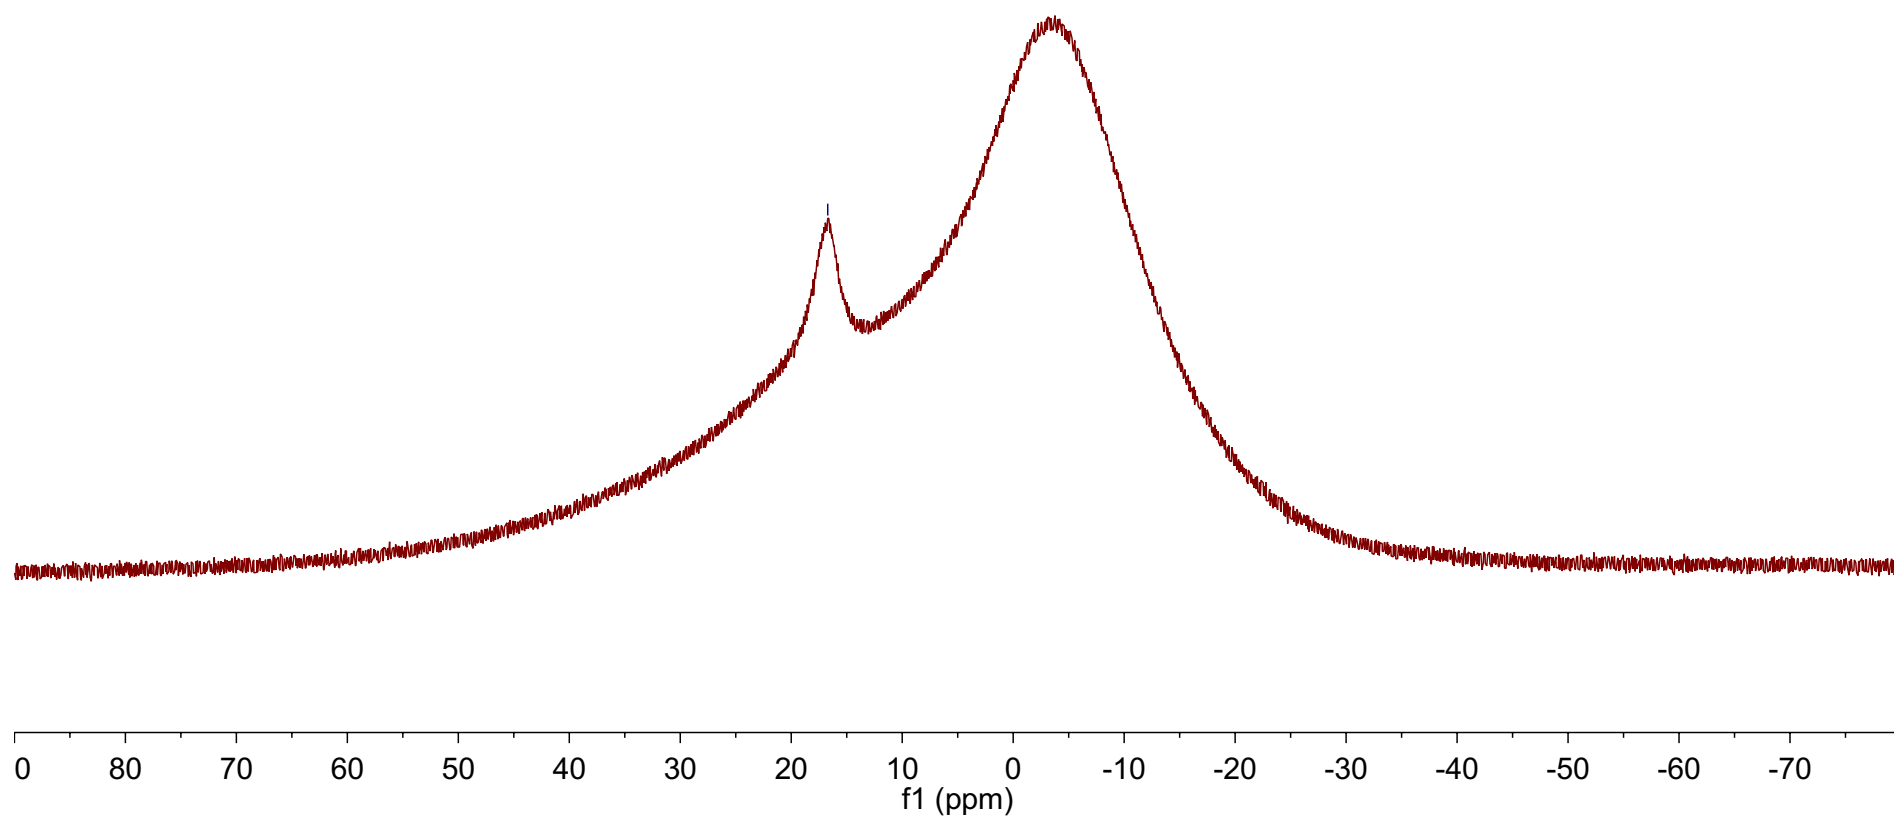

**Supplementary Figure 19:**  $^{11}\text{B}$  NMR (160 MHz,  $\text{CDCl}_3$ ) spectrum of **3f**.

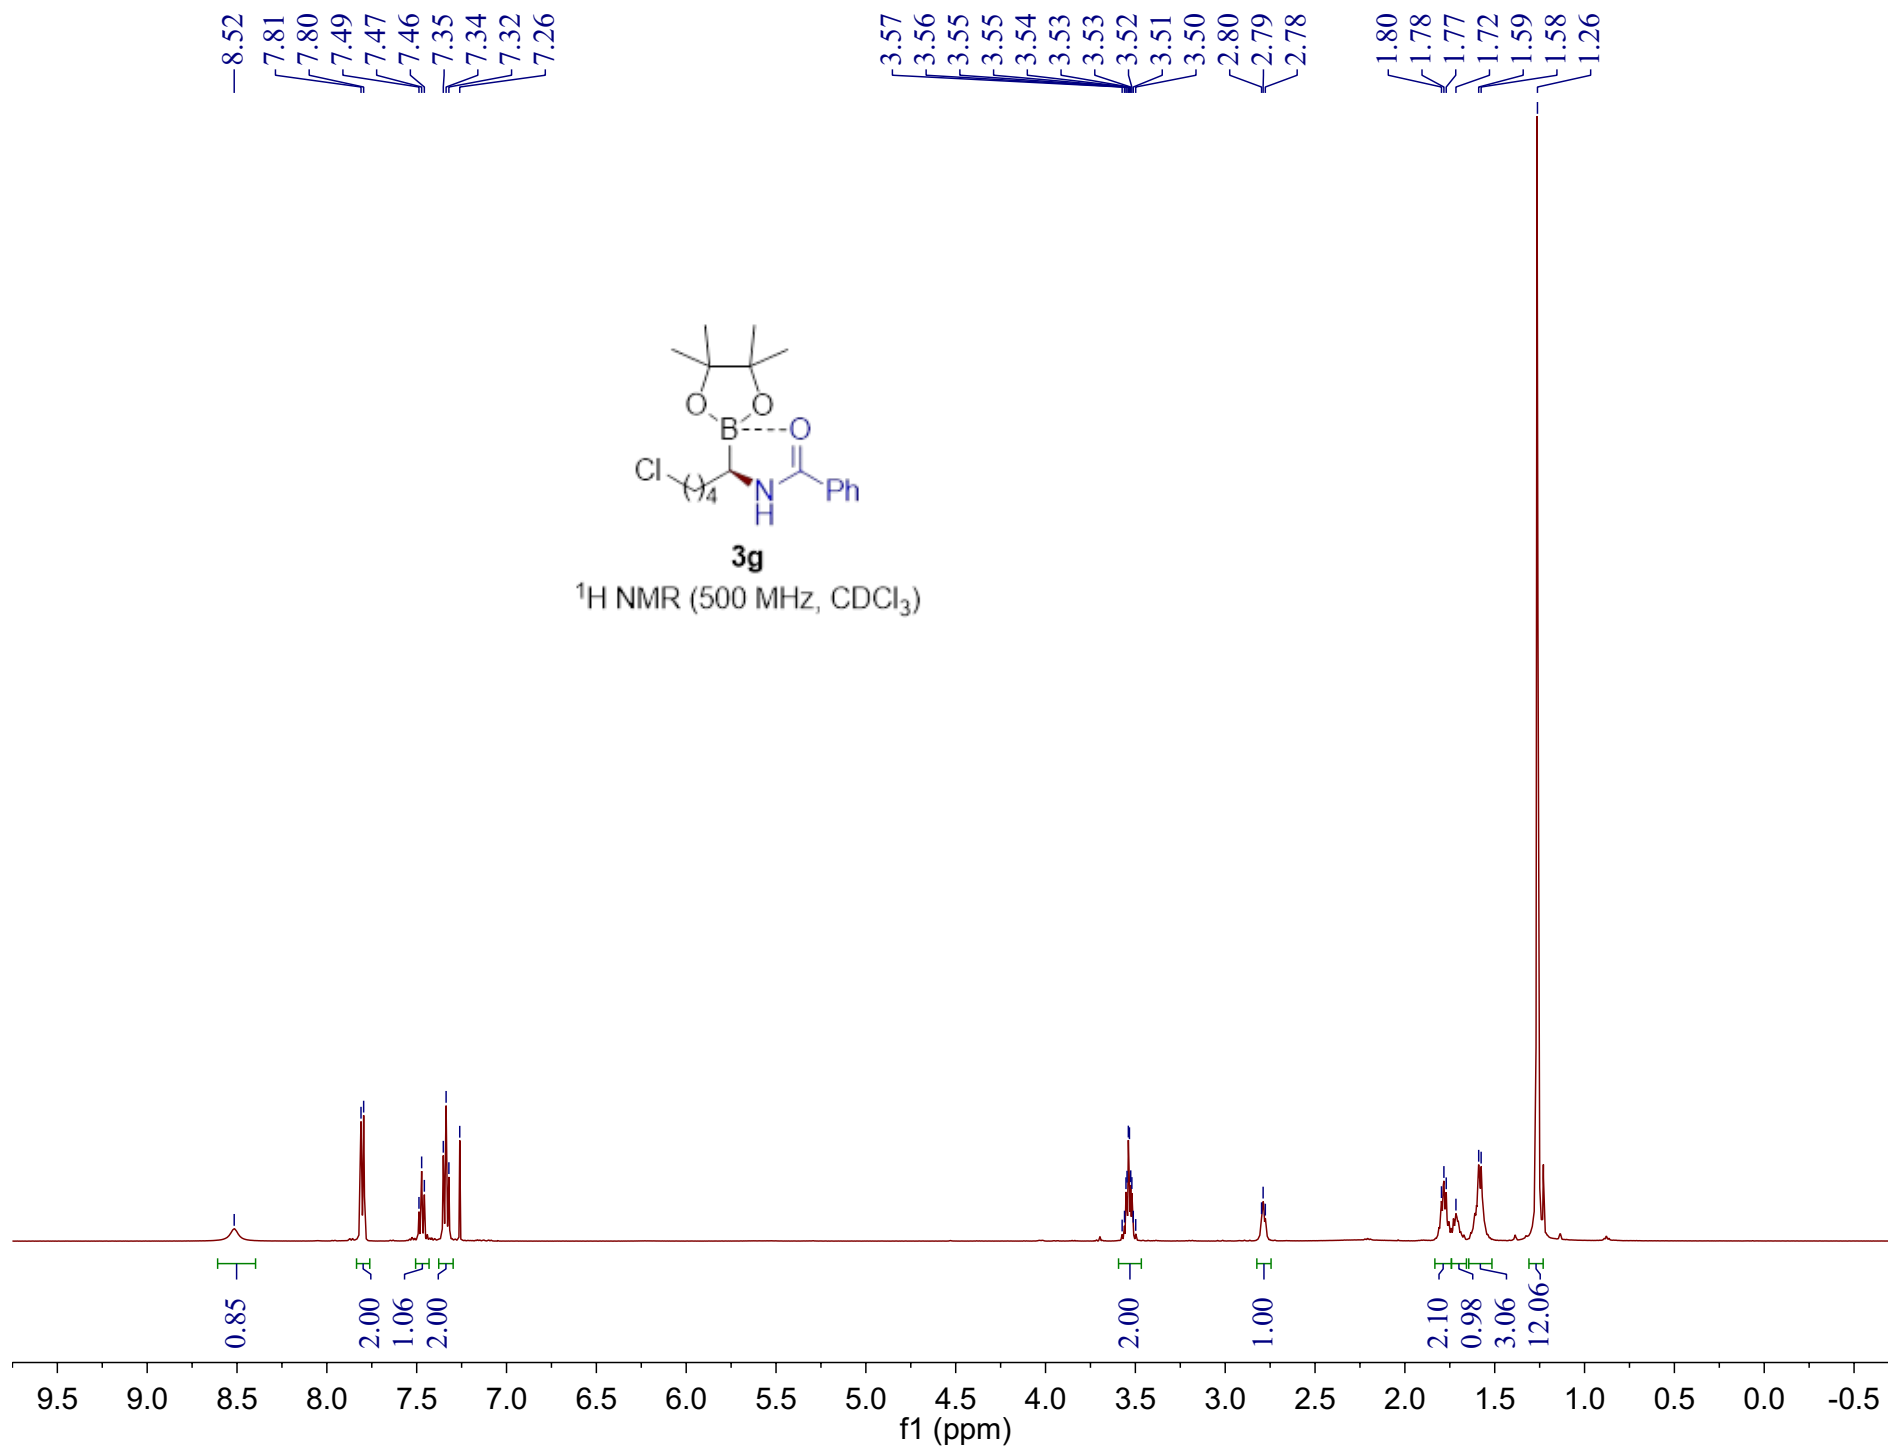

Supplementary Figure 20: <sup>1</sup>H NMR (500 MHz, CDCl<sub>3</sub>) spectrum of **3g**.

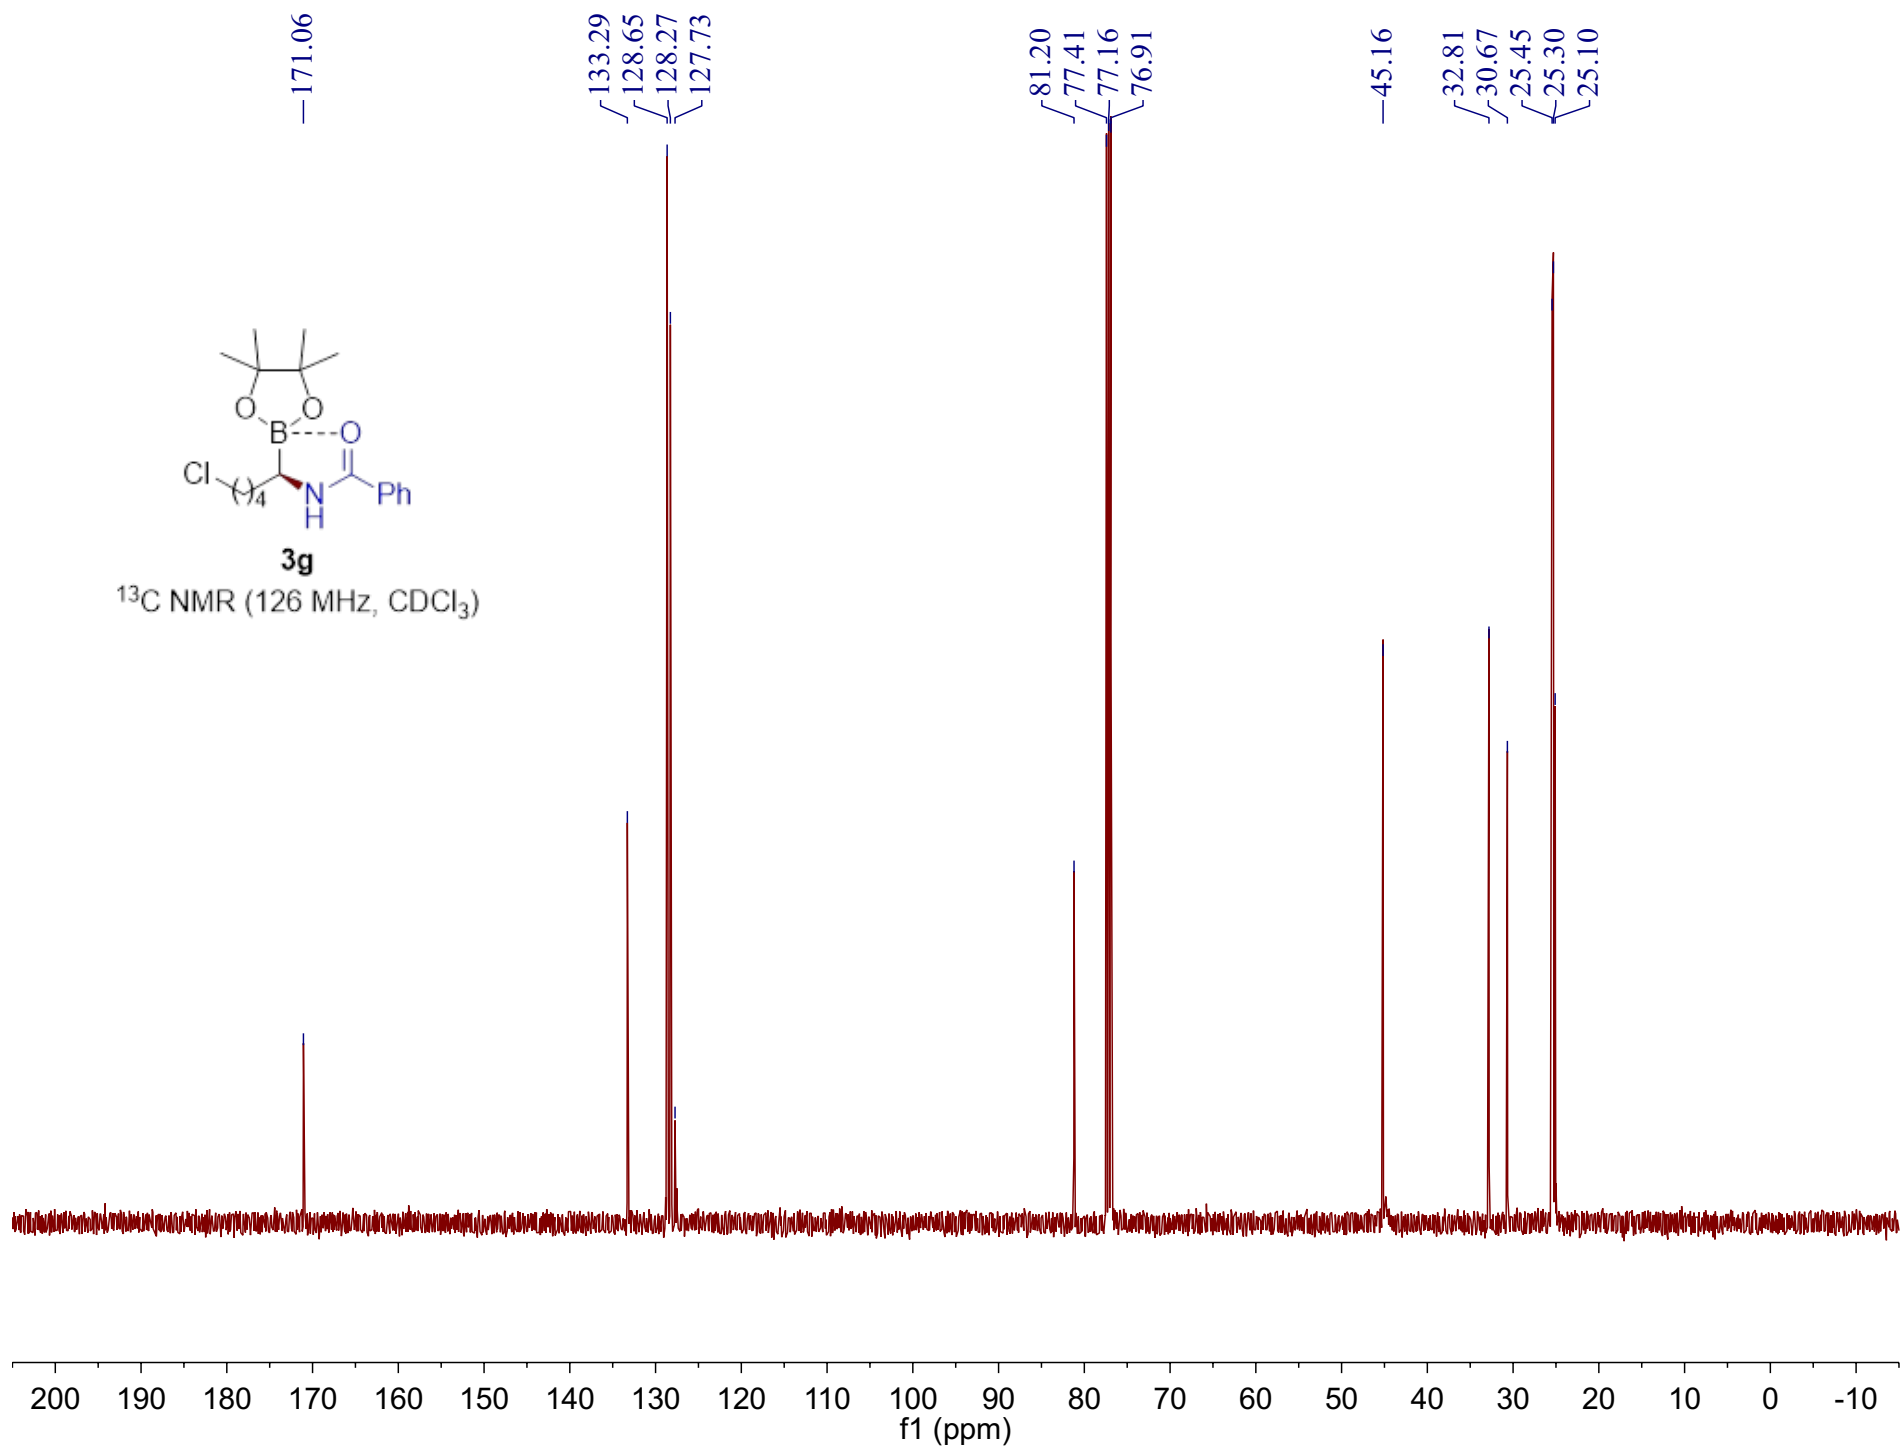

Supplementary Figure 21:  $^{13}\text{C}$  NMR (126 MHz,  $\text{CDCl}_3$ ) spectrum of **3g**.

-17.61

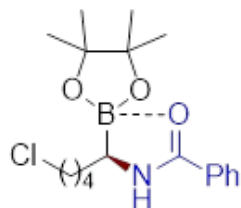

**3g**

$^{11}\text{B}$  NMR (160 MHz,  $\text{CDCl}_3$ )

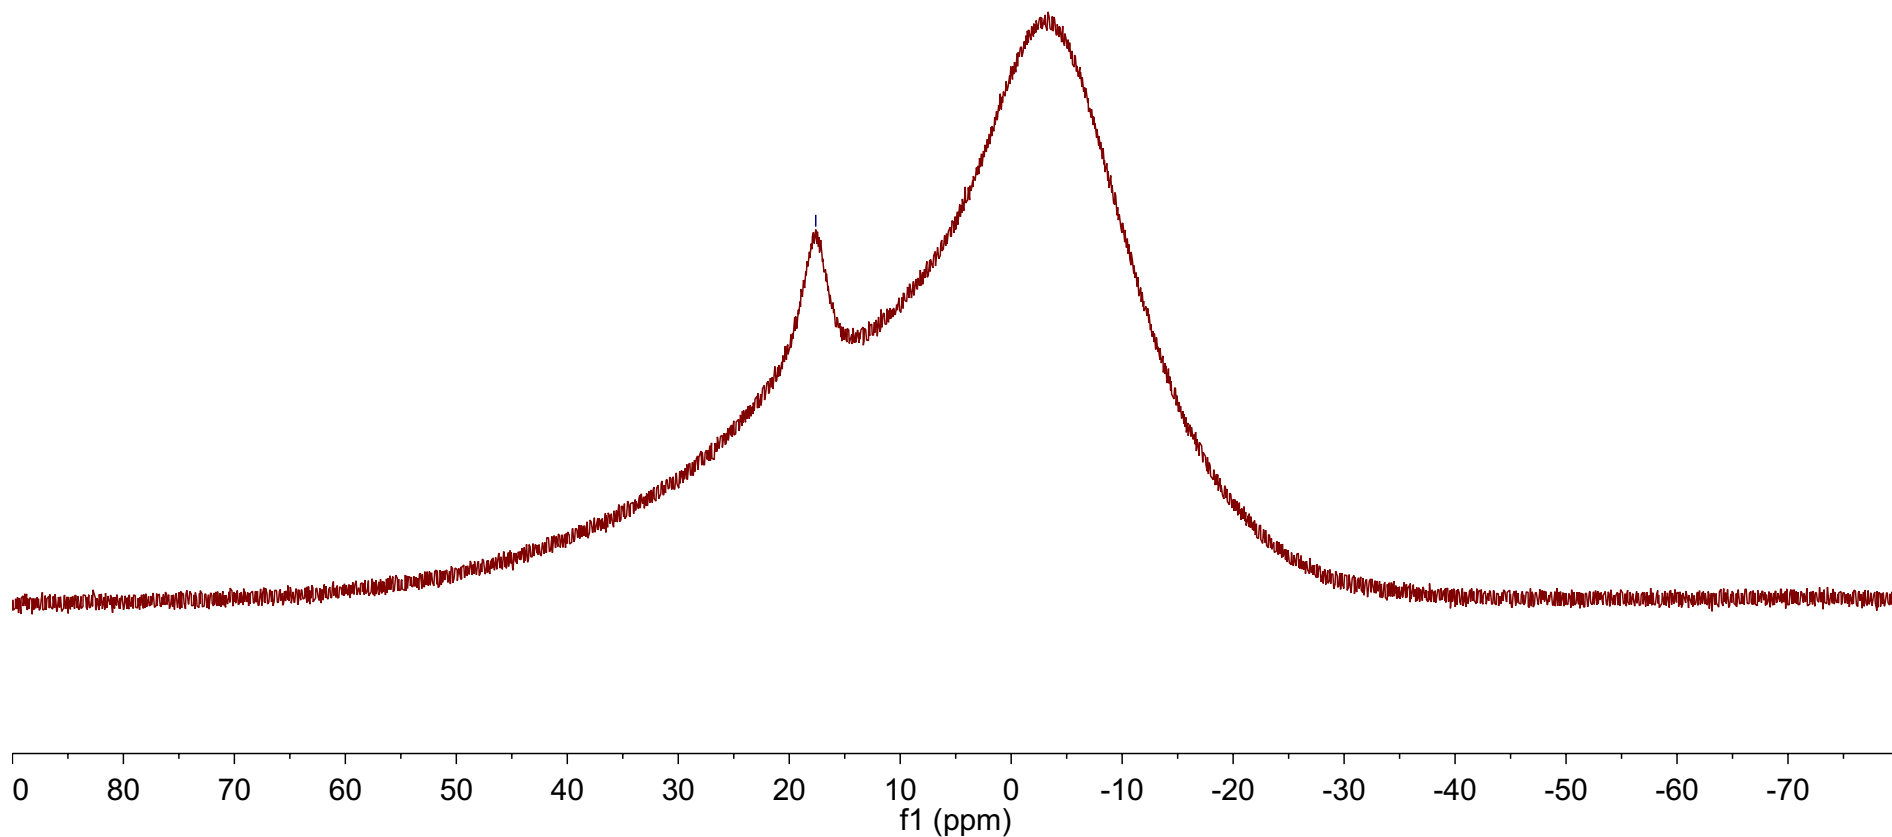

**Supplementary Figure 22:**  $^{11}\text{B}$  NMR (160 MHz,  $\text{CDCl}_3$ ) spectrum of **3g**.

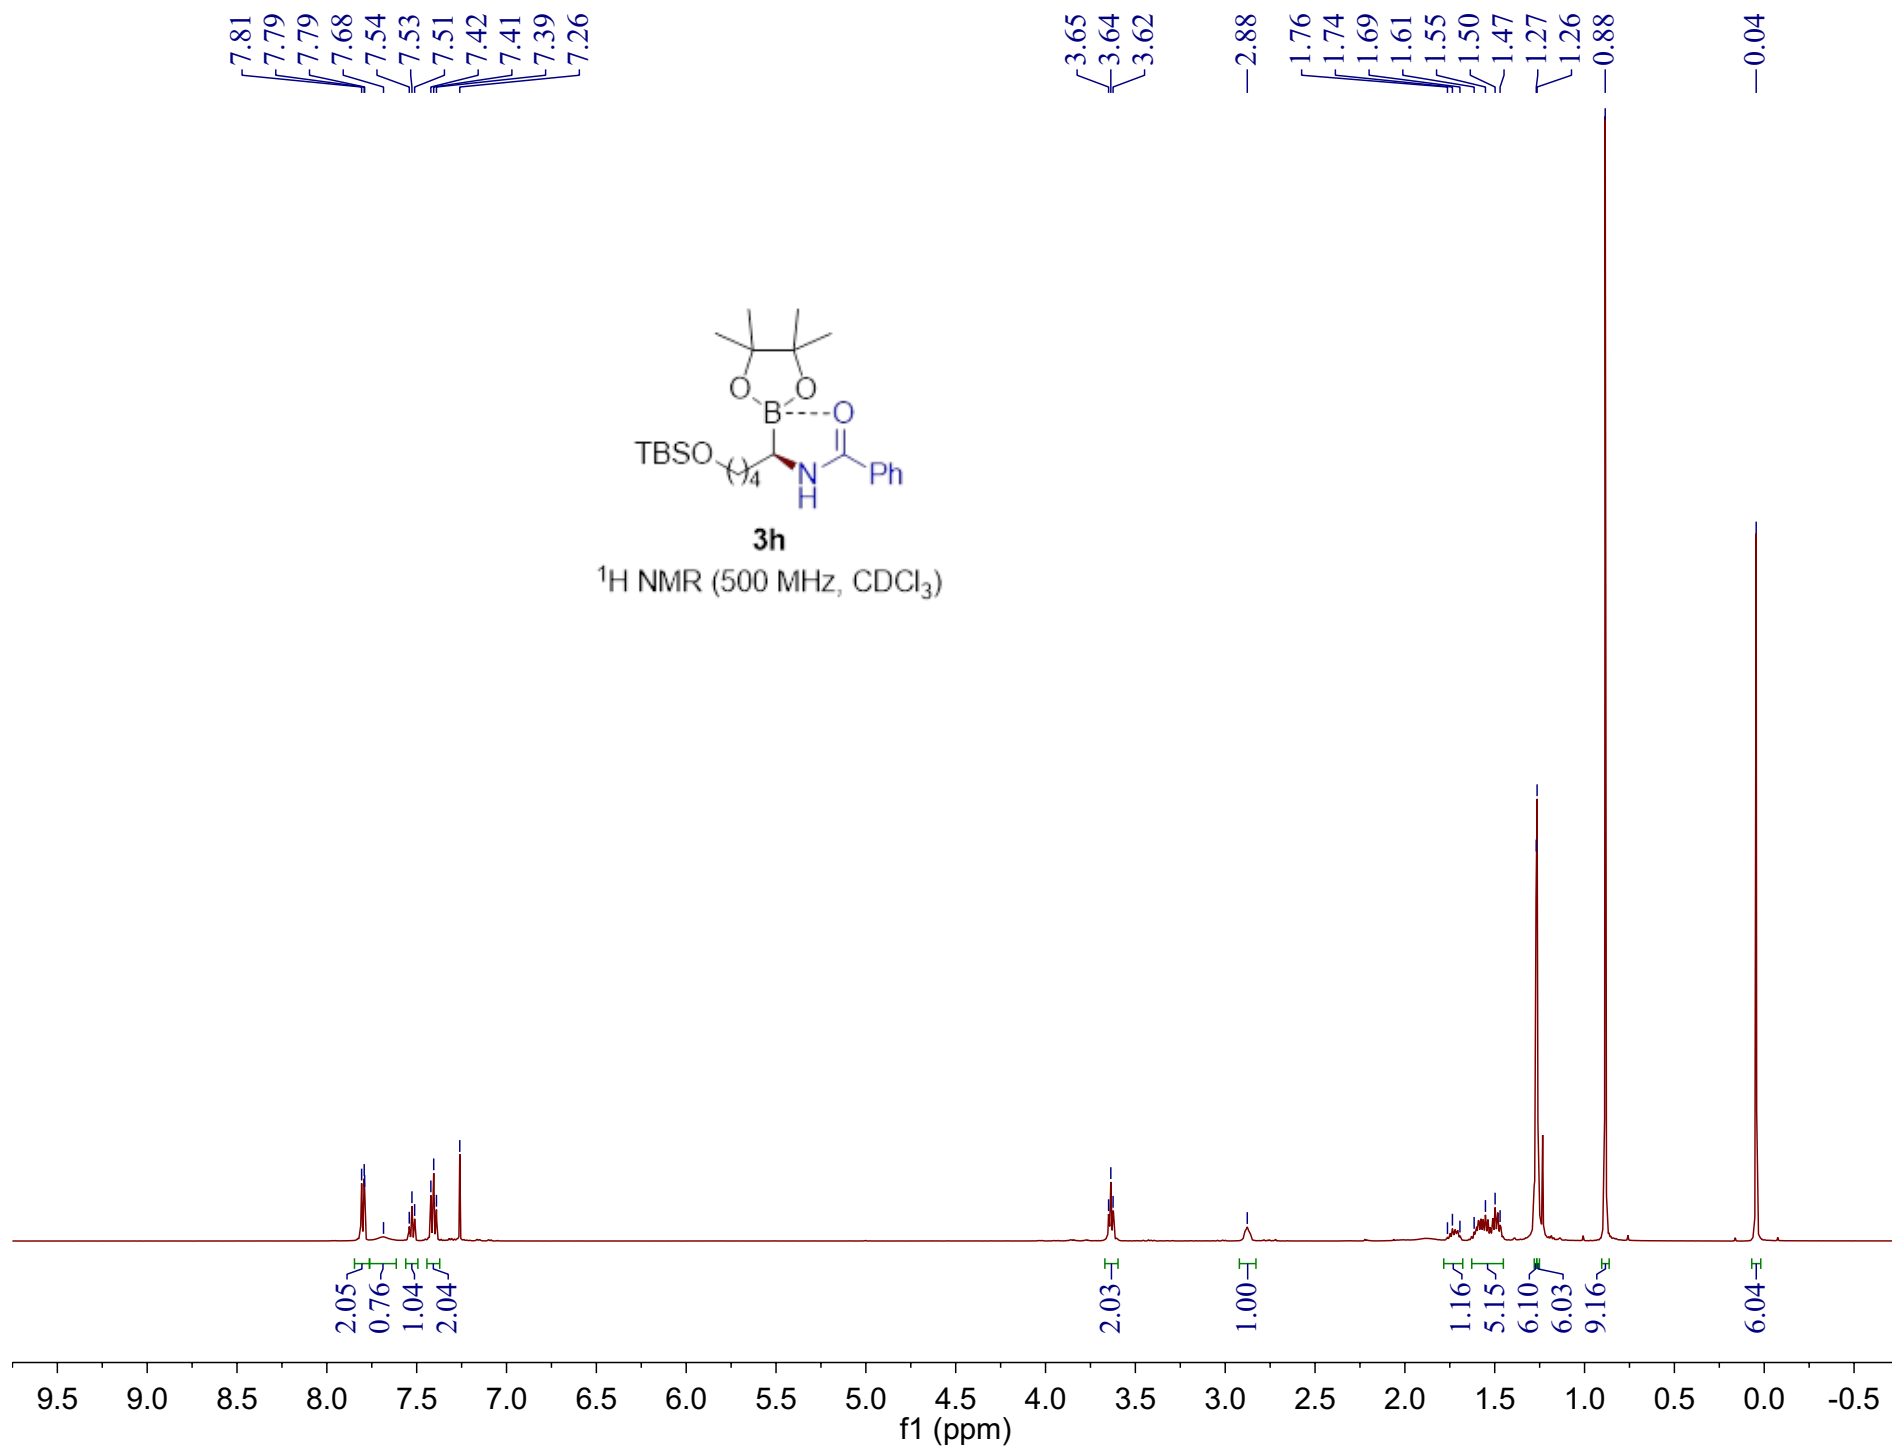

Supplementary Figure 23: <sup>1</sup>H NMR (500 MHz, CDCl<sub>3</sub>) spectrum of **3h**.

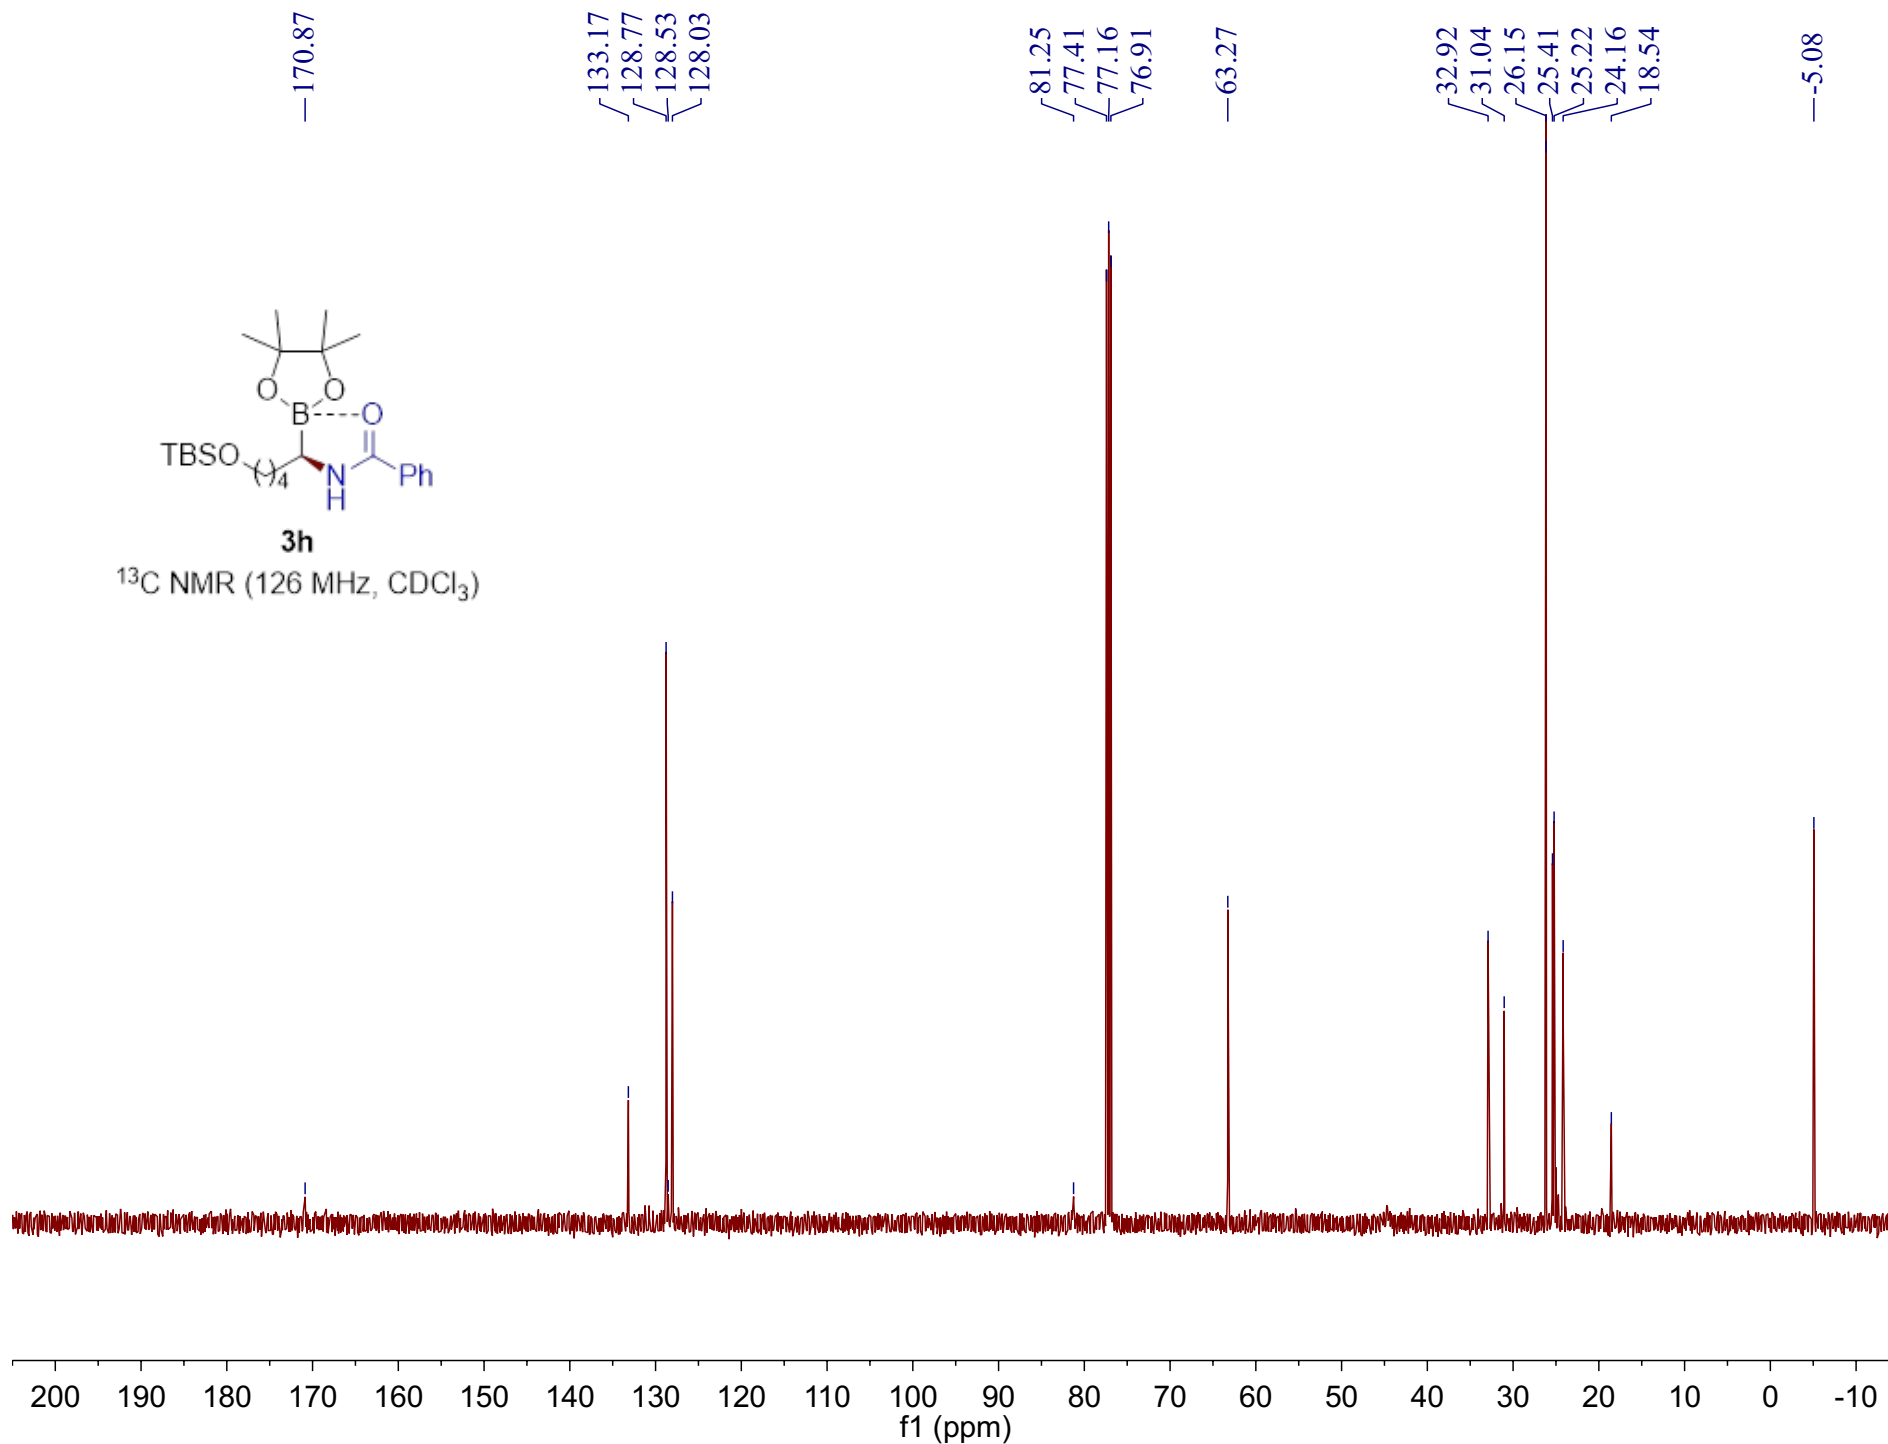

**Supplementary Figure 24:**  $^{13}\text{C}$  NMR (126 MHz,  $\text{CDCl}_3$ ) spectrum of **3h**.



-18.94

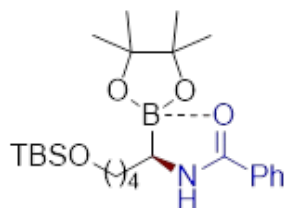

**3h**

$^{11}\text{B}$  NMR (160 MHz,  $\text{CDCl}_3$ )

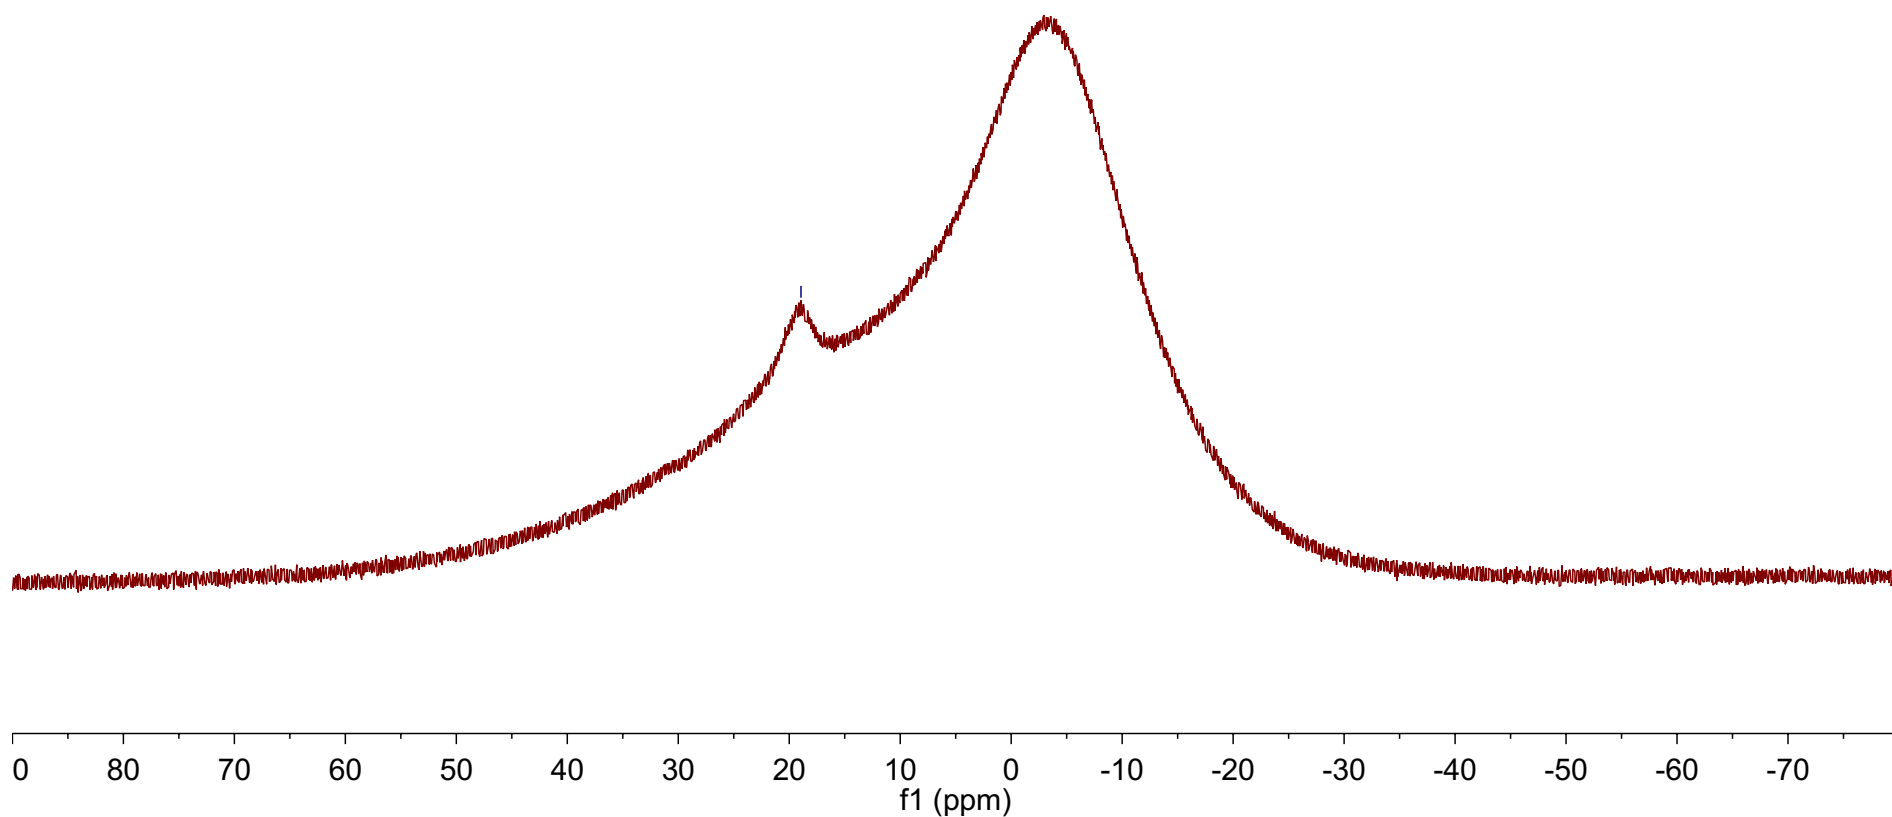

**Supplementary Figure 25:**  $^{11}\text{B}$  NMR (160 MHz,  $\text{CDCl}_3$ ) spectrum of **3h**.

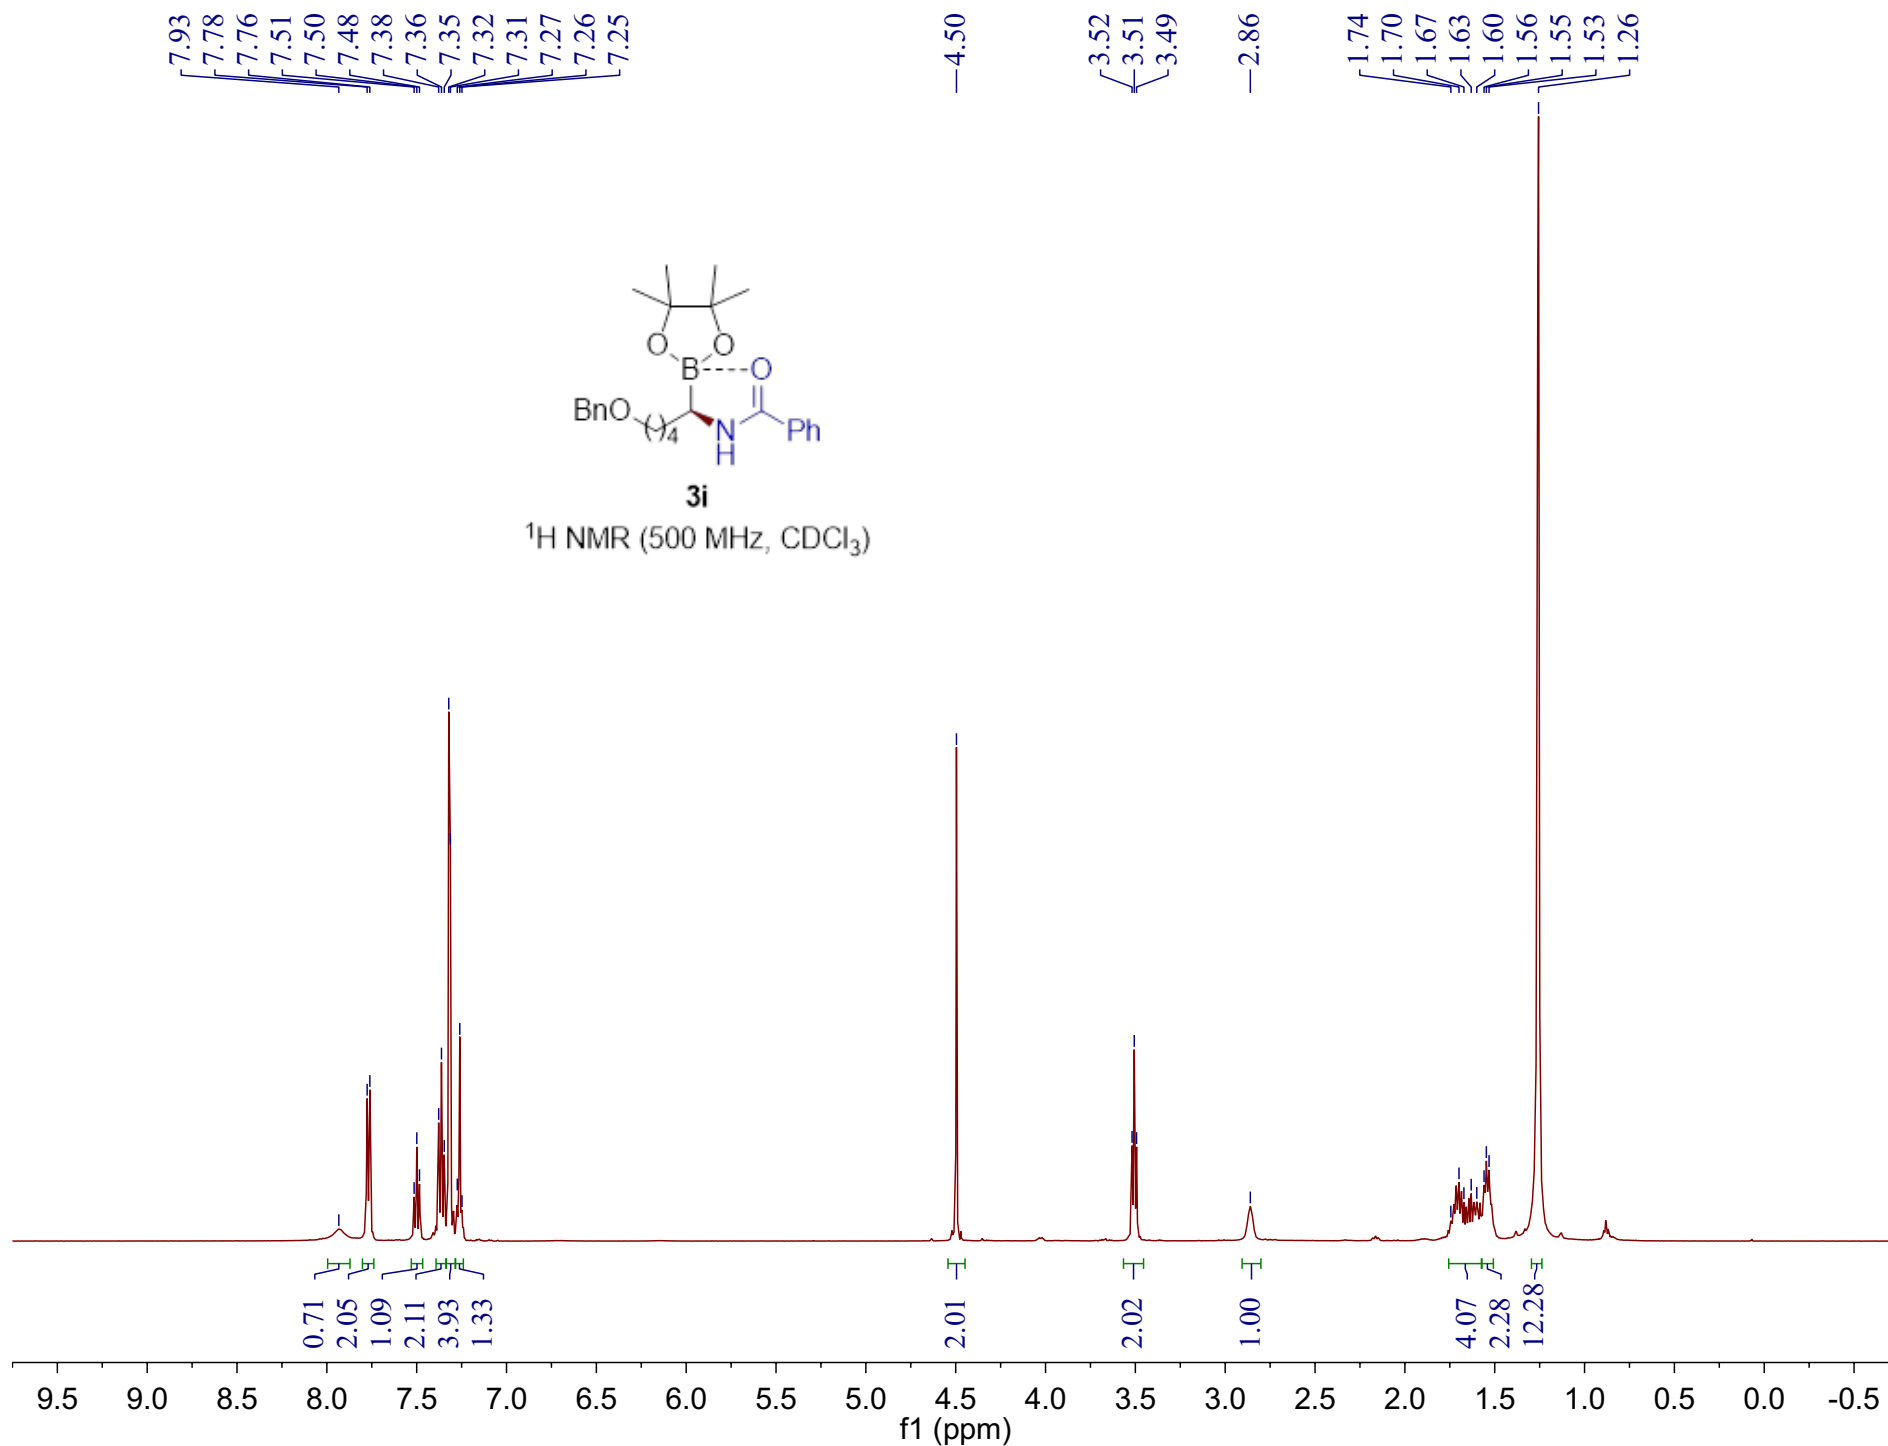

Supplementary Figure 26: <sup>1</sup>H NMR (500 MHz, CDCl<sub>3</sub>) spectrum of **3i**.

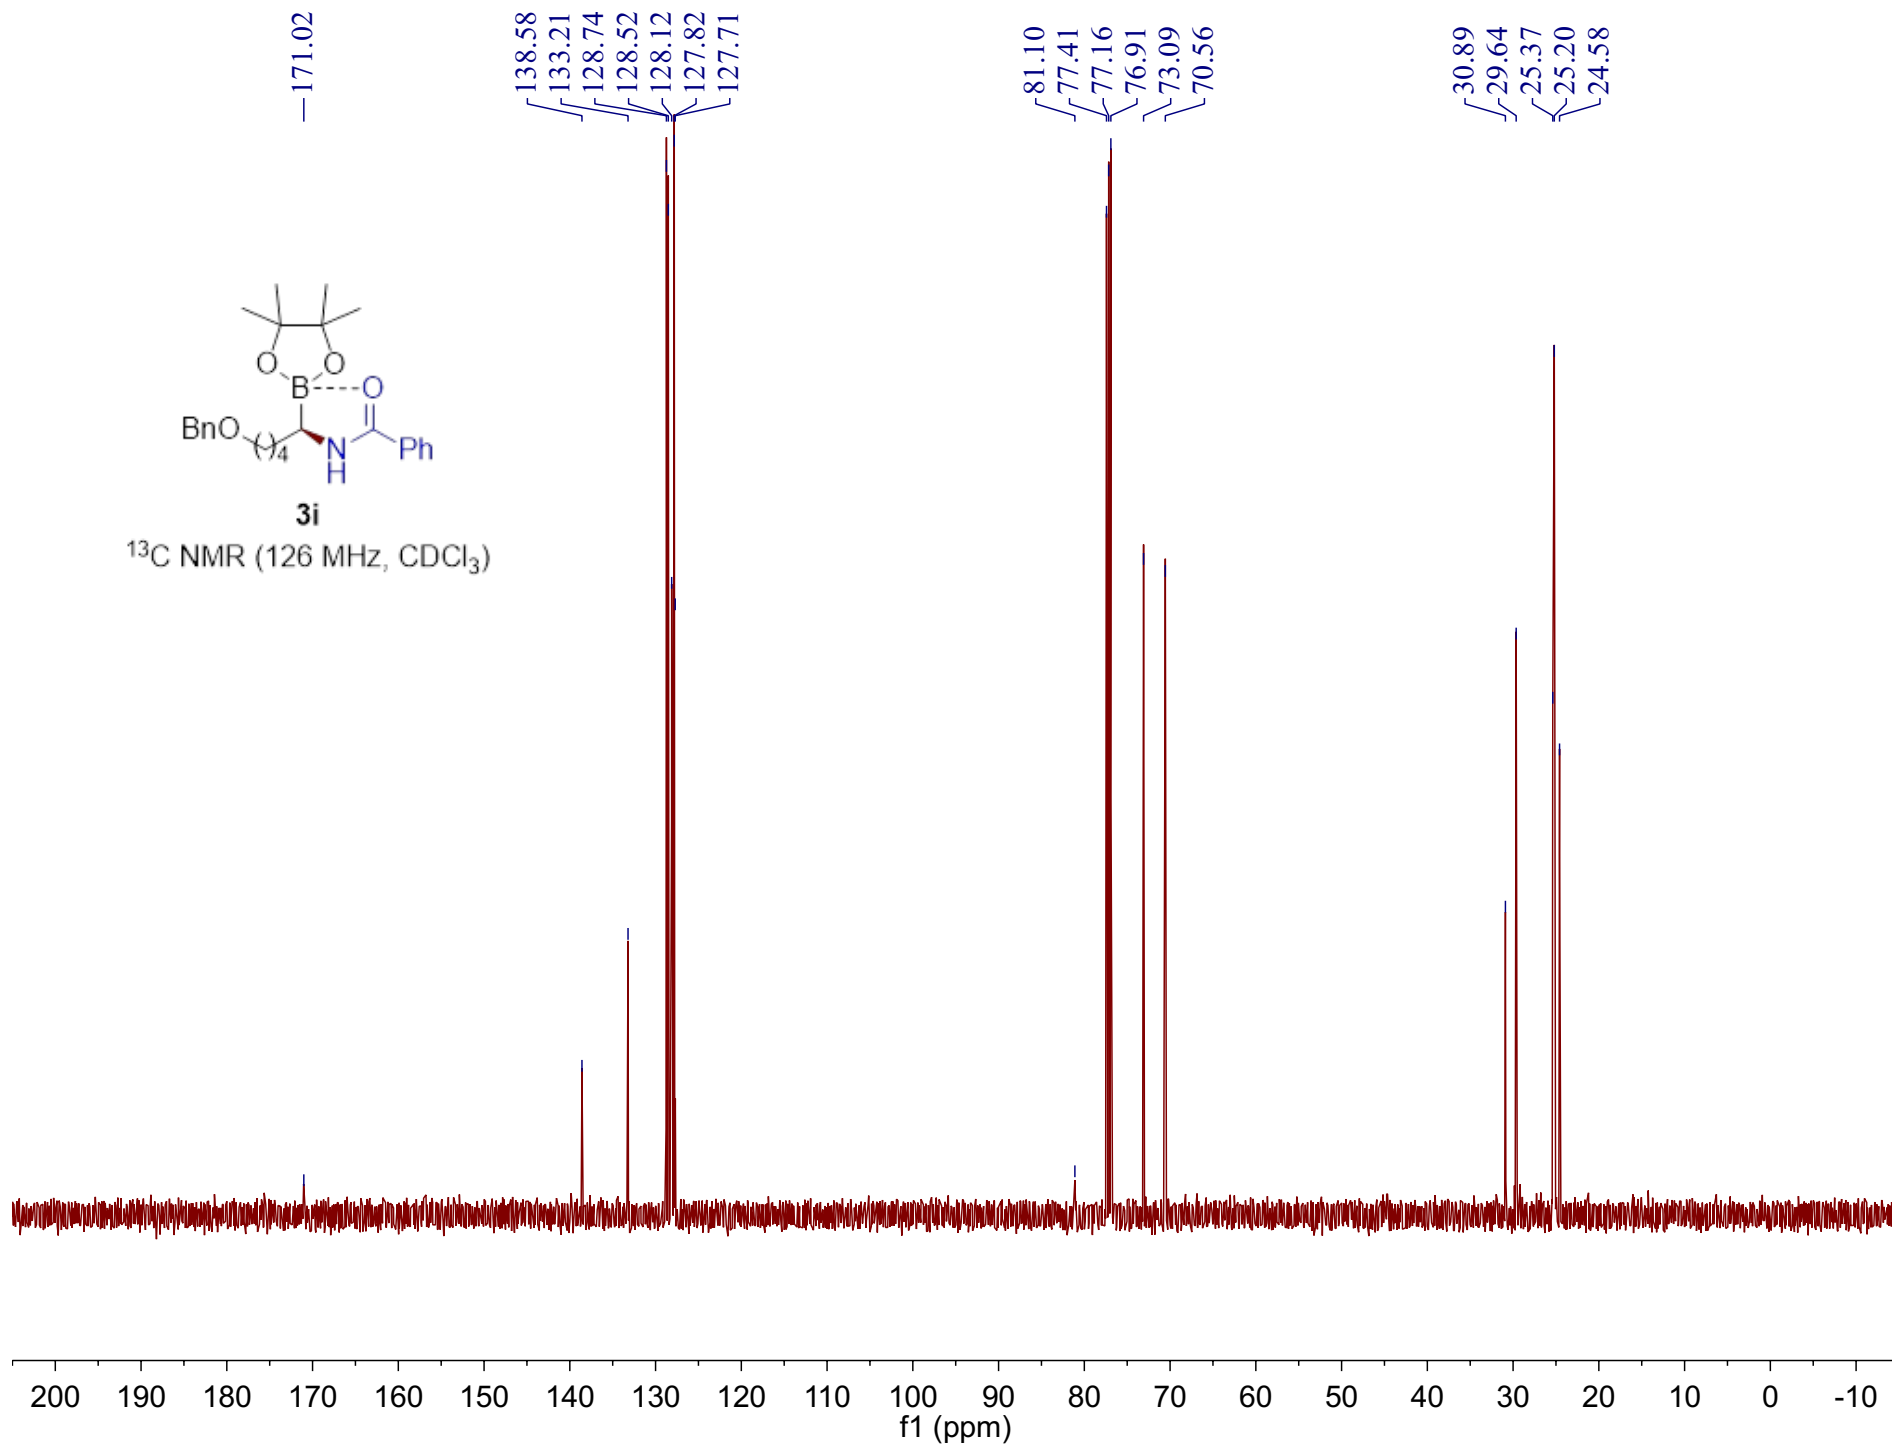

Supplementary Figure 27:  $^{13}\text{C}$  NMR (126 MHz,  $\text{CDCl}_3$ ) spectrum of **3i**.

-18.33

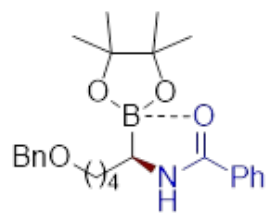

**3i**

$^{11}\text{B}$  NMR (160 MHz,  $\text{CDCl}_3$ )

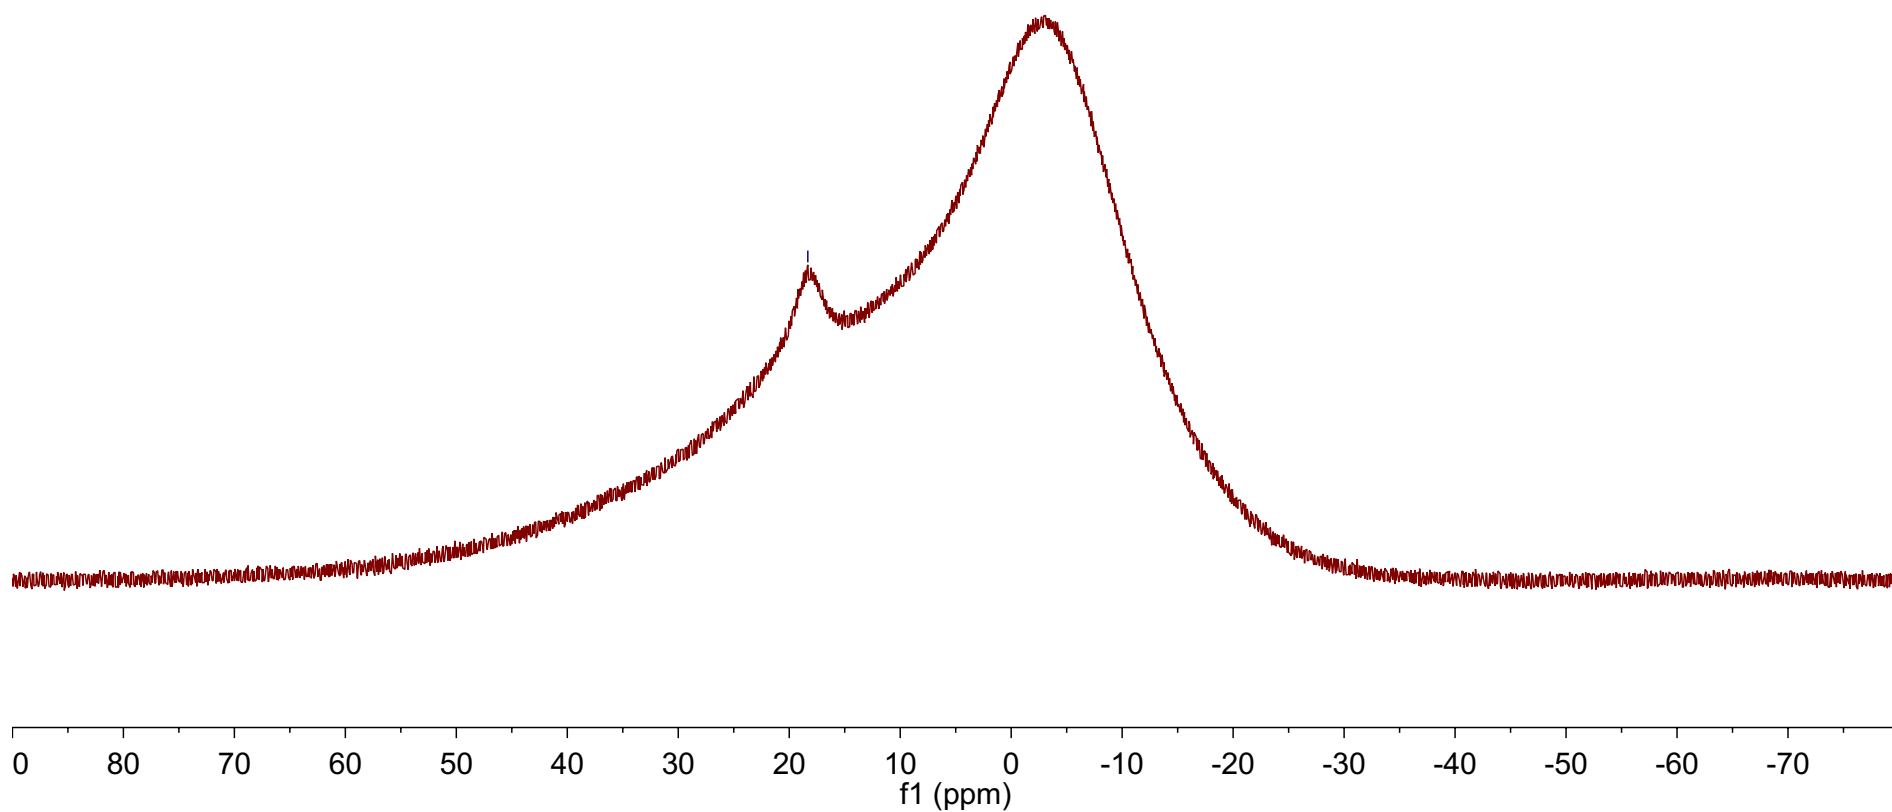

**Supplementary Figure 28:**  $^{11}\text{B}$  NMR (160 MHz,  $\text{CDCl}_3$ ) spectrum of **3i**.

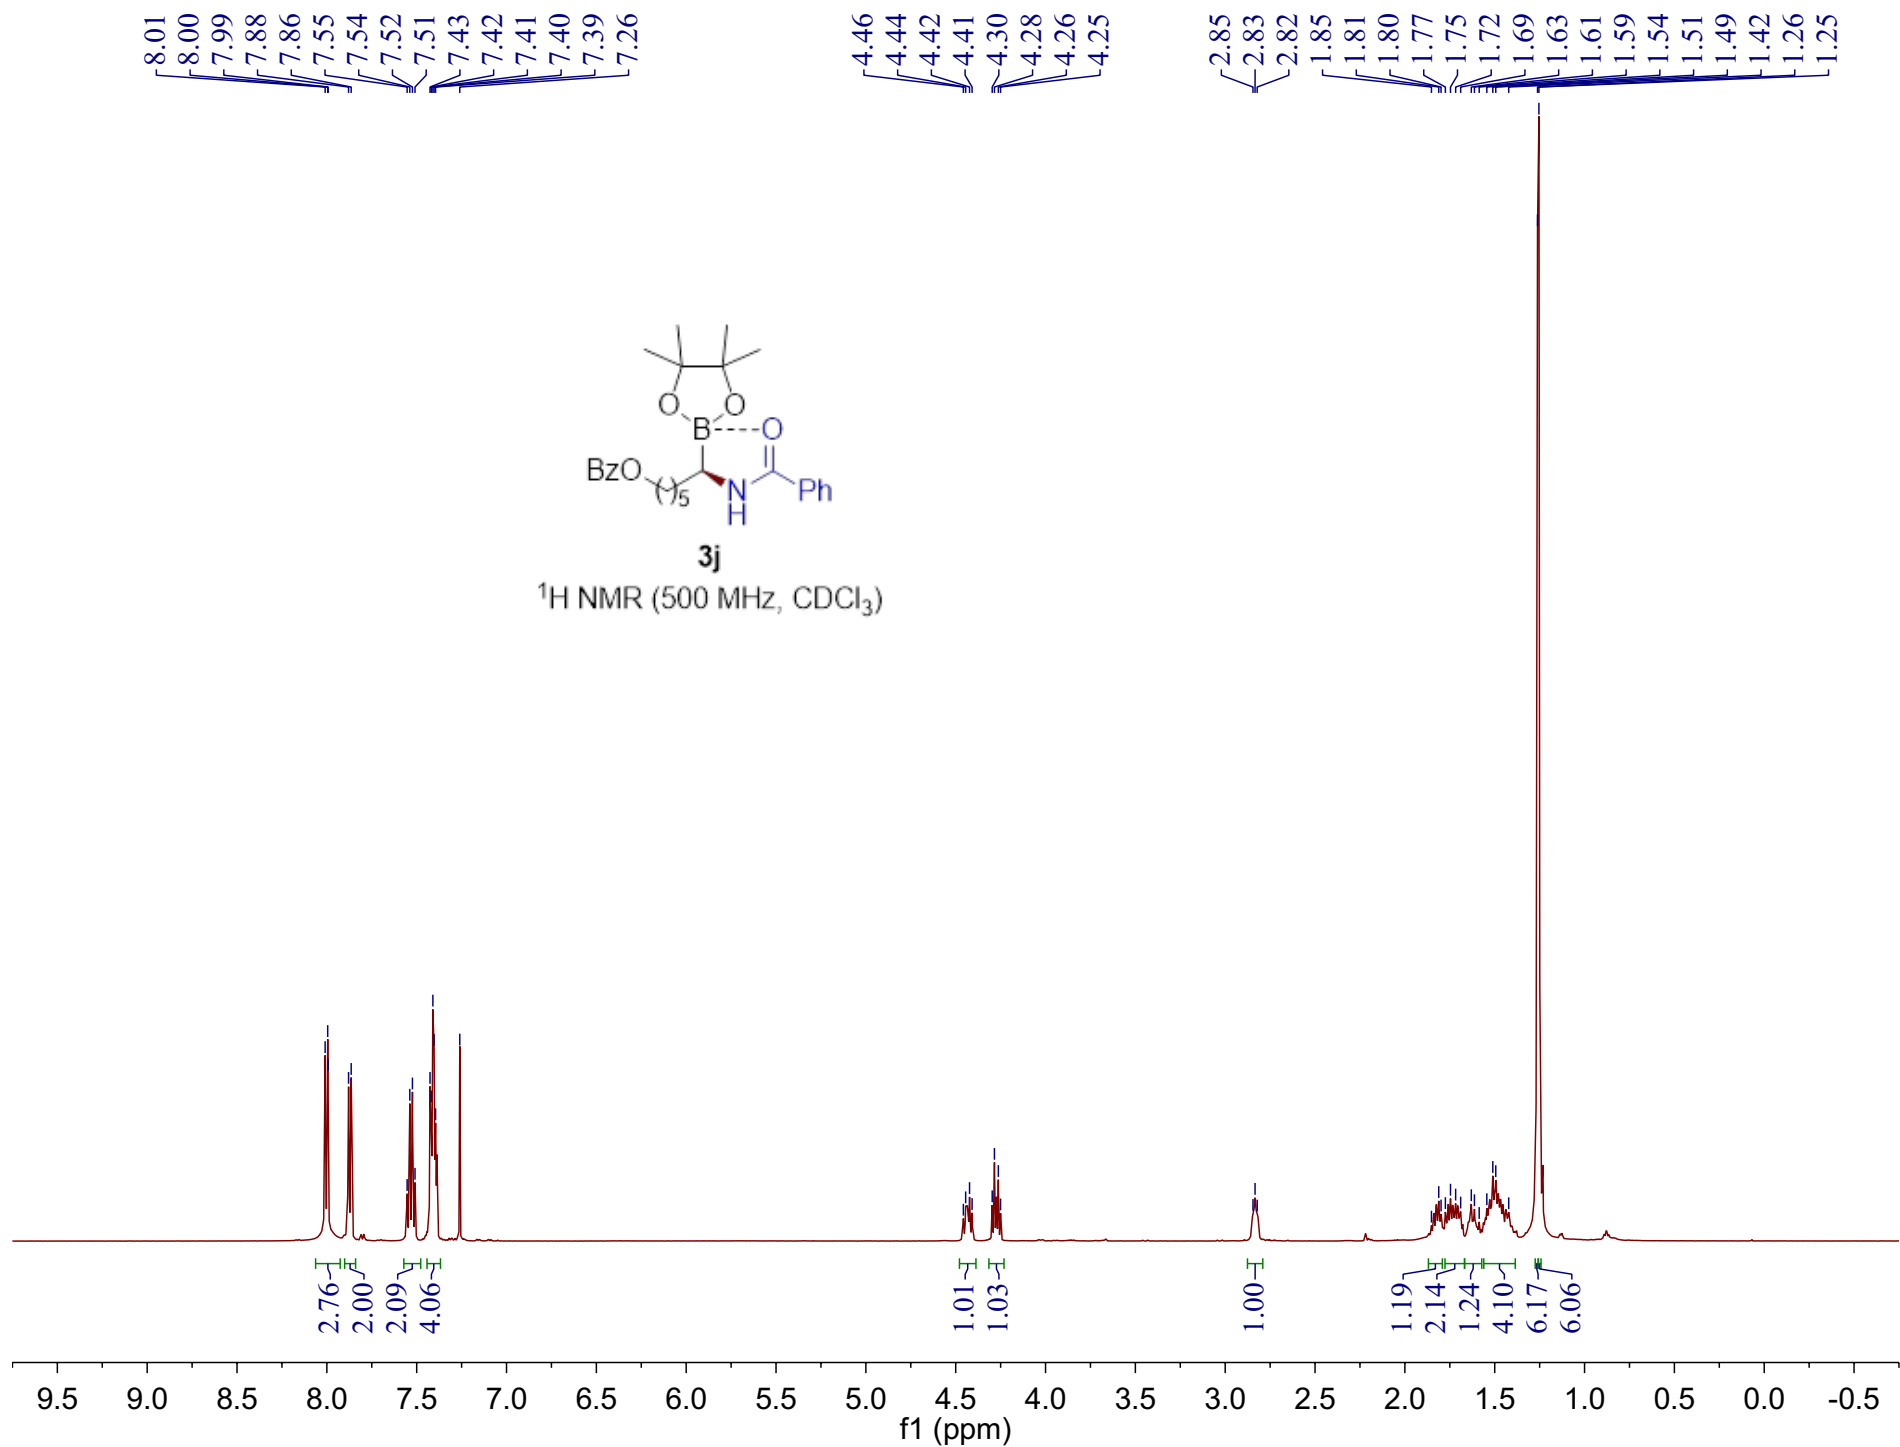

**Supplementary Figure 29:** <sup>1</sup>H NMR (500 MHz, CDCl<sub>3</sub>) spectrum of **3j**.

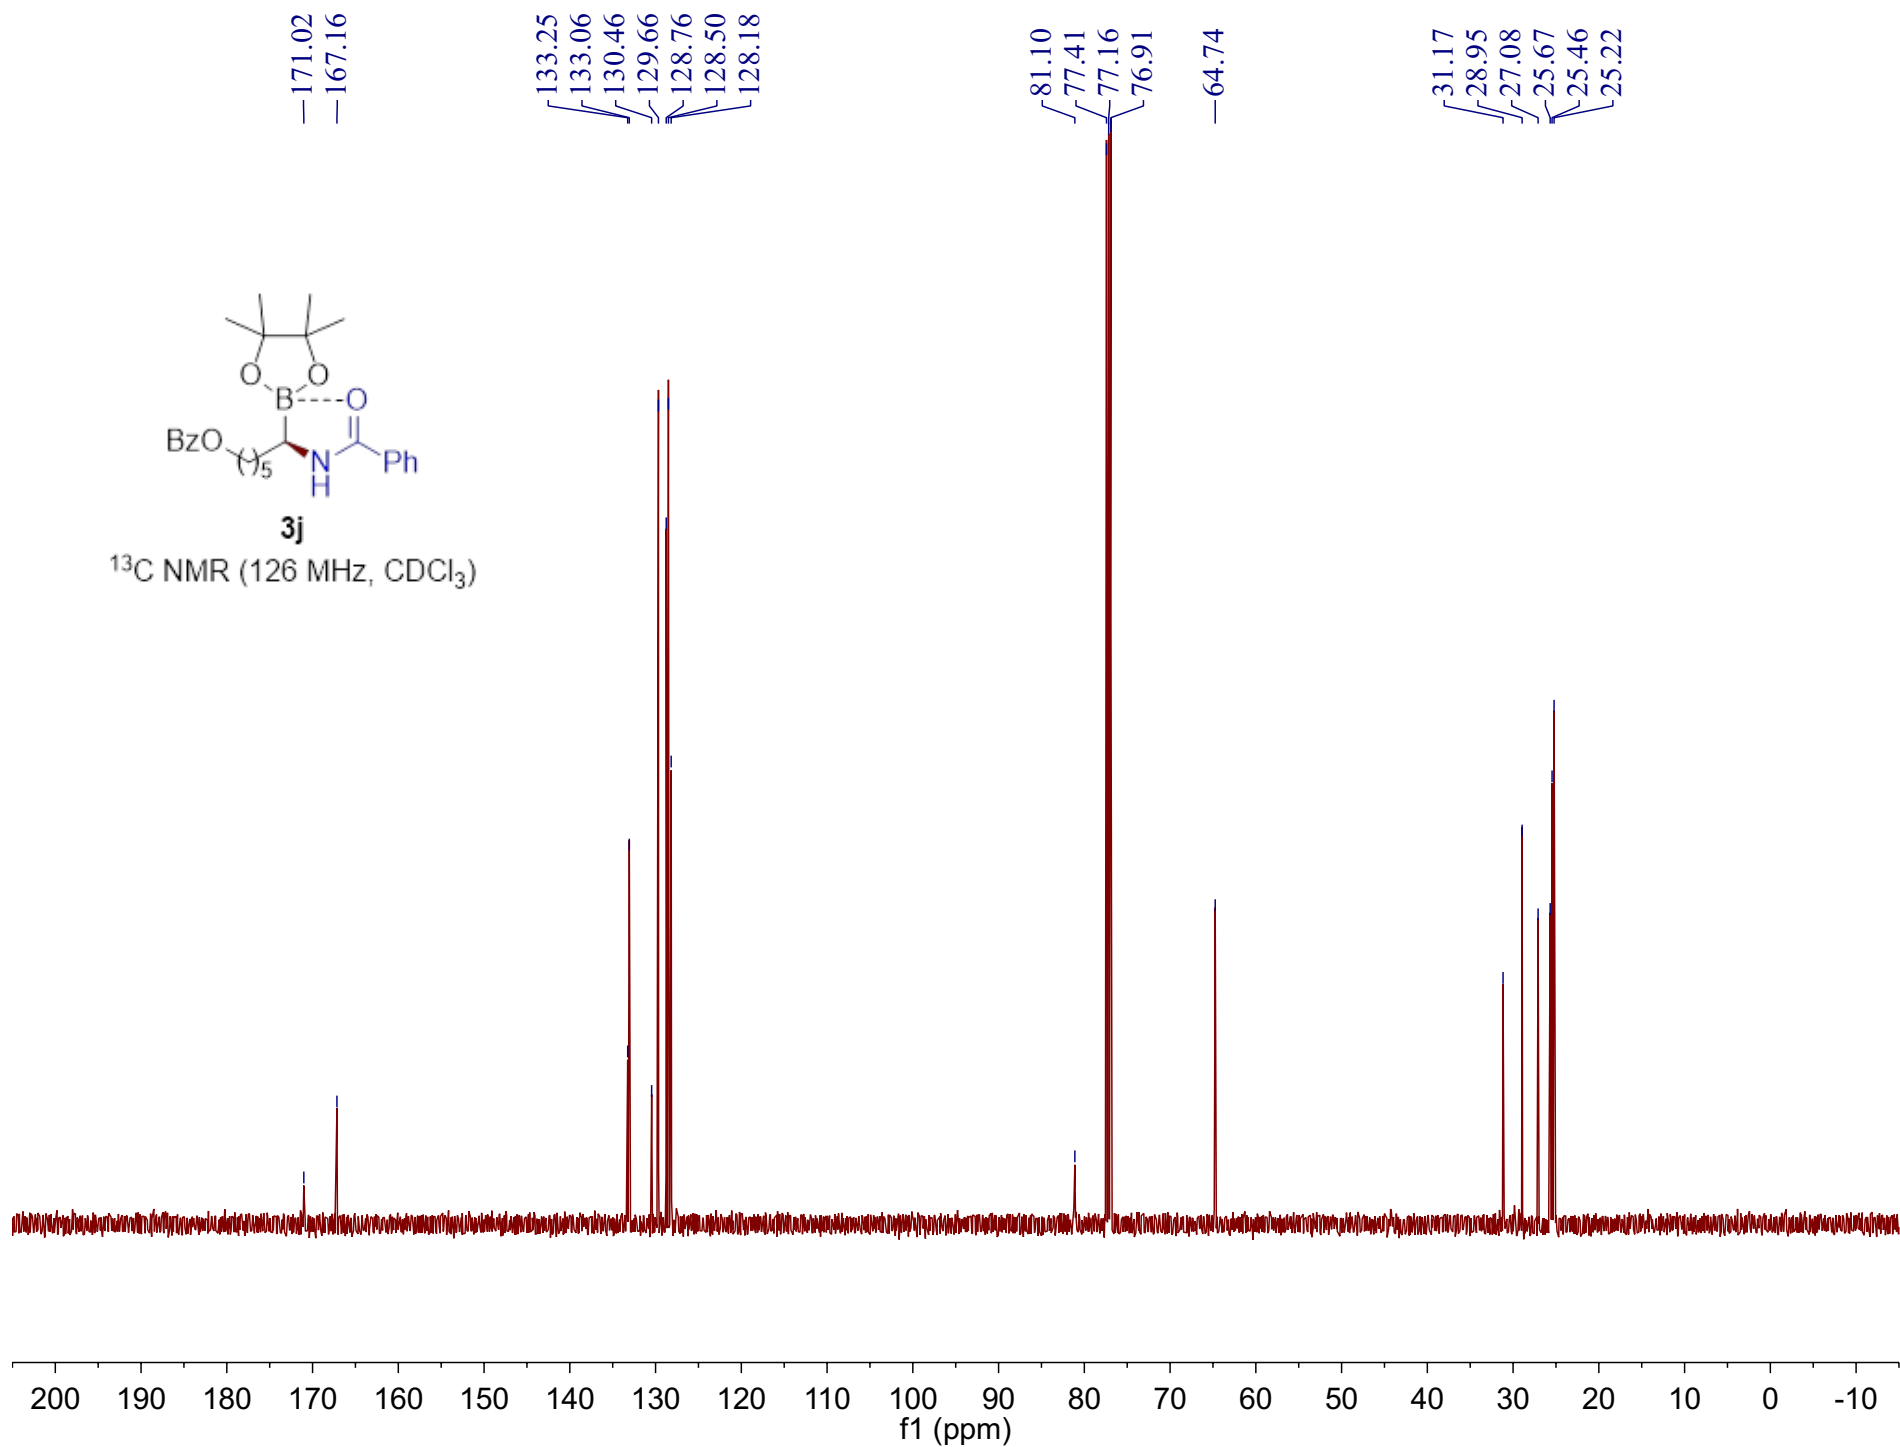

Supplementary Figure 30: <sup>13</sup>C NMR (126 MHz, CDCl<sub>3</sub>) spectrum of **3j**.

-18.16

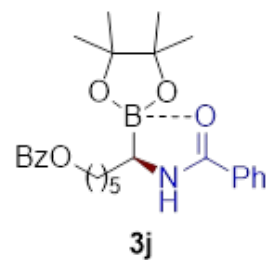

<sup>11</sup>B NMR (160 MHz, CDCl<sub>3</sub>)

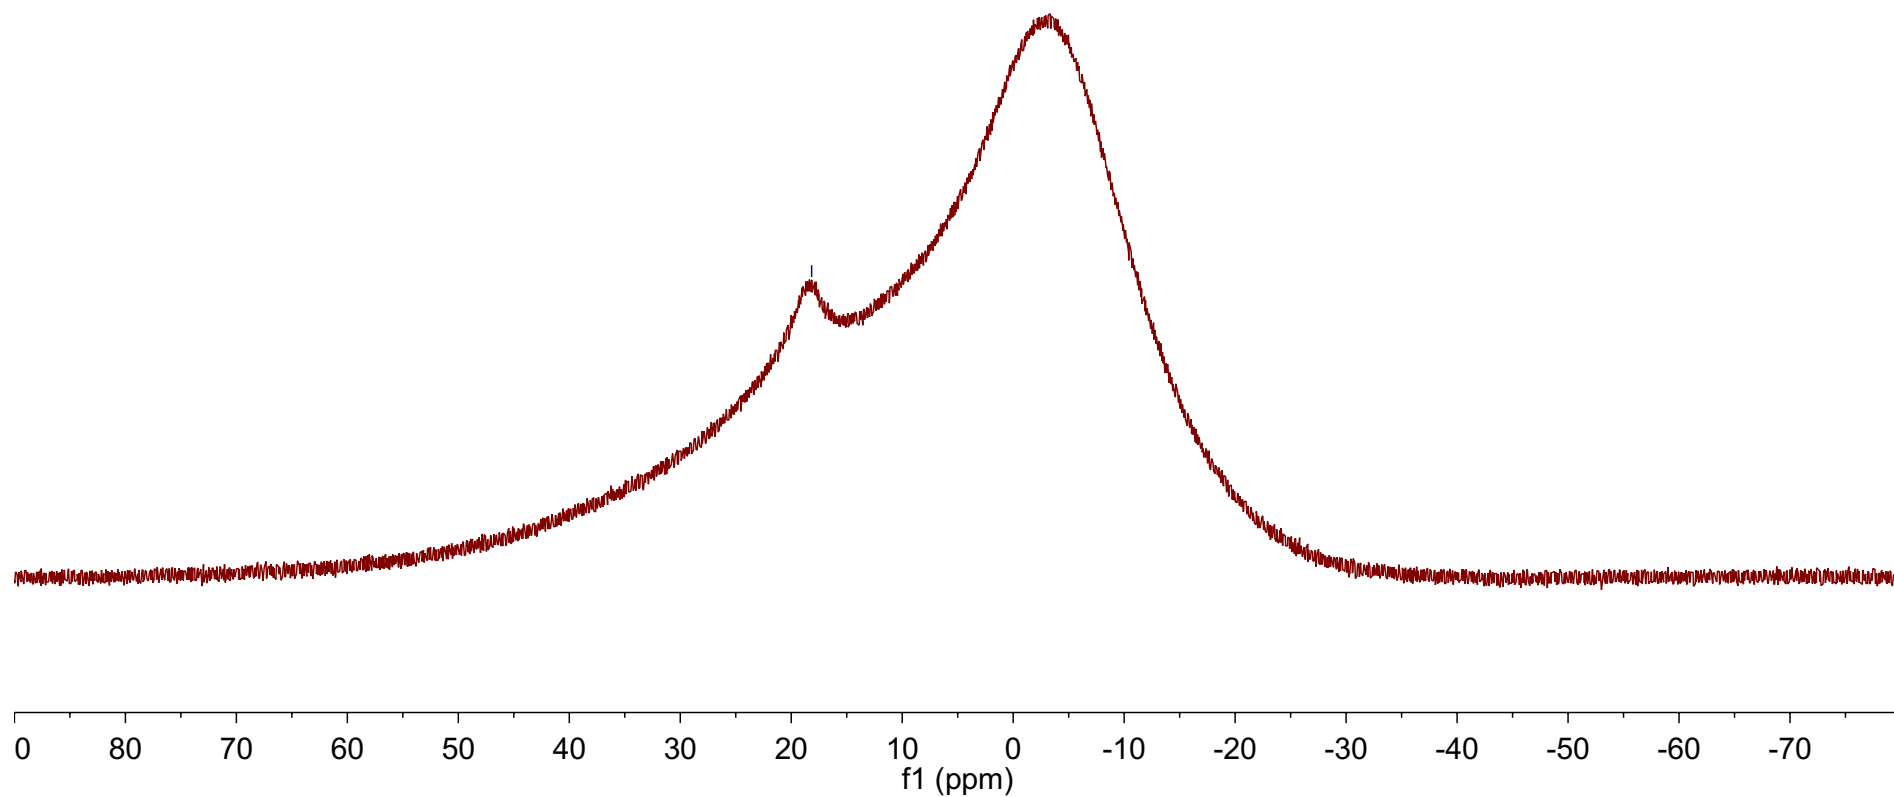

Supplementary Figure 31: <sup>11</sup>B NMR (160 MHz, CDCl<sub>3</sub>) spectrum of **3j**.

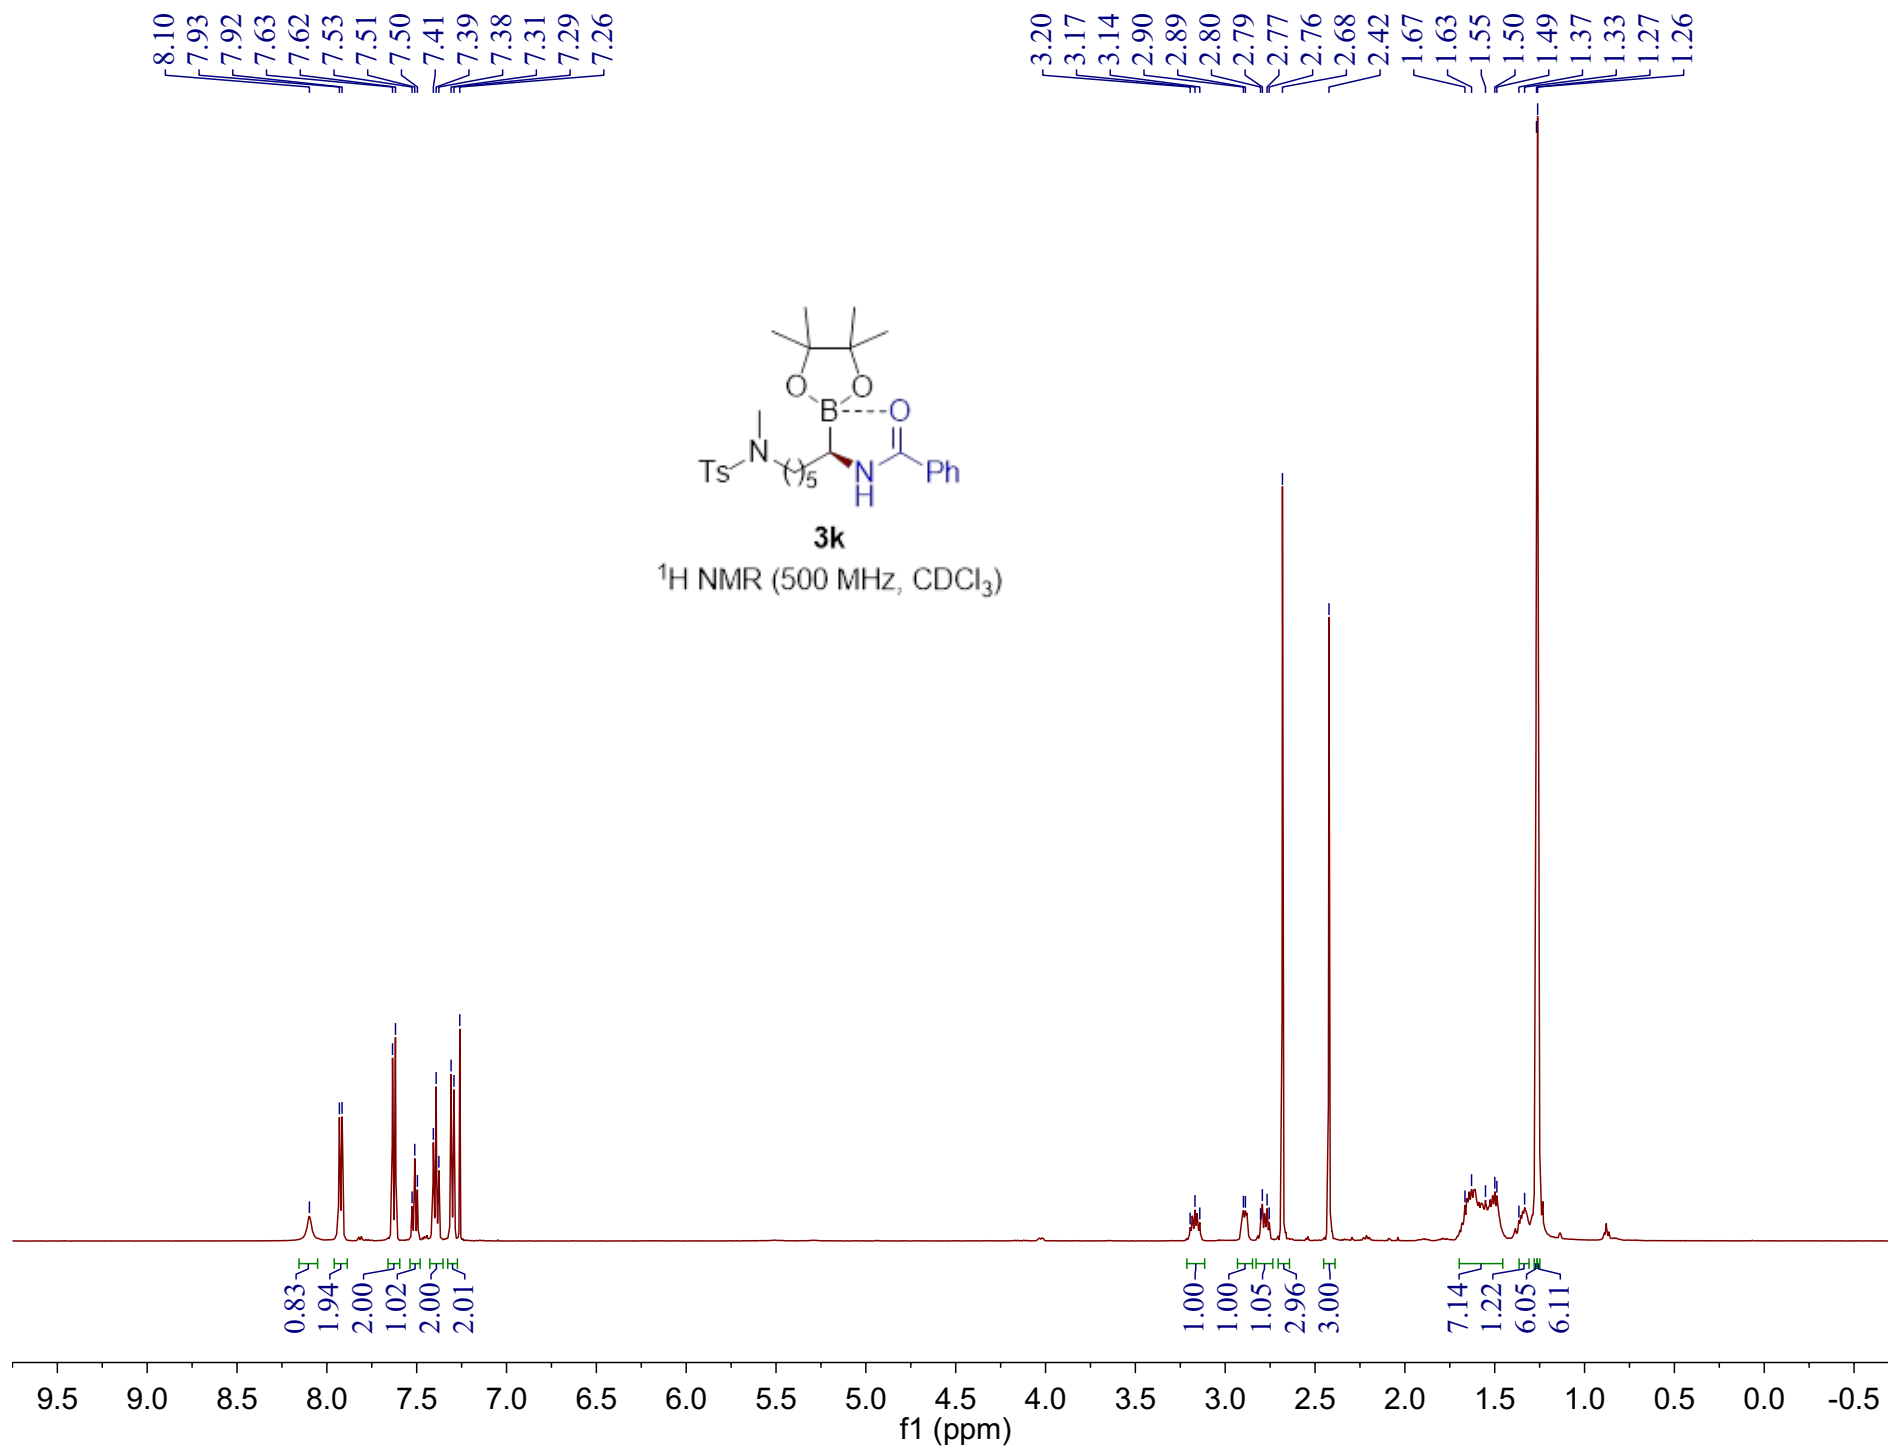

Supplementary Figure 32: <sup>1</sup>H NMR (500 MHz, CDCl<sub>3</sub>) spectrum of **3k**.



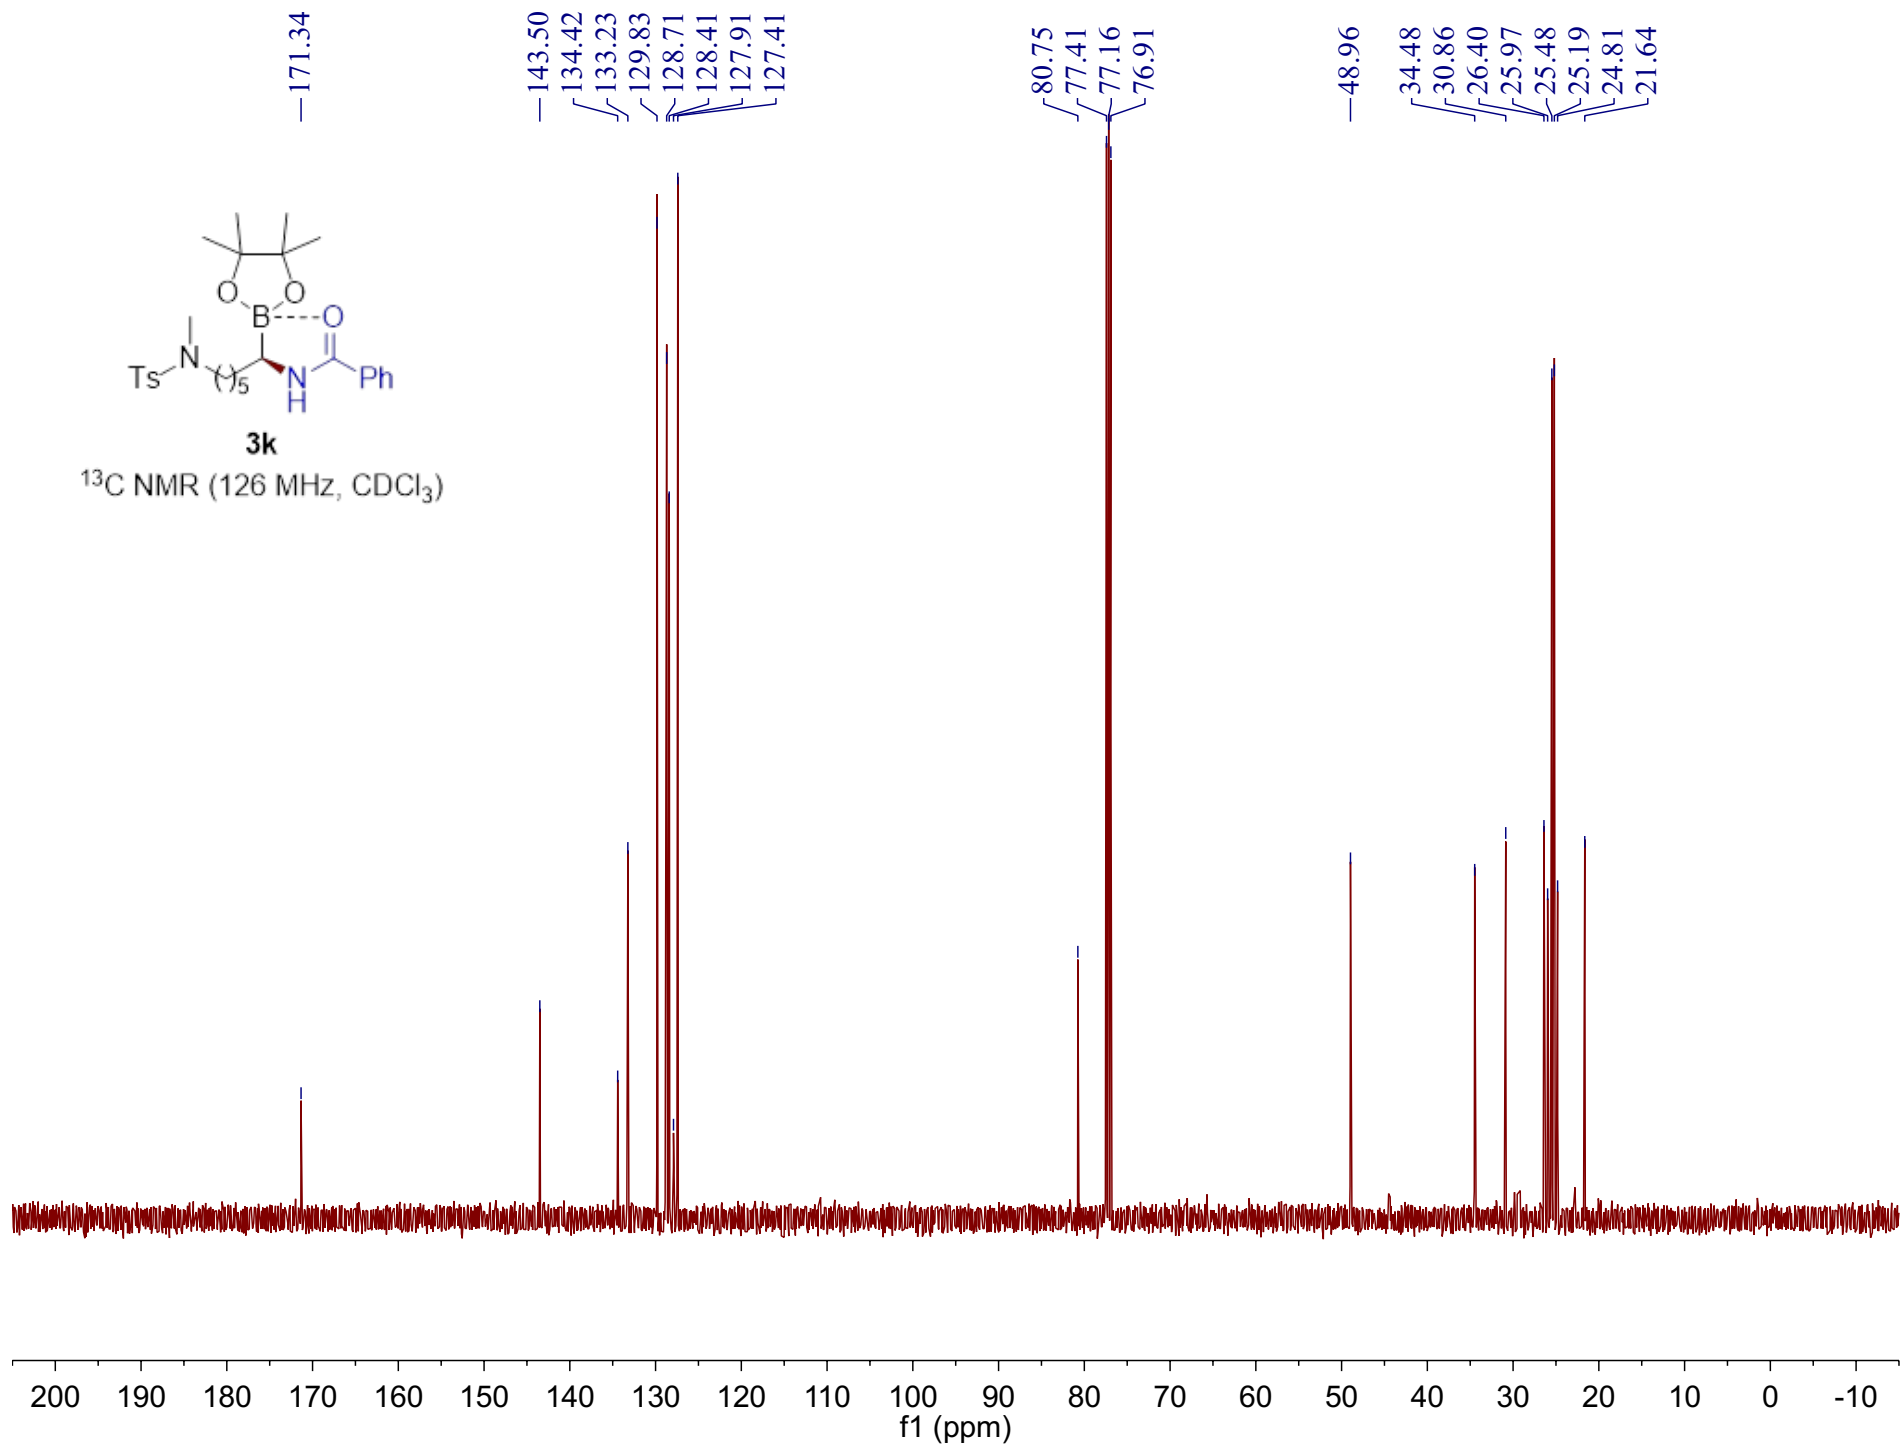

Supplementary Figure 33:  $^{13}\text{C}$  NMR (126 MHz,  $\text{CDCl}_3$ ) spectrum of **3k**.

-17.26

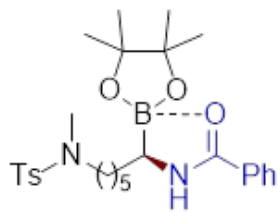

**3k**

$^{11}\text{B}$  NMR (160 MHz,  $\text{CDCl}_3$ )

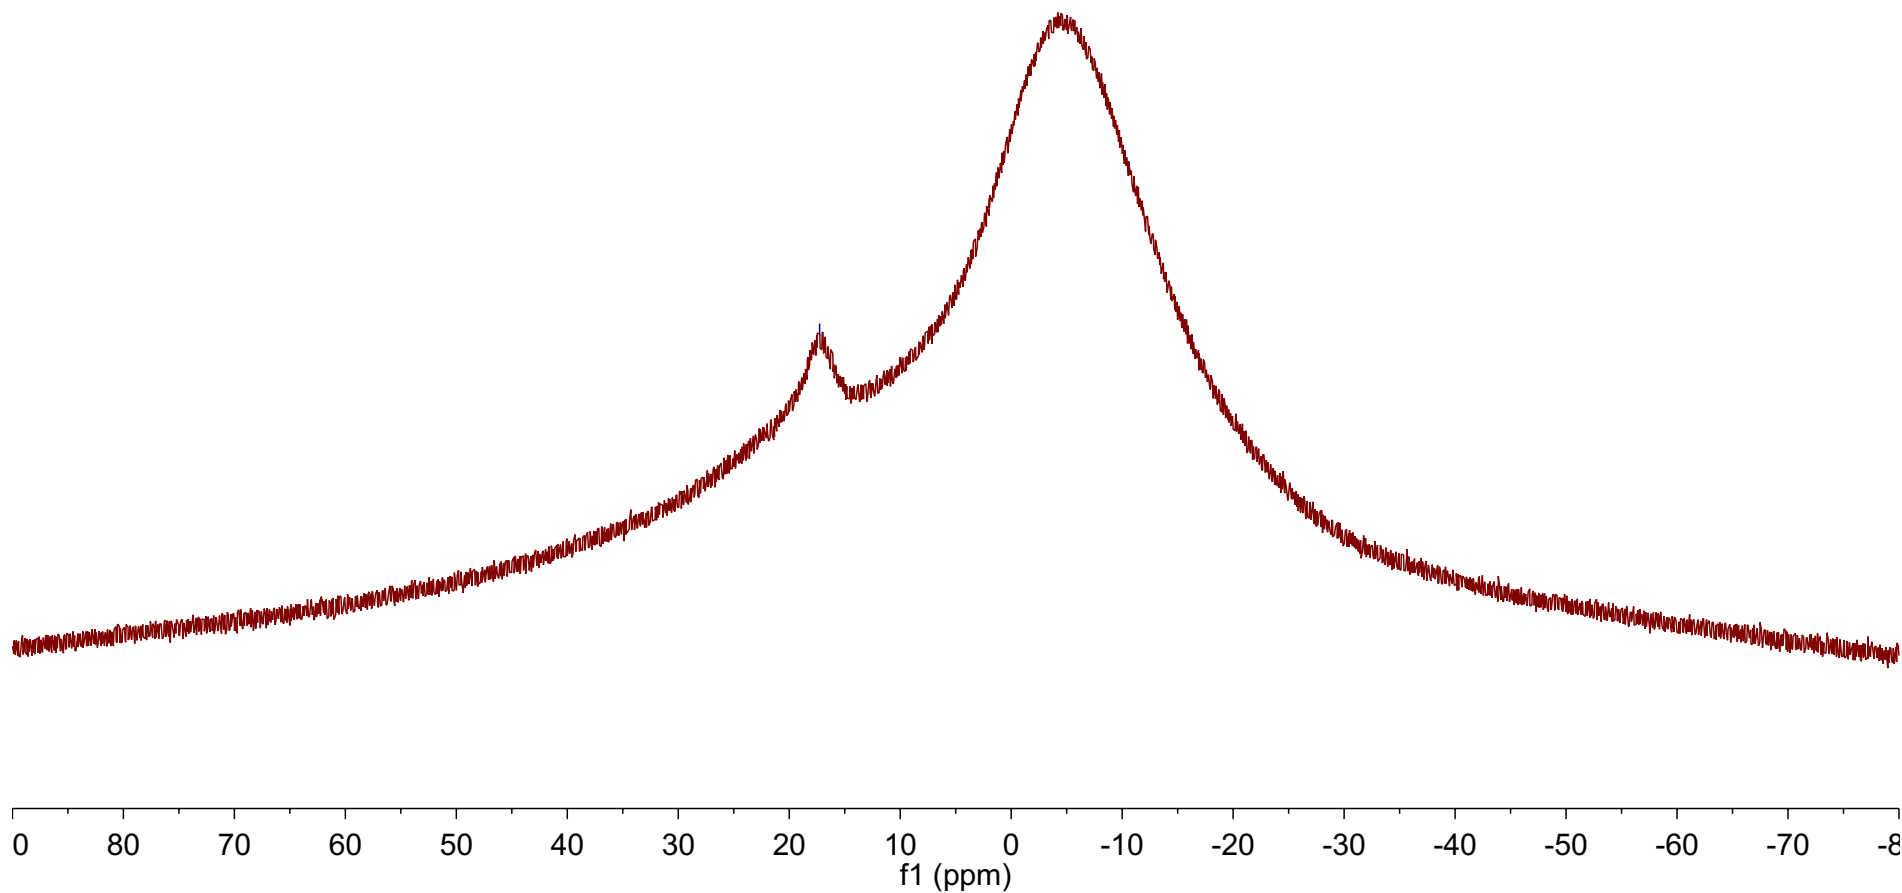

**Supplementary Figure 34:**  $^{11}\text{B}$  NMR (160 MHz,  $\text{CDCl}_3$ ) spectrum of **3k**.

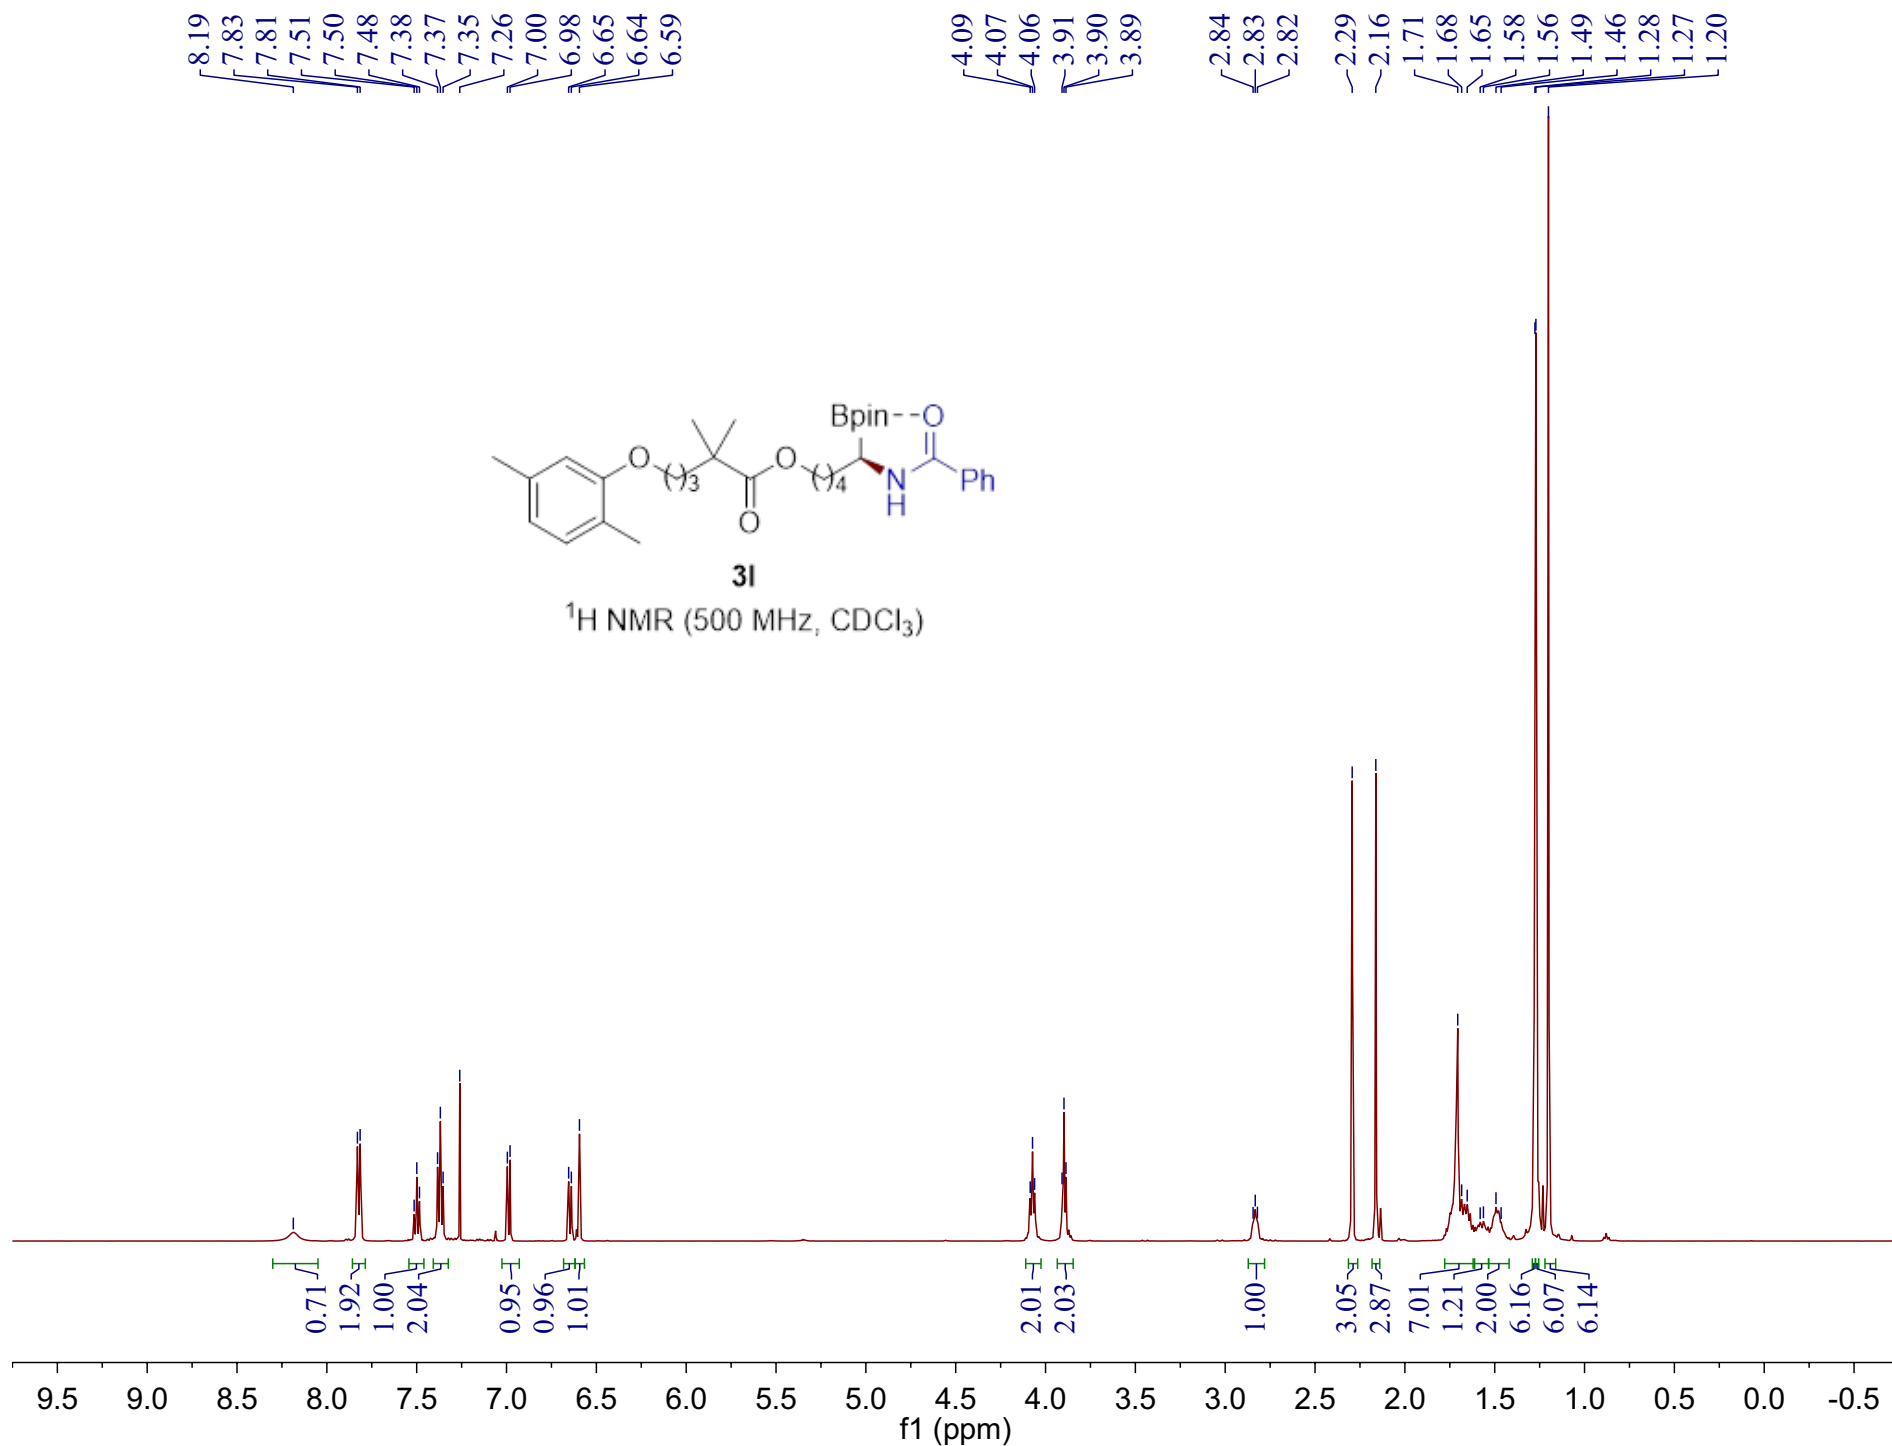

Supplementary Figure 35: <sup>1</sup>H NMR (500 MHz, CDCl<sub>3</sub>) spectrum of **3l**.

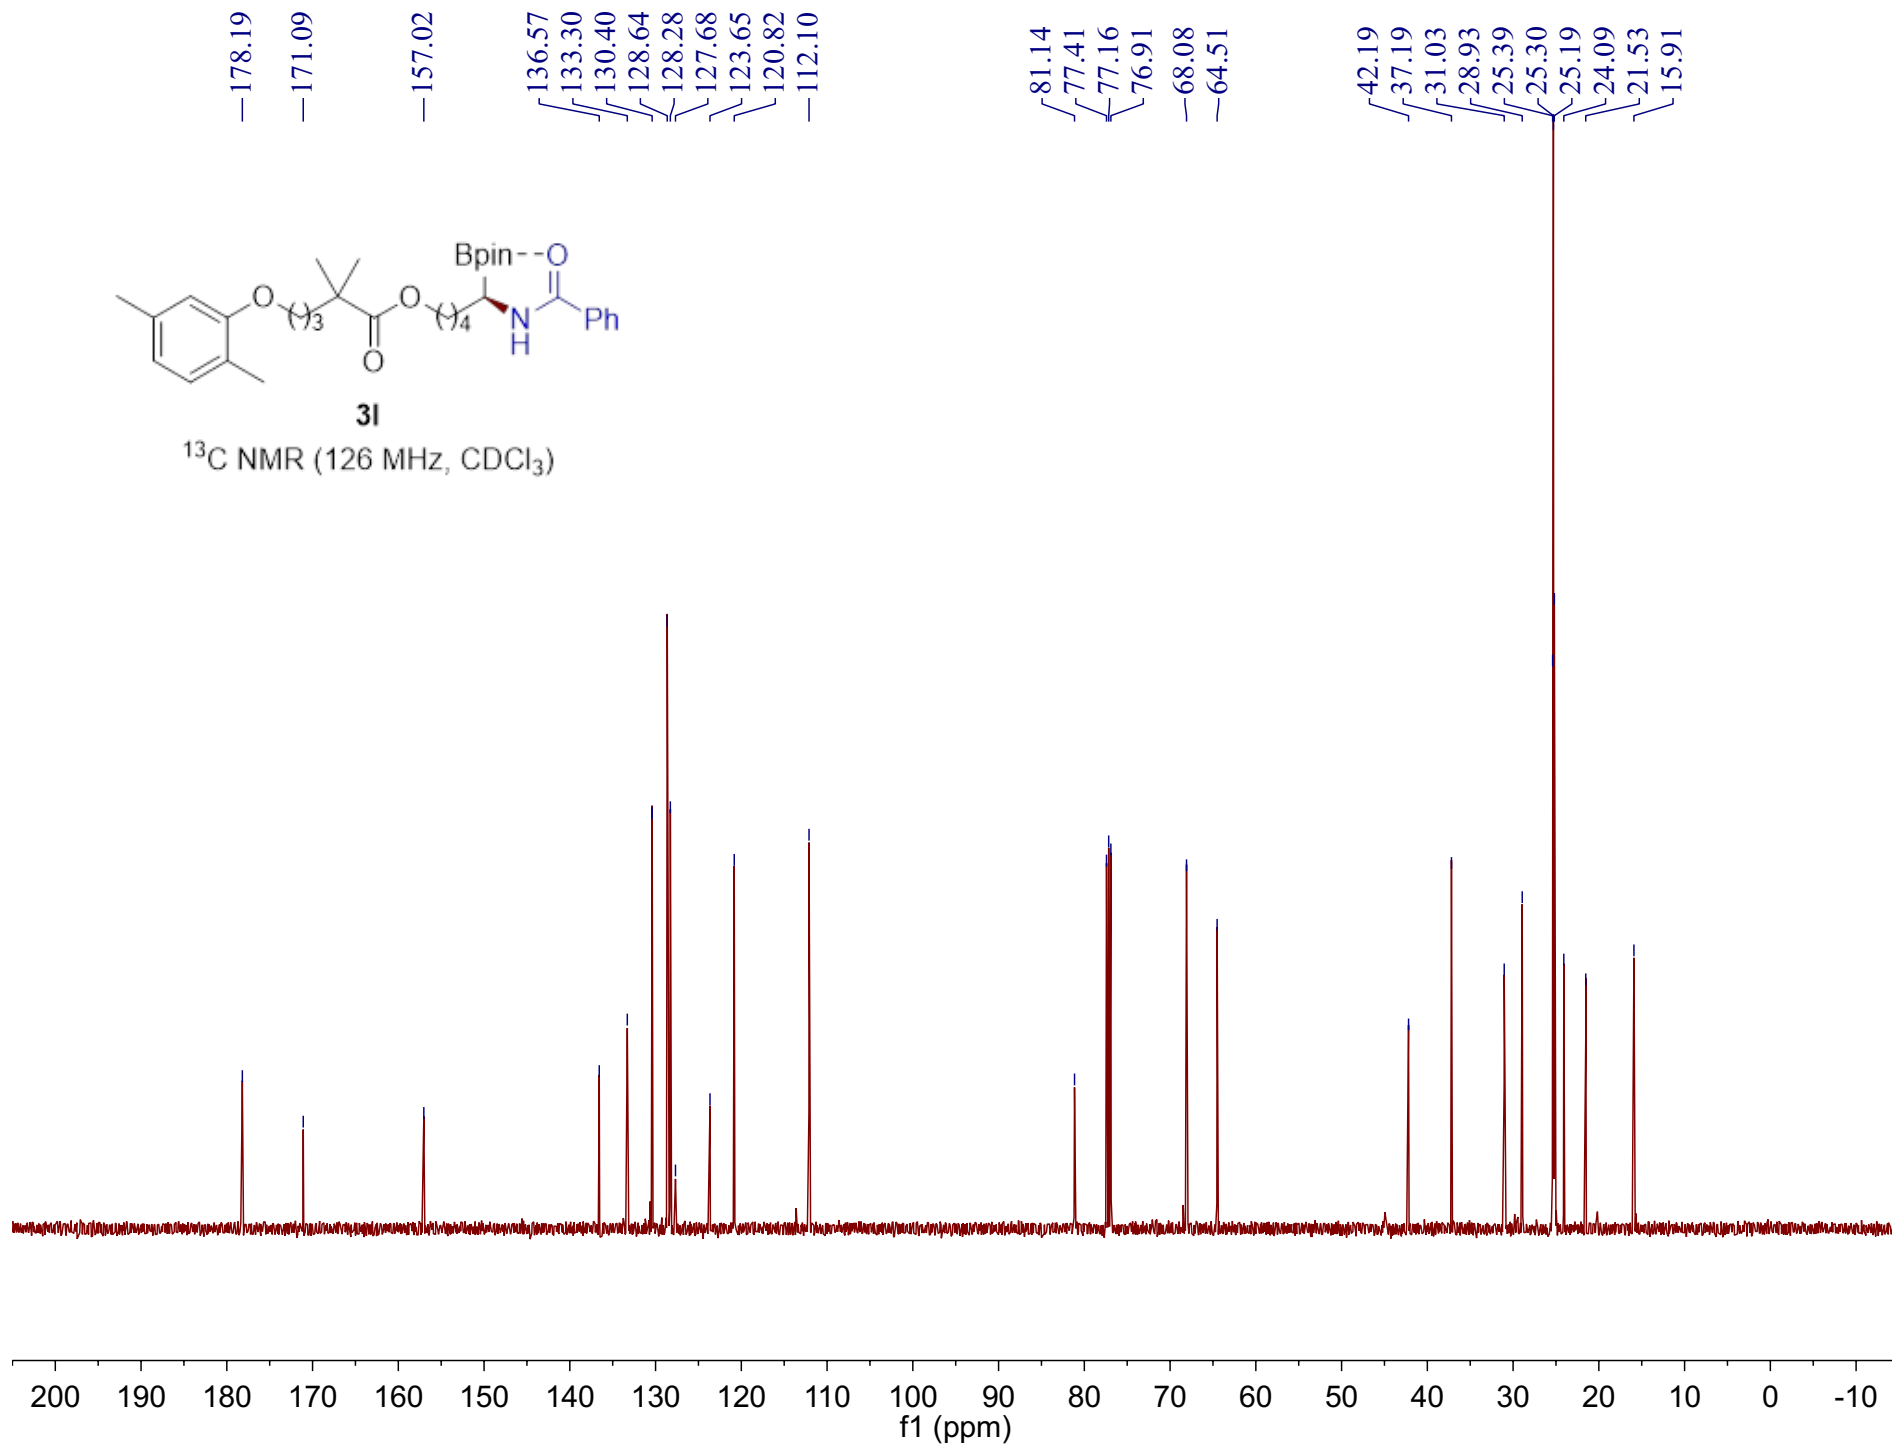

Supplementary Figure 36: <sup>13</sup>C NMR (126 MHz, CDCl<sub>3</sub>) spectrum of **31**.

-17.89

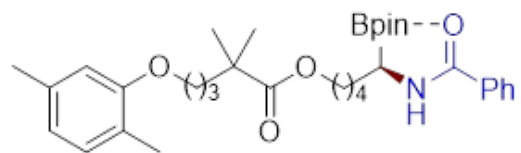

**3I**

$^{11}\text{B}$  NMR (160 MHz,  $\text{CDCl}_3$ )

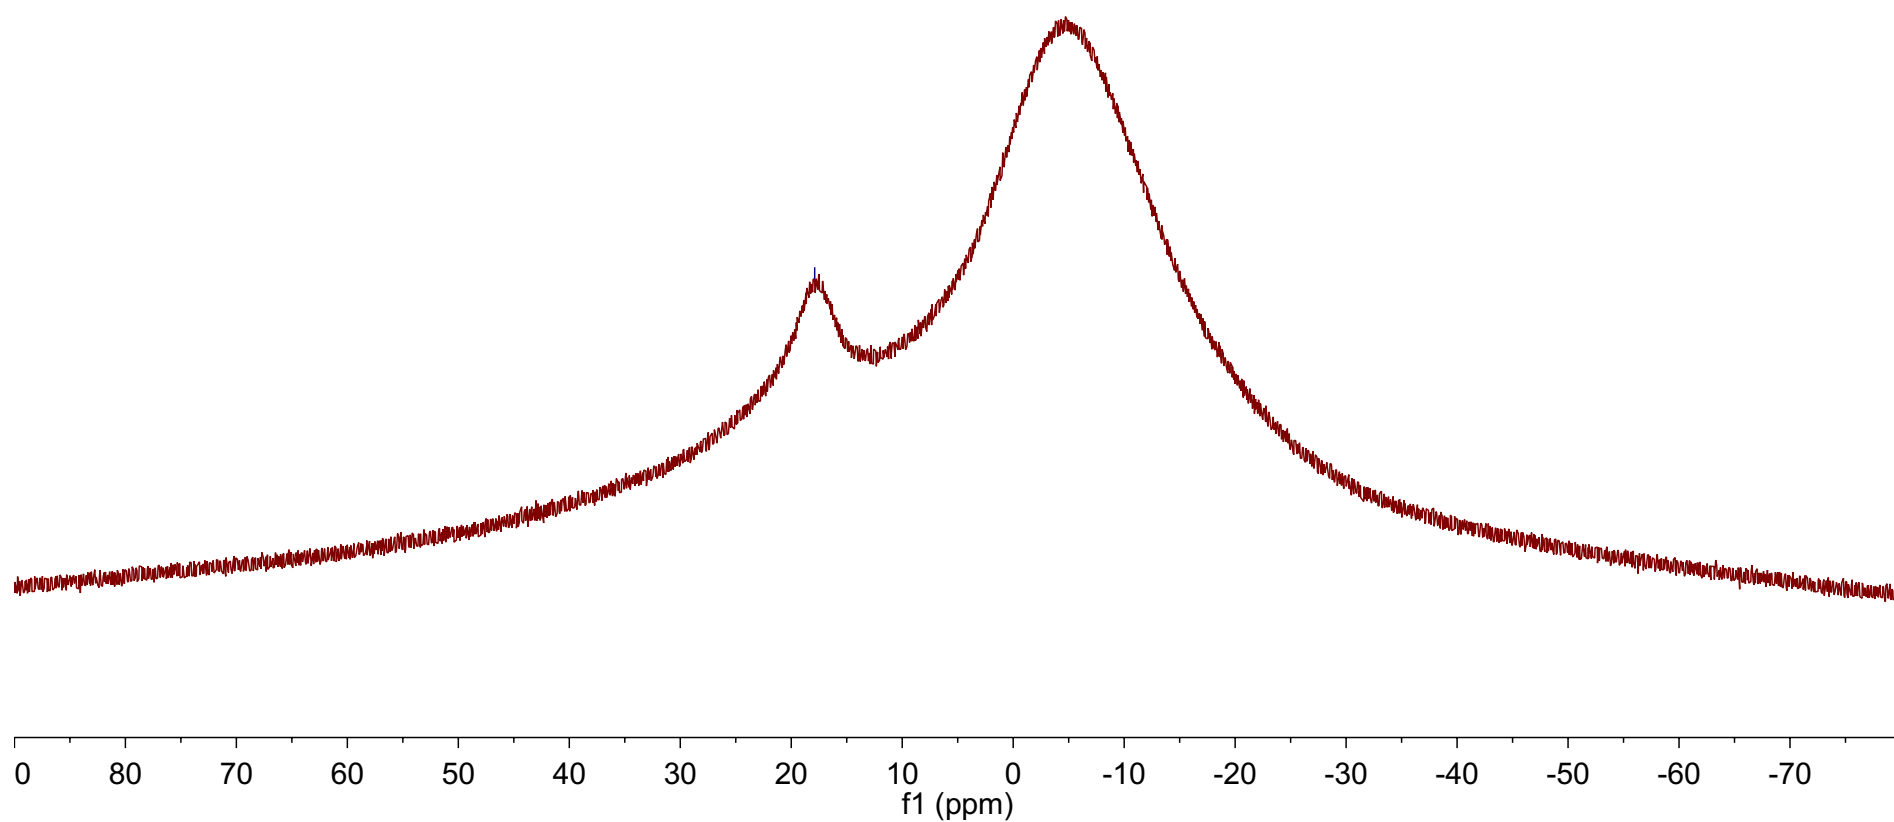

Supplementary Figure 37:  $^{11}\text{B}$  NMR (160 MHz,  $\text{CDCl}_3$ ) spectrum of **3I**.

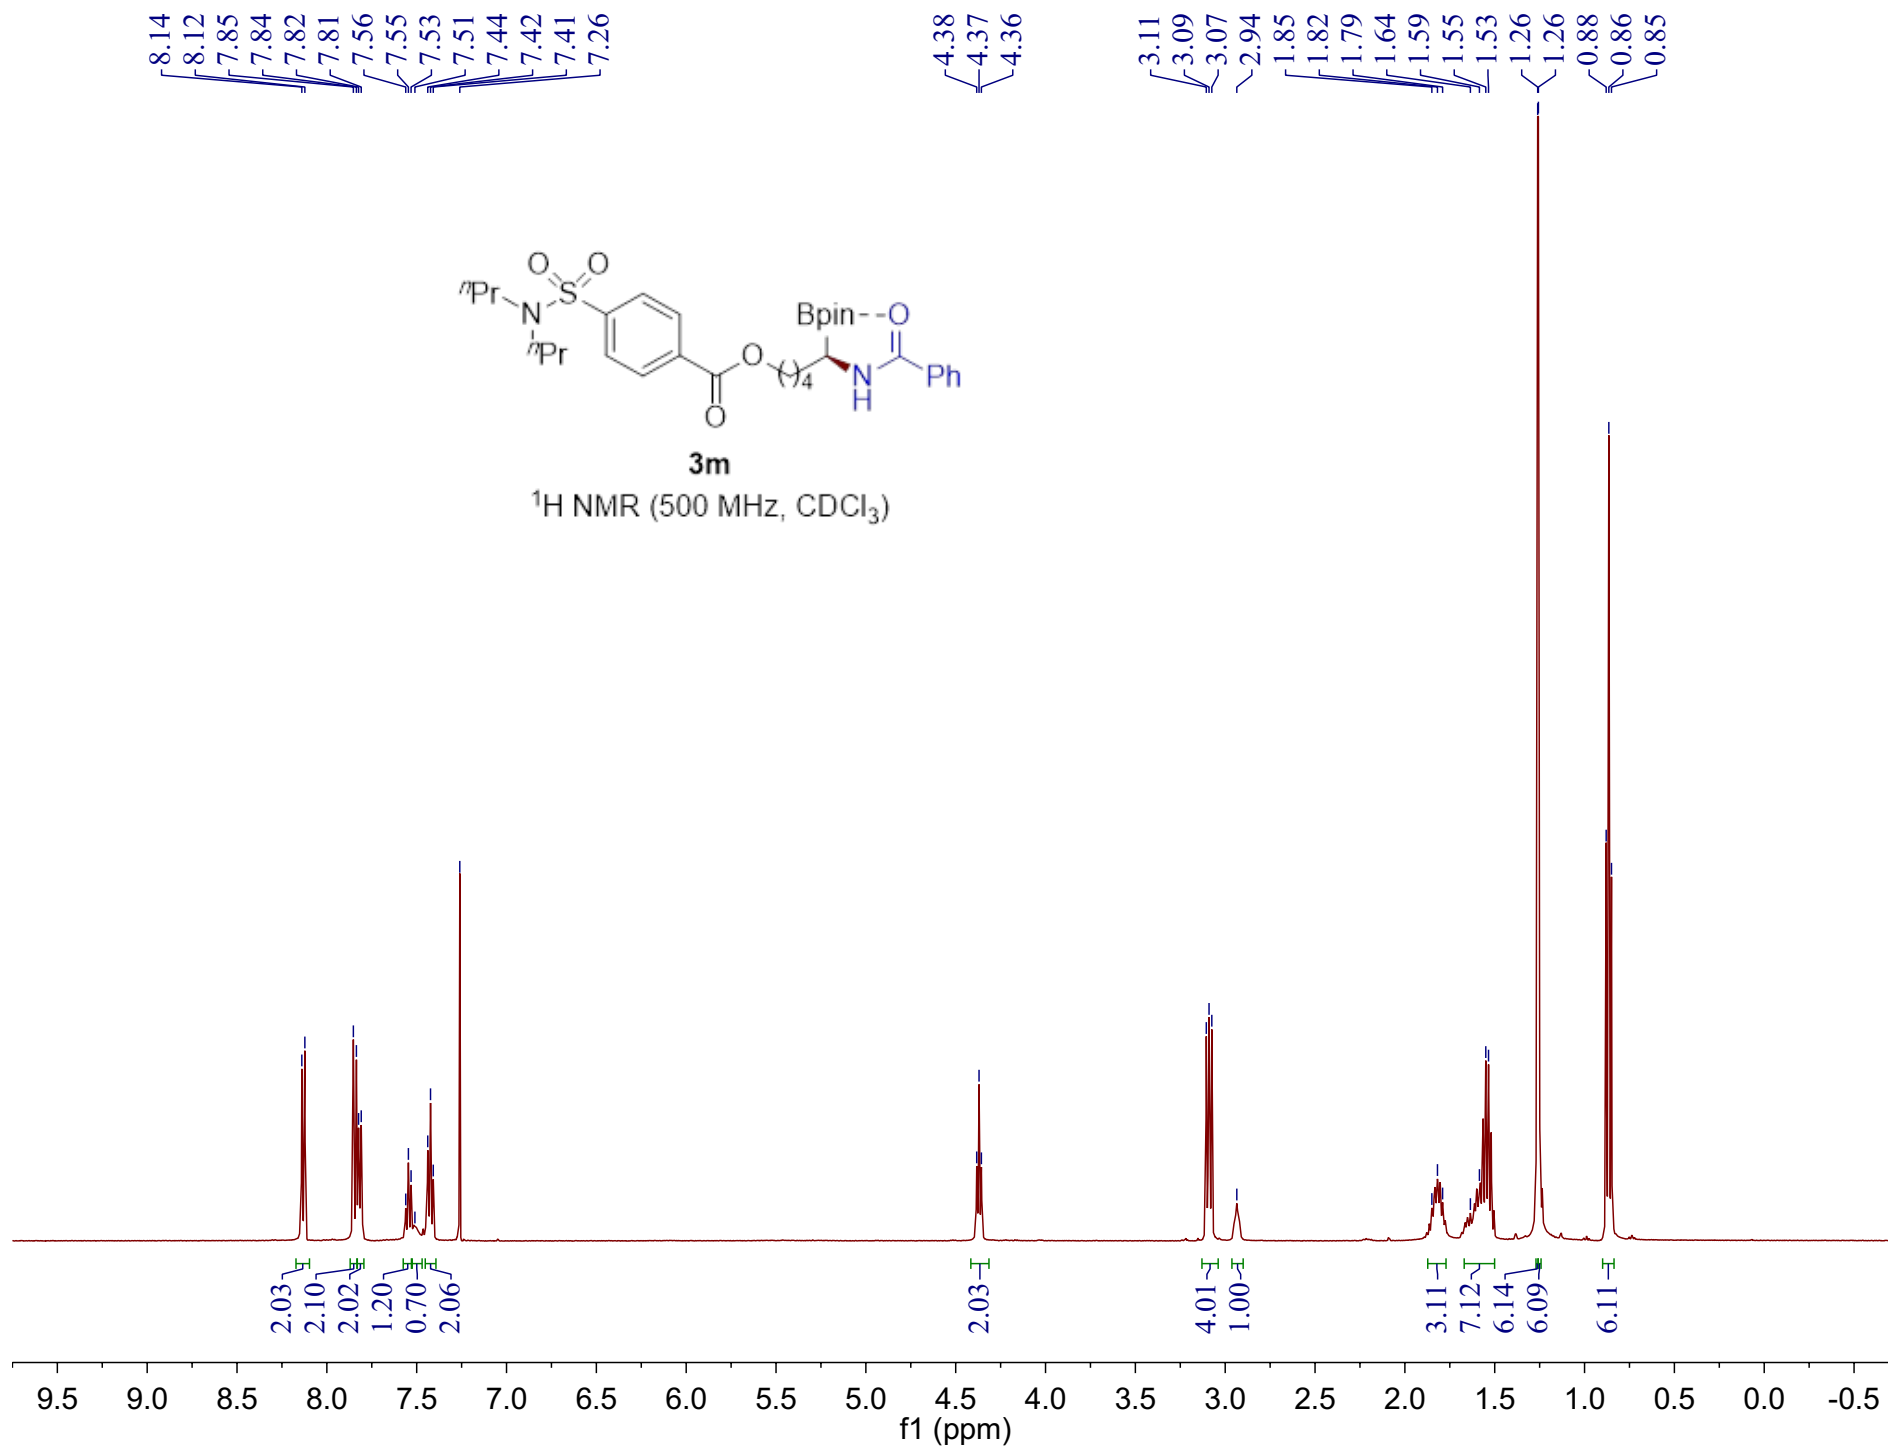

Supplementary Figure 38: <sup>1</sup>H NMR (500 MHz, CDCl<sub>3</sub>) spectrum of **3m**.

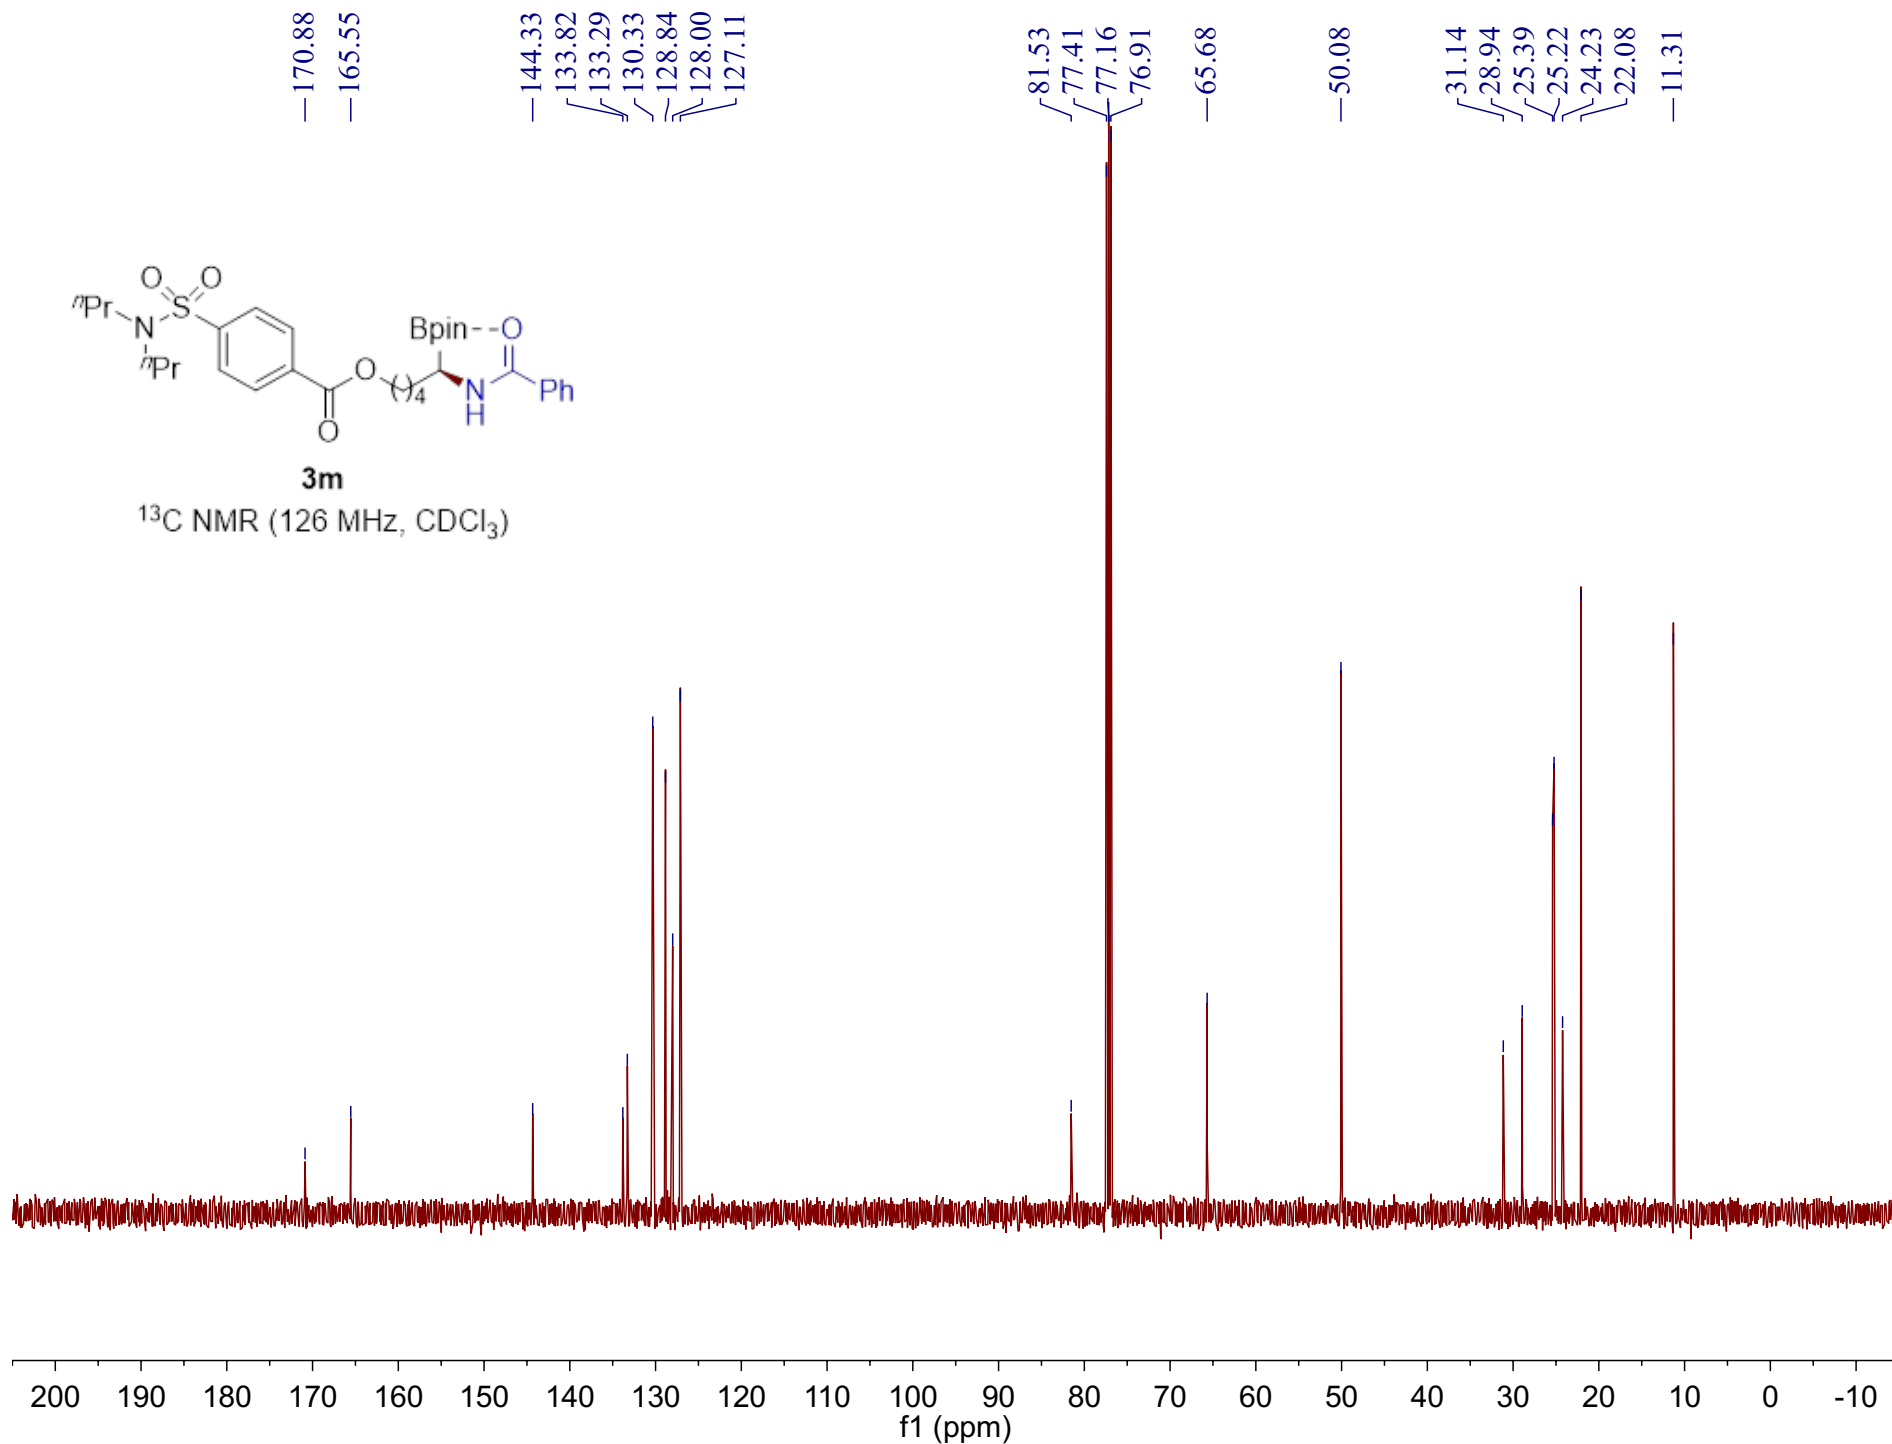

Supplementary Figure 39:  $^{13}\text{C}$  NMR (126 MHz,  $\text{CDCl}_3$ ) spectrum of **3m**.

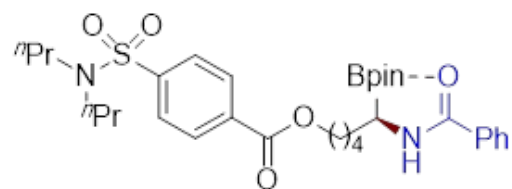

**3m**

$^{11}\text{B}$  NMR (160 MHz,  $\text{CDCl}_3$ )

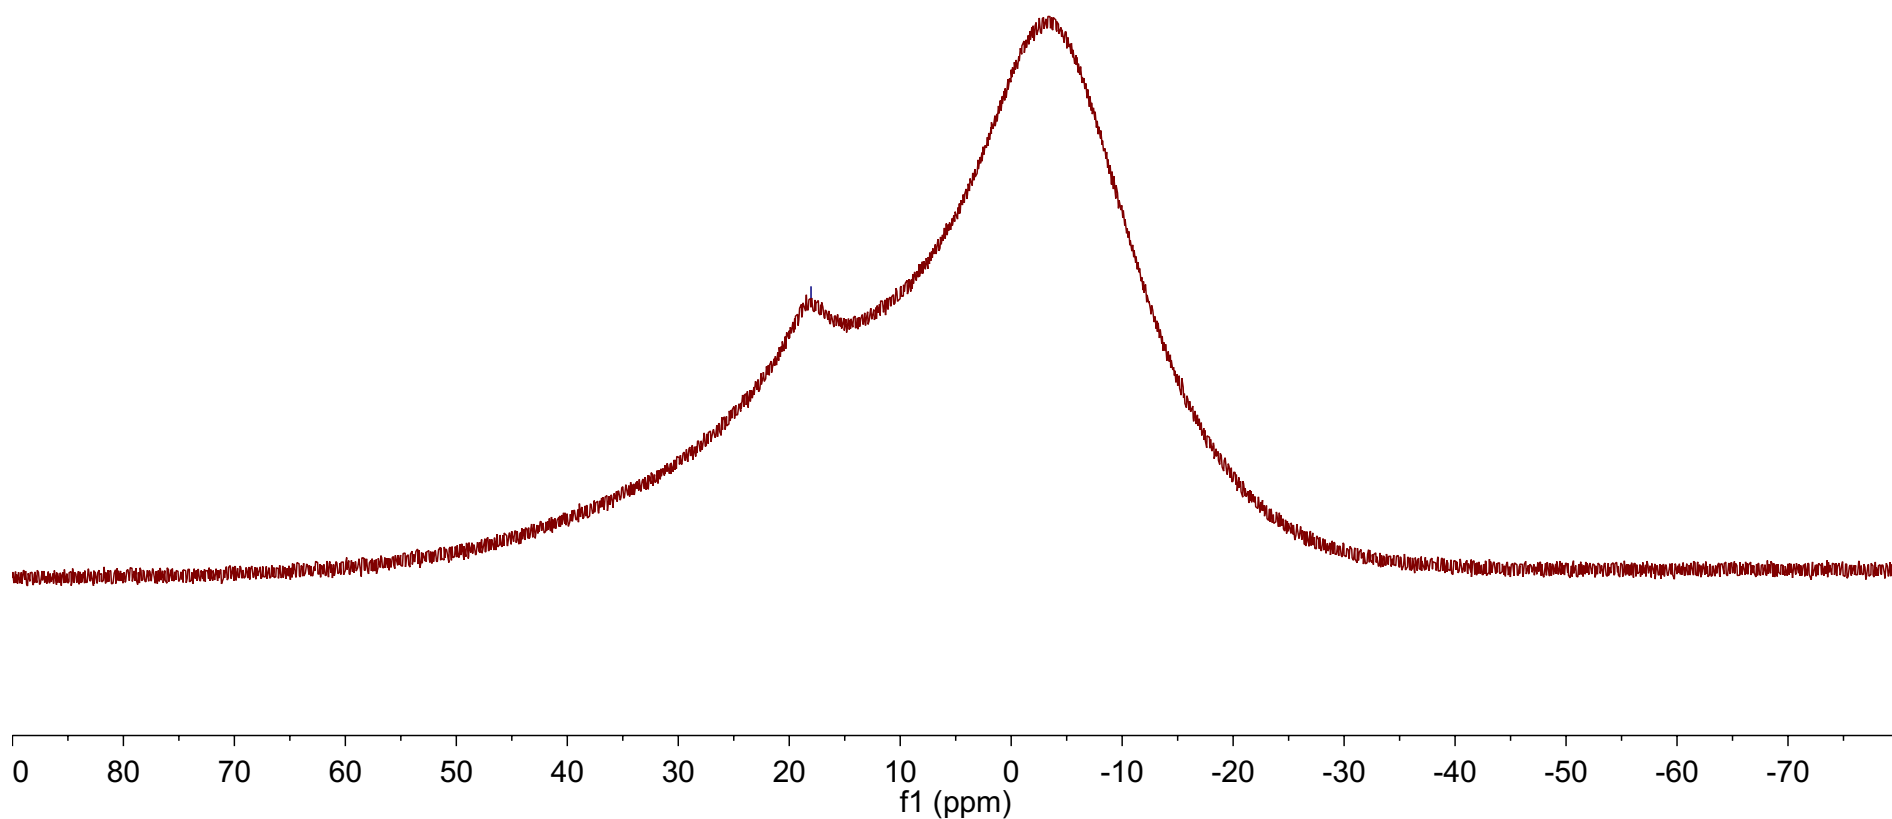

**Supplementary Figure 40:**  $^{11}\text{B}$  NMR (160 MHz,  $\text{CDCl}_3$ ) spectrum of **3m**.



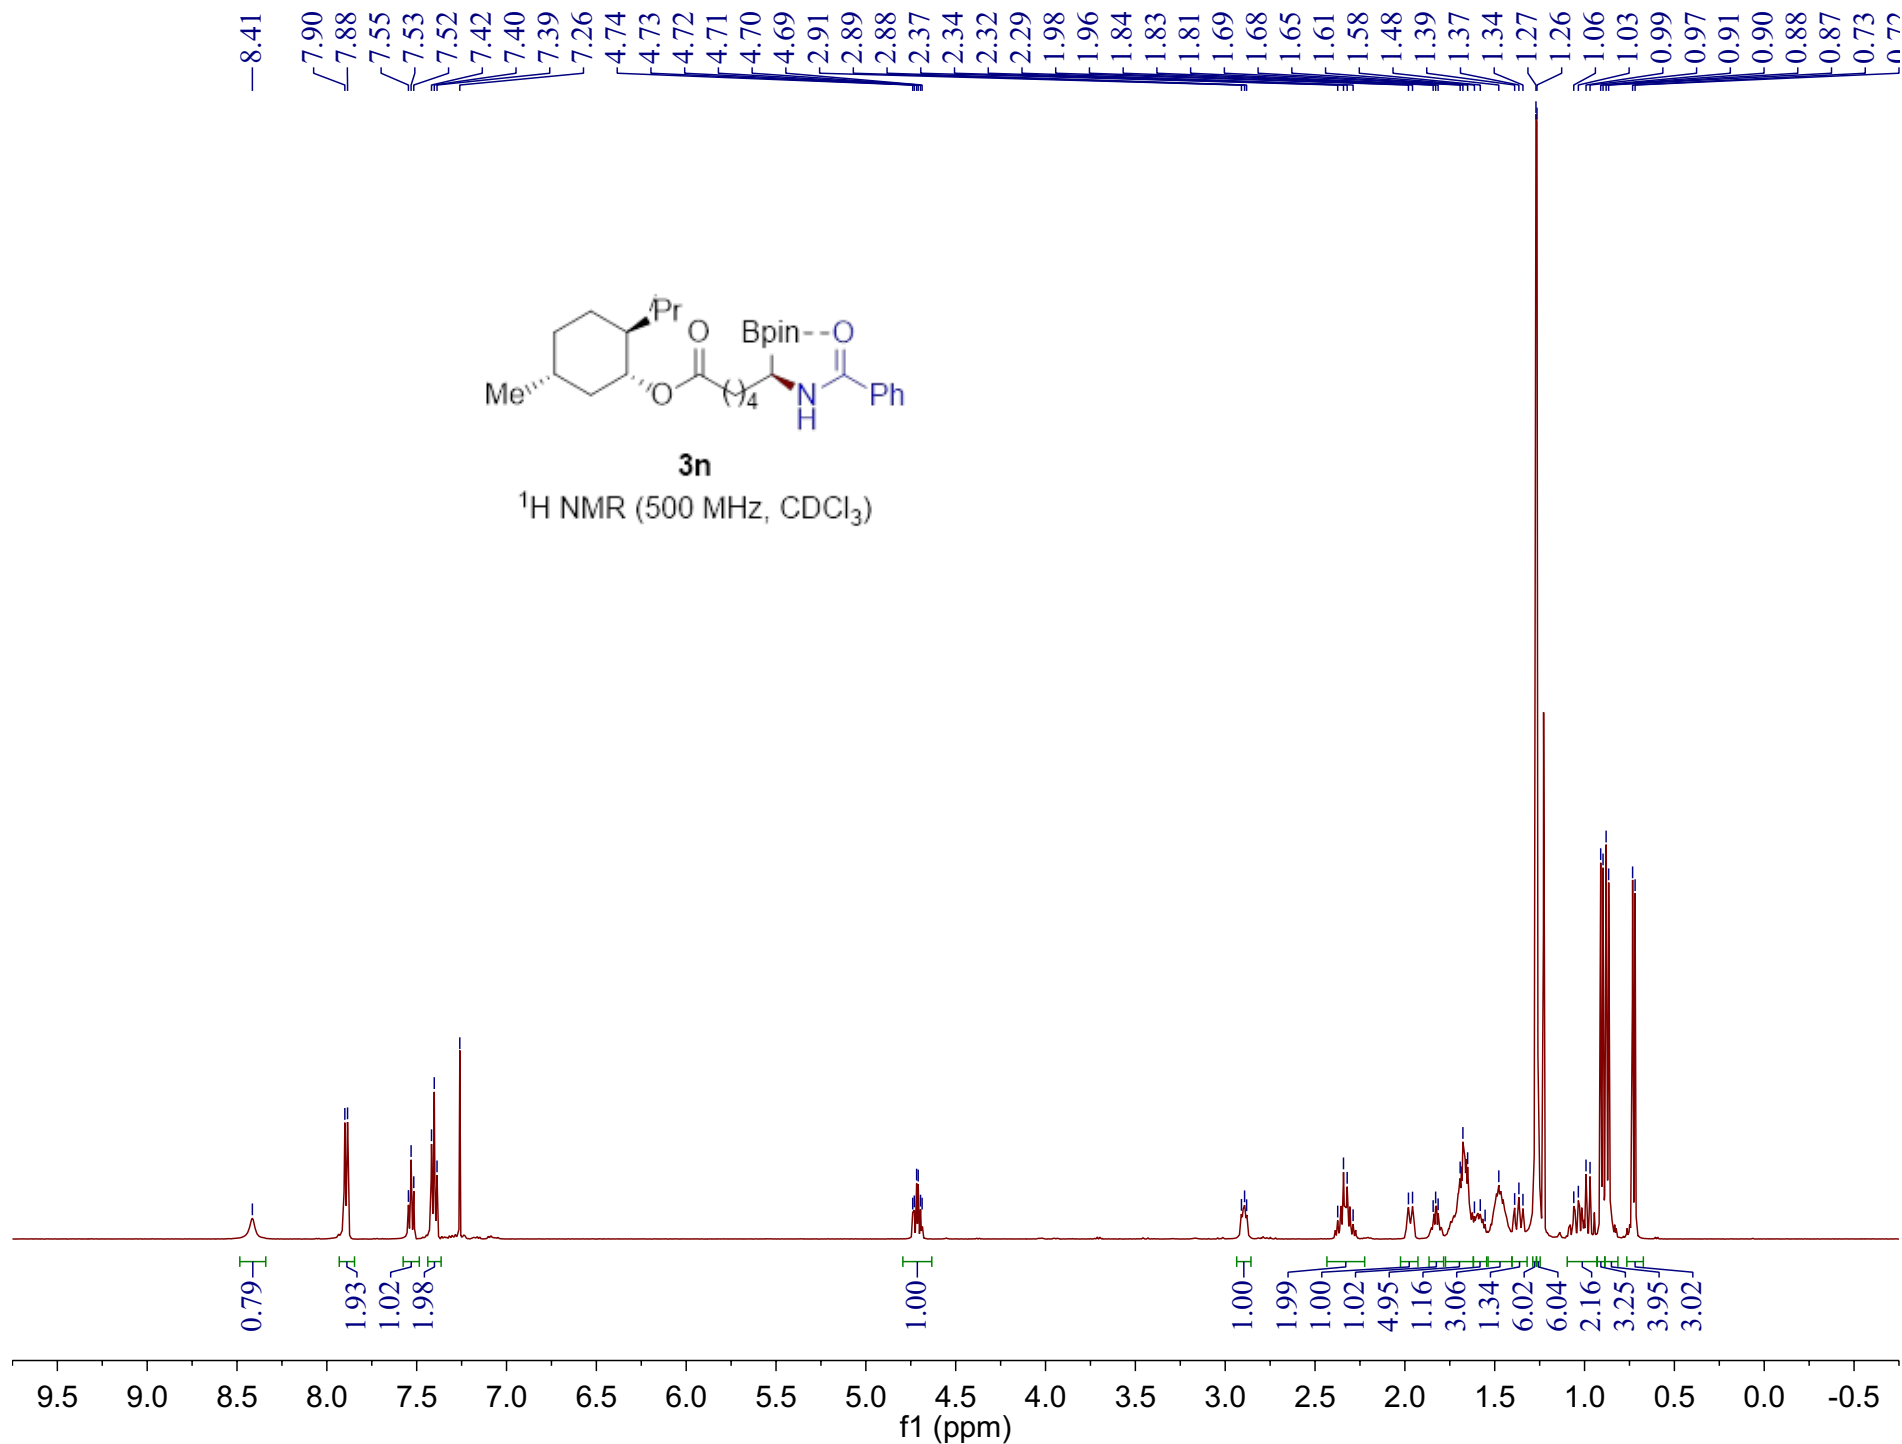

Supplementary Figure 41: <sup>1</sup>H NMR (500 MHz, CDCl<sub>3</sub>) spectrum of **3n**.

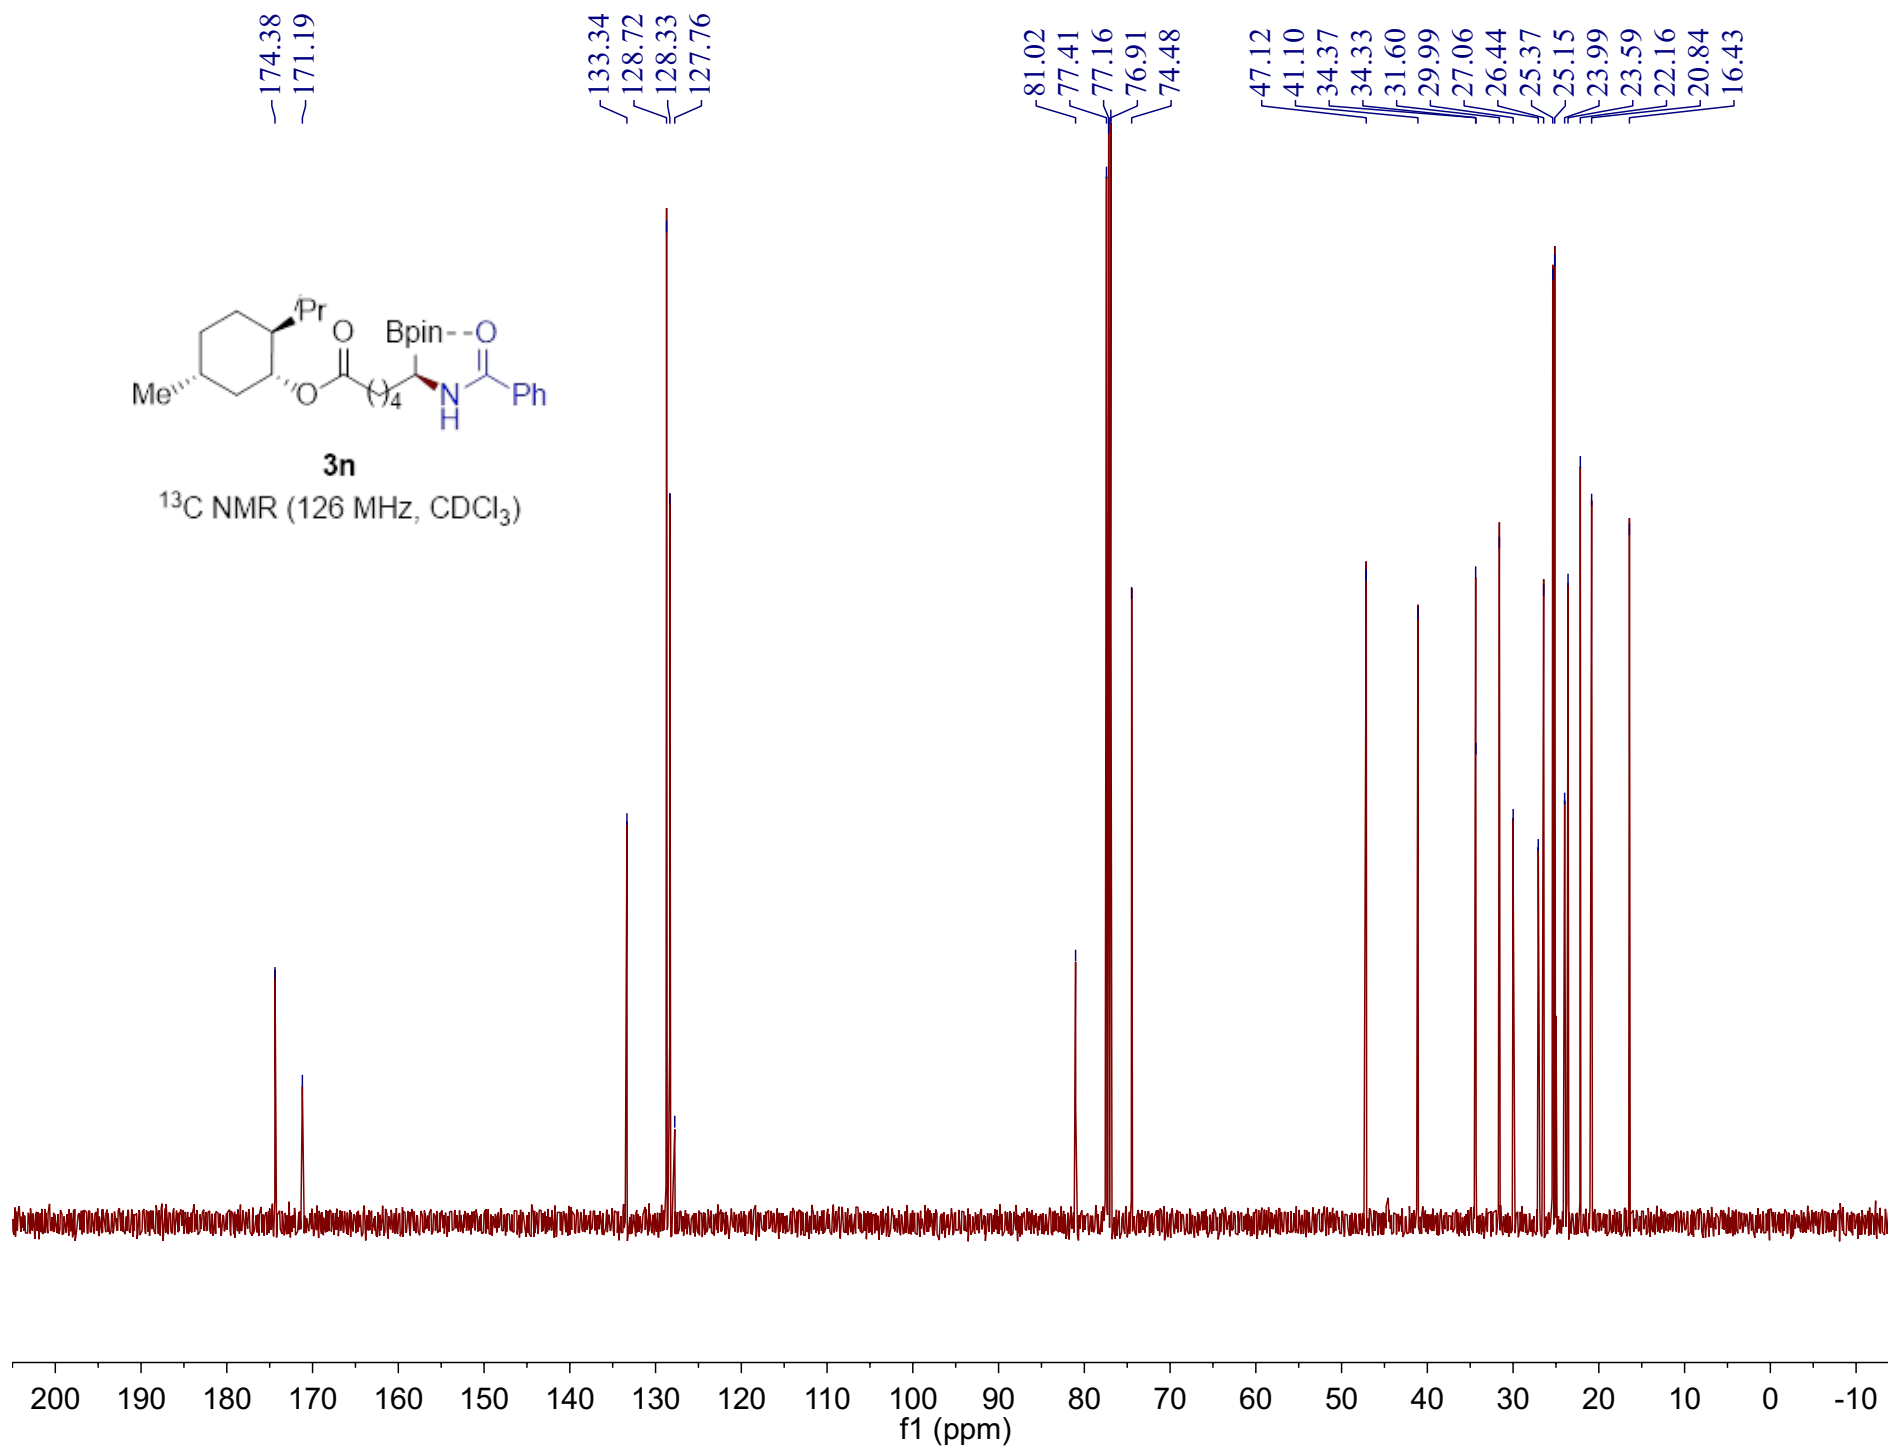

Supplementary Figure 42: <sup>13</sup>C NMR (126 MHz, CDCl<sub>3</sub>) spectrum of **3n**.

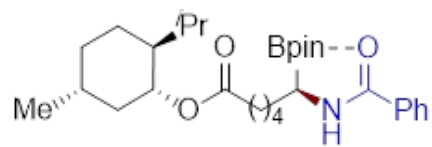

**3n**

$^{11}\text{B}$  NMR (160 MHz,  $\text{CDCl}_3$ )

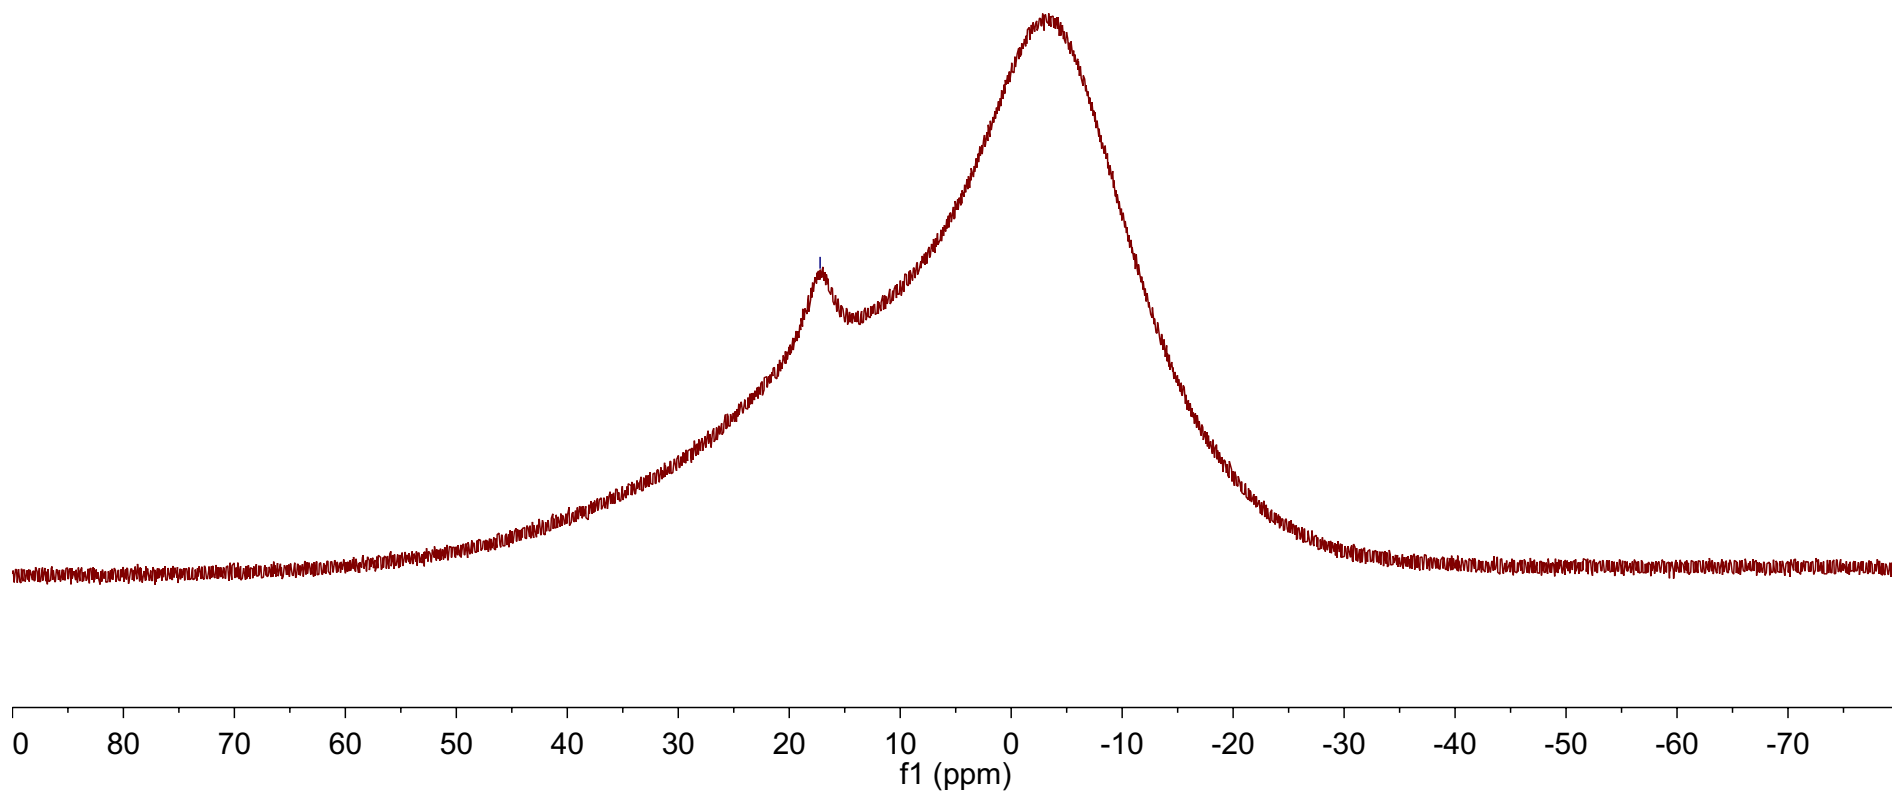

**Supplementary Figure 43:**  $^{11}\text{B}$  NMR (160 MHz,  $\text{CDCl}_3$ ) spectrum of **3n**.

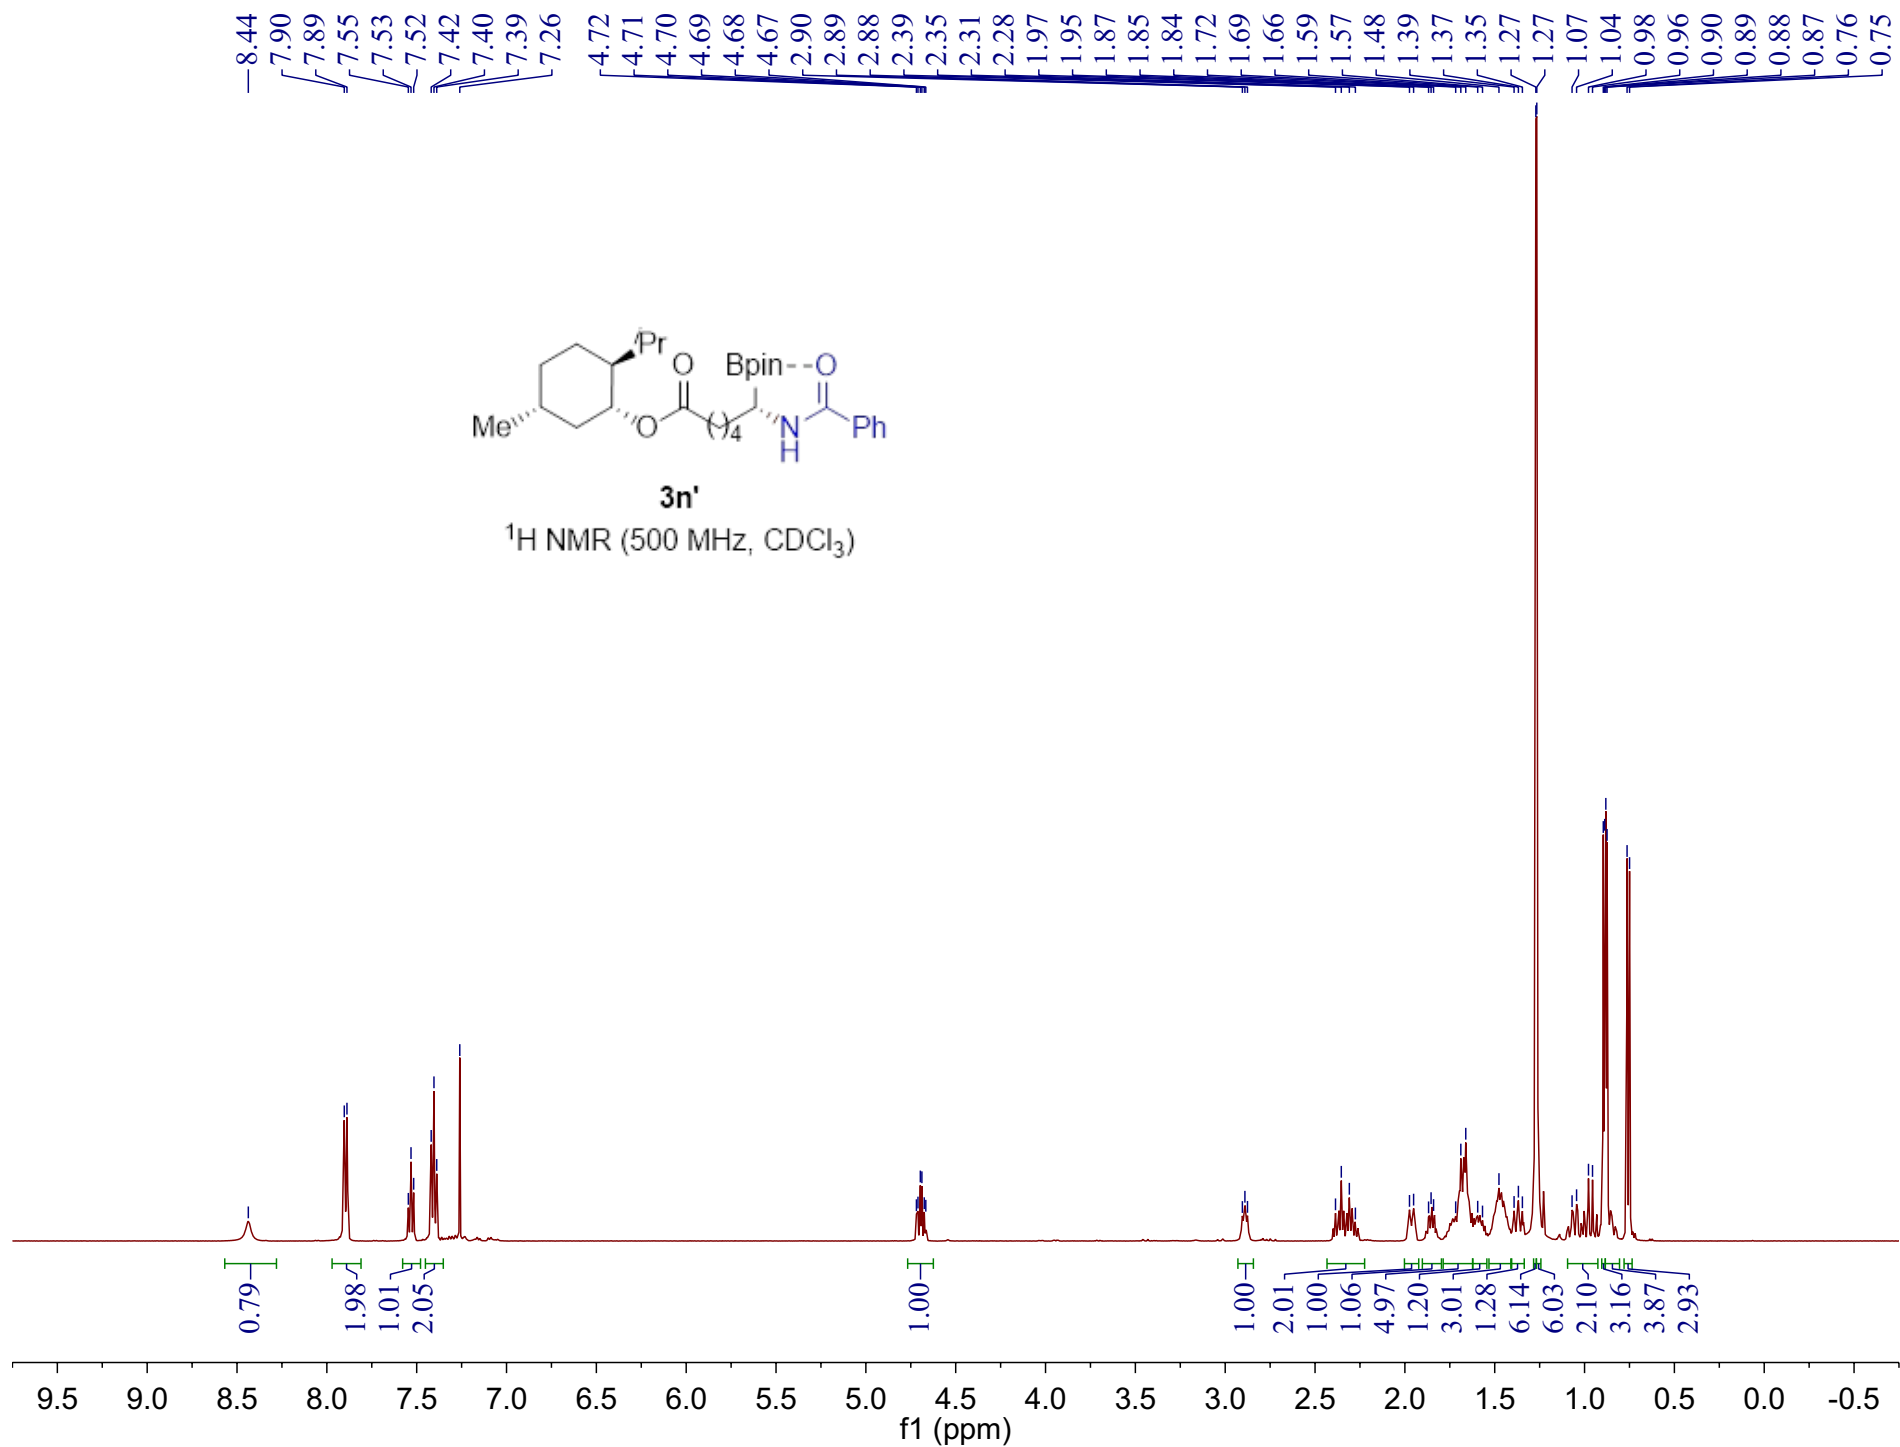

Supplementary Figure 44: <sup>1</sup>H NMR (500 MHz, CDCl<sub>3</sub>) spectrum of **3n'**.

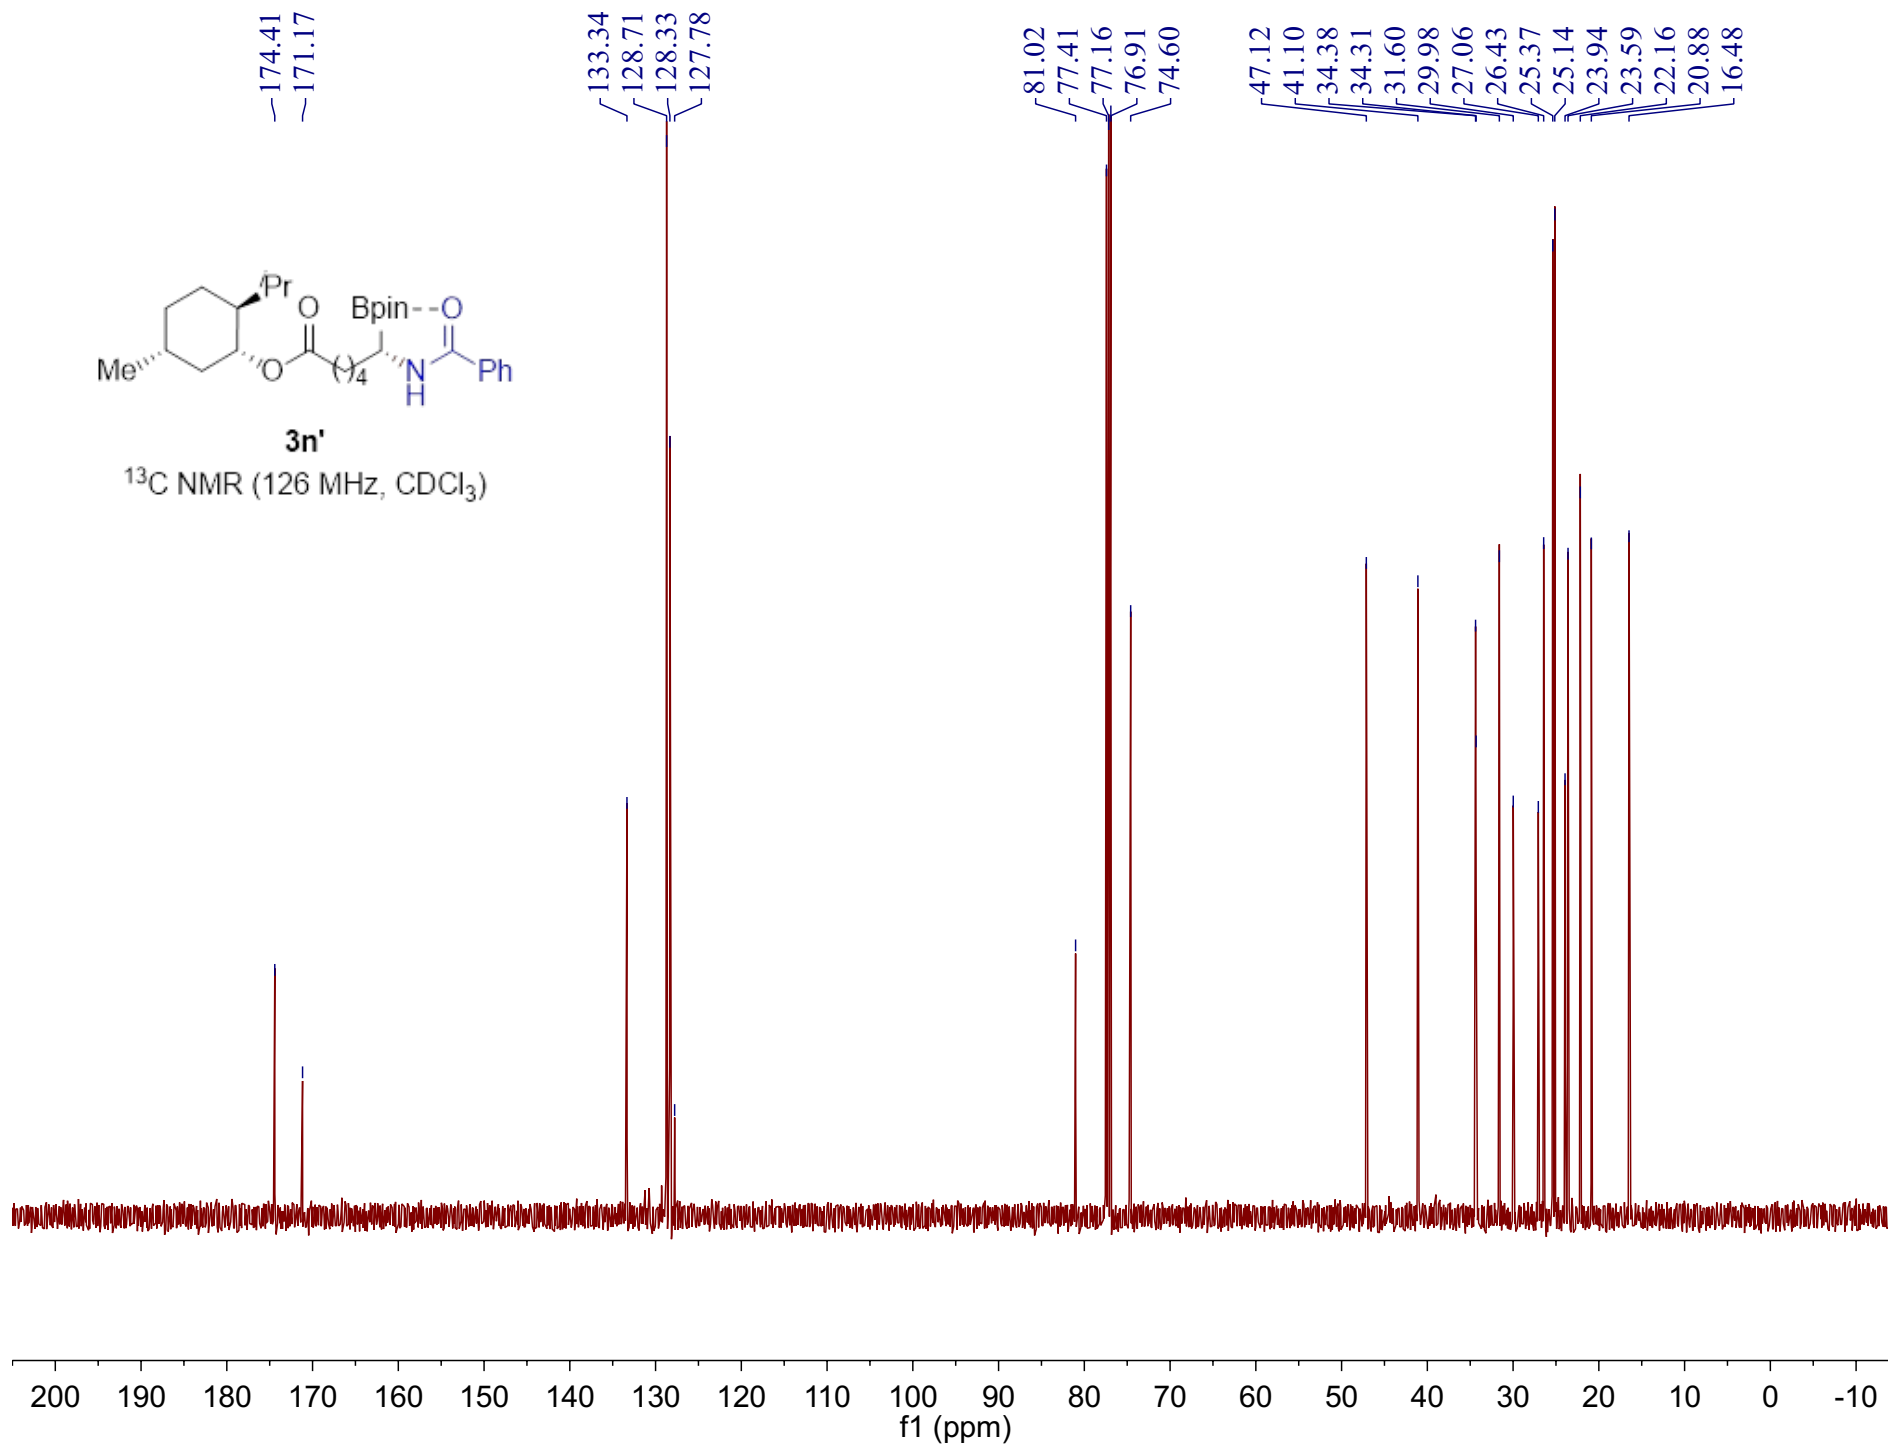

Supplementary Figure 45: <sup>13</sup>C NMR (126 MHz, CDCl<sub>3</sub>) spectrum of **3n'**.

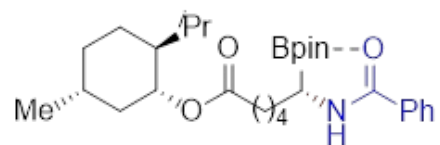

**3n'**

$^{11}\text{B}$  NMR (160 MHz,  $\text{CDCl}_3$ )

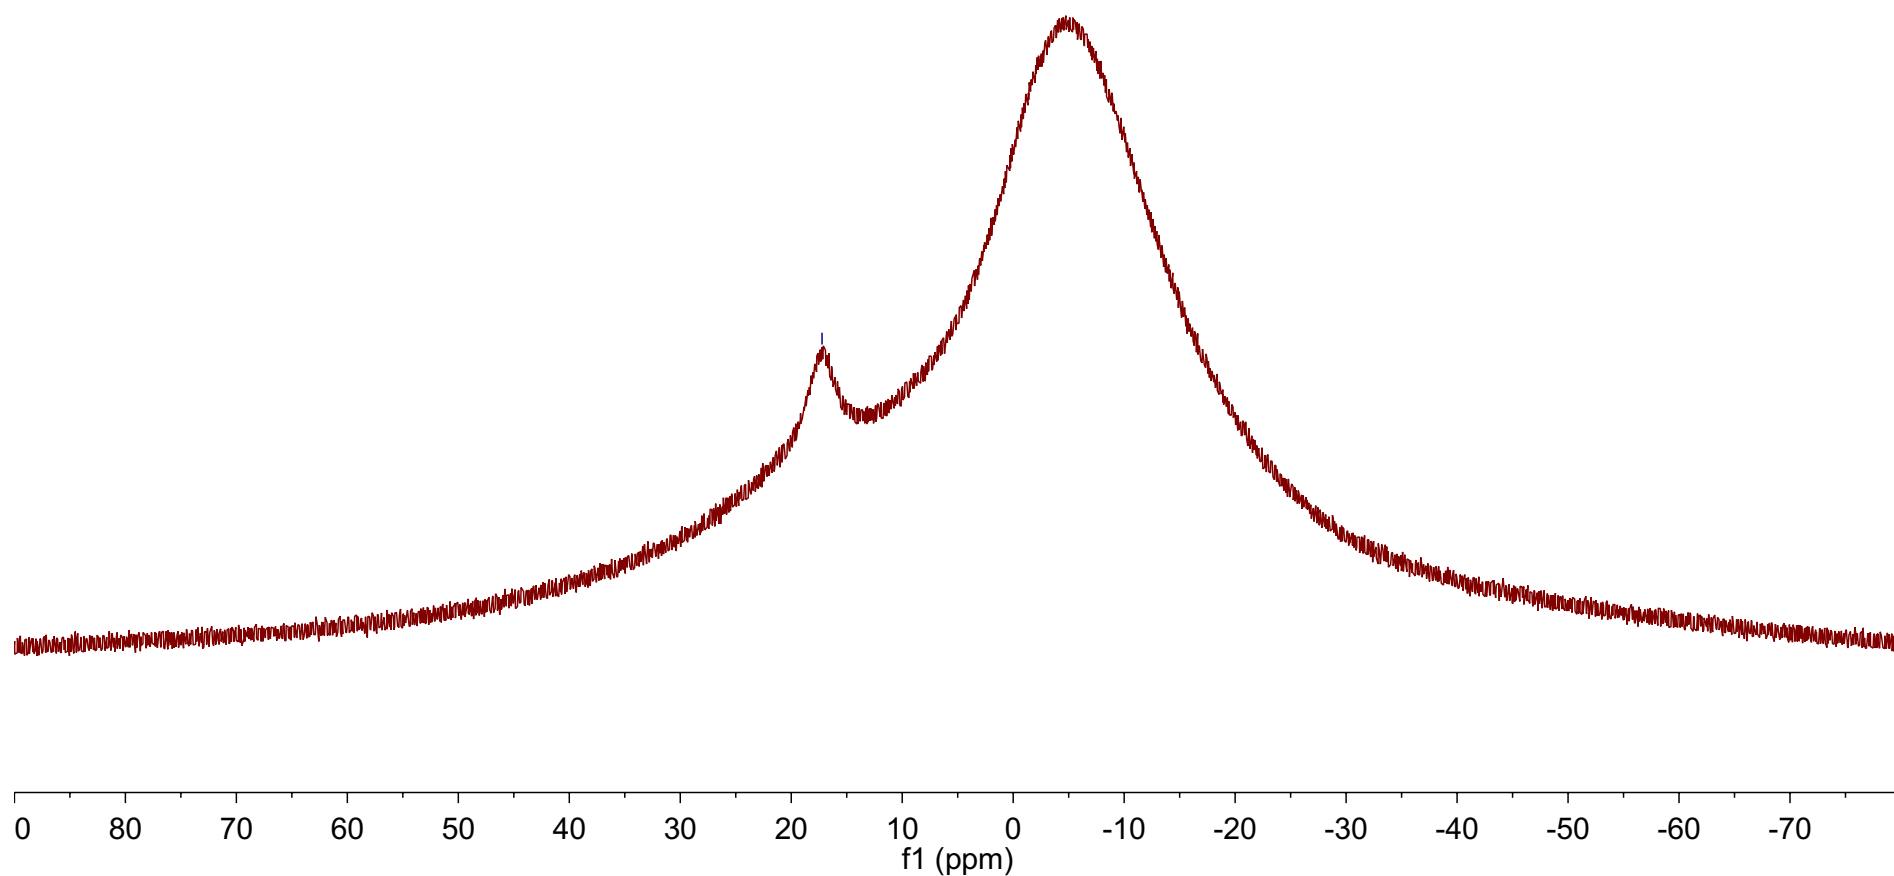

**Supplementary Figure 46:**  $^{11}\text{B}$  NMR (160 MHz,  $\text{CDCl}_3$ ) spectrum of **3n'**.

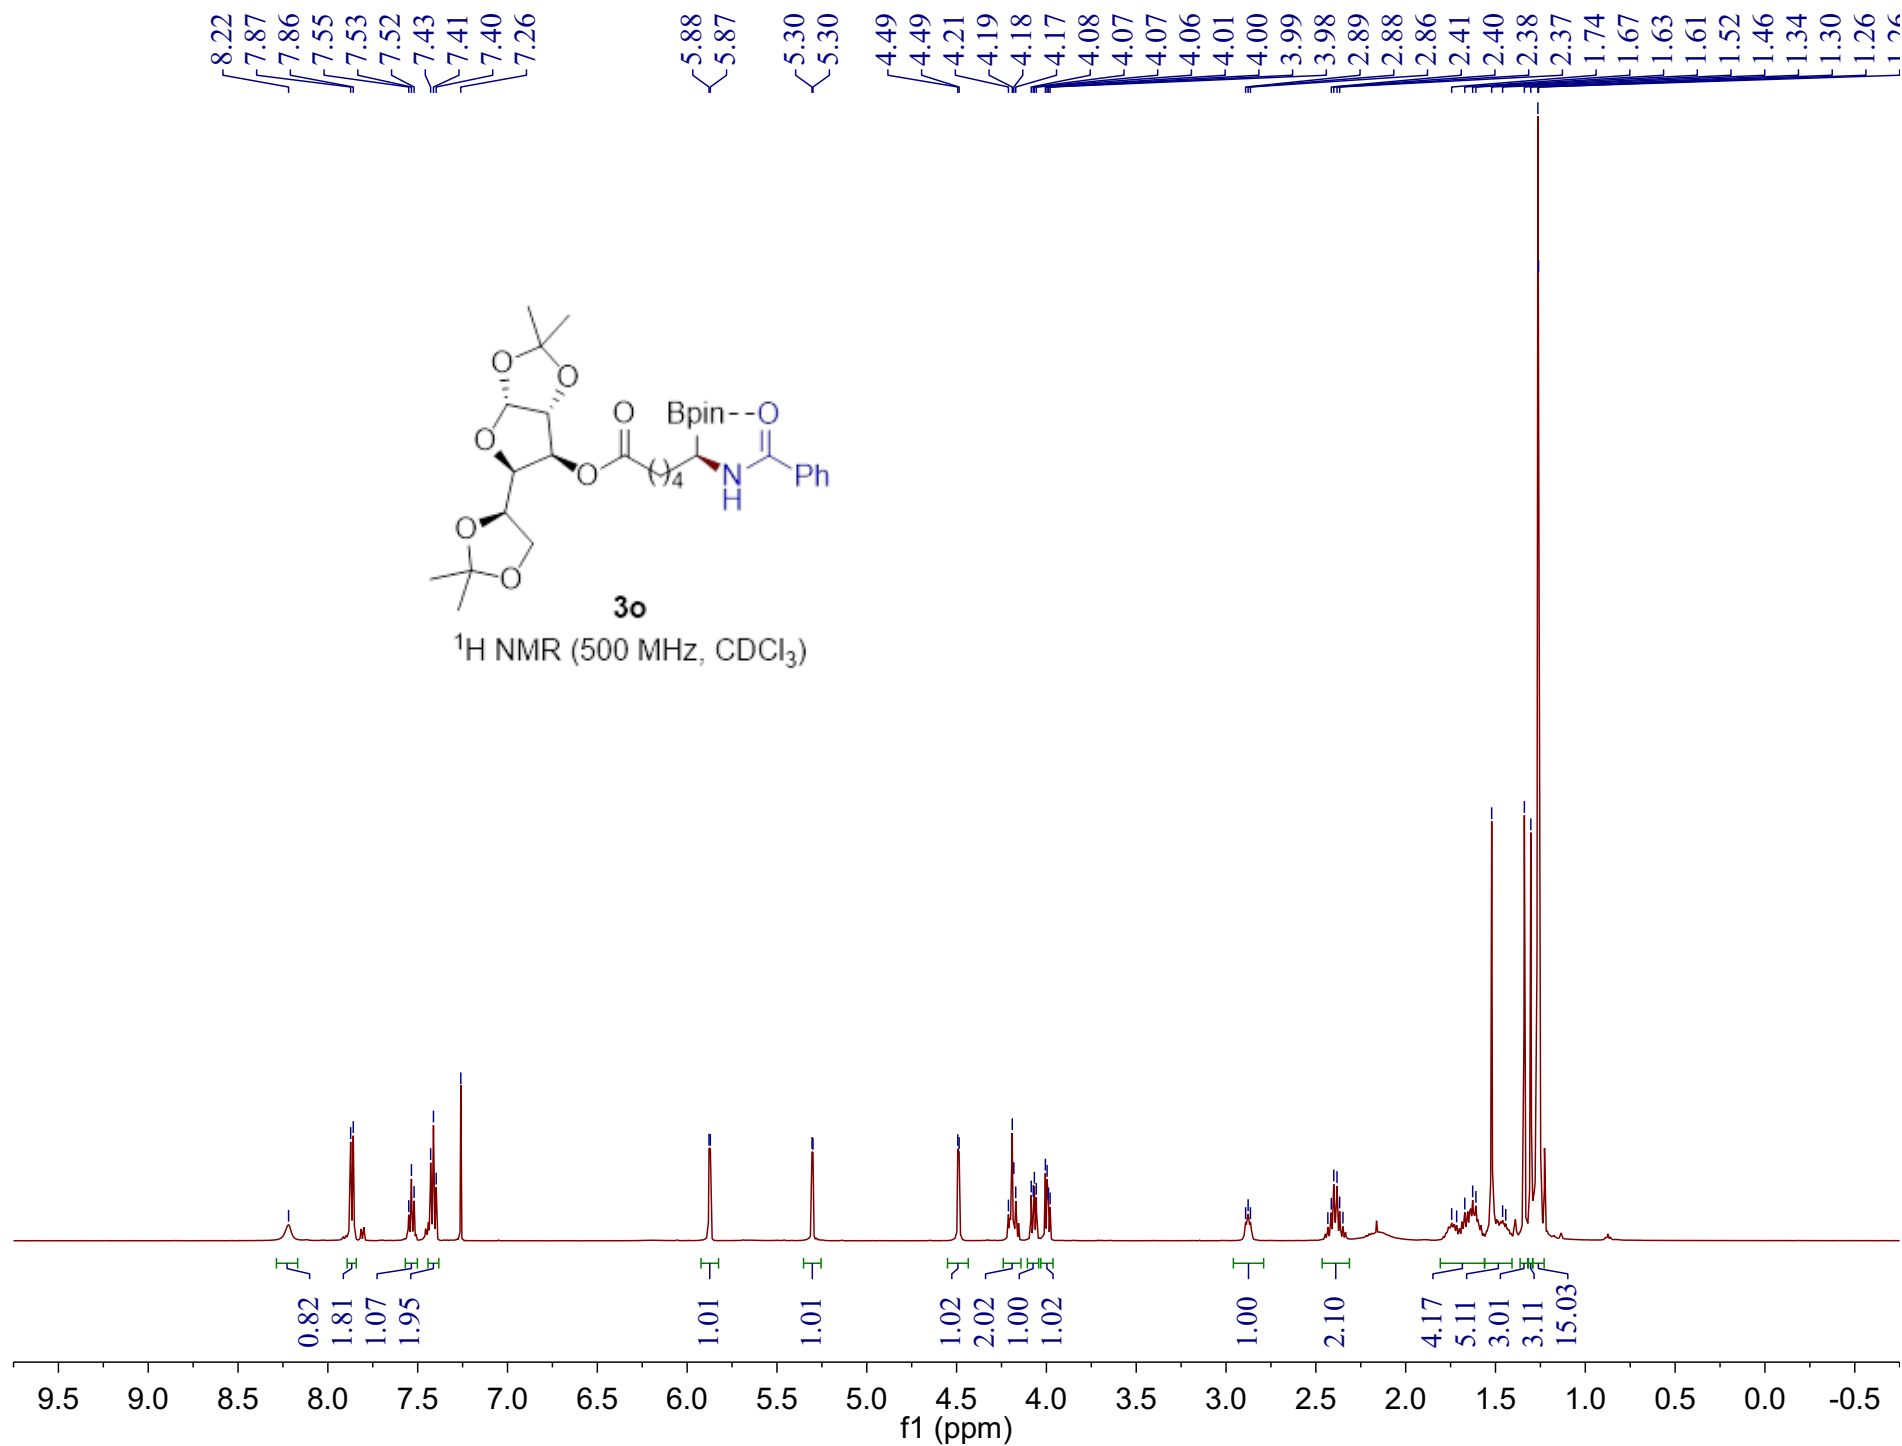

Supplementary Figure 47: <sup>1</sup>H NMR (500 MHz, CDCl<sub>3</sub>) spectrum of **3o**.

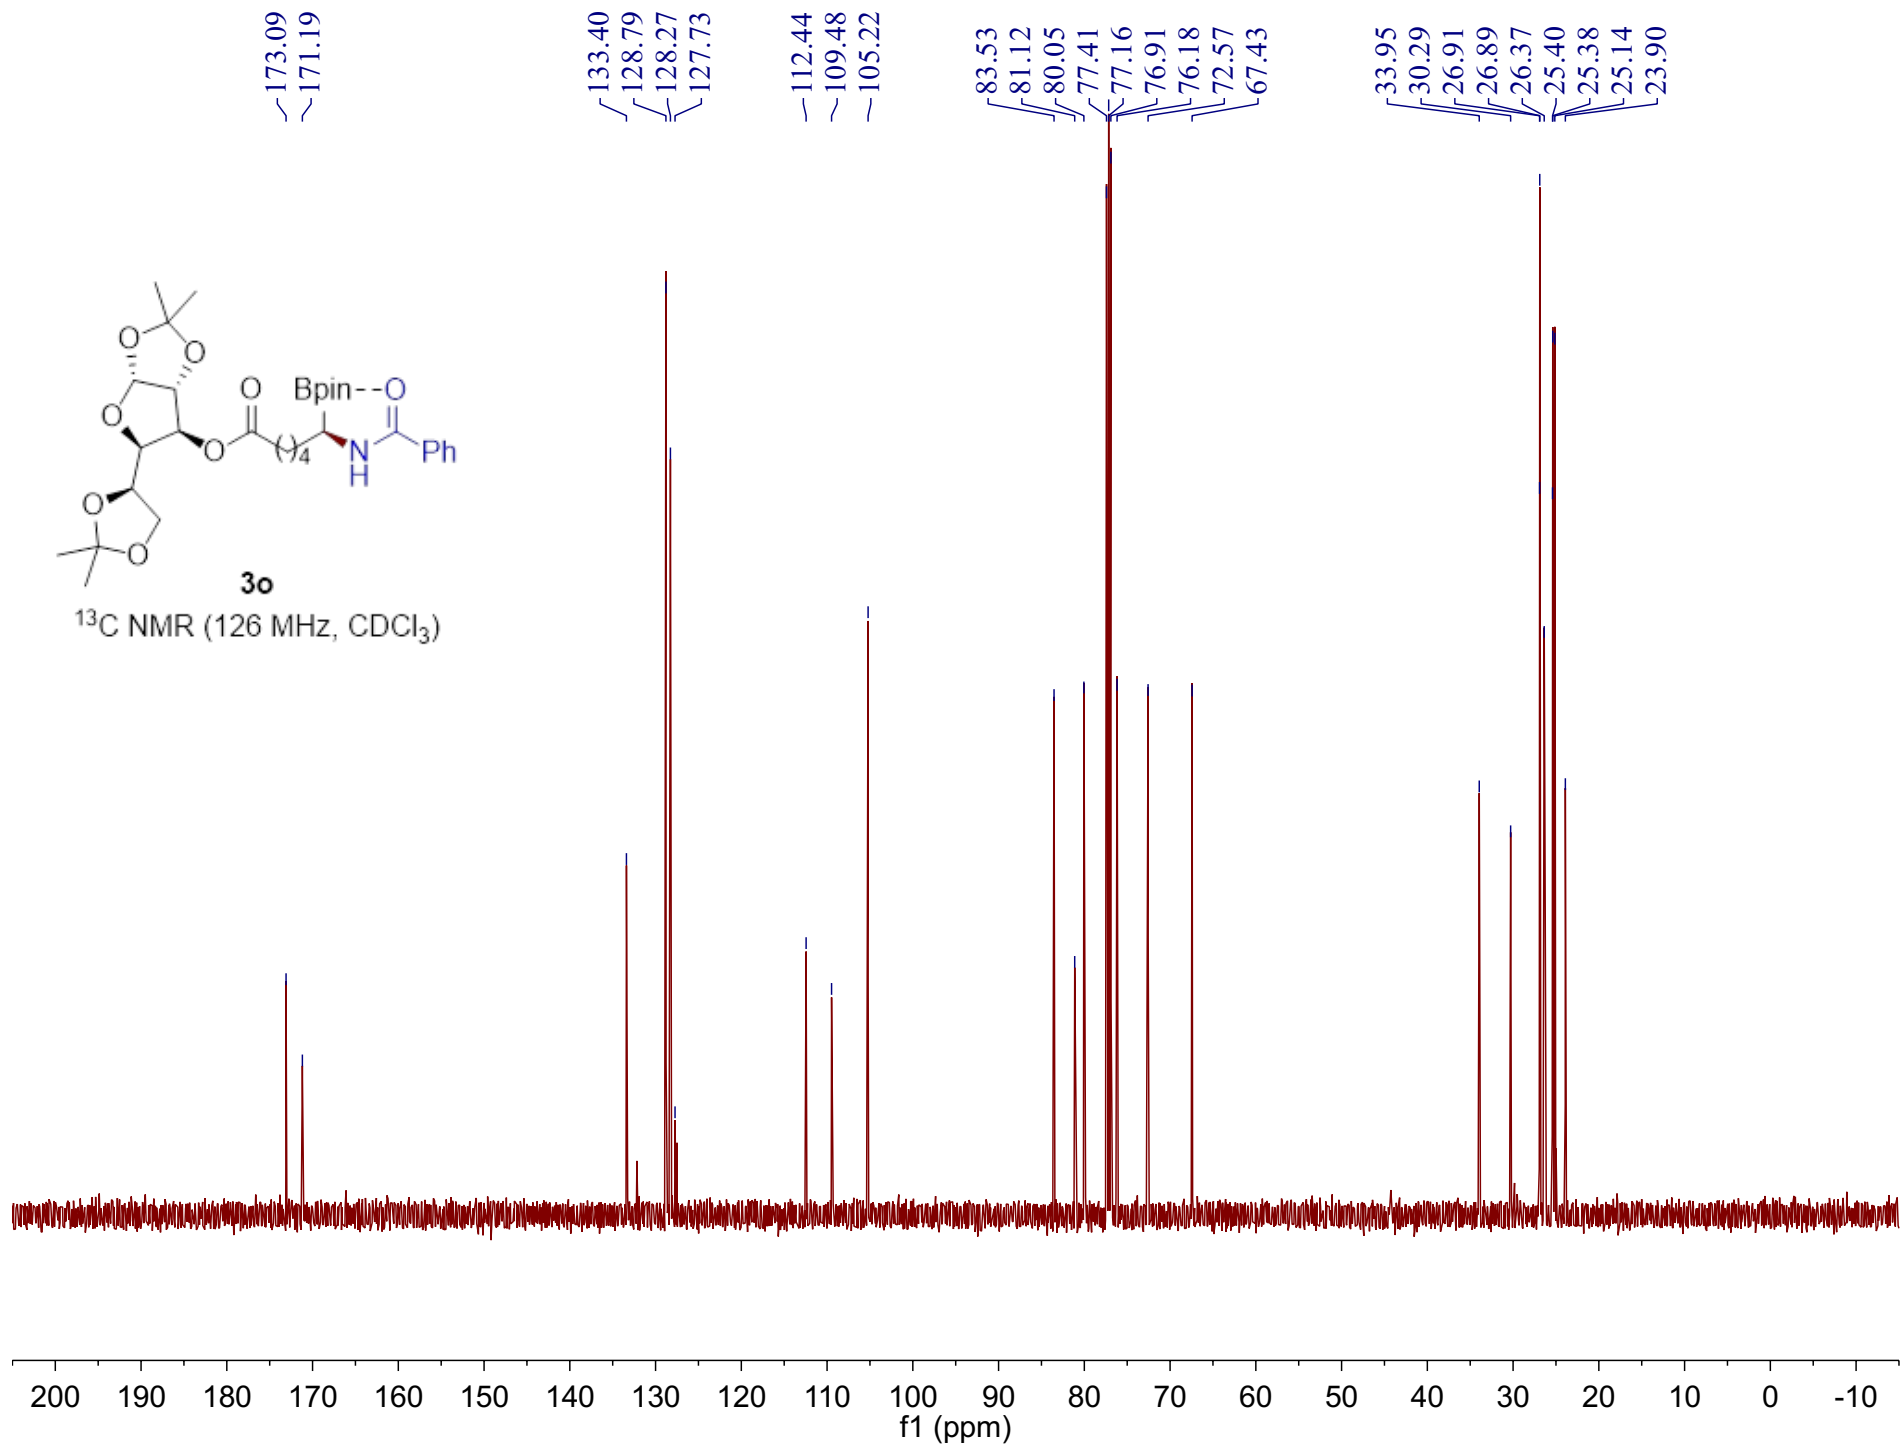

Supplementary Figure 48: <sup>13</sup>C NMR (126 MHz, CDCl<sub>3</sub>) spectrum of **3o**.



—17.67

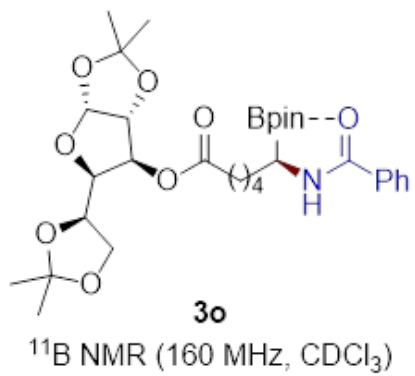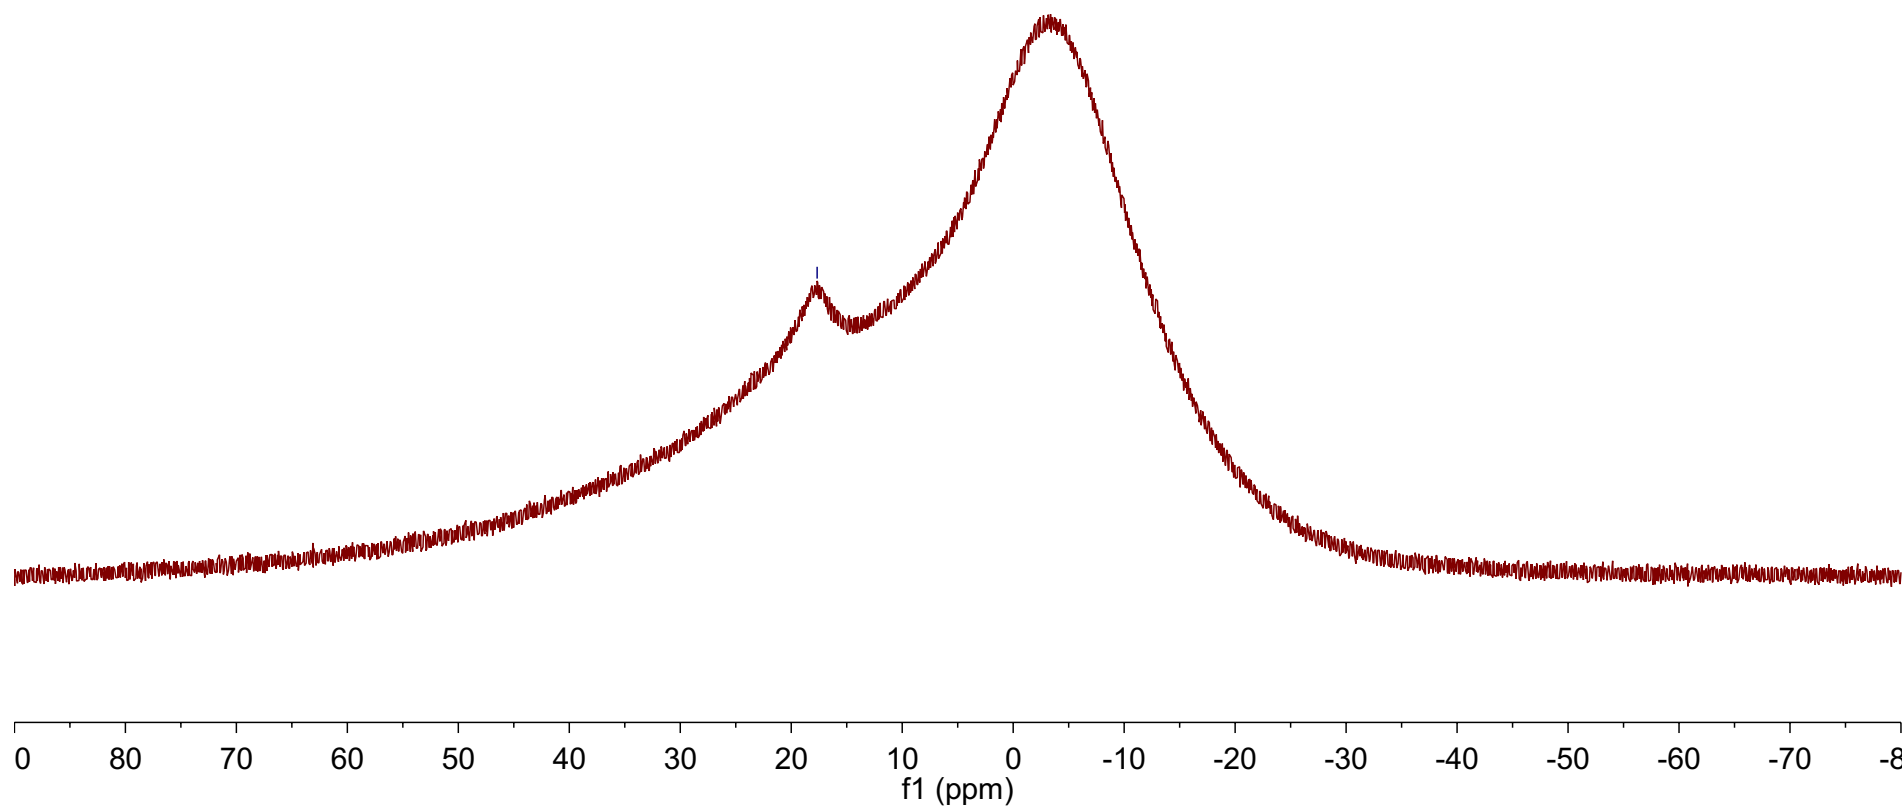

Supplementary Figure 49: <sup>11</sup>B NMR (160 MHz, CDCl<sub>3</sub>) spectrum of **3o**.



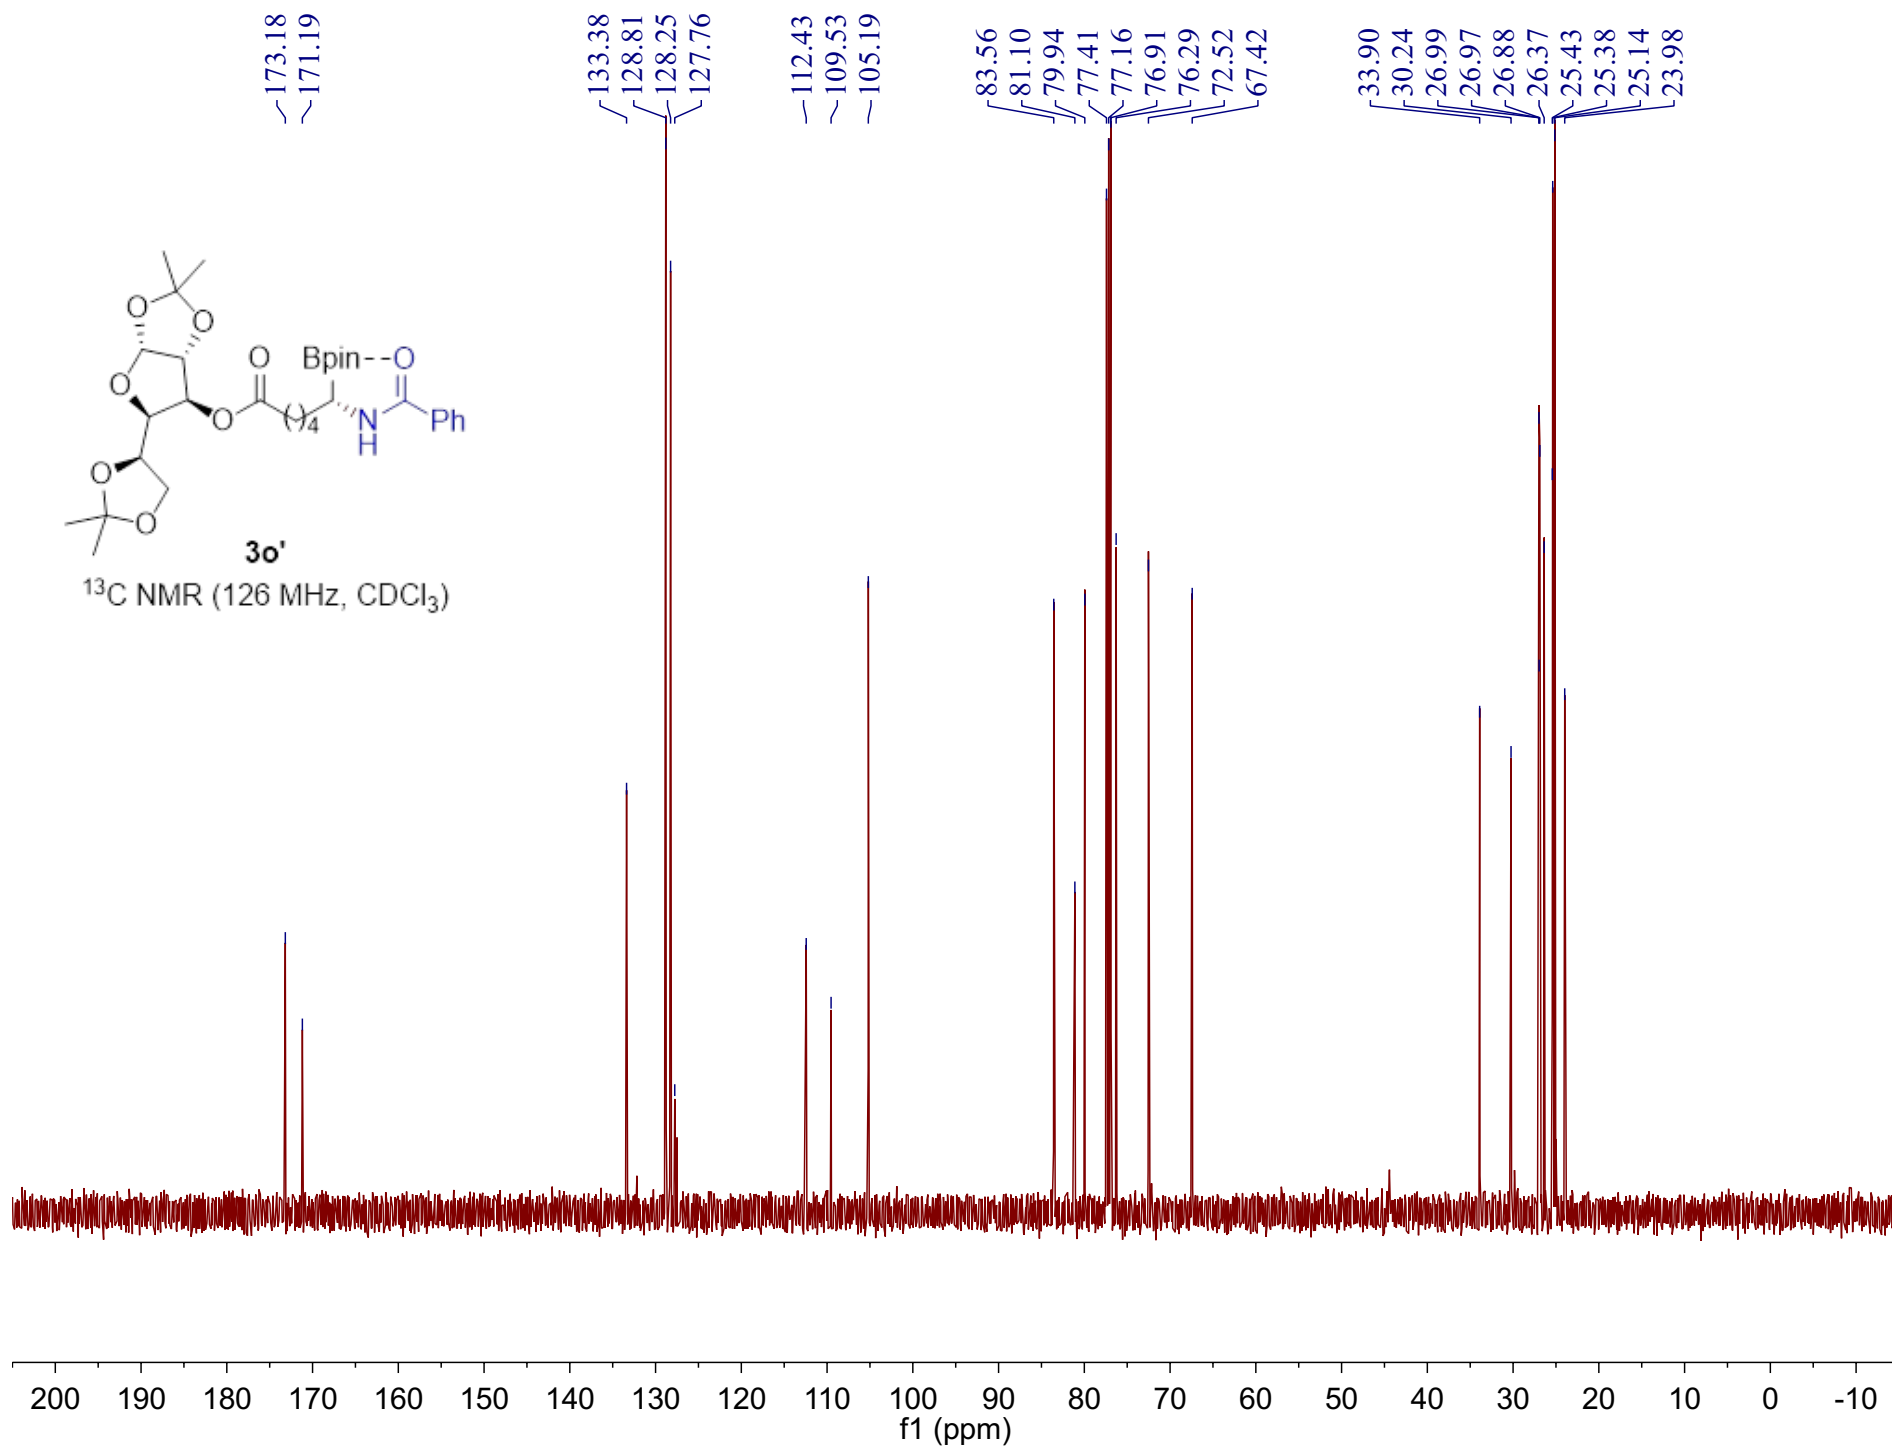

Supplementary Figure 51: <sup>13</sup>C NMR (126 MHz, CDCl<sub>3</sub>) spectrum of **30'**.

-17.54

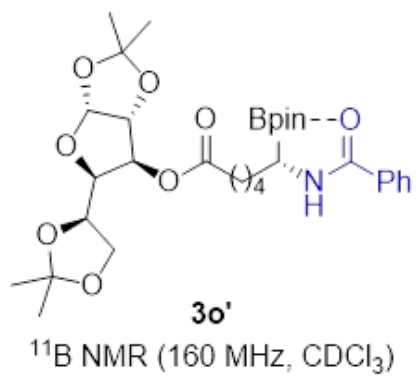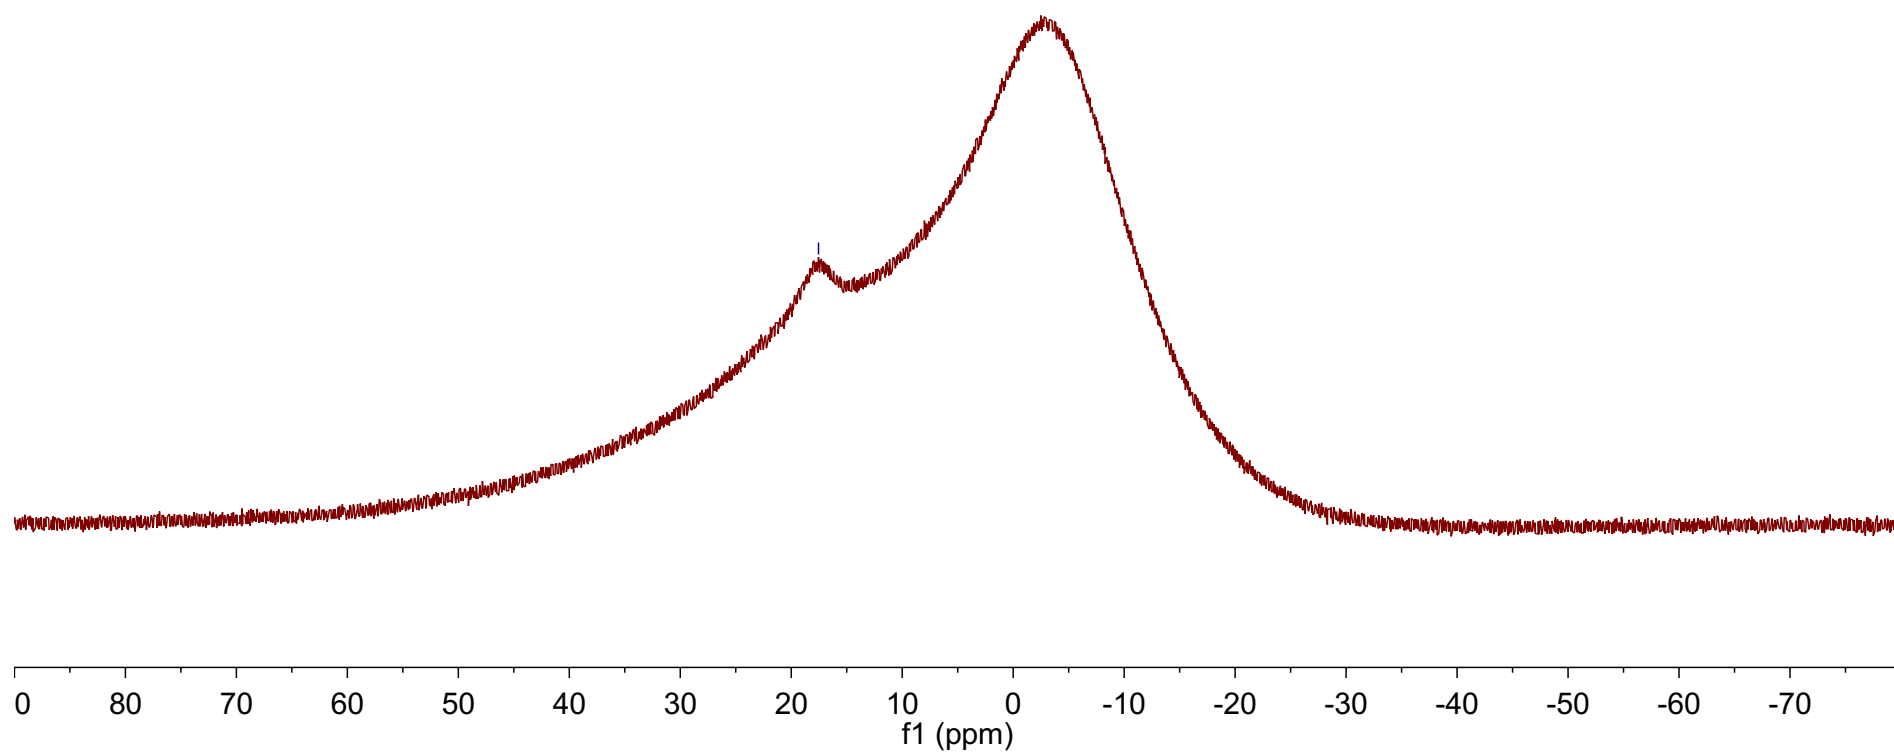

Supplementary Figure 52: <sup>11</sup>B NMR (160 MHz, CDCl<sub>3</sub>) spectrum of 30'.

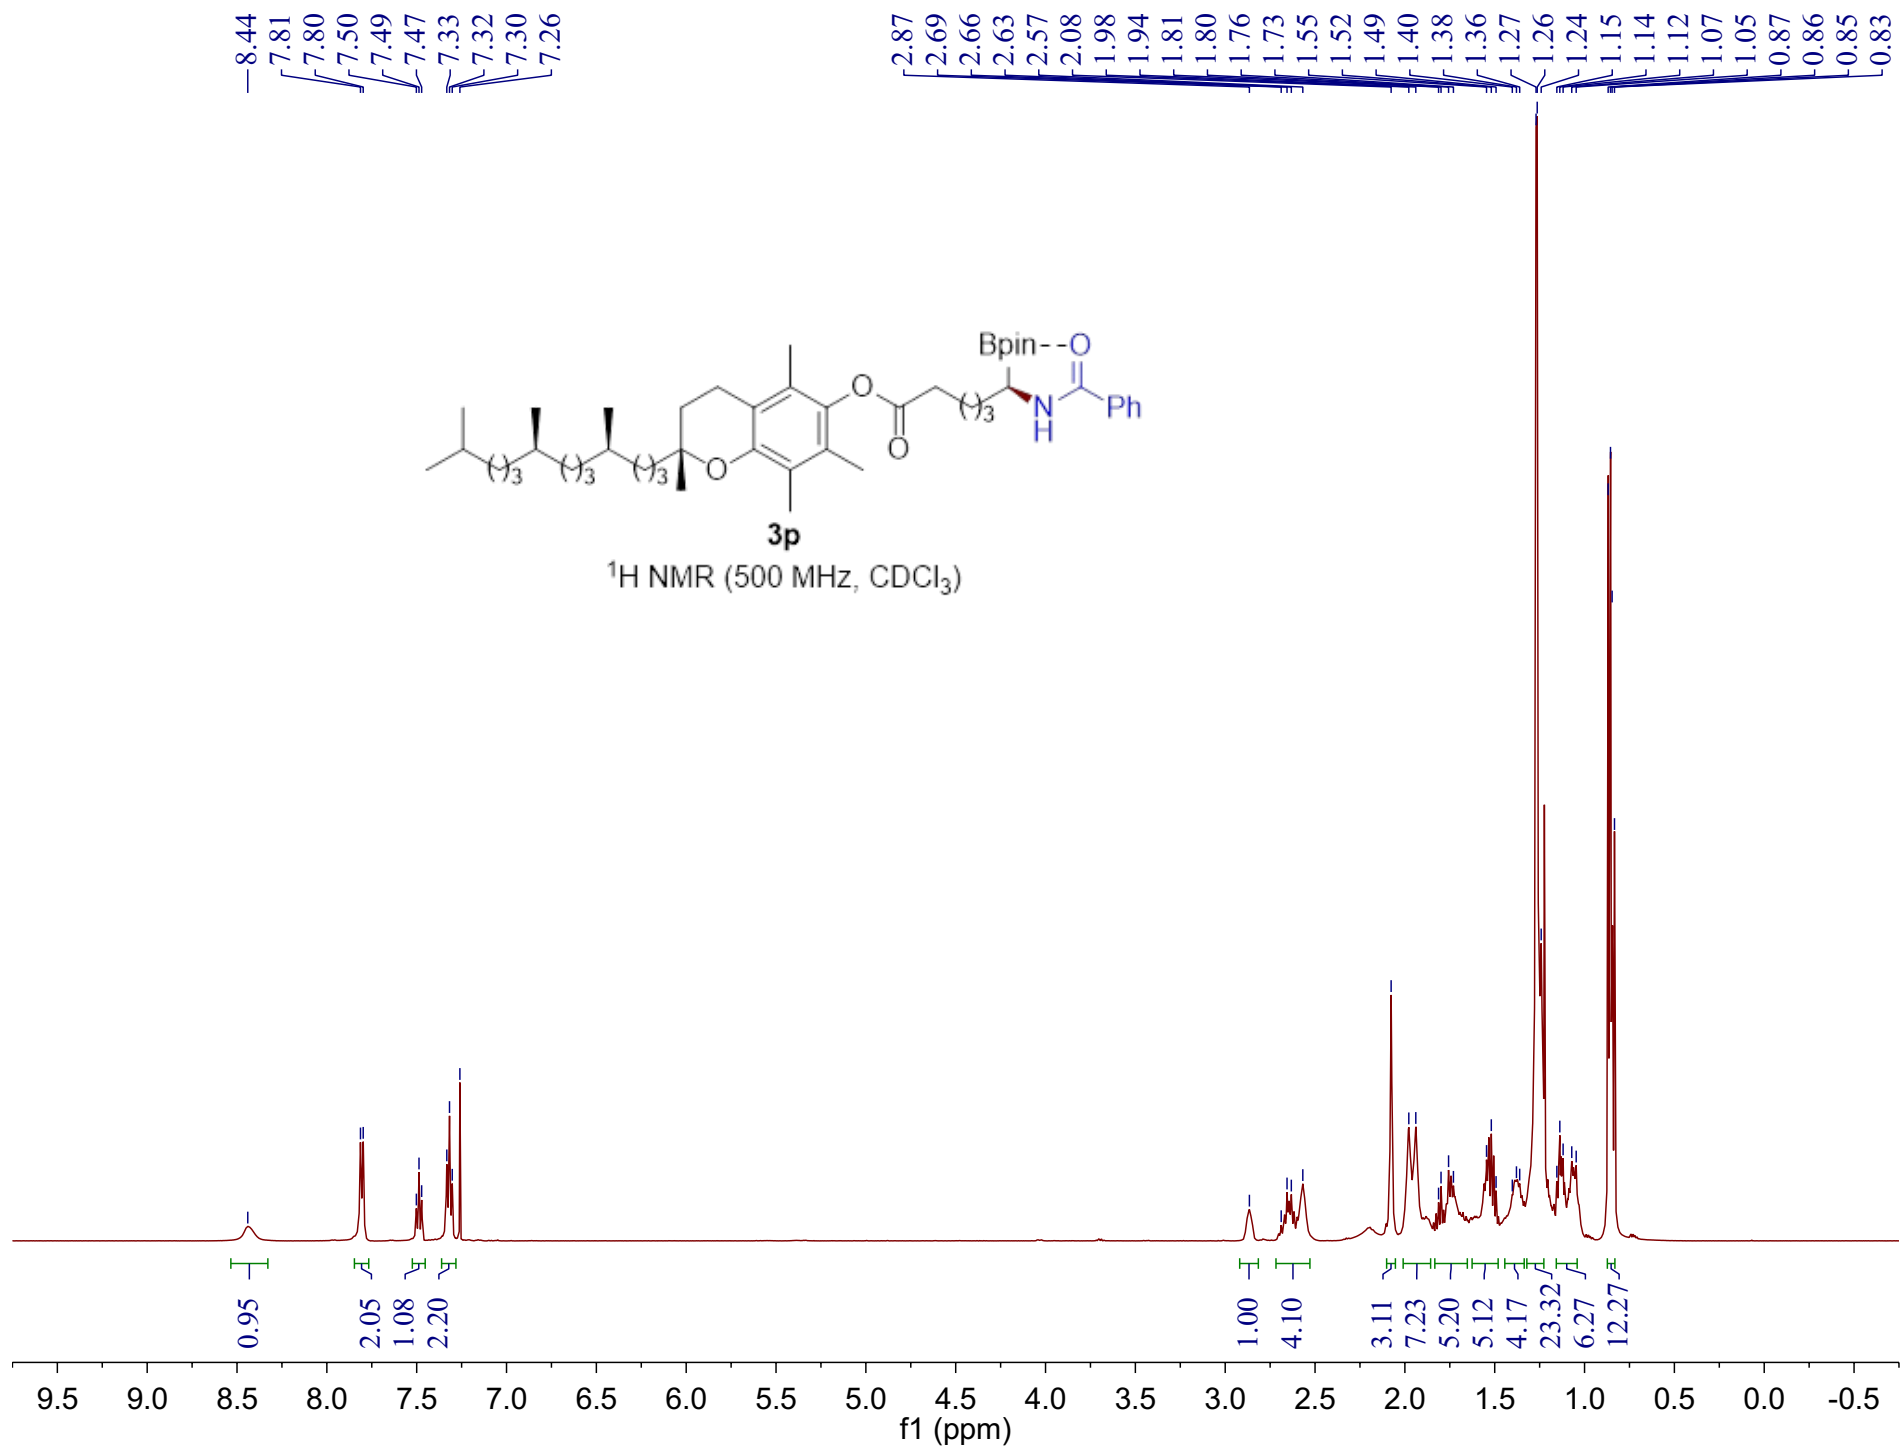

Supplementary Figure 53: <sup>1</sup>H NMR (500 MHz, CDCl<sub>3</sub>) spectrum of **3p**.

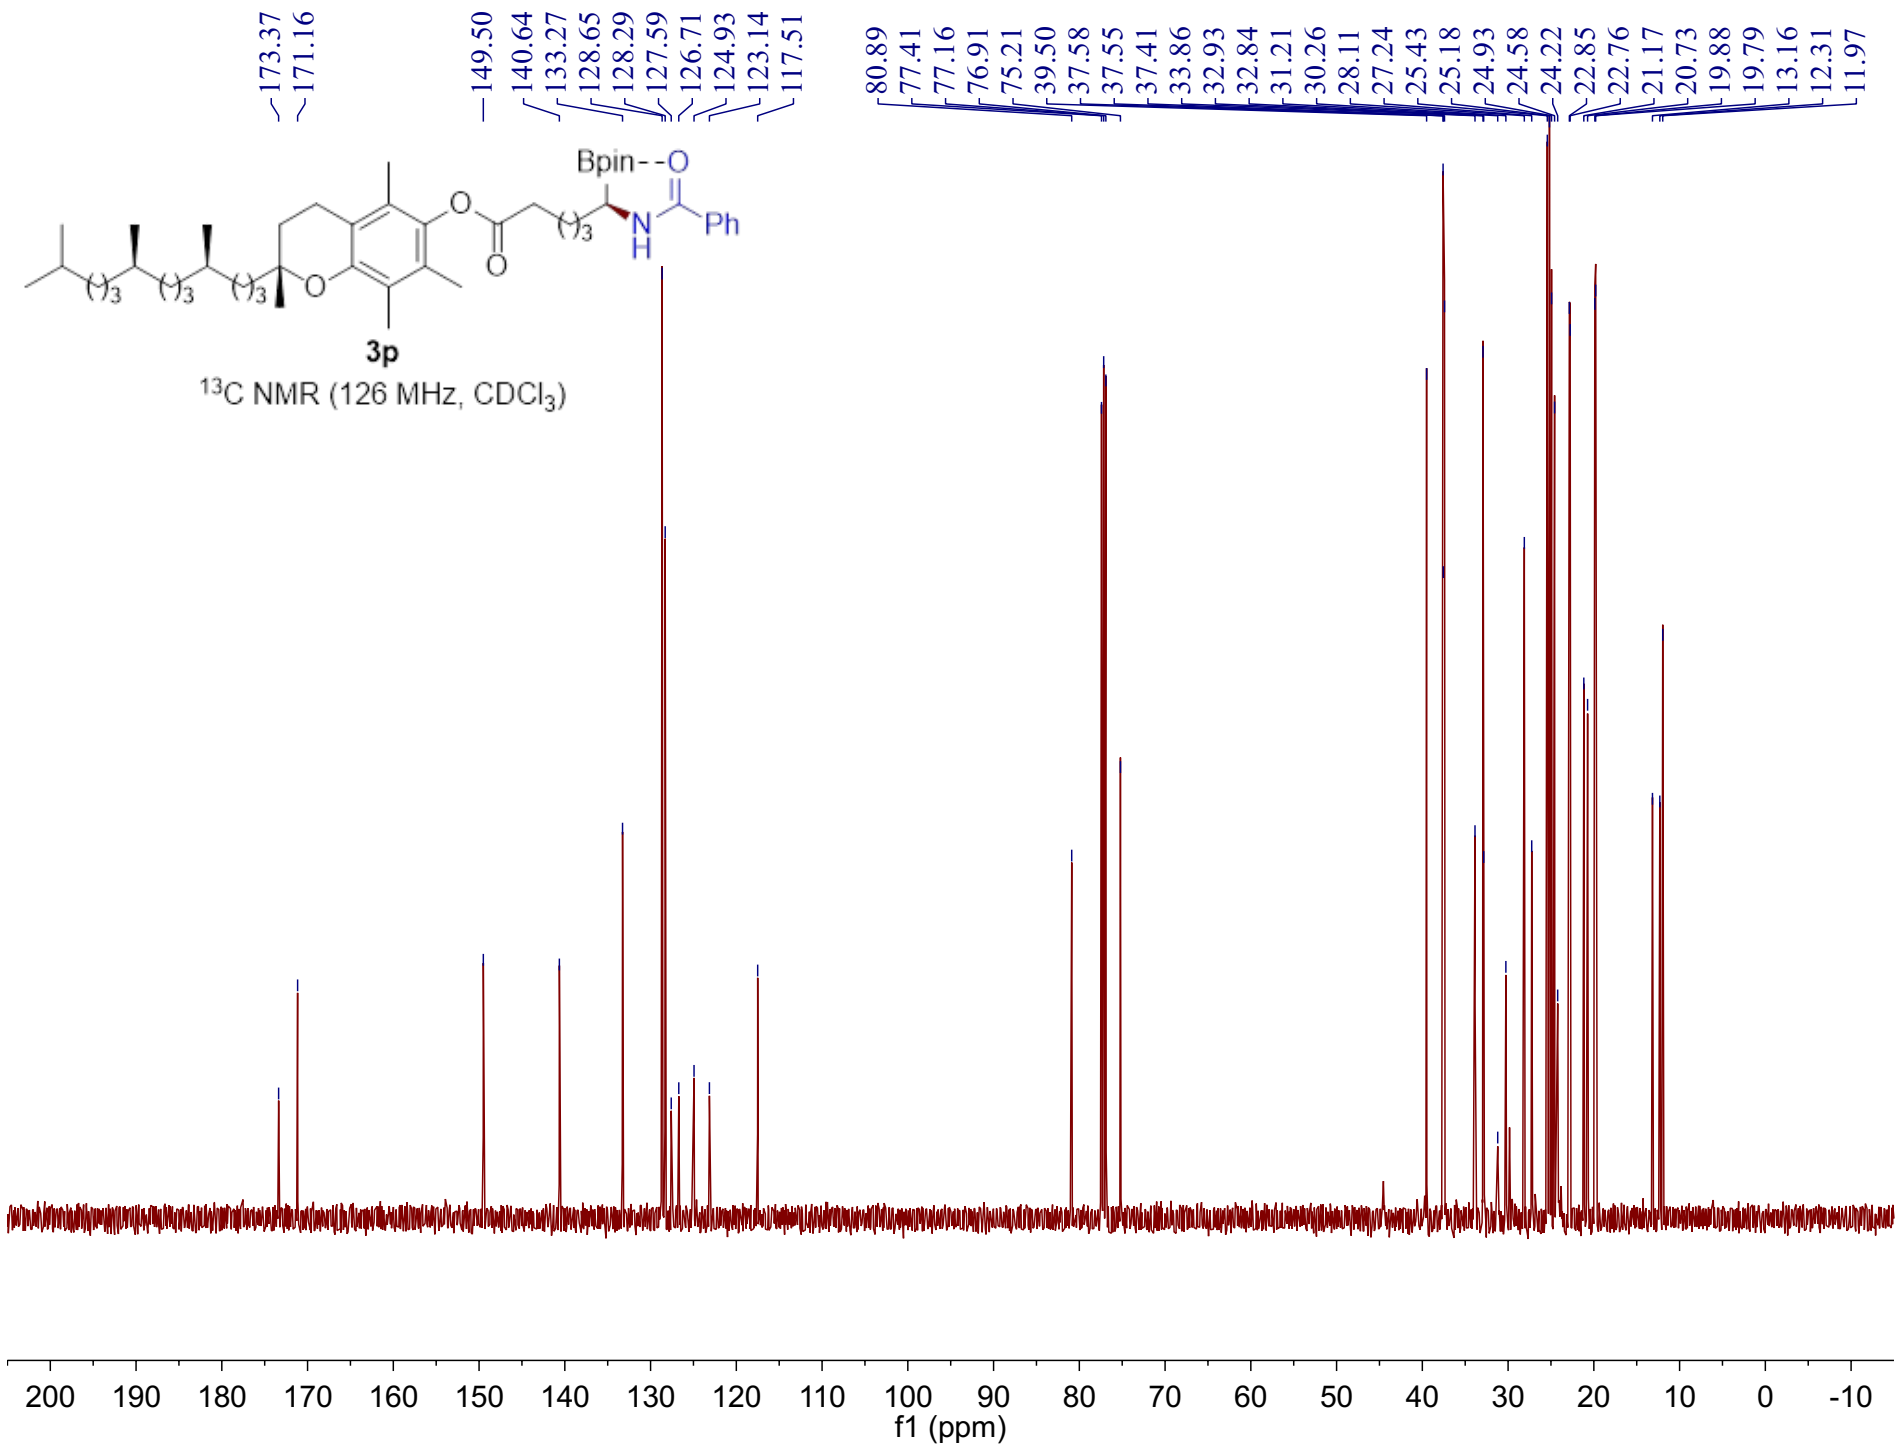

Supplementary Figure 54:  $^{13}\text{C}$  NMR (126 MHz,  $\text{CDCl}_3$ ) spectrum of **3p**.

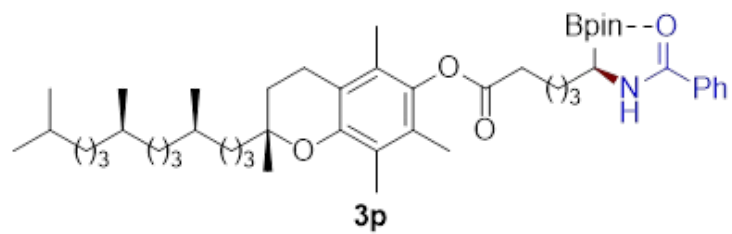

<sup>11</sup>B NMR (160 MHz, CDCl<sub>3</sub>)

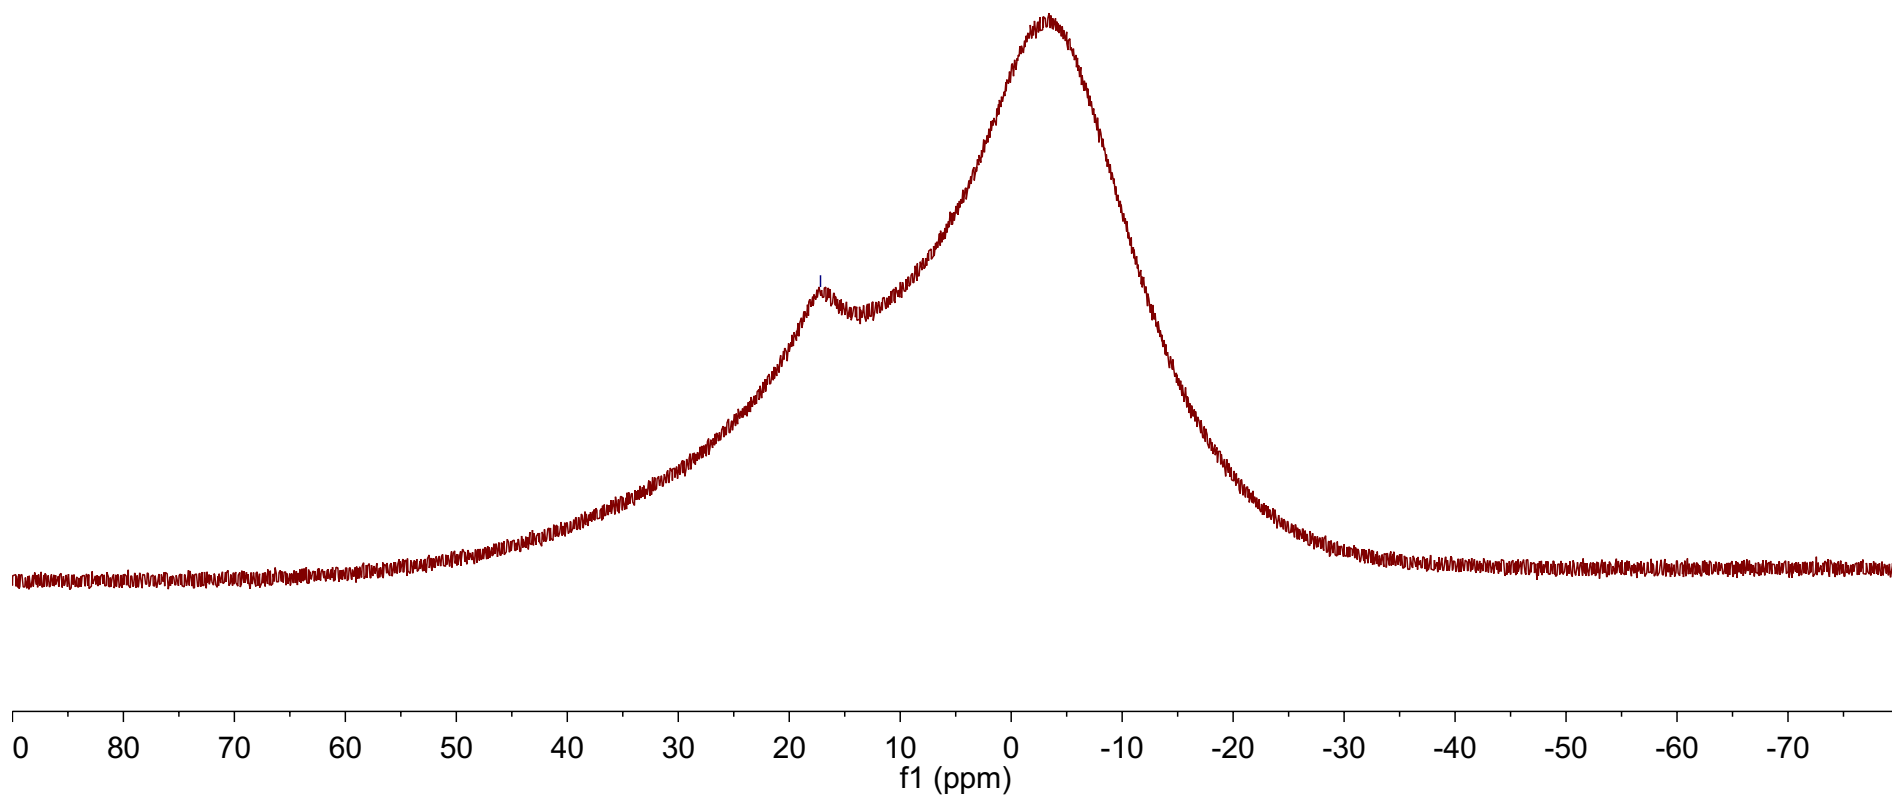

Supplementary Figure 55: <sup>11</sup>B NMR (160 MHz, CDCl<sub>3</sub>) spectrum of **3p**.

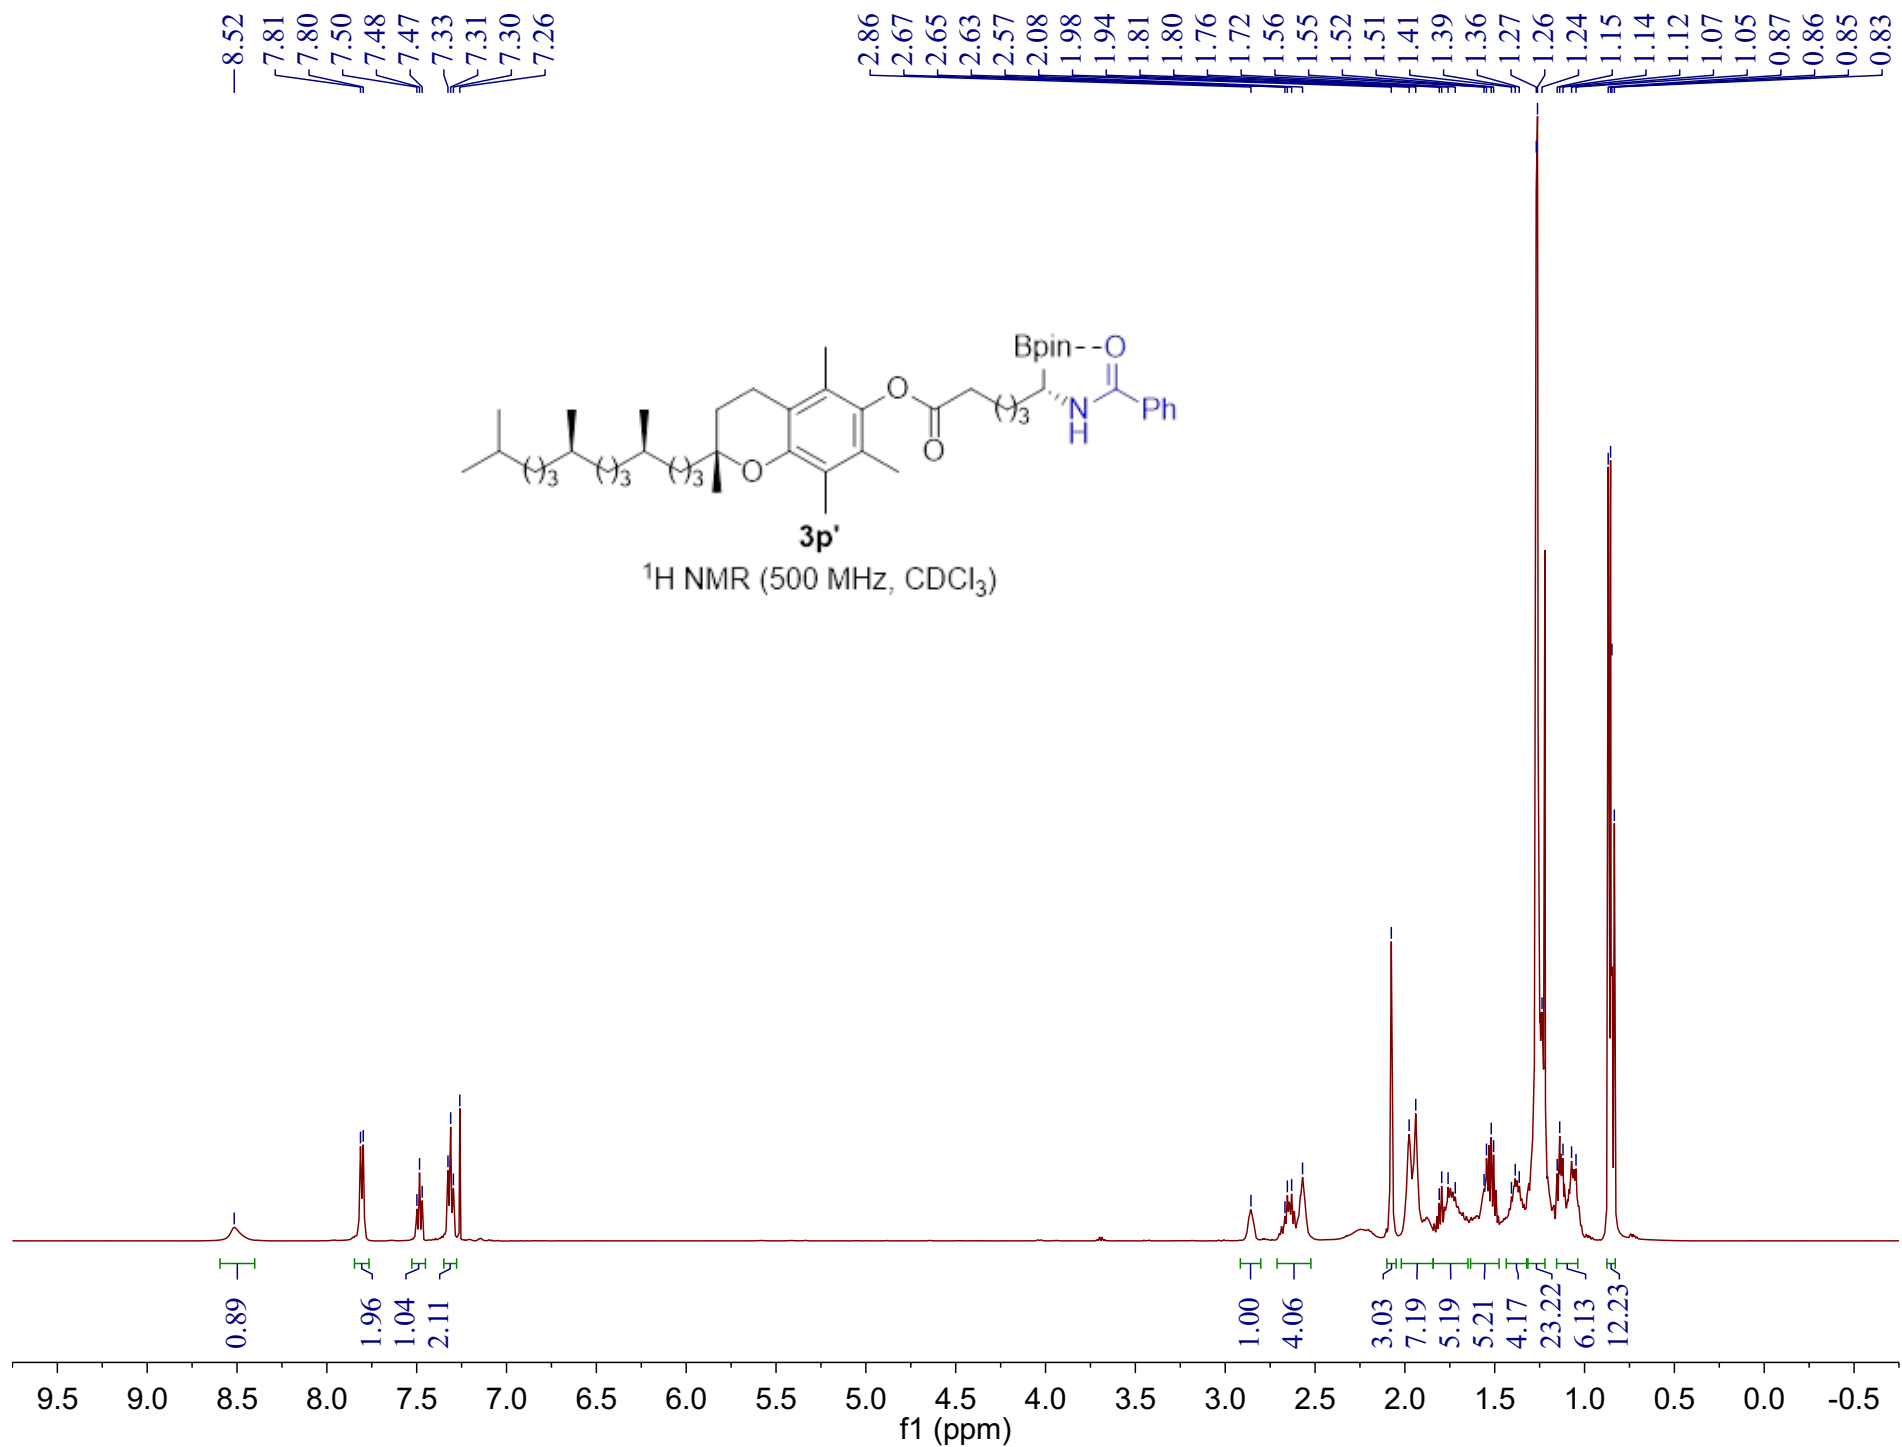

Supplementary Figure 56: <sup>1</sup>H NMR (500 MHz, CDCl<sub>3</sub>) spectrum of **3p'**.



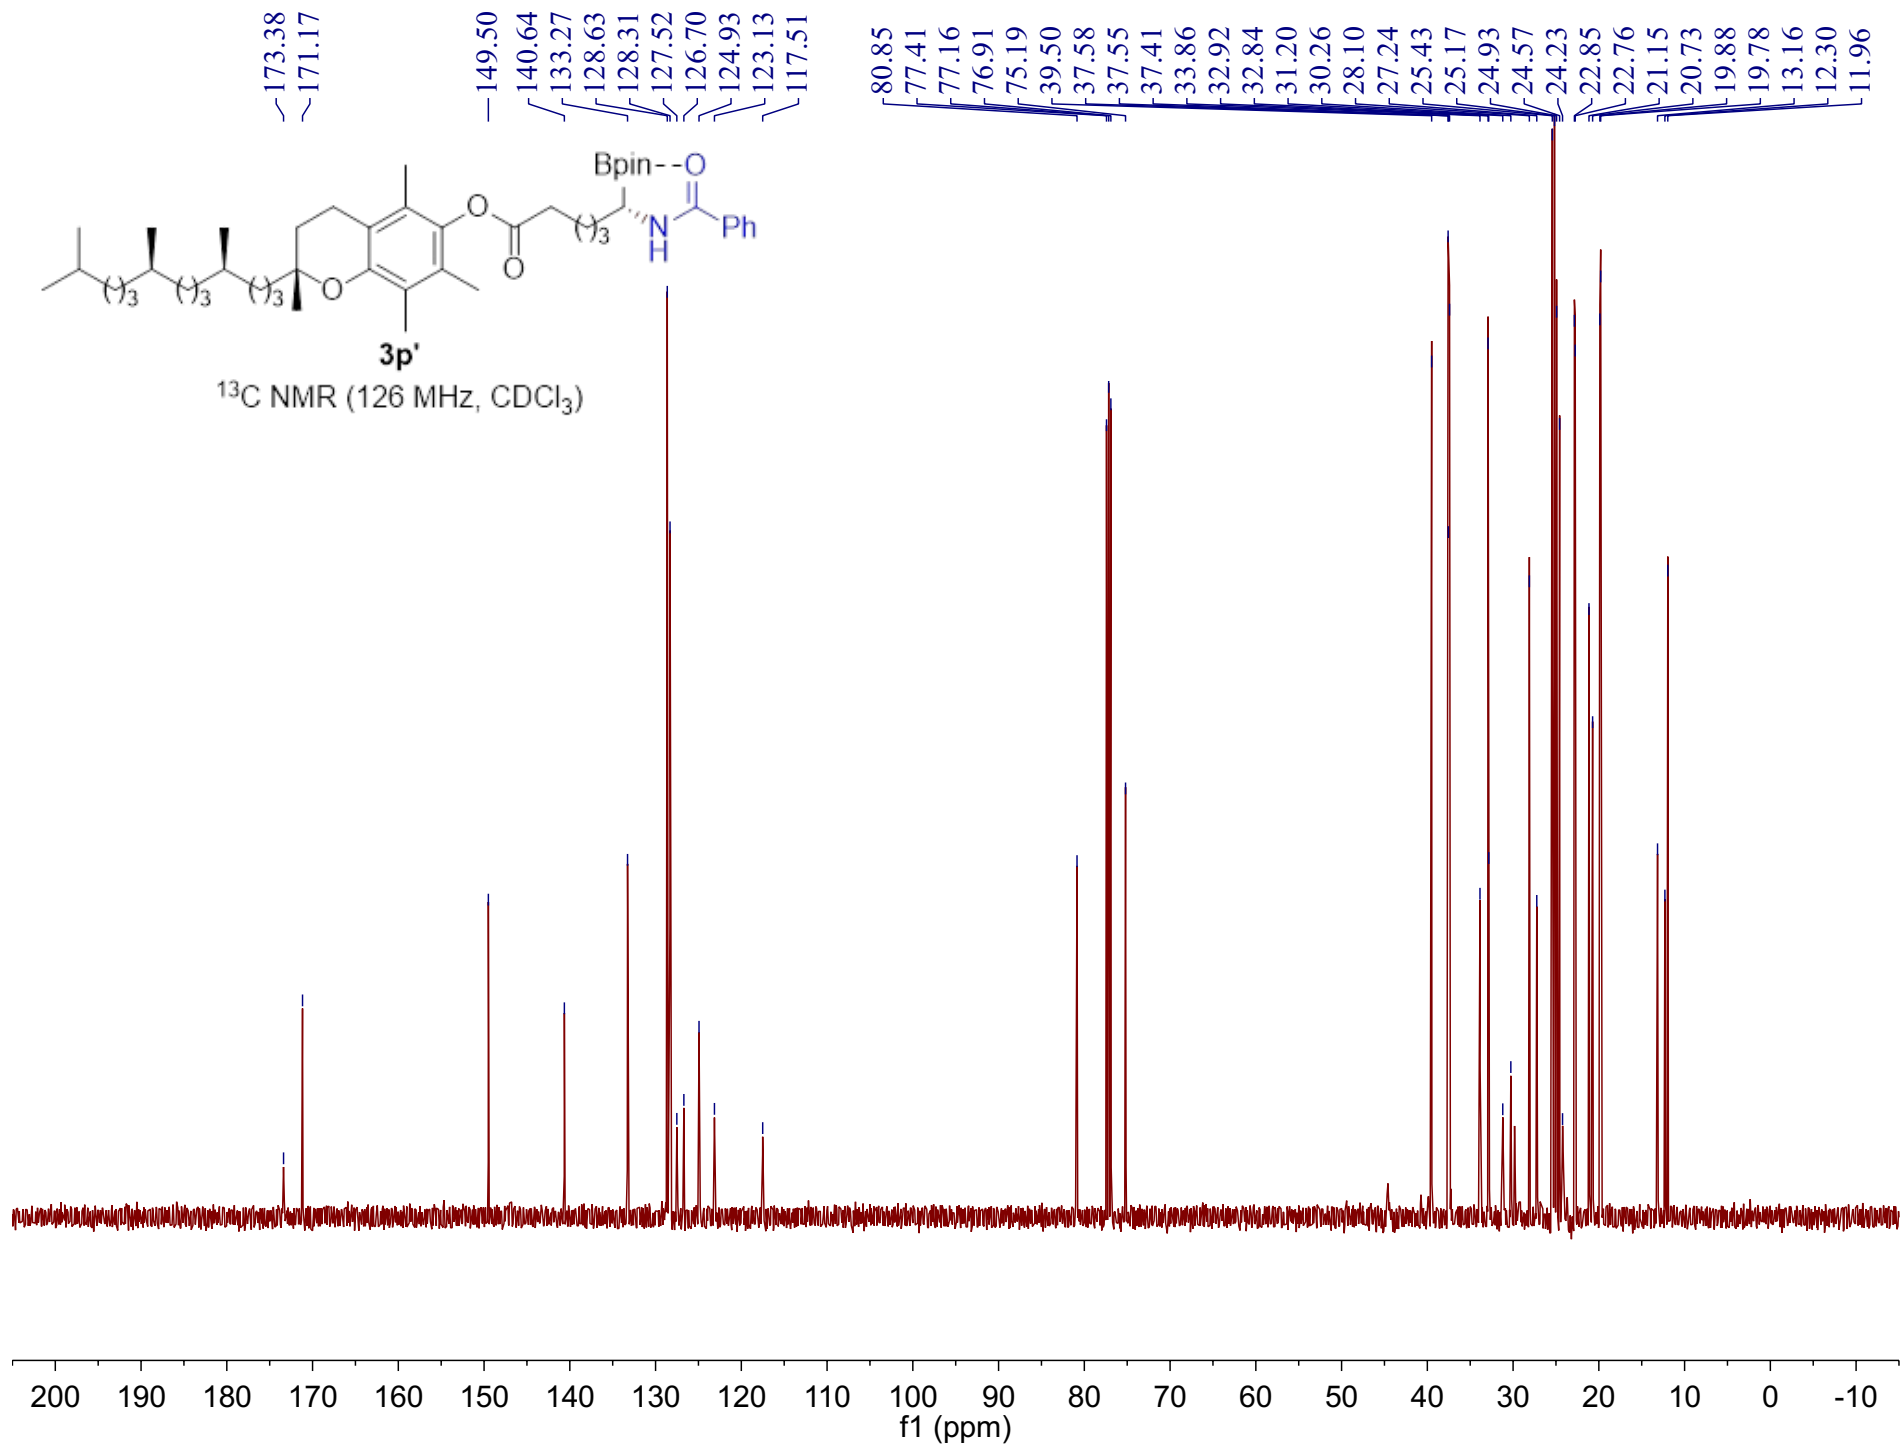

Supplementary Figure 57: <sup>13</sup>C NMR (126 MHz, CDCl<sub>3</sub>) spectrum of **3p'**.

—17.06

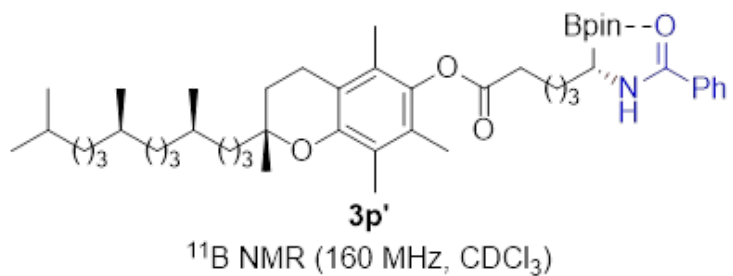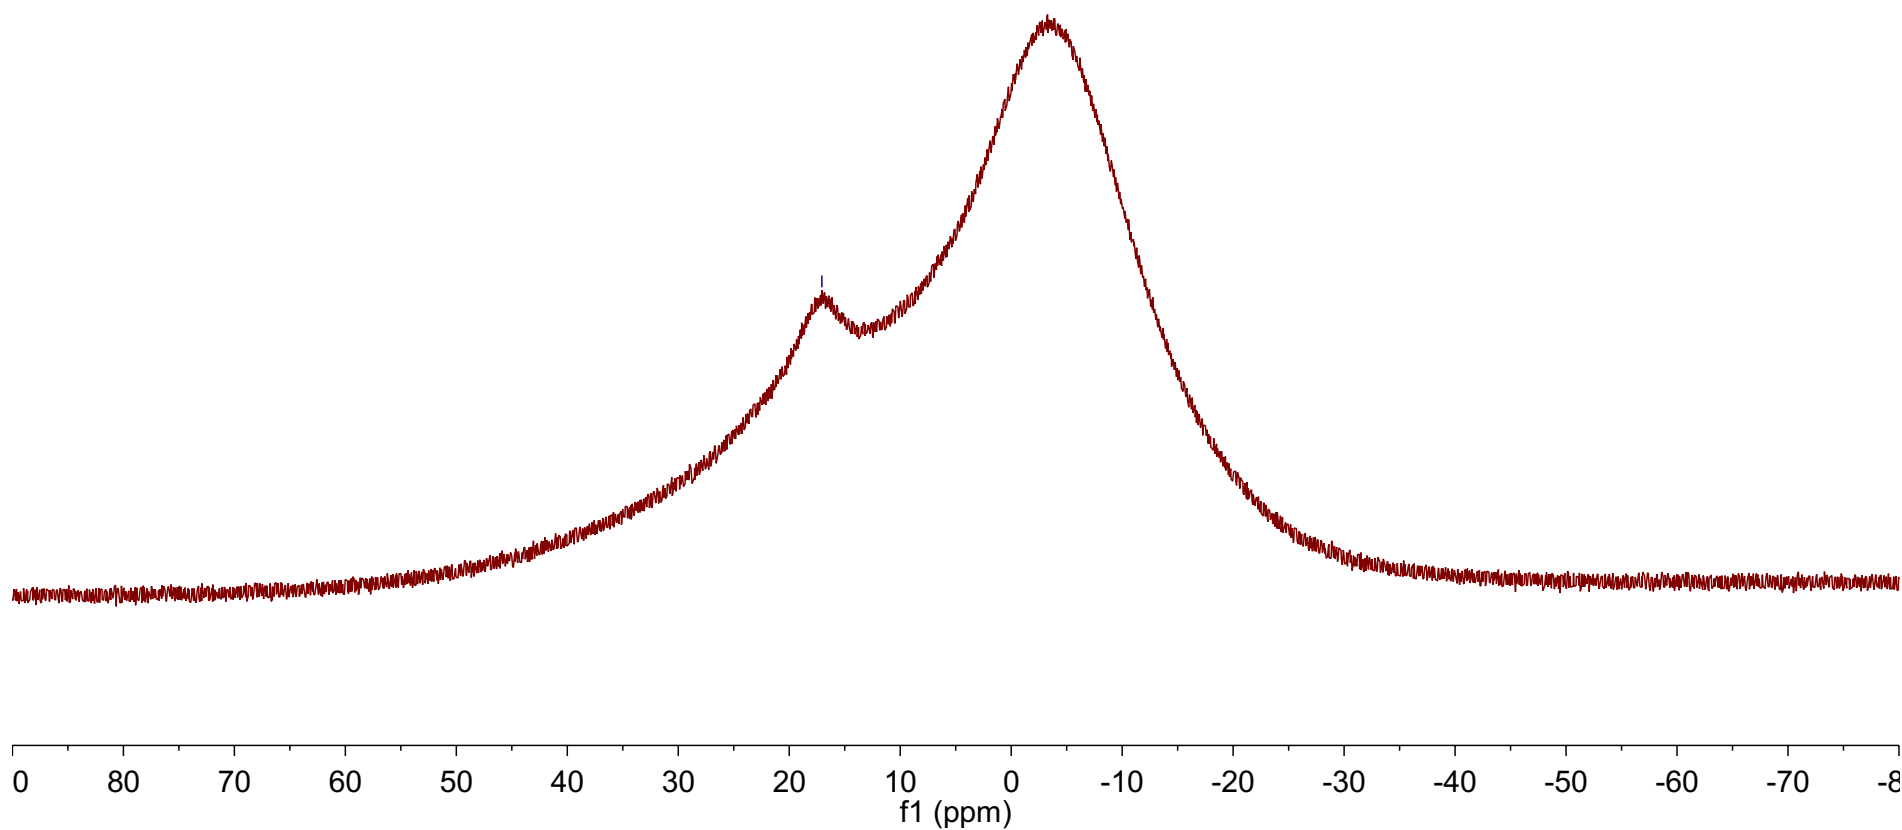

Supplementary Figure 58:  $^{11}\text{B}$  NMR (160 MHz,  $\text{CDCl}_3$ ) spectrum of **3p'**.

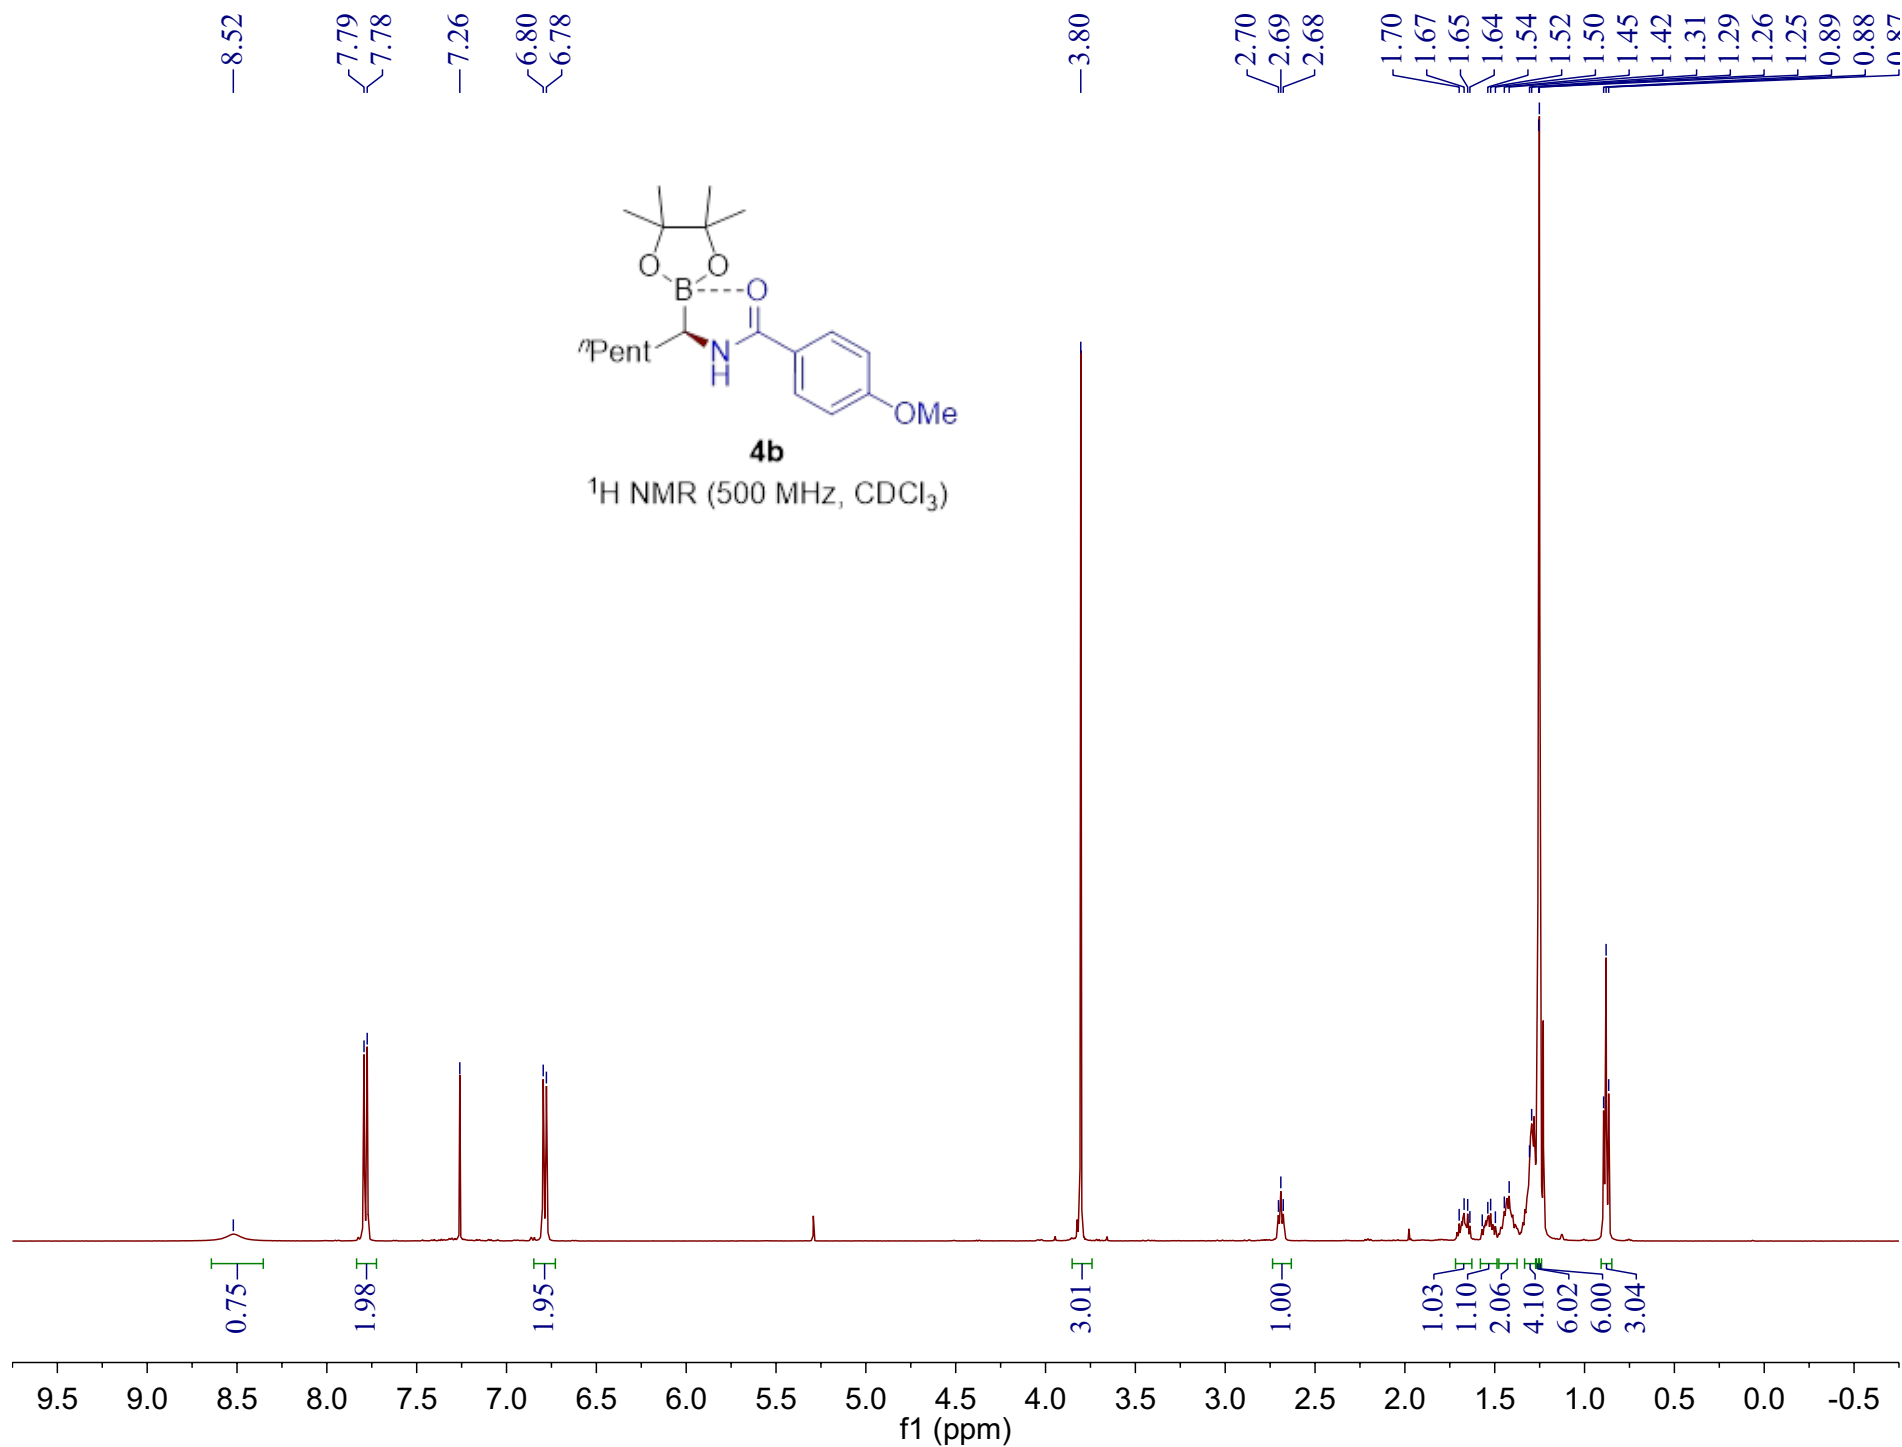

Supplementary Figure 59: <sup>1</sup>H NMR (500 MHz, CDCl<sub>3</sub>) spectrum of **4b**.

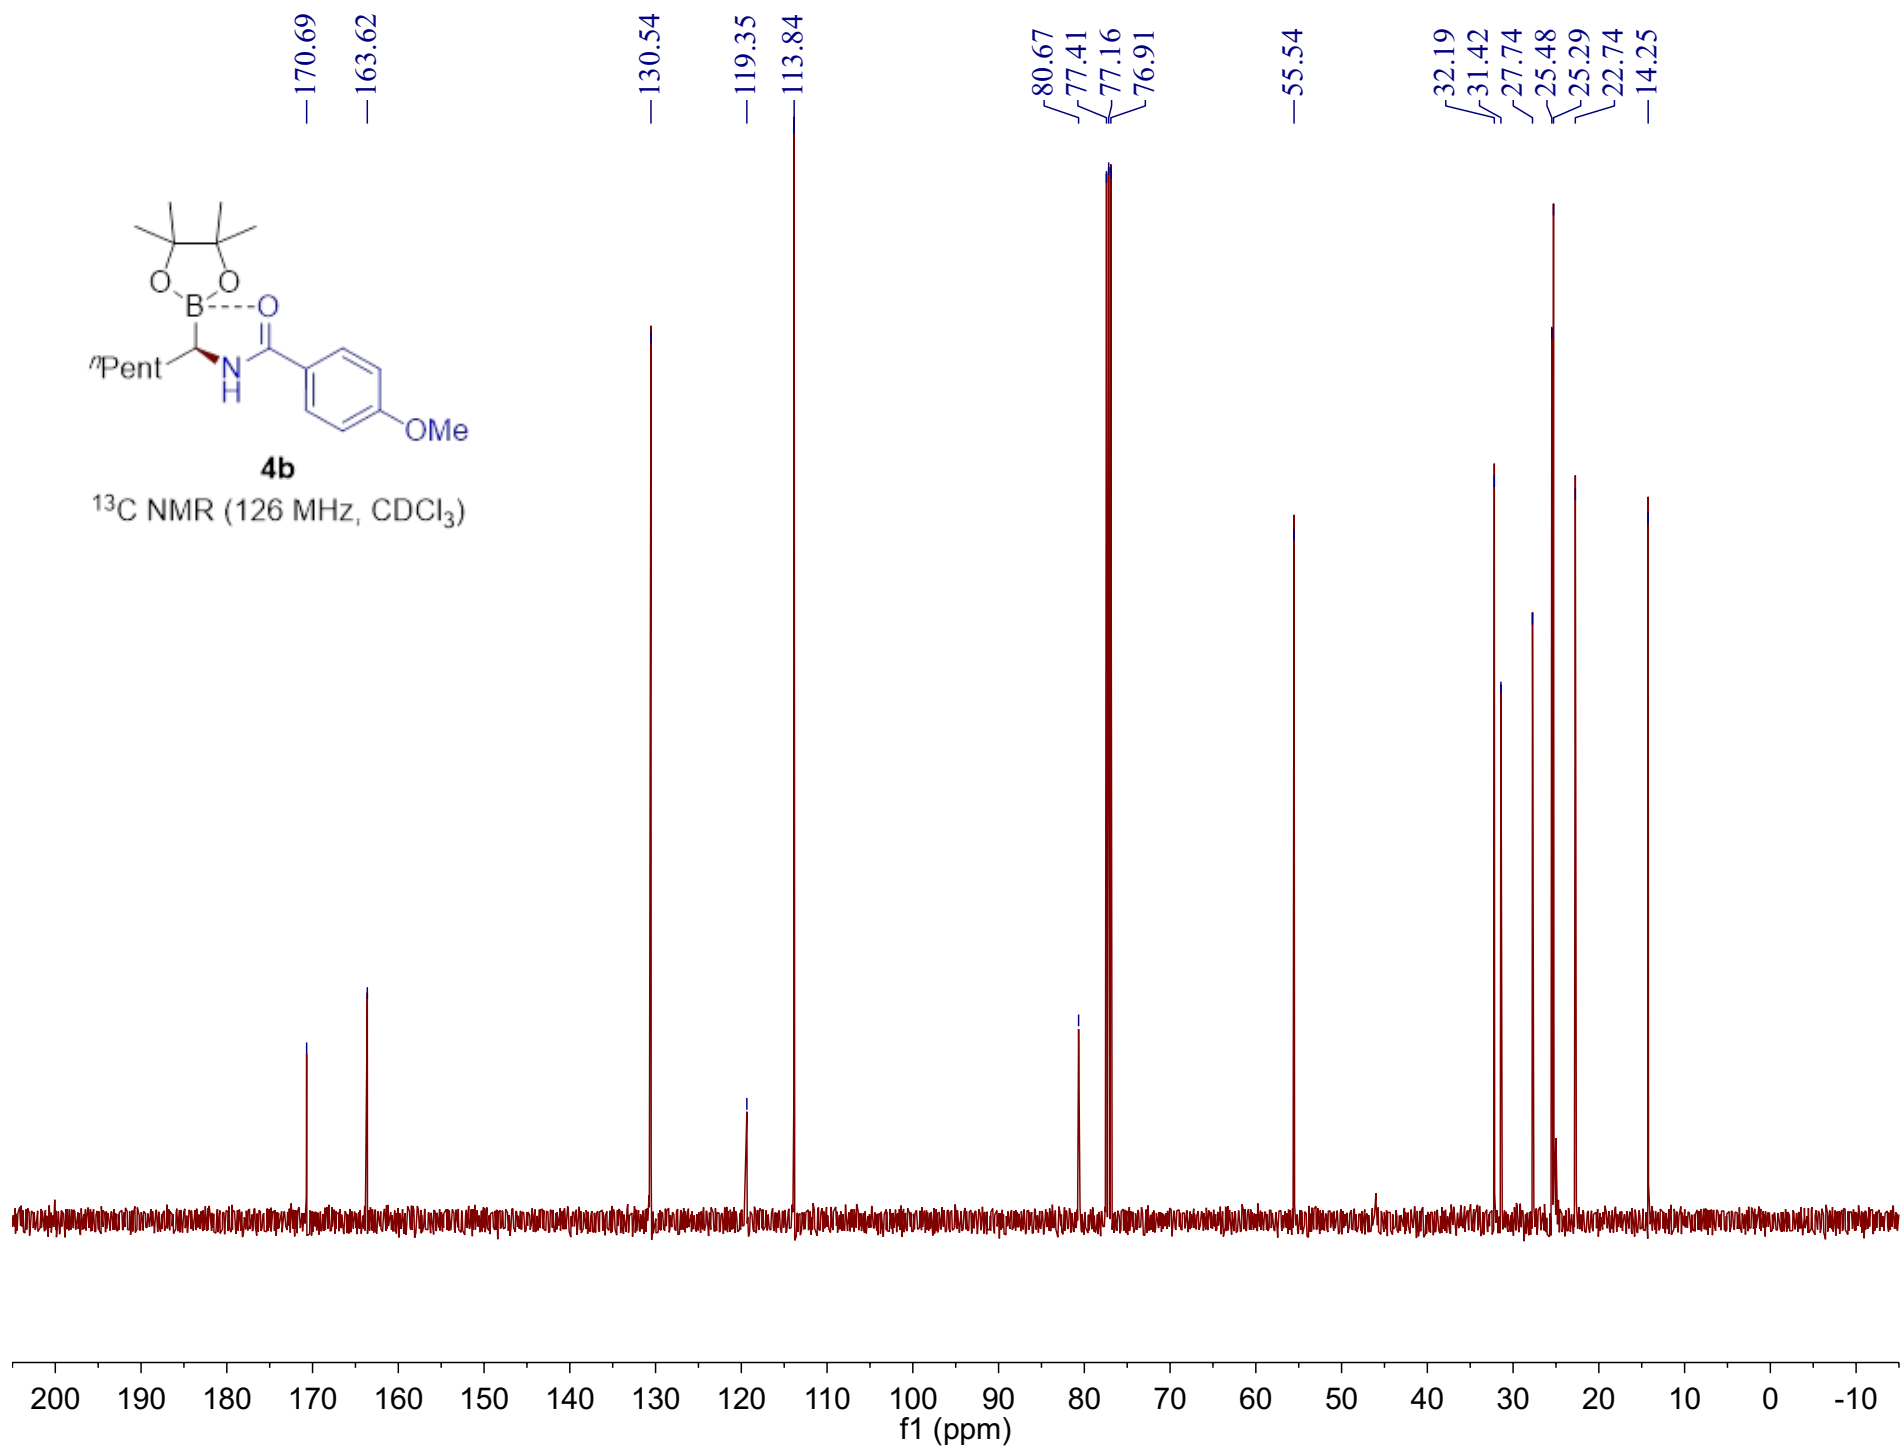

Supplementary Figure 60: <sup>13</sup>C NMR (126 MHz, CDCl<sub>3</sub>) spectrum of **4b**.

-15.80

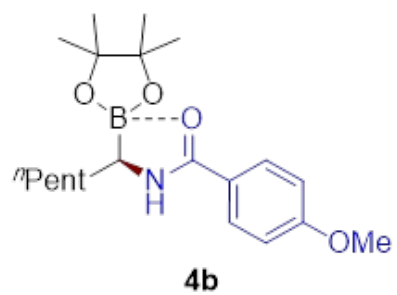

**4b**  
<sup>11</sup>B NMR (160 MHz, CDCl<sub>3</sub>)

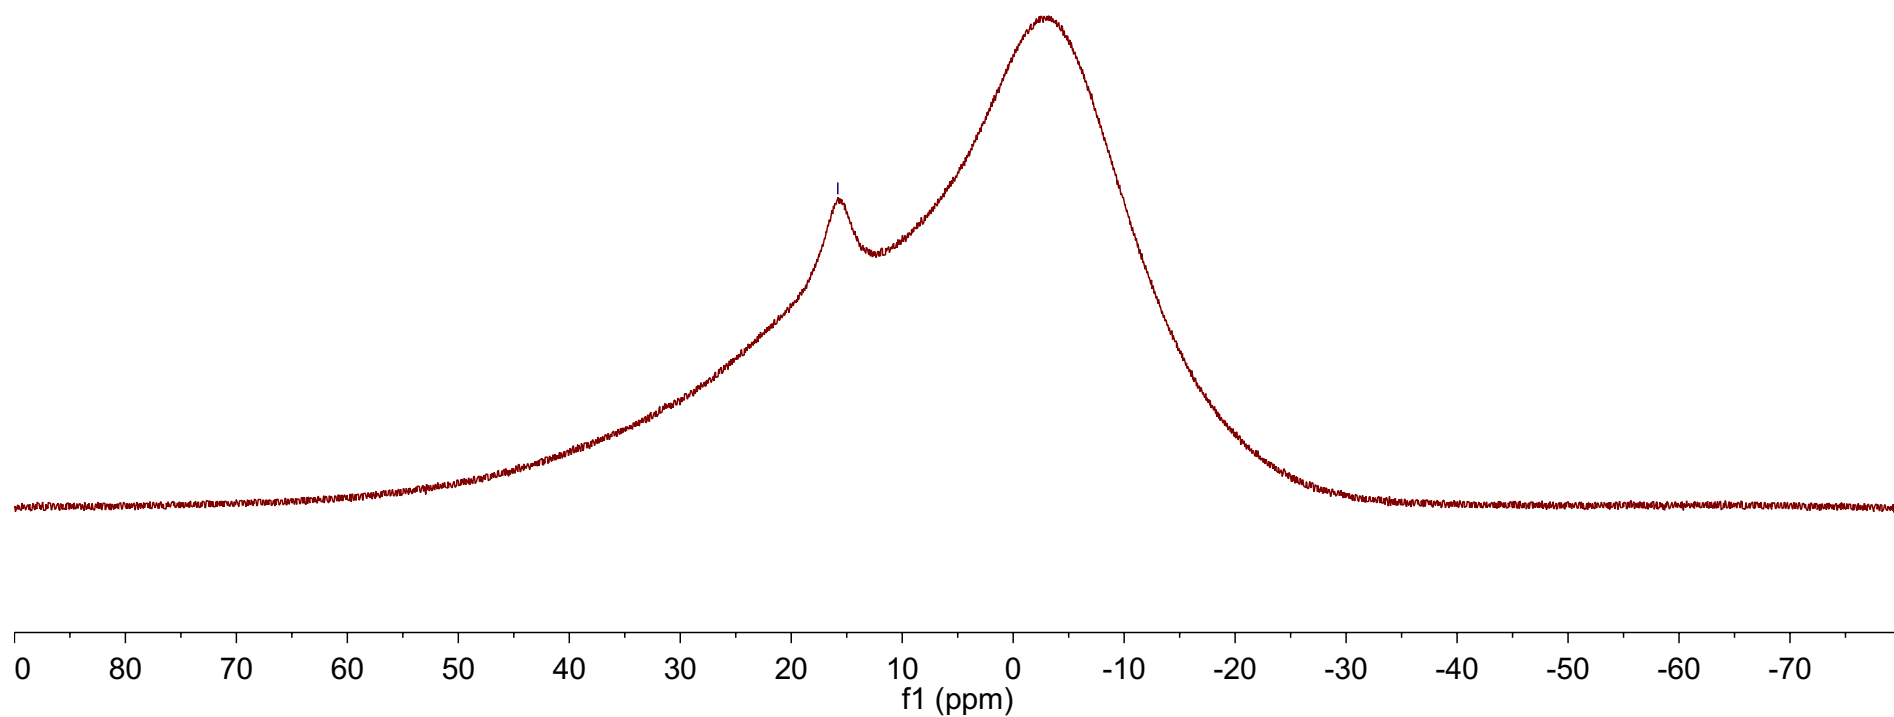

Supplementary Figure 61: <sup>11</sup>B NMR (160 MHz, CDCl<sub>3</sub>) spectrum of **4b**.

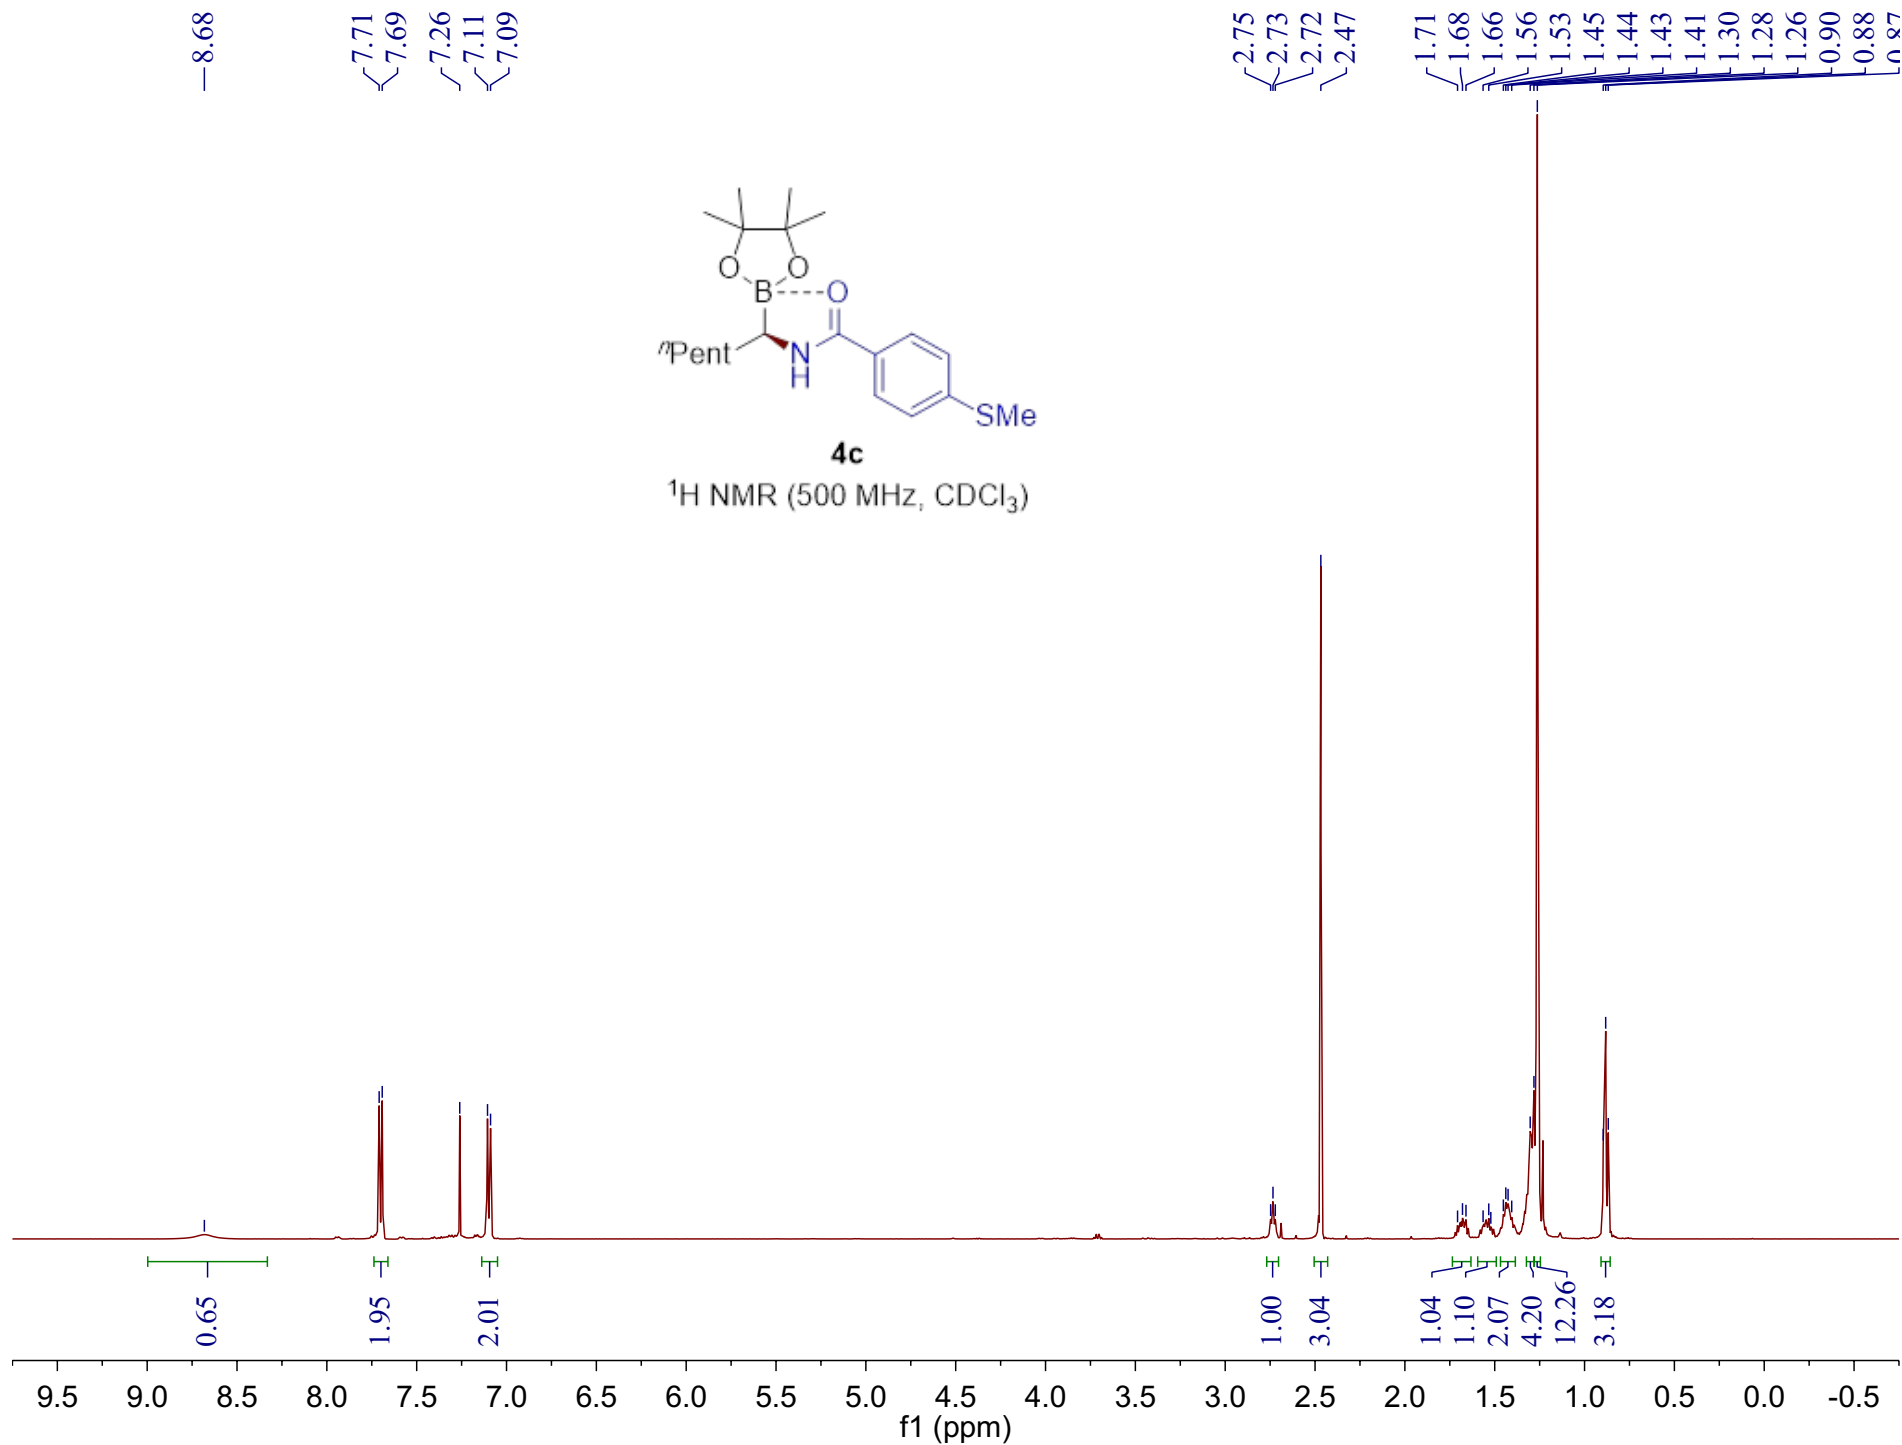

Supplementary Figure 62: <sup>1</sup>H NMR (500 MHz, CDCl<sub>3</sub>) spectrum of **4c**.

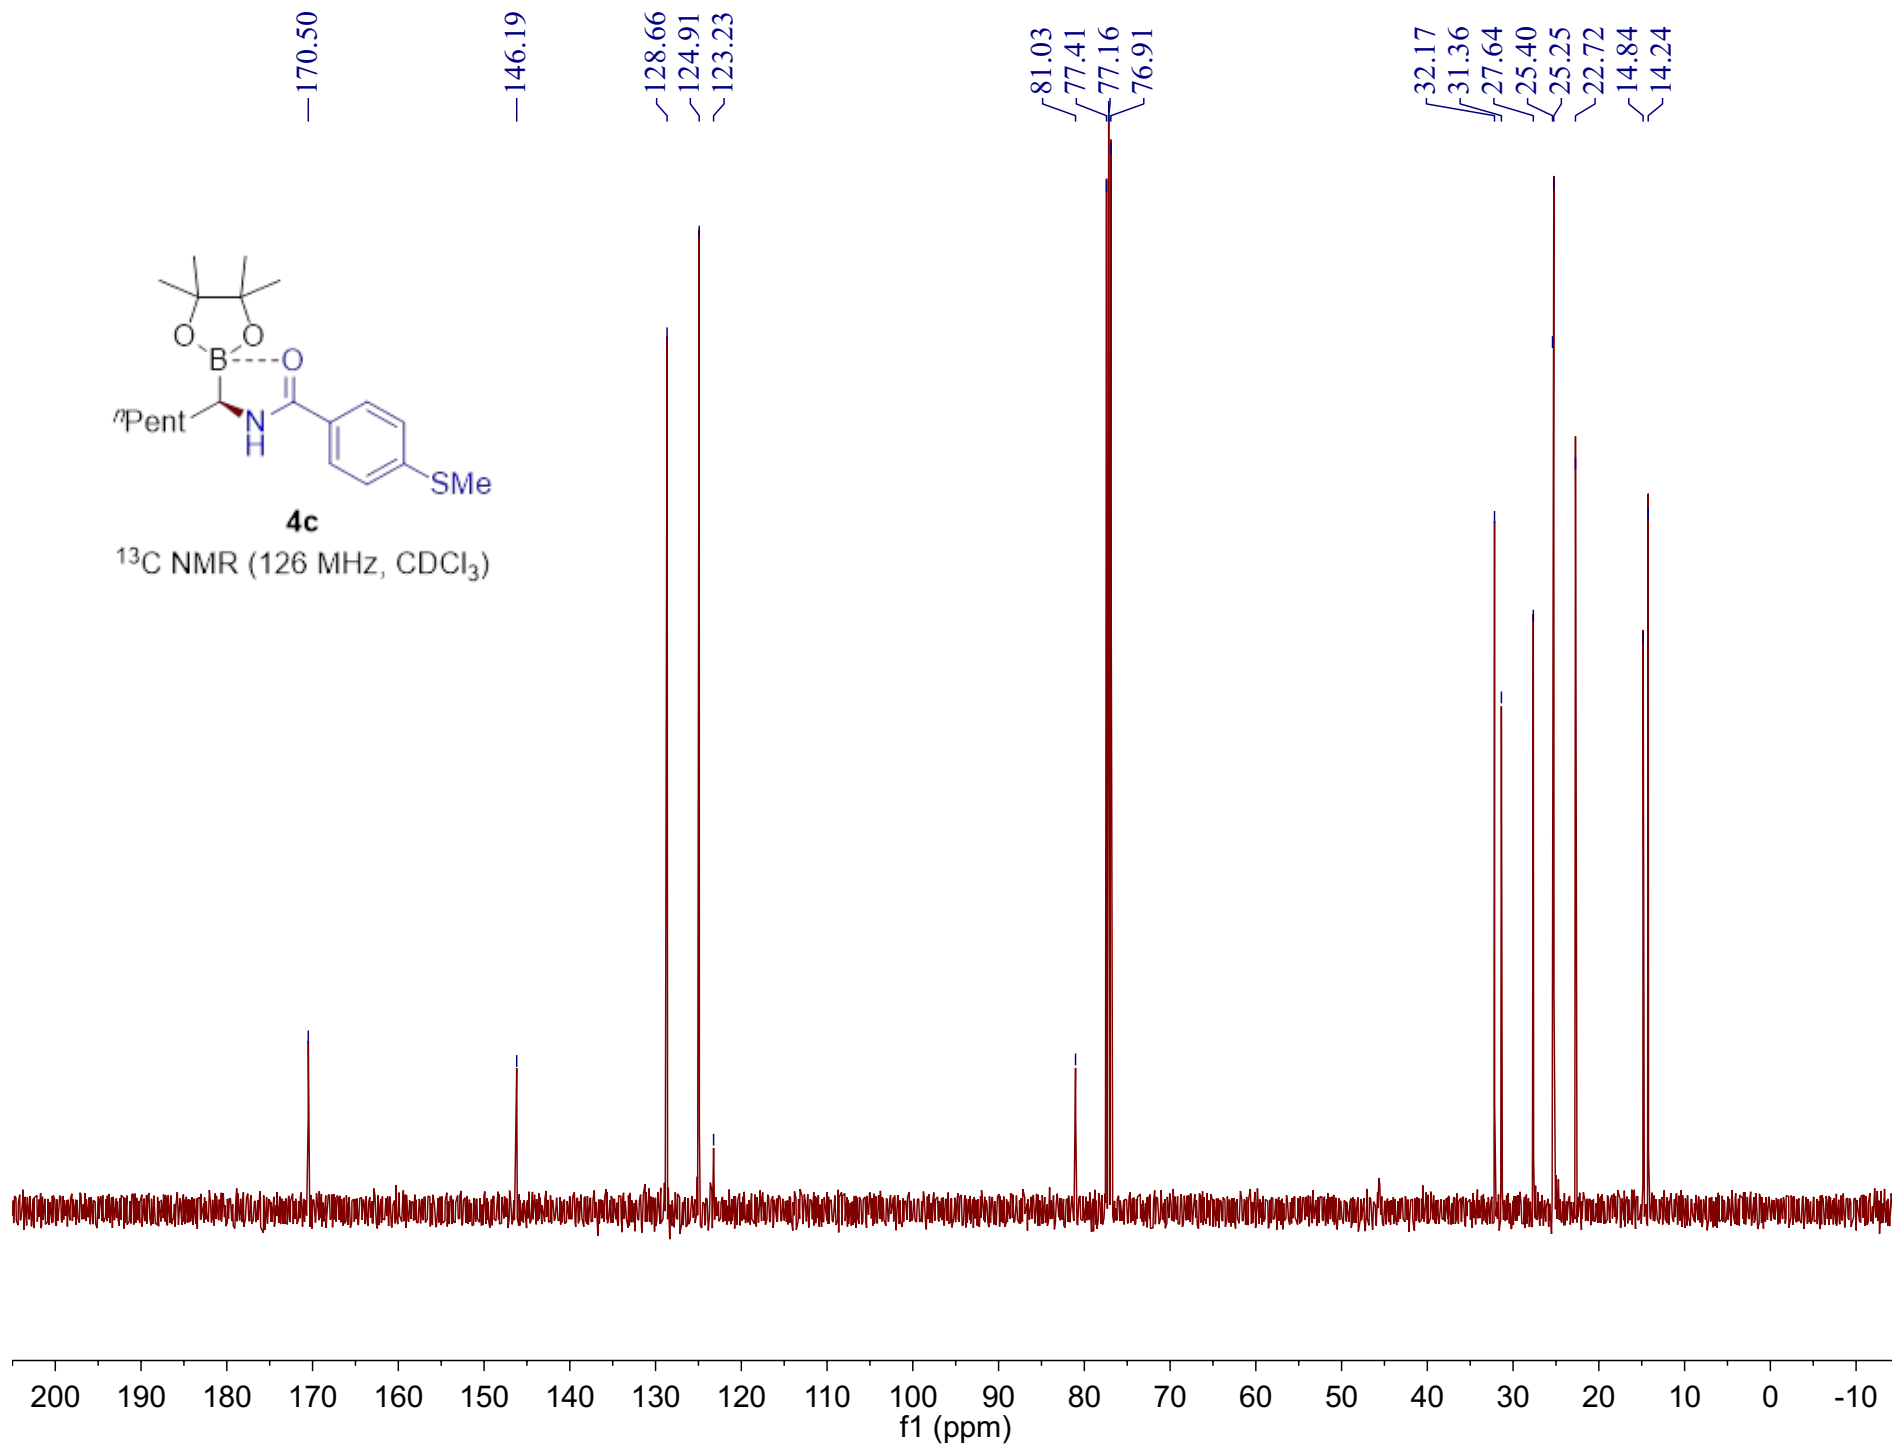

Supplementary Figure 63: <sup>13</sup>C NMR (126 MHz, CDCl<sub>3</sub>) spectrum of **4c**.

—16.57

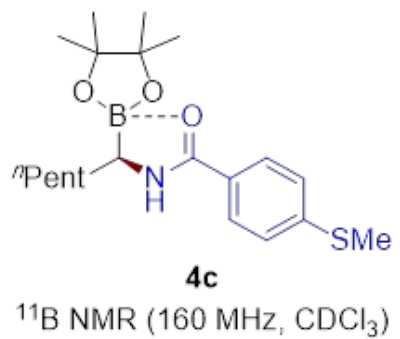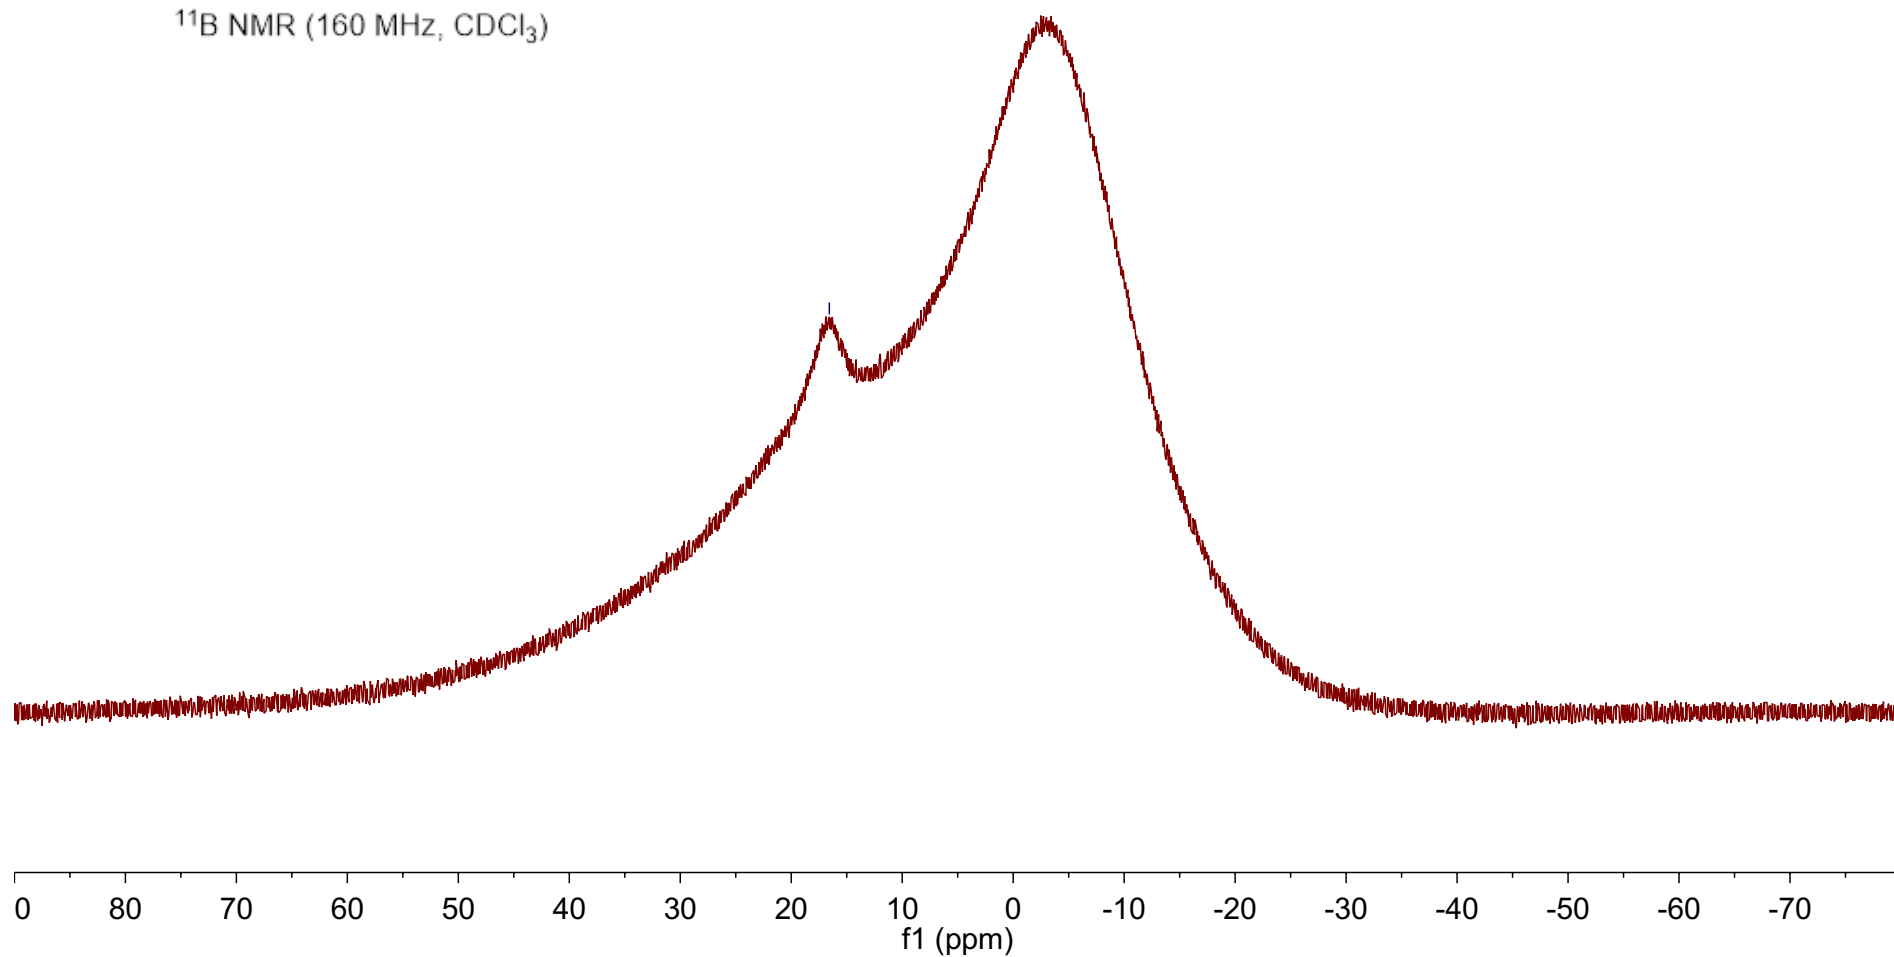

Supplementary Figure 64: <sup>11</sup>B NMR (160 MHz, CDCl<sub>3</sub>) spectrum of 4c.



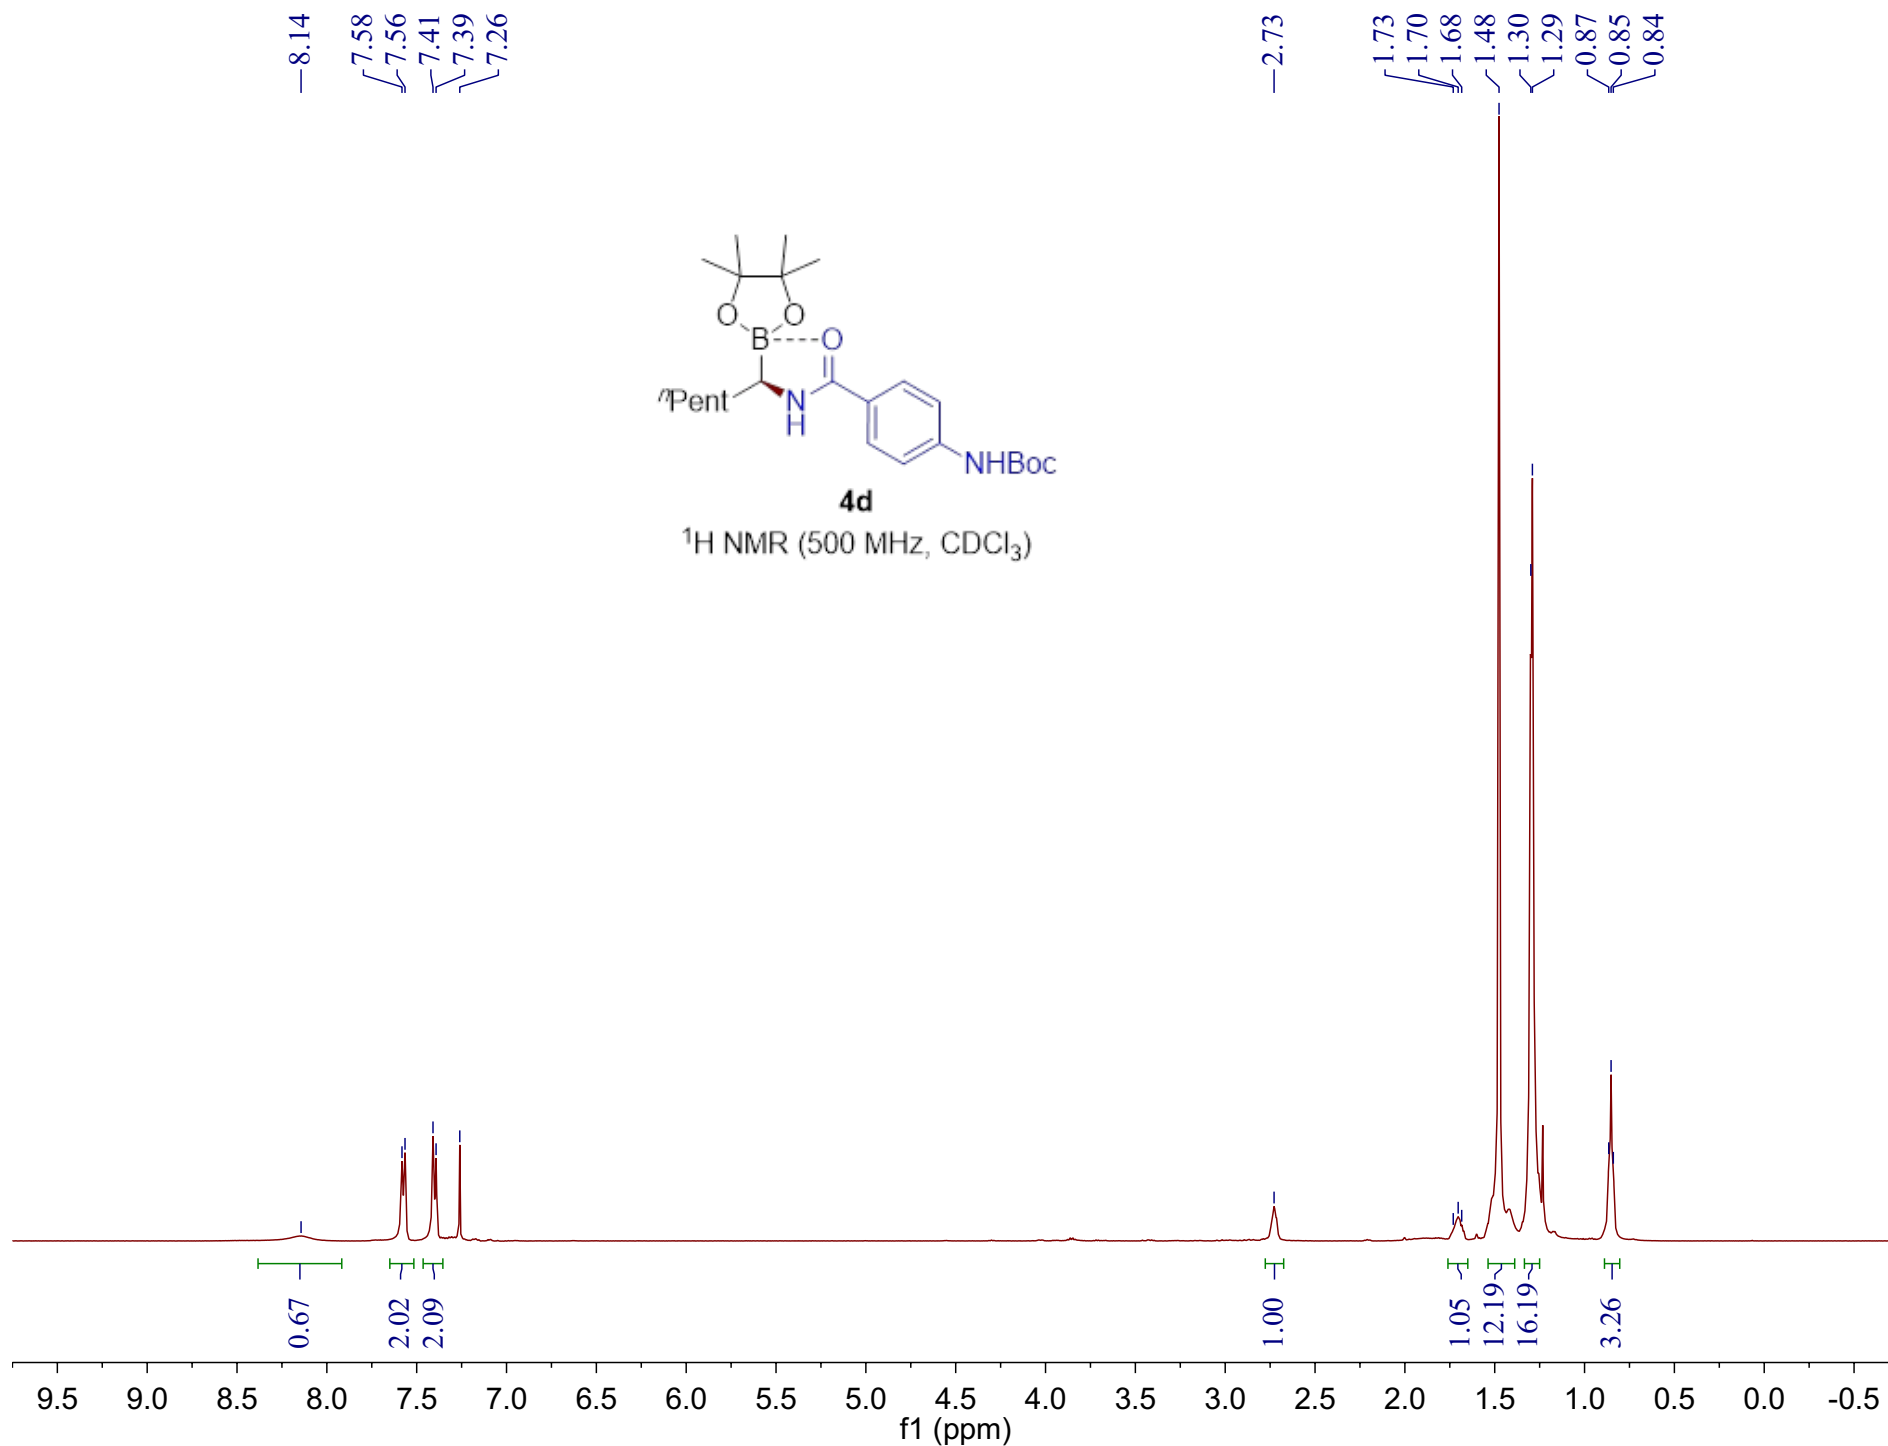

Supplementary Figure 65: <sup>1</sup>H NMR (500 MHz, CDCl<sub>3</sub>) spectrum of **4d**.

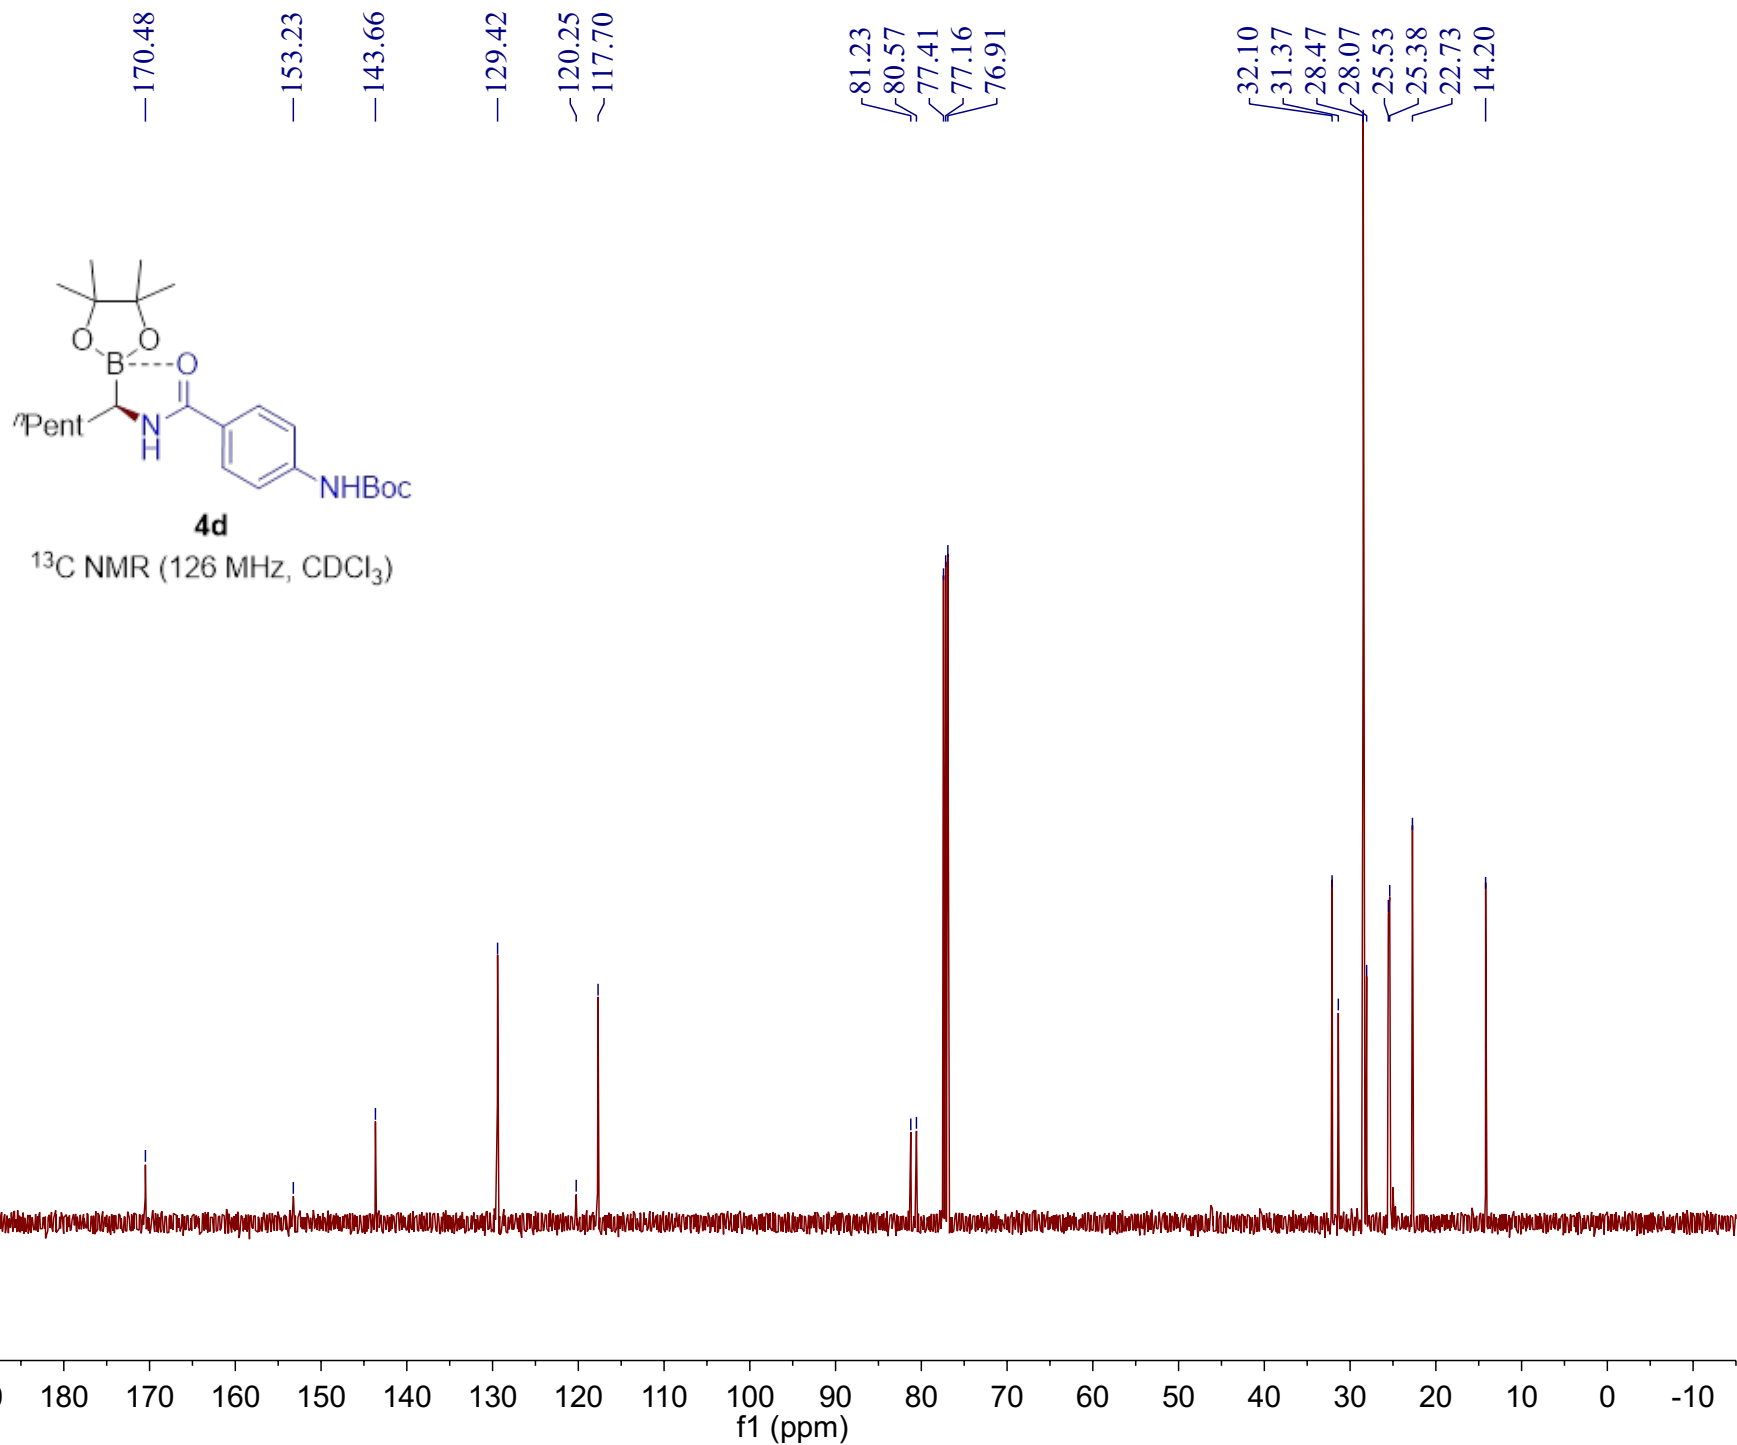

**Supplementary Figure 66:** <sup>13</sup>C NMR (126 MHz, CDCl<sub>3</sub>) spectrum of **4d**.

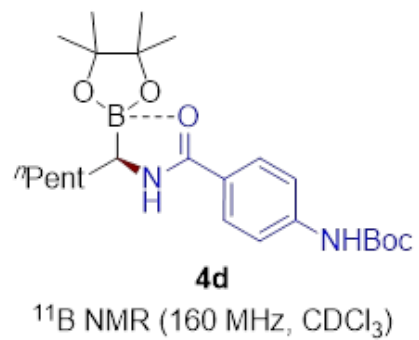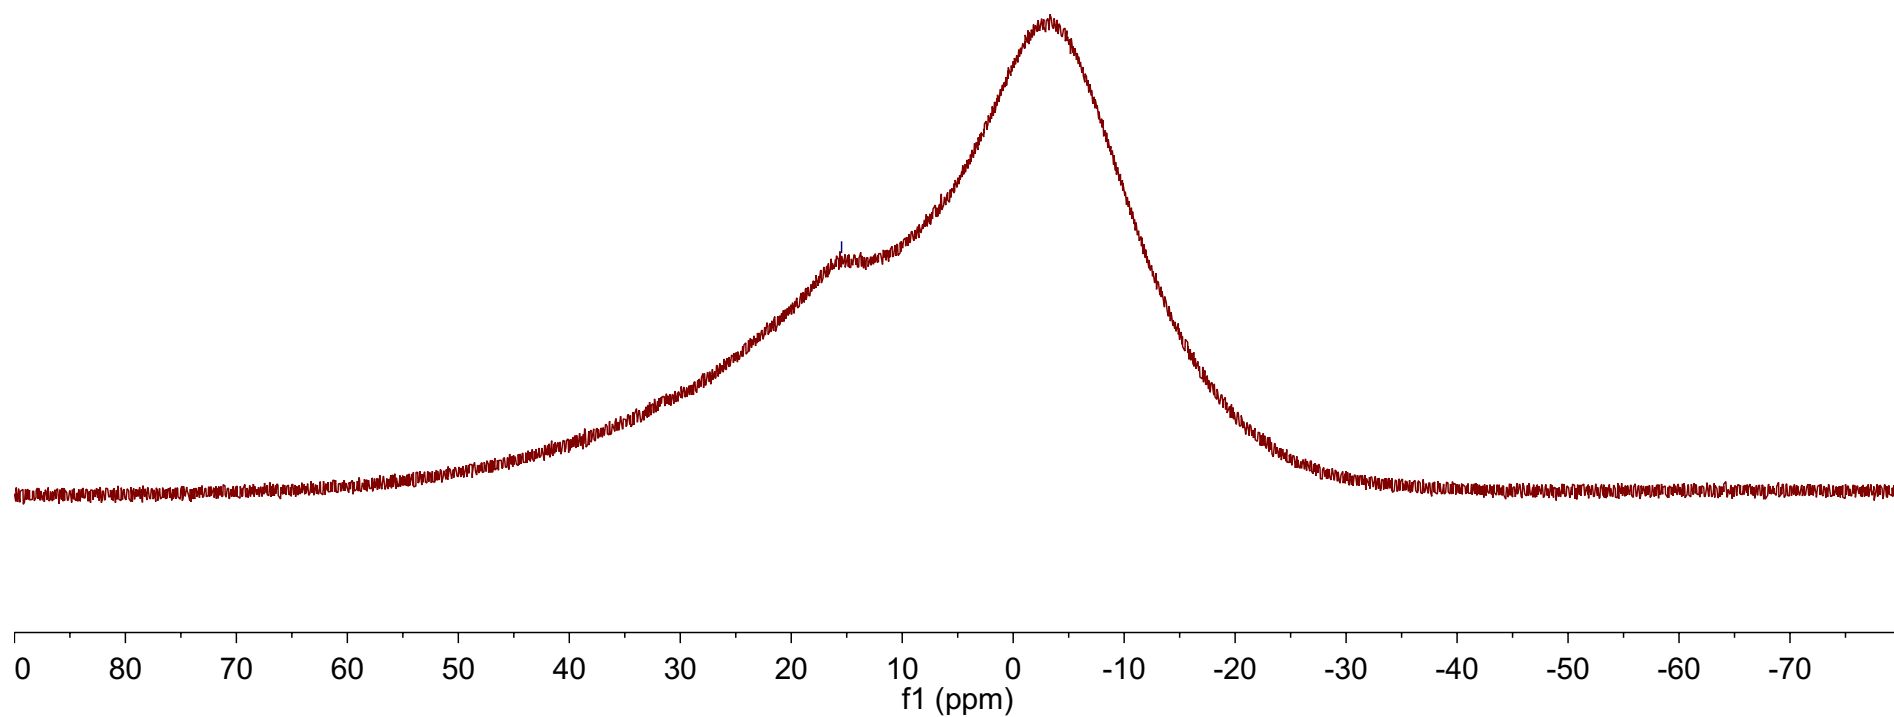

Supplementary Figure 67: <sup>11</sup>B NMR (160 MHz, CDCl<sub>3</sub>) spectrum of **4d**.

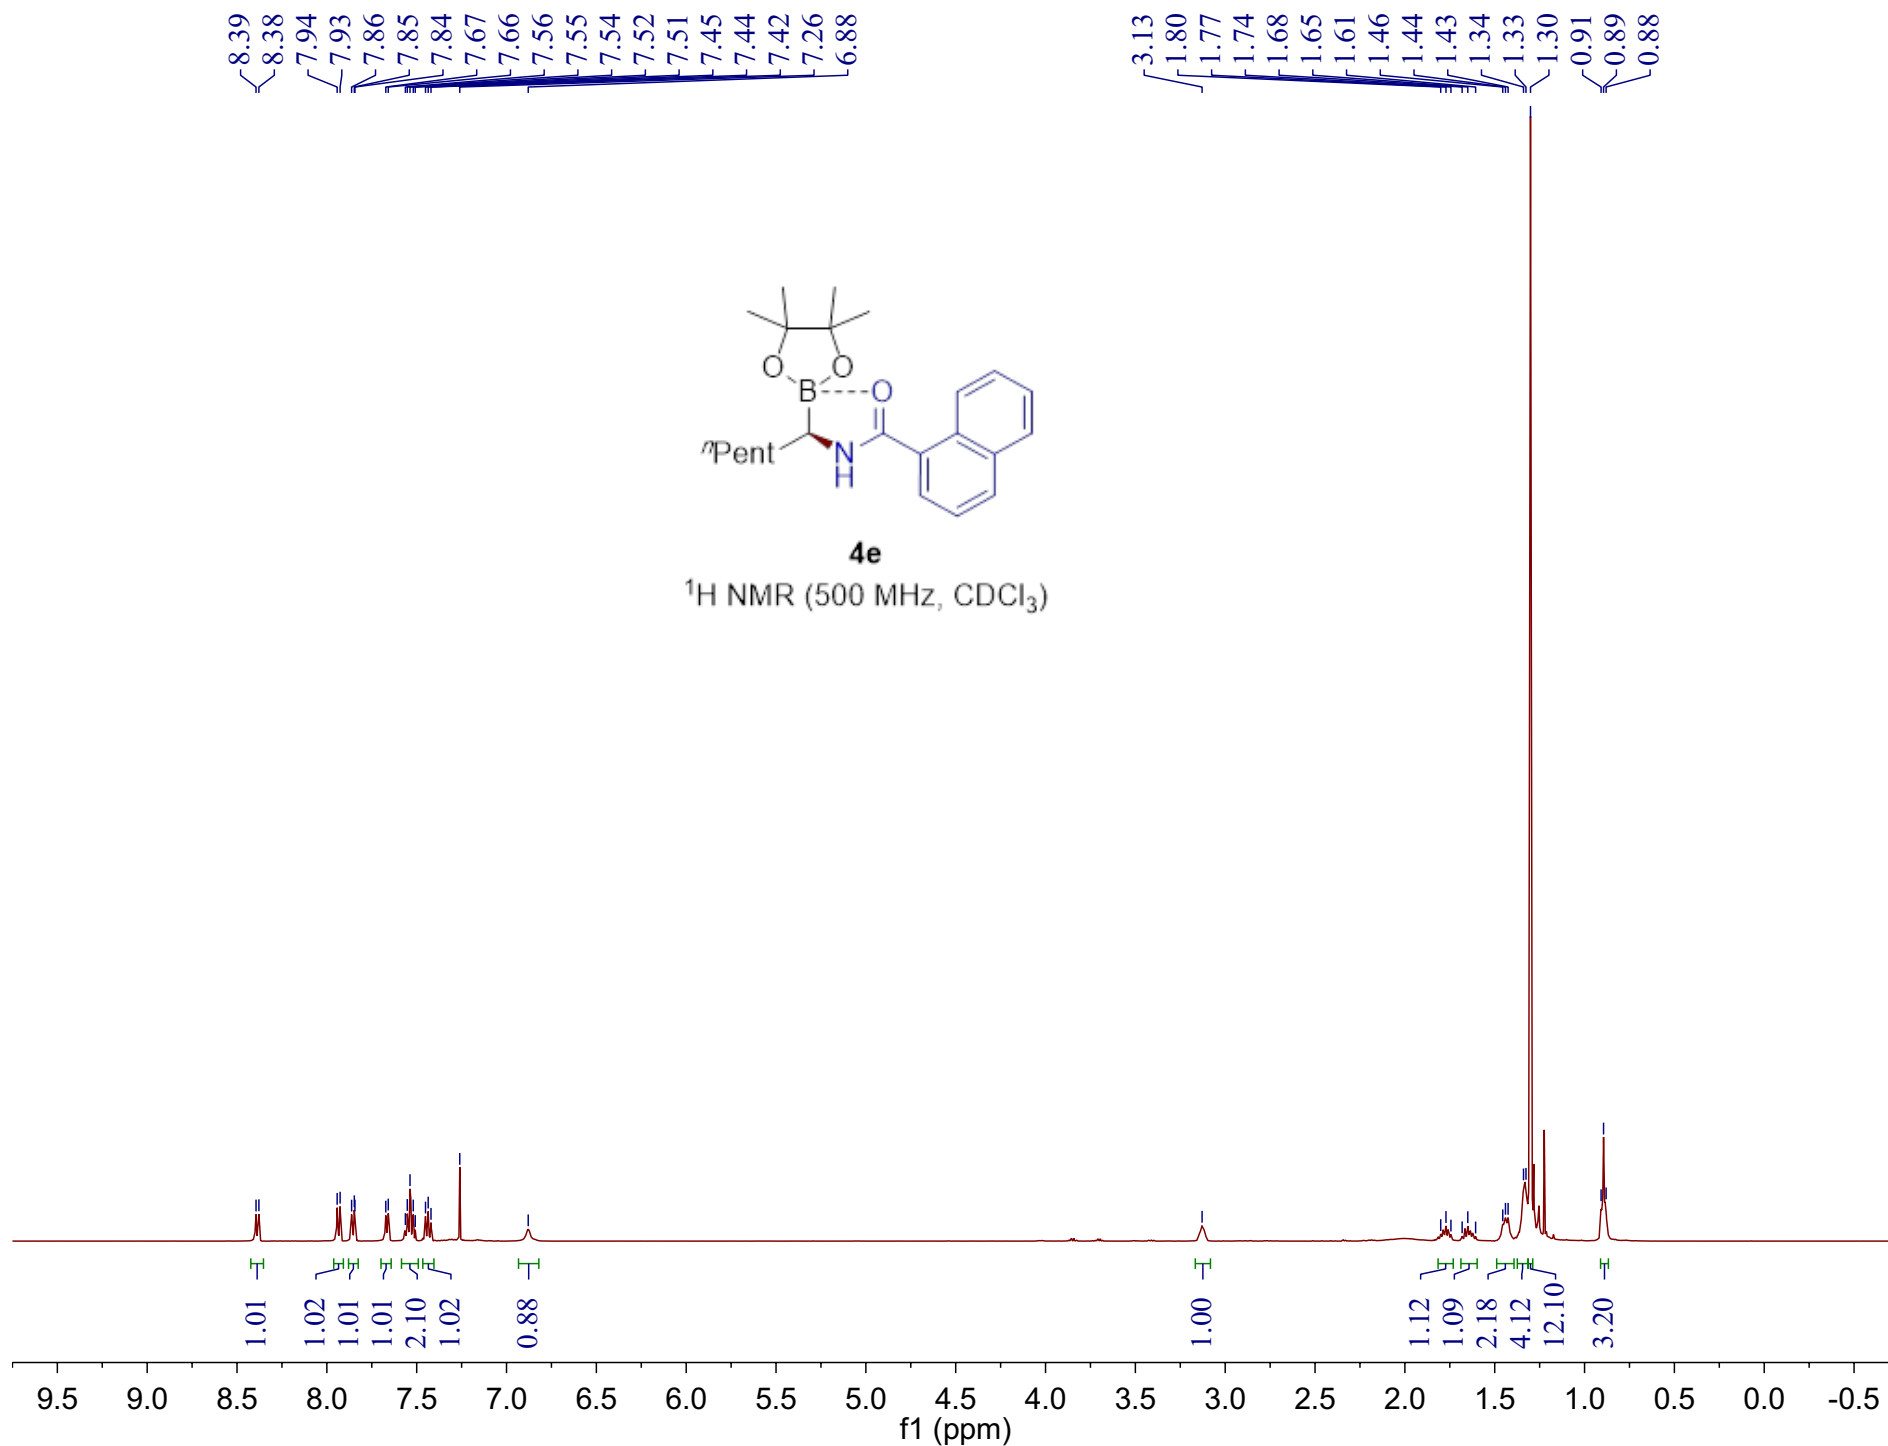

Supplementary Figure 68: <sup>1</sup>H NMR (500 MHz, CDCl<sub>3</sub>) spectrum of **4e**.

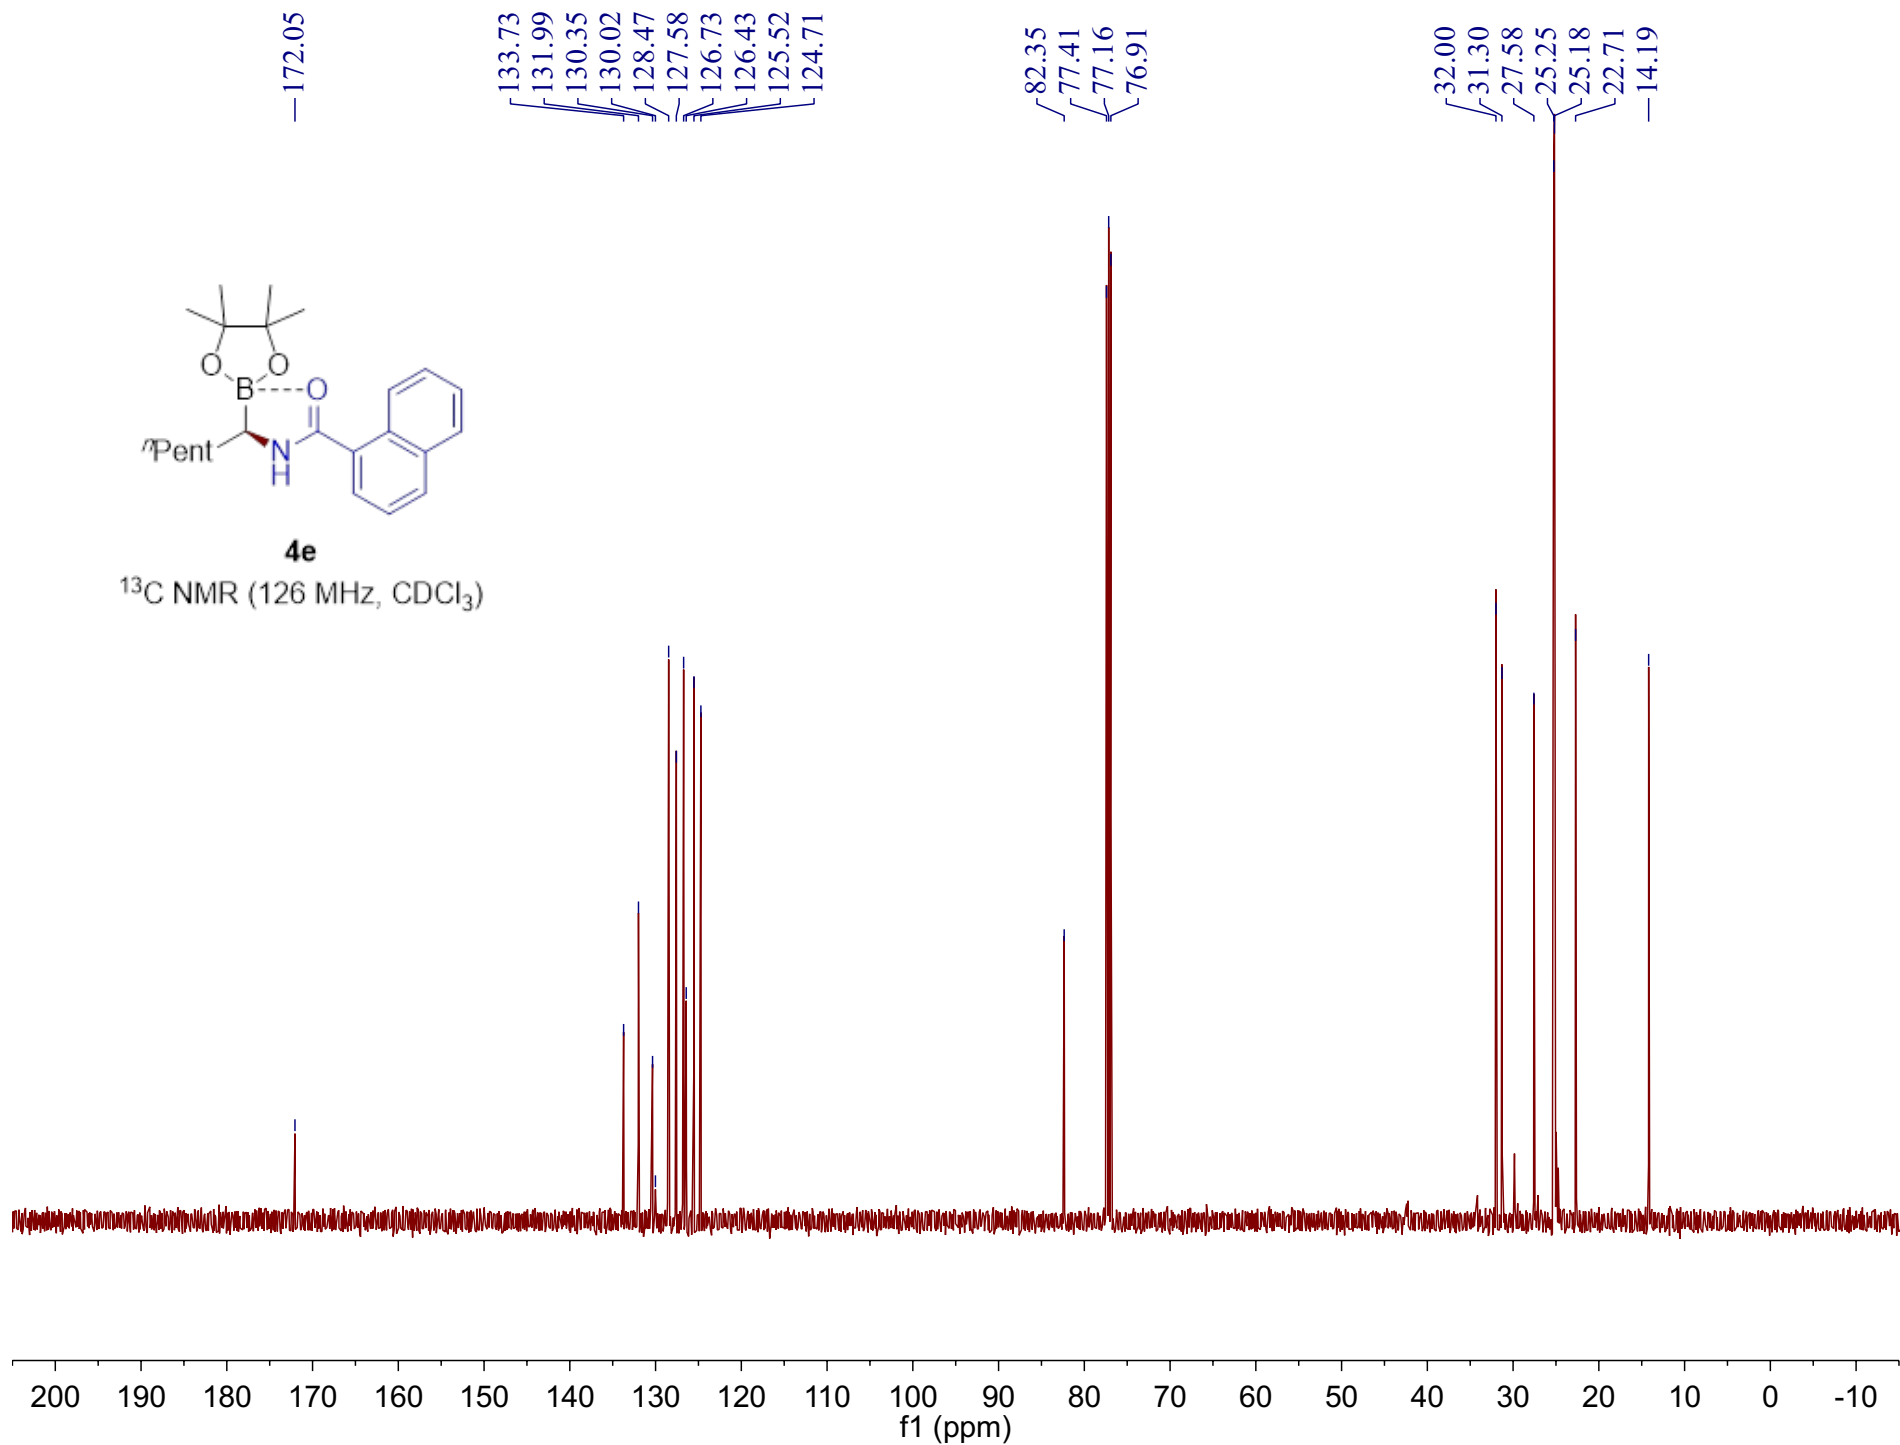

Supplementary Figure 69: <sup>13</sup>C NMR (126 MHz, CDCl<sub>3</sub>) spectrum of **4e**.

—23.92

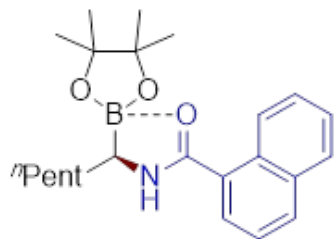

**4e**

$^{11}\text{B}$  NMR (160 MHz,  $\text{CDCl}_3$ )

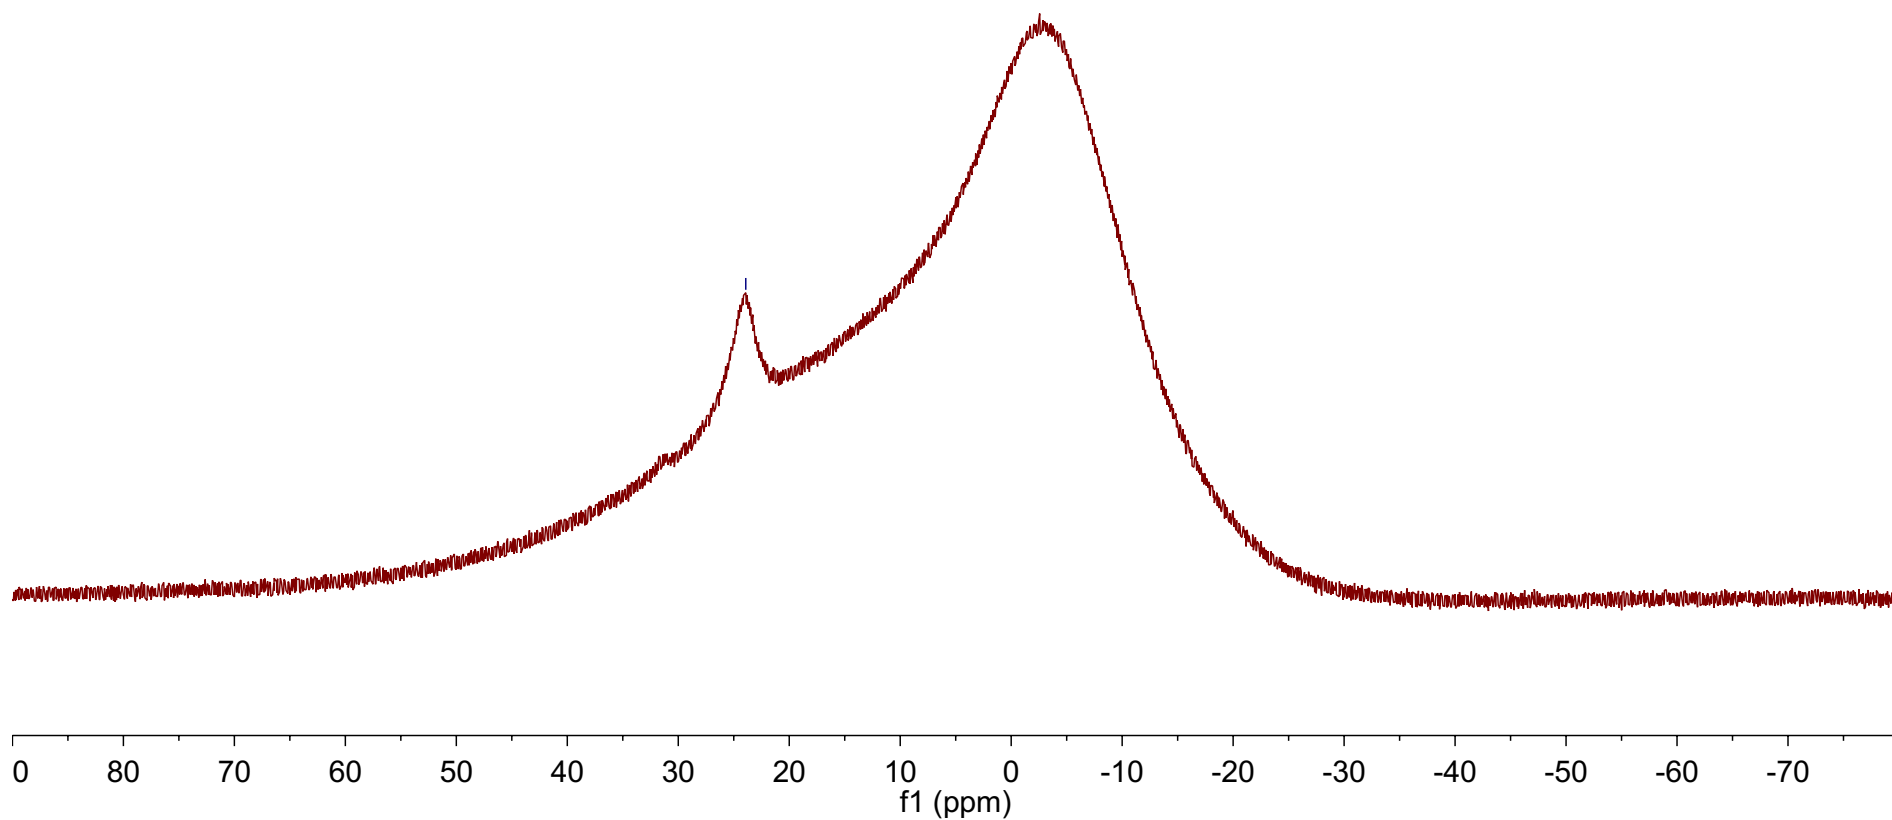

**Supplementary Figure 70:**  $^{11}\text{B}$  NMR (160 MHz,  $\text{CDCl}_3$ ) spectrum of **4e**.

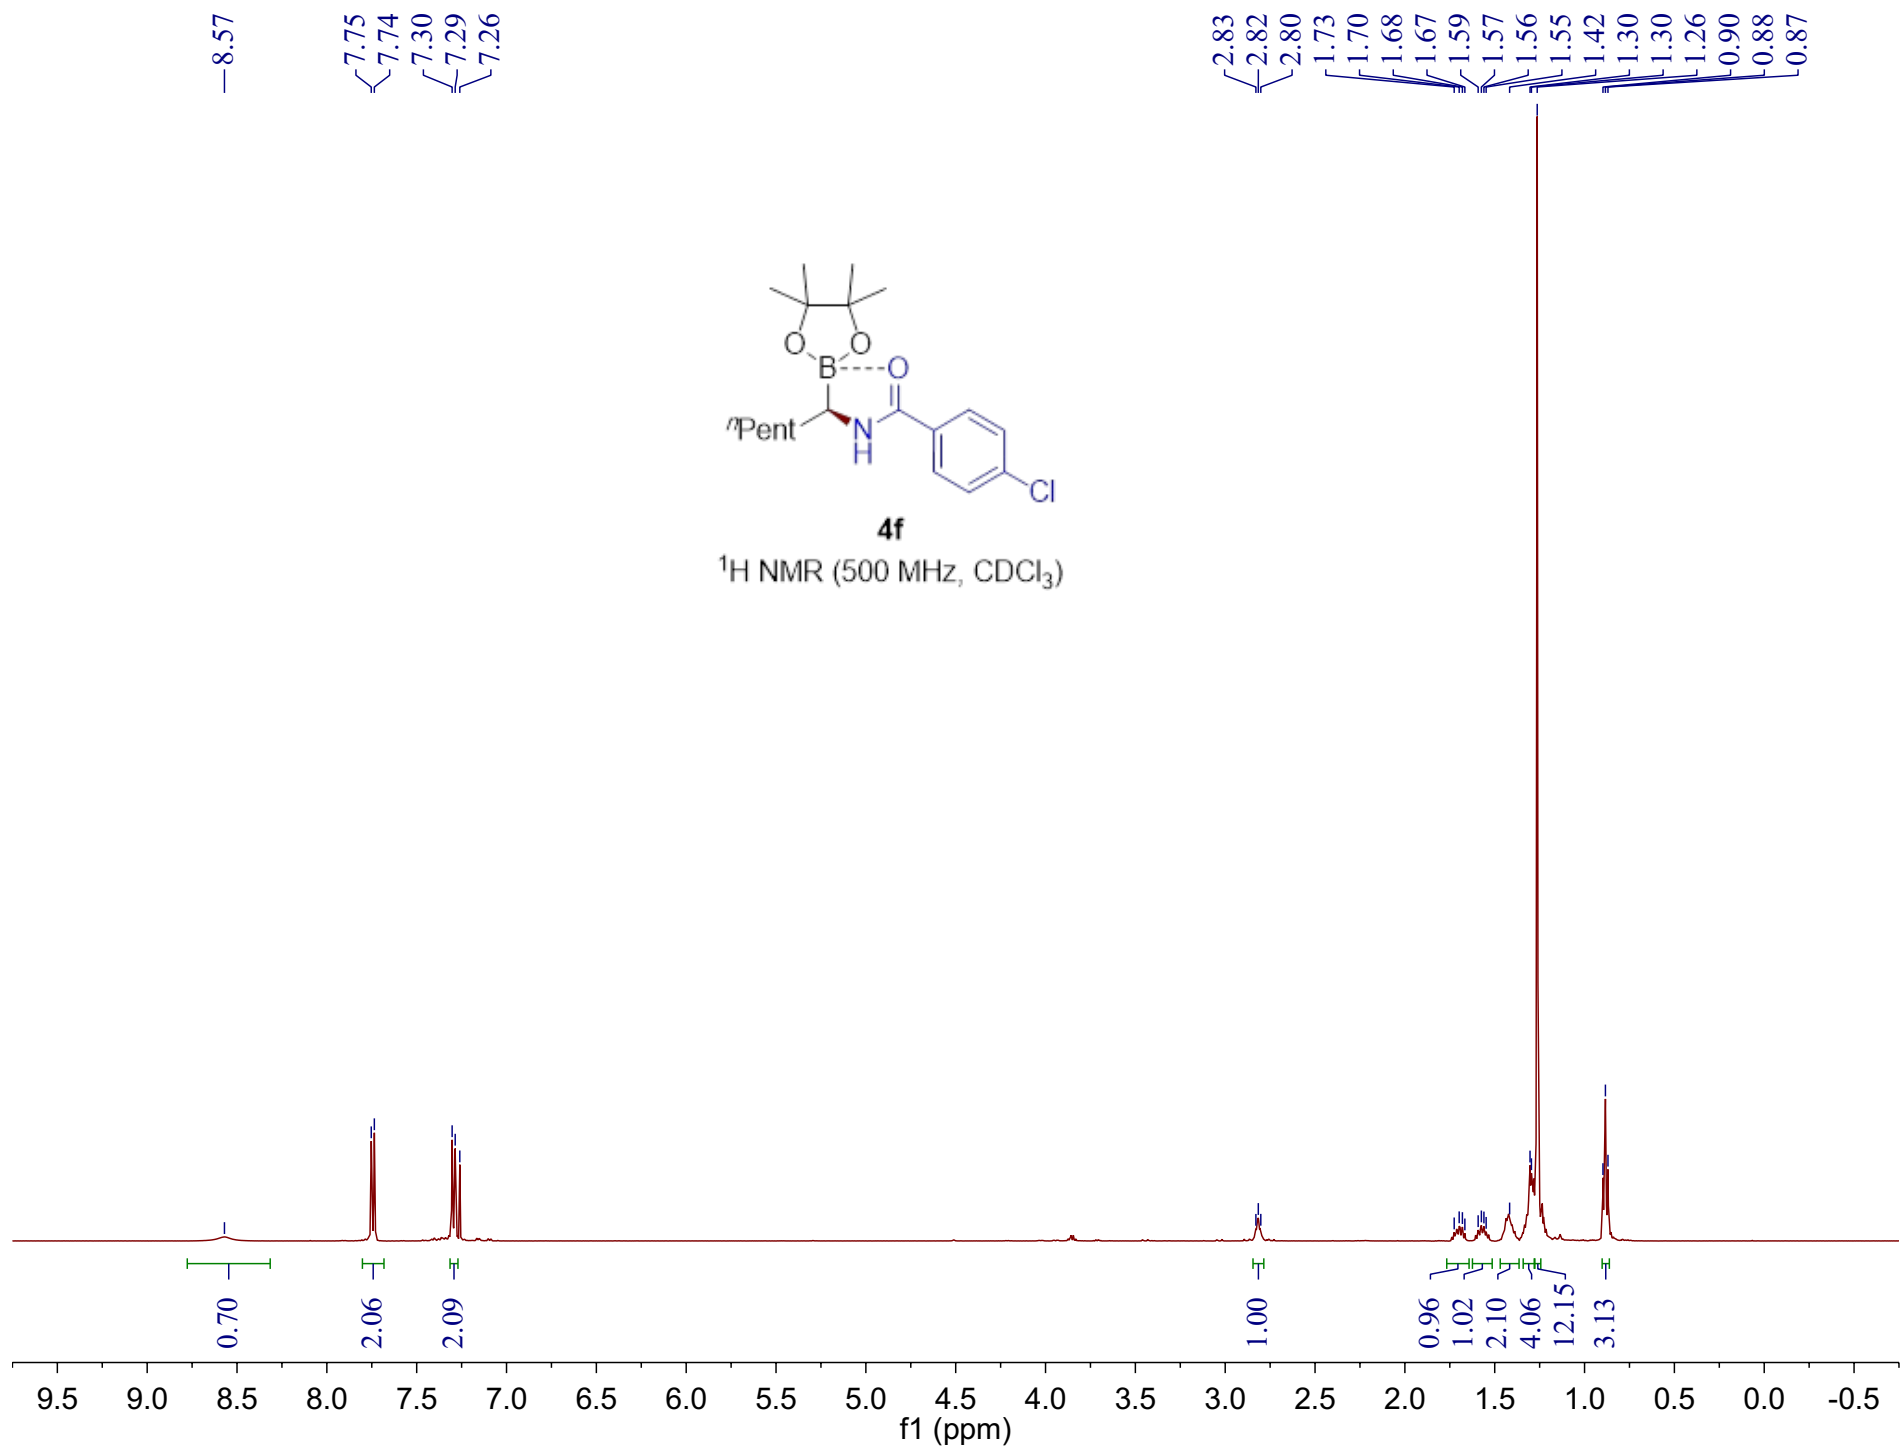

Supplementary Figure 71: <sup>1</sup>H NMR (500 MHz, CDCl<sub>3</sub>) spectrum of **4f**.

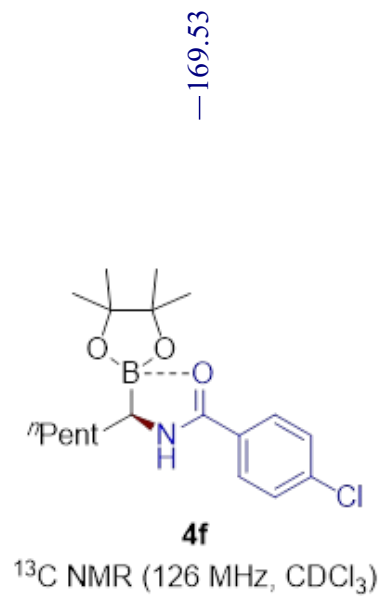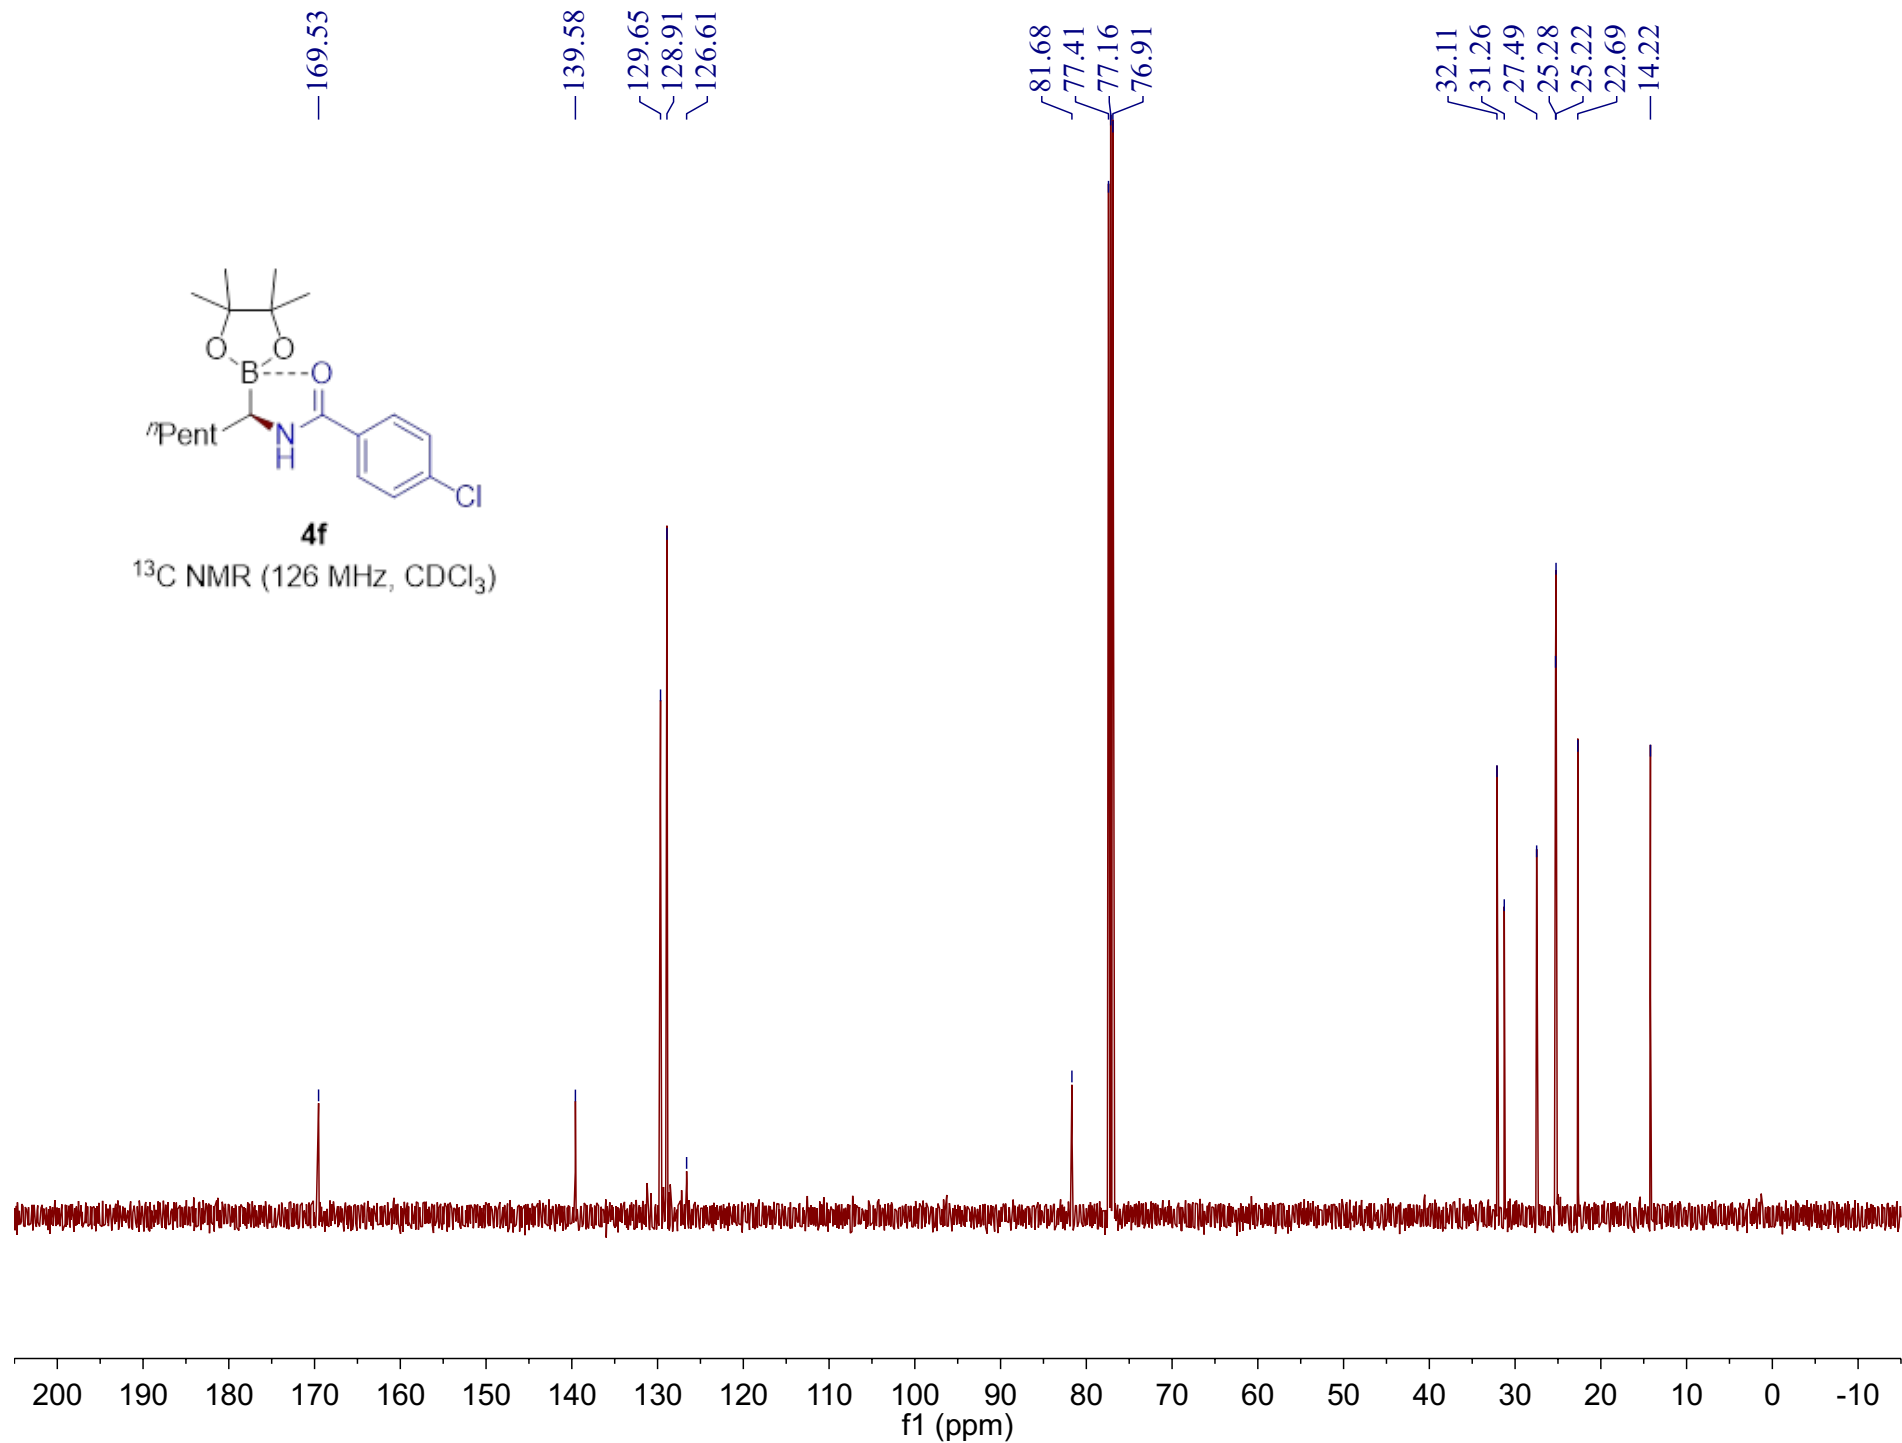

Supplementary Figure 72: <sup>13</sup>C NMR (126 MHz, CDCl<sub>3</sub>) spectrum of **4f**.



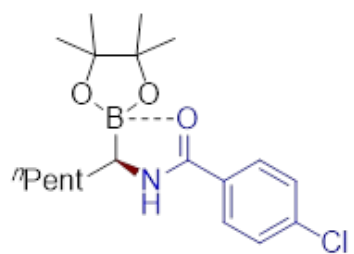

**4f**

<sup>11</sup>B NMR (160 MHz, CDCl<sub>3</sub>)

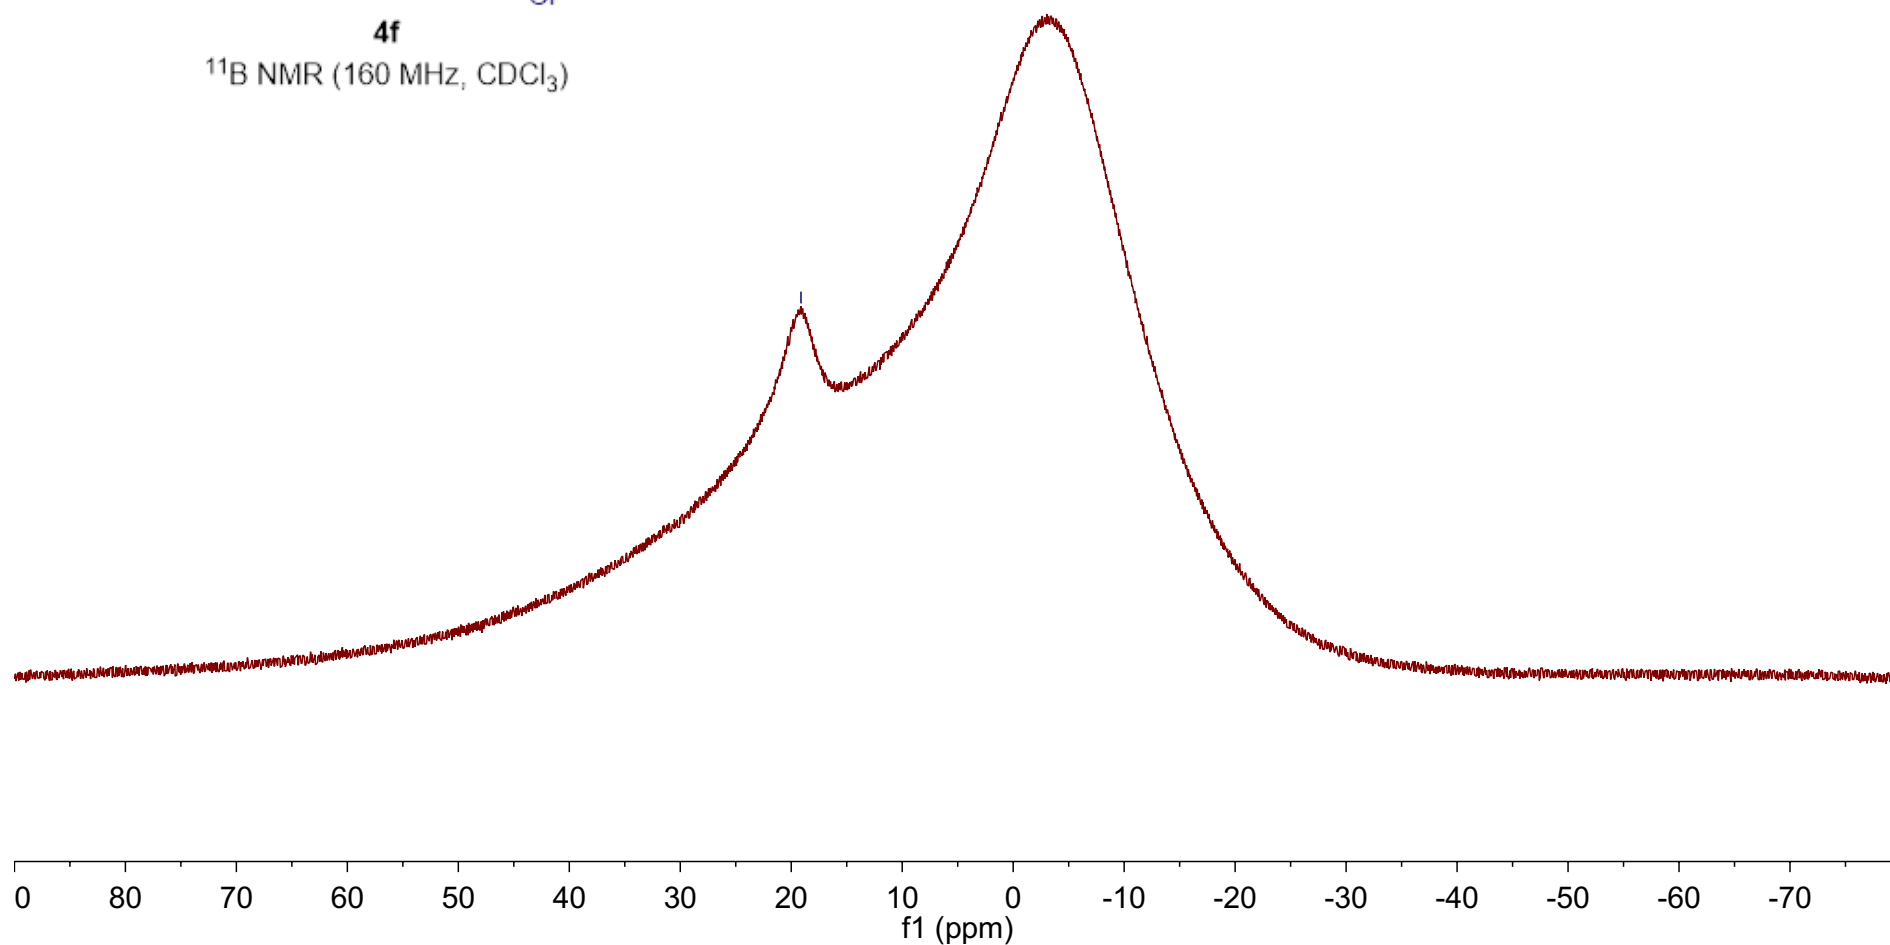

Supplementary Figure 73: <sup>11</sup>B NMR (160 MHz, CDCl<sub>3</sub>) spectrum of **4f**.

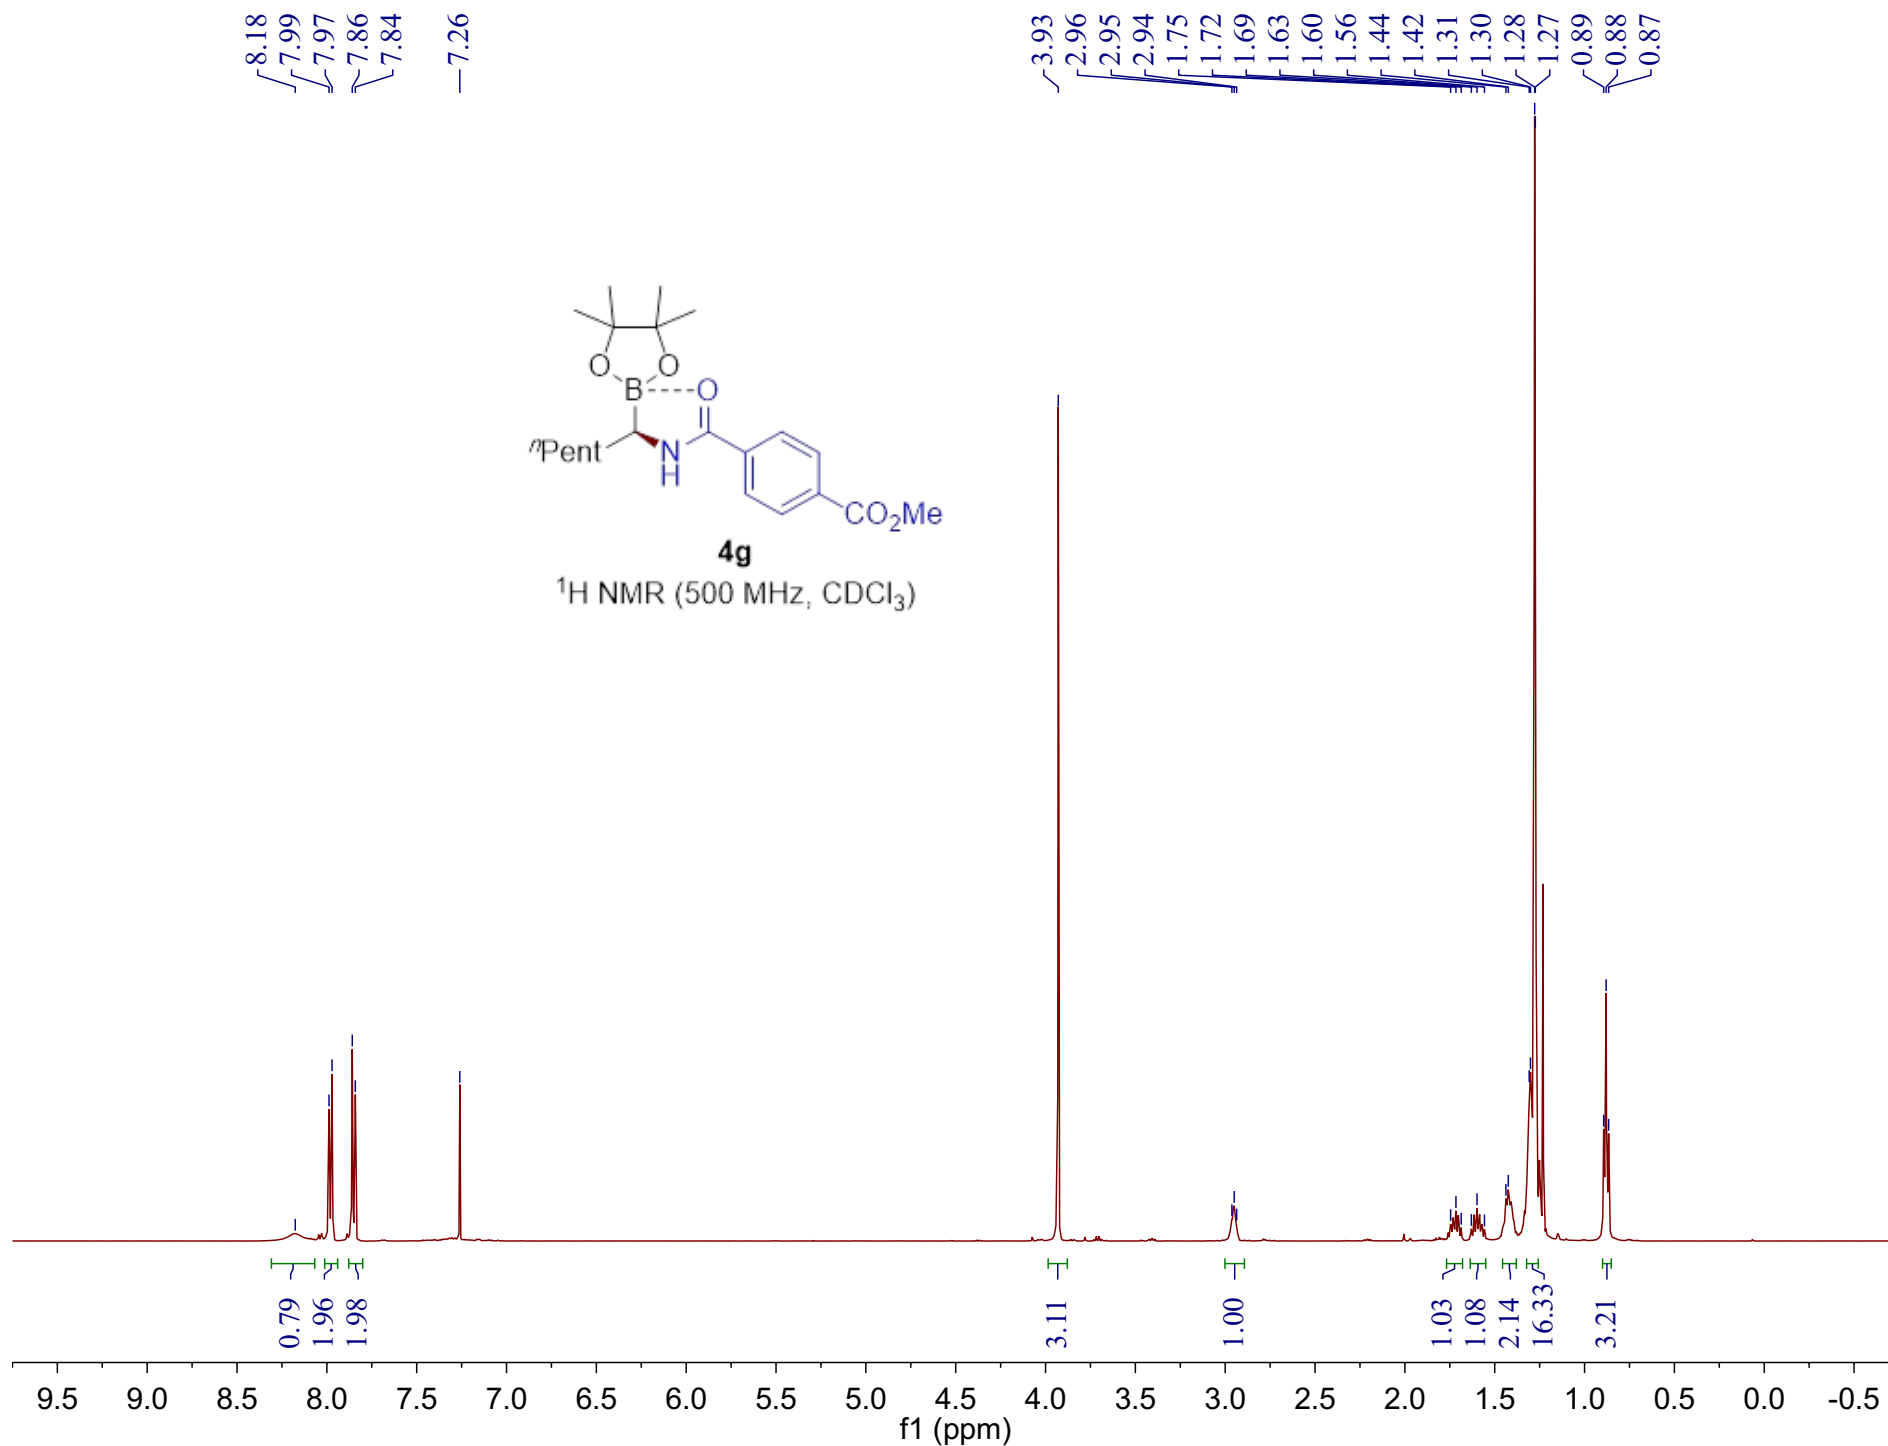

Supplementary Figure 74: <sup>1</sup>H NMR (500 MHz, CDCl<sub>3</sub>) spectrum of **4g**.

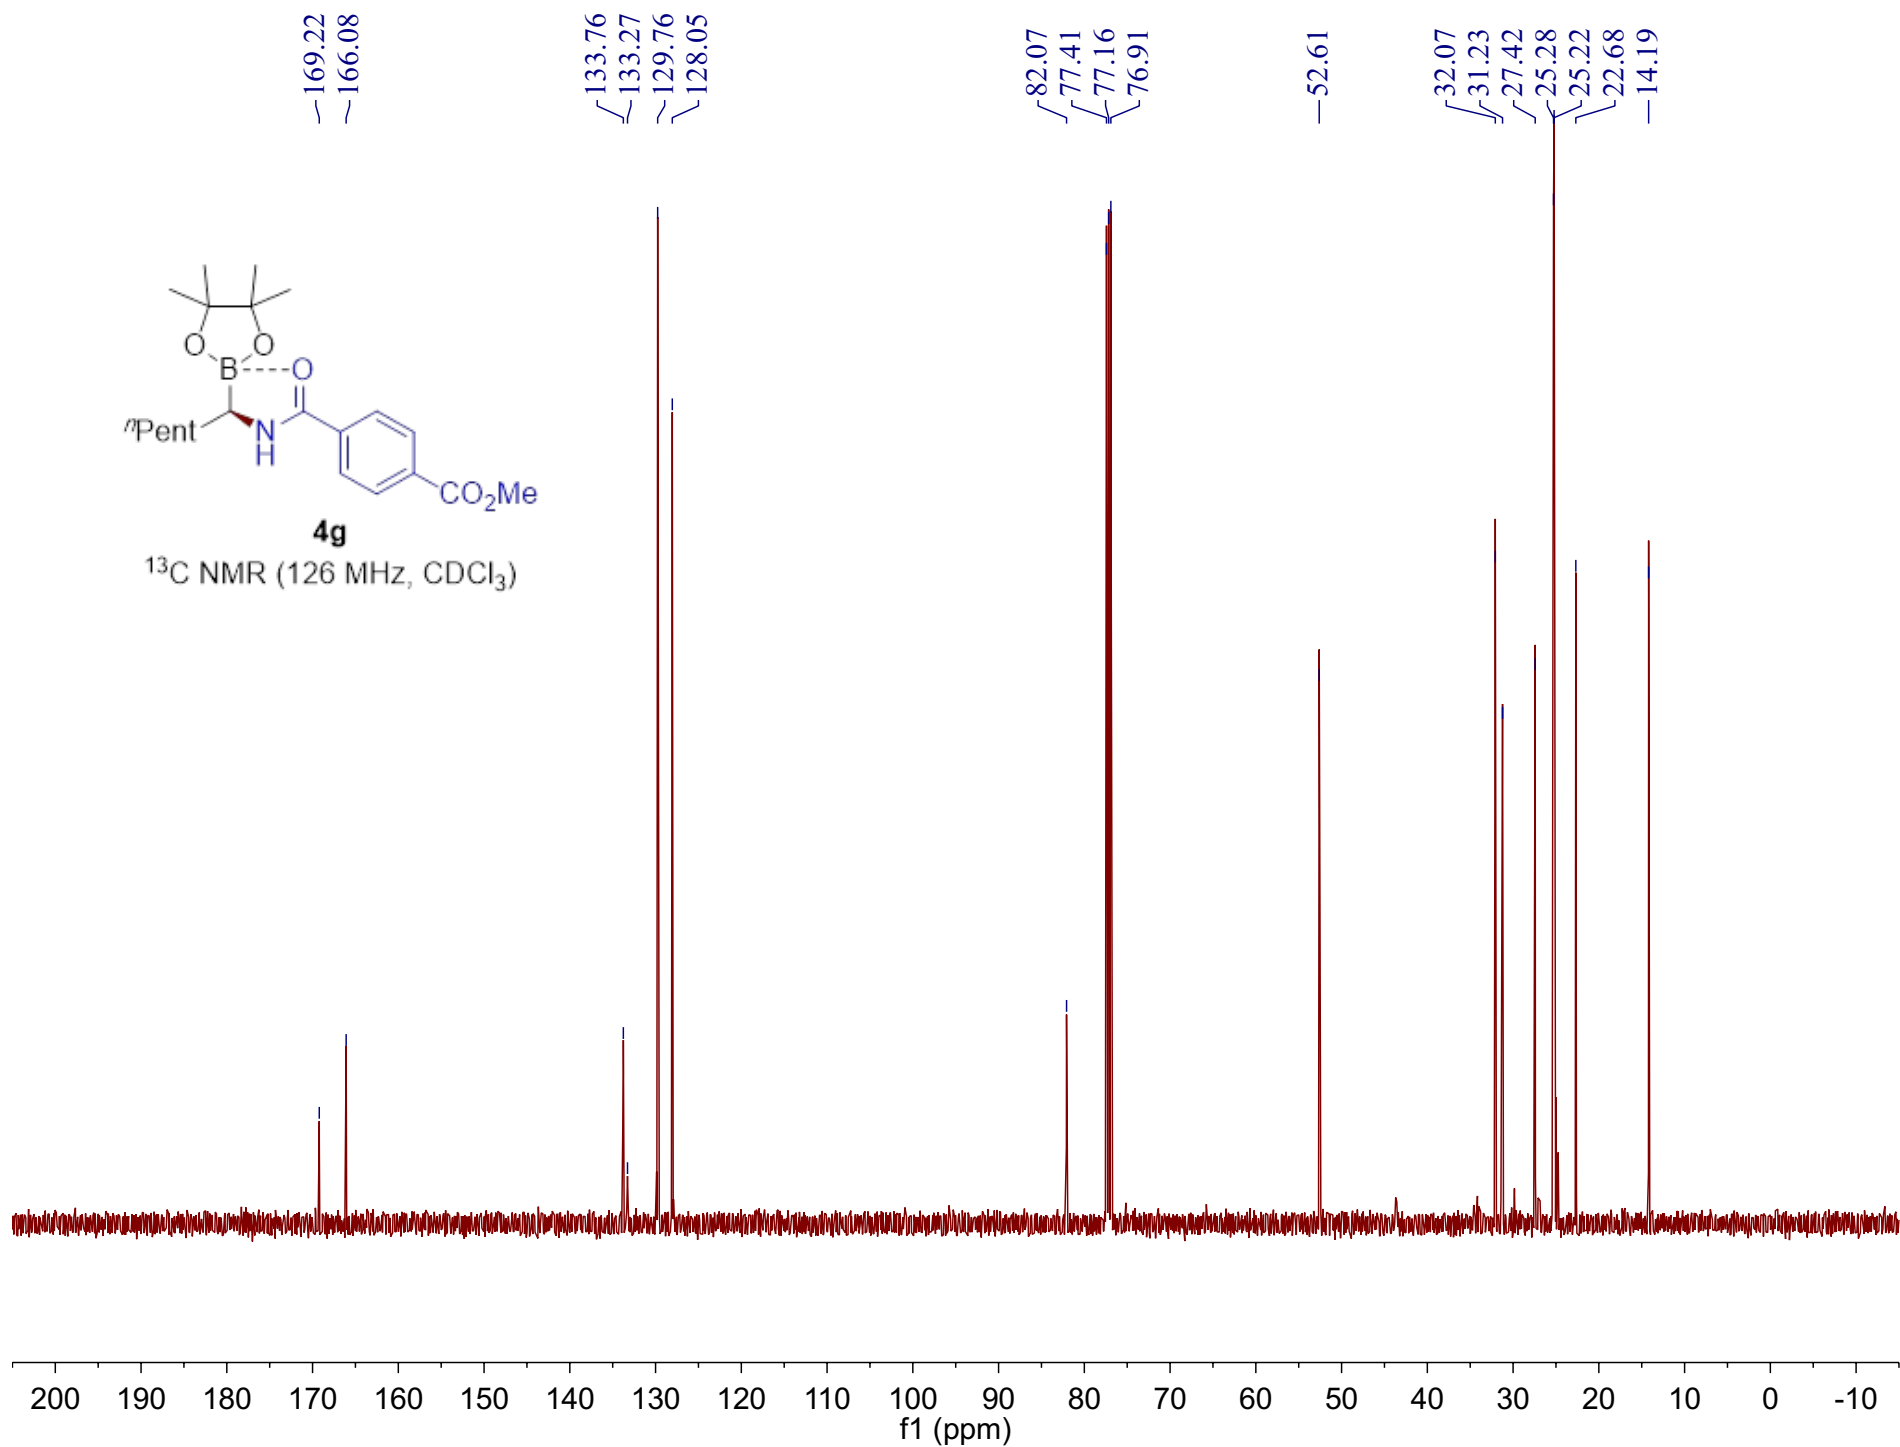

Supplementary Figure 75: <sup>13</sup>C NMR (126 MHz, CDCl<sub>3</sub>) spectrum of **4g**.

-21.75

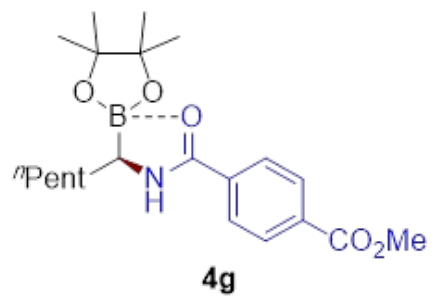

<sup>11</sup>B NMR (160 MHz, CDCl<sub>3</sub>)

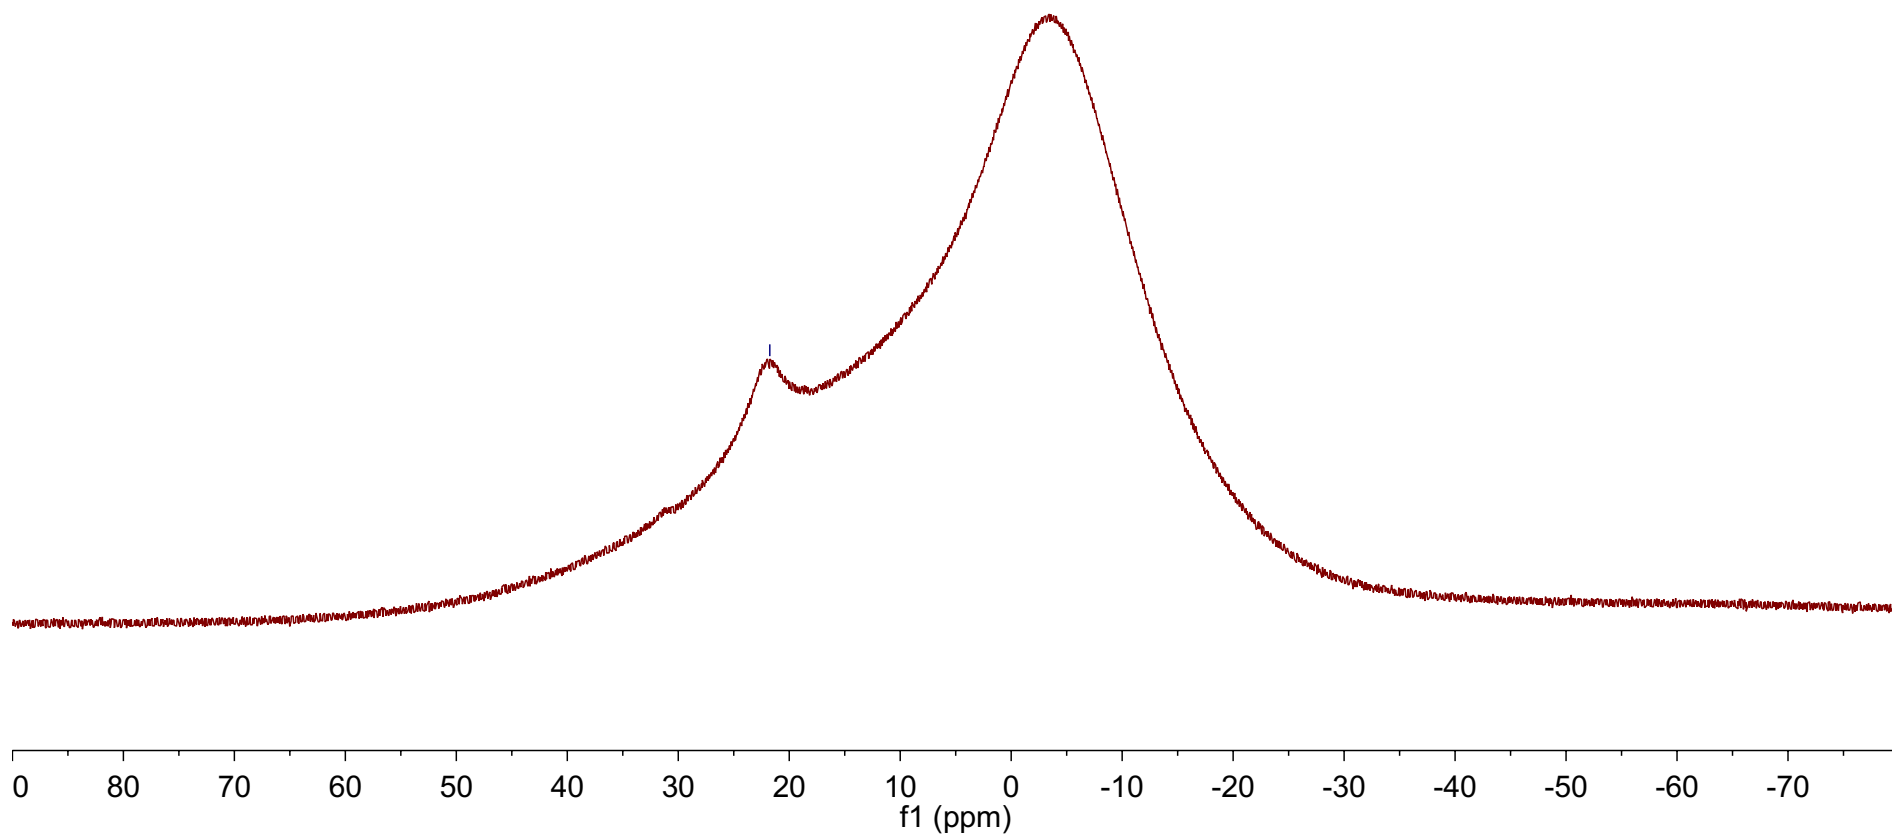

Supplementary Figure 76: <sup>11</sup>B NMR (160 MHz, CDCl<sub>3</sub>) spectrum of **4g**.

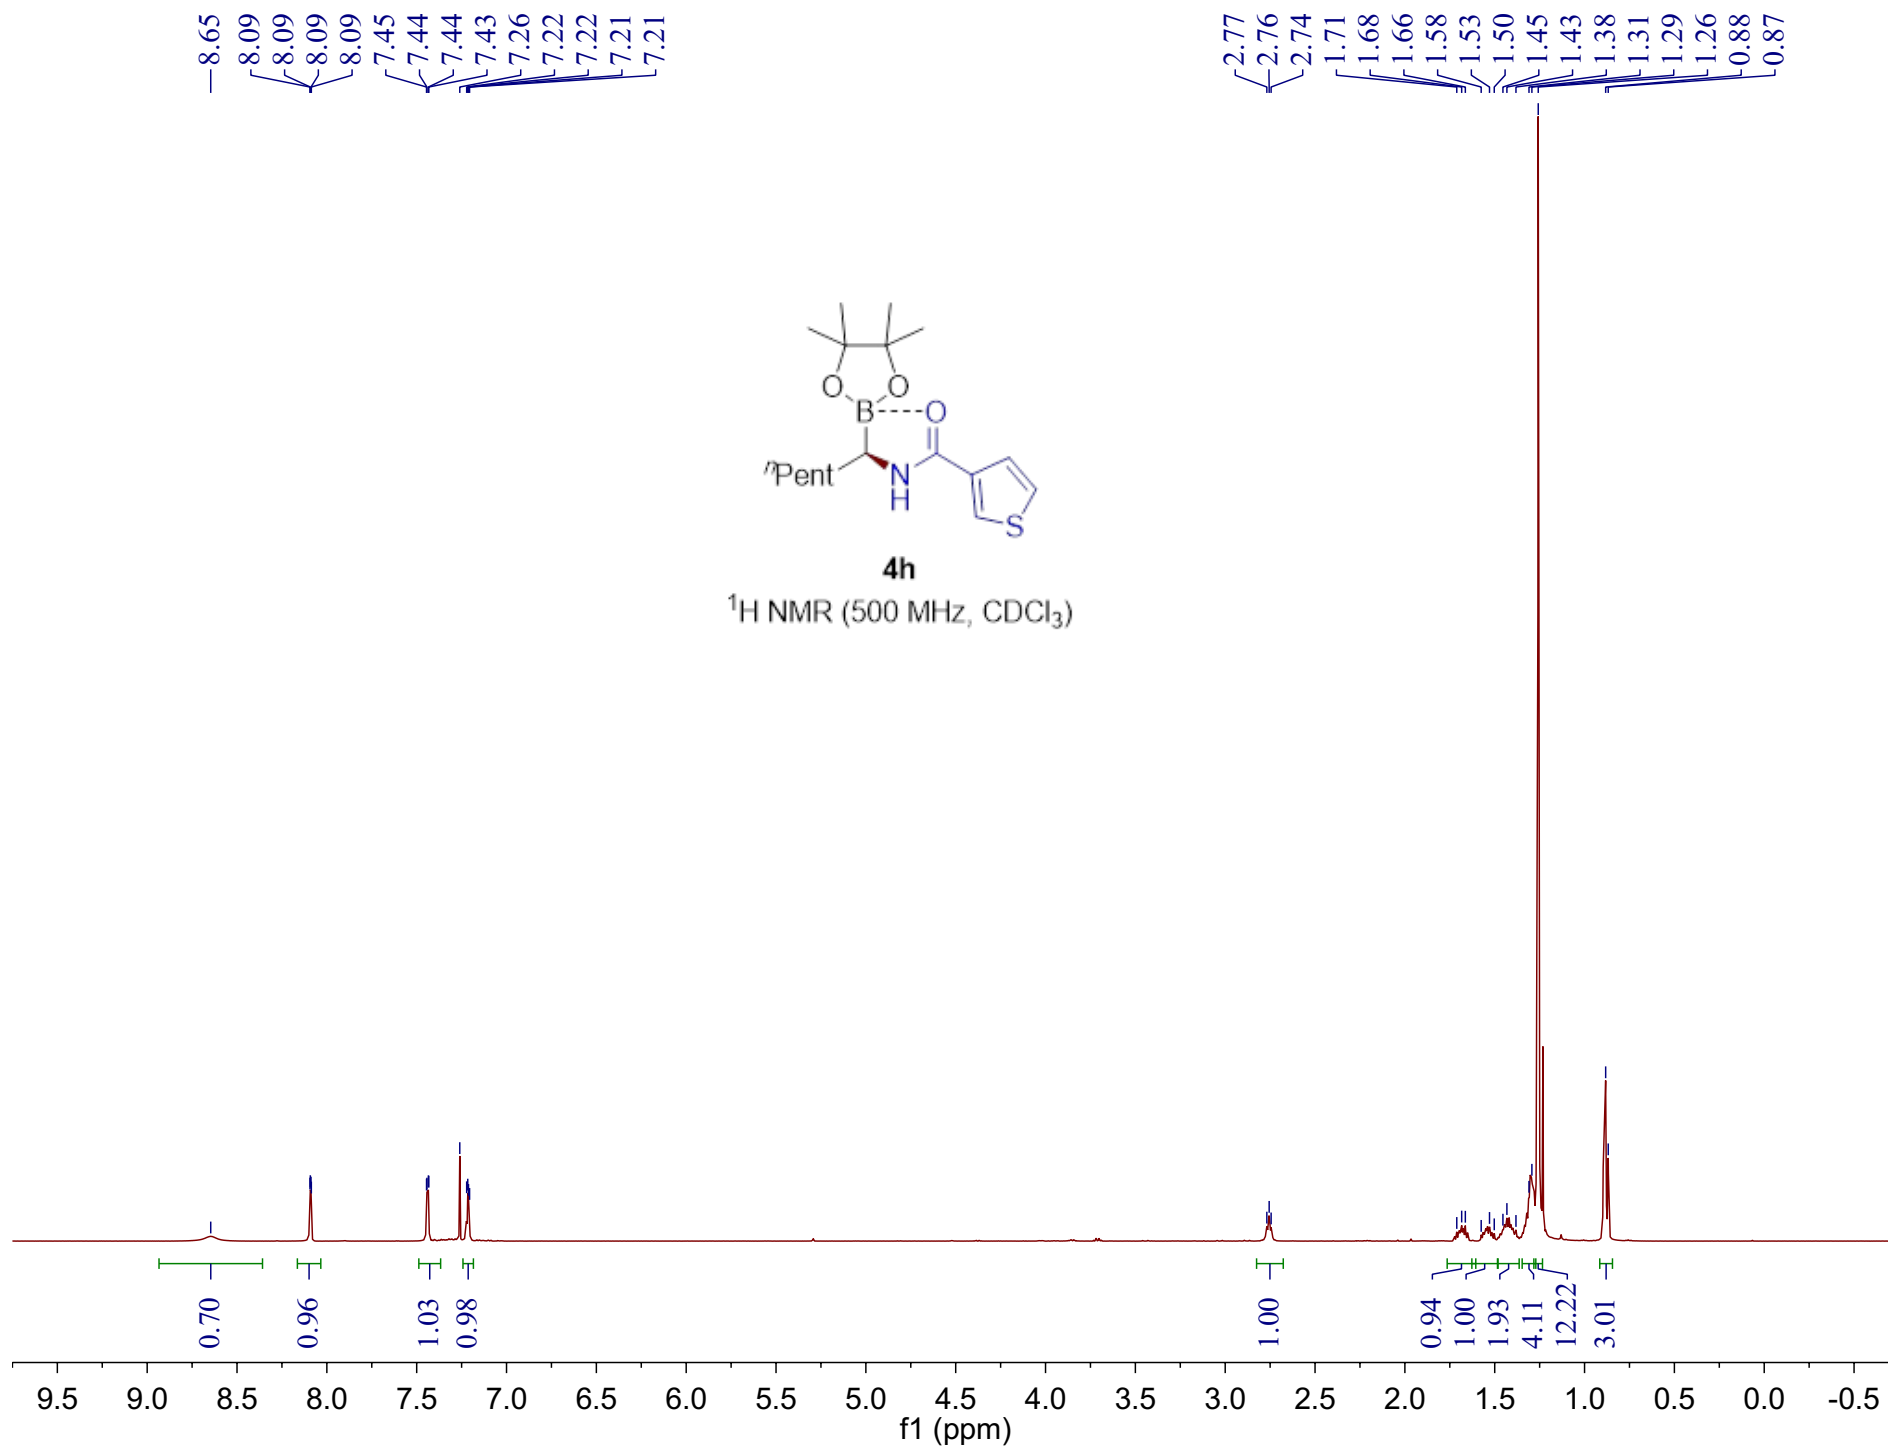

Supplementary Figure 77: <sup>1</sup>H NMR (500 MHz, CDCl<sub>3</sub>) spectrum of **4h**.

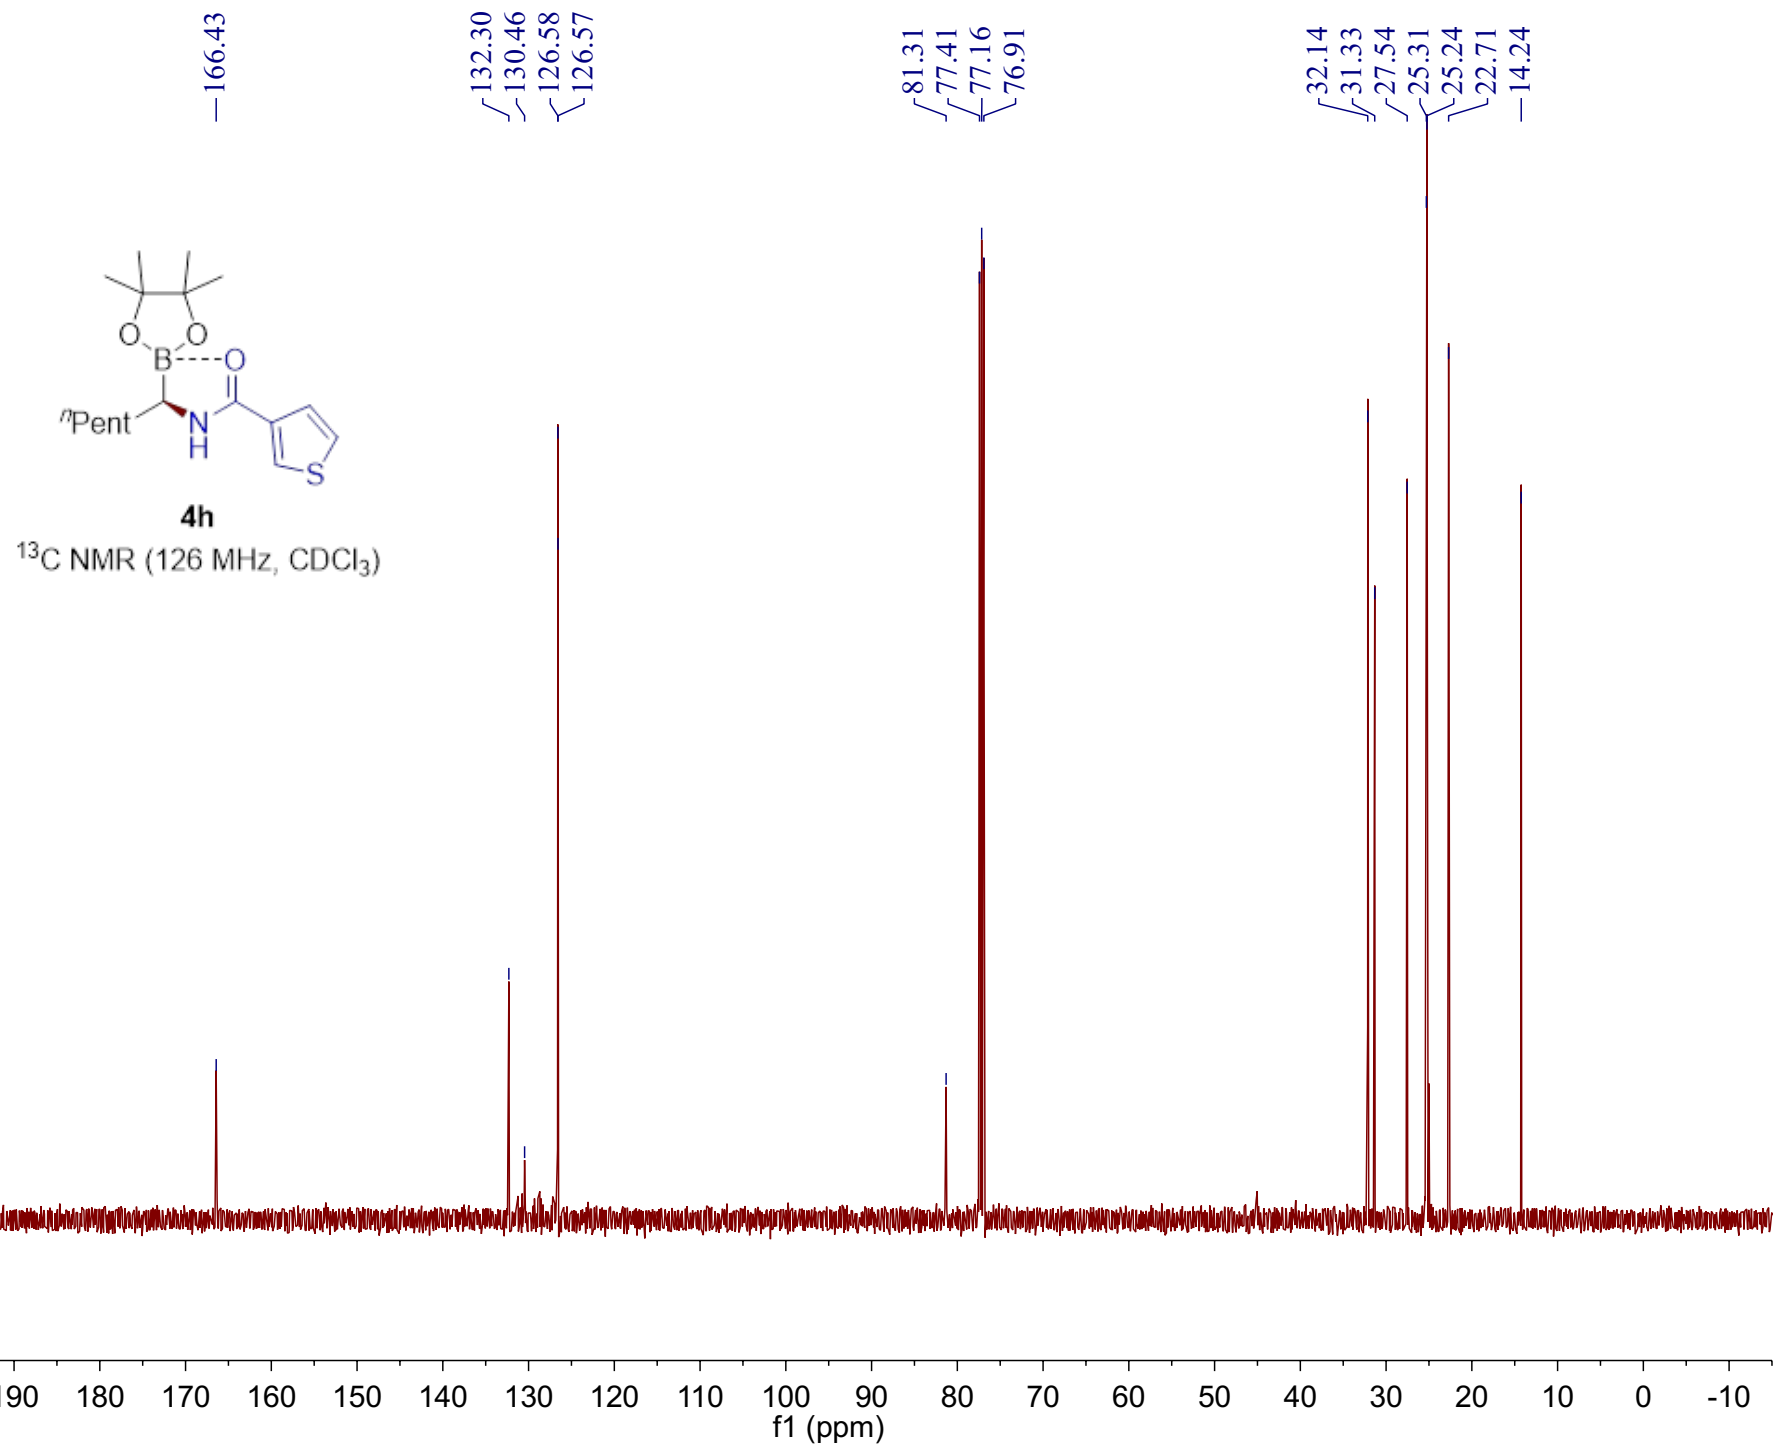

**Supplementary Figure 78:** <sup>13</sup>C NMR (126 MHz, CDCl<sub>3</sub>) spectrum of **4h**.

-17.25

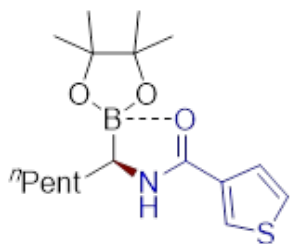

**4h**

$^{11}\text{B}$  NMR (160 MHz,  $\text{CDCl}_3$ )

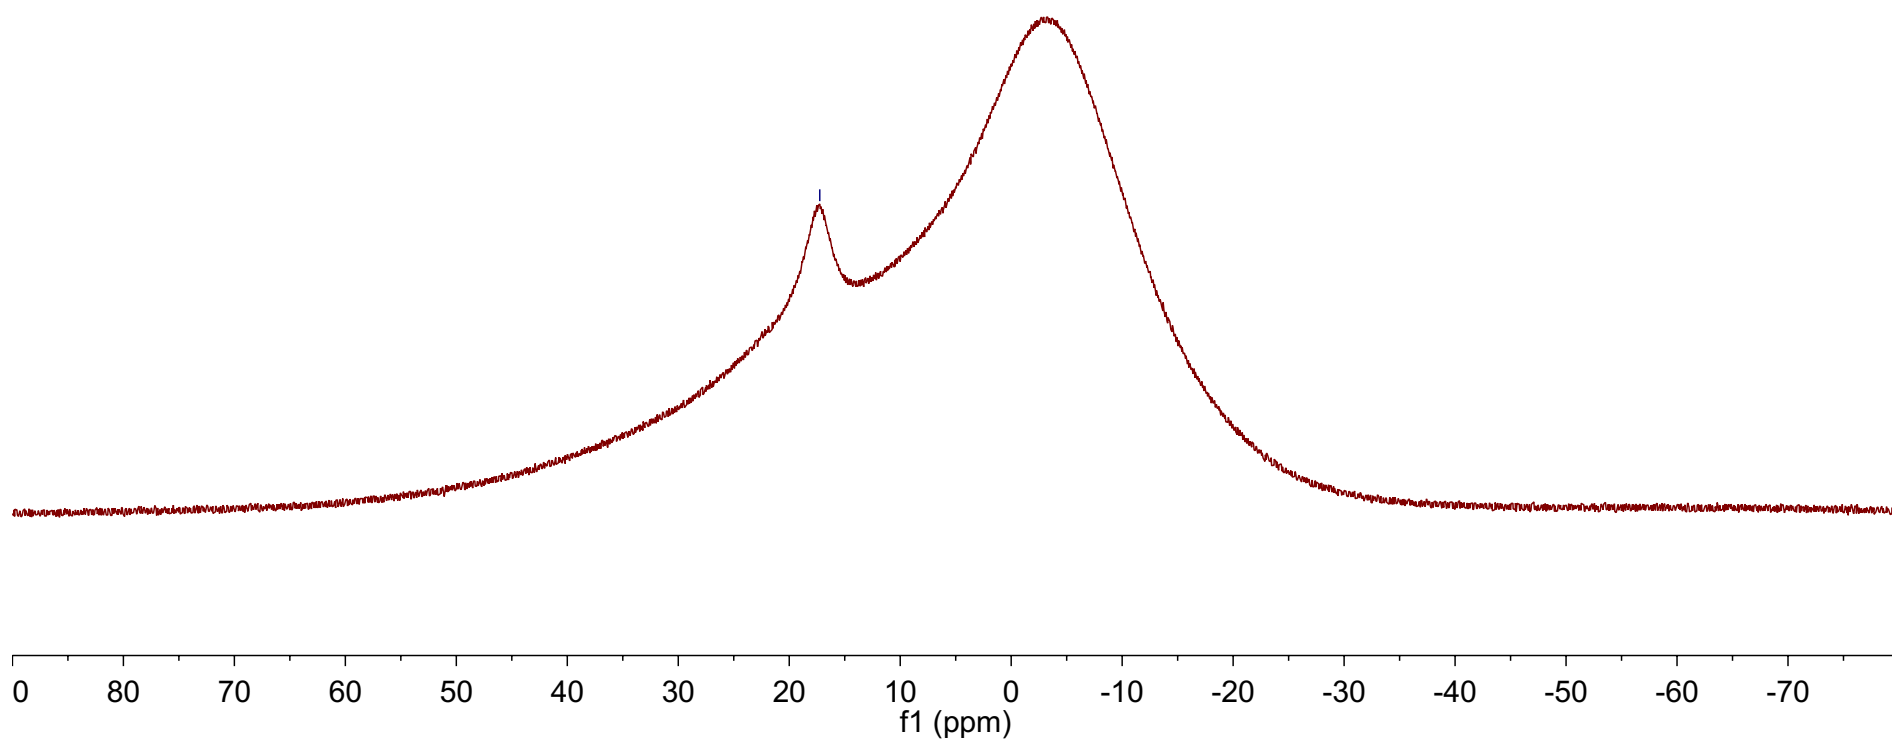

**Supplementary Figure 79:**  $^{11}\text{B}$  NMR (160 MHz,  $\text{CDCl}_3$ ) spectrum of **4h**.

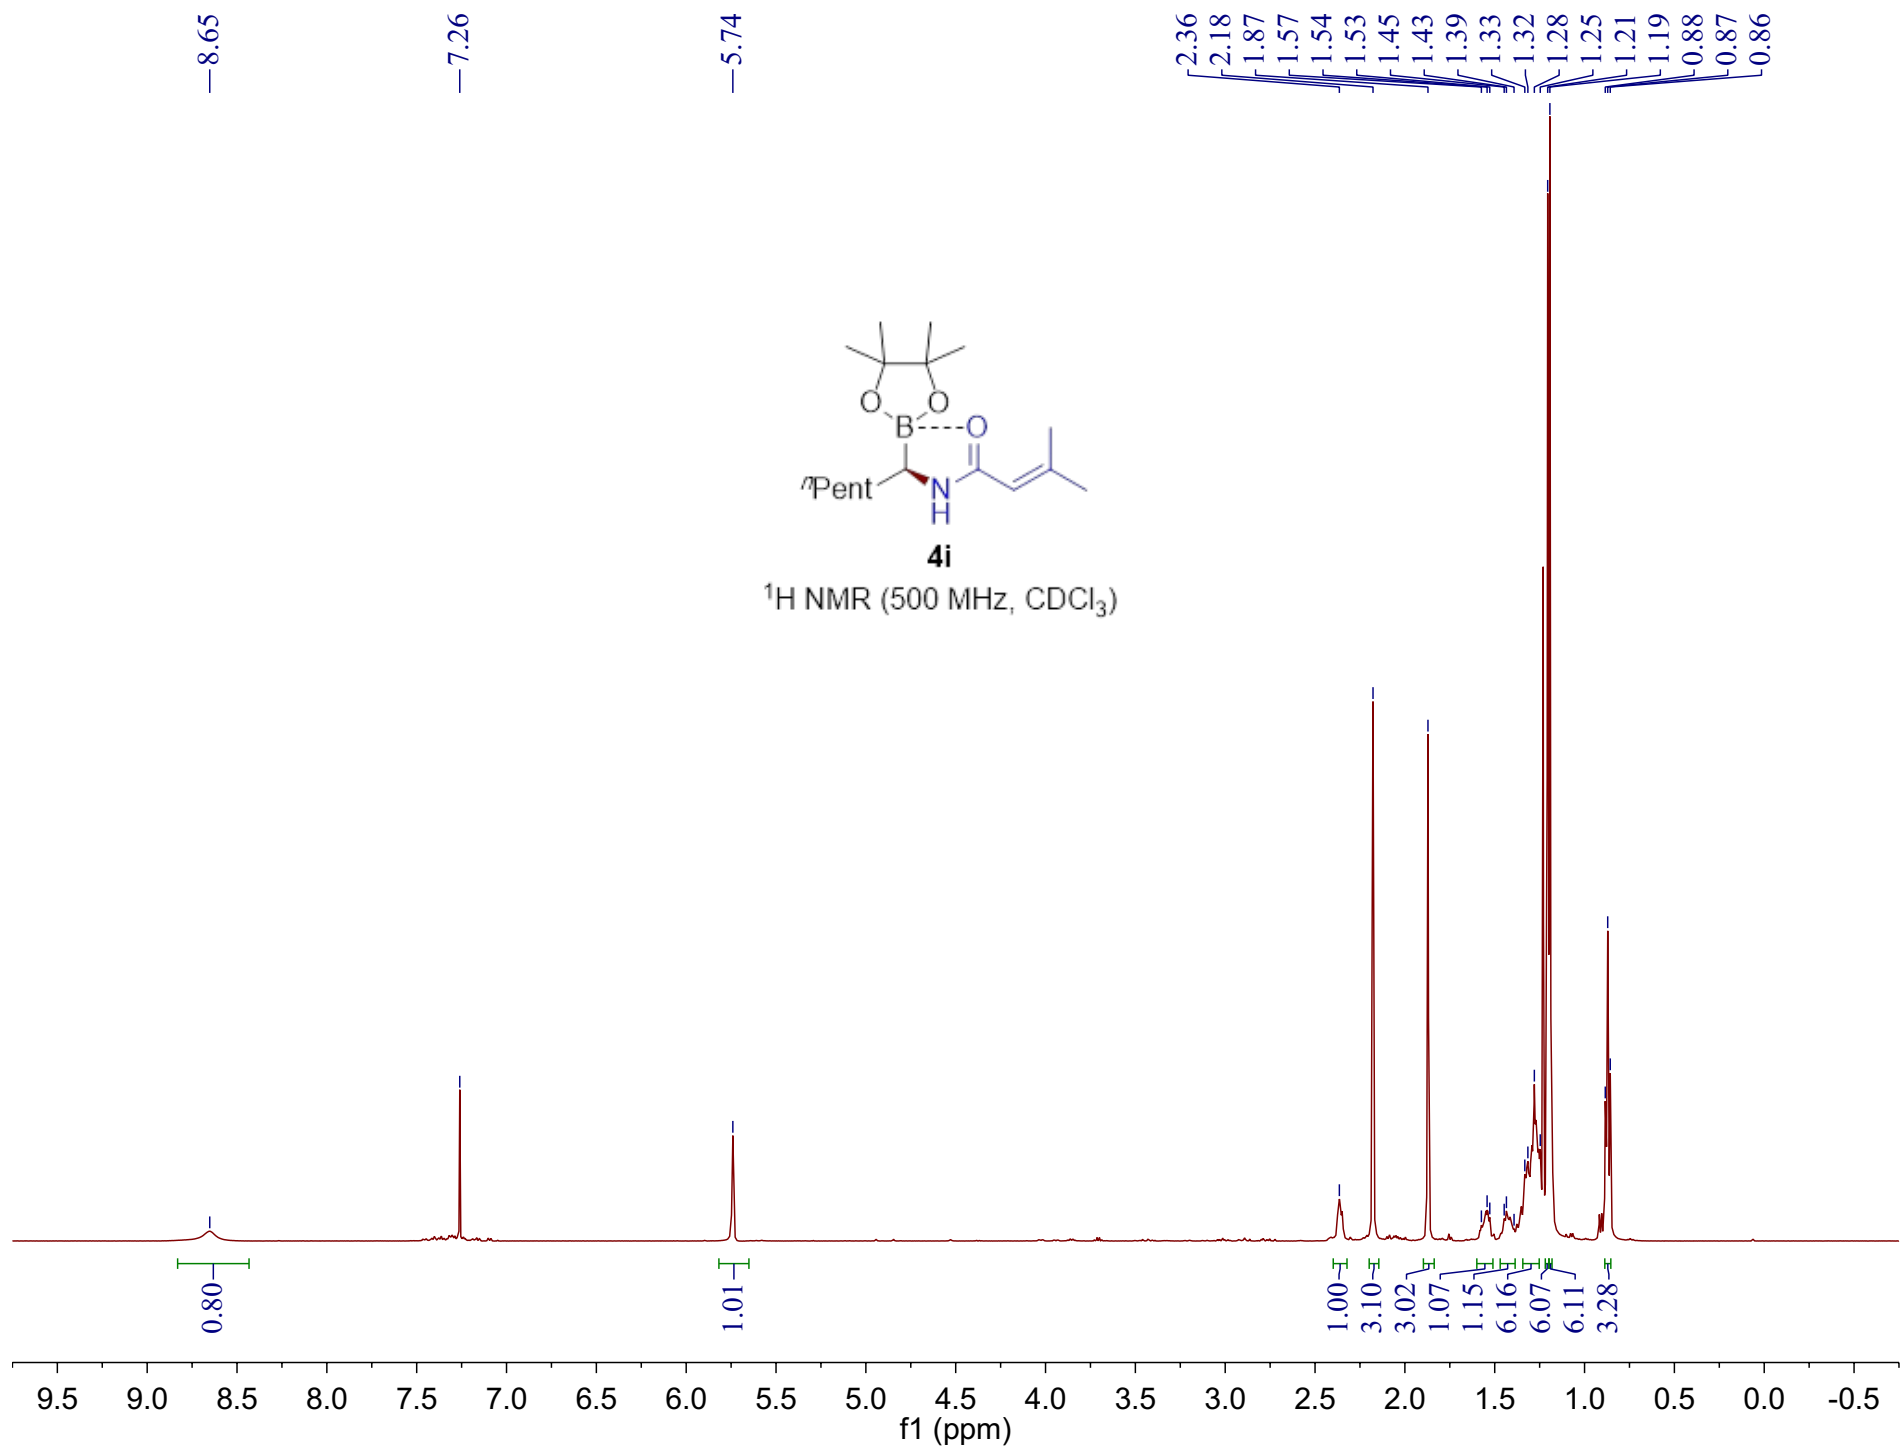

Supplementary Figure 80: <sup>1</sup>H NMR (500 MHz, CDCl<sub>3</sub>) spectrum of **4i**.



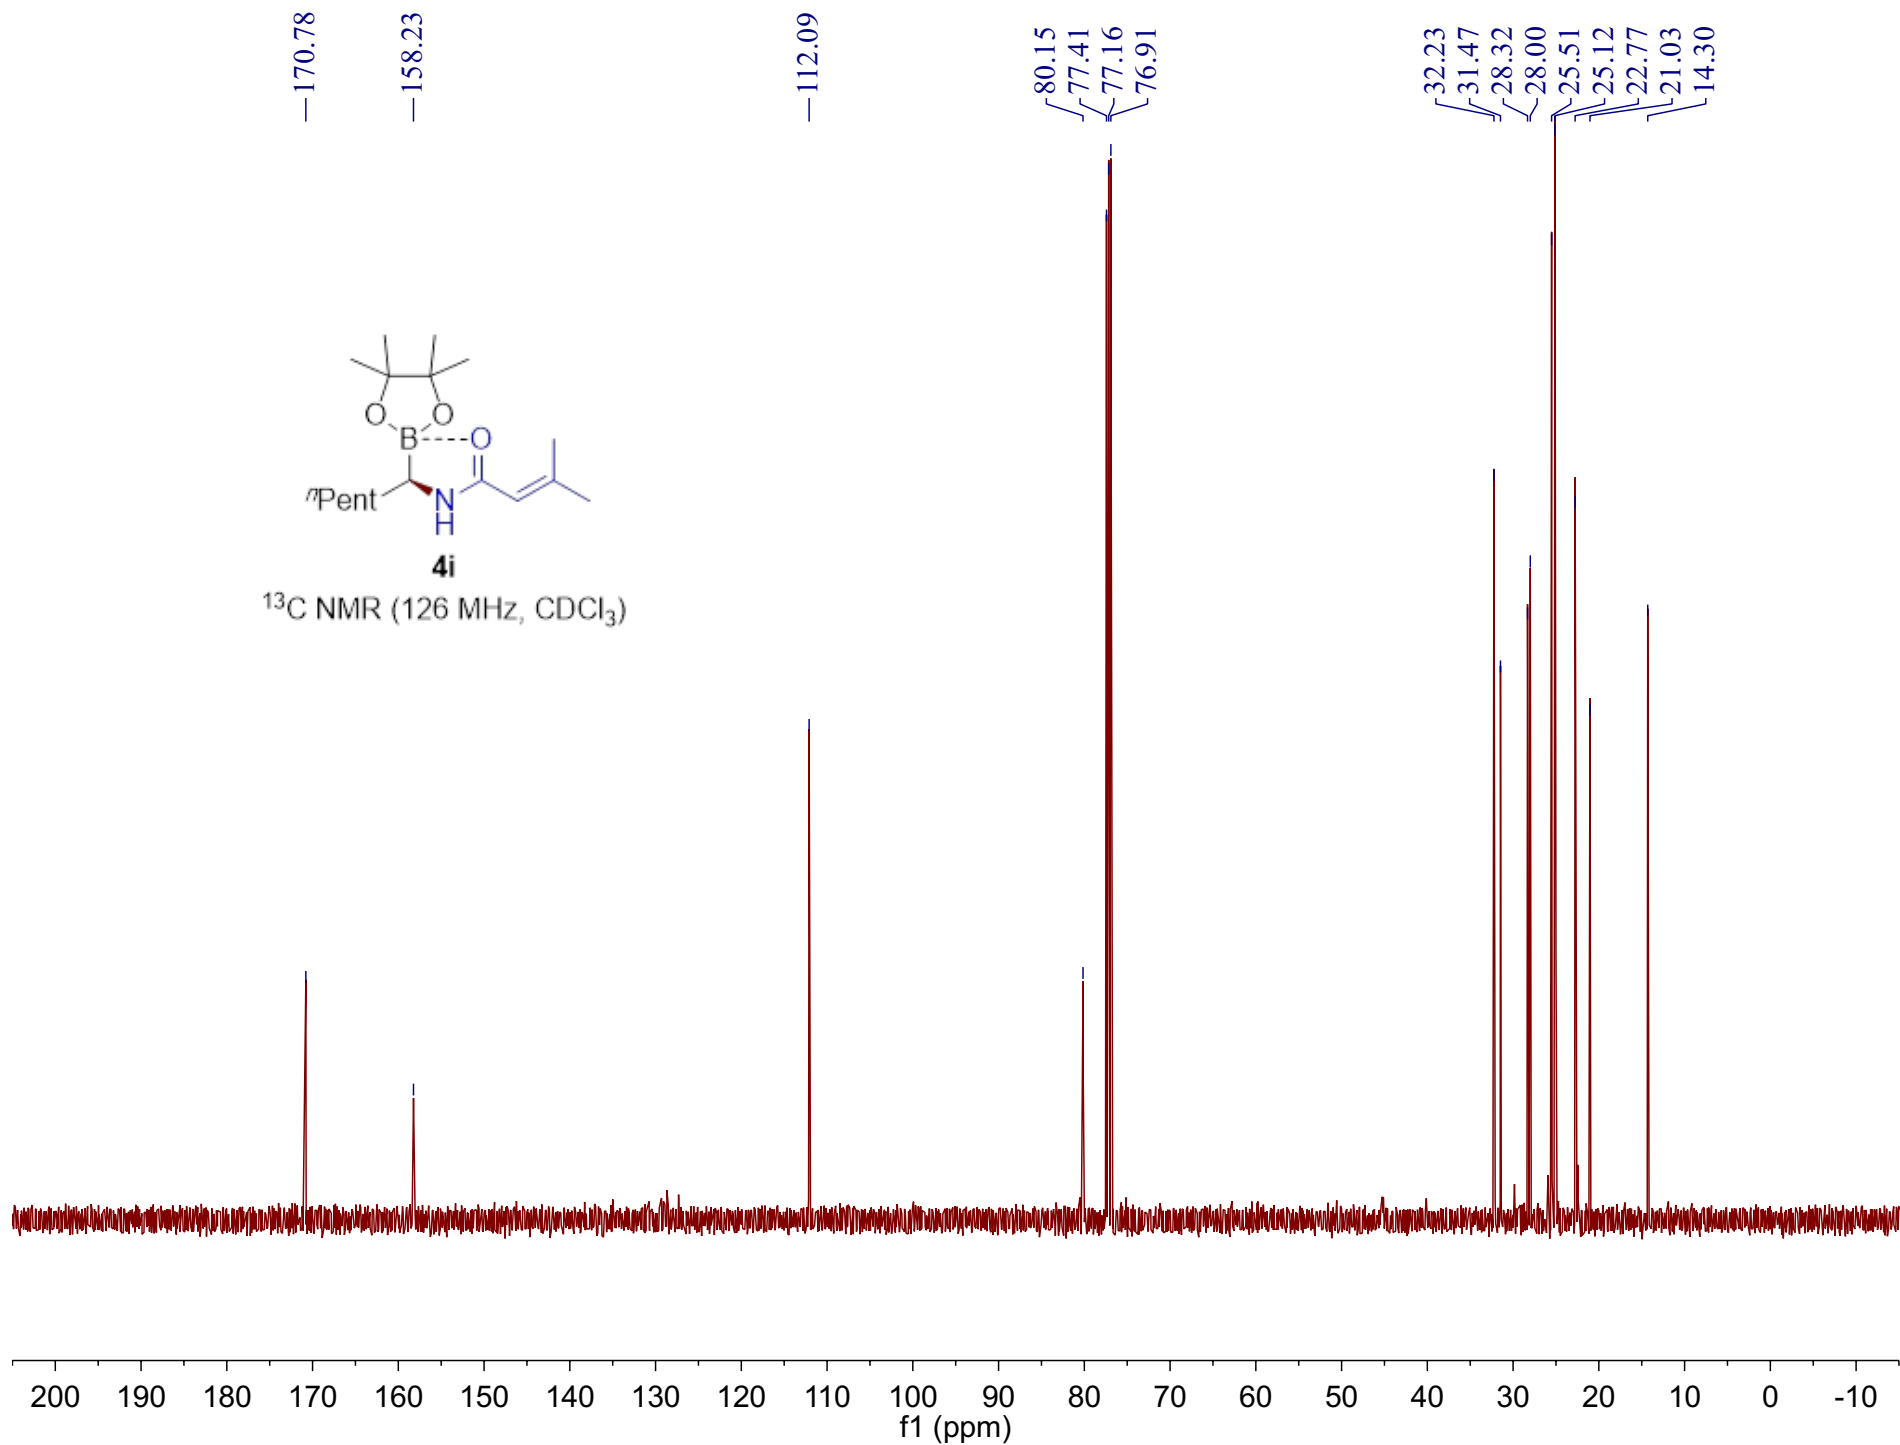

Supplementary Figure 81: <sup>13</sup>C NMR (126 MHz, CDCl<sub>3</sub>) spectrum of **4i**.

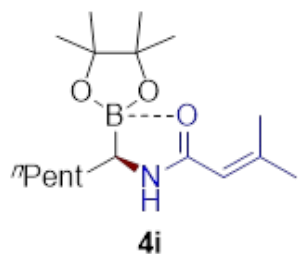

${}^{11}\text{B}$  NMR (160 MHz,  $\text{CDCl}_3$ )

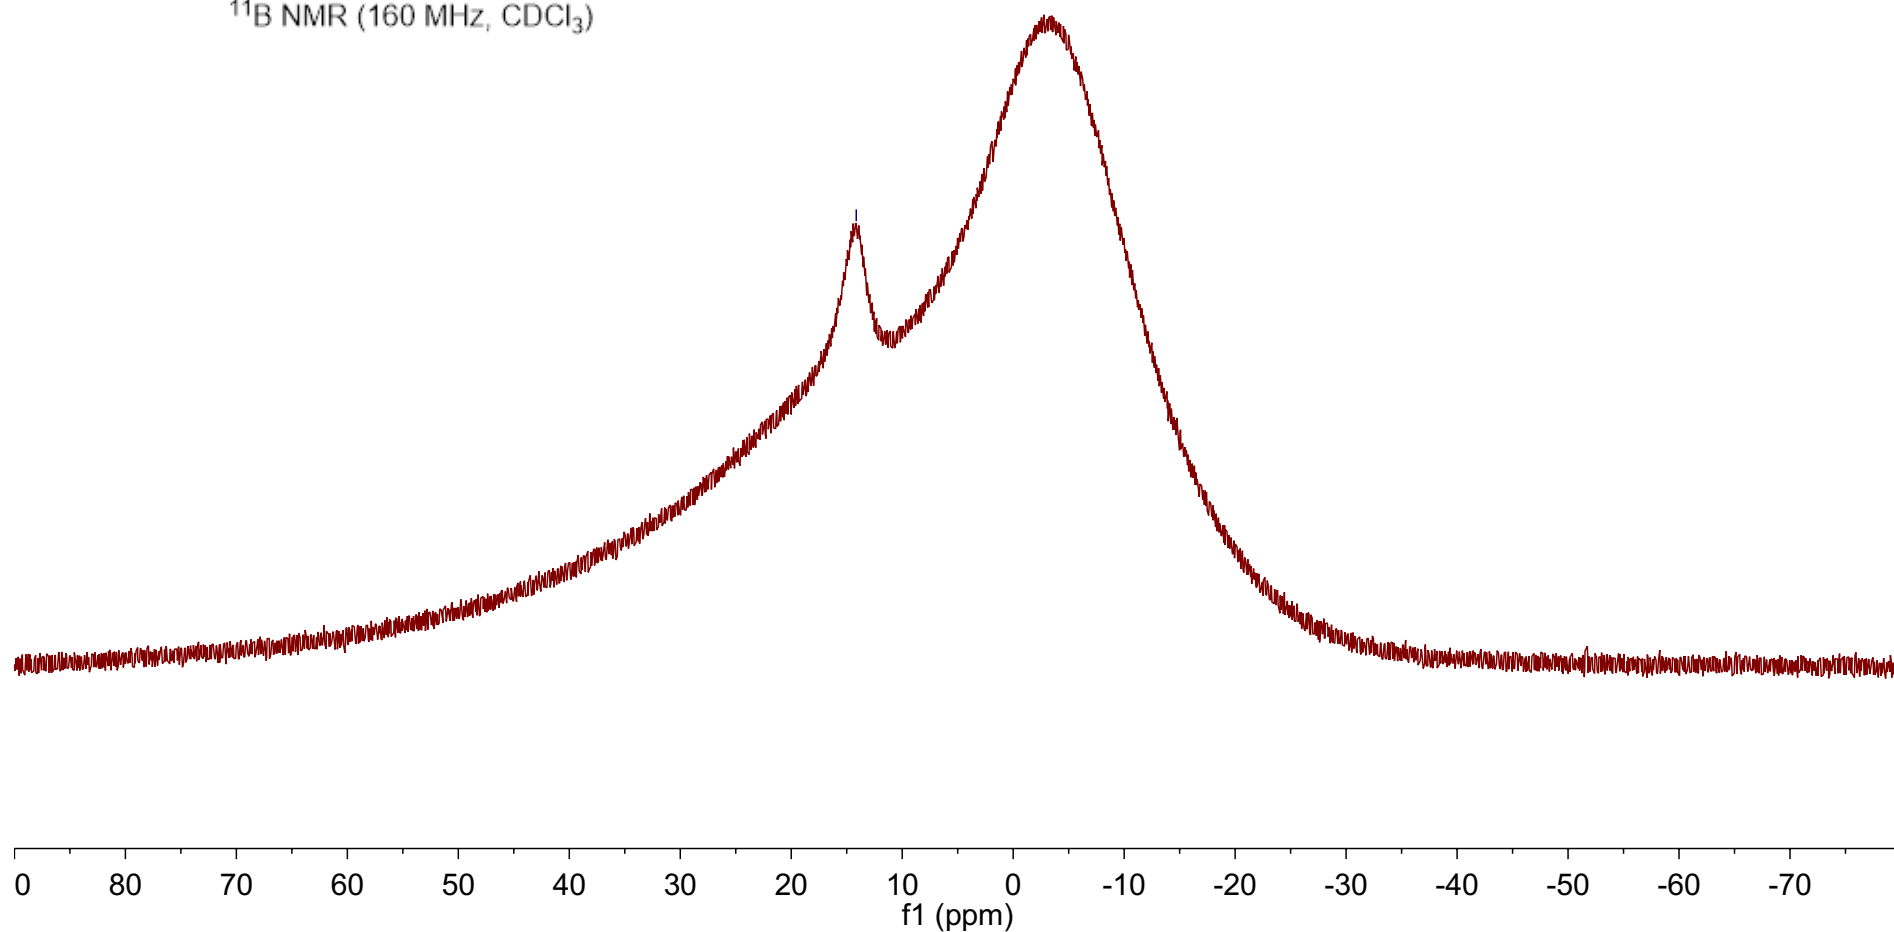

Supplementary Figure 82:  ${}^{11}\text{B}$  NMR (160 MHz,  $\text{CDCl}_3$ ) spectrum of **4i**.

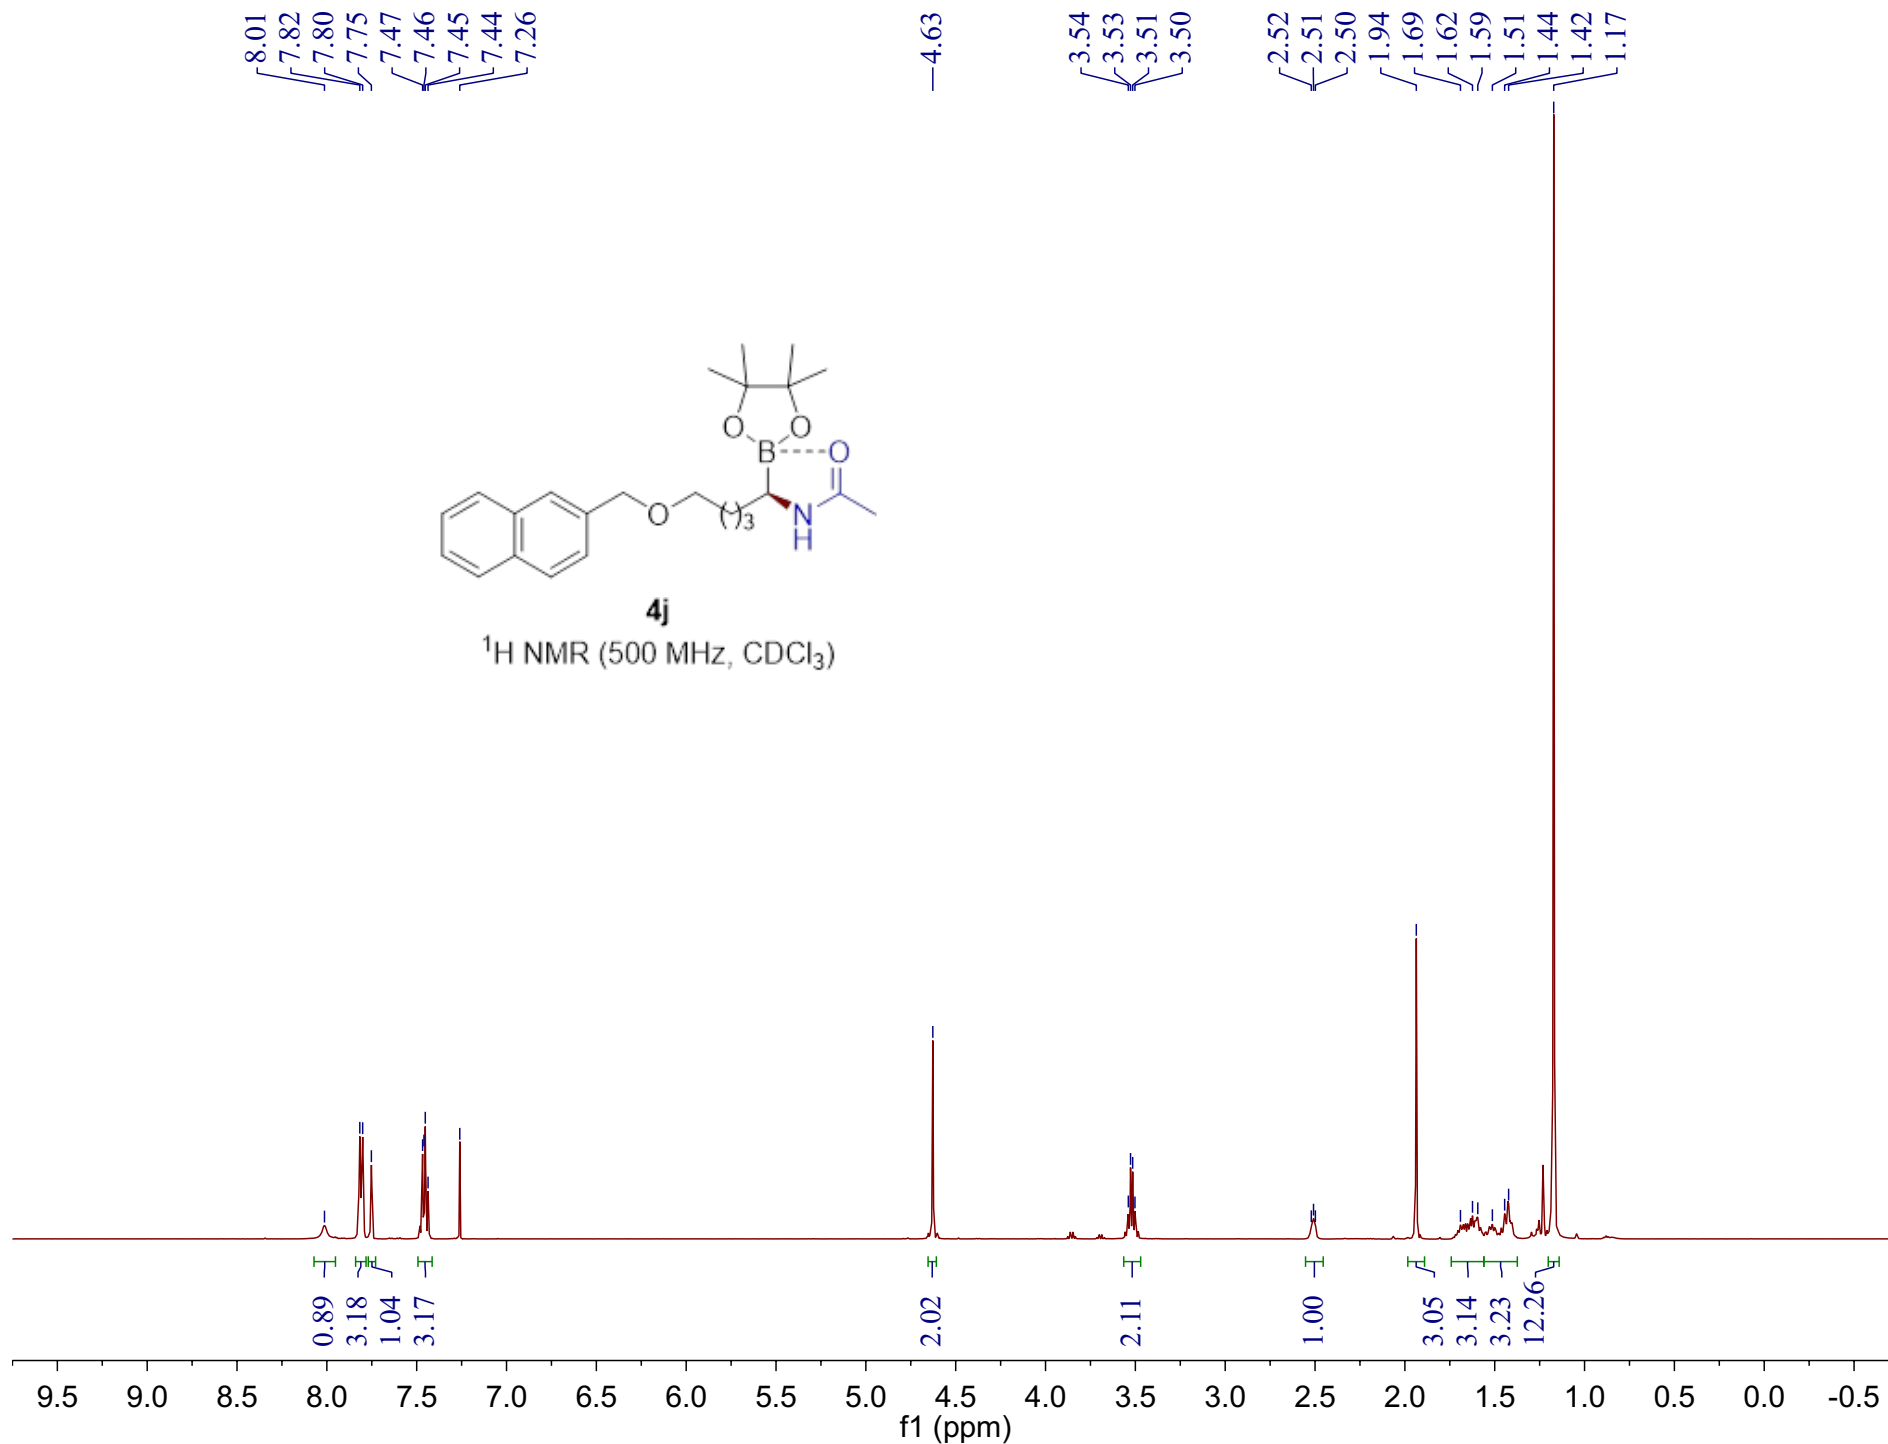

Supplementary Figure 83: <sup>1</sup>H NMR (500 MHz, CDCl<sub>3</sub>) spectrum of **4j**.

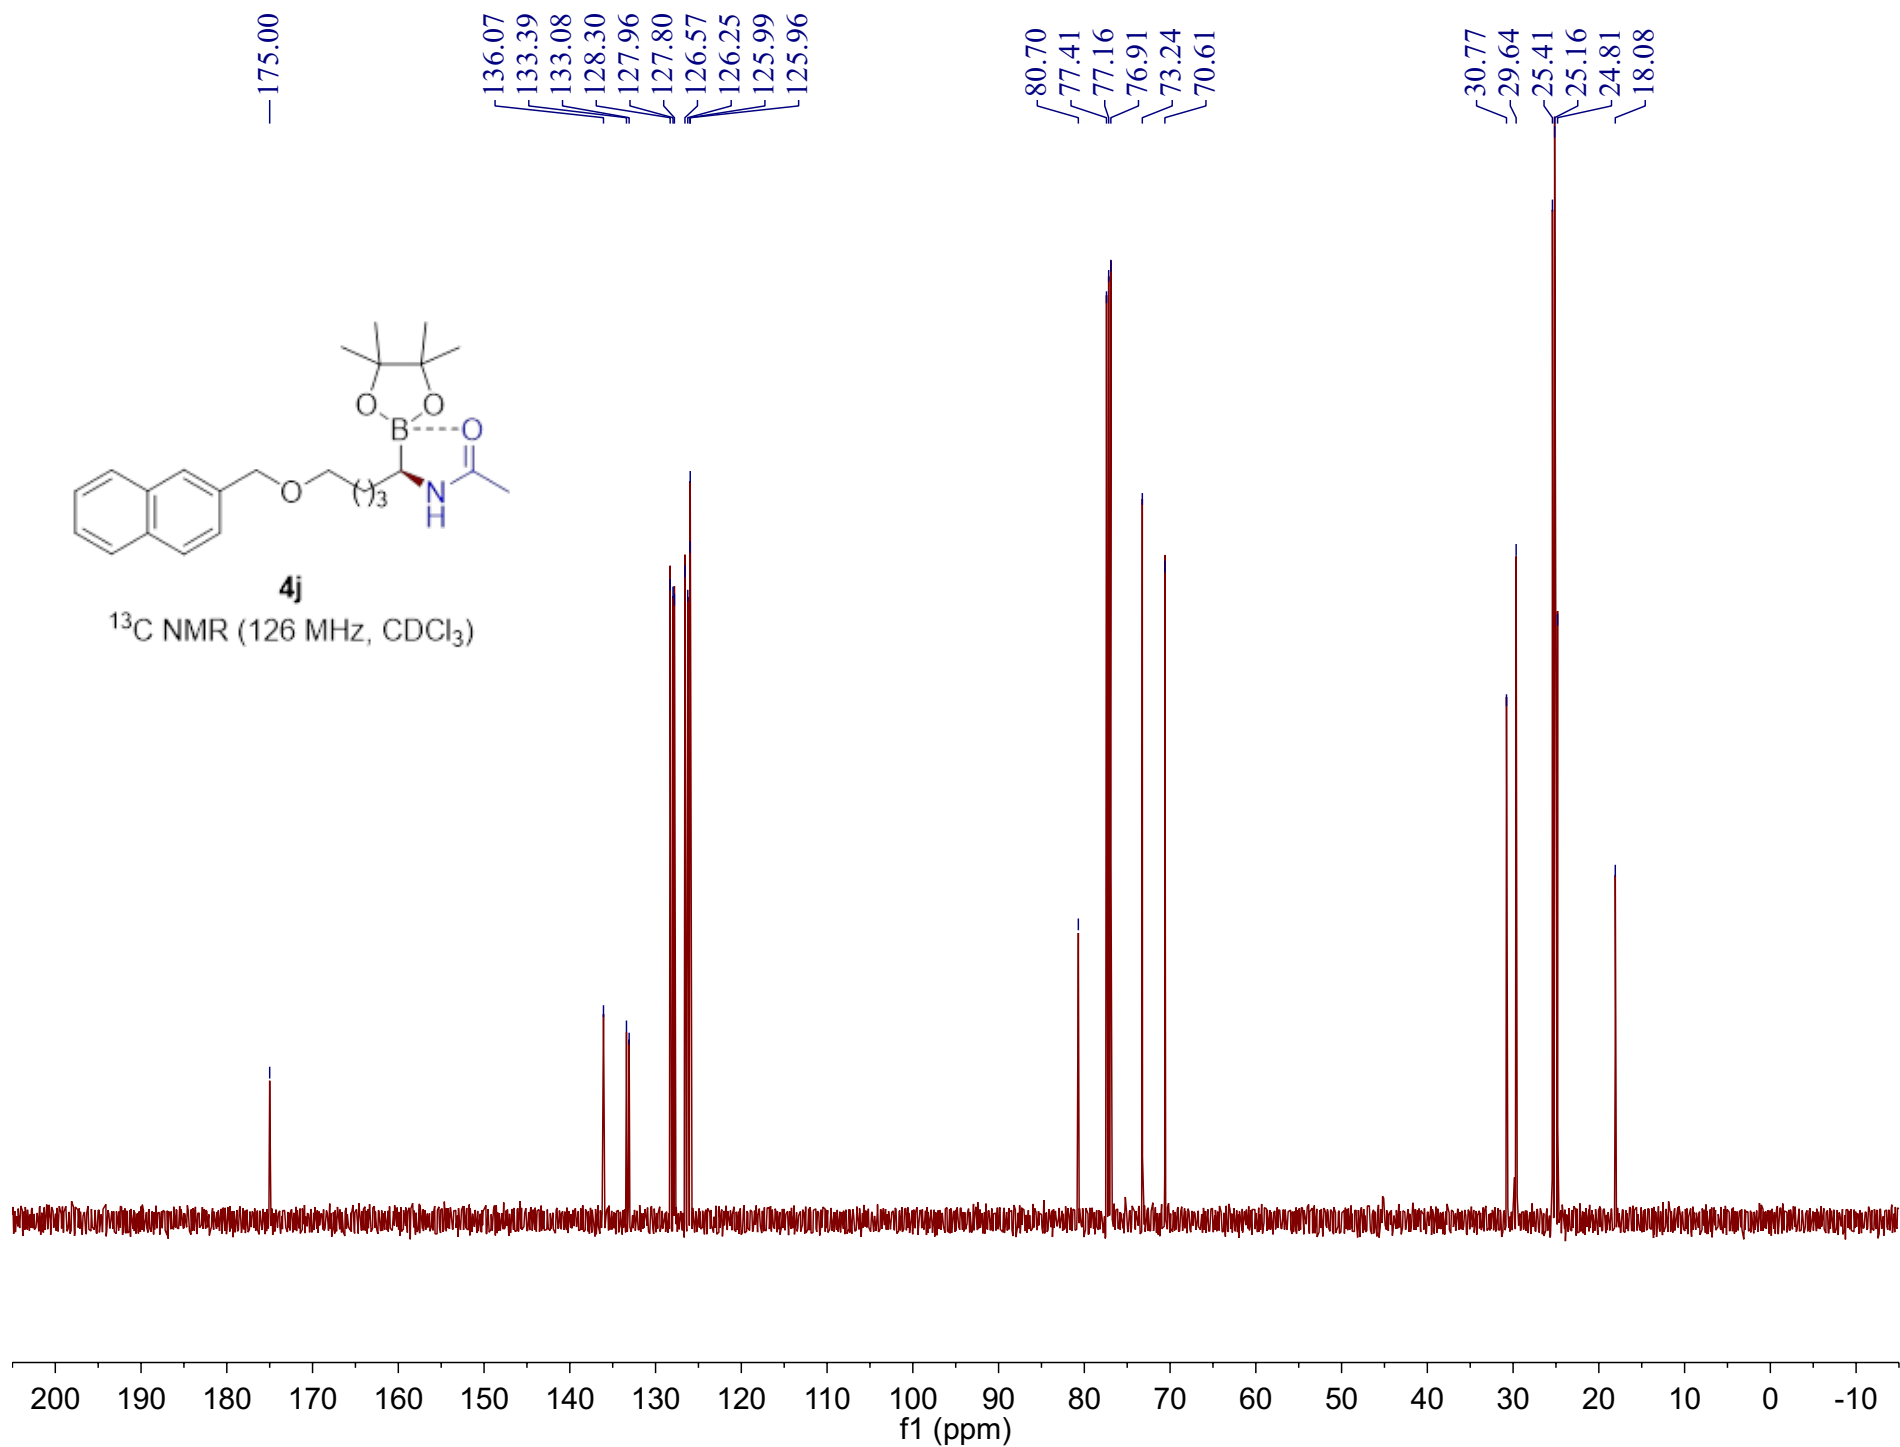

Supplementary Figure 84: <sup>13</sup>C NMR (126 MHz, CDCl<sub>3</sub>) spectrum of **4j**.

—16.55

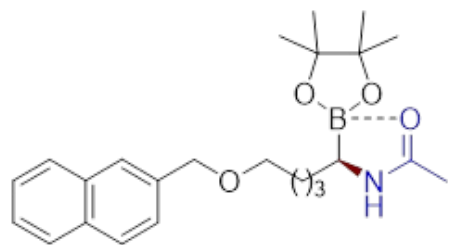

**4j**

$^{11}\text{B}$  NMR (160 MHz,  $\text{CDCl}_3$ )

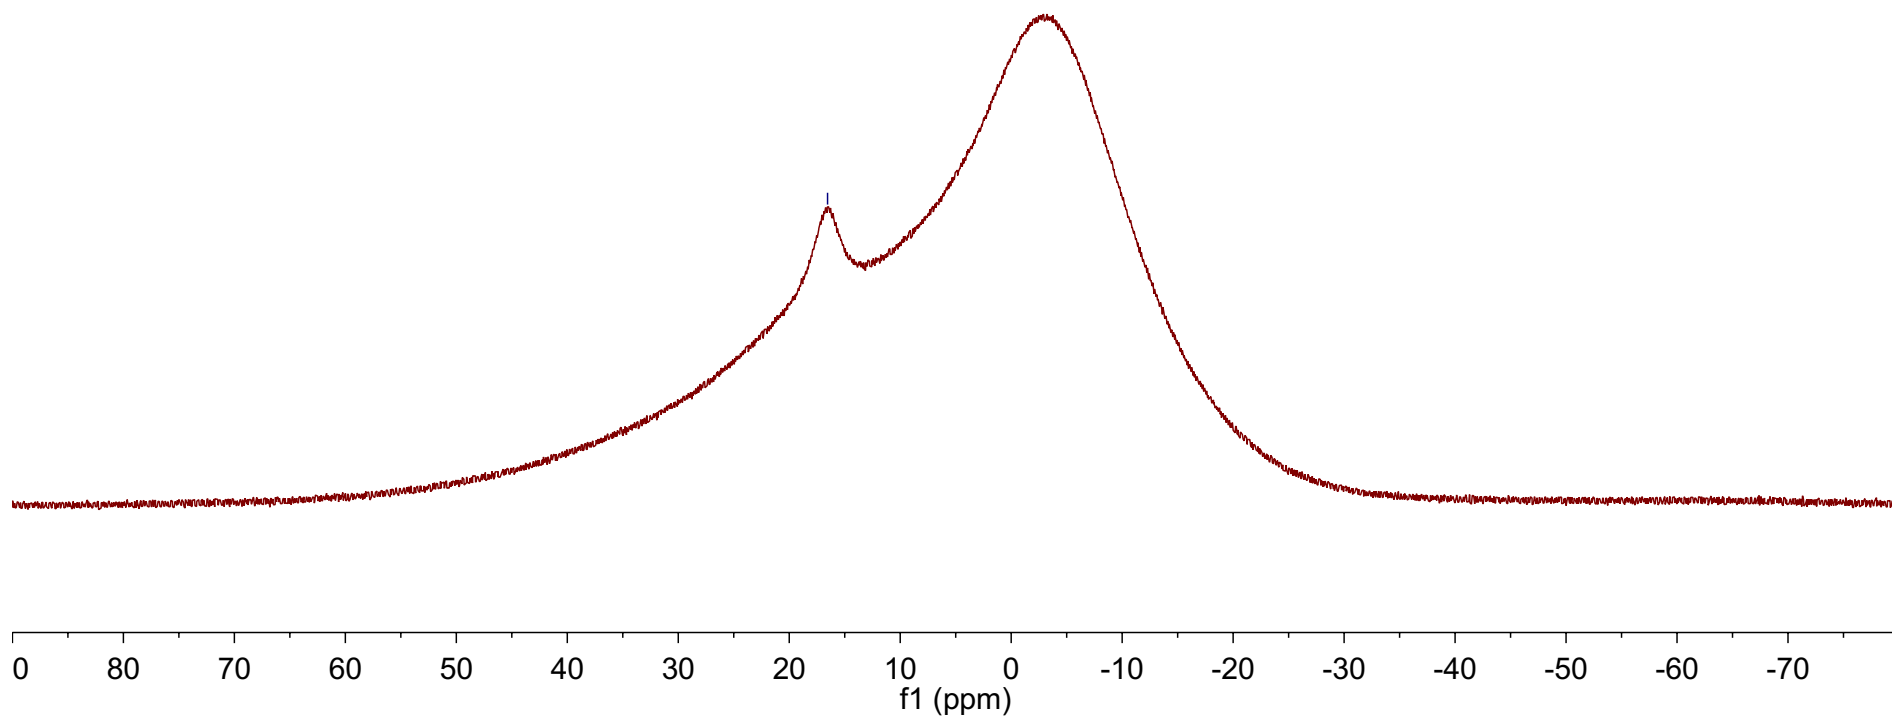

**Supplementary Figure 85:**  $^{11}\text{B}$  NMR (160 MHz,  $\text{CDCl}_3$ ) spectrum of **4j**.

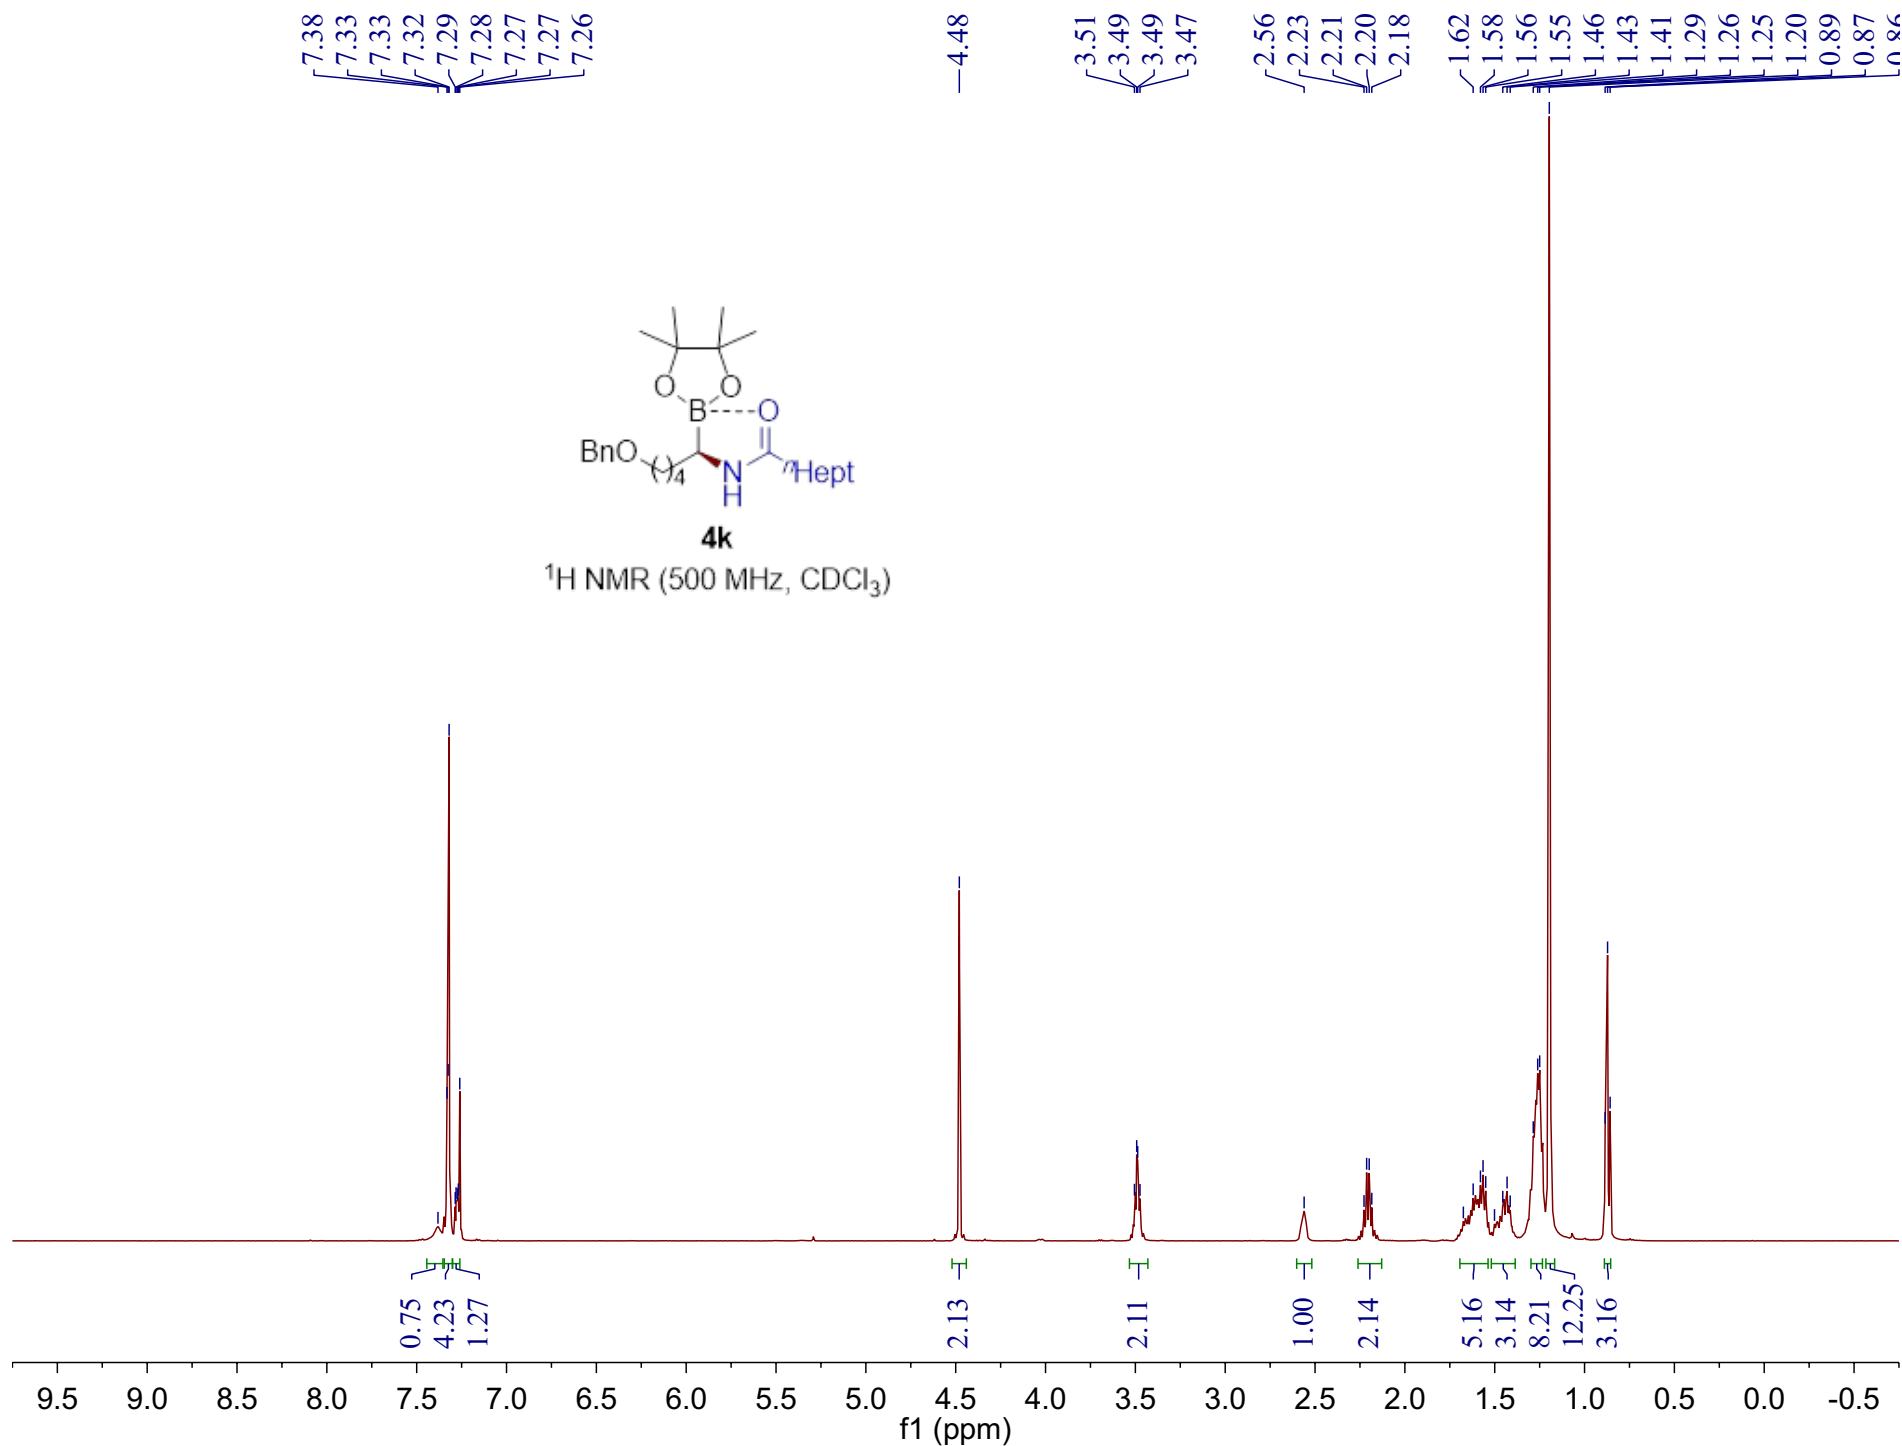

Supplementary Figure 86: <sup>1</sup>H NMR (500 MHz, CDCl<sub>3</sub>) spectrum of **4k**.

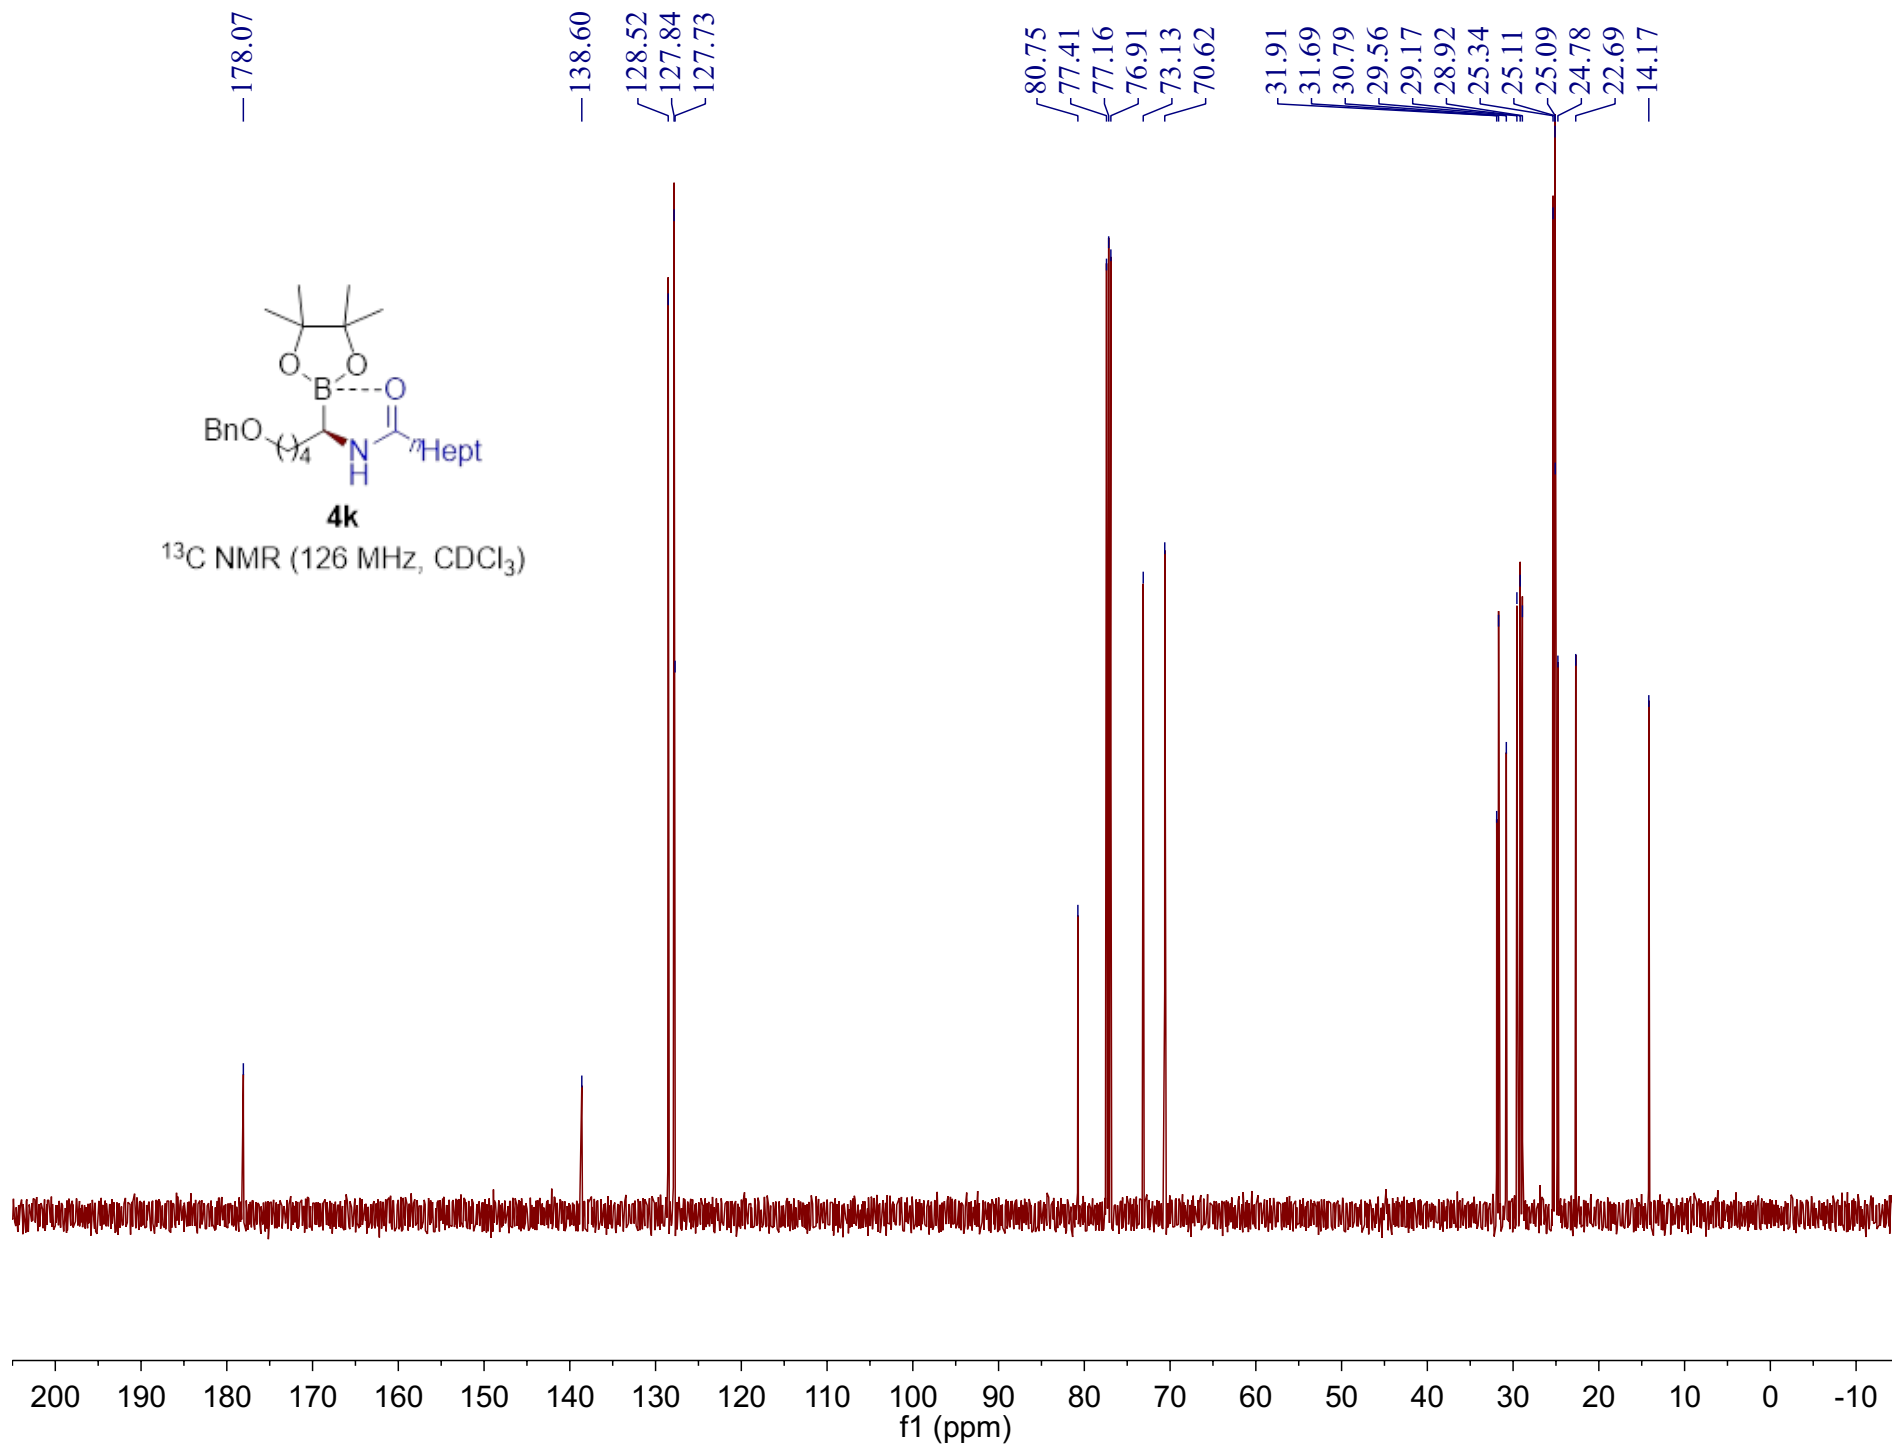

Supplementary Figure 87:  $^{13}\text{C}$  NMR (126 MHz,  $\text{CDCl}_3$ ) spectrum of **4k**.

—16.58

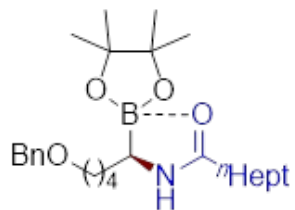

**4k**

$^{11}\text{B}$  NMR (160 MHz,  $\text{CDCl}_3$ )

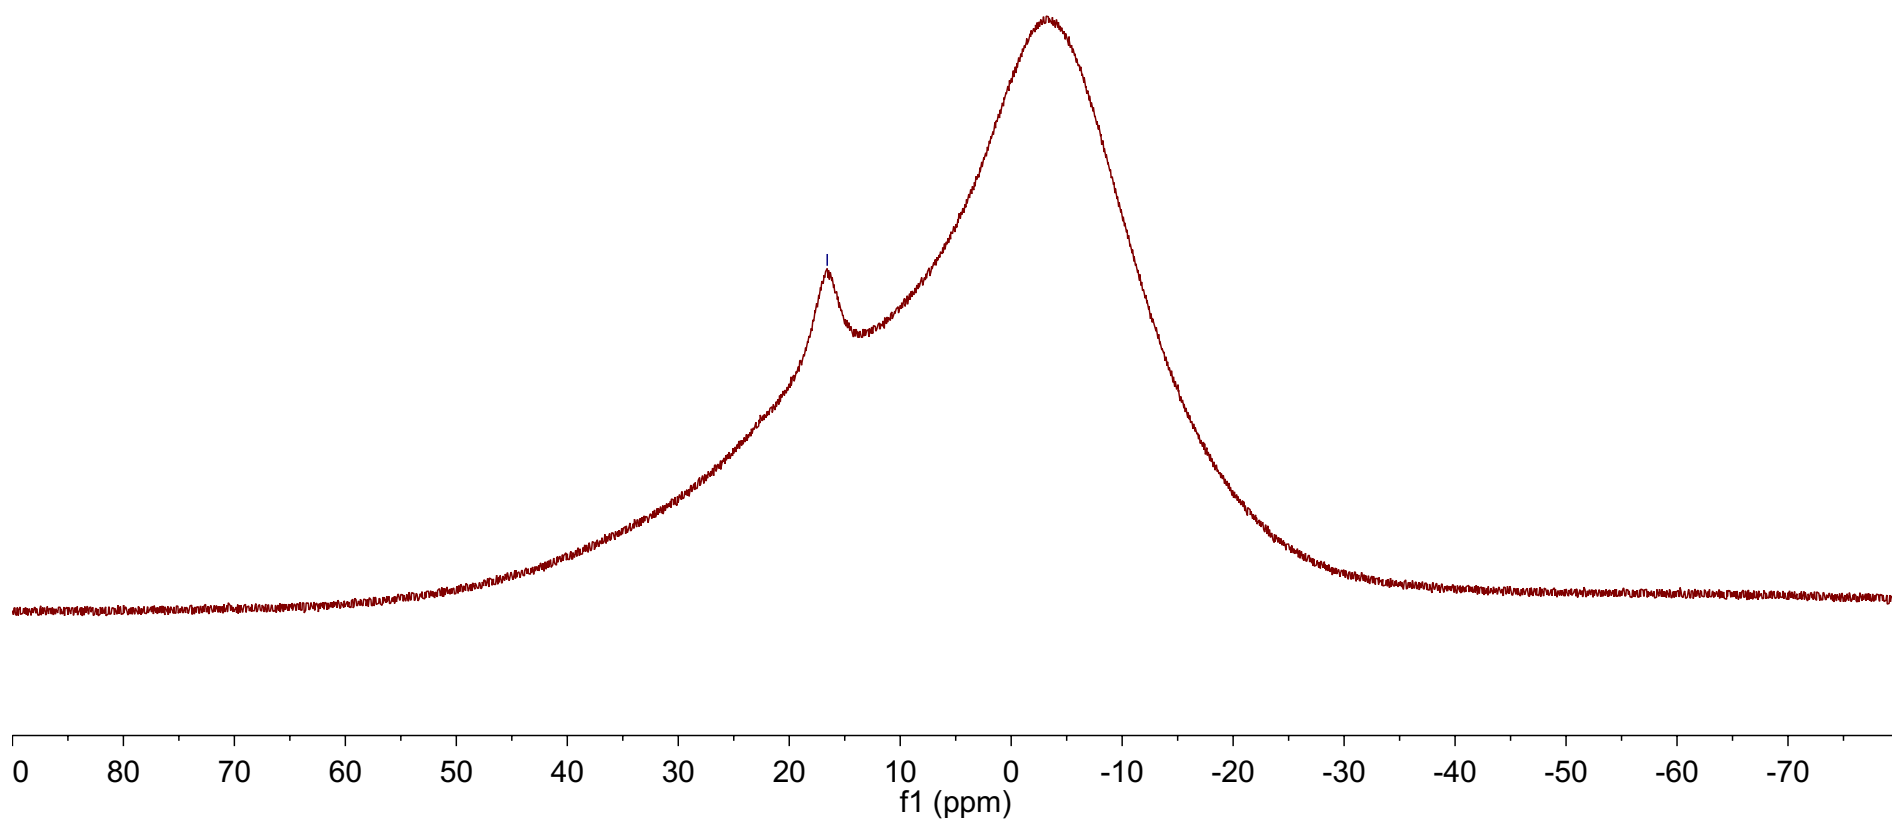

Supplementary Figure 88:  $^{11}\text{B}$  NMR (160 MHz,  $\text{CDCl}_3$ ) spectrum of **4k**.



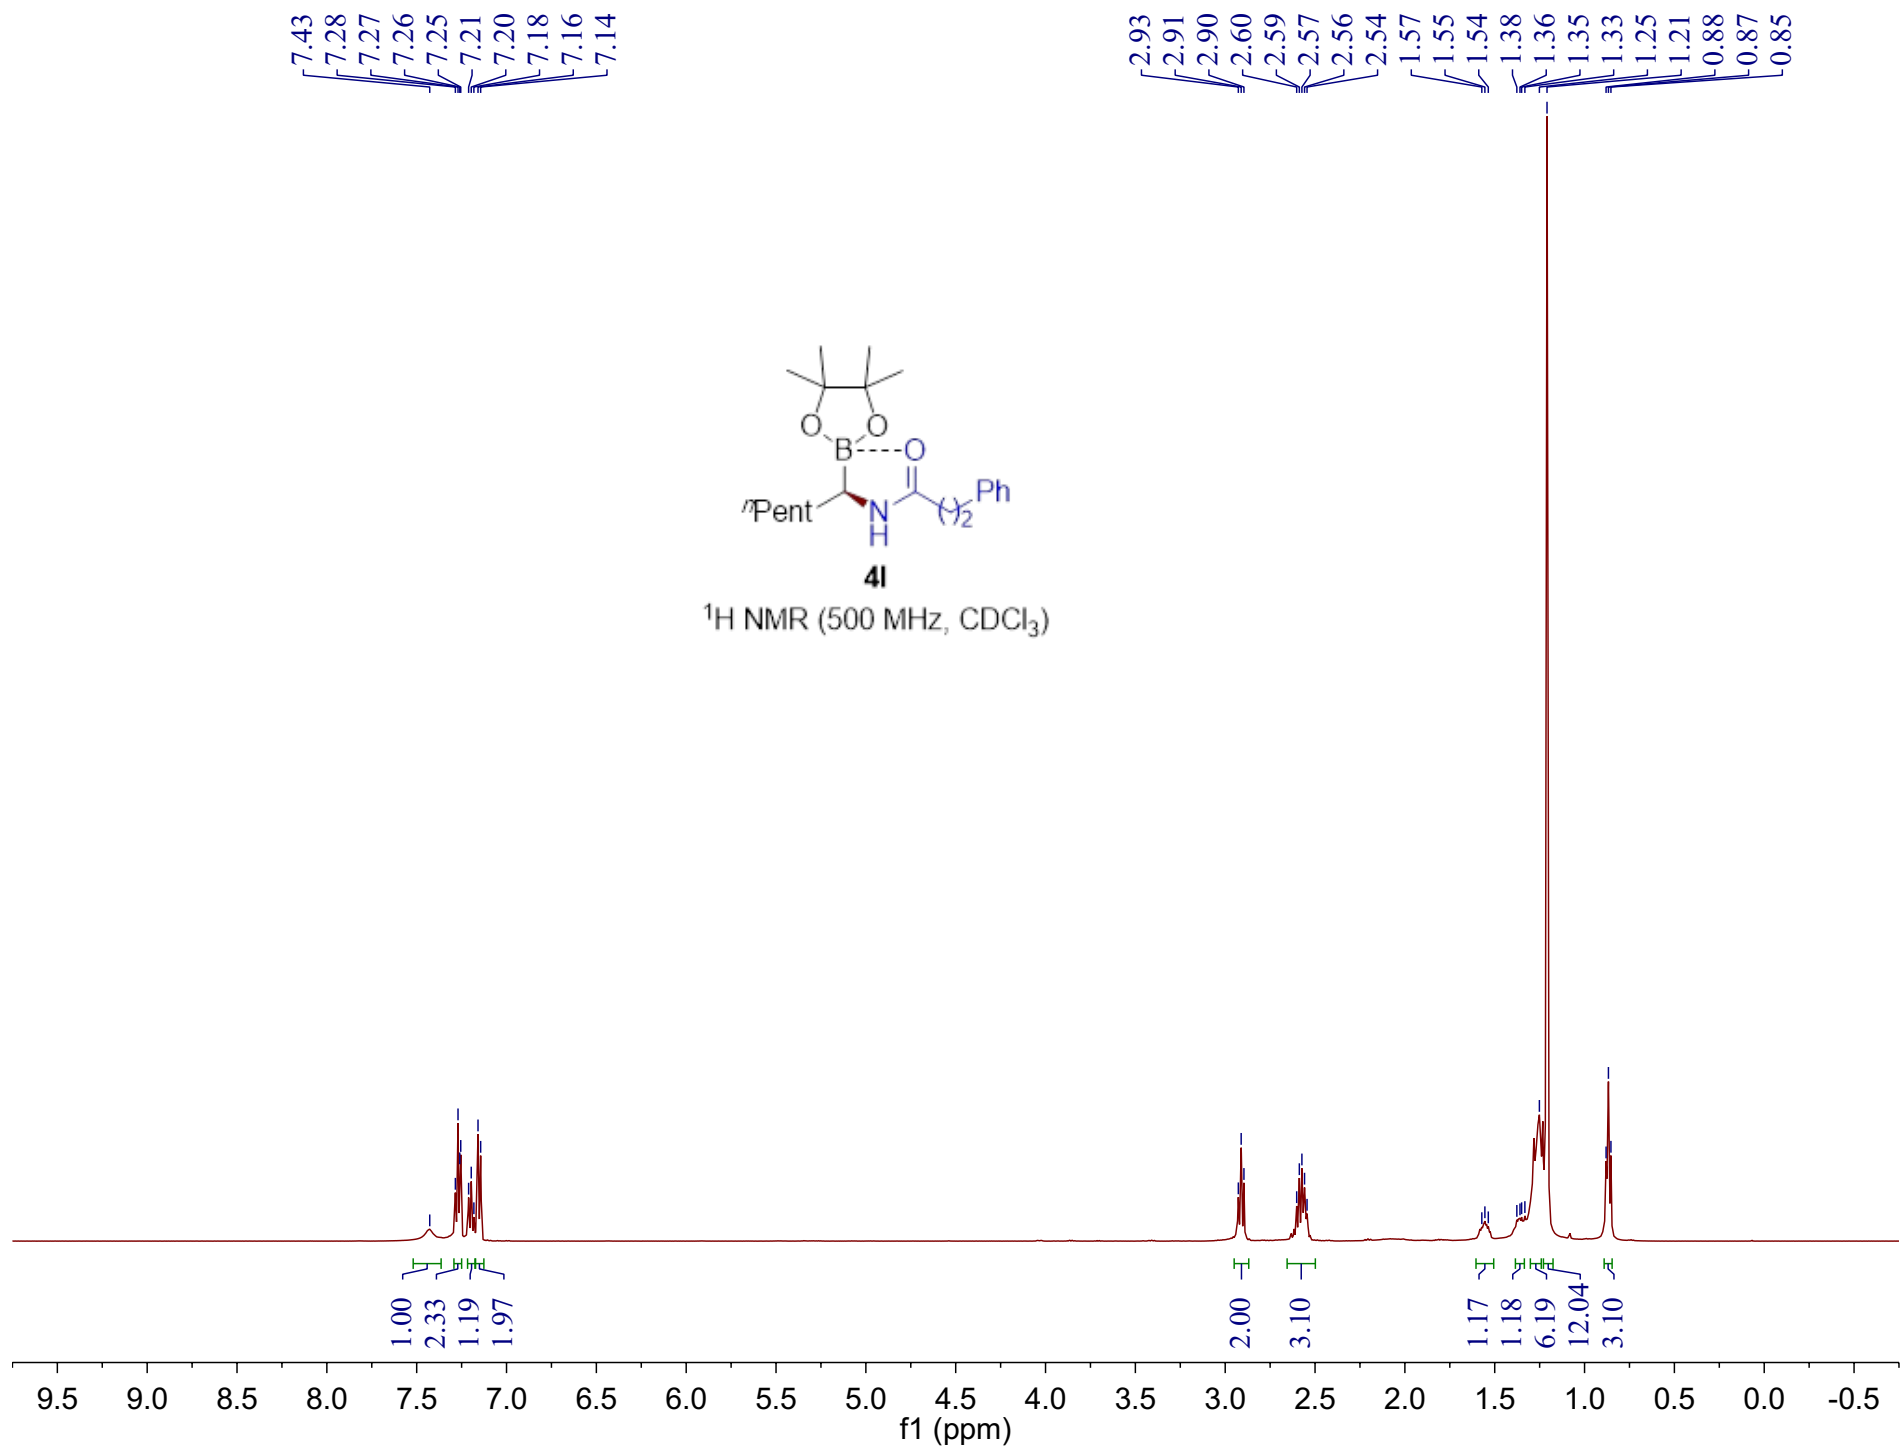

Supplementary Figure 89: <sup>1</sup>H NMR (500 MHz, CDCl<sub>3</sub>) spectrum of **4l**.

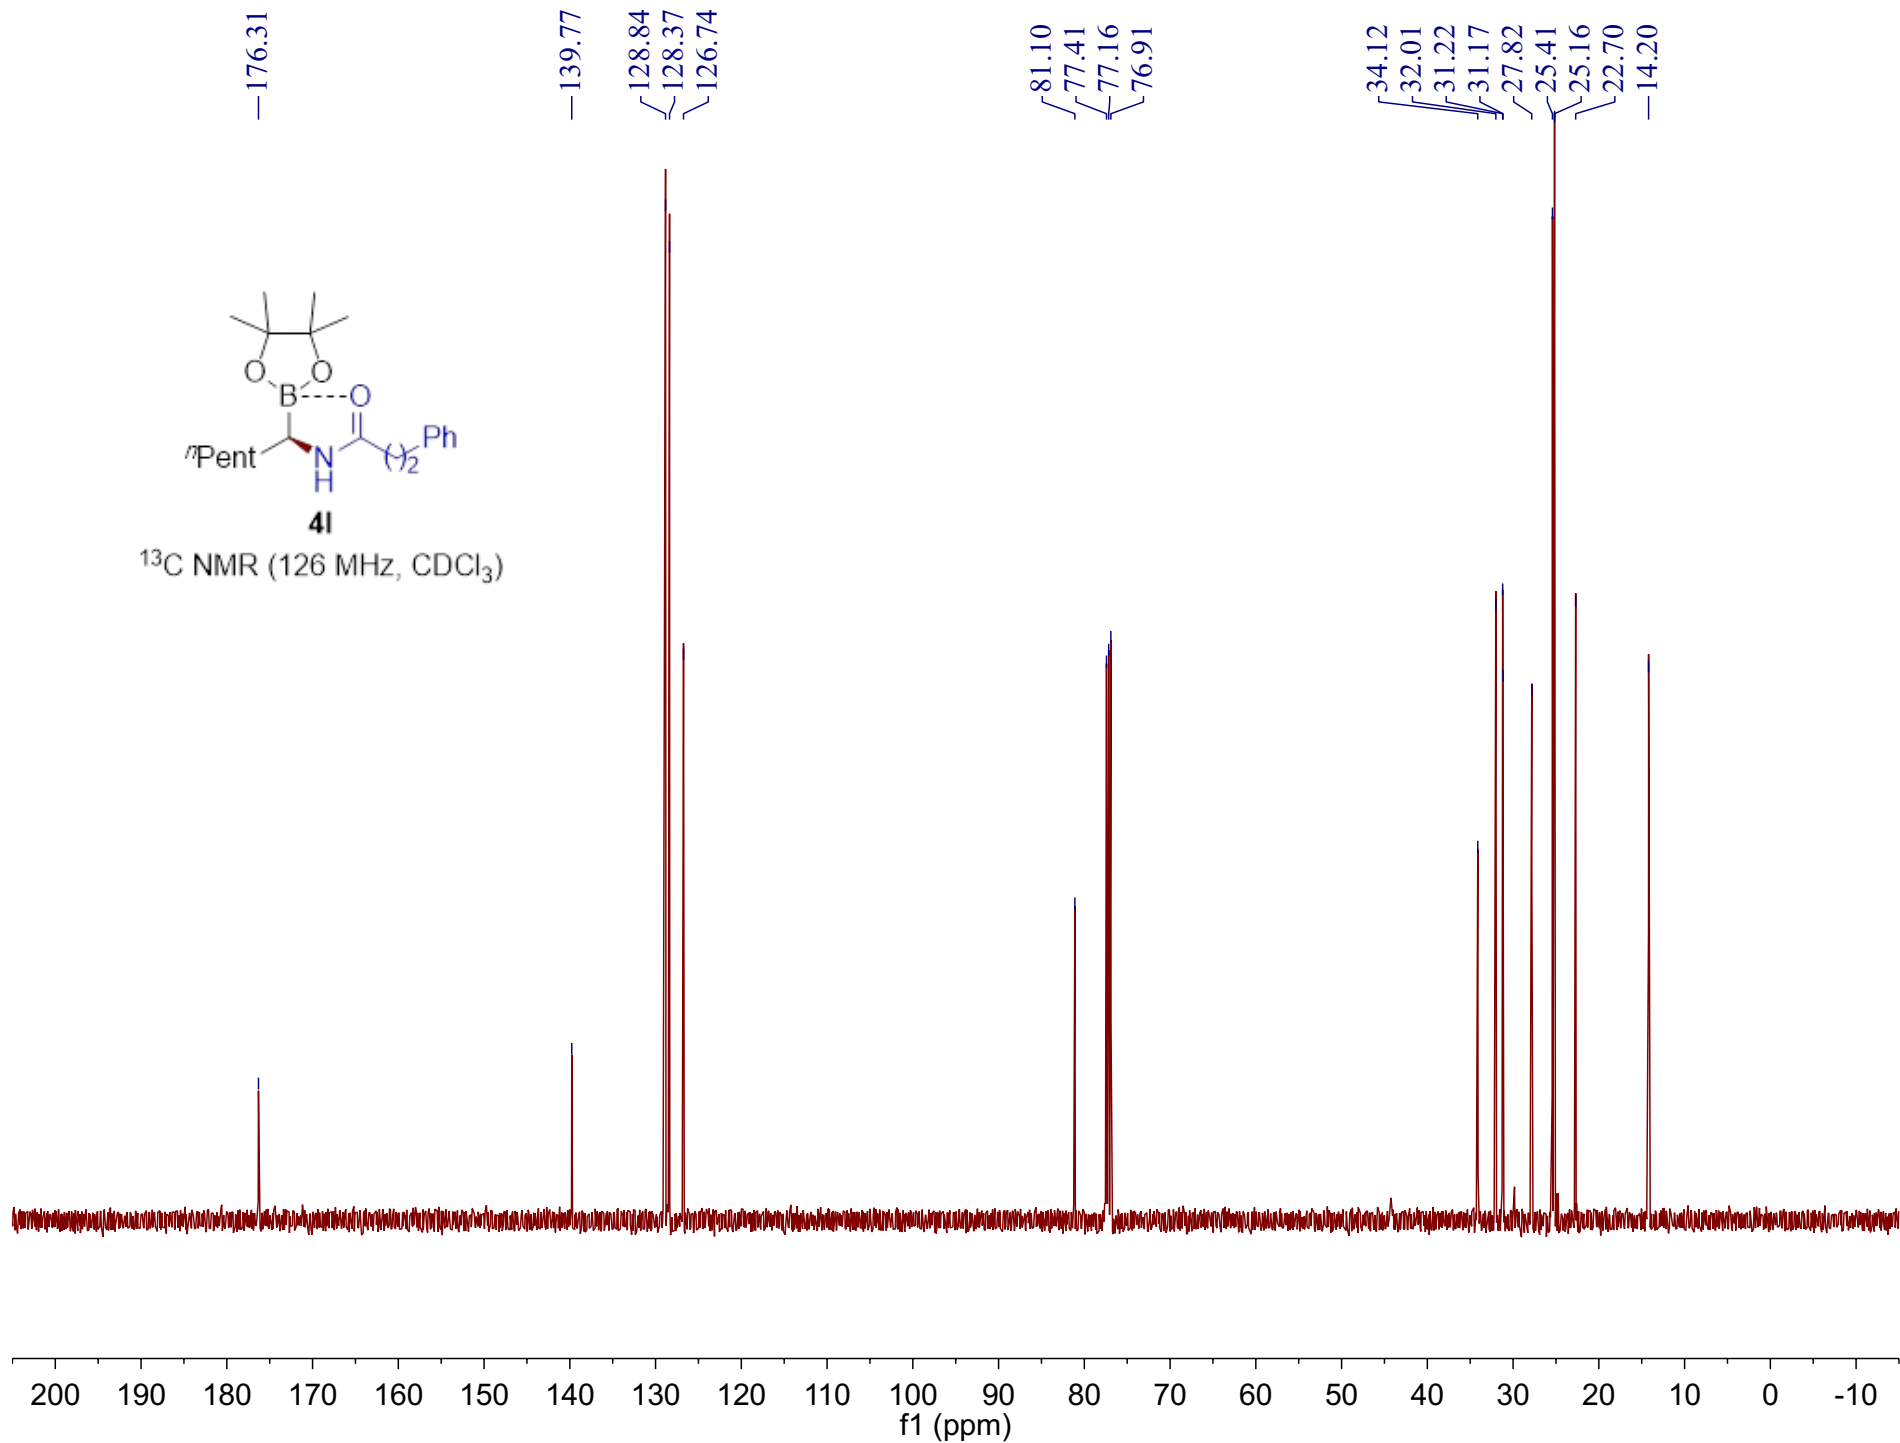

**Supplementary Figure 90:**  $^{13}\text{C}$  NMR (126 MHz,  $\text{CDCl}_3$ ) spectrum of **4l**.

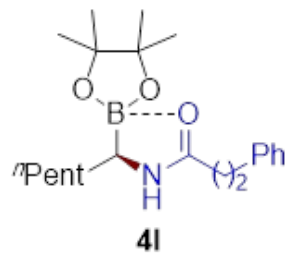

$^{11}\text{B}$  NMR (160 MHz,  $\text{CDCl}_3$ )

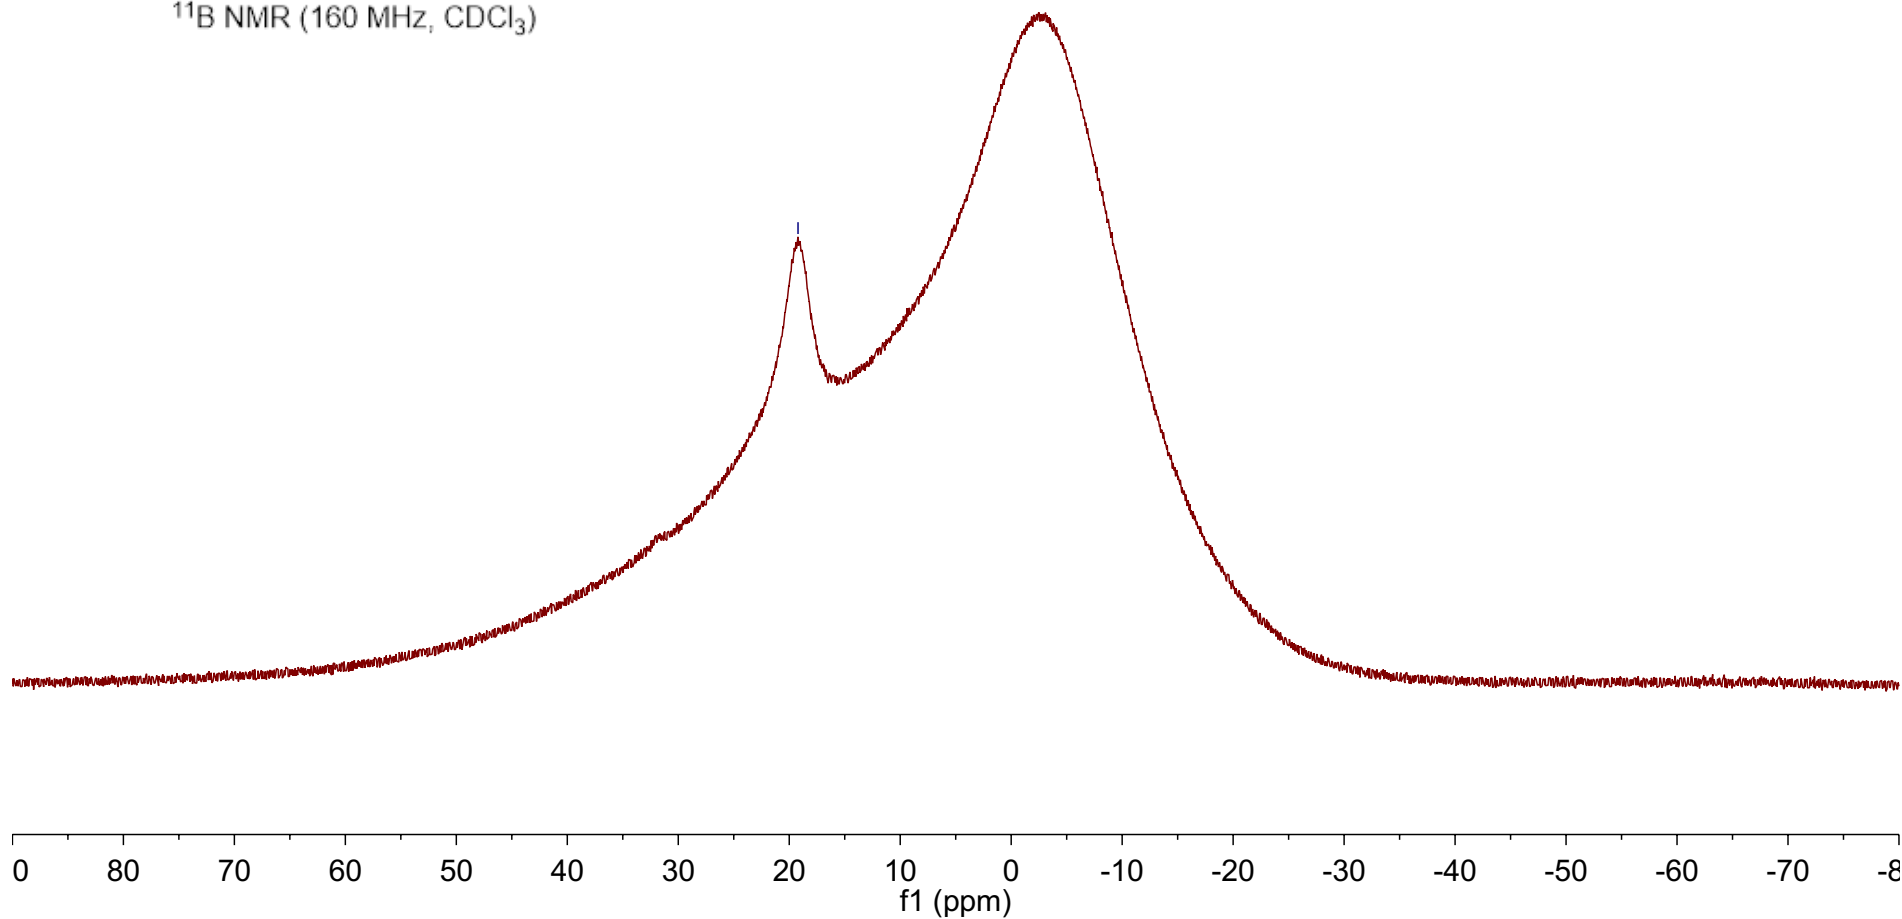

**Supplementary Figure 91:**  $^{11}\text{B}$  NMR (160 MHz,  $\text{CDCl}_3$ ) spectrum of **4l**.

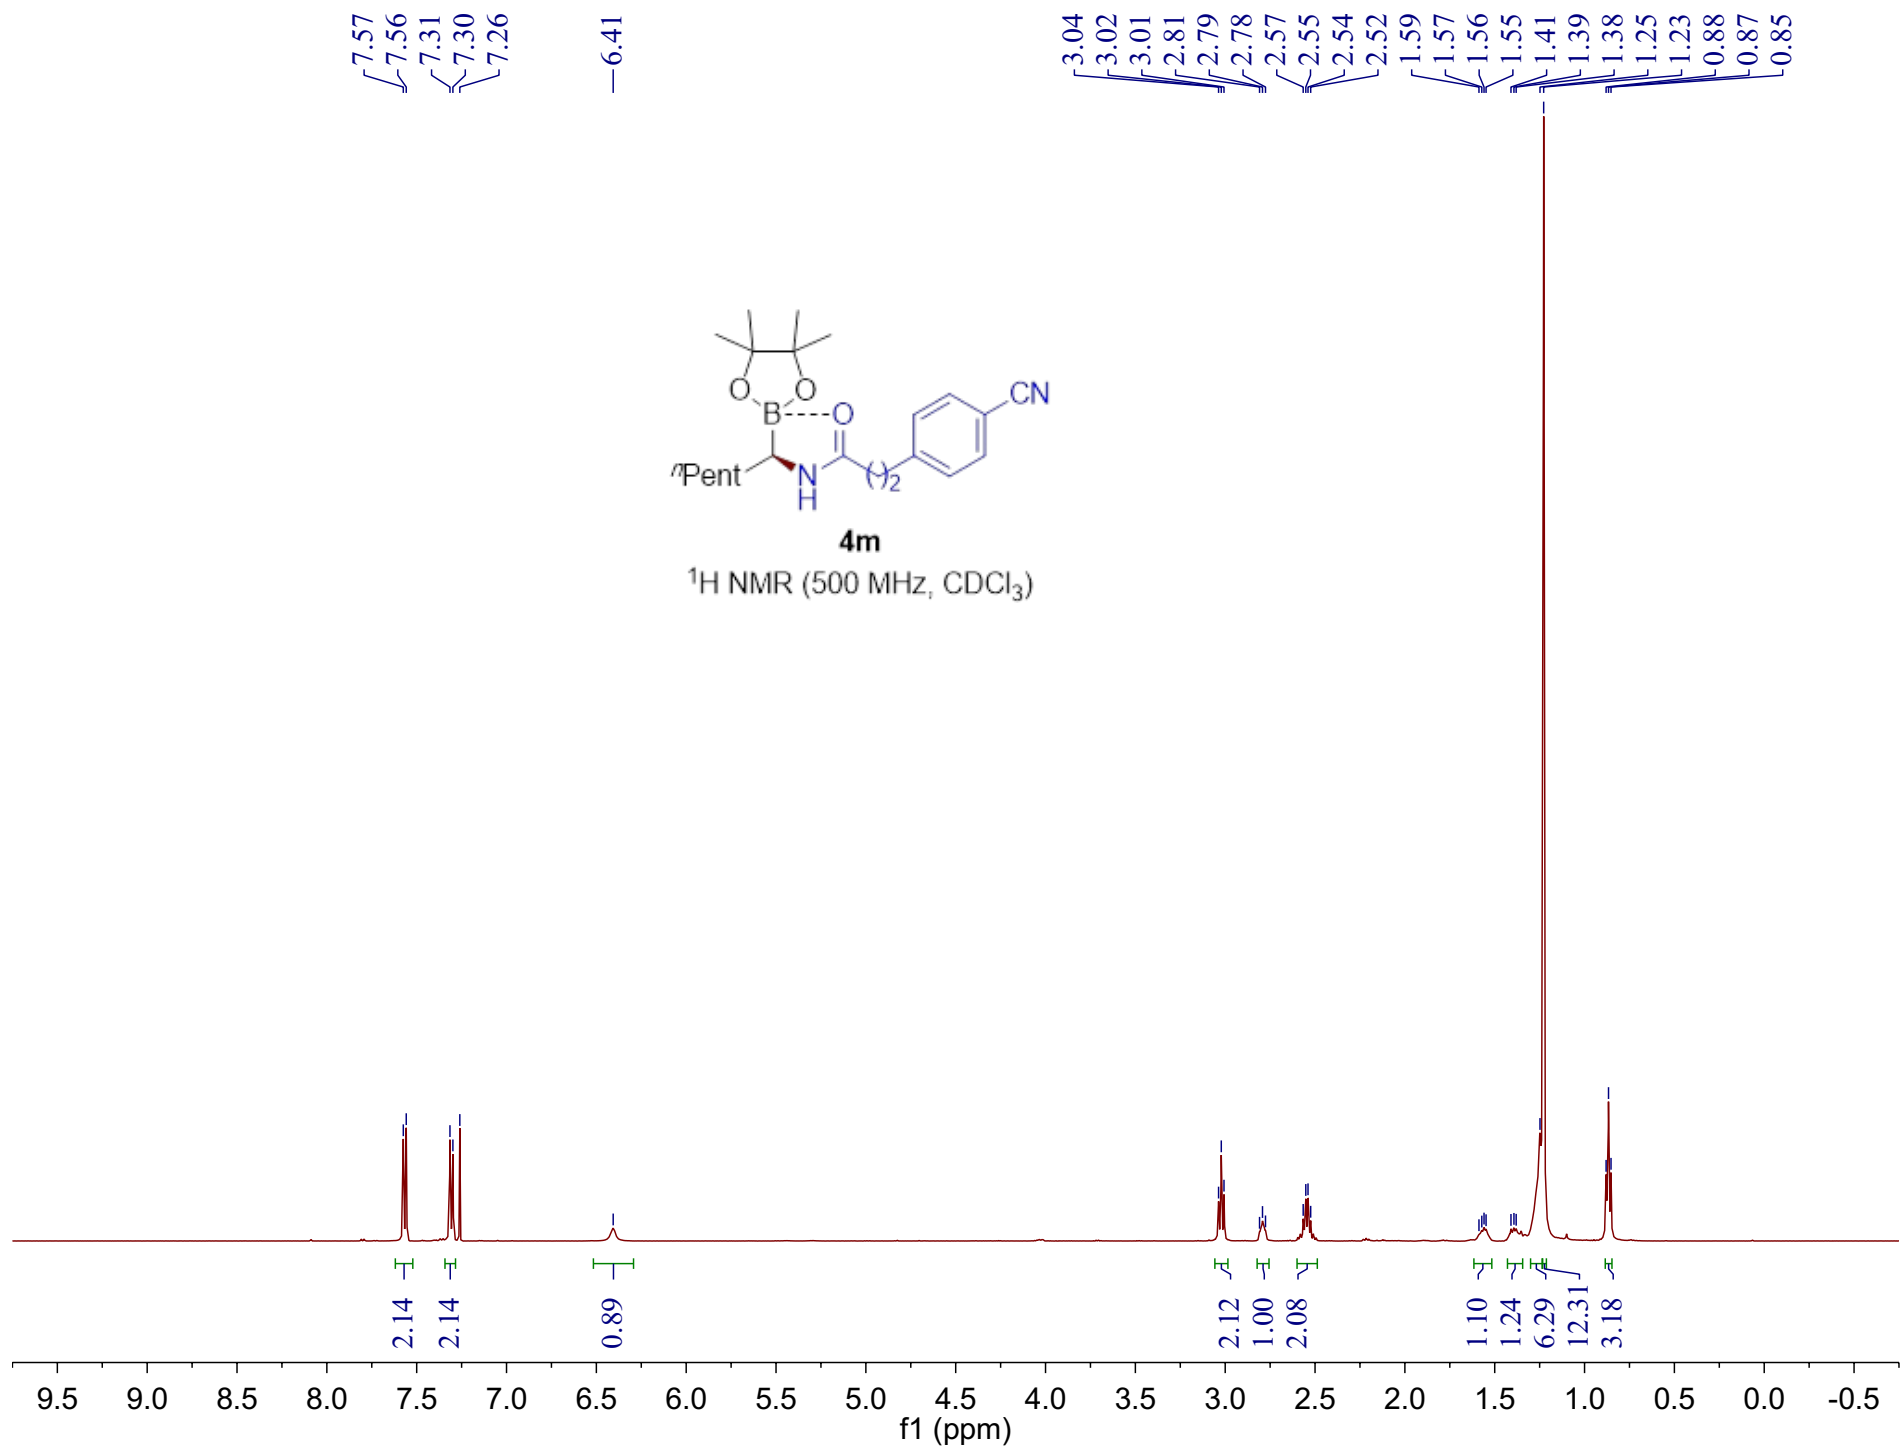

Supplementary Figure 92: <sup>1</sup>H NMR (500 MHz, CDCl<sub>3</sub>) spectrum of **4m**.

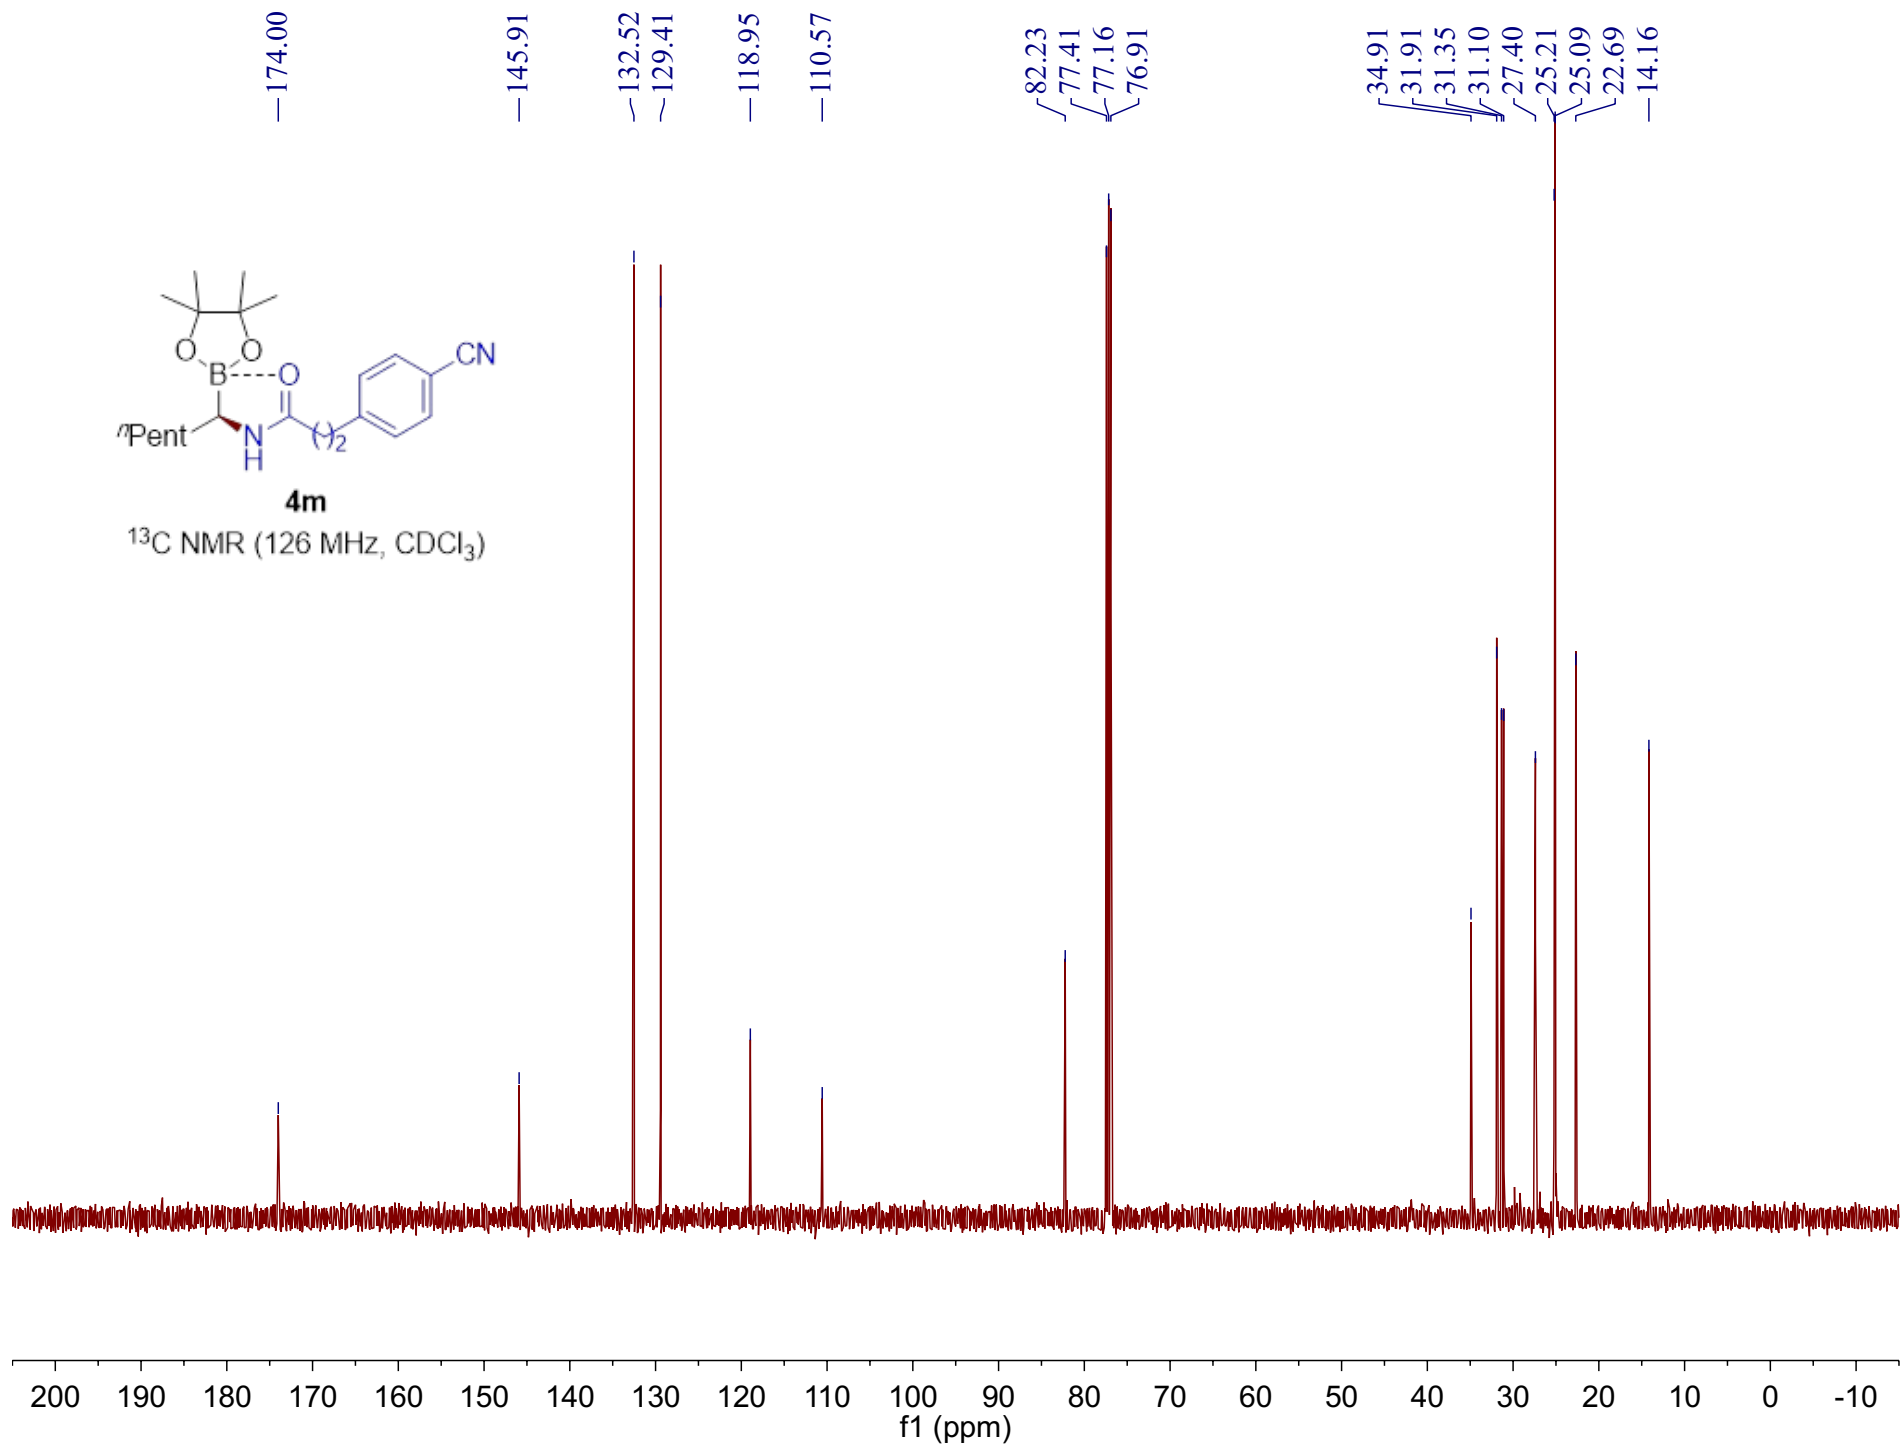

Supplementary Figure 93: <sup>13</sup>C NMR (126 MHz, CDCl<sub>3</sub>) spectrum of **4m**.

-23.70

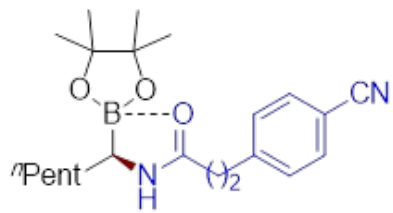

**4m**

$^{11}\text{B}$  NMR (160 MHz,  $\text{CDCl}_3$ )

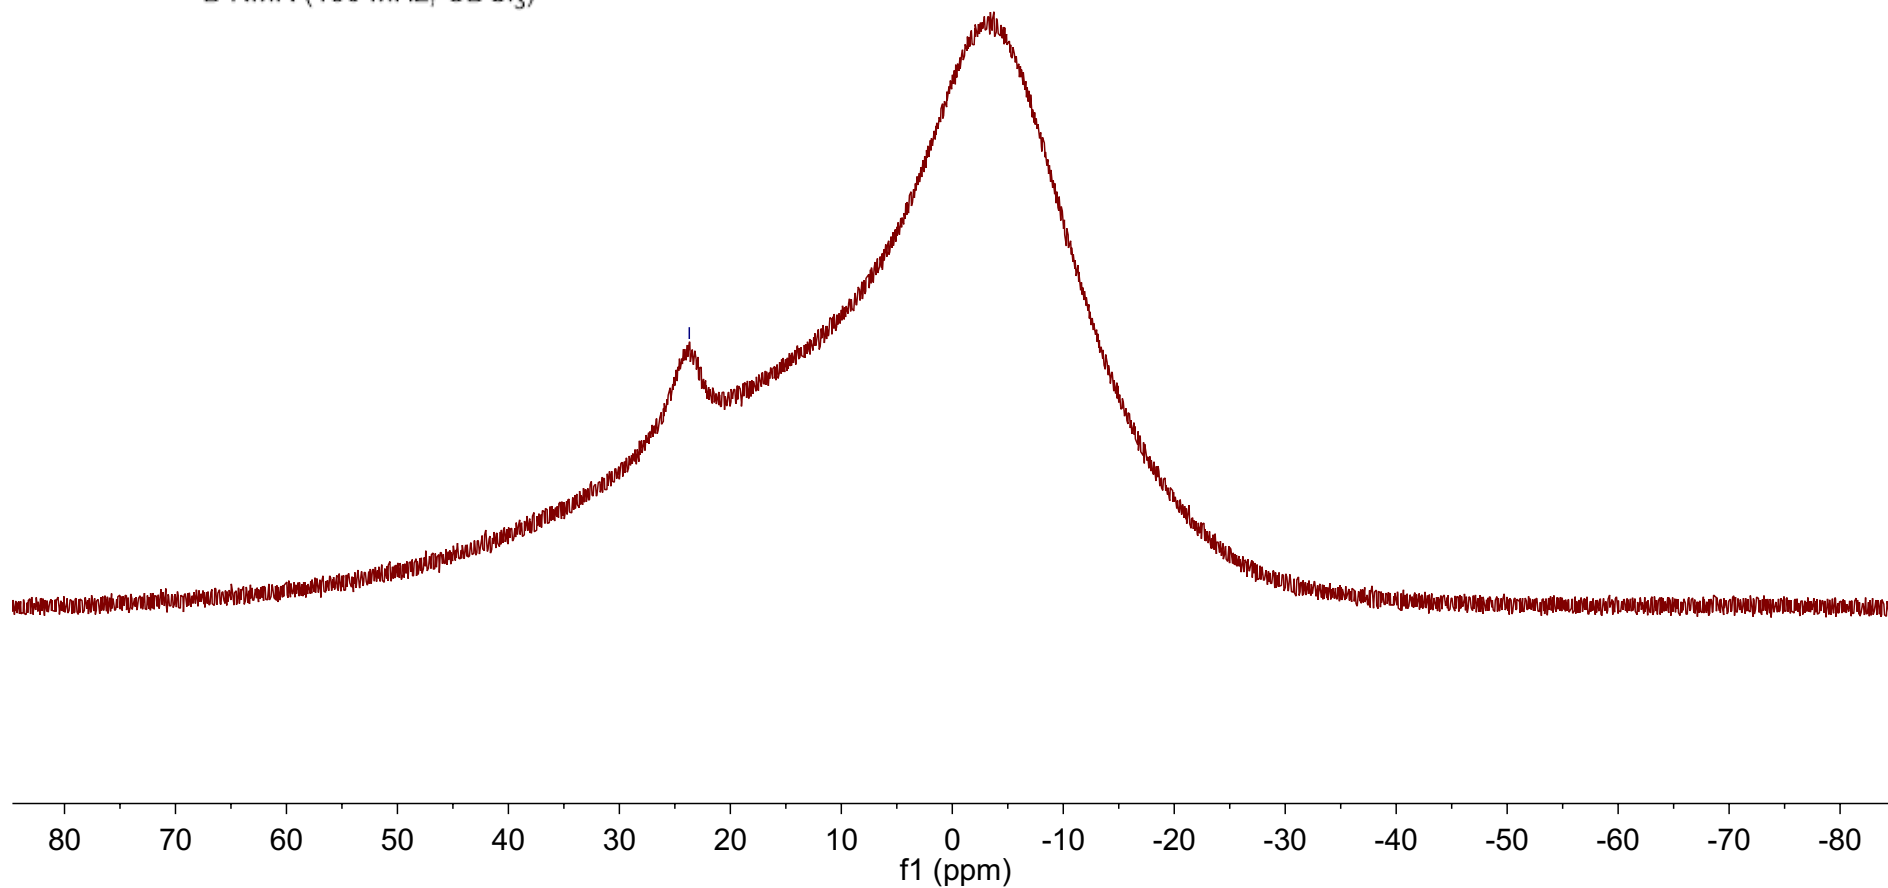

**Supplementary Figure 94:**  $^{11}\text{B}$  NMR (160 MHz,  $\text{CDCl}_3$ ) spectrum of **4m**.

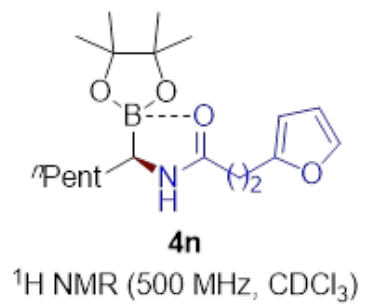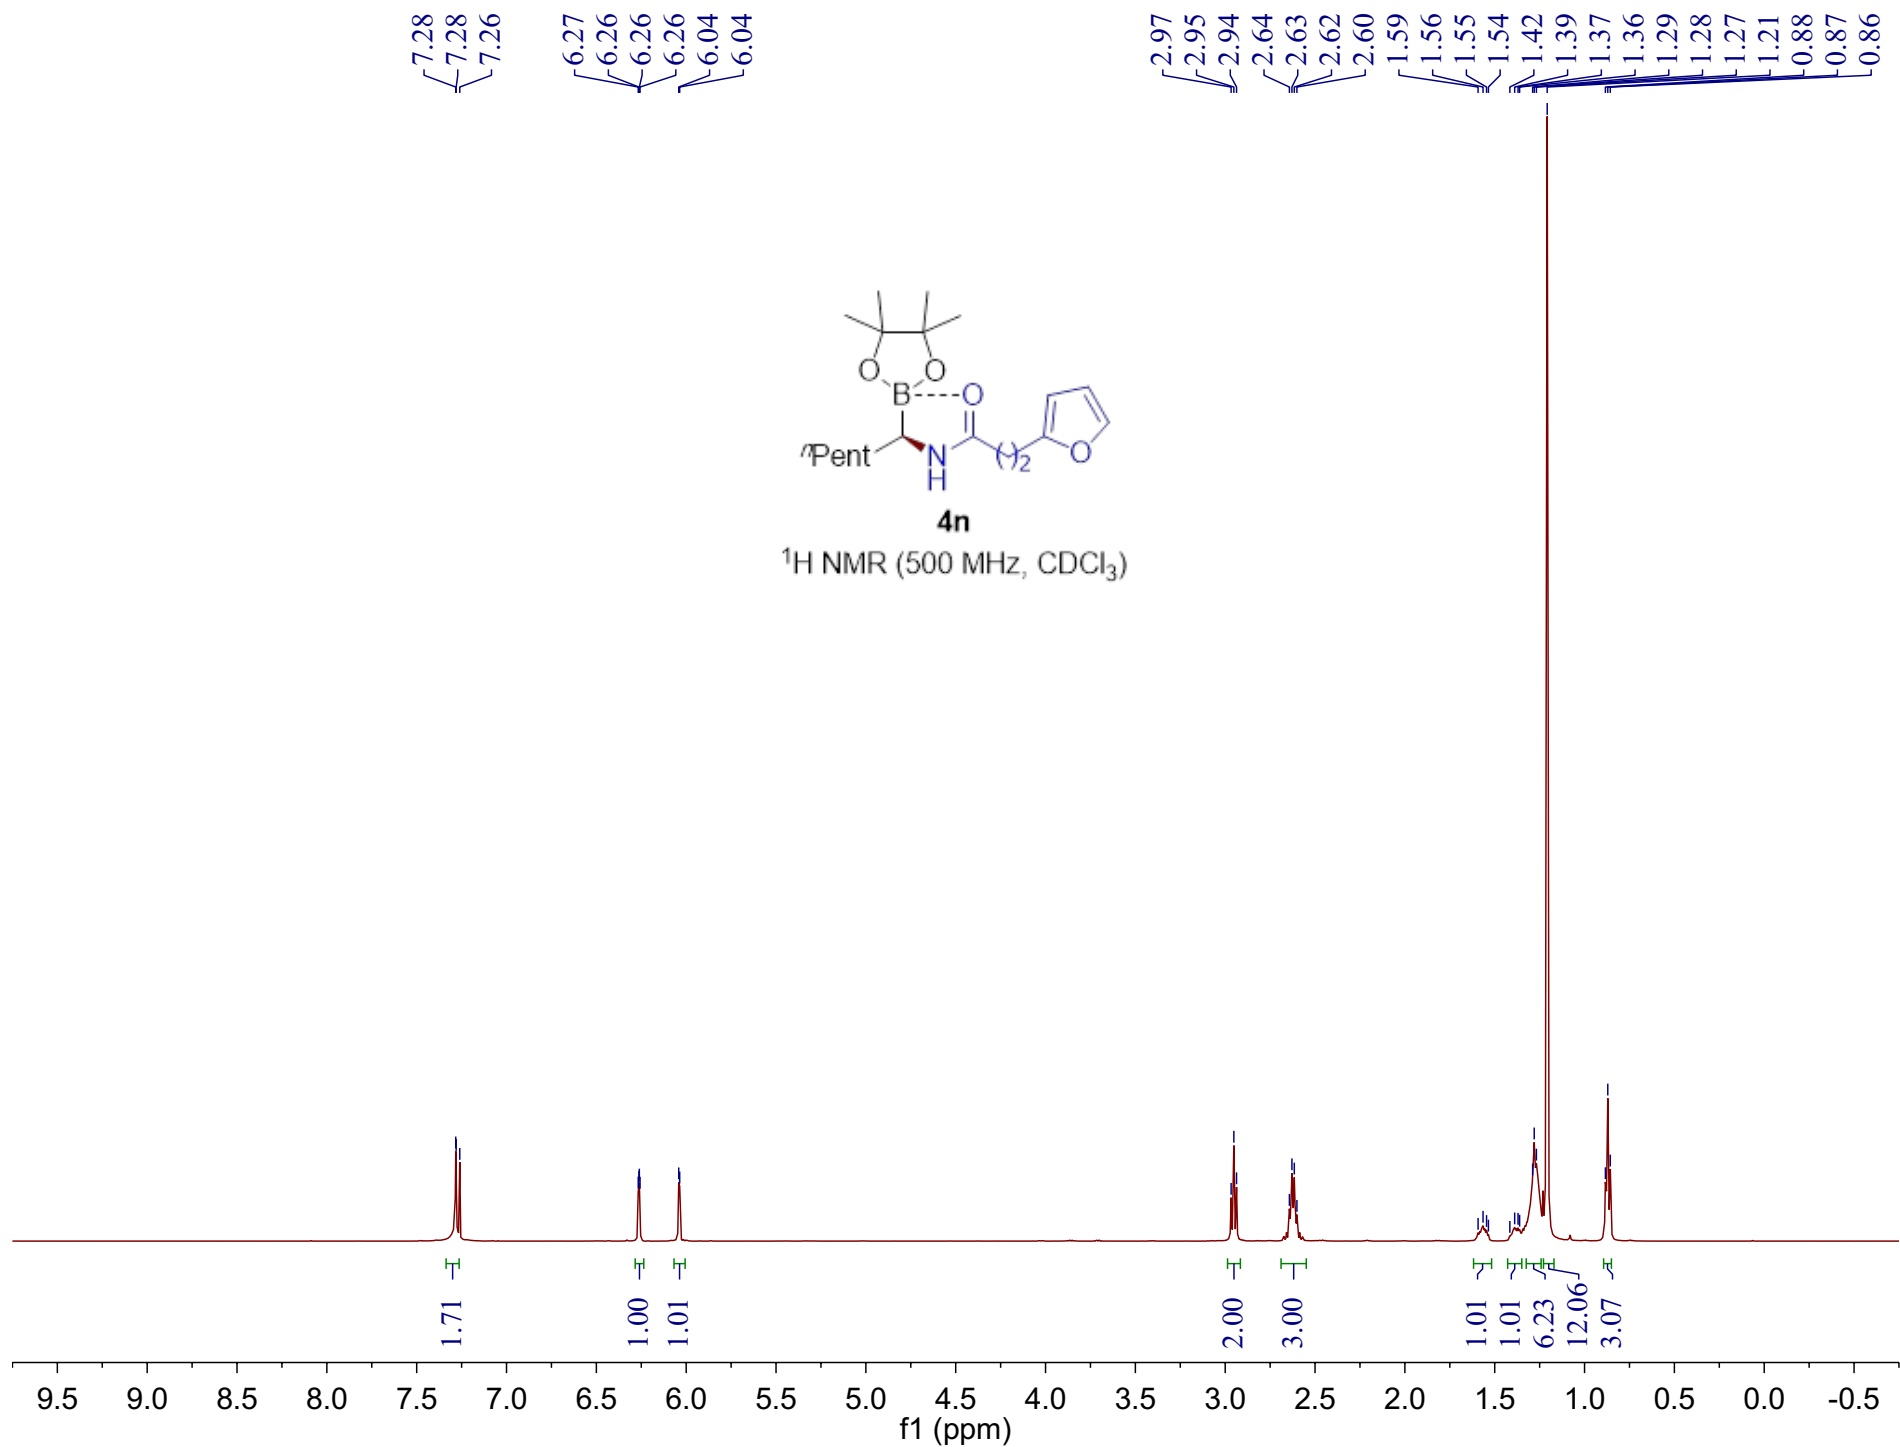

Supplementary Figure 95: <sup>1</sup>H NMR (500 MHz, CDCl<sub>3</sub>) spectrum of **4n**.

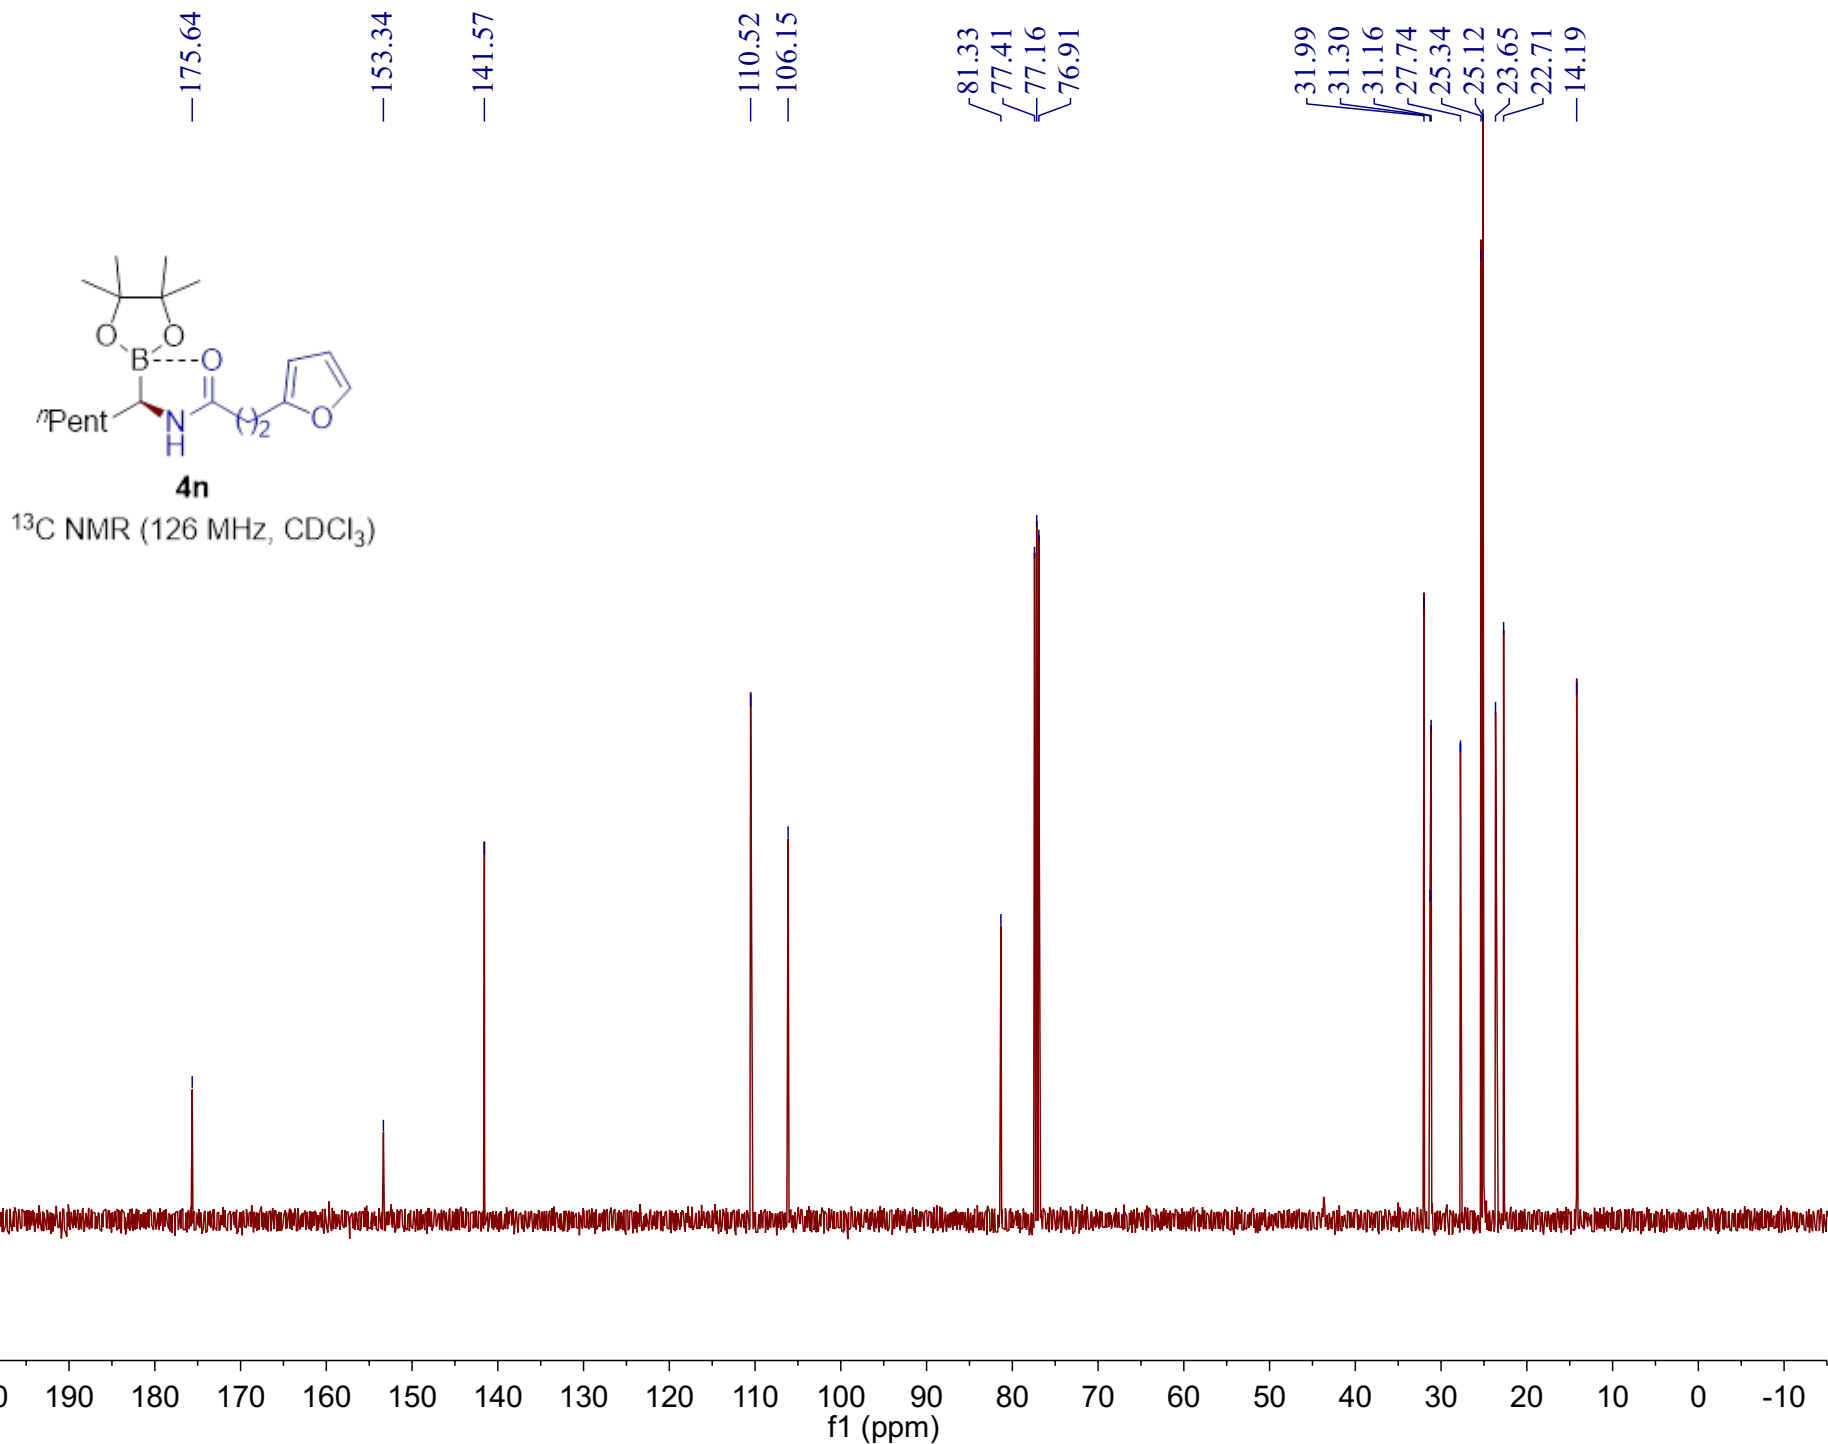

Supplementary Figure 96: <sup>13</sup>C NMR (126 MHz, CDCl<sub>3</sub>) spectrum of **4n**.



-19.92

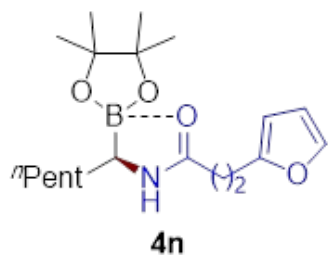

$^{11}\text{B}$  NMR (160 MHz,  $\text{CDCl}_3$ )

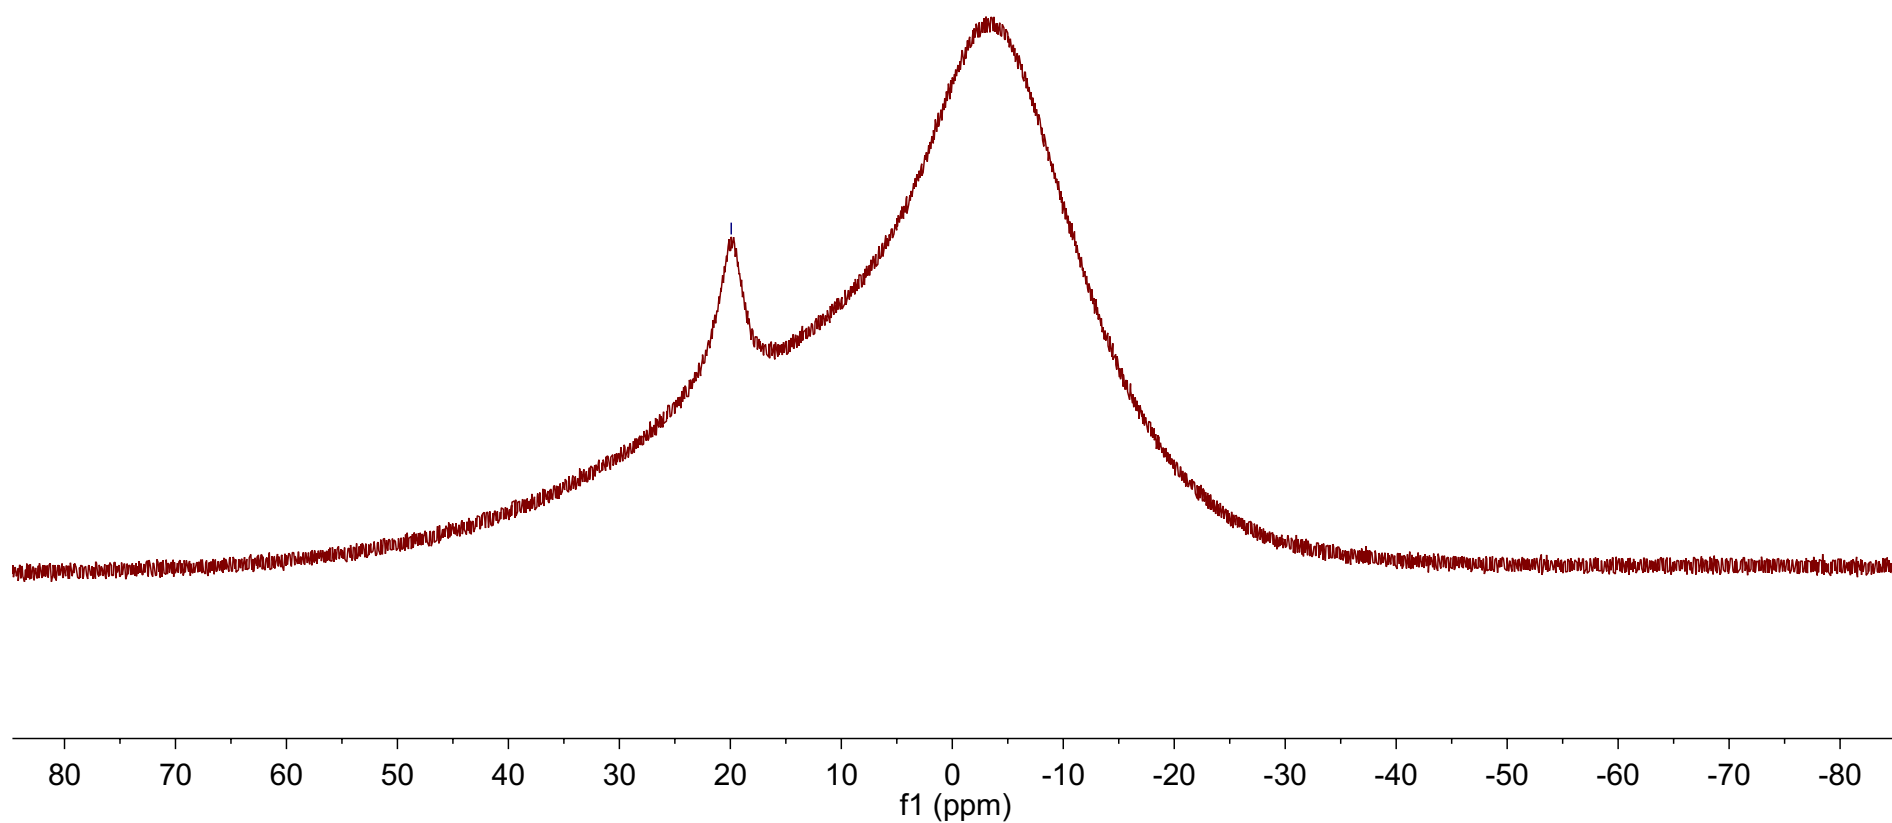

Supplementary Figure 97:  $^{11}\text{B}$  NMR (160 MHz,  $\text{CDCl}_3$ ) spectrum of **4n**.

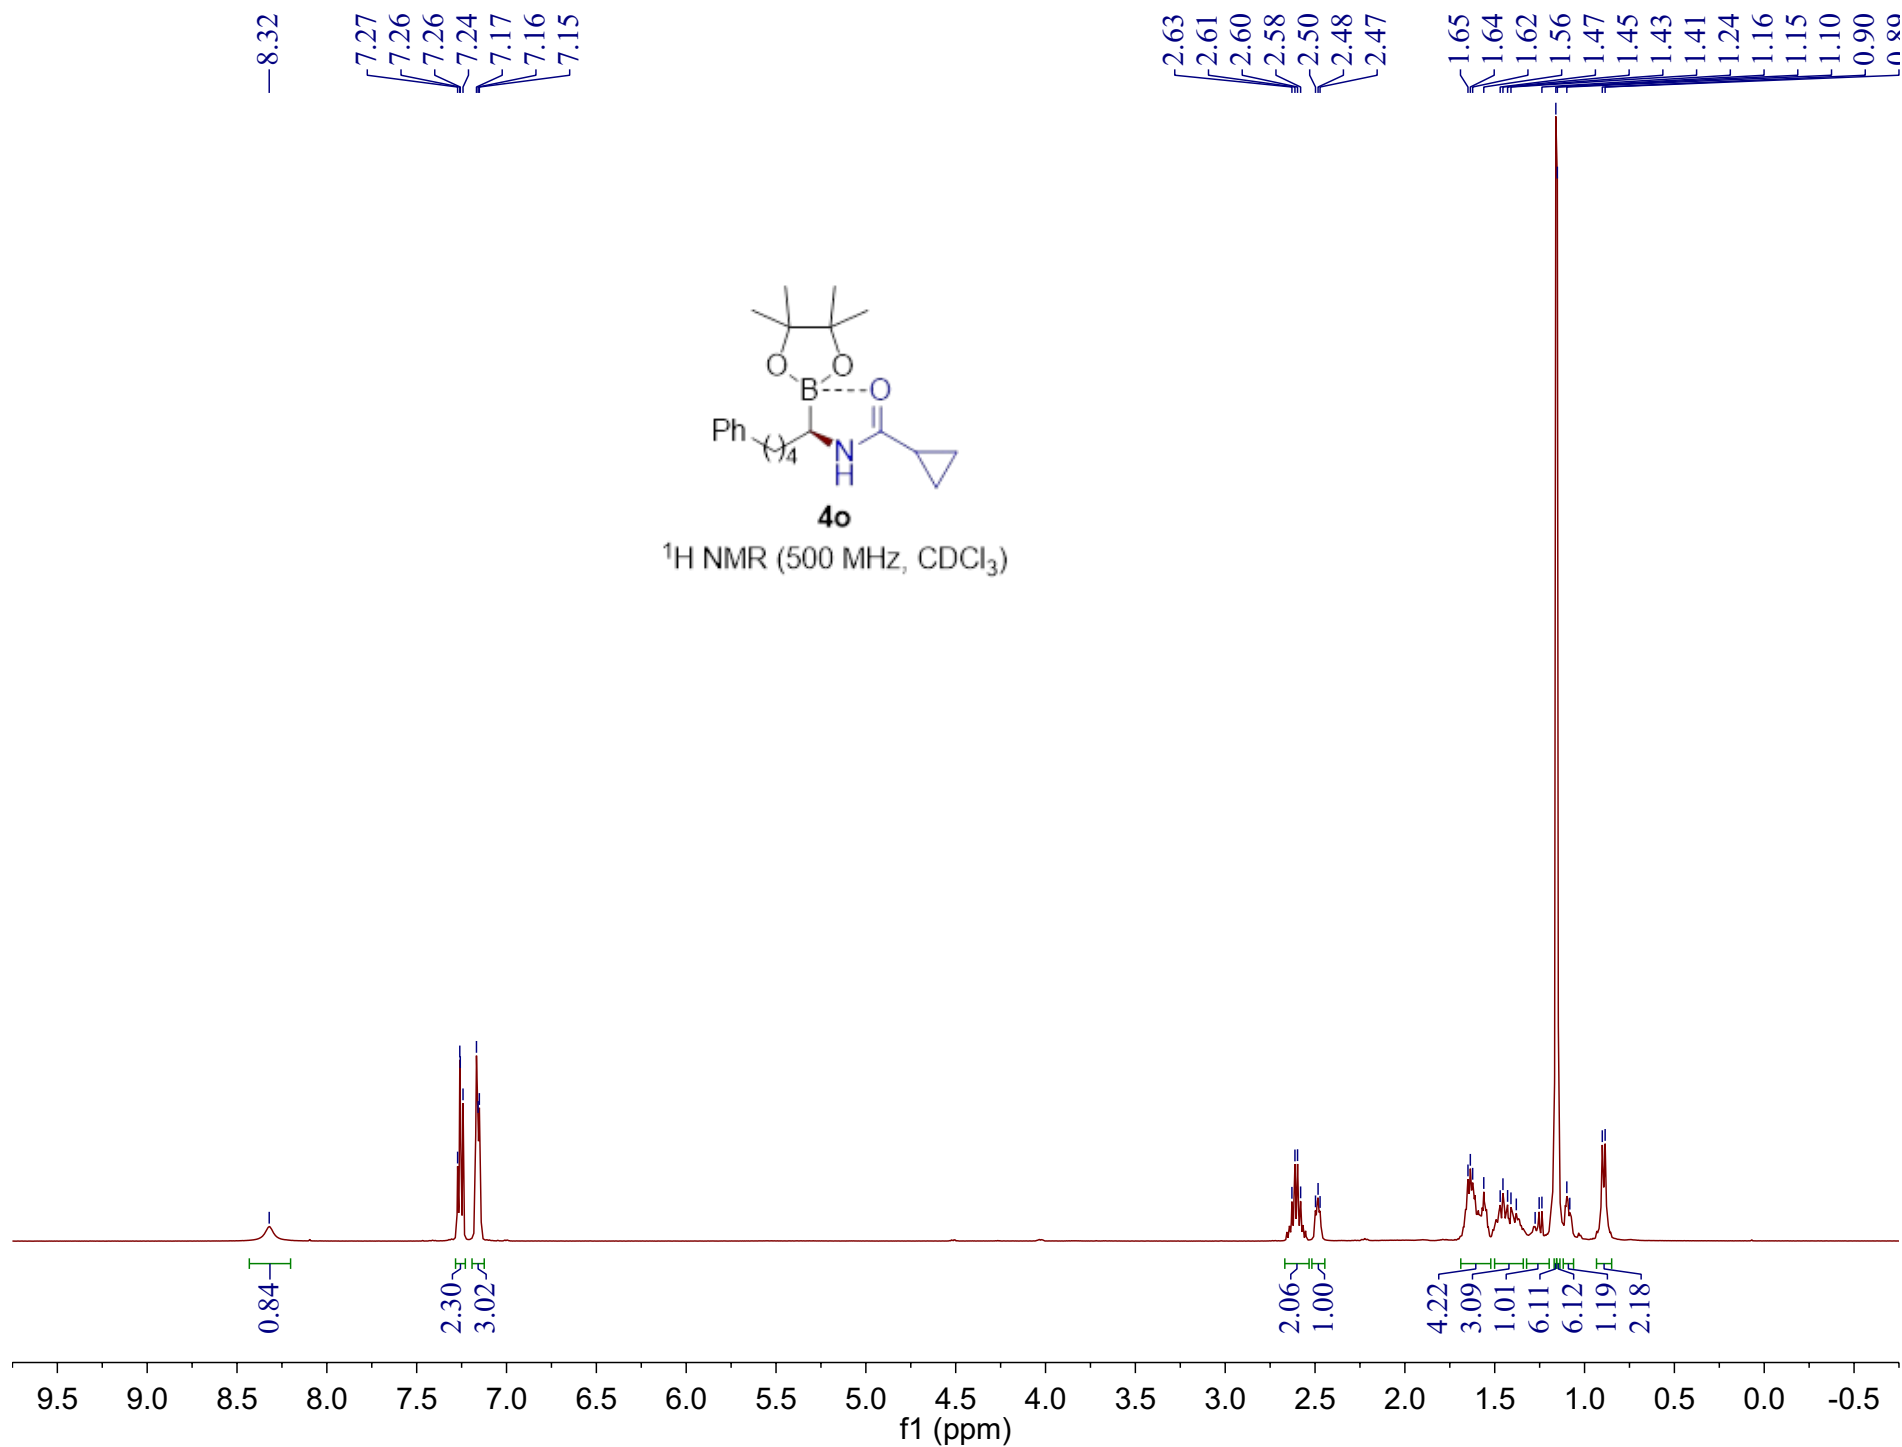

Supplementary Figure 98: <sup>1</sup>H NMR (500 MHz, CDCl<sub>3</sub>) spectrum of **4o**.

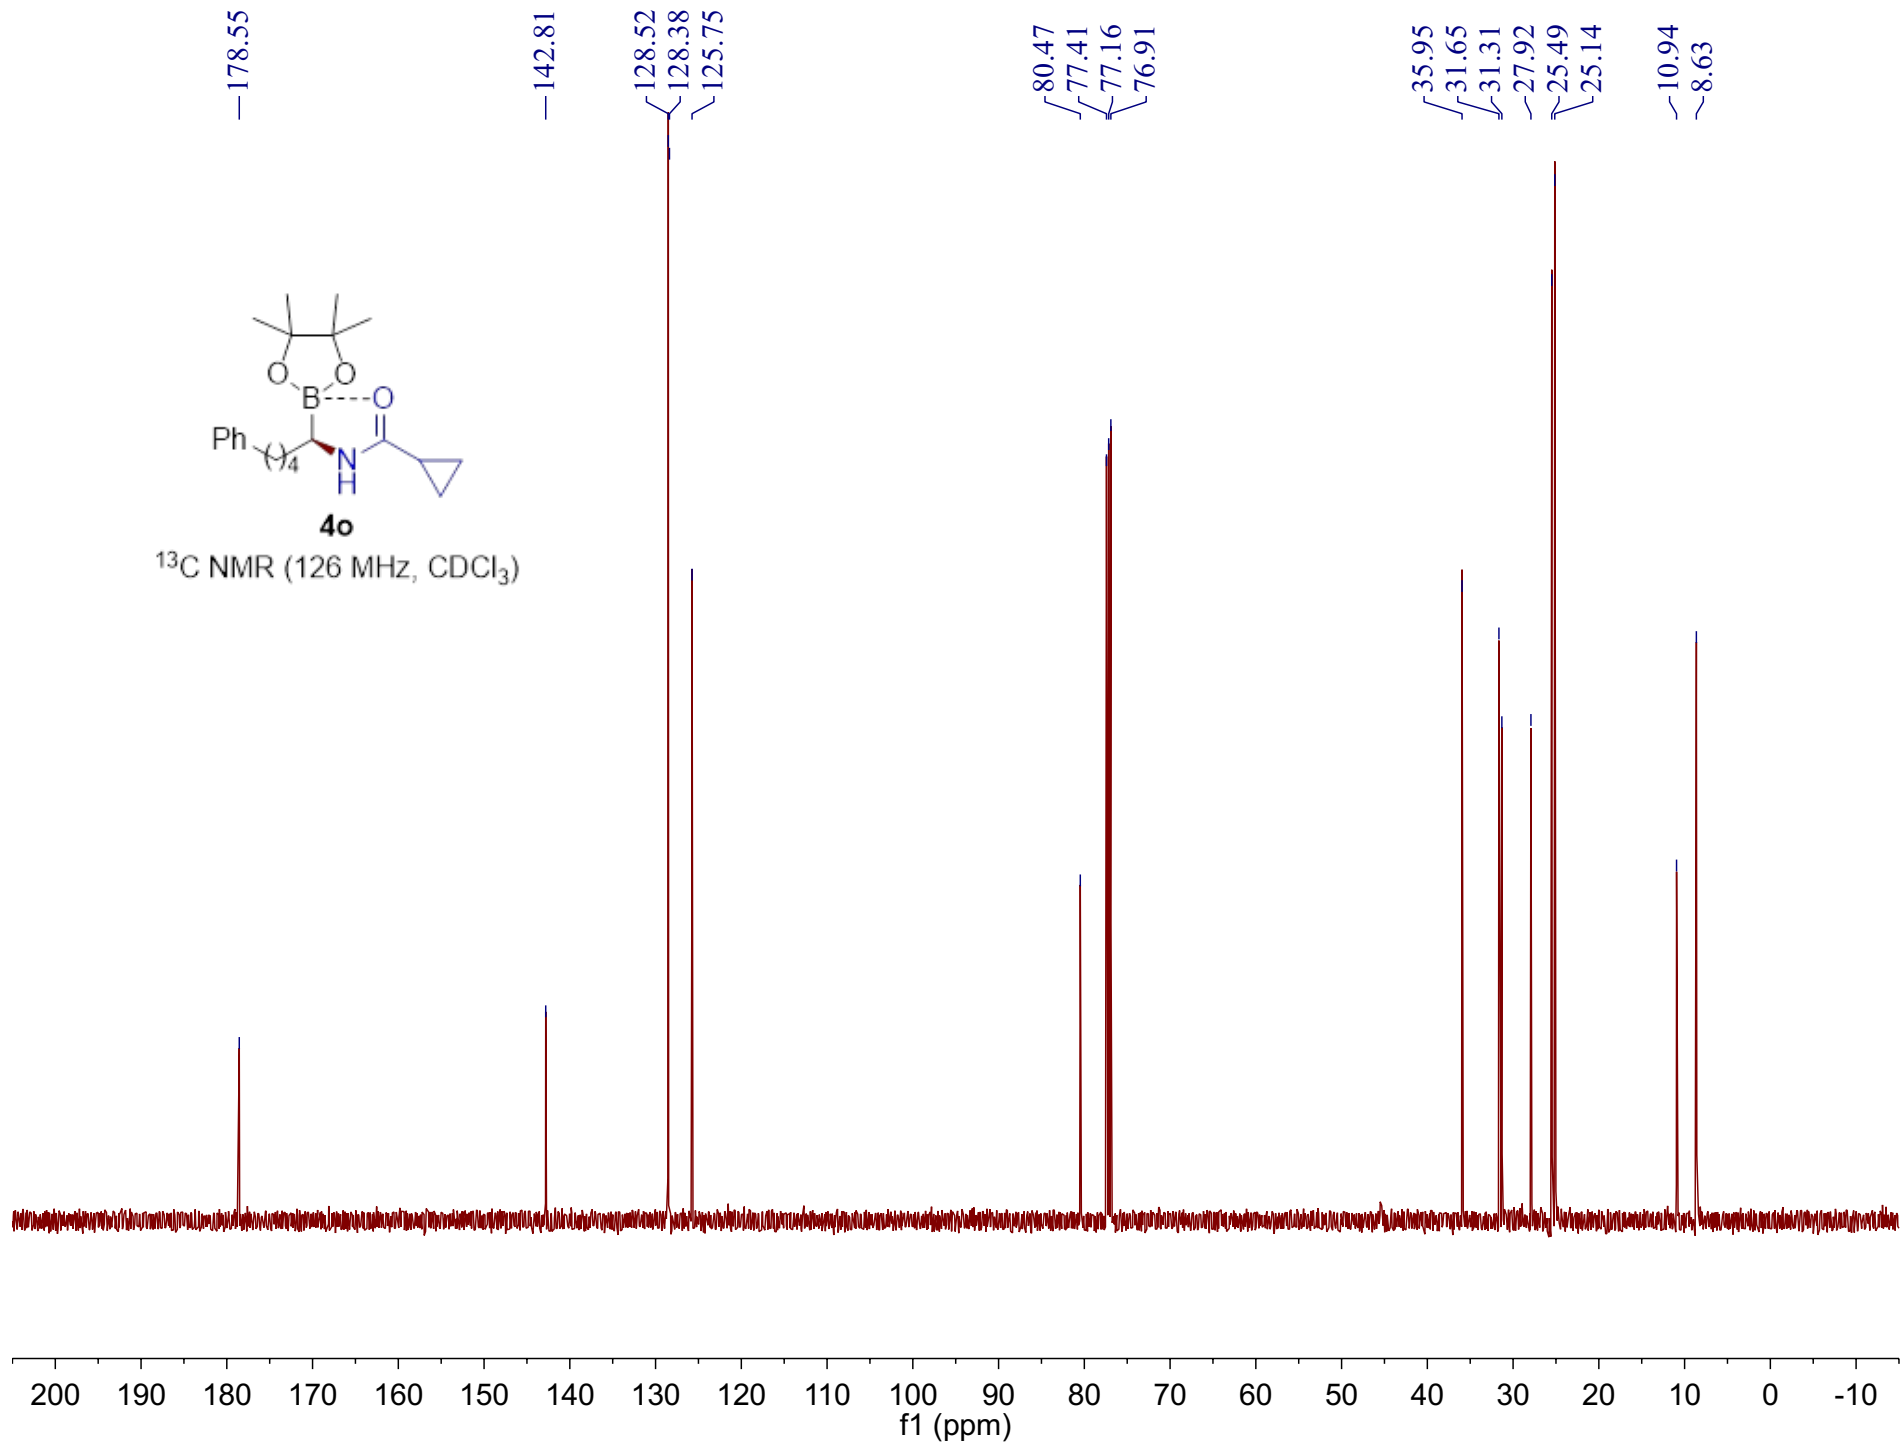

Supplementary Figure 99:  $^{13}\text{C}$  NMR (126 MHz,  $\text{CDCl}_3$ ) spectrum of **4o**.

—16.17

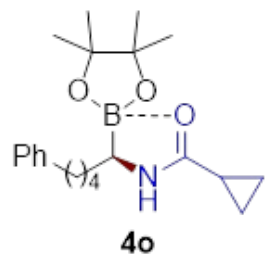

$^{11}\text{B}$  NMR (160 MHz,  $\text{CDCl}_3$ )

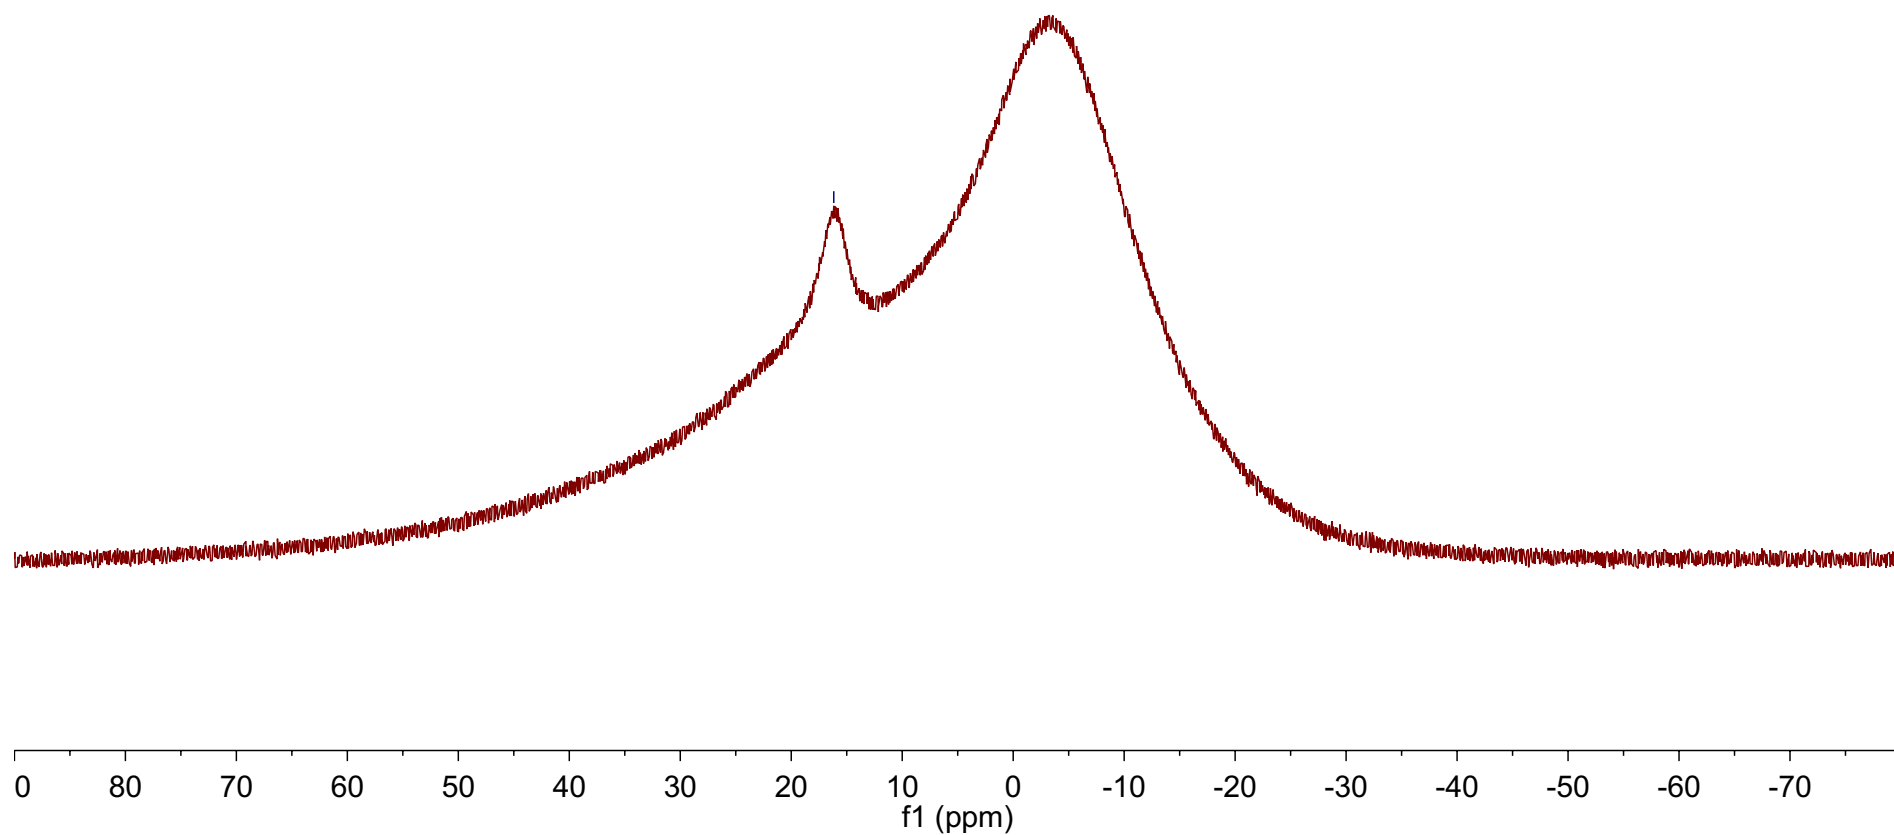

Supplementary Figure 100:  $^{11}\text{B}$  NMR (160 MHz,  $\text{CDCl}_3$ ) spectrum of **4o**.

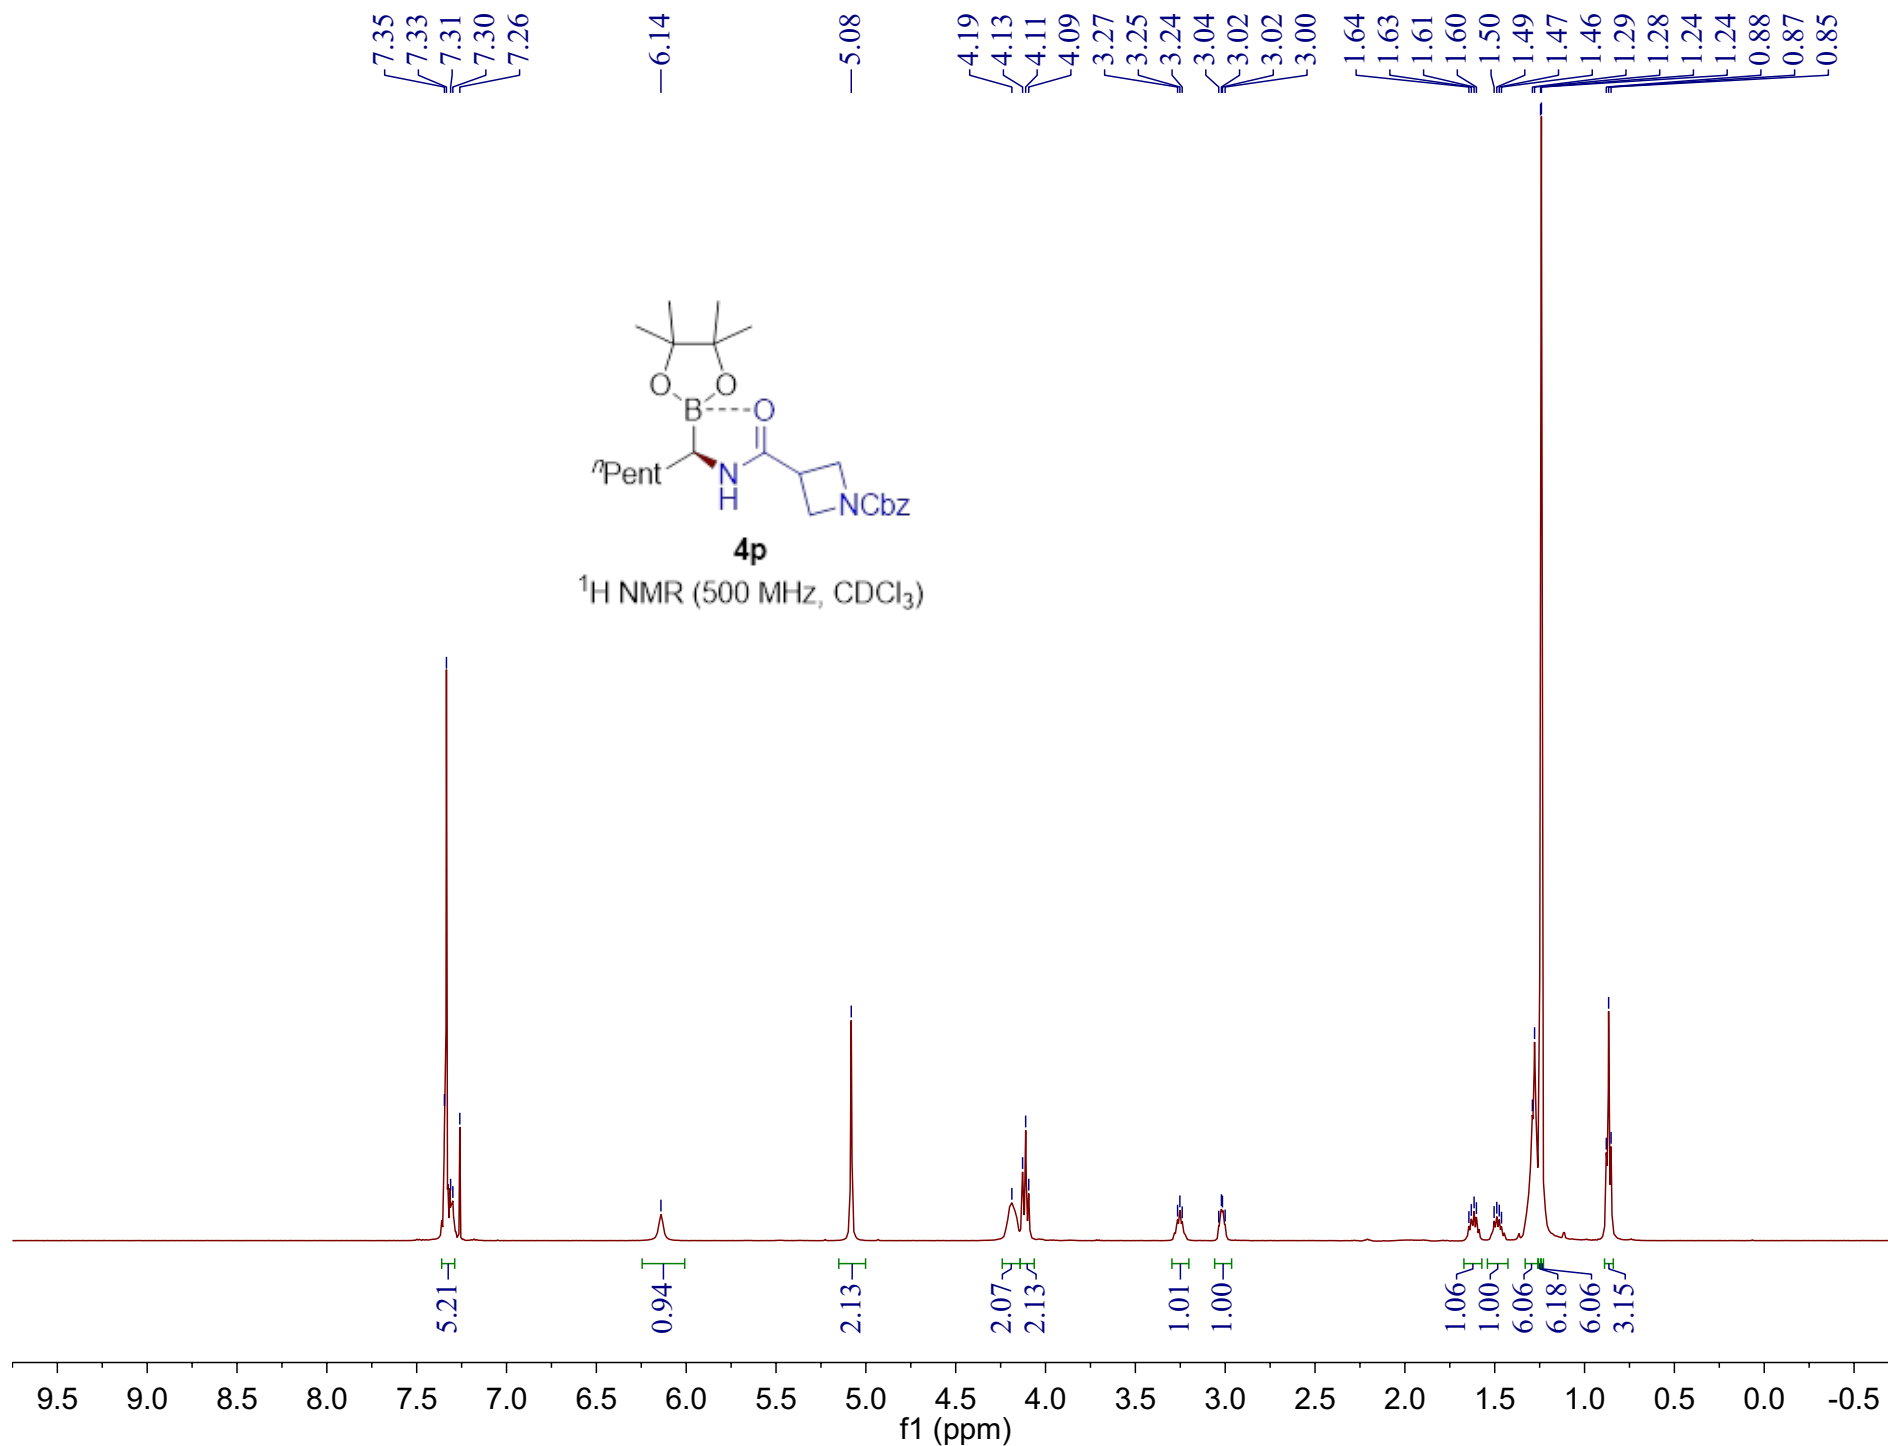

Supplementary Figure 101: <sup>1</sup>H NMR (500 MHz, CDCl<sub>3</sub>) spectrum of **4p**.

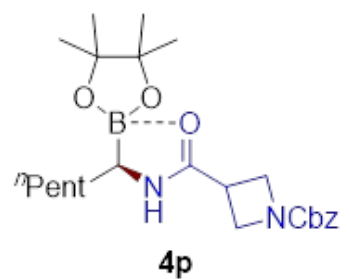

<sup>13</sup>C NMR (126 MHz, CDCl<sub>3</sub>)

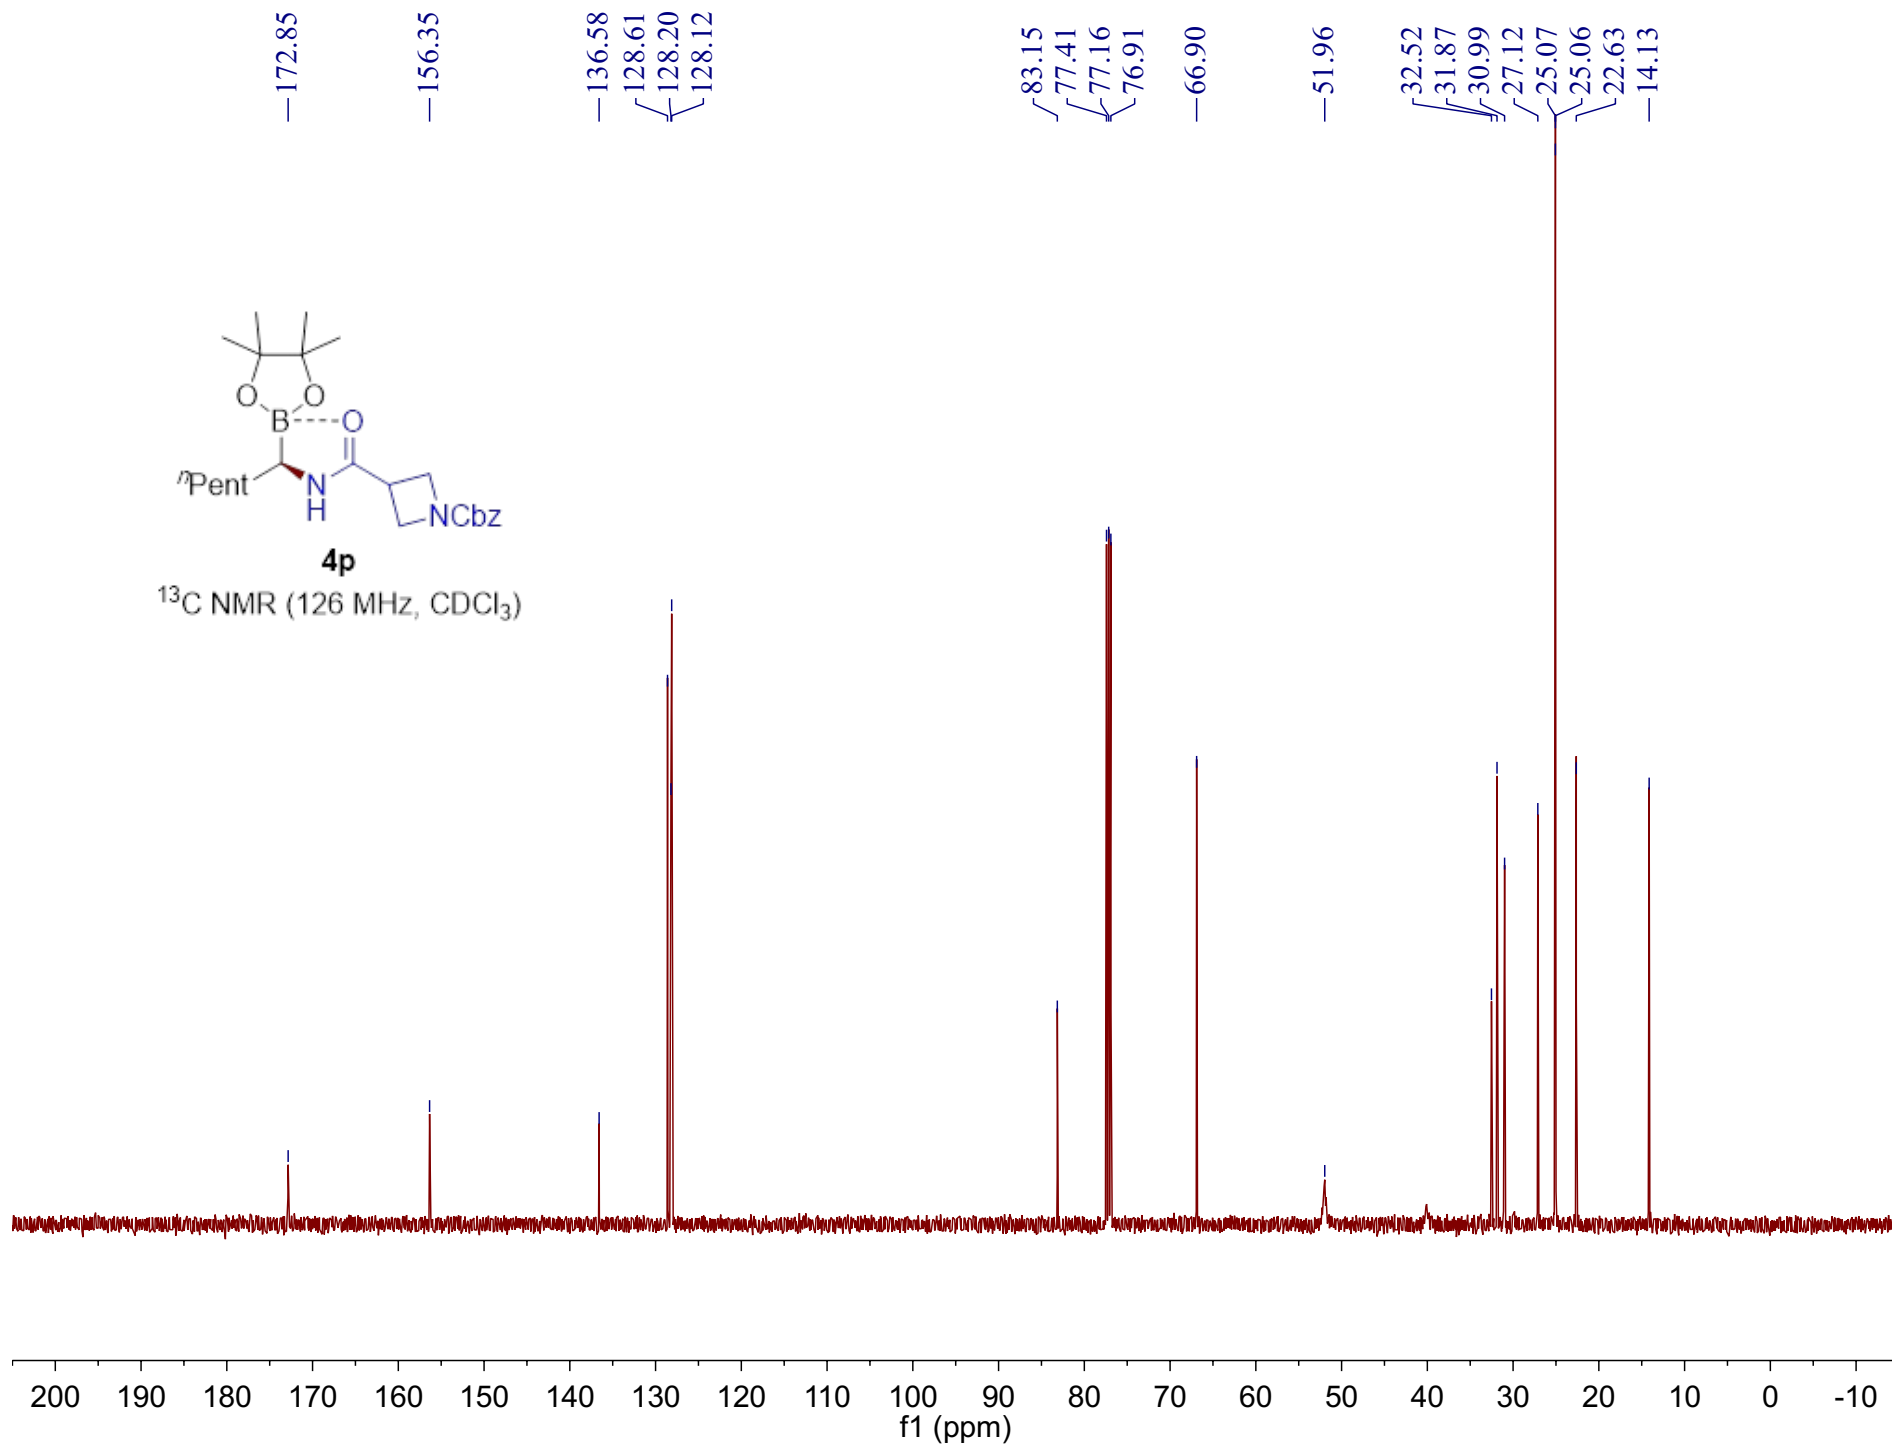

Supplementary Figure 102: <sup>13</sup>C NMR (126 MHz, CDCl<sub>3</sub>) spectrum of **4p**.

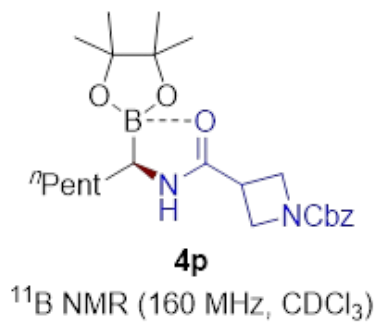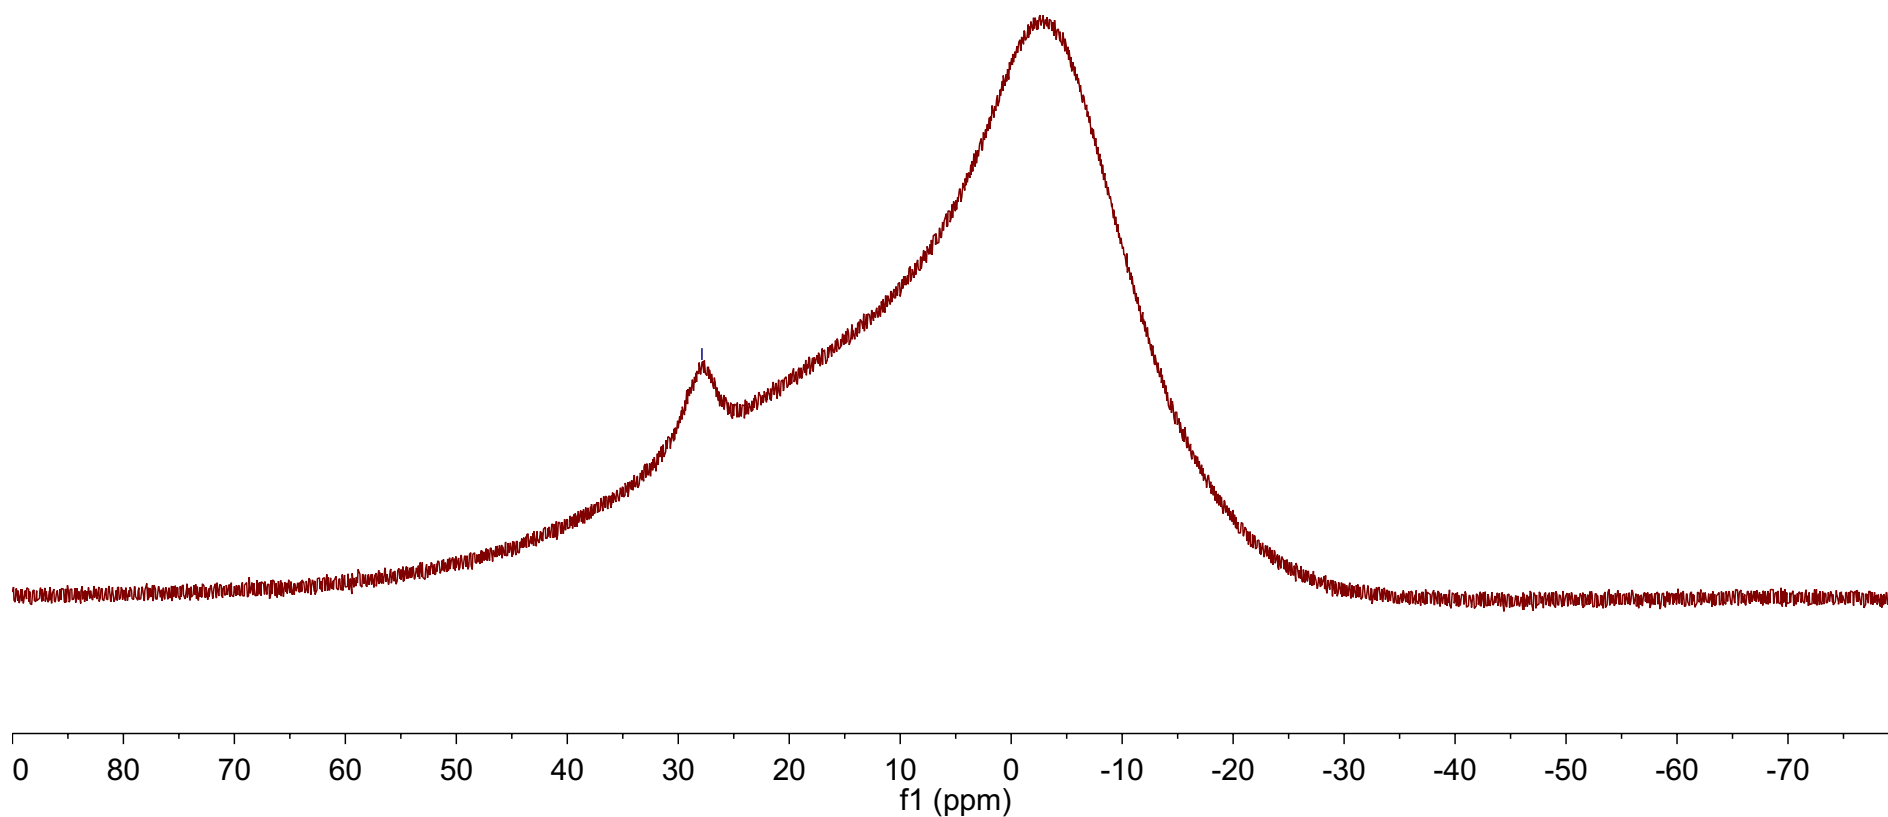

Supplementary Figure 103: <sup>11</sup>B NMR (160 MHz, CDCl<sub>3</sub>) spectrum of 4p.

7.35  
7.33  
7.33  
7.32  
7.31  
7.29  
7.28  
7.28  
7.27  
7.26  
7.10

4.48

3.50  
3.49  
3.48

2.55  
2.21  
2.19  
1.87  
1.84  
1.77  
1.75  
1.66  
1.65  
1.61  
1.59  
1.47  
1.44  
1.42  
1.37  
1.34  
1.33  
1.27  
1.25  
1.22  
1.10

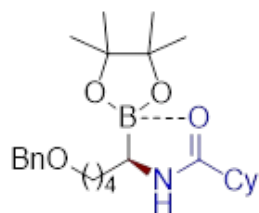

**4q**

<sup>1</sup>H NMR (500 MHz, CDCl<sub>3</sub>)

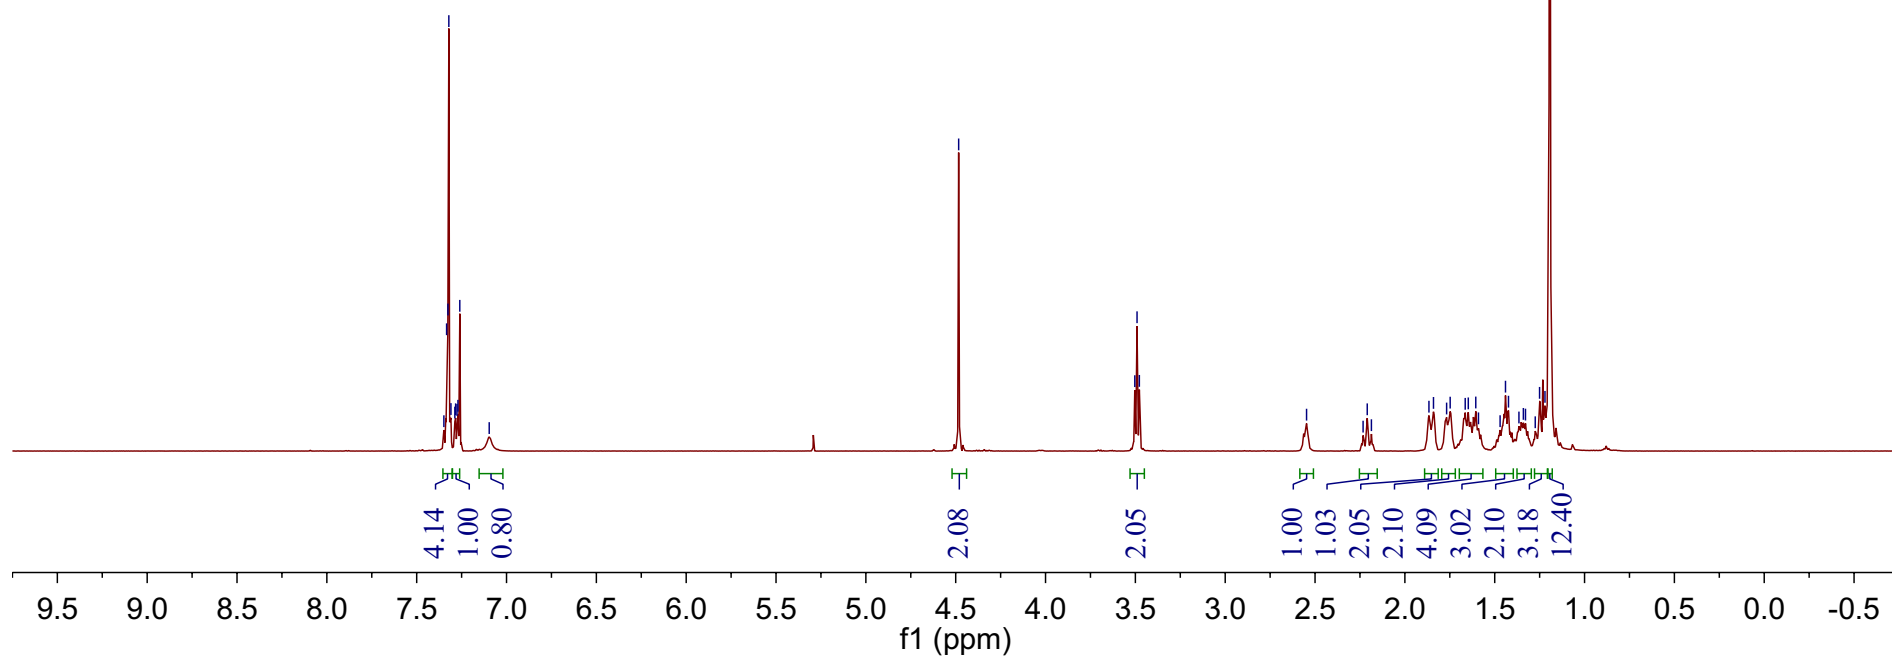

Supplementary Figure 104: <sup>1</sup>H NMR (500 MHz, CDCl<sub>3</sub>) spectrum of **4q**.



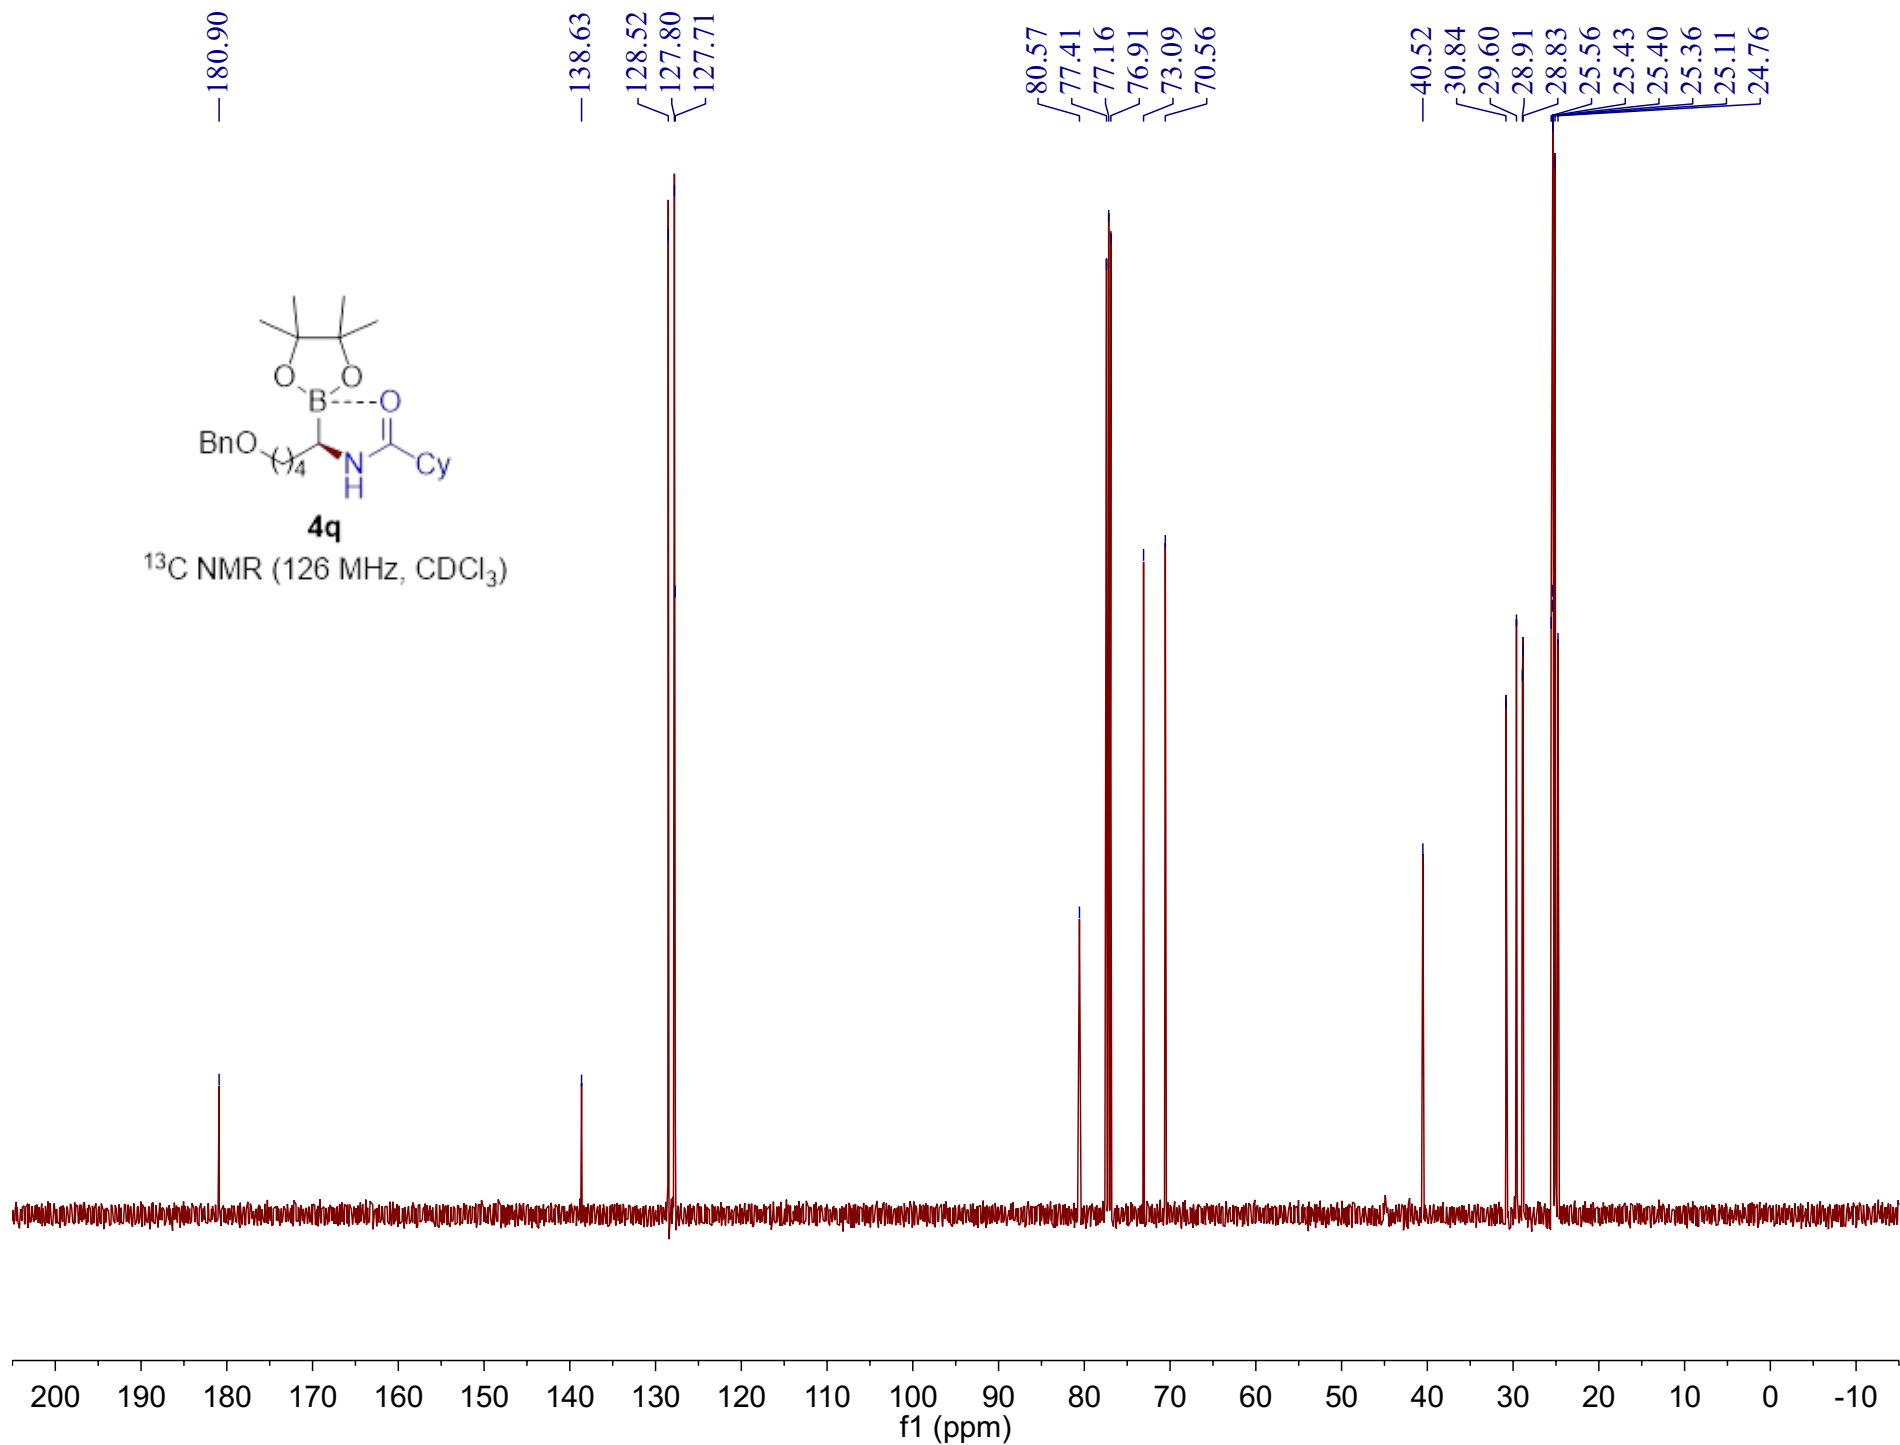

Supplementary Figure 105:  $^{13}\text{C}$  NMR (126 MHz,  $\text{CDCl}_3$ ) spectrum of **4q**.

—16.03

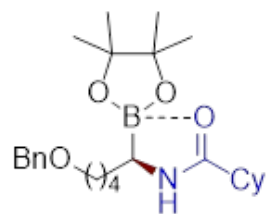

**4q**

$^{11}\text{B}$  NMR (160 MHz,  $\text{CDCl}_3$ )

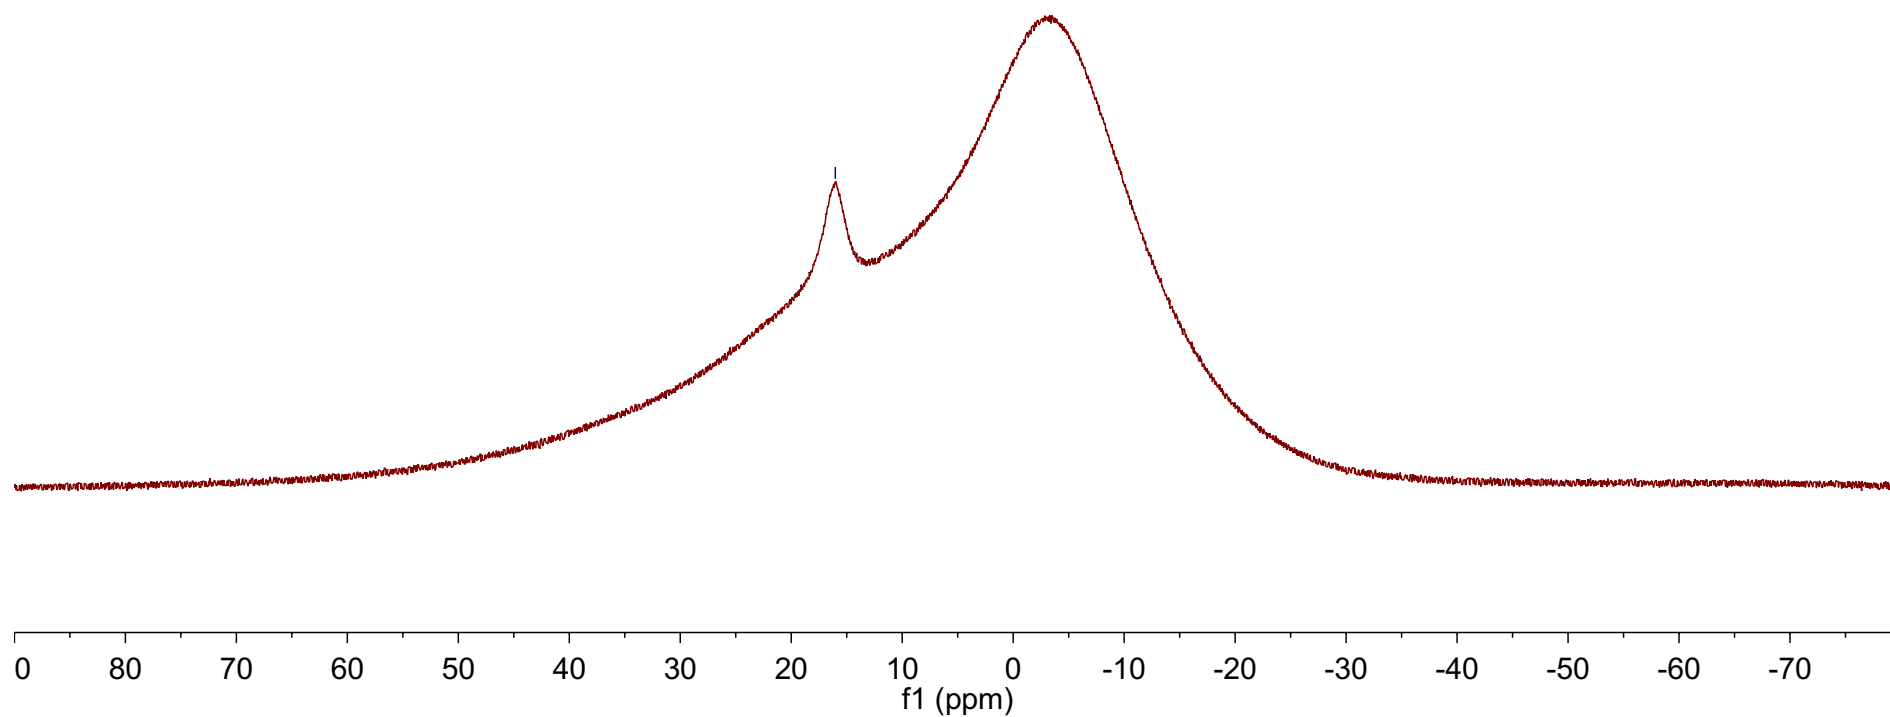

**Supplementary Figure 106:**  $^{11}\text{B}$  NMR (160 MHz,  $\text{CDCl}_3$ ) spectrum of **4q**.

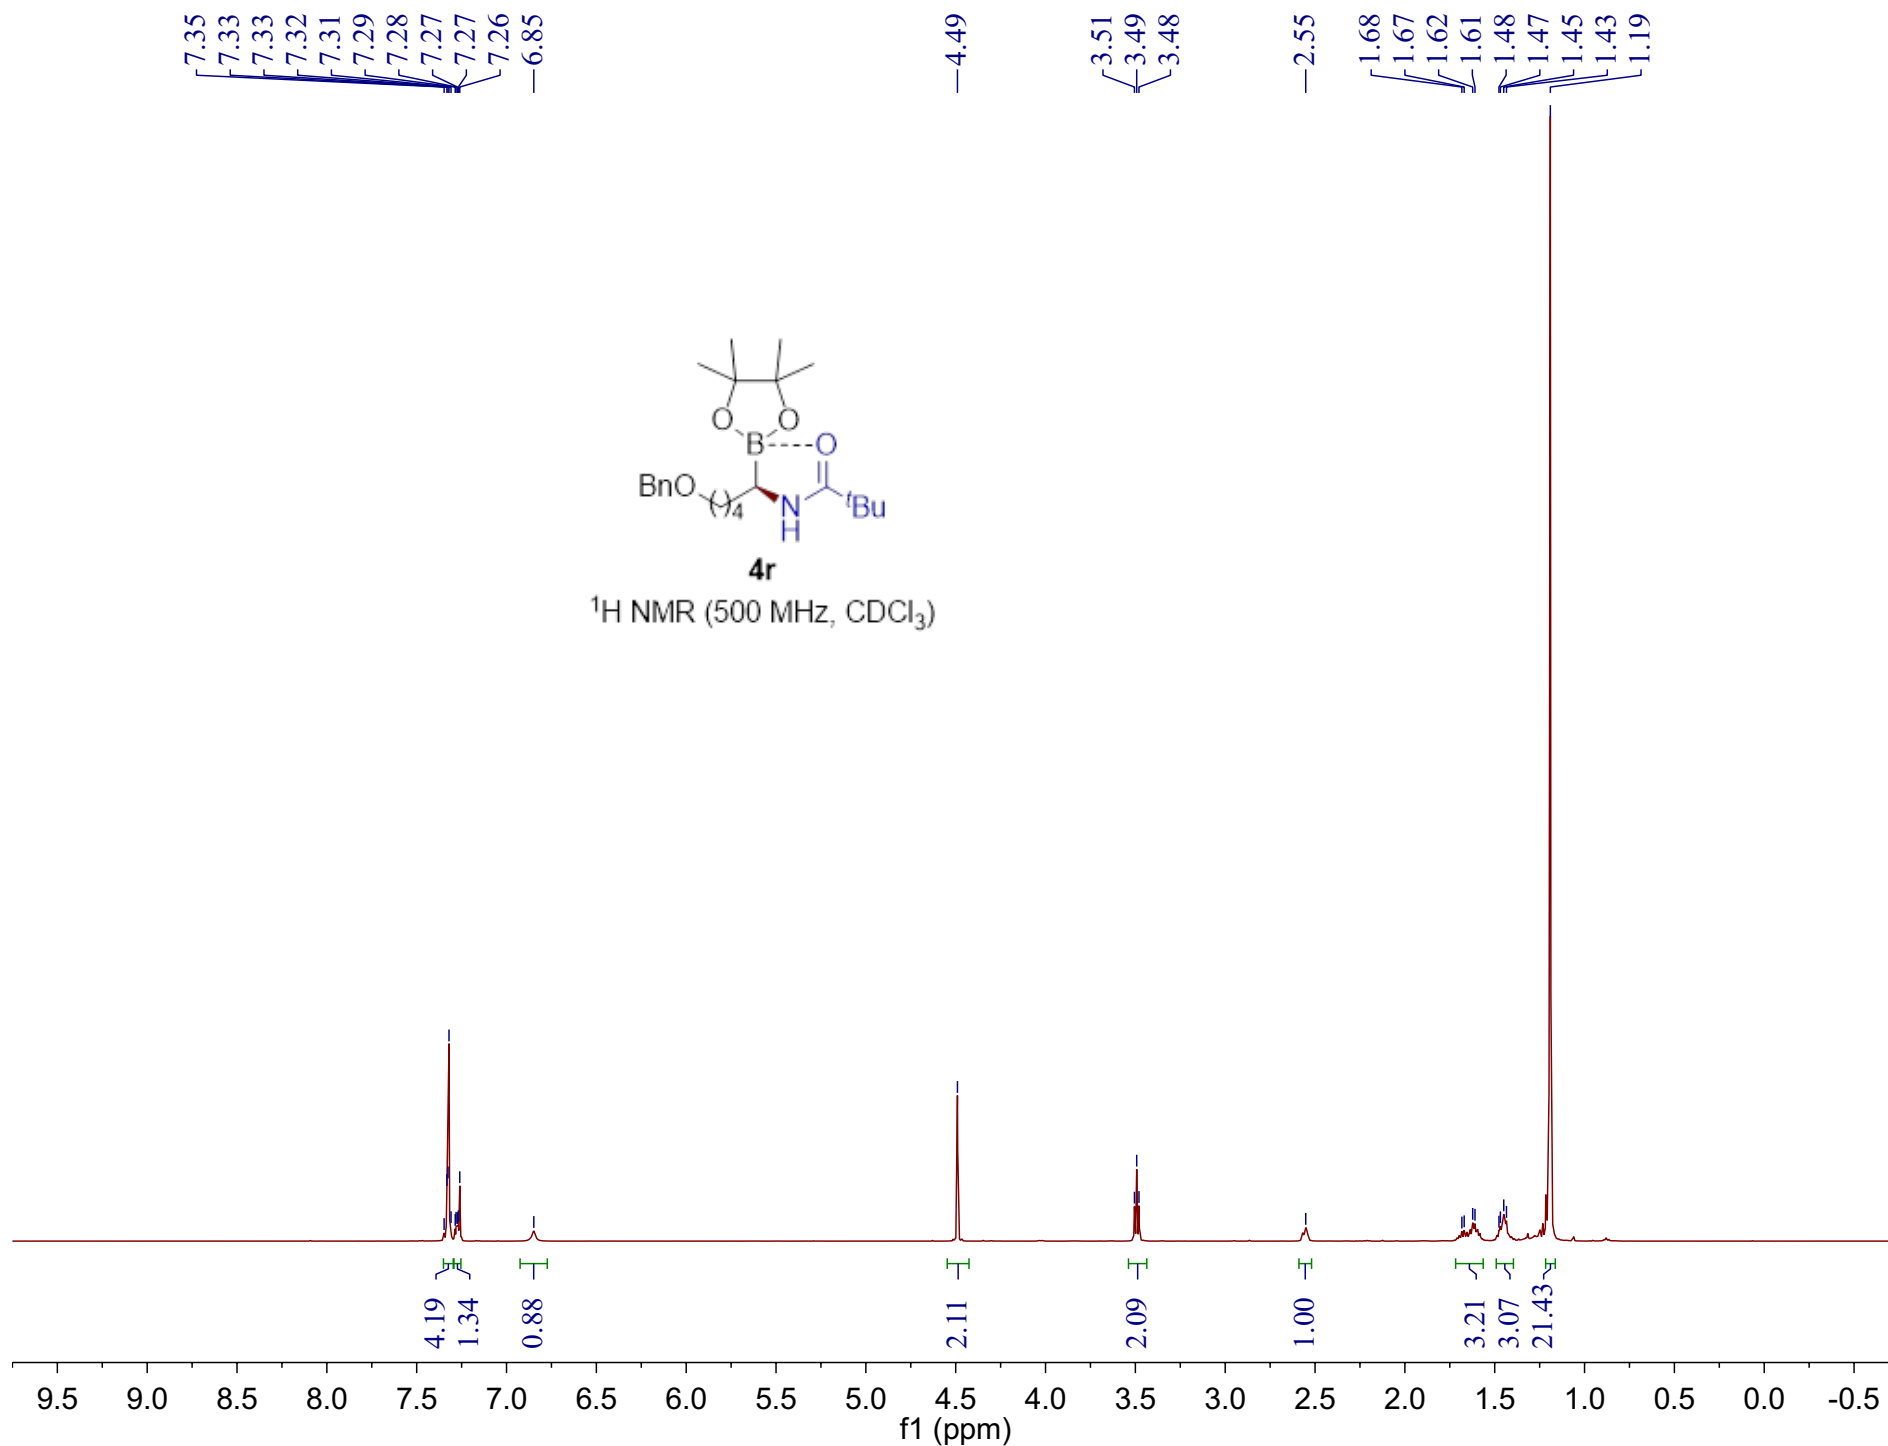

Supplementary Figure 107: <sup>1</sup>H NMR (500 MHz, CDCl<sub>3</sub>) spectrum of **4r**.

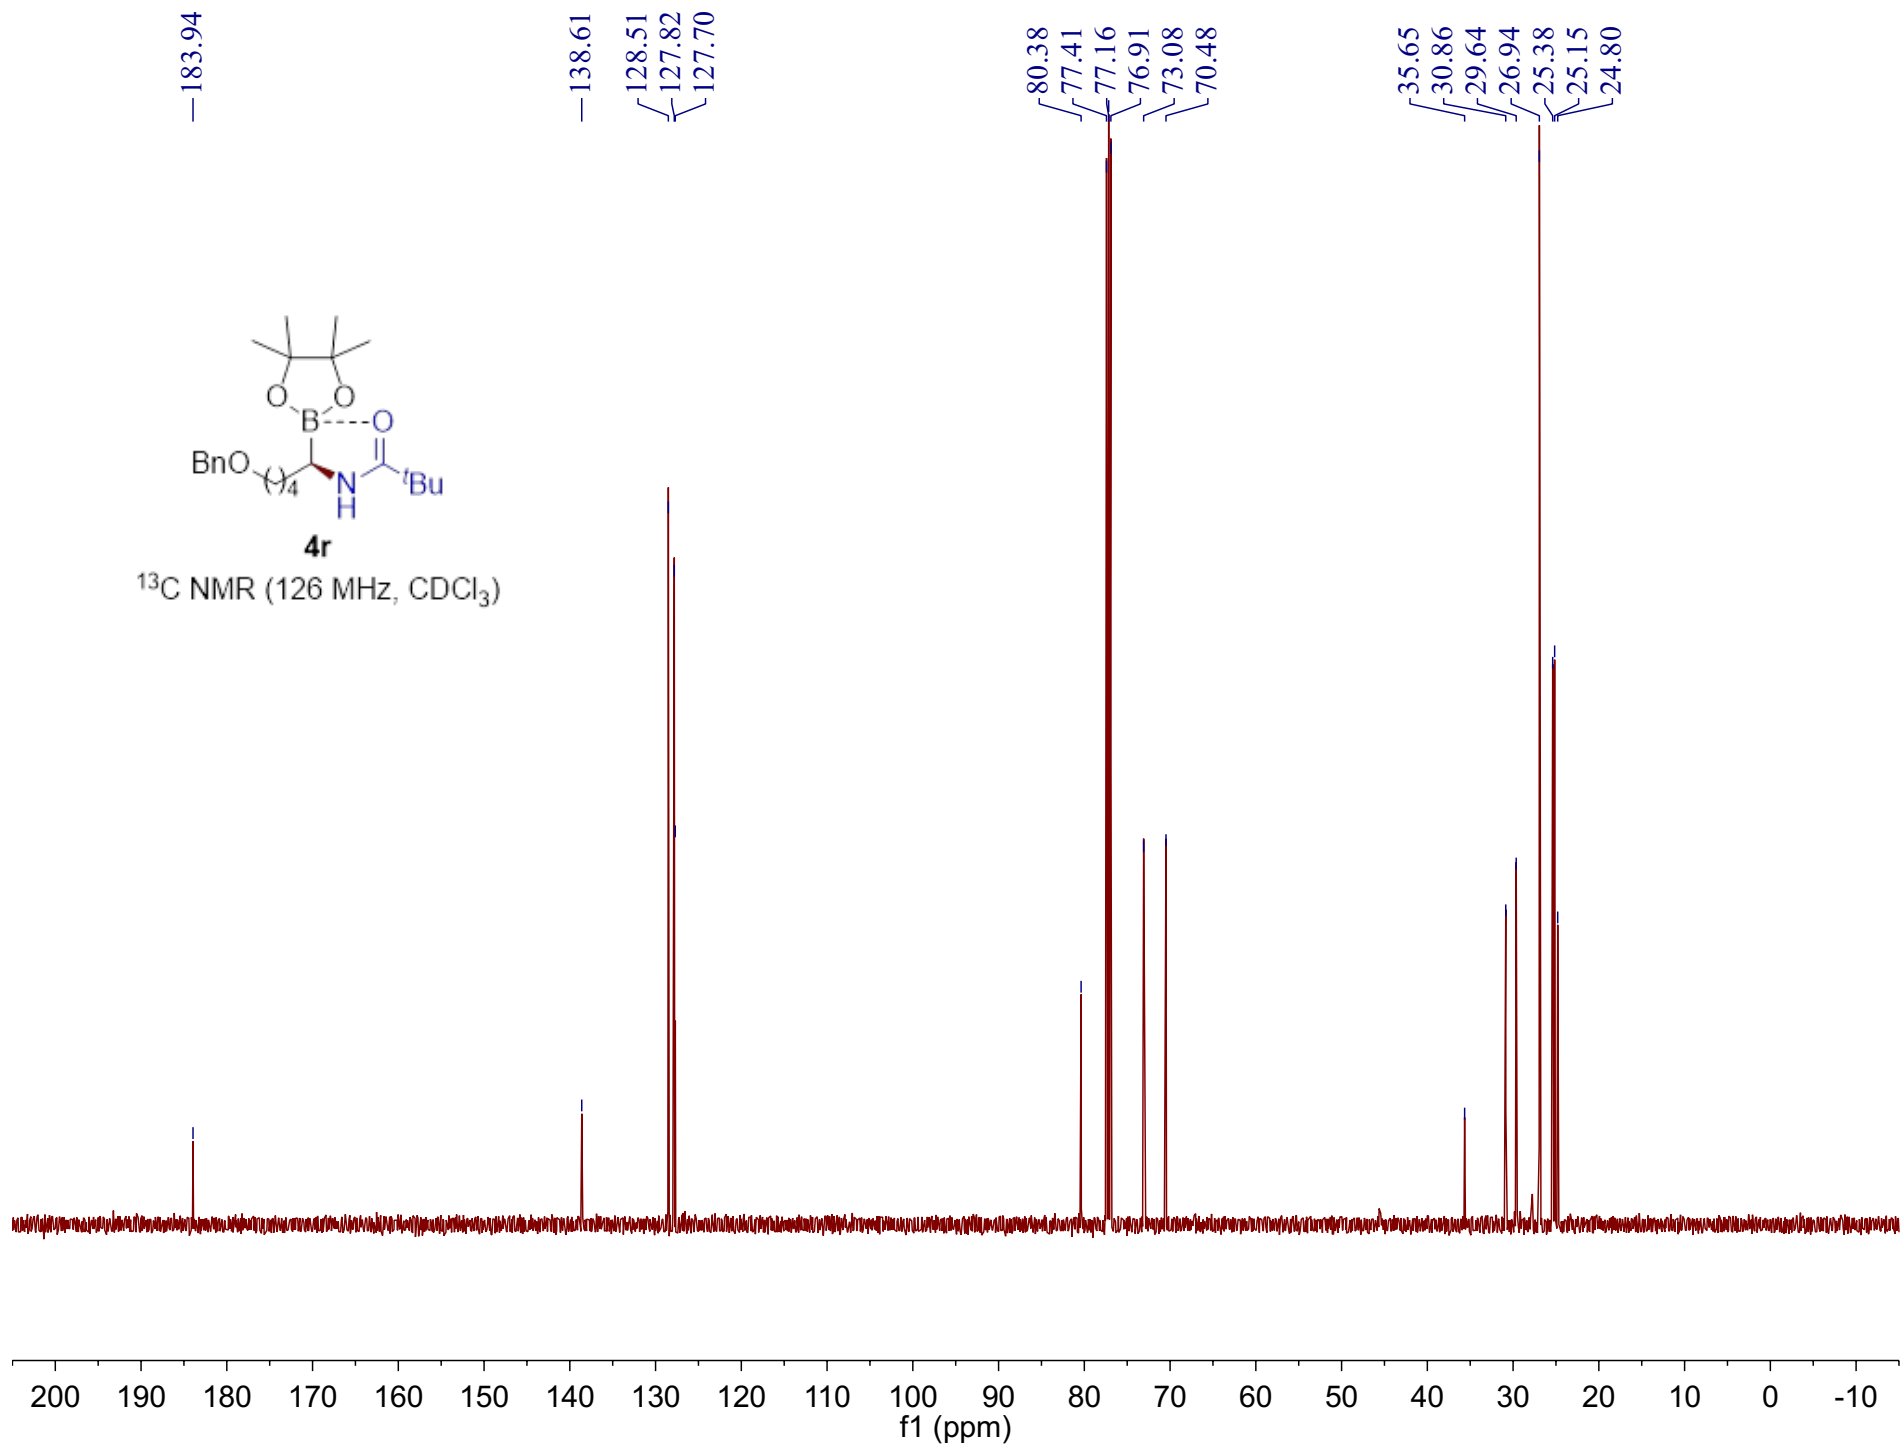

Supplementary Figure 108:  $^{13}\text{C}$  NMR (126 MHz,  $\text{CDCl}_3$ ) spectrum of **4r**.

—15.81

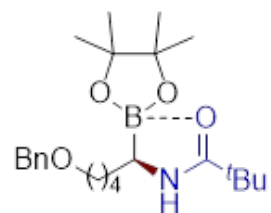

**4r**

$^{11}\text{B}$  NMR (160 MHz,  $\text{CDCl}_3$ )

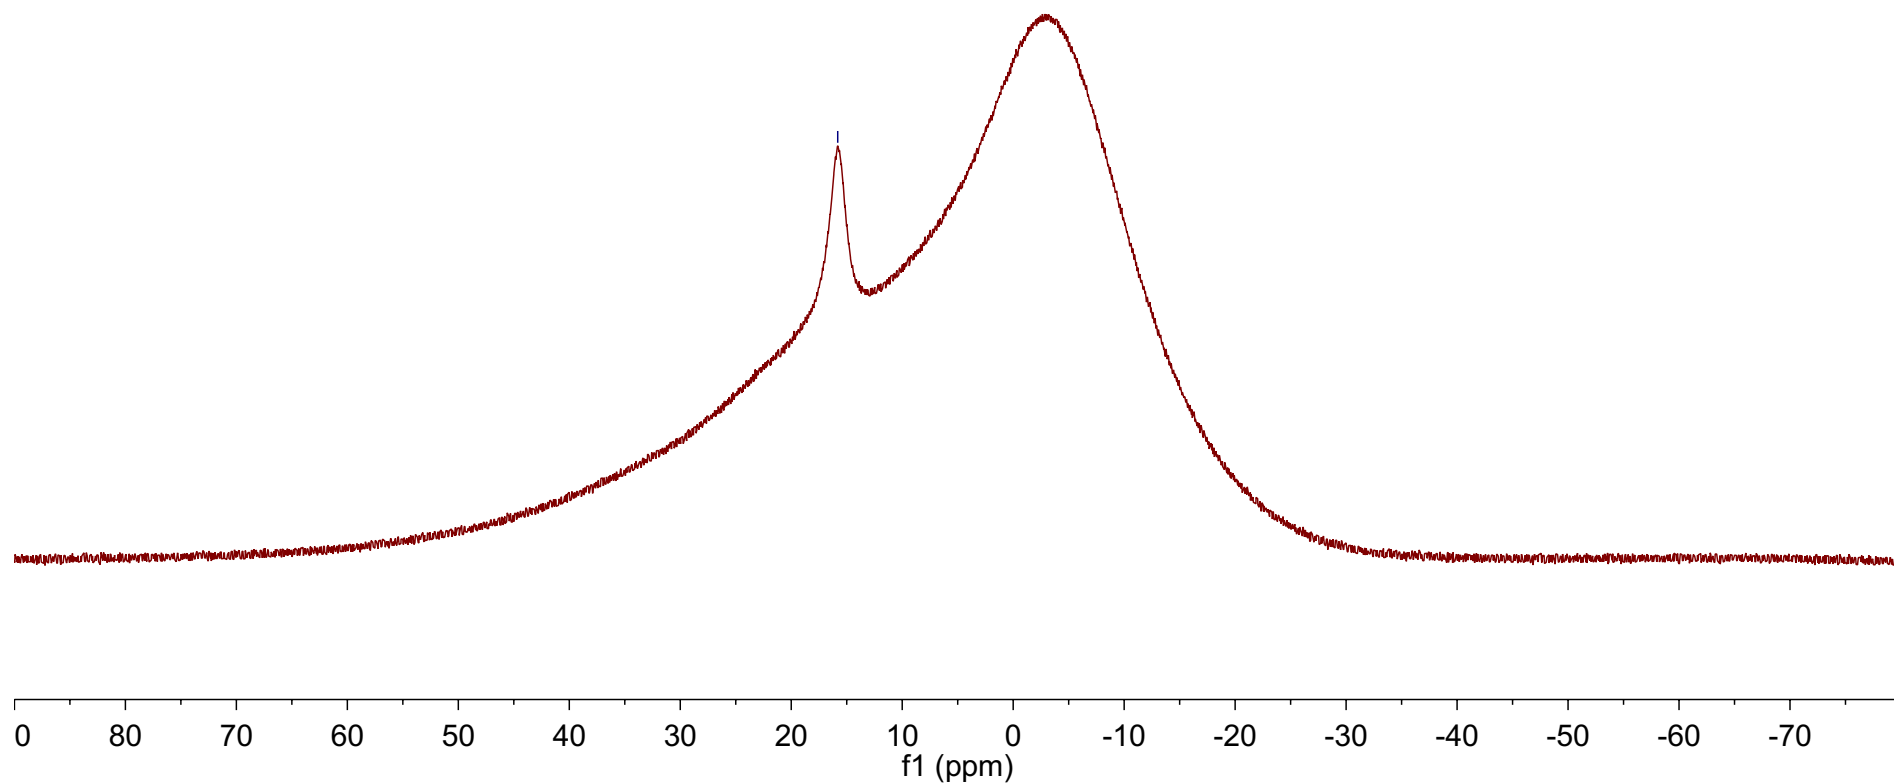

**Supplementary Figure 109:**  $^{11}\text{B}$  NMR (160 MHz,  $\text{CDCl}_3$ ) spectrum of **4r**.

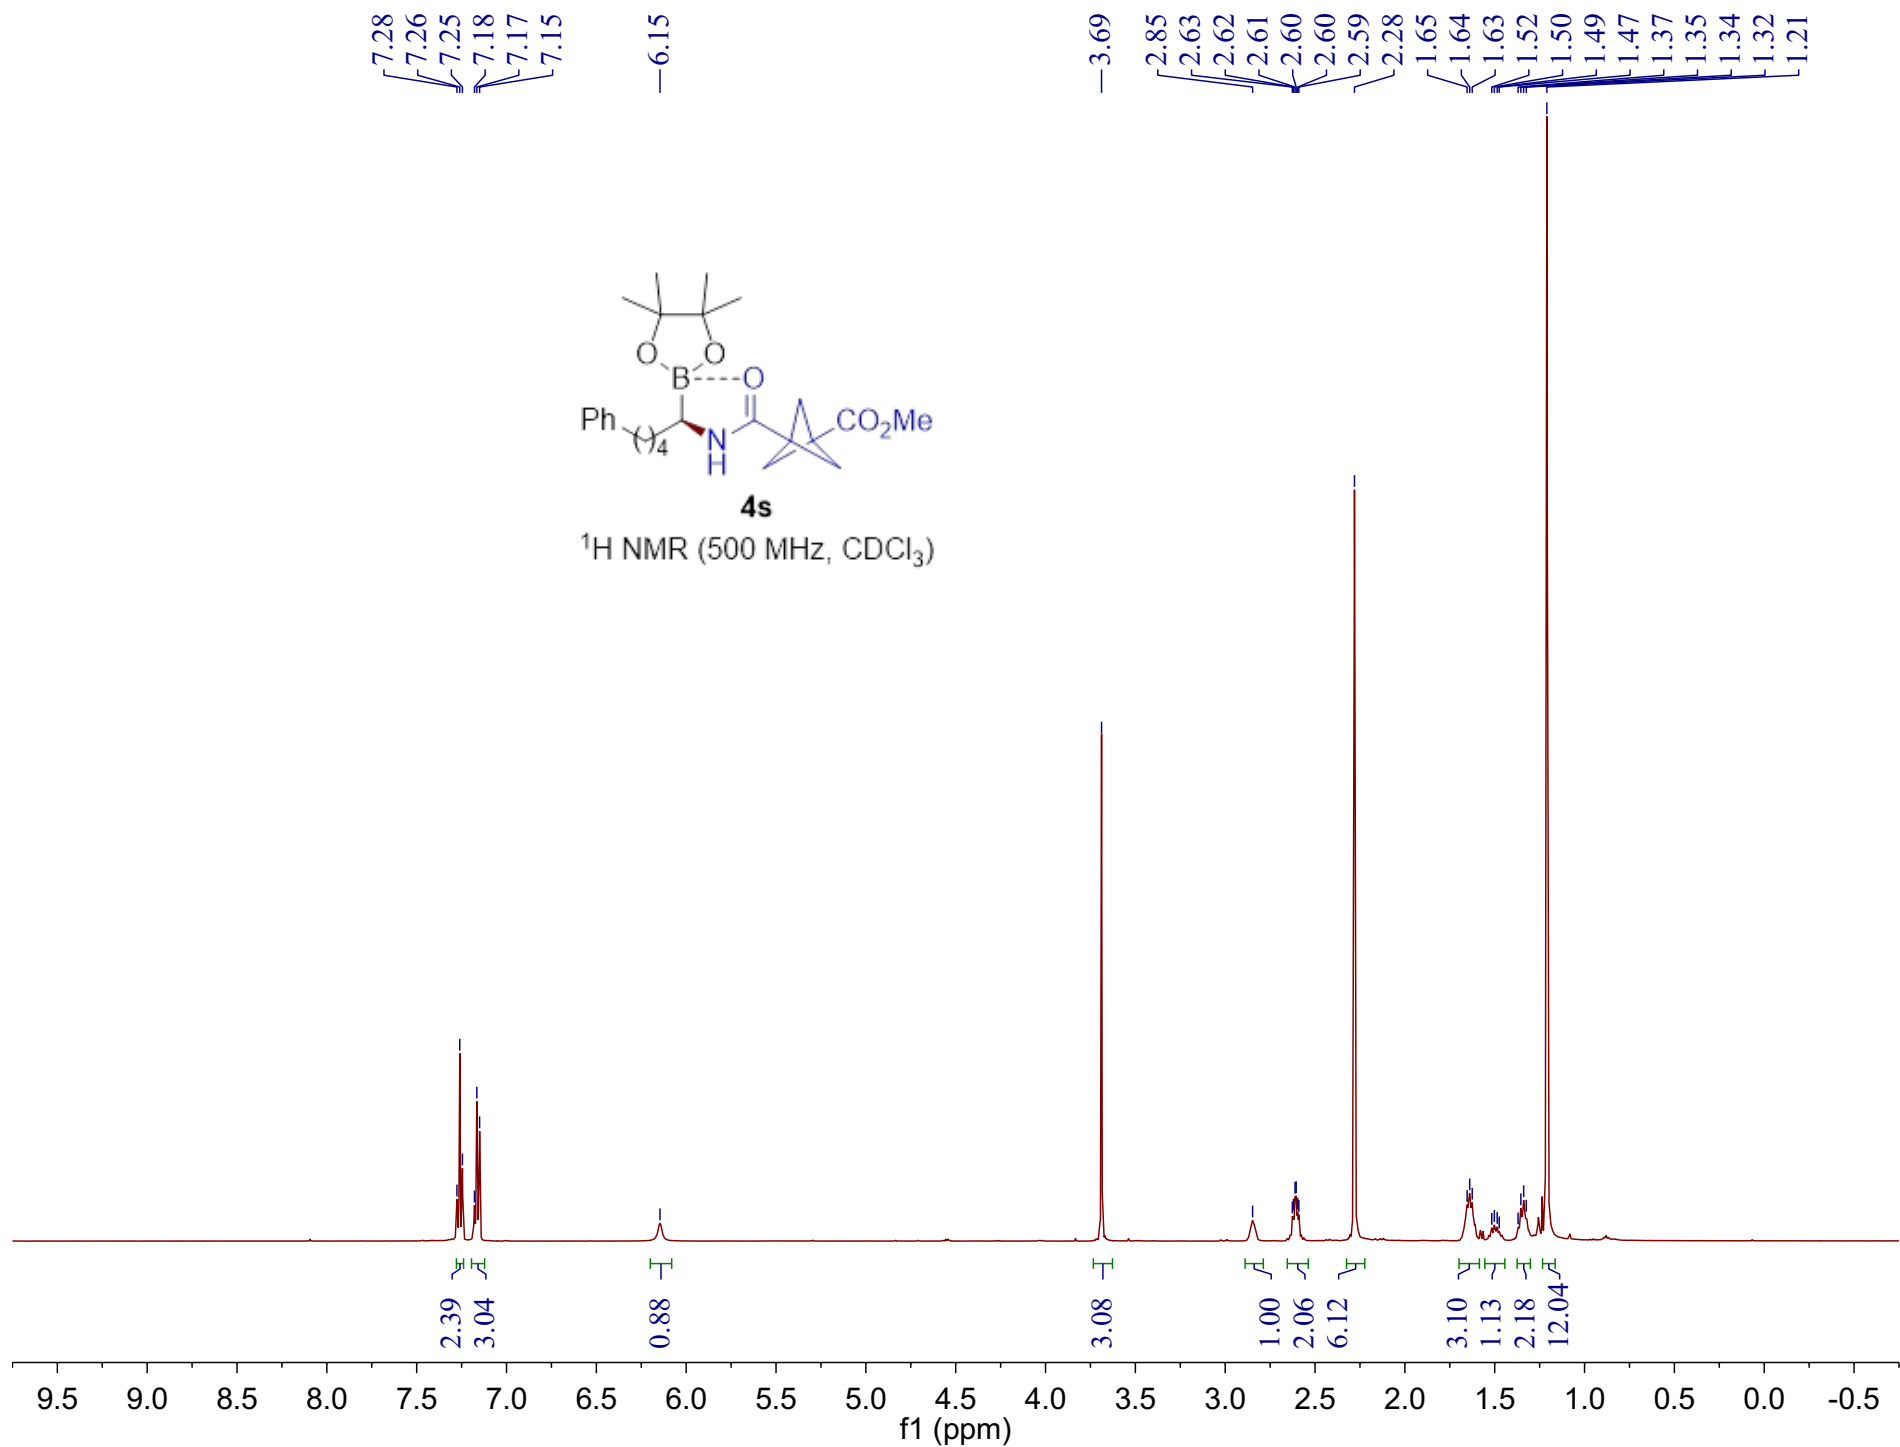

Supplementary Figure 110: <sup>1</sup>H NMR (500 MHz, CDCl<sub>3</sub>) spectrum of **4s**.

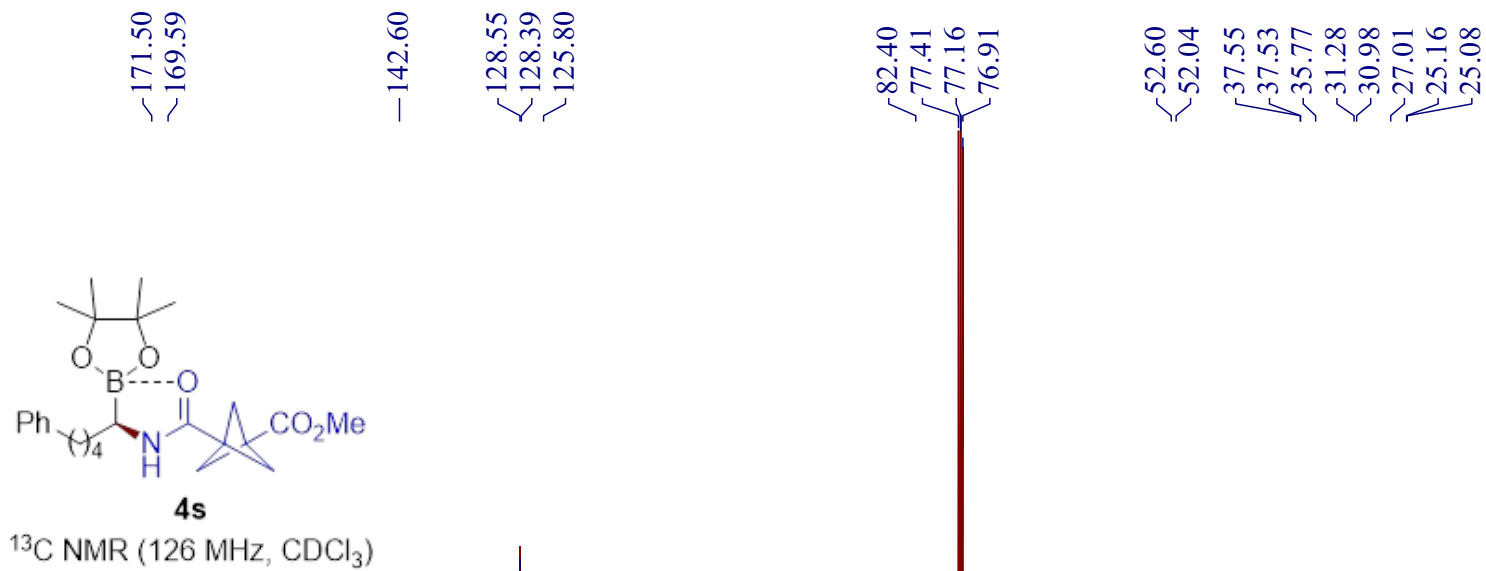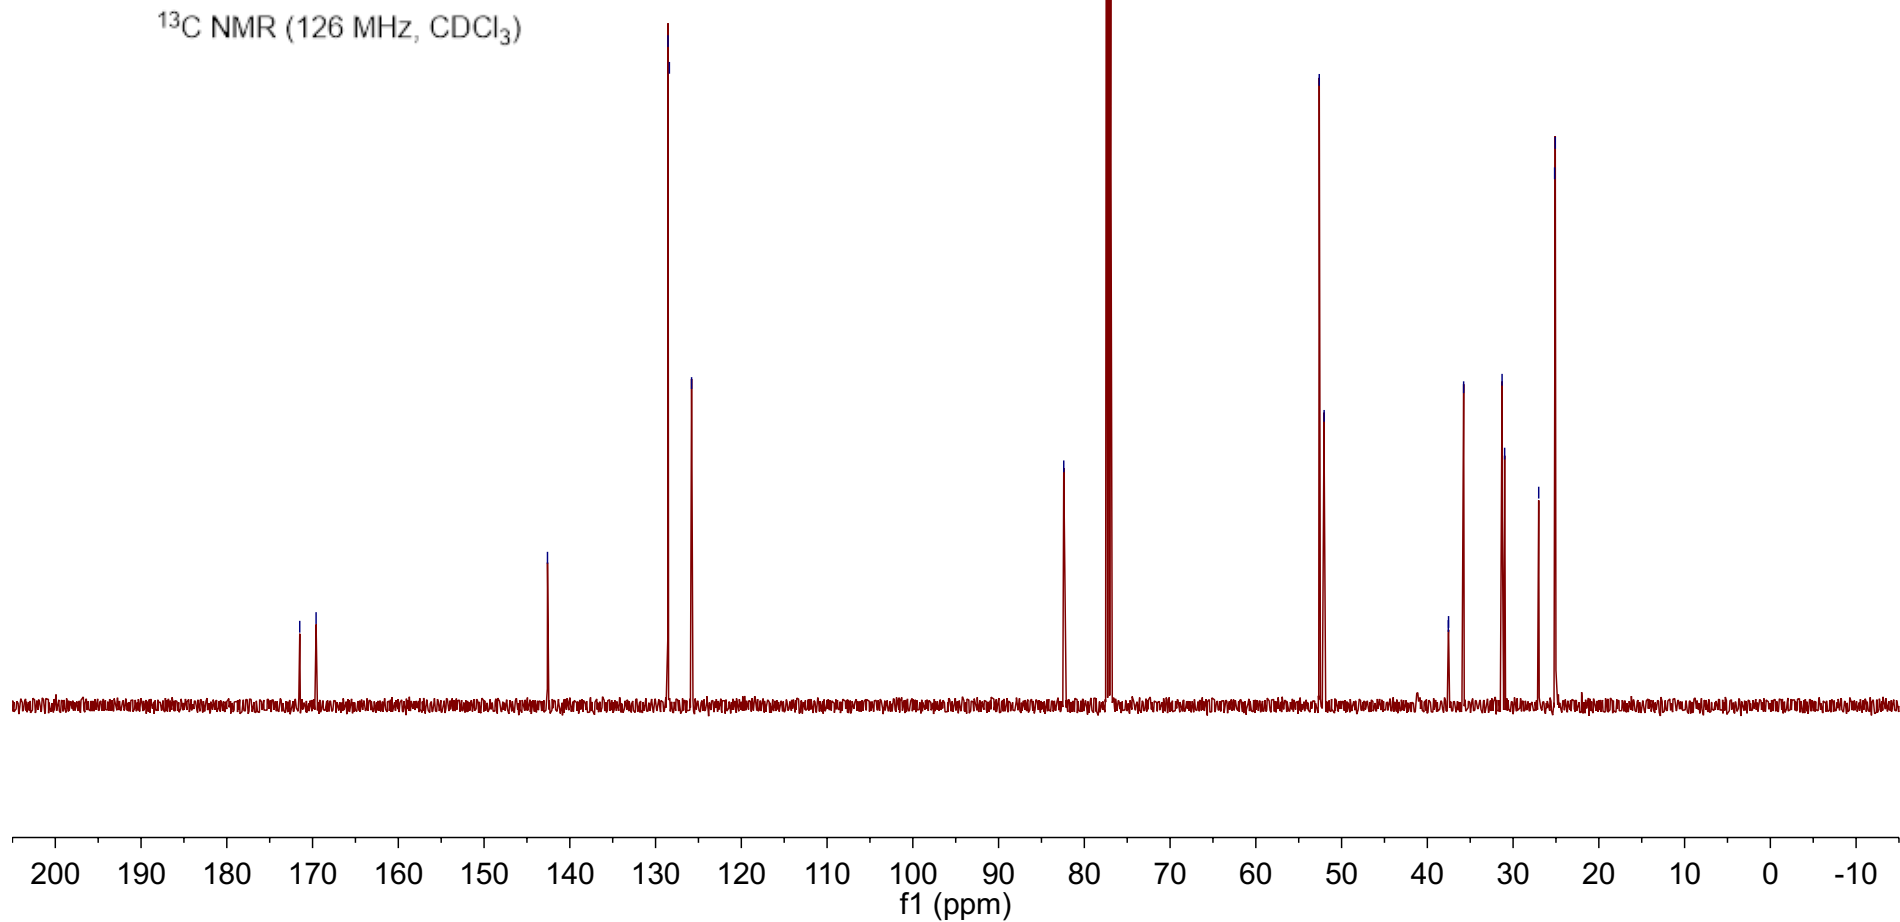

Supplementary Figure 111:  $^{13}\text{C}$  NMR (126 MHz,  $\text{CDCl}_3$ ) spectrum of **4s**.

—24.51

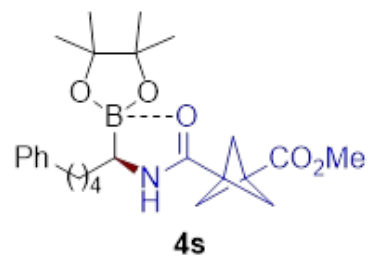

<sup>11</sup>B NMR (160 MHz, CDCl<sub>3</sub>)

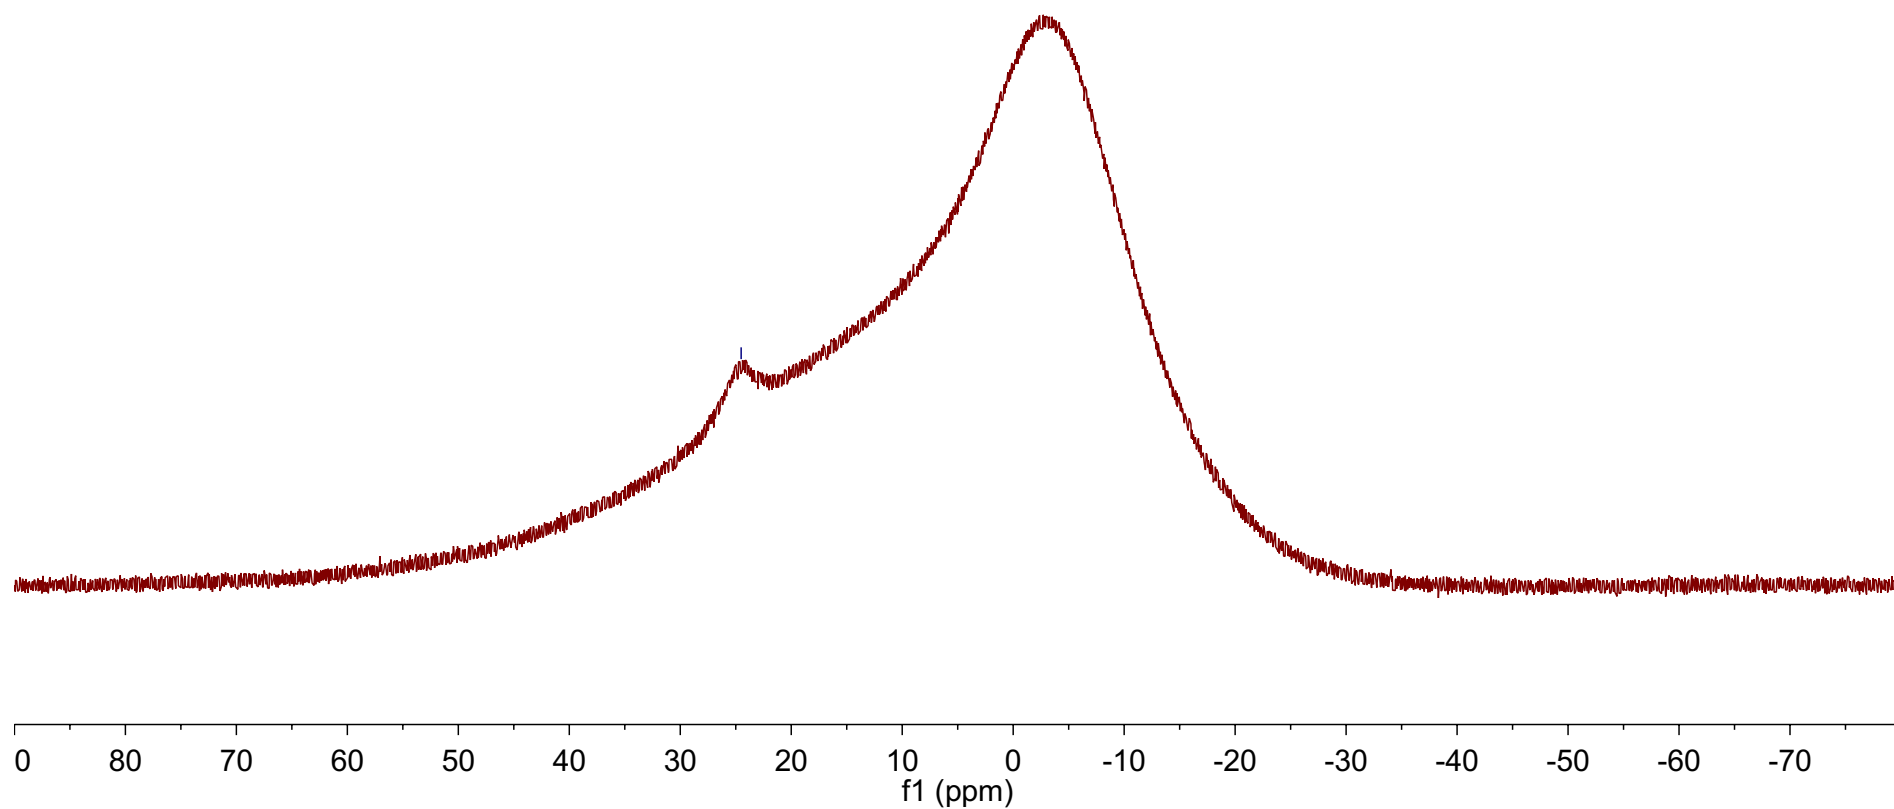

Supplementary Figure 112: <sup>11</sup>B NMR (160 MHz, CDCl<sub>3</sub>) spectrum of **4s**.



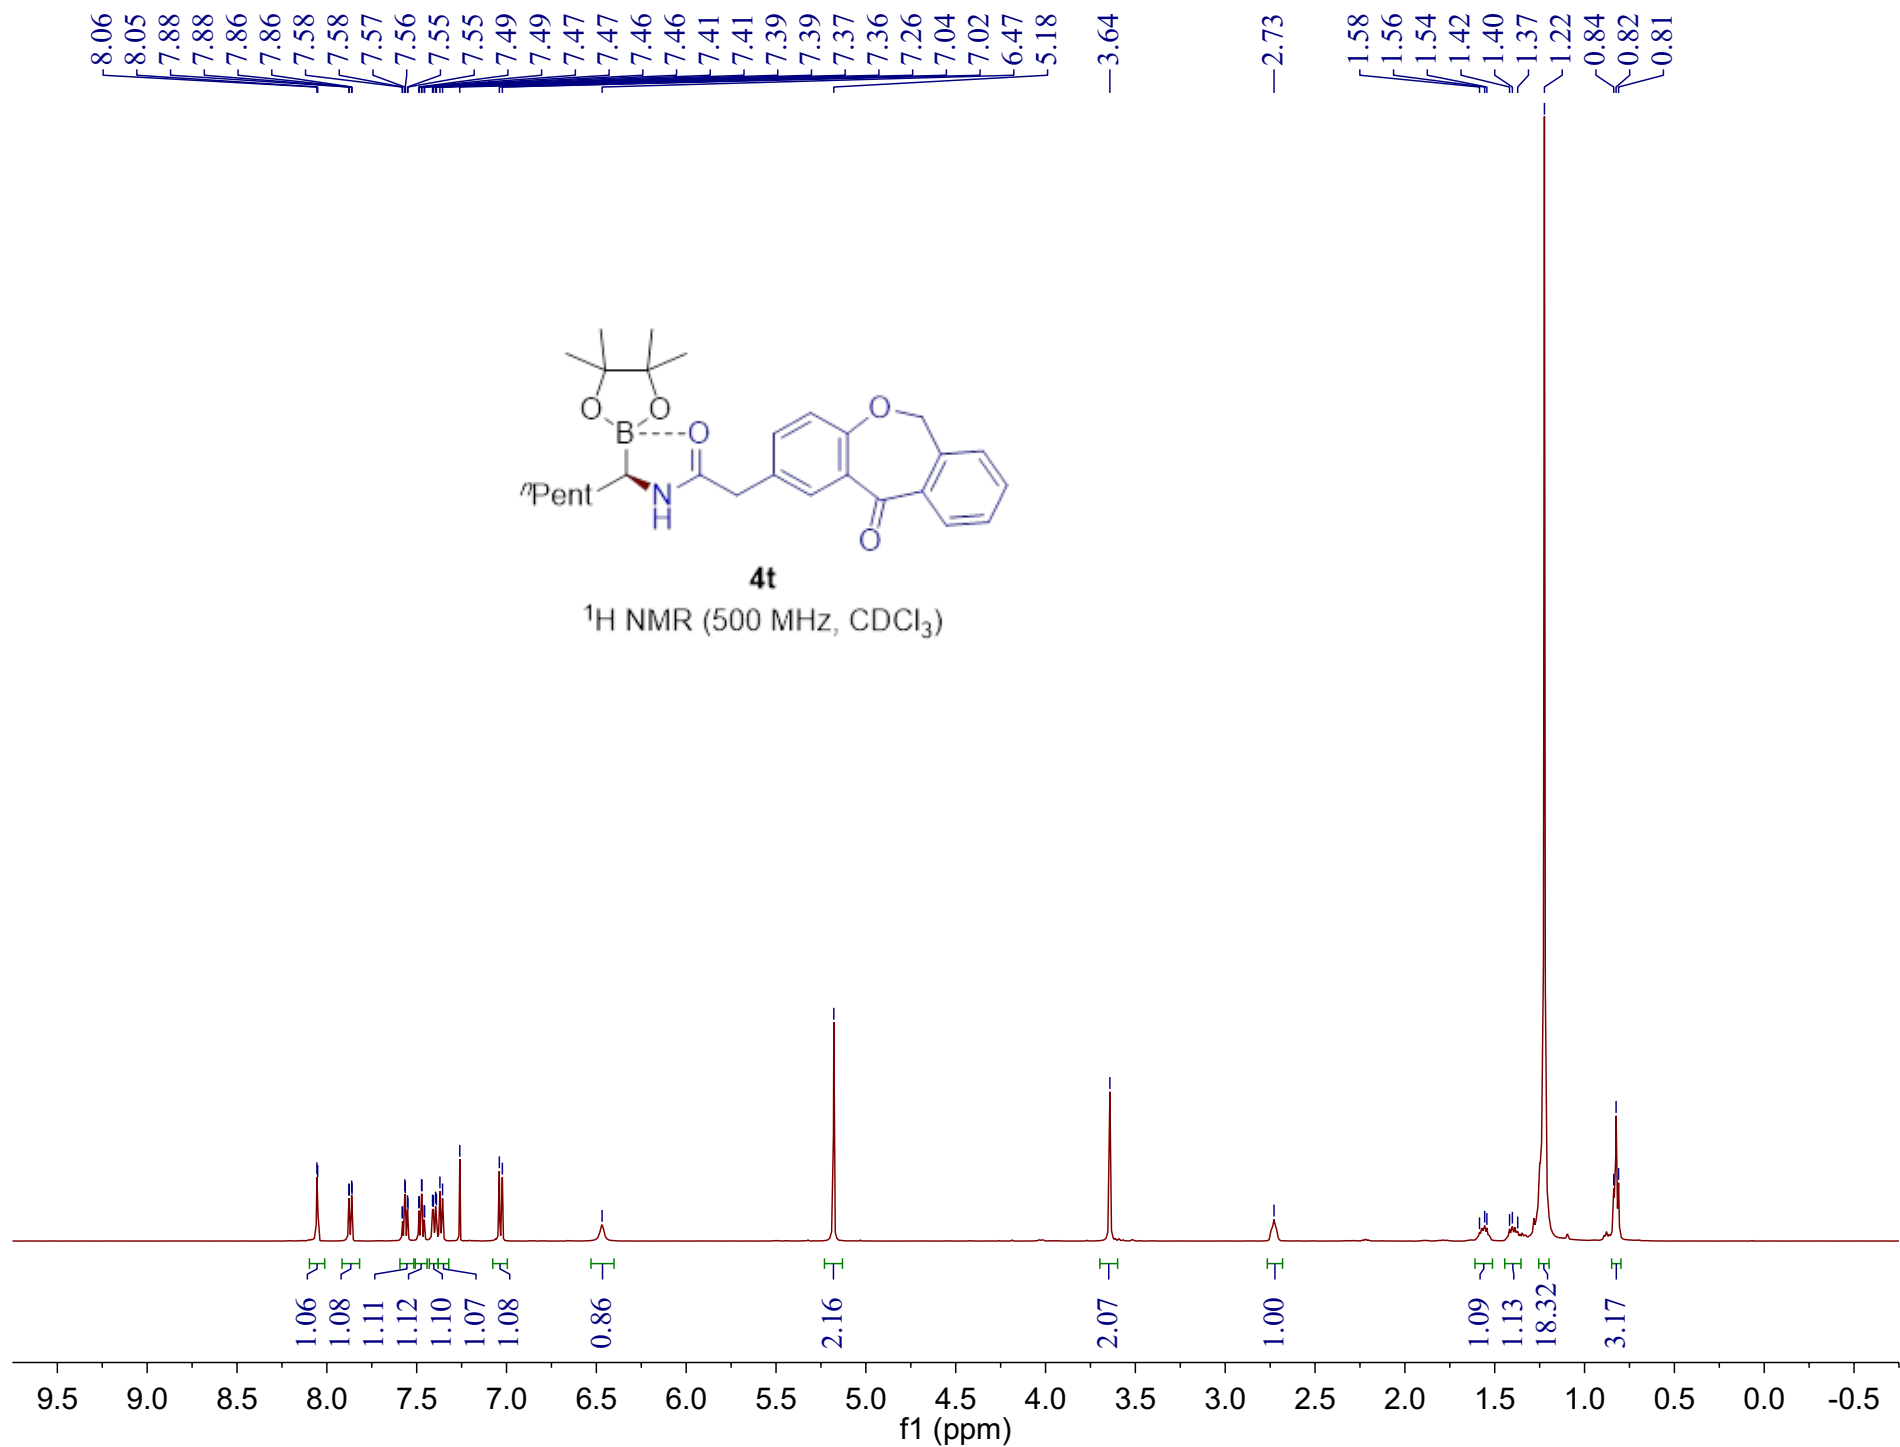

Supplementary Figure 113: <sup>1</sup>H NMR (500 MHz, CDCl<sub>3</sub>) spectrum of **4t**.

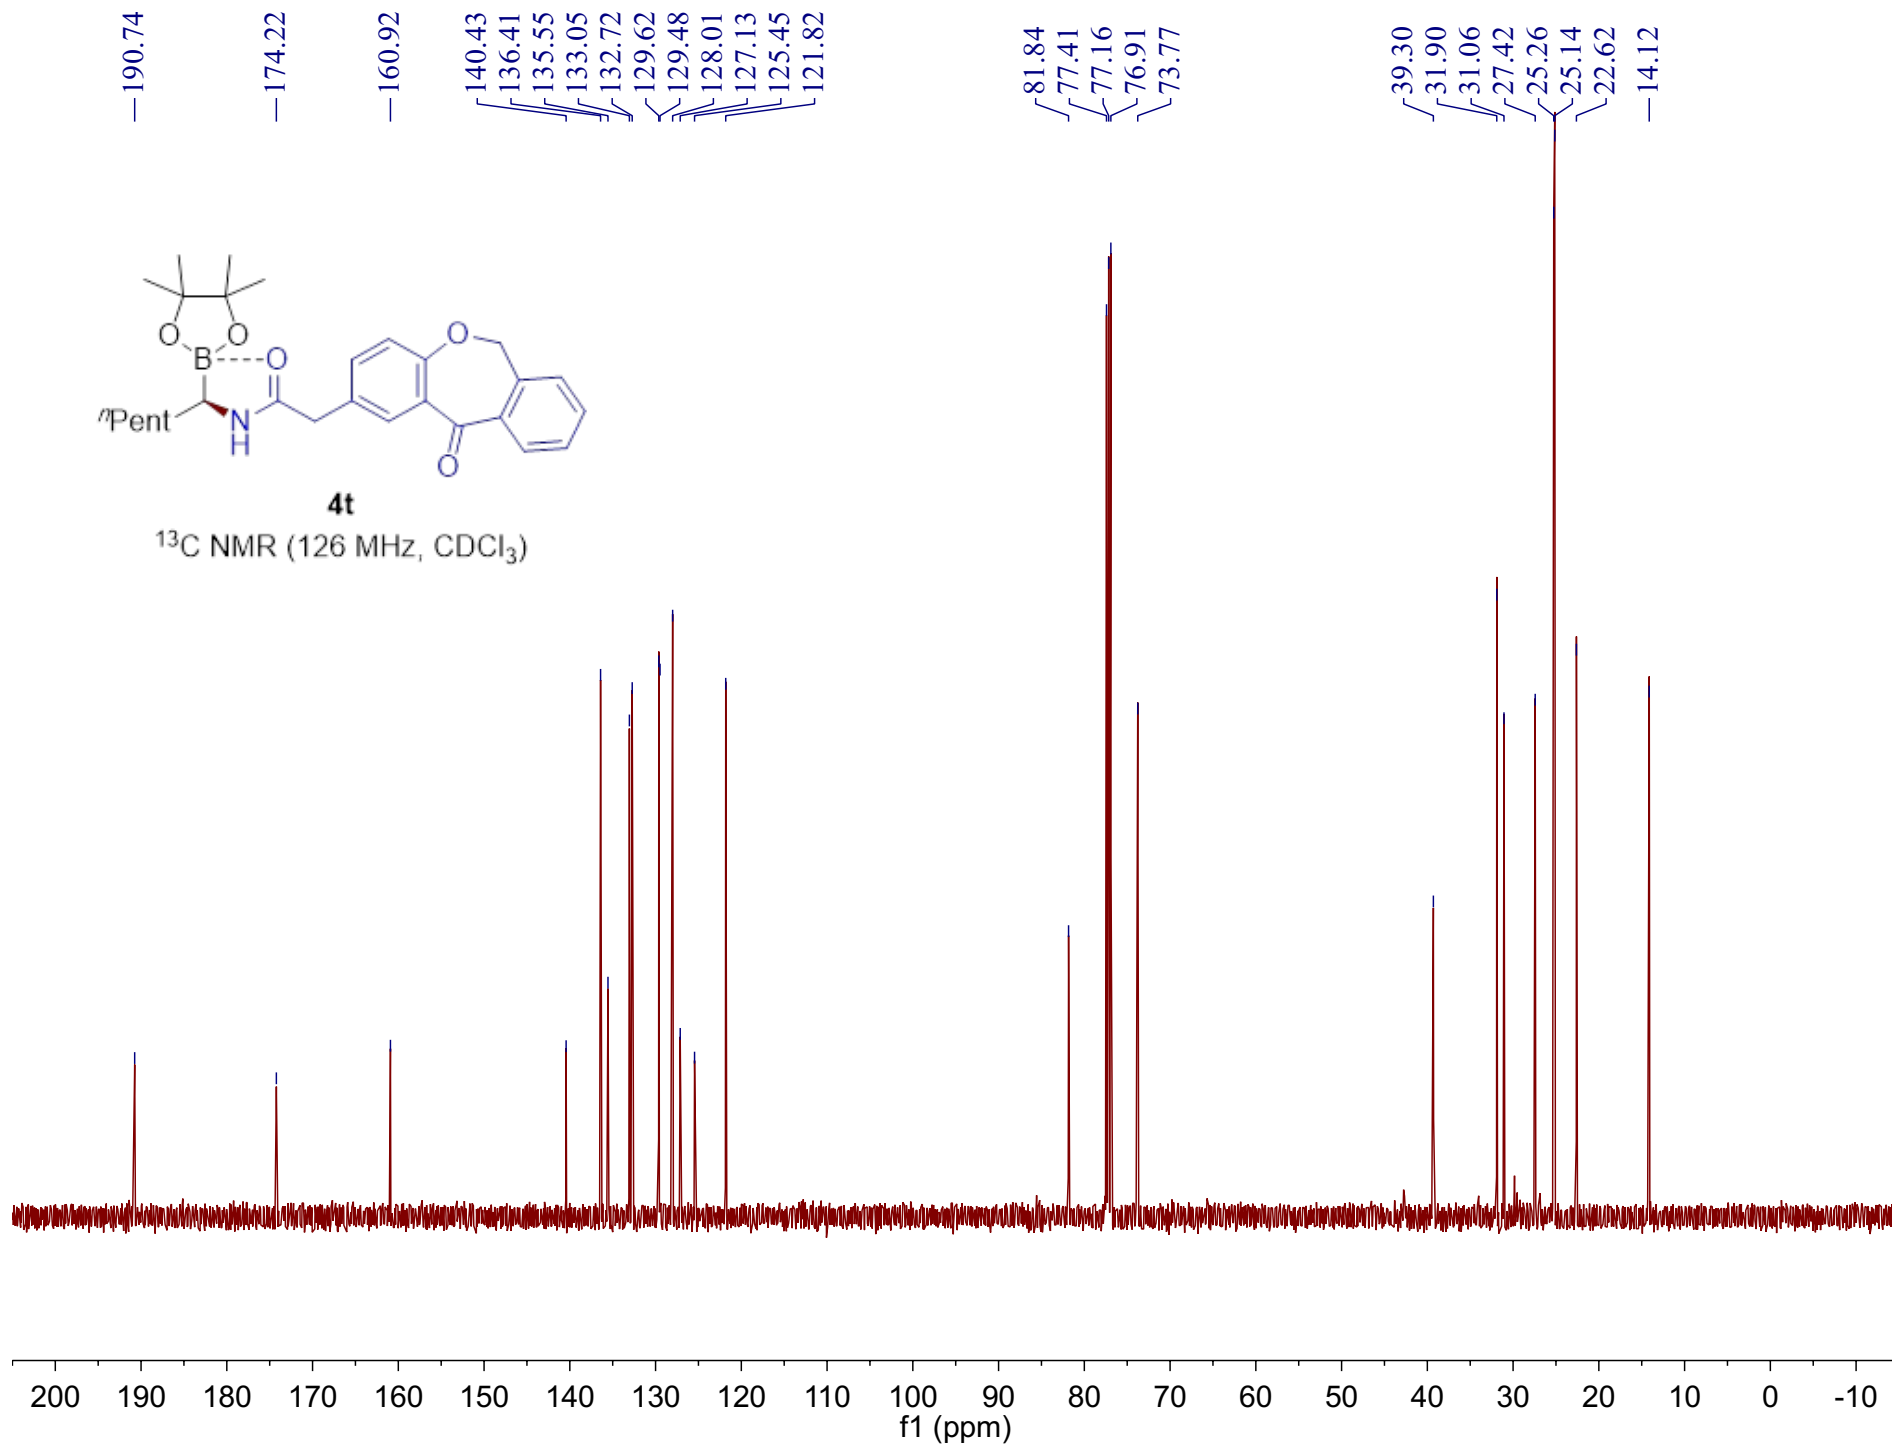

Supplementary Figure 114: <sup>13</sup>C NMR (126 MHz, CDCl<sub>3</sub>) spectrum of **4t**.

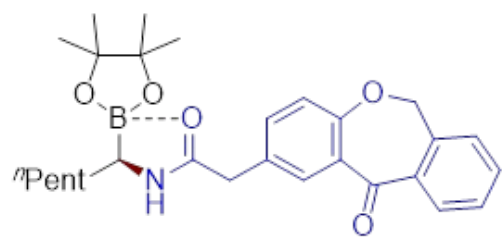

**4t**

<sup>11</sup>B NMR (160 MHz, CDCl<sub>3</sub>)

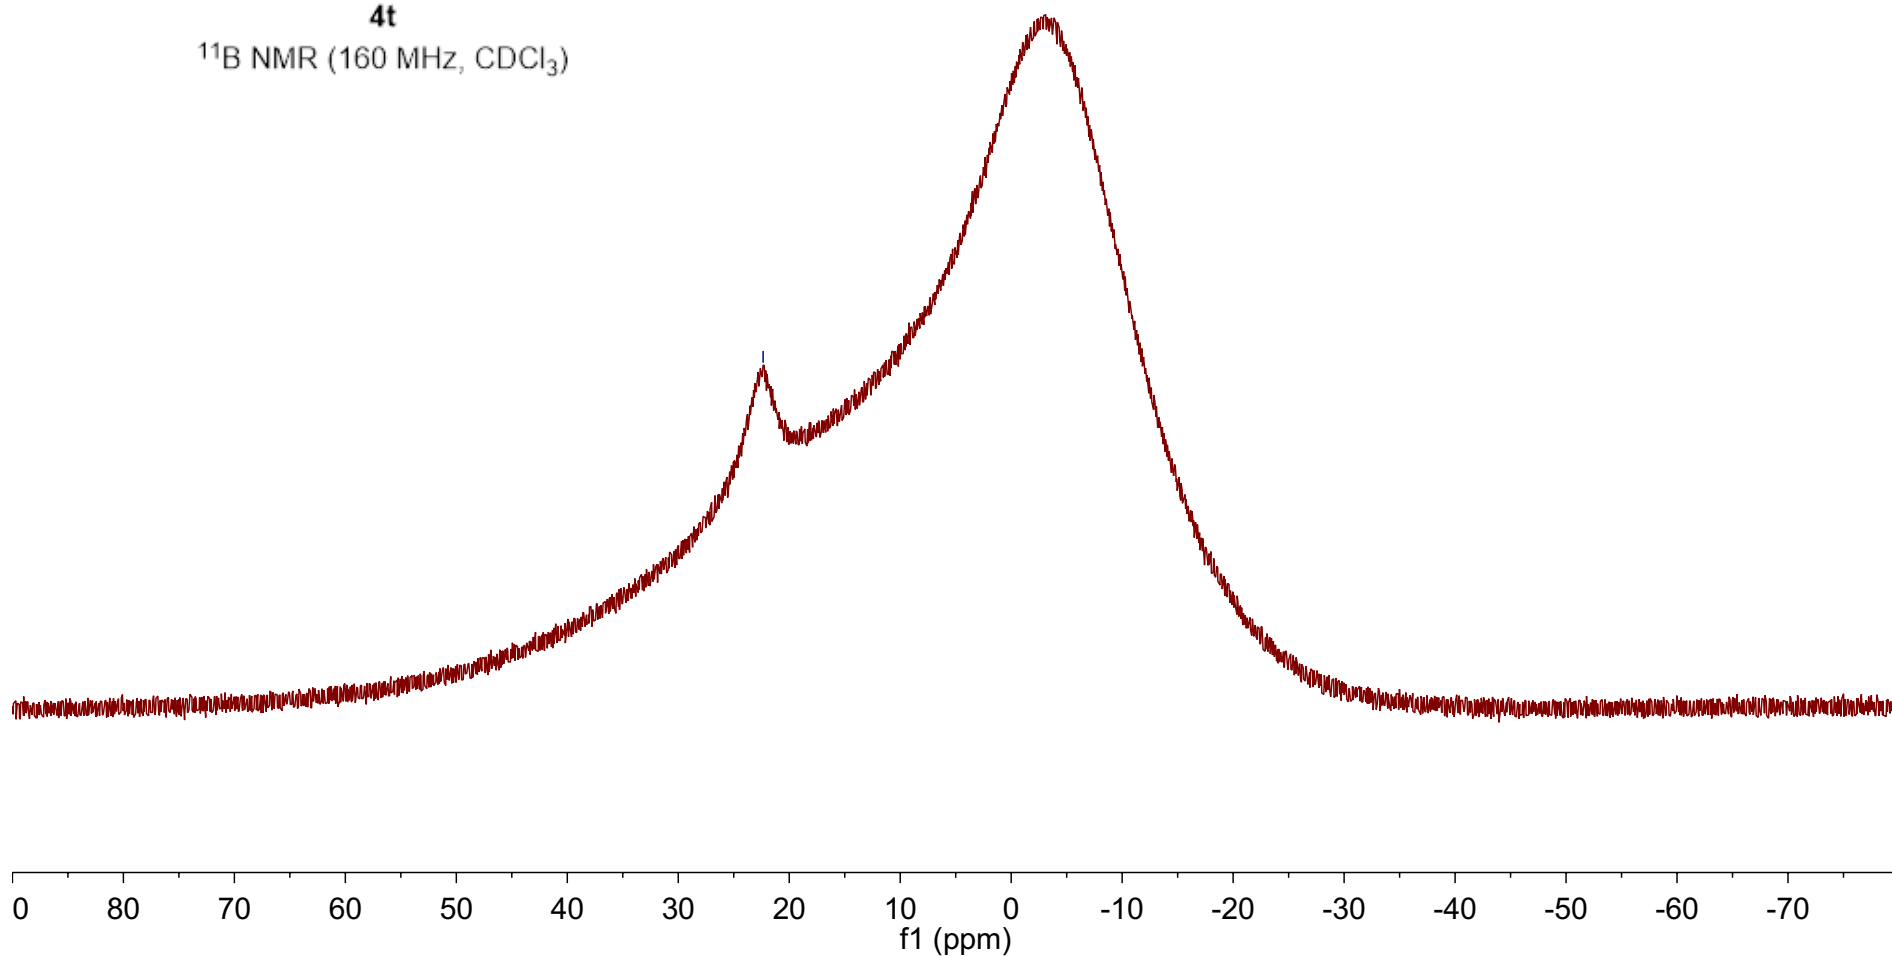

Supplementary Figure 115: <sup>11</sup>B NMR (160 MHz, CDCl<sub>3</sub>) spectrum of **4t**.

7.91  
7.63  
7.61  
7.59  
7.59  
7.57  
7.40  
7.39  
7.37  
7.36  
7.34  
7.28

3.24  
2.93  
2.77  
1.60  
1.58  
1.56  
1.47  
1.46  
1.44  
1.43  
1.31  
1.29  
1.28  
1.23  
0.84  
0.83  
0.82

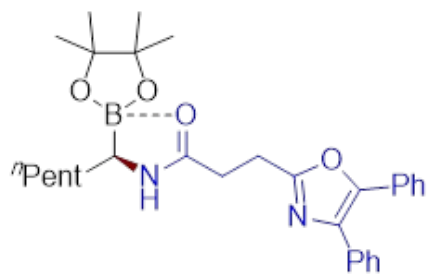

<sup>1</sup>H NMR (500 MHz, CDCl<sub>3</sub>)

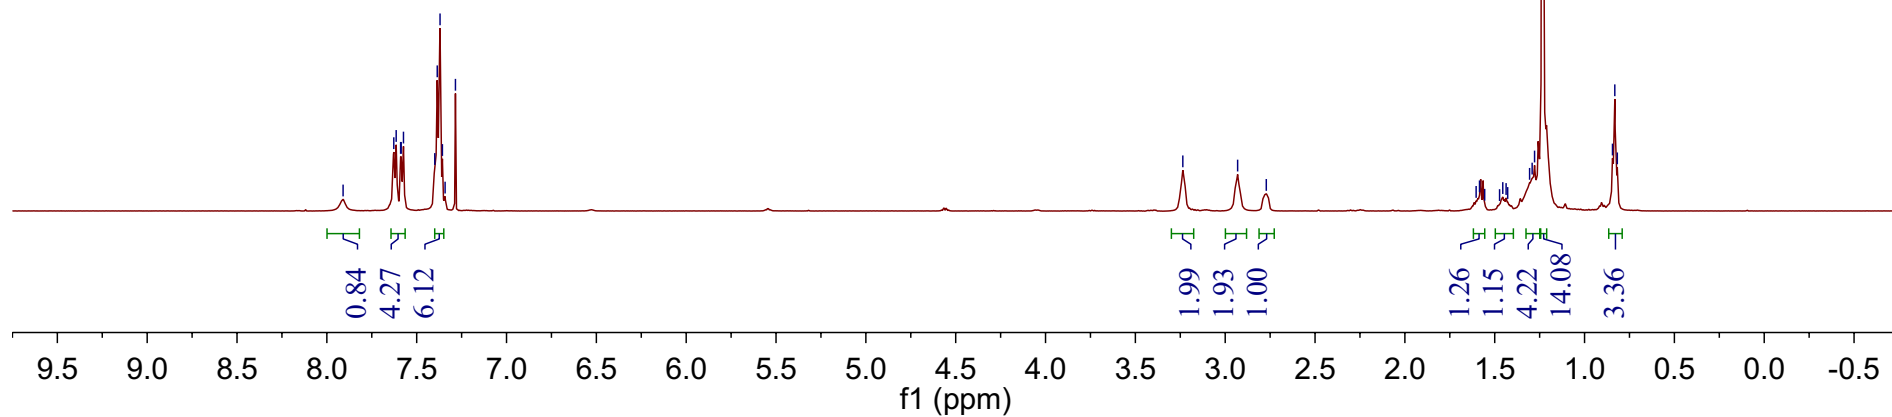

Supplementary Figure 116: <sup>1</sup>H NMR (500 MHz, CDCl<sub>3</sub>) spectrum of **4u**.

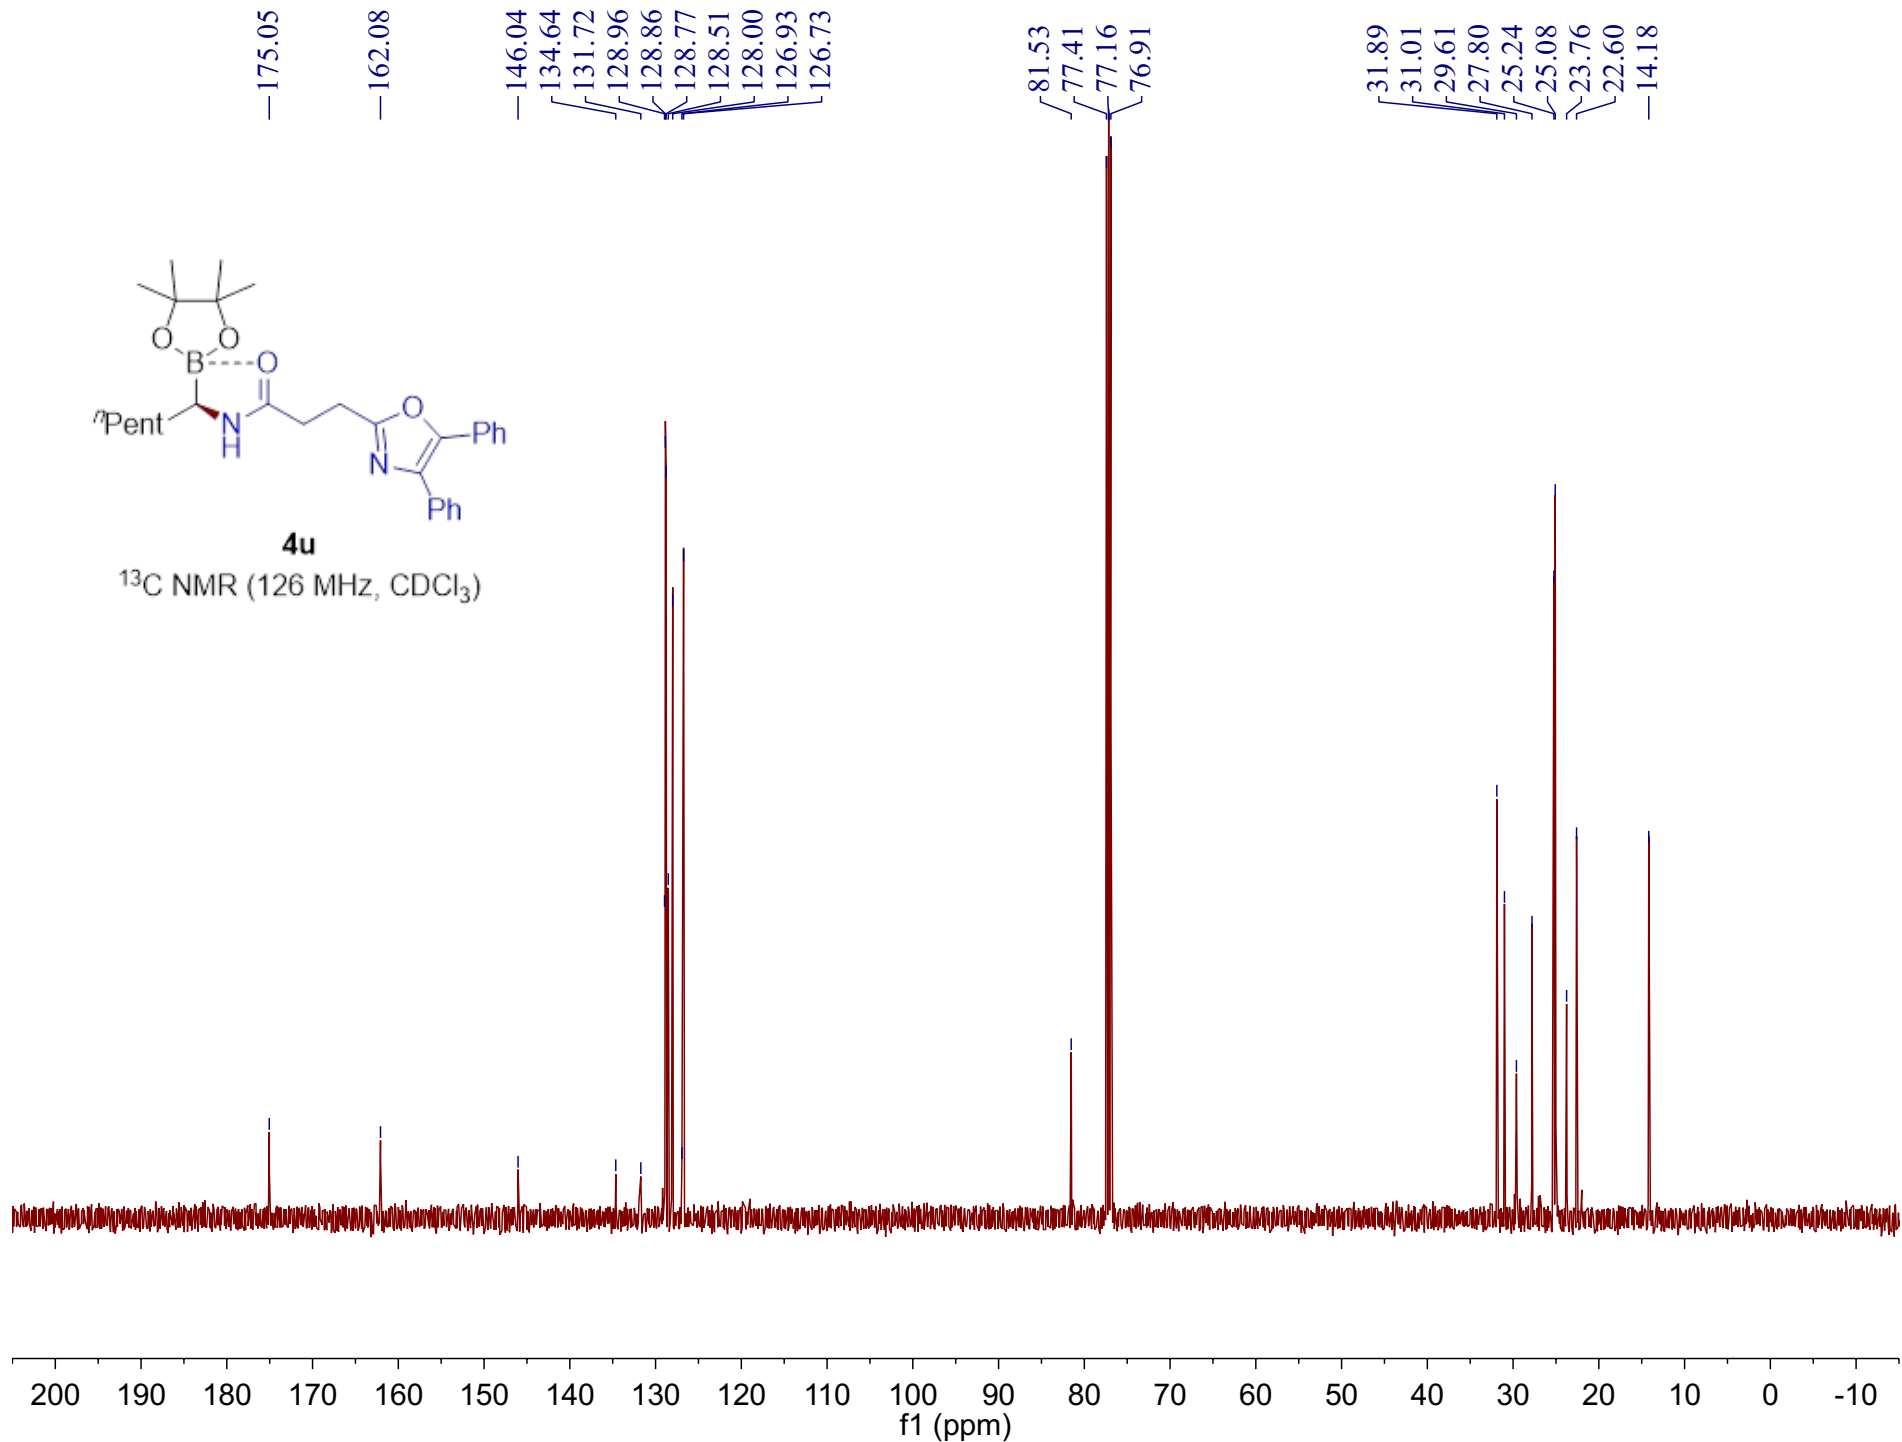

Supplementary Figure 117: <sup>13</sup>C NMR (126 MHz, CDCl<sub>3</sub>) spectrum of **4u**.

-20.81

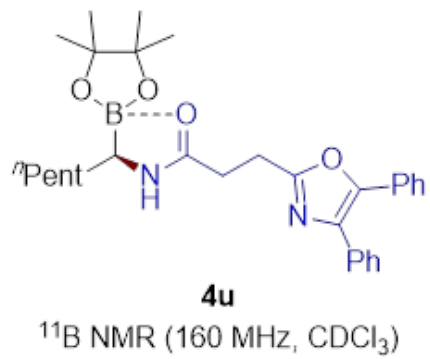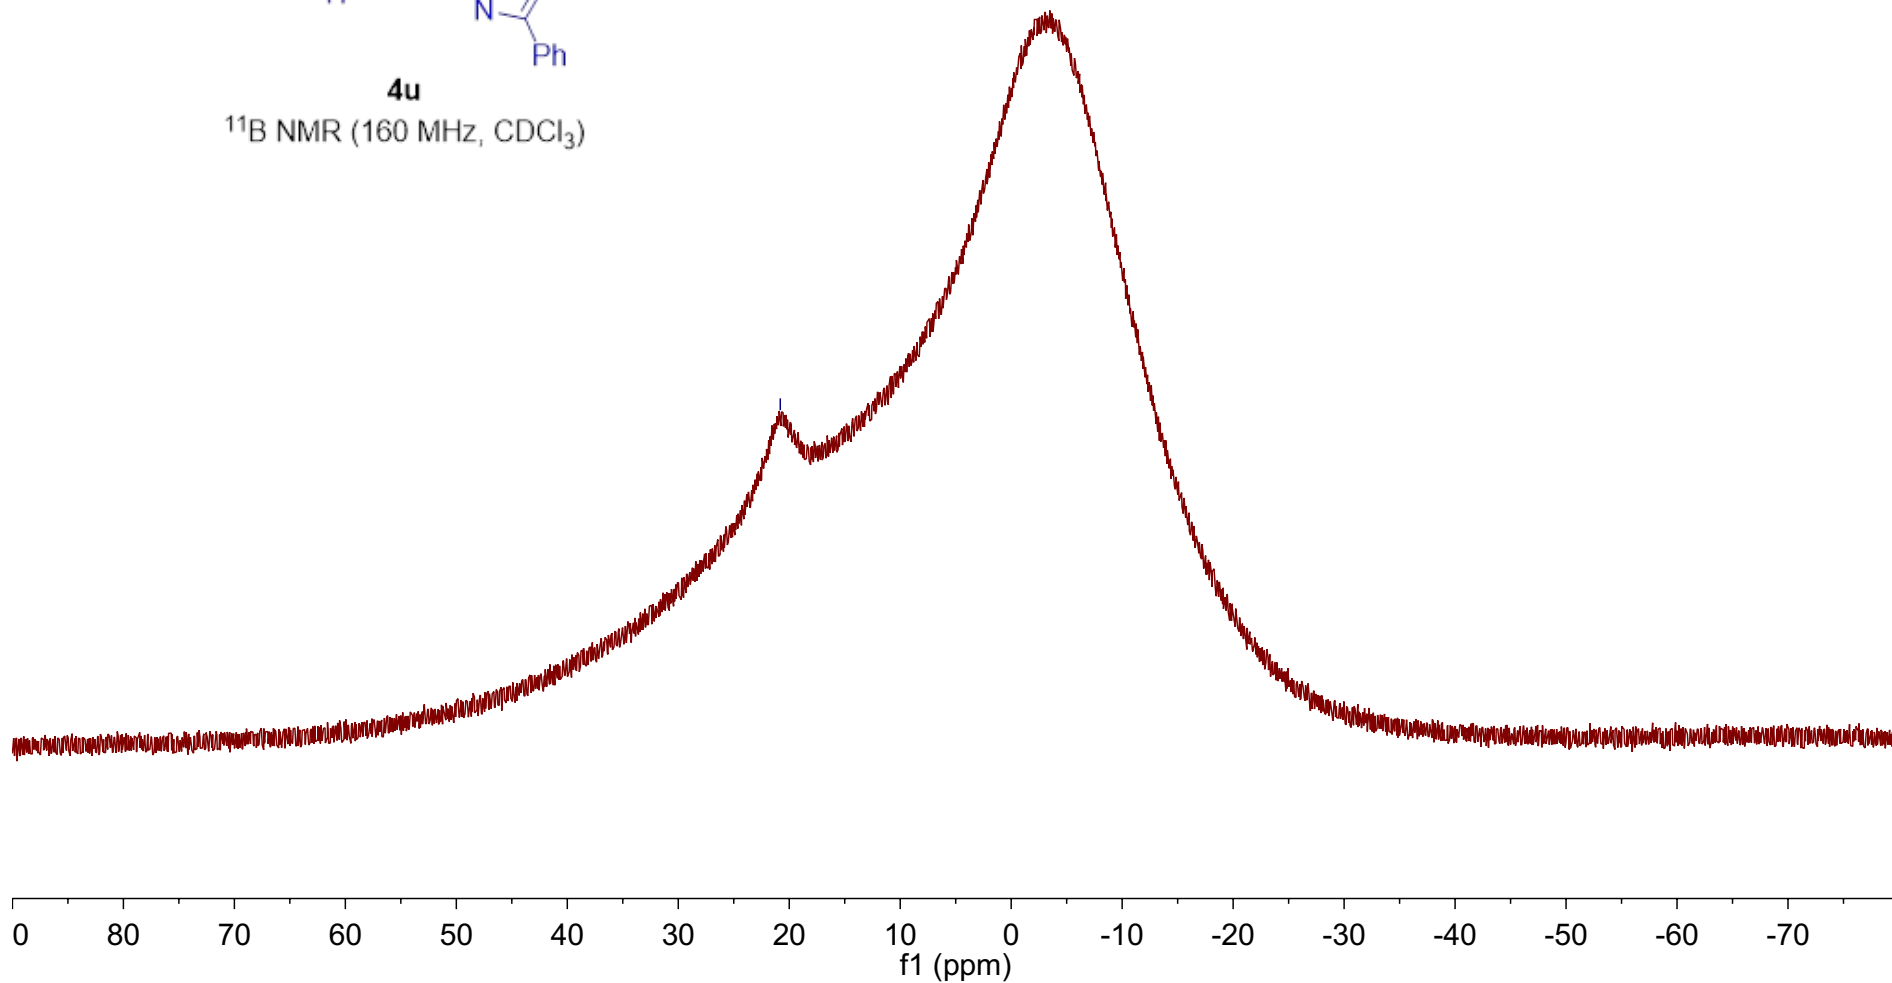

Supplementary Figure 118: <sup>11</sup>B NMR (160 MHz, CDCl<sub>3</sub>) spectrum of **4u**.

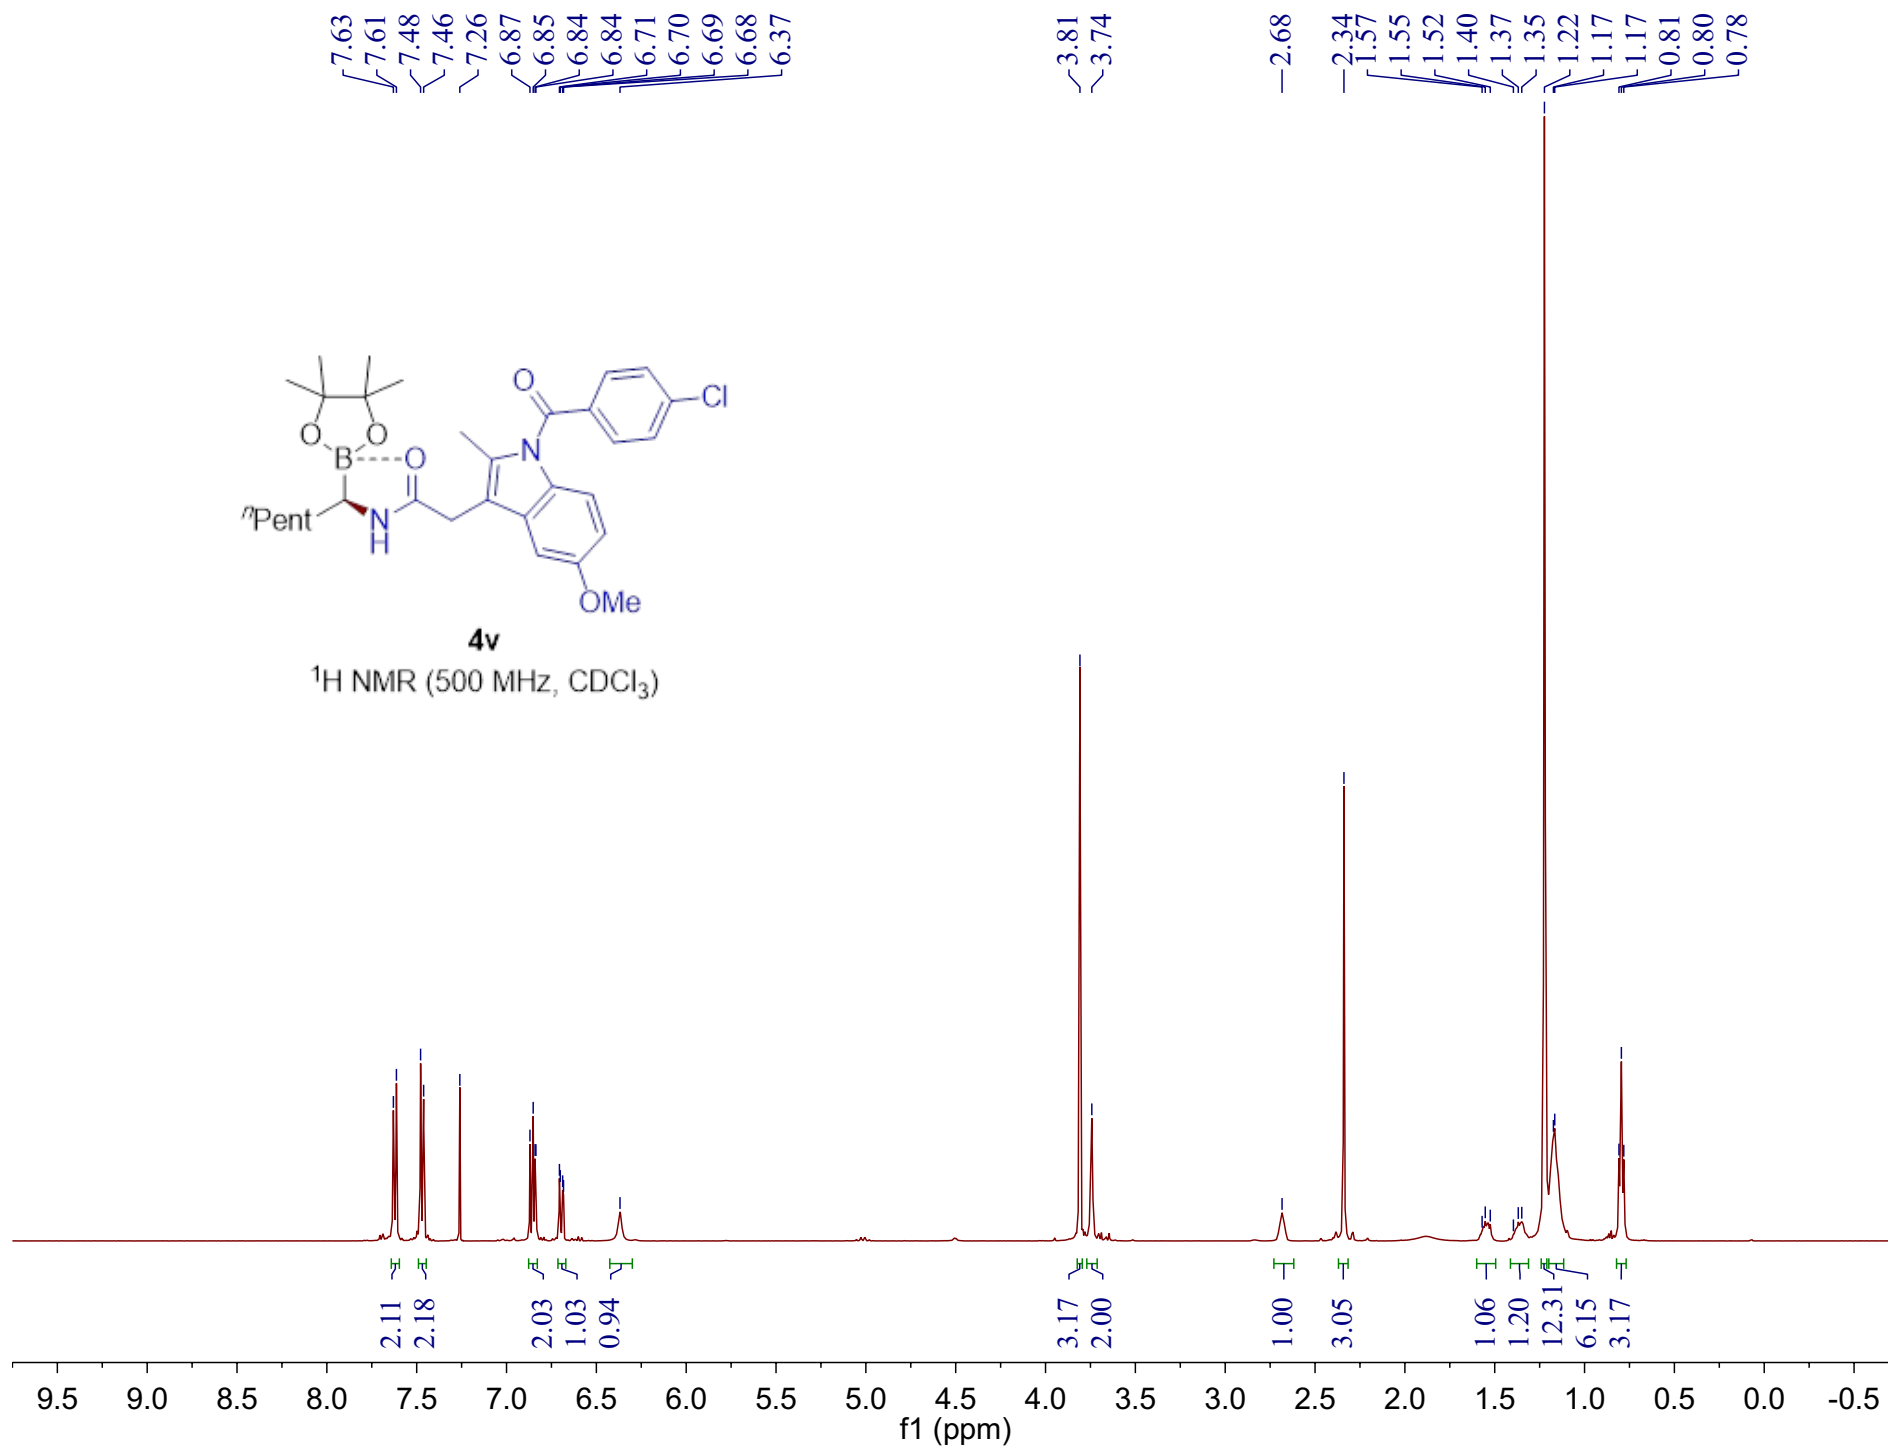

Supplementary Figure 119: <sup>1</sup>H NMR (500 MHz, CDCl<sub>3</sub>) spectrum of **4v**.

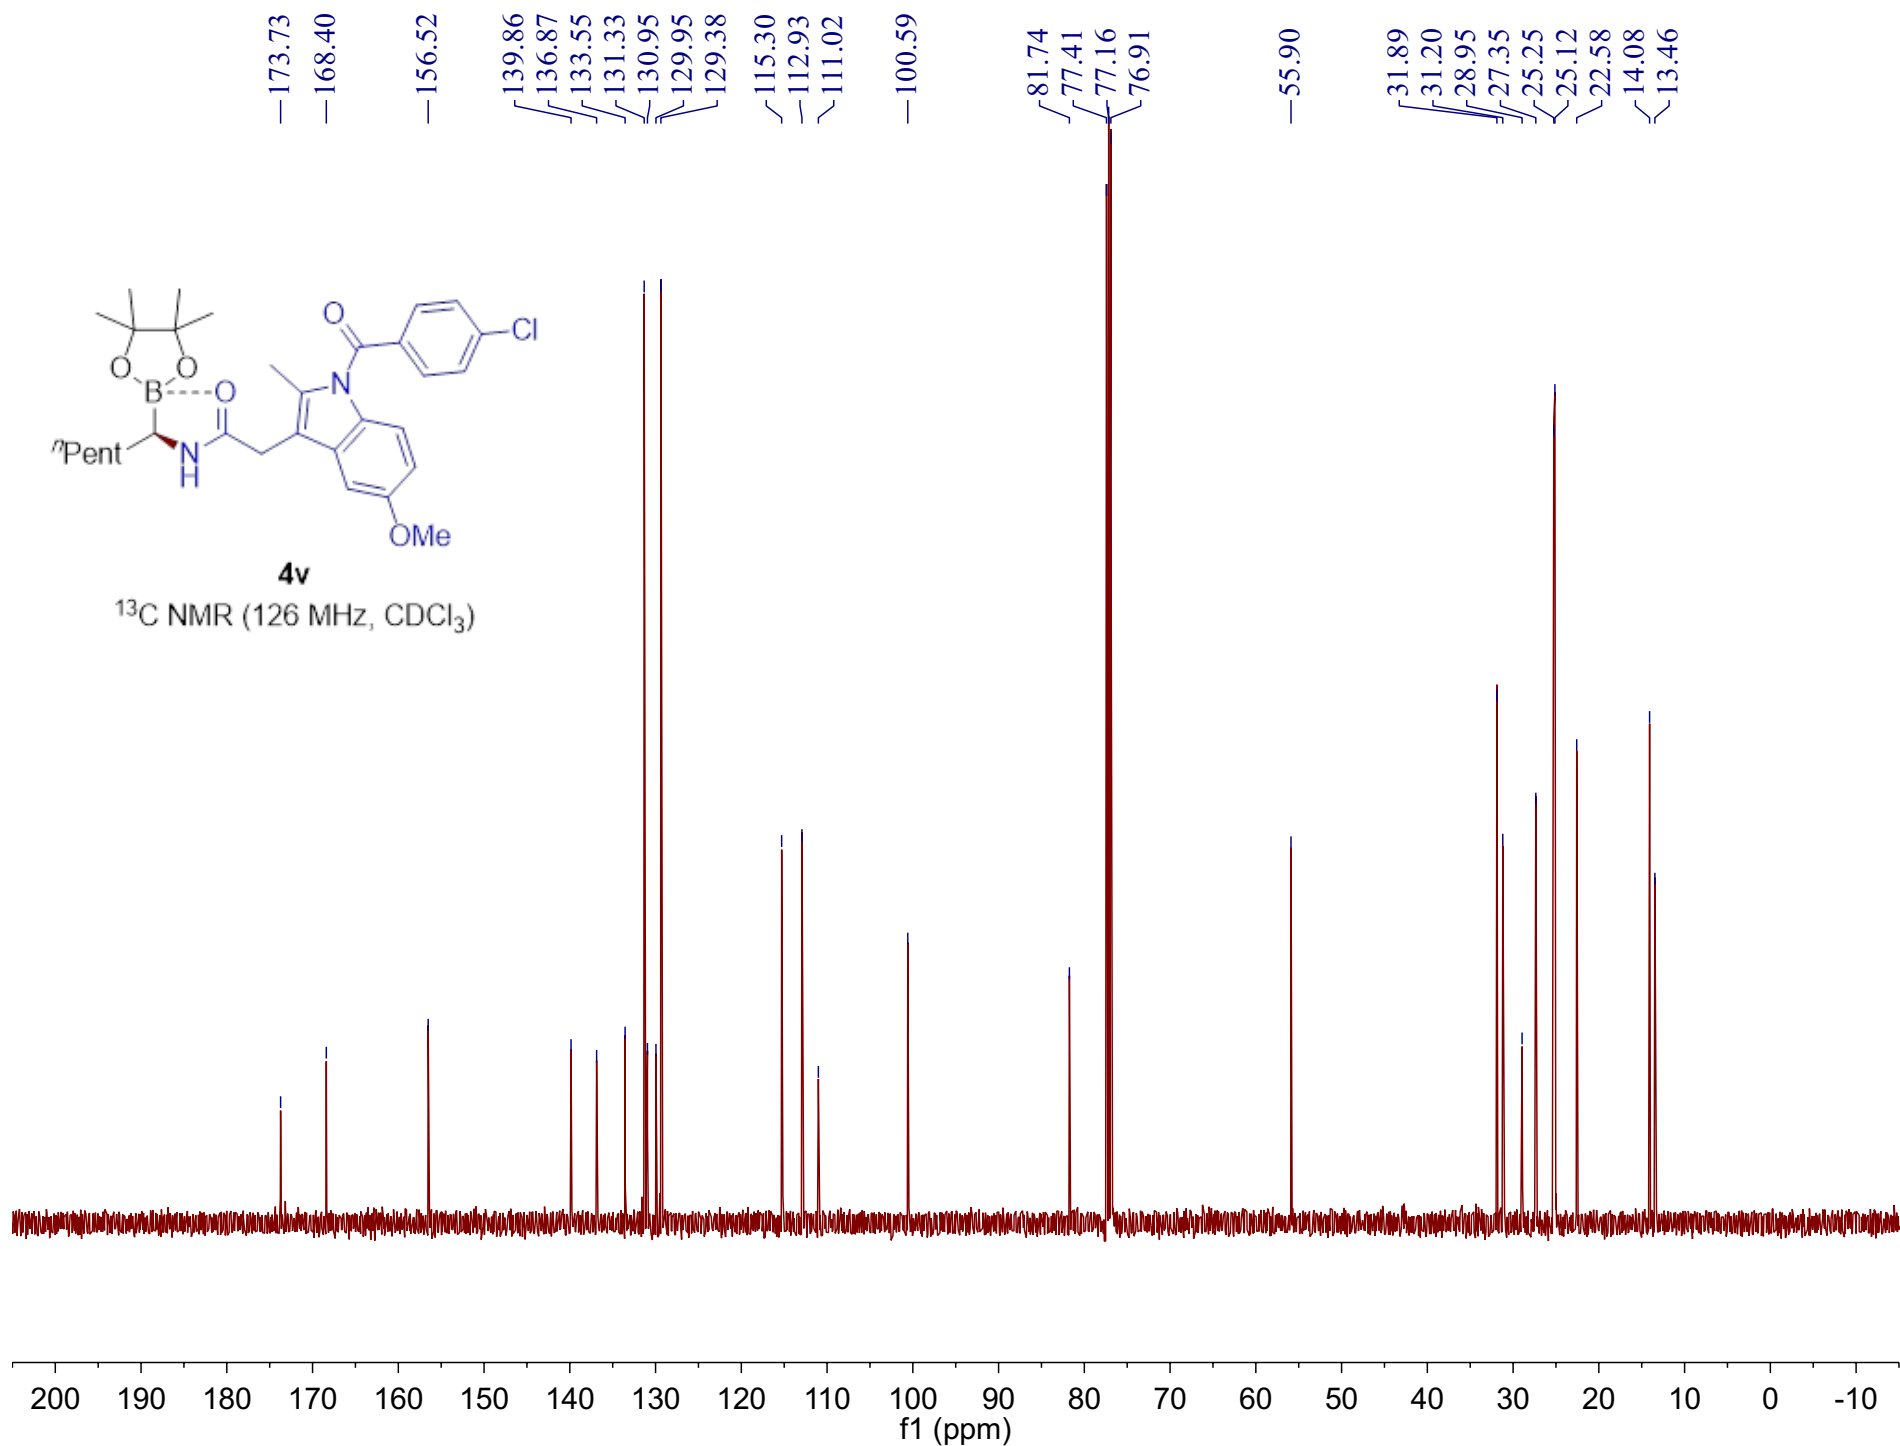

Supplementary Figure 120: <sup>13</sup>C NMR (126 MHz, CDCl<sub>3</sub>) spectrum of **4v**.



-21.85

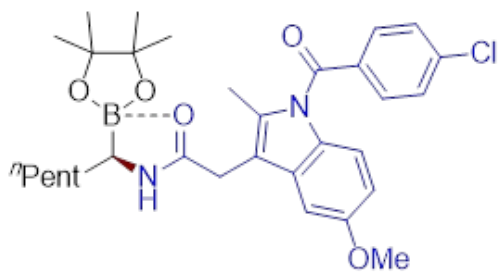

**4v**

$^{11}\text{B}$  NMR (160 MHz,  $\text{CDCl}_3$ )

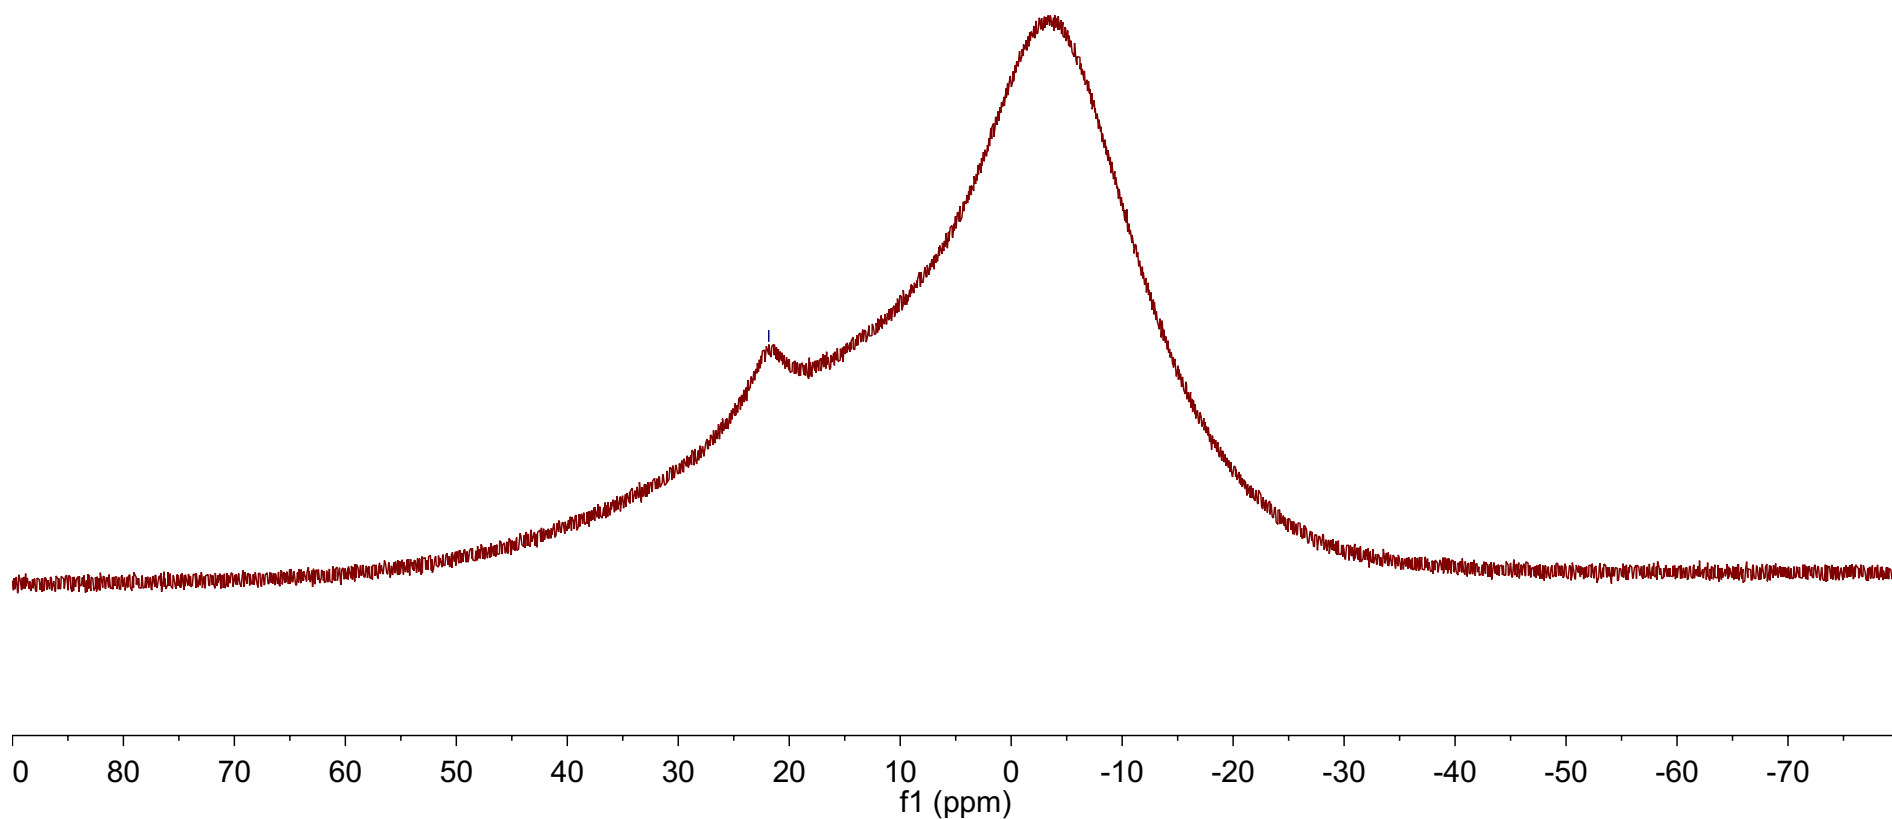

**Supplementary Figure 121:**  $^{11}\text{B}$  NMR (160 MHz,  $\text{CDCl}_3$ ) spectrum of **4v**.

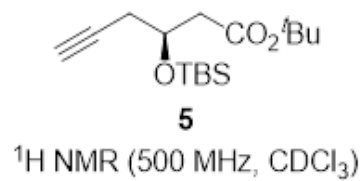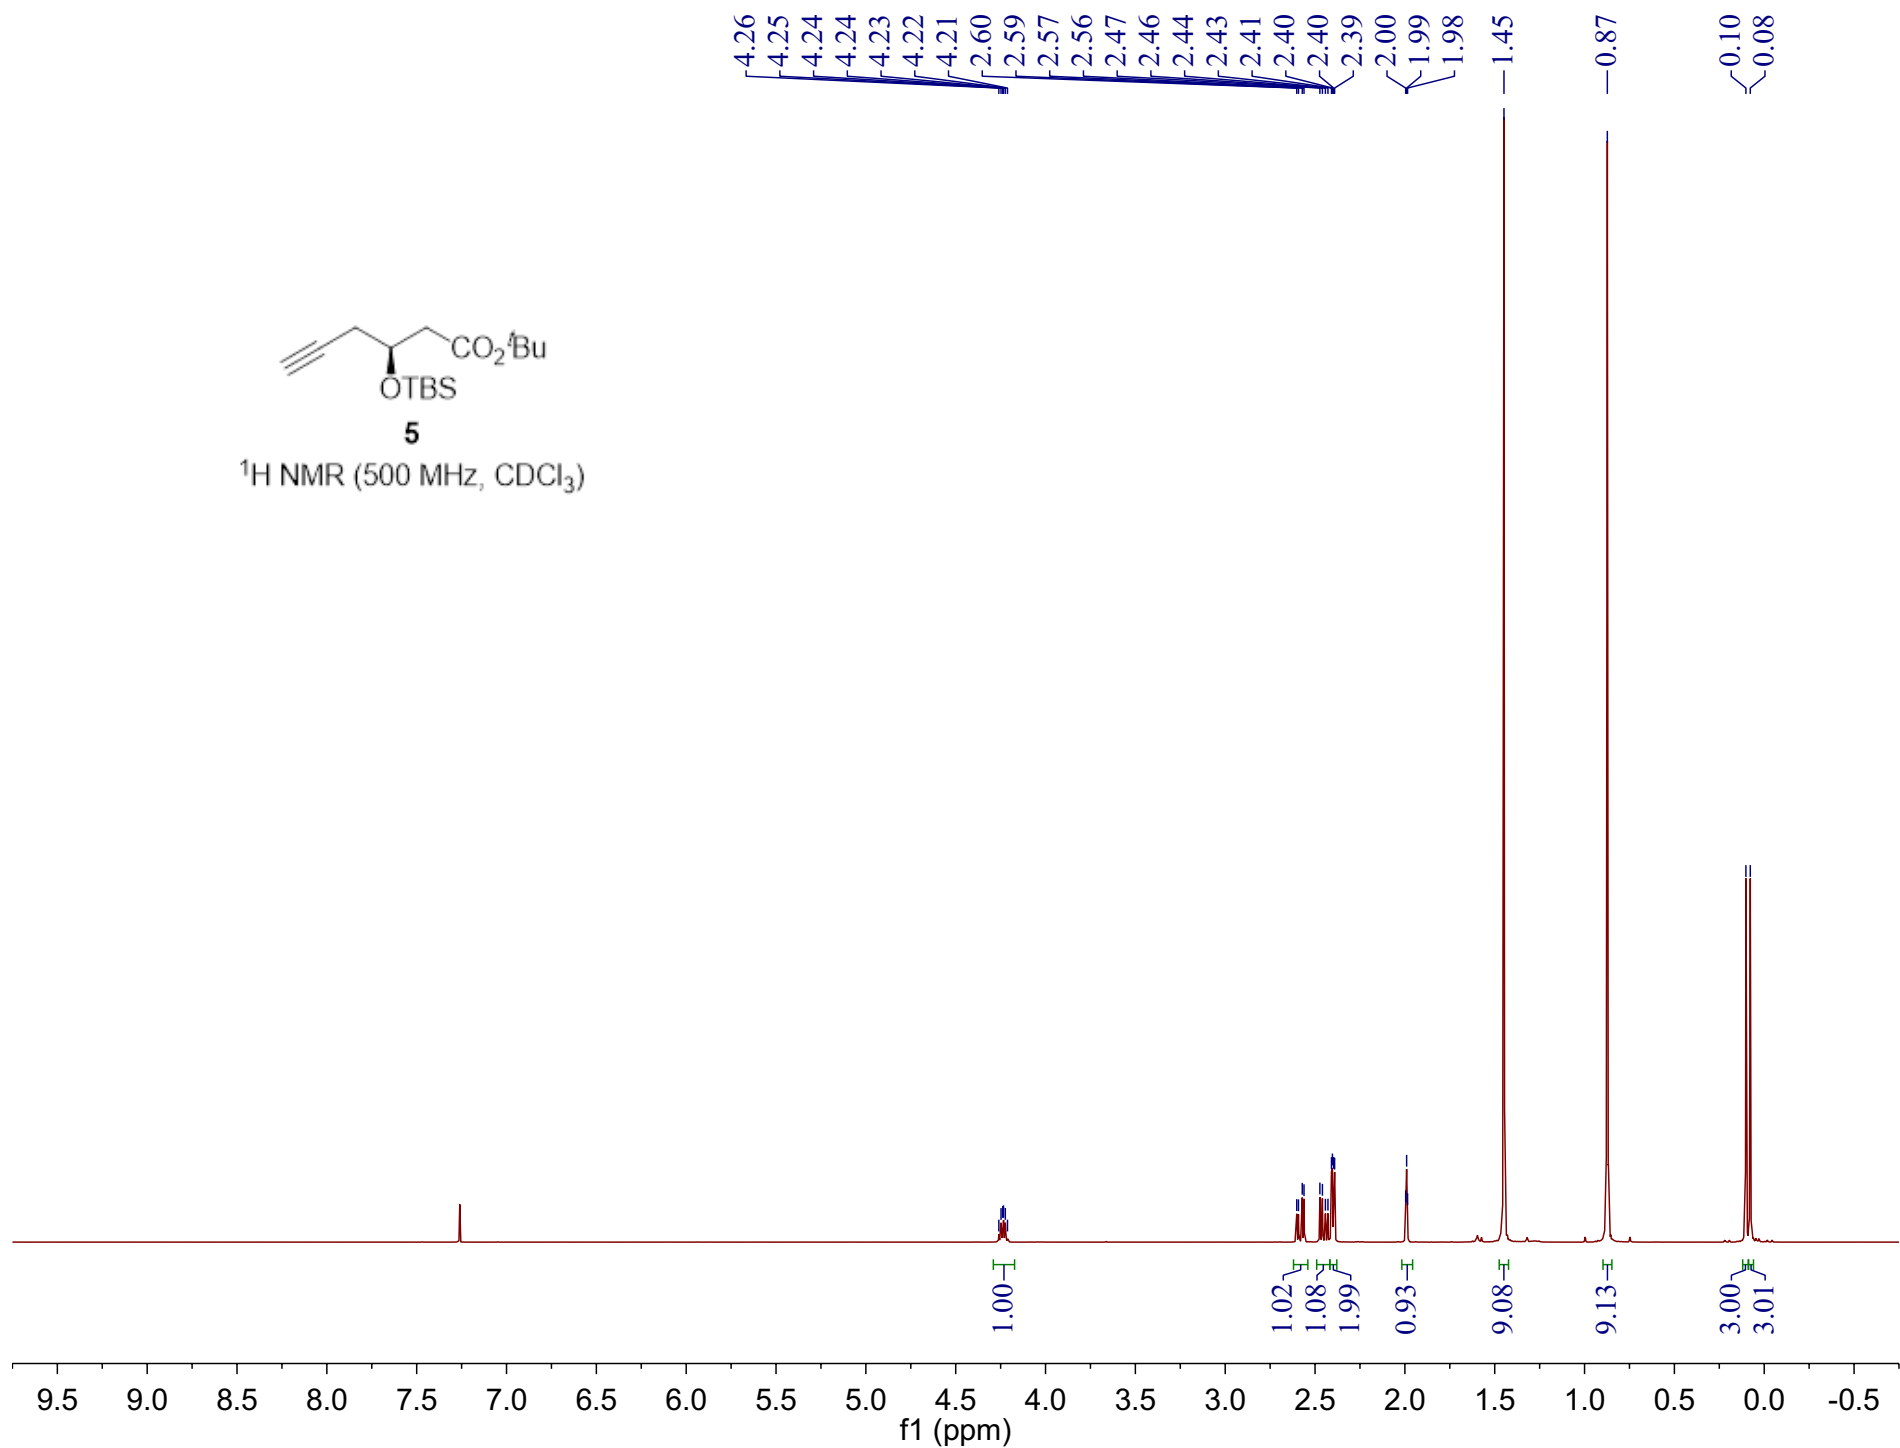

Supplementary Figure 122: <sup>1</sup>H NMR (500 MHz, CDCl<sub>3</sub>) spectrum of **5**.

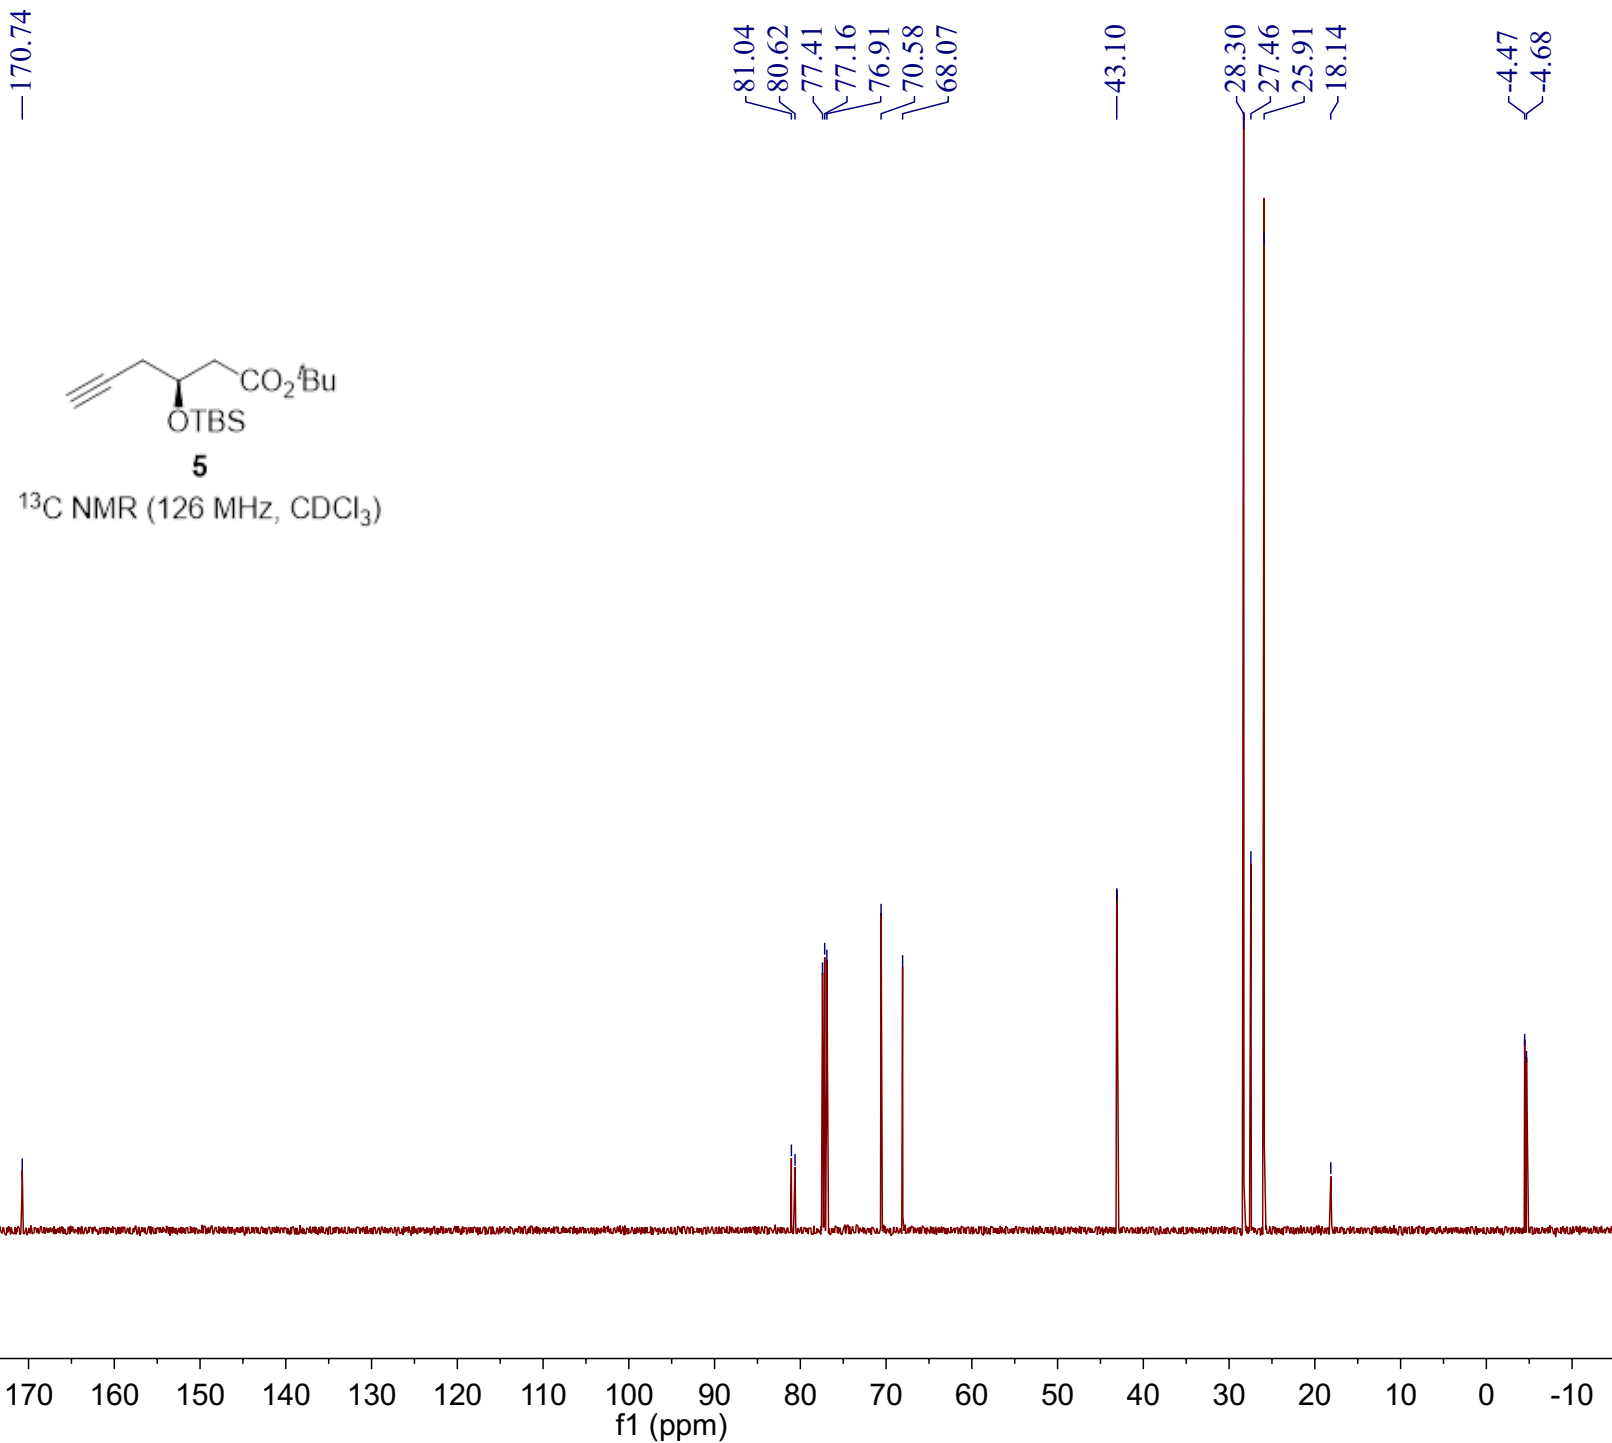

Supplementary Figure 123: <sup>13</sup>C NMR (126 MHz, CDCl<sub>3</sub>) spectrum of **5**.

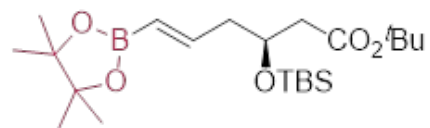

**6**

$^1\text{H NMR}$  (500 MHz,  $\text{CDCl}_3$ )

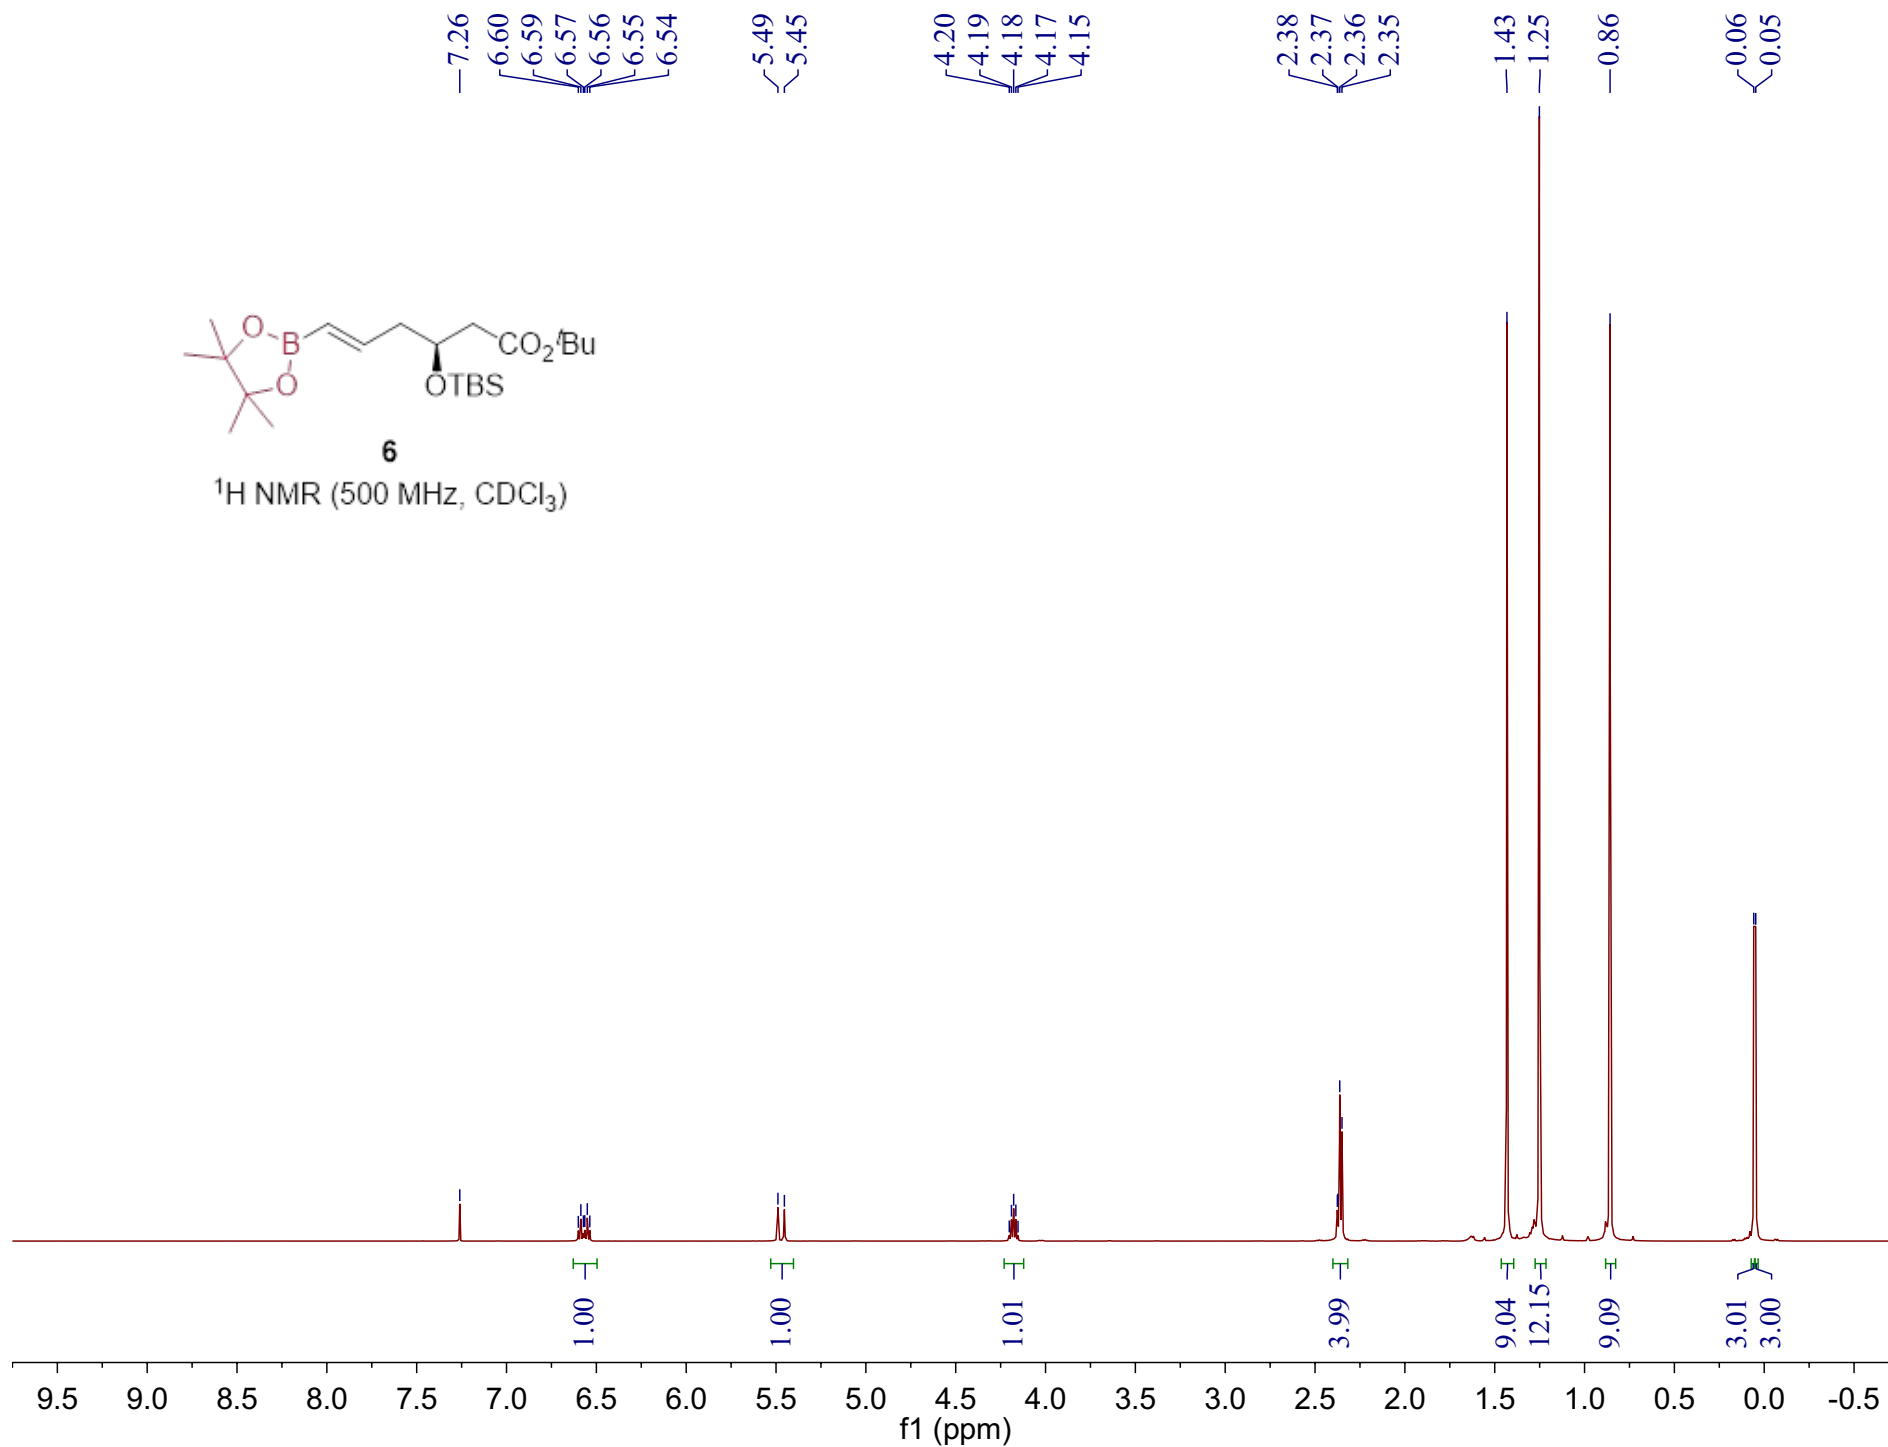

Supplementary Figure 124:  $^1\text{H NMR}$  (500 MHz,  $\text{CDCl}_3$ ) spectrum of **6**.

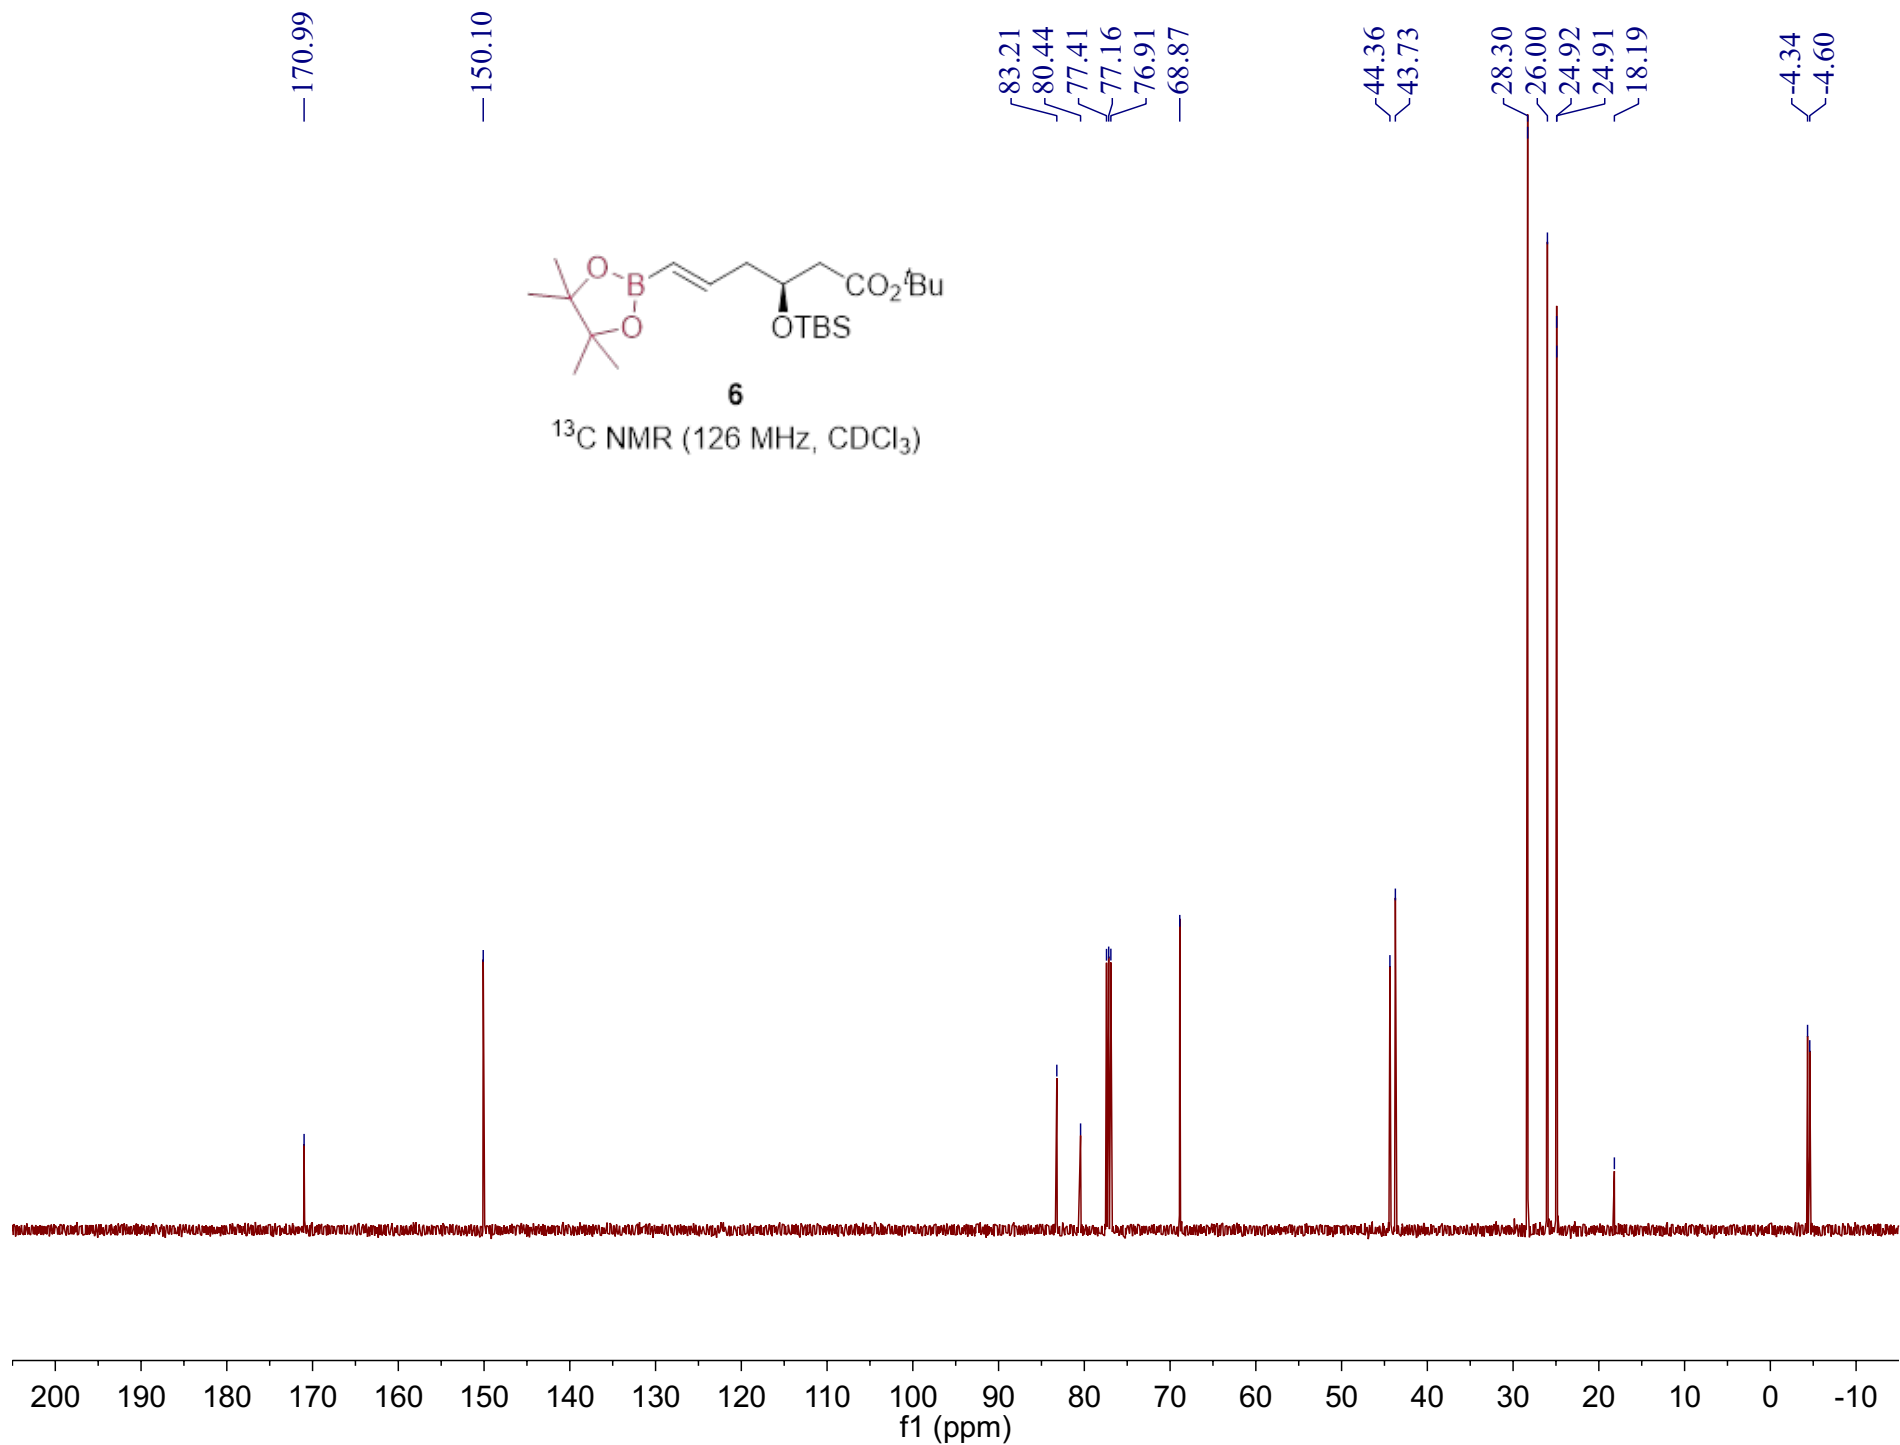

Supplementary Figure 125:  $^{13}\text{C}$  NMR (126 MHz,  $\text{CDCl}_3$ ) spectrum of **6**.

-29.86

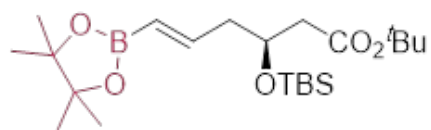

**6**

$^{11}\text{B}$  NMR (160 MHz,  $\text{CDCl}_3$ )

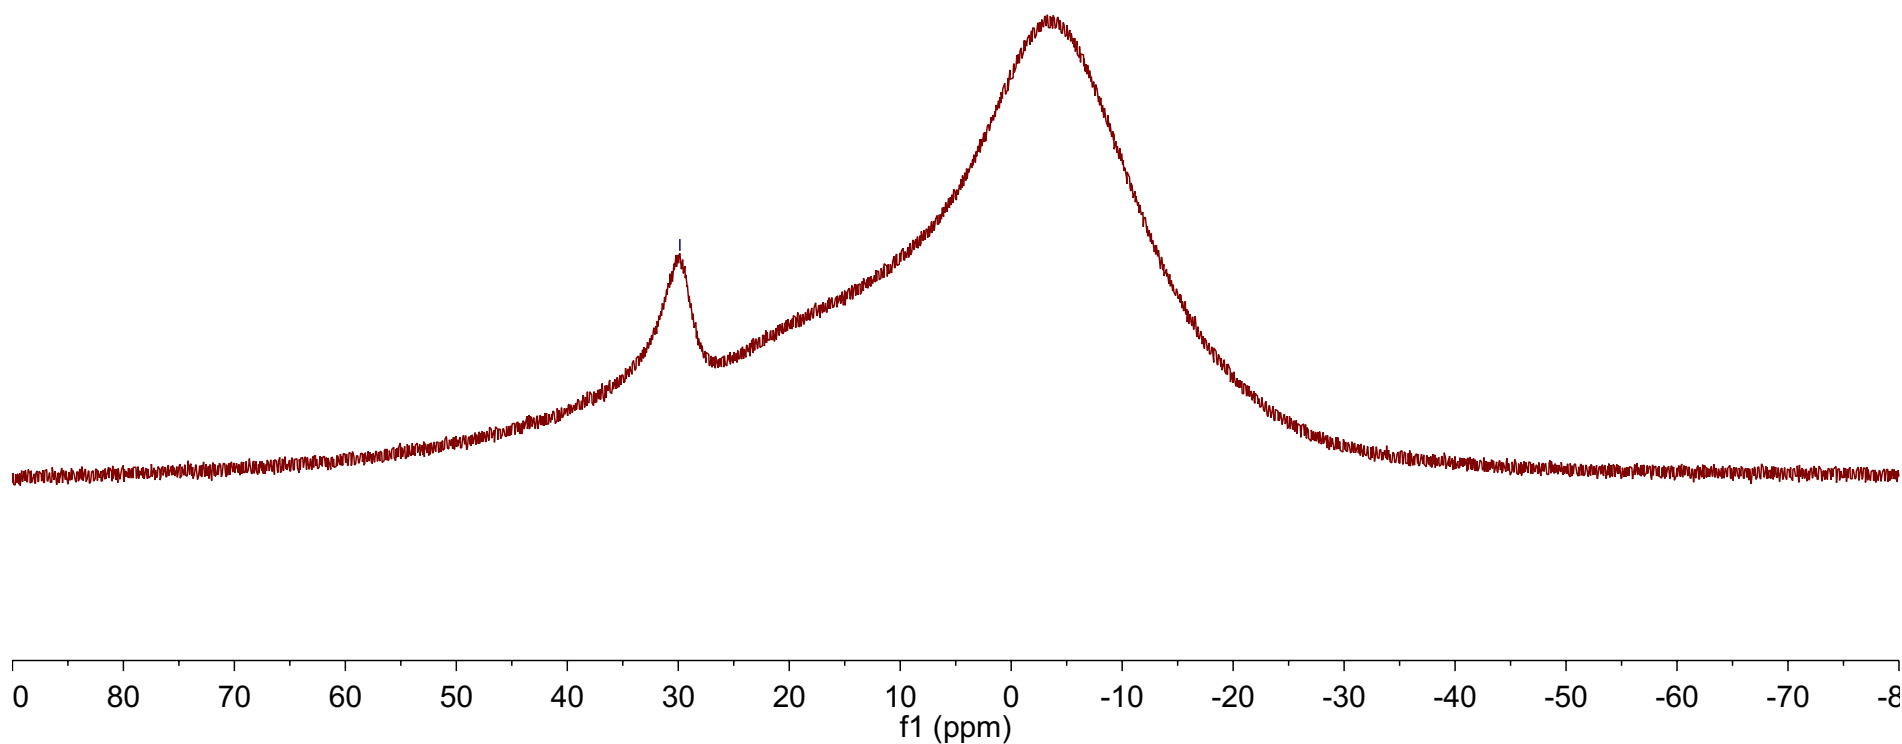

Supplementary Figure 126:  $^{11}\text{B}$  NMR (160 MHz,  $\text{CDCl}_3$ ) spectrum of **6**.

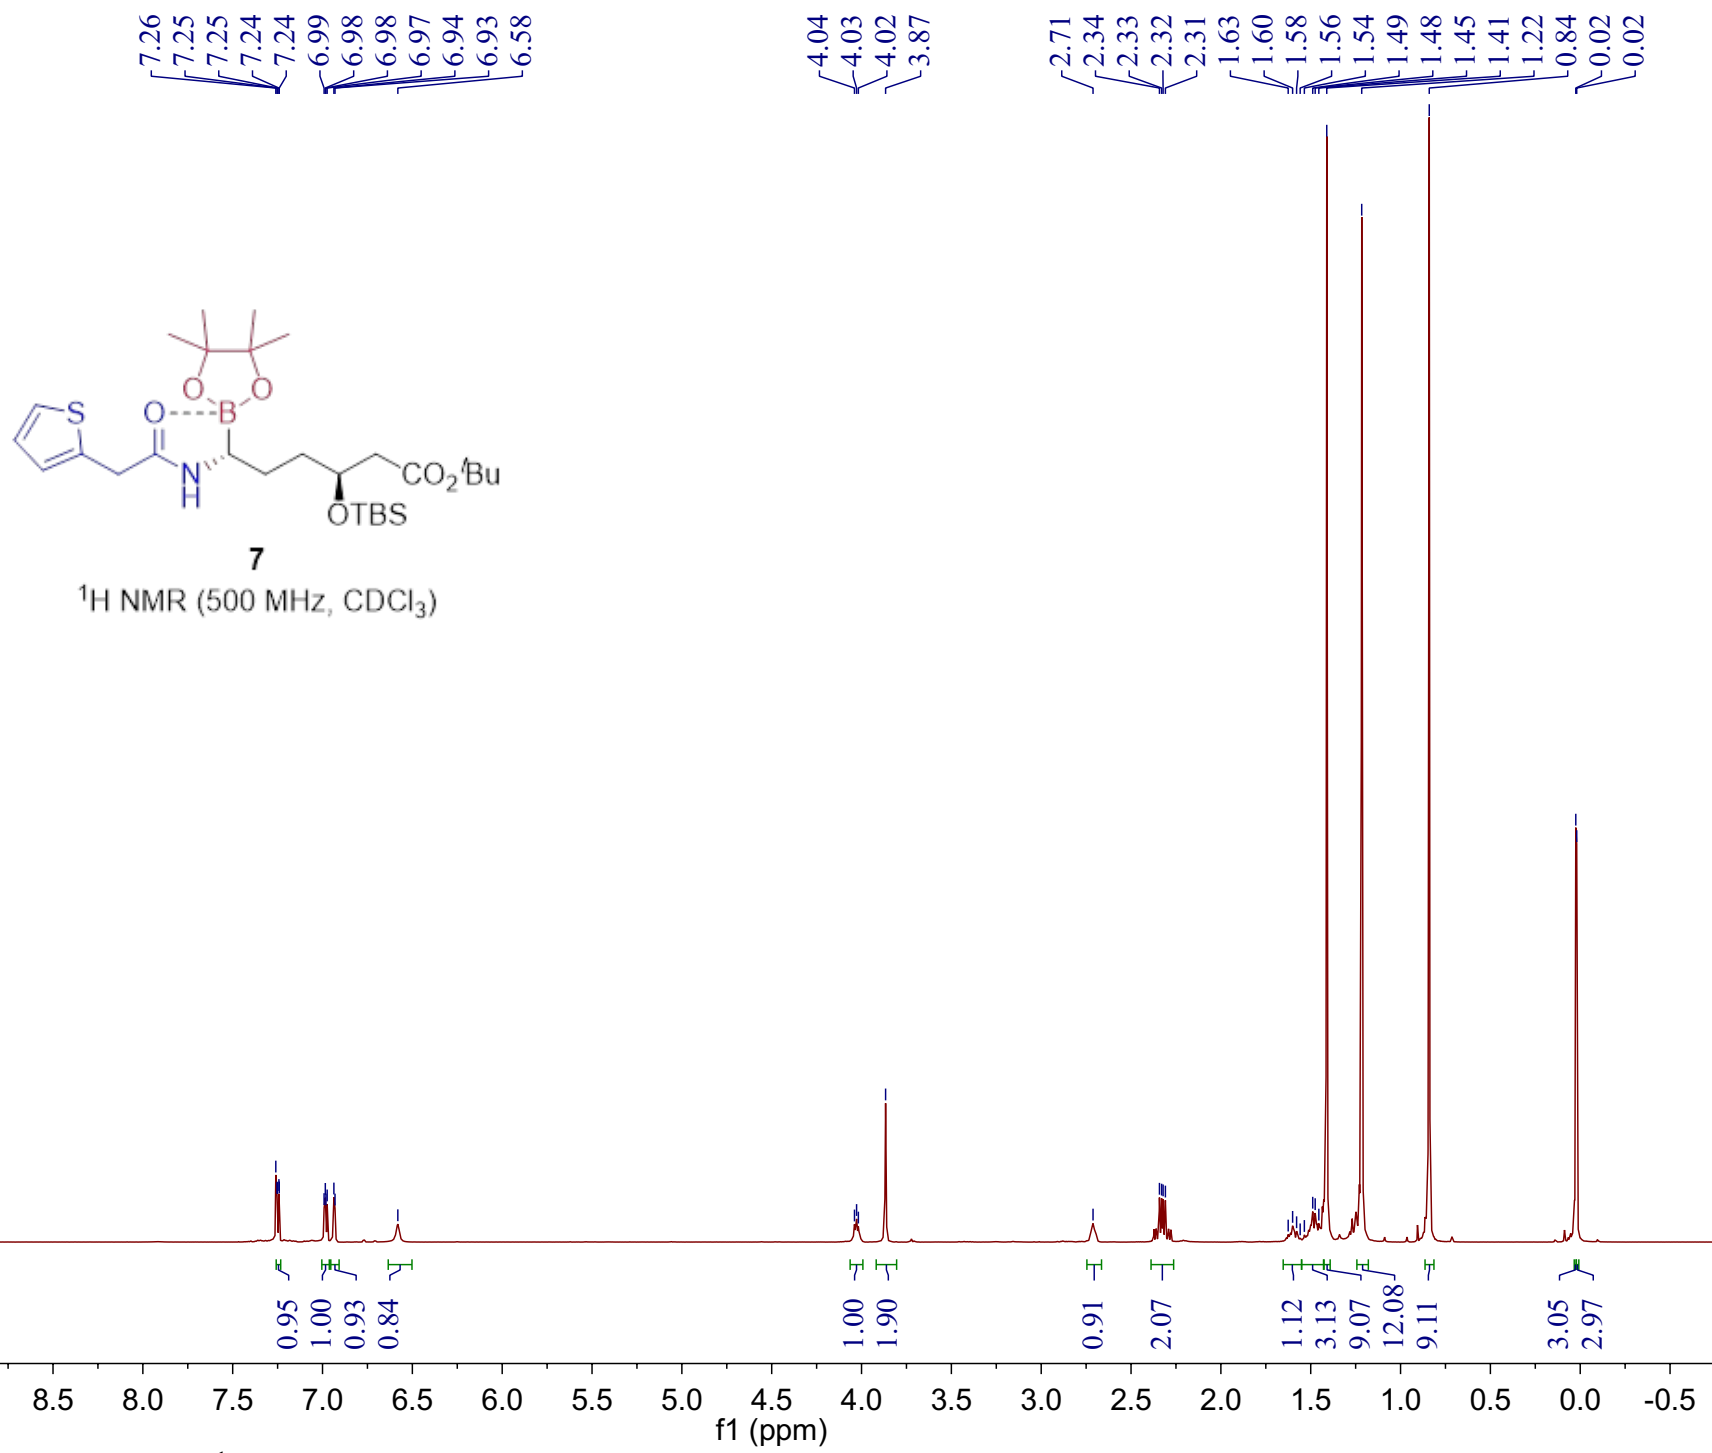

Supplementary Figure 127: <sup>1</sup>H NMR (500 MHz, CDCl<sub>3</sub>) spectrum of 7.

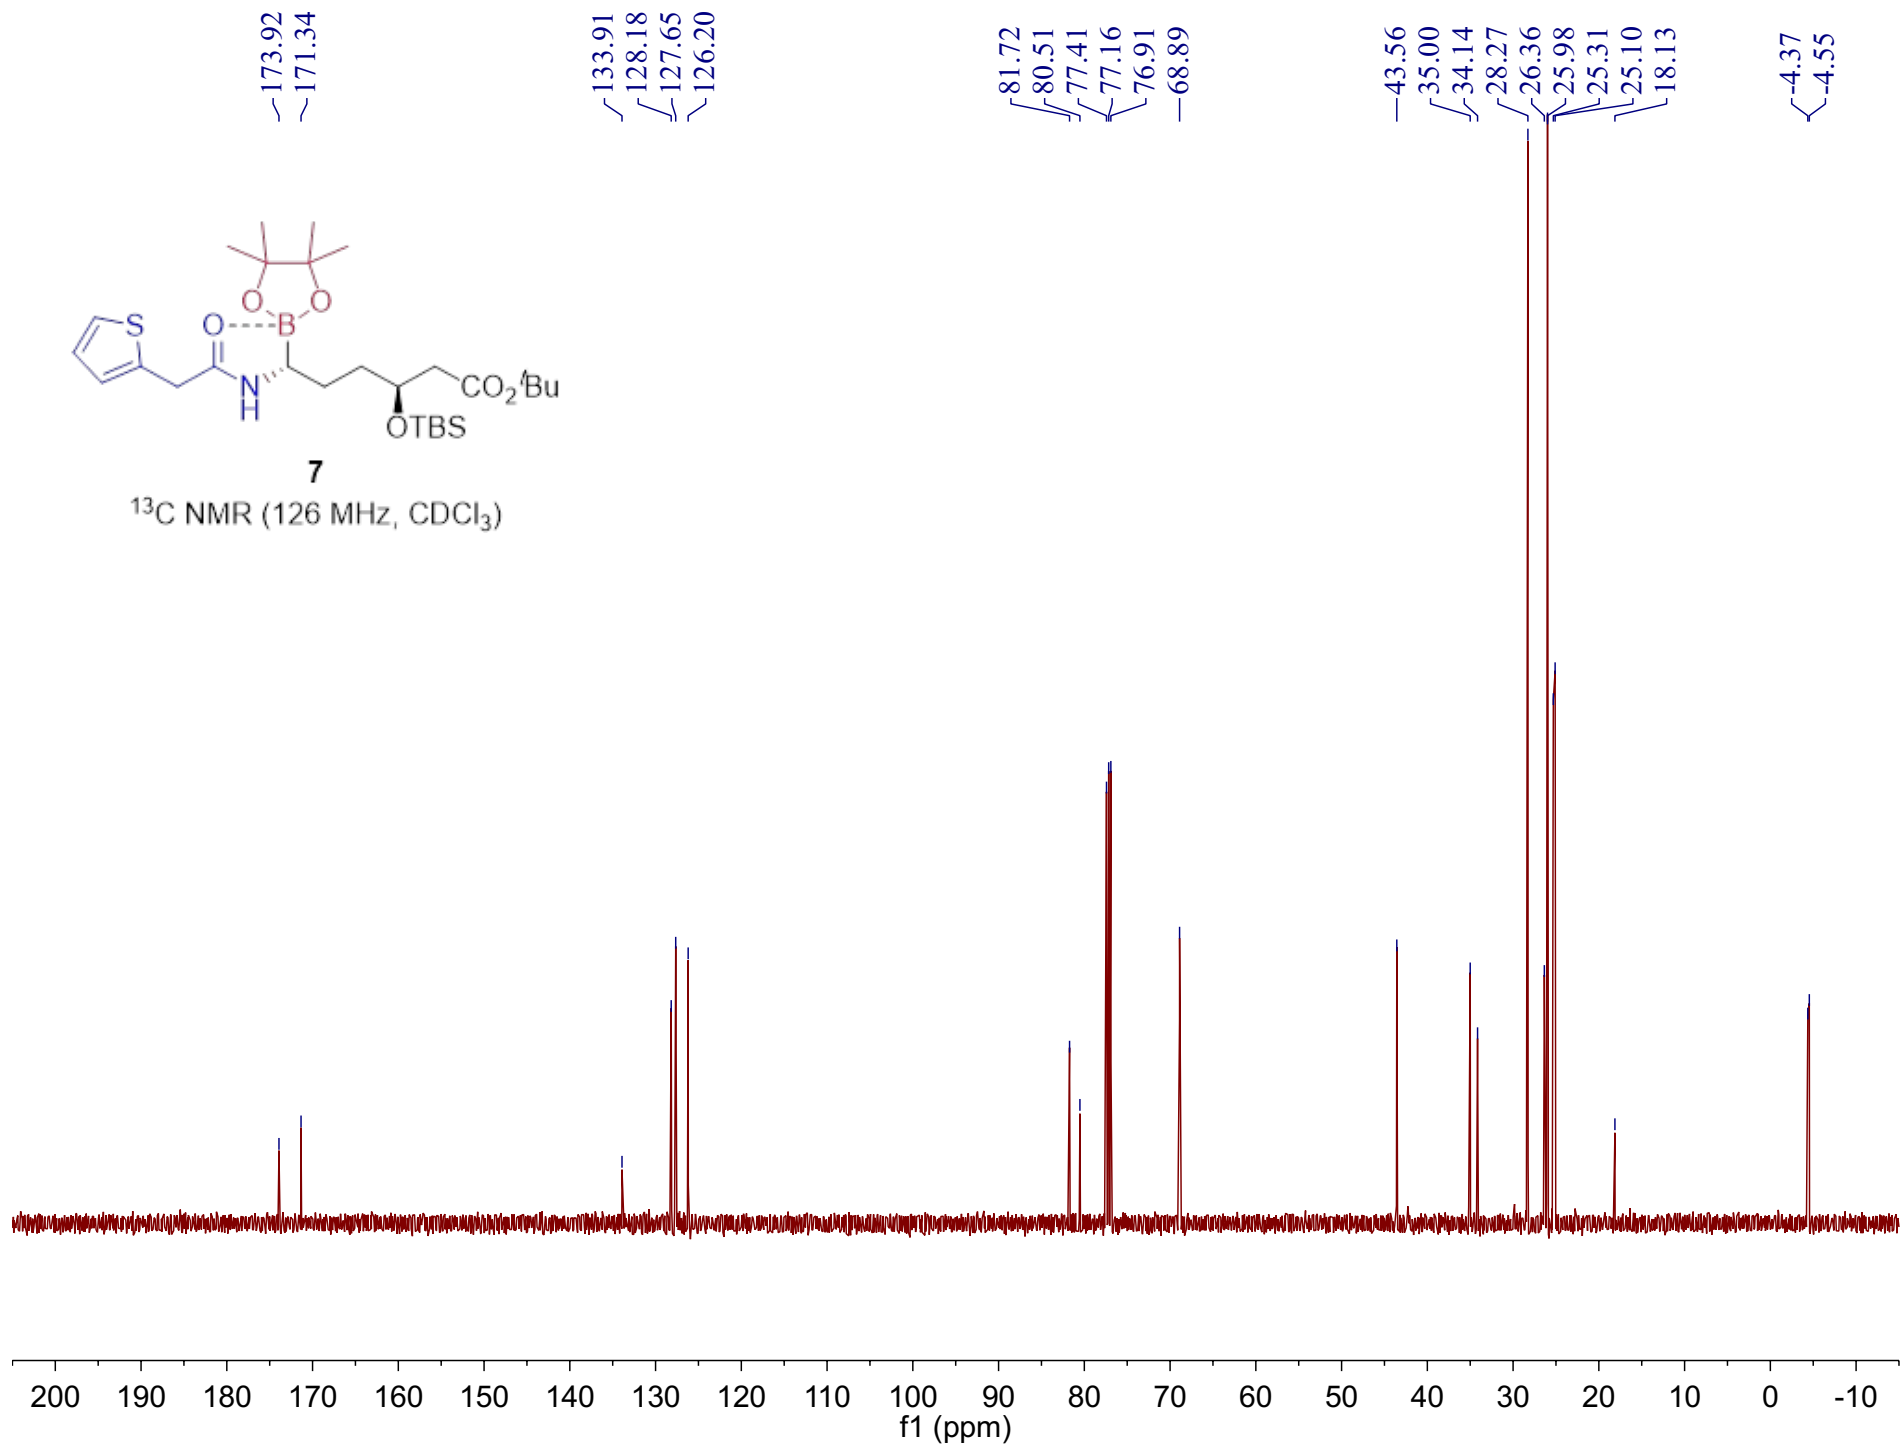

Supplementary Figure 128:  $^{13}\text{C}$  NMR (126 MHz,  $\text{CDCl}_3$ ) spectrum of **7**.



-21.87

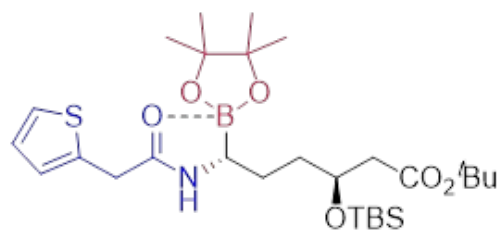

7

$^{11}\text{B}$  NMR (160 MHz,  $\text{CDCl}_3$ )

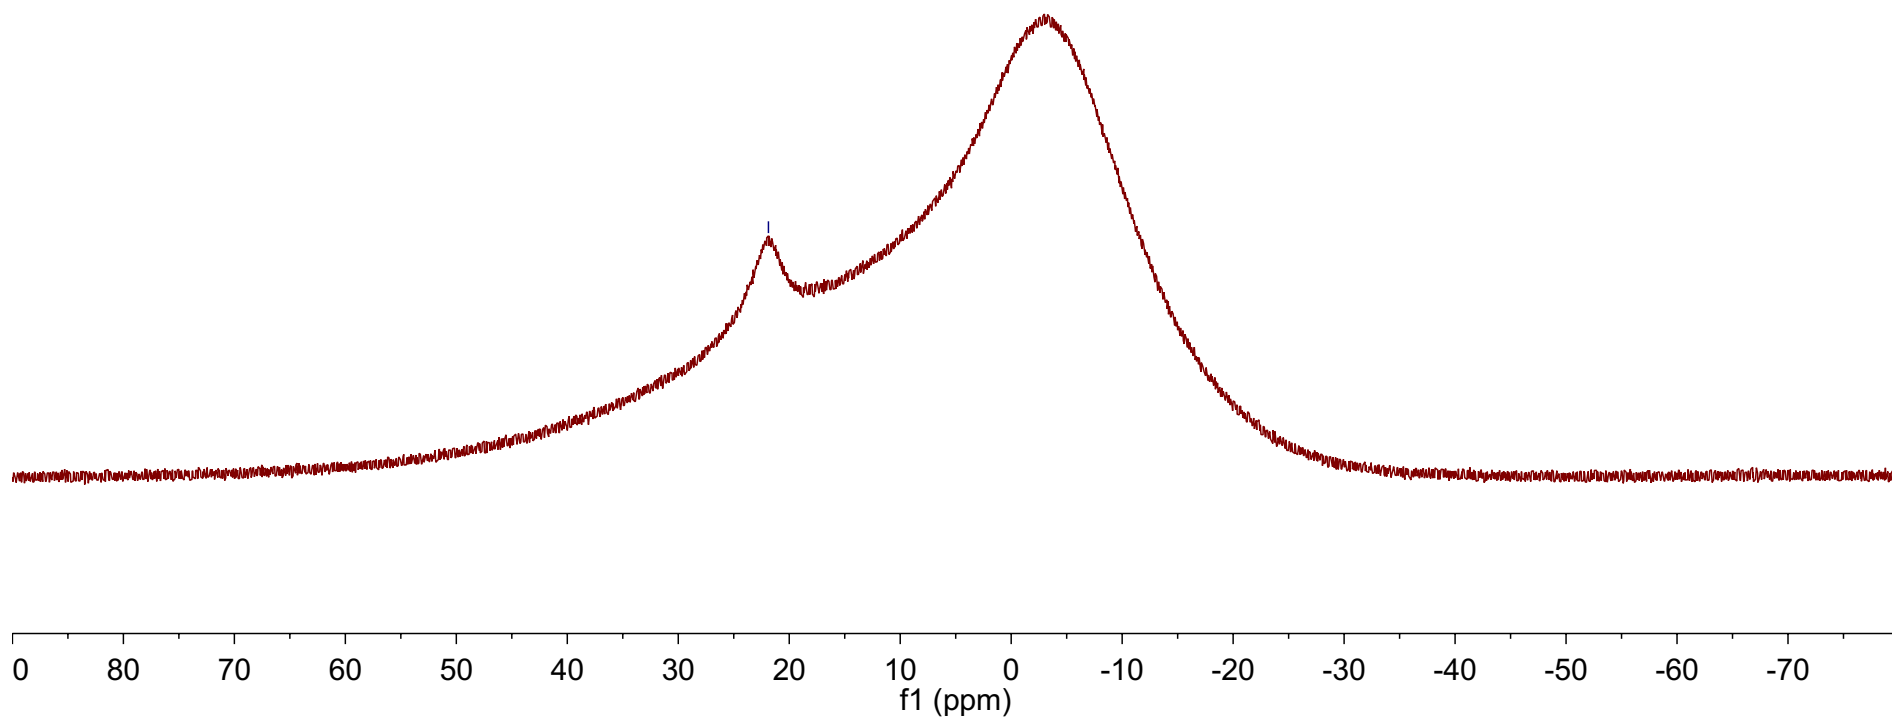

Supplementary Figure 129:  $^{11}\text{B}$  NMR (160 MHz,  $\text{CDCl}_3$ ) spectrum of 7.

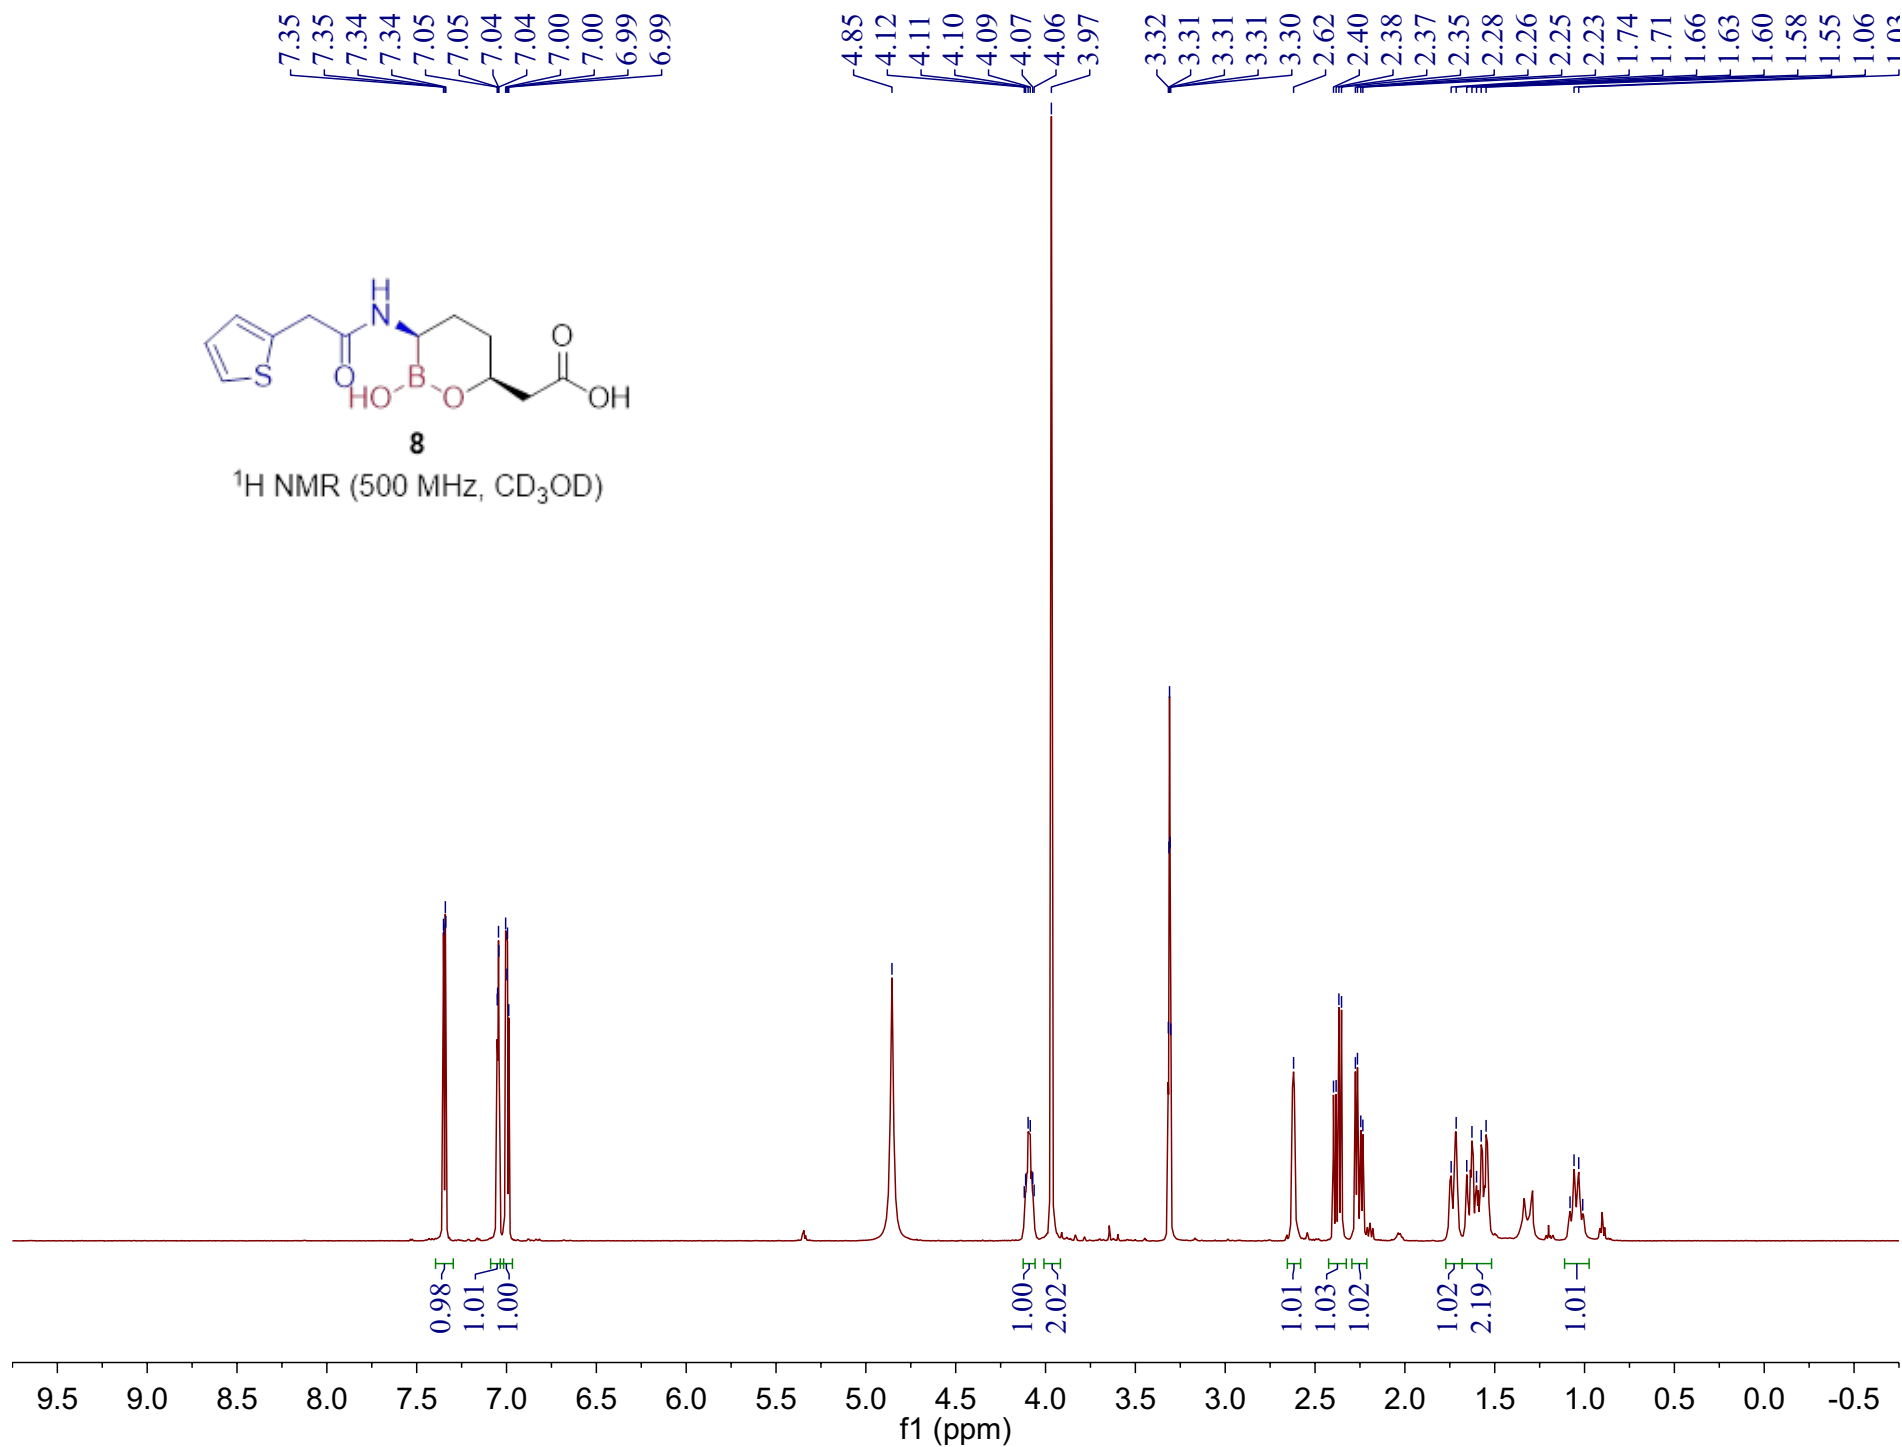

Supplementary Figure 130: <sup>1</sup>H NMR (500 MHz, CD<sub>3</sub>OD) spectrum of **8**.

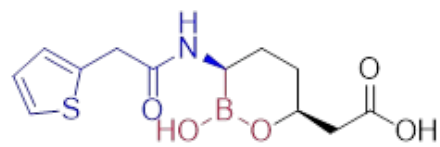

**8**

$^{13}\text{C}$  NMR (126 MHz,  $\text{CD}_3\text{OD}$ )

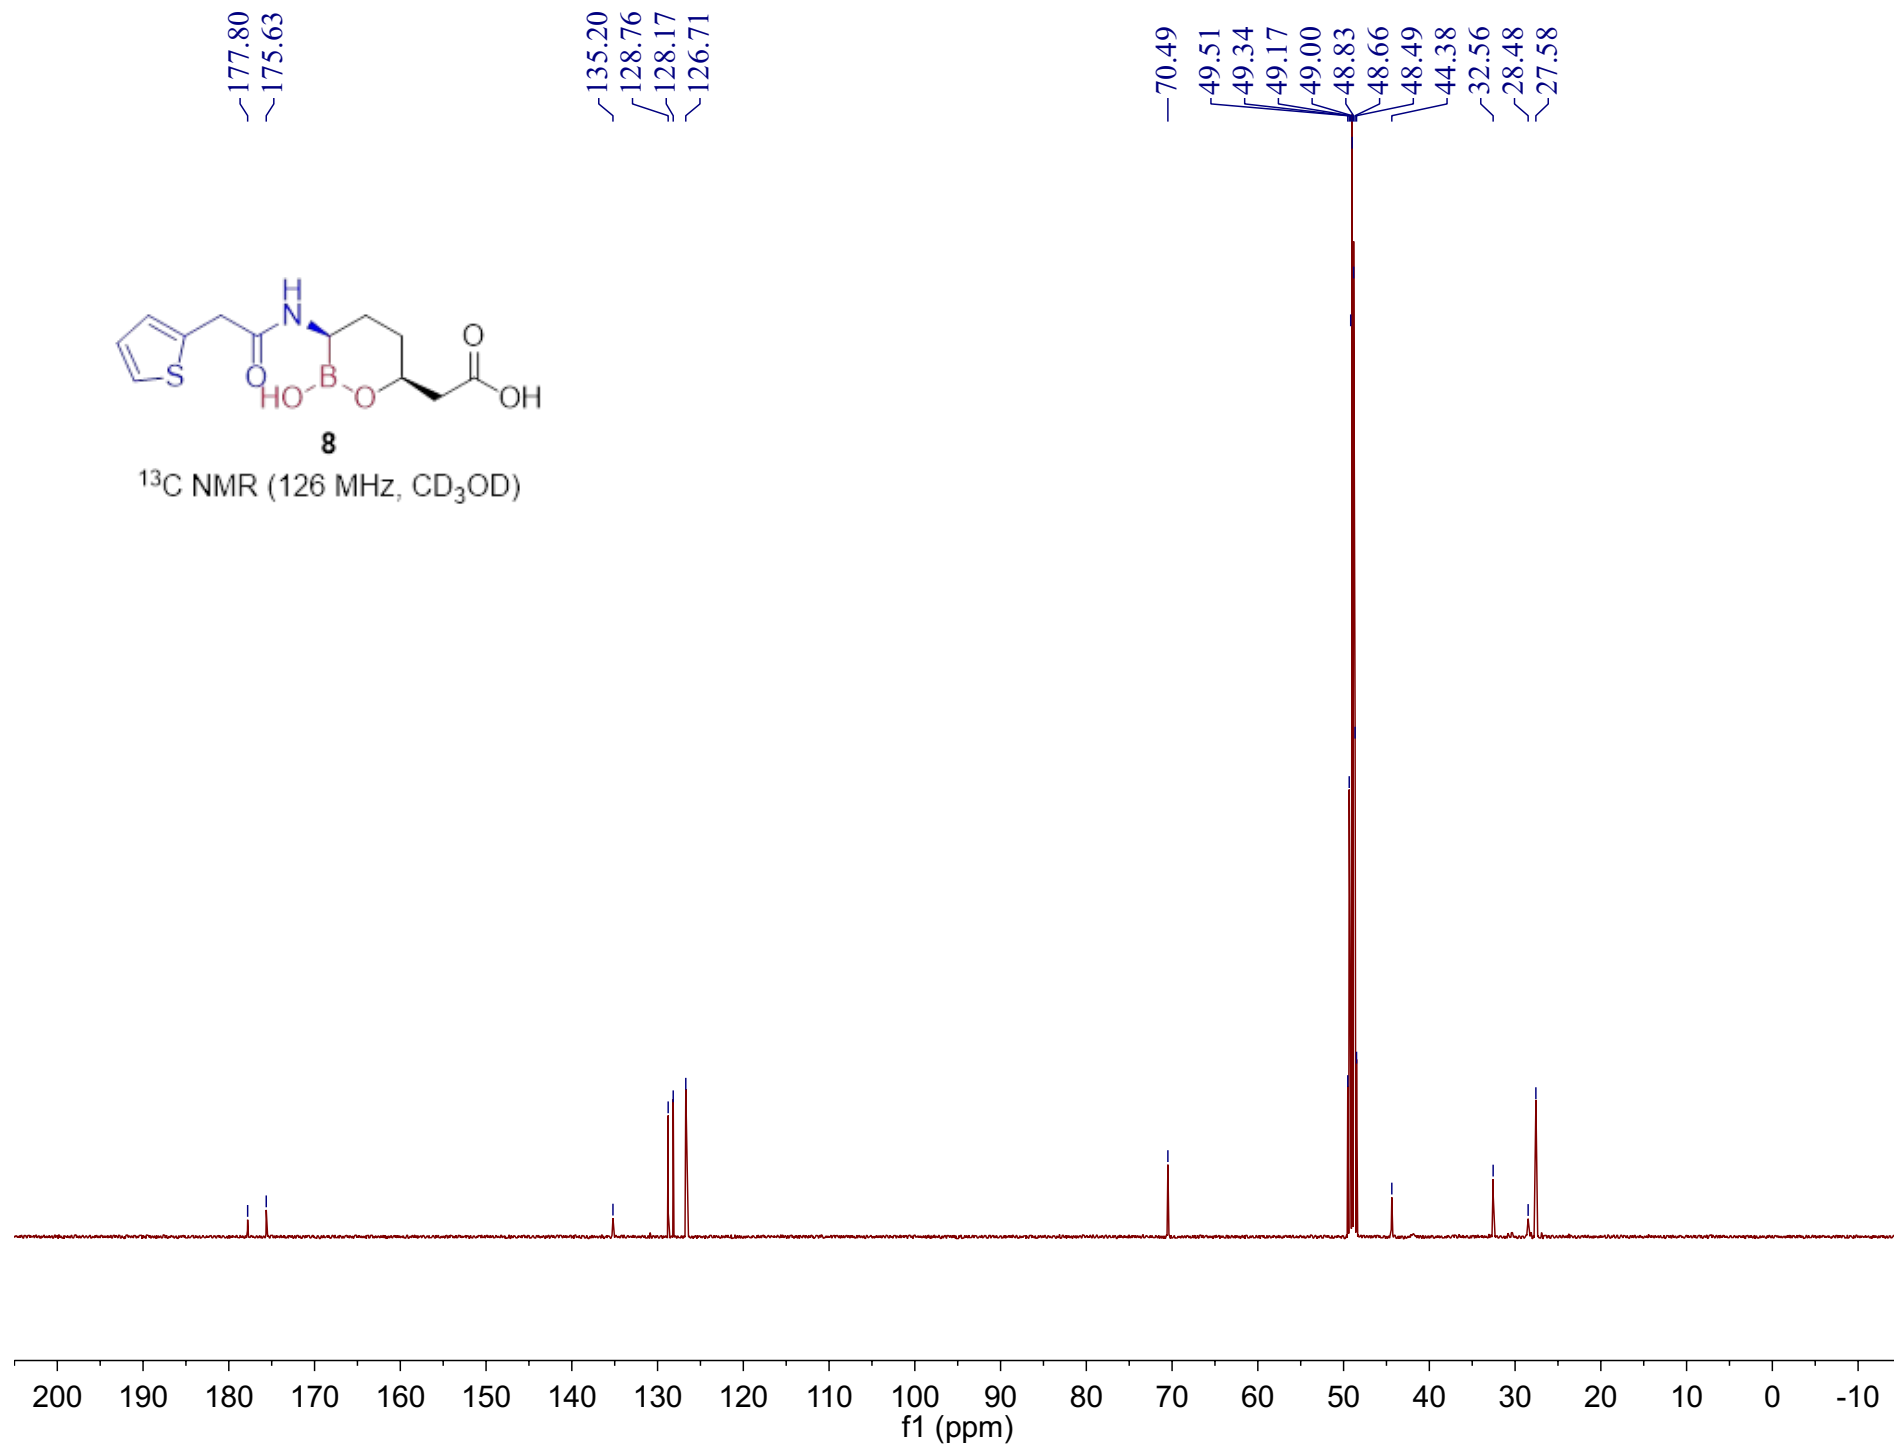

Supplementary Figure 131:  $^{13}\text{C}$  NMR (126 MHz,  $\text{CD}_3\text{OD}$ ) spectrum of **8**.

-11.71

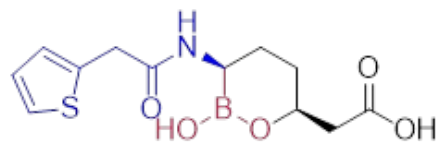

**8**

$^{11}\text{B}$  NMR (160 MHz,  $\text{CD}_3\text{OD}$ )

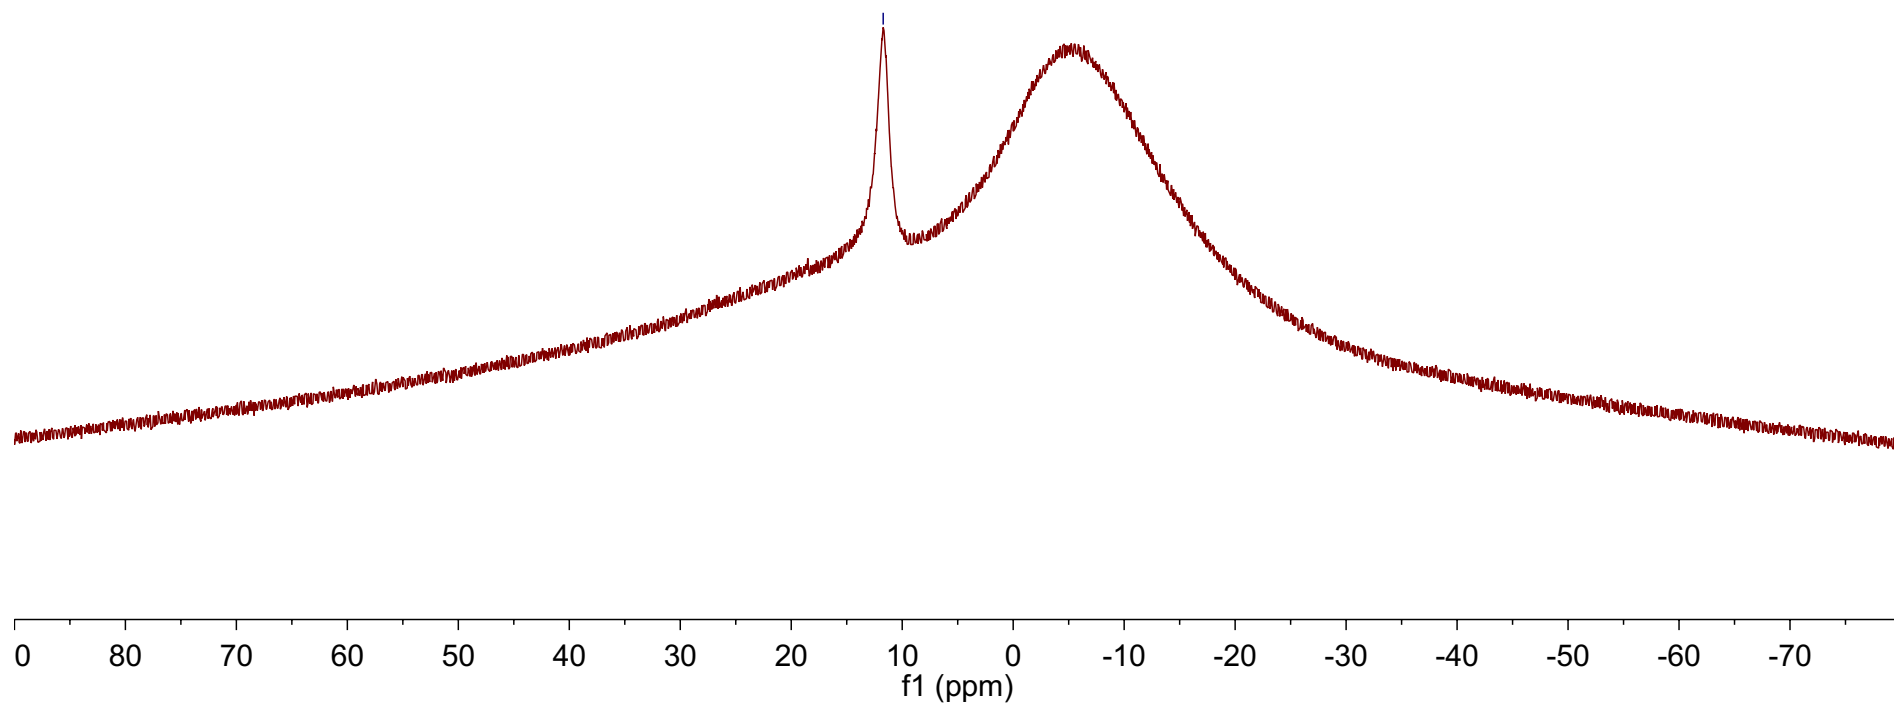

Supplementary Figure 132:  $^{11}\text{B}$  NMR (160 MHz,  $\text{CD}_3\text{OD}$ ) spectrum of **8**.

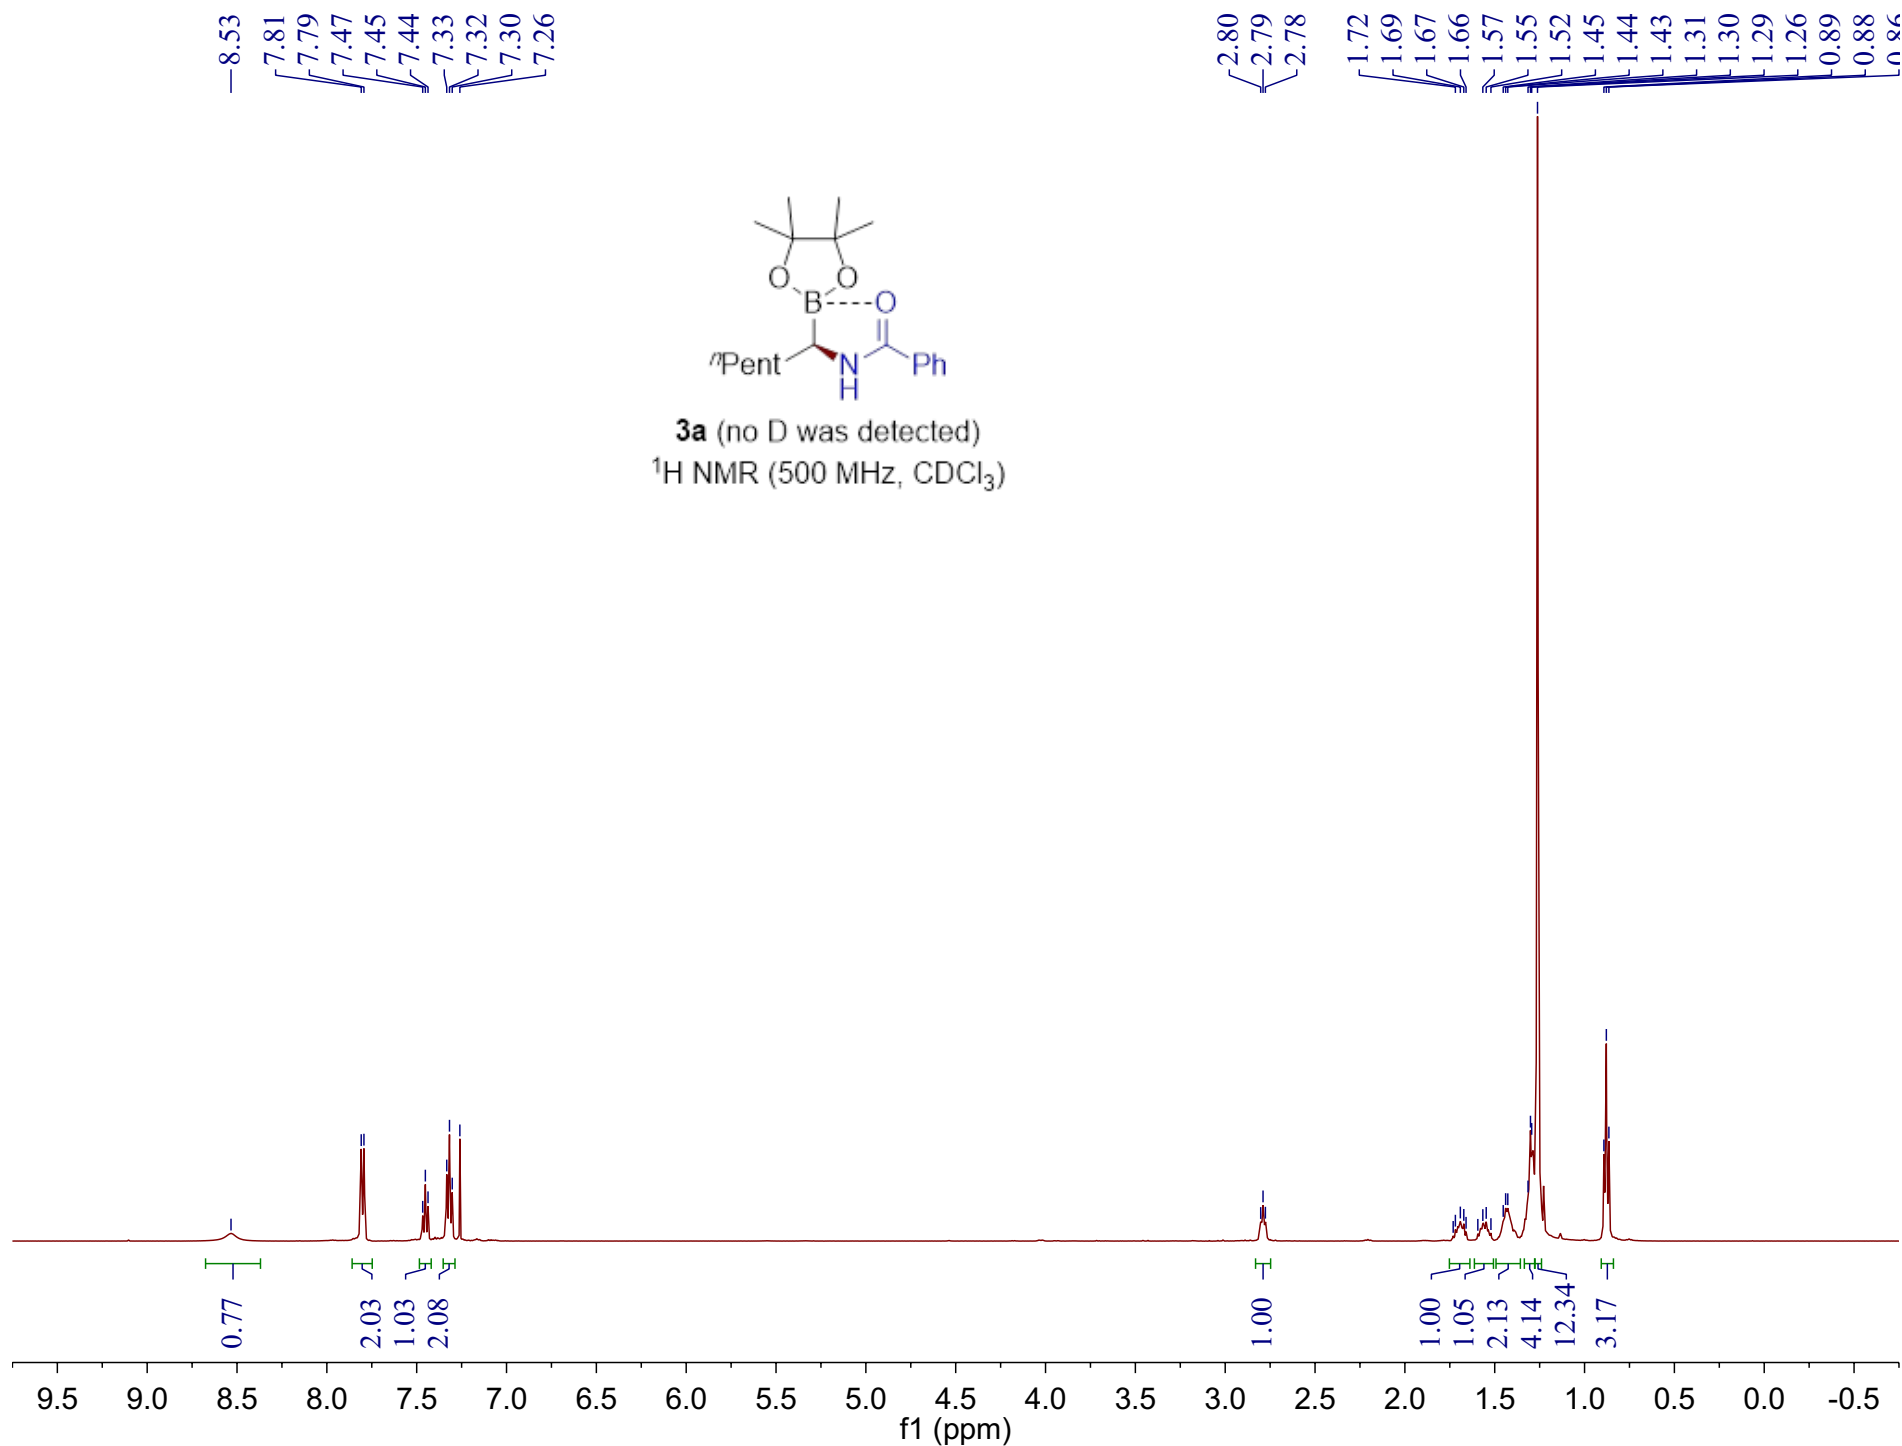

Supplementary Figure 133: <sup>1</sup>H NMR (500 MHz, CDCl<sub>3</sub>) spectrum of **3a** (no D was detected).

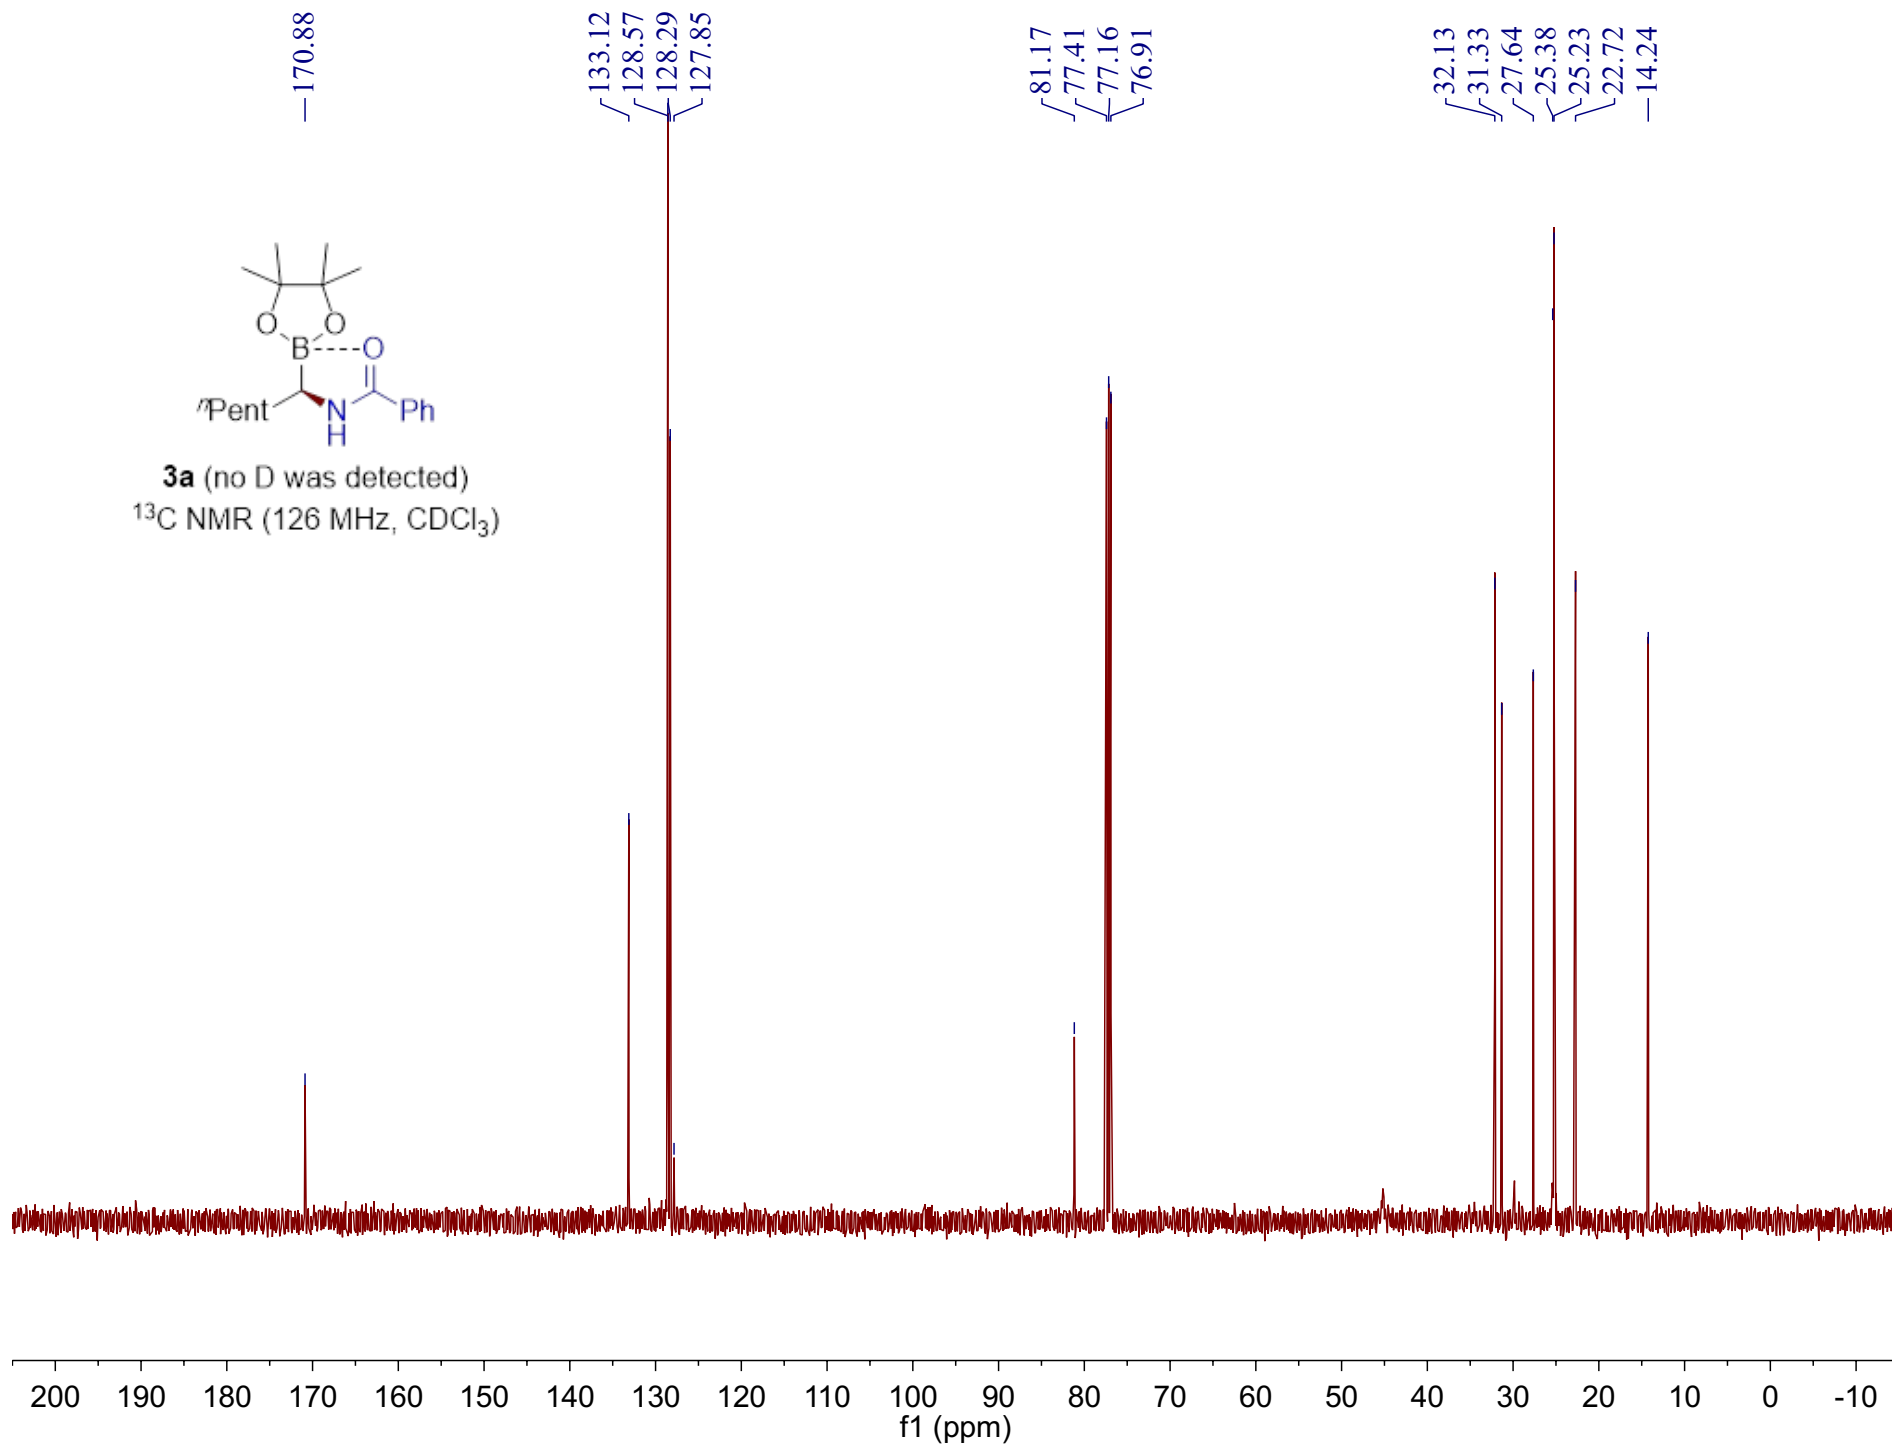

**Supplementary Figure 134:** <sup>13</sup>C NMR (126 MHz, CDCl<sub>3</sub>) spectrum of **3a** (no D was detected).

-17.61

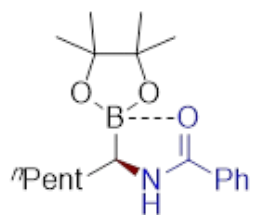

**3a** (no D was detected)  
 $^{11}\text{B}$  NMR (160 MHz,  $\text{CDCl}_3$ )

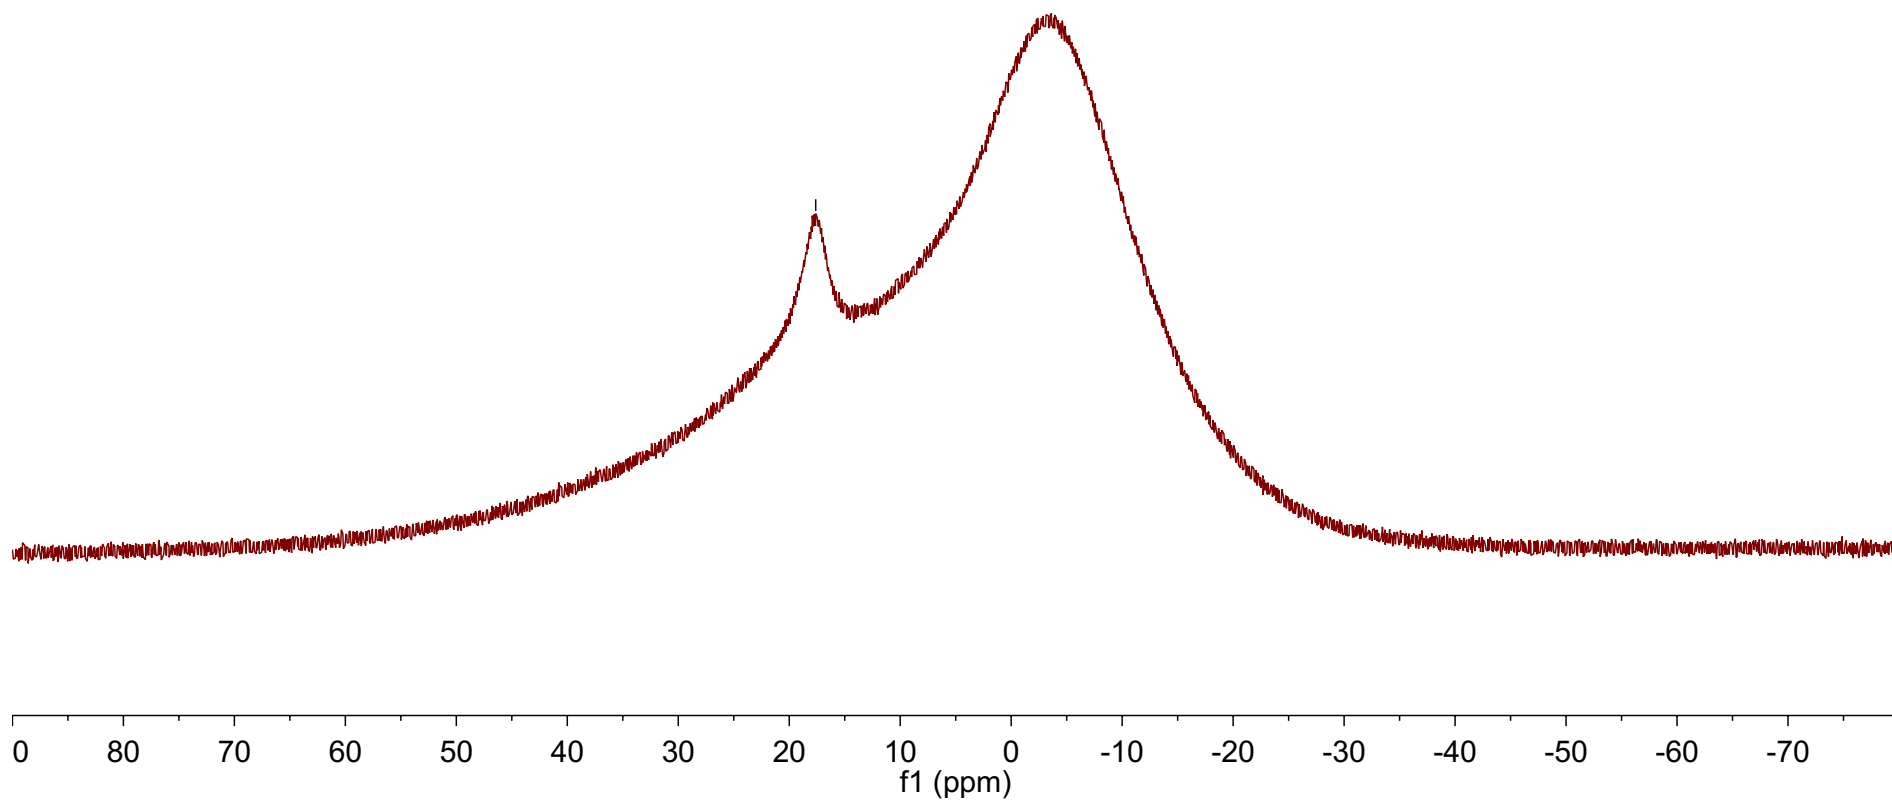

**Supplementary Figure 135:**  $^{11}\text{B}$  NMR (160 MHz,  $\text{CDCl}_3$ ) spectrum of **3a** (no D was detected).

—7.26

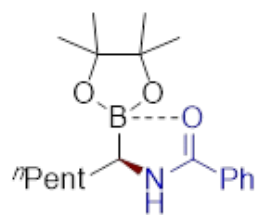

**3a** (no D was detected)  
 $^2\text{H}$  NMR (92 MHz,  $\text{CHCl}_3$ )

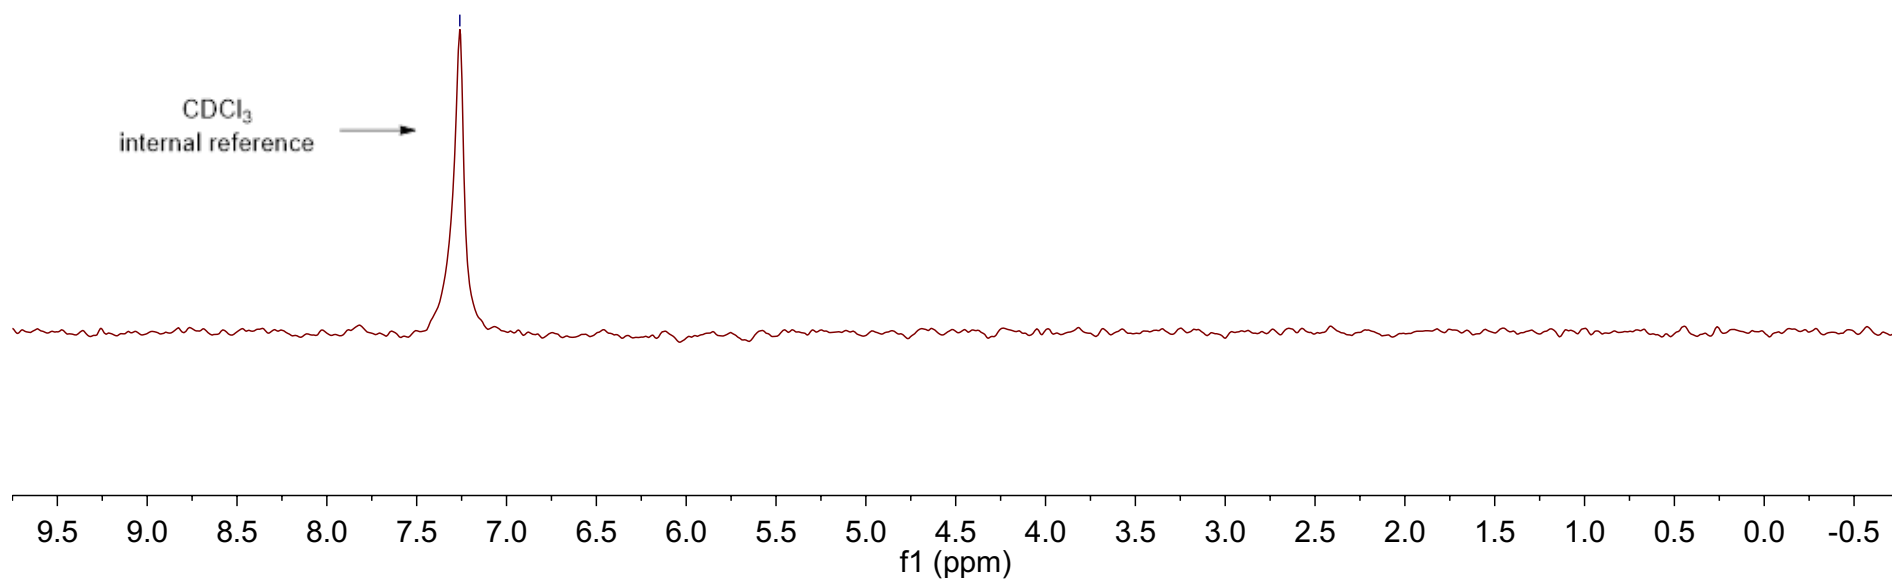

**Supplementary Figure 136:**  $^2\text{H}$  NMR (92 MHz,  $\text{CHCl}_3$ ) spectrum of **3a** (no D was detected).



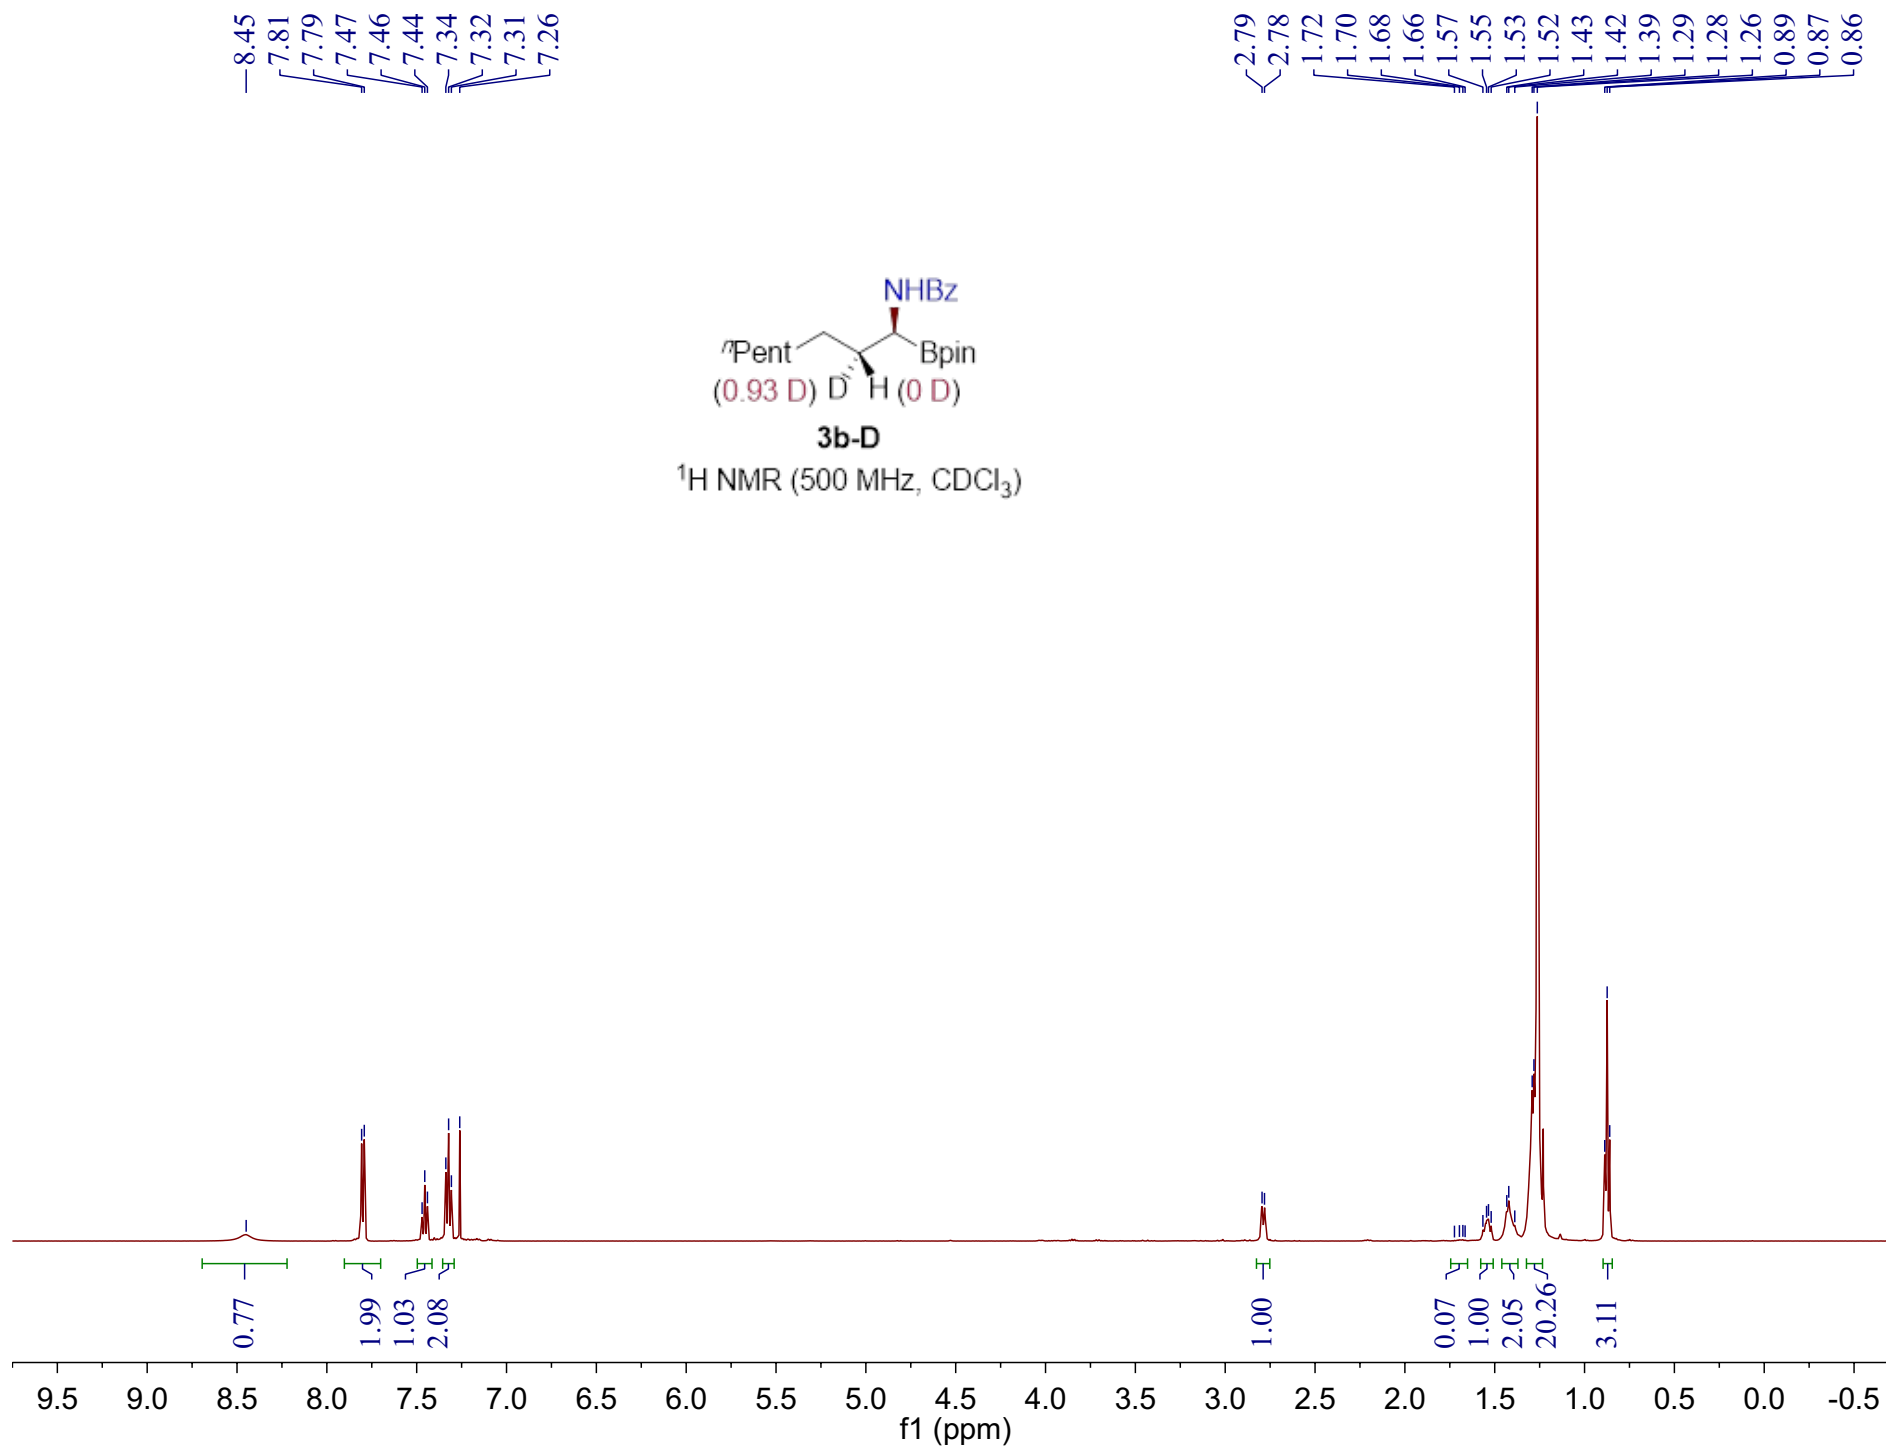

Supplementary Figure 137: <sup>1</sup>H NMR (500 MHz, CDCl<sub>3</sub>) spectrum of **3b-D**.

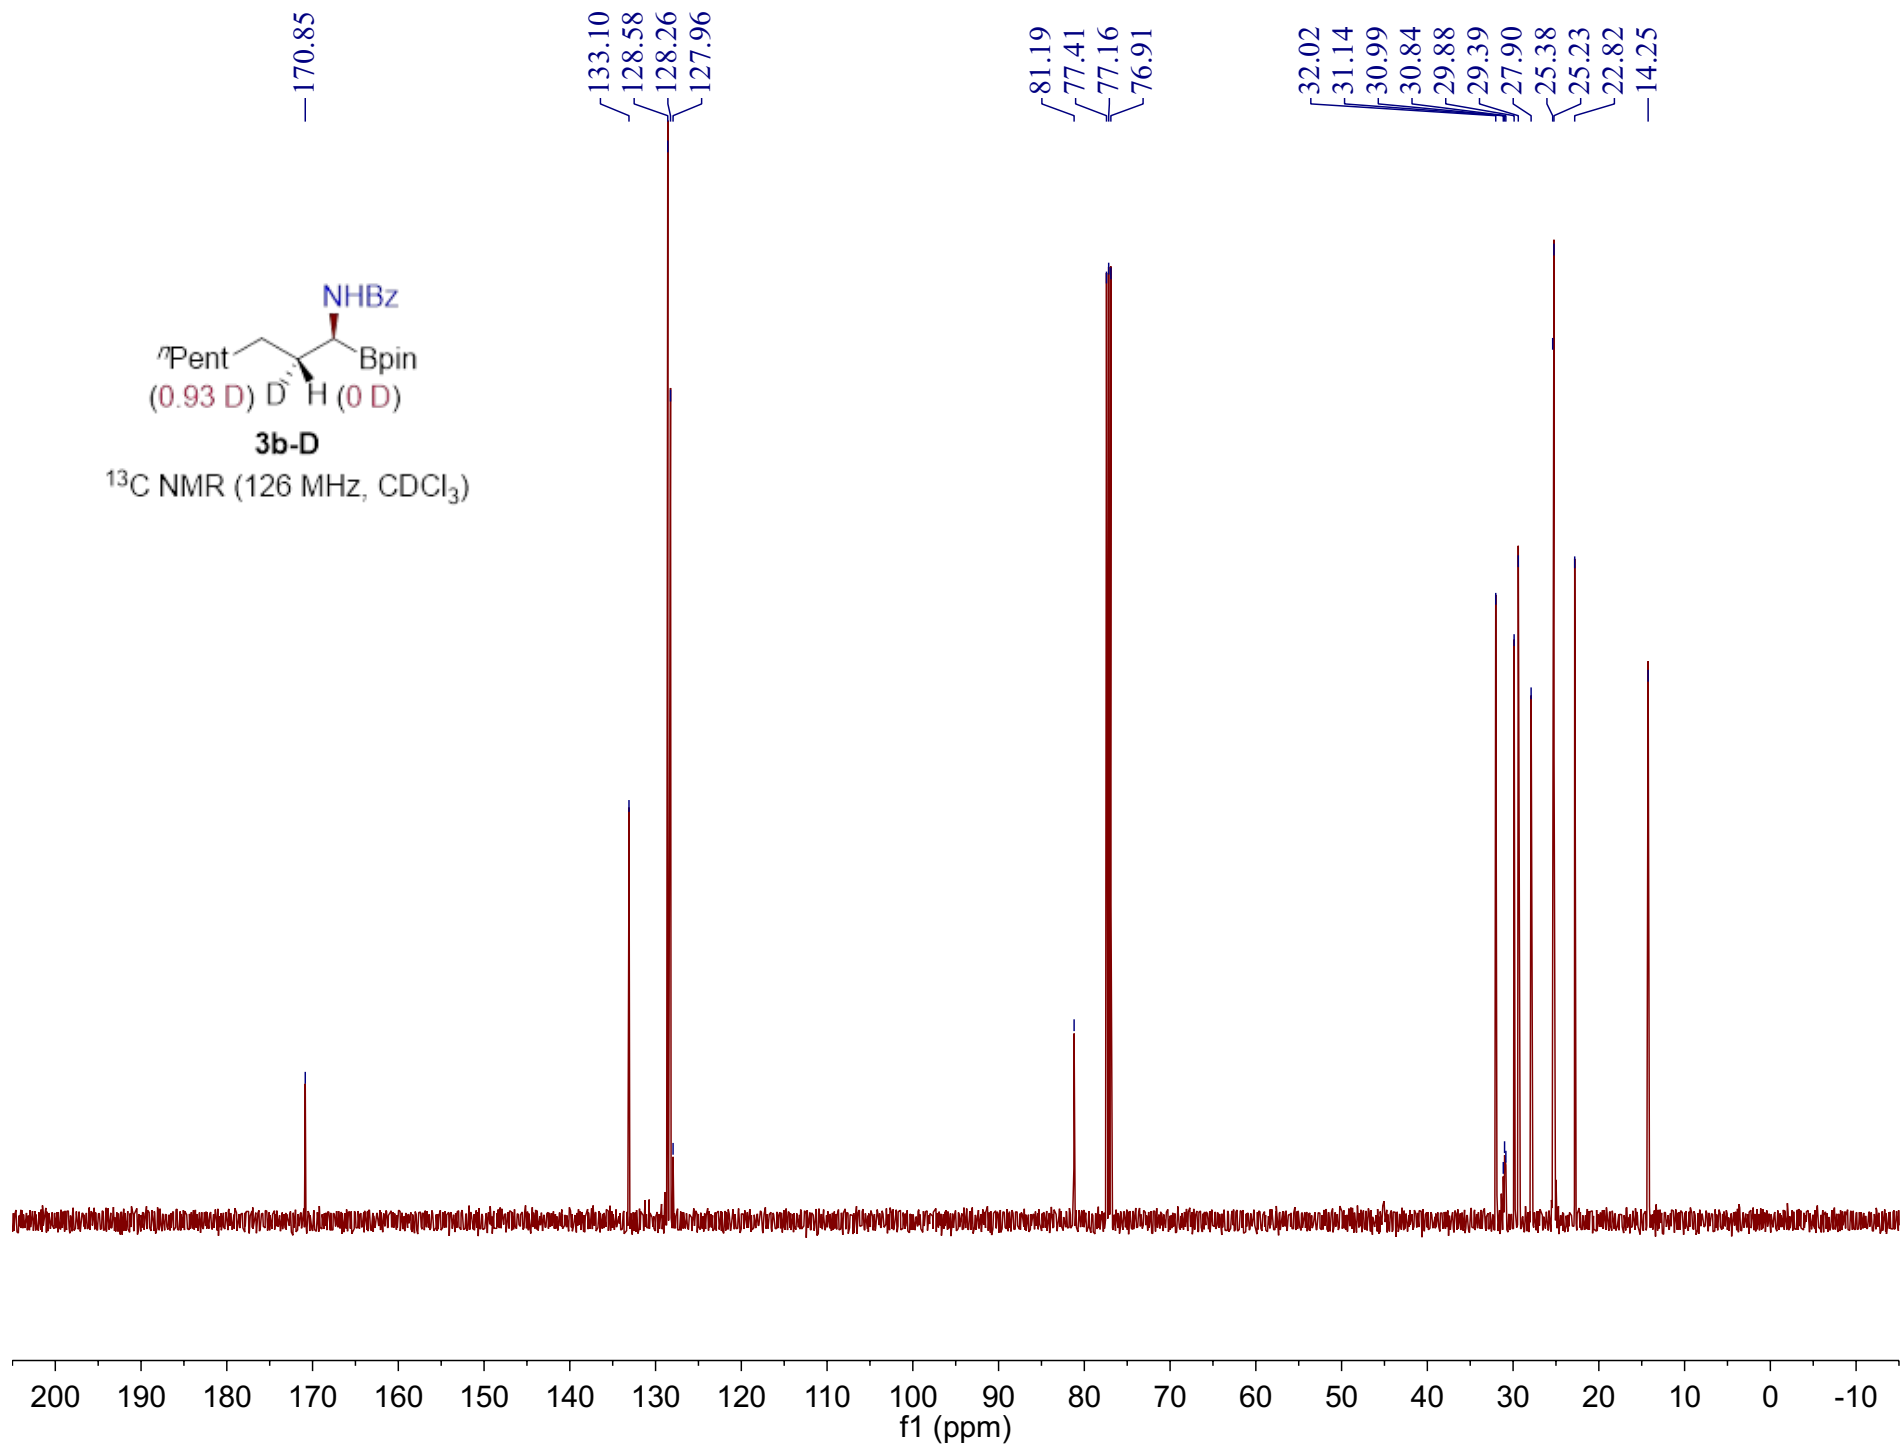

Supplementary Figure 138:  $^{13}\text{C}$  NMR (126 MHz,  $\text{CDCl}_3$ ) spectrum of **3b-D**.

-18.02

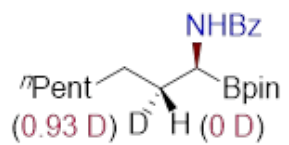

**3b-D**

$^{11}\text{B}$  NMR (160 MHz,  $\text{CDCl}_3$ )

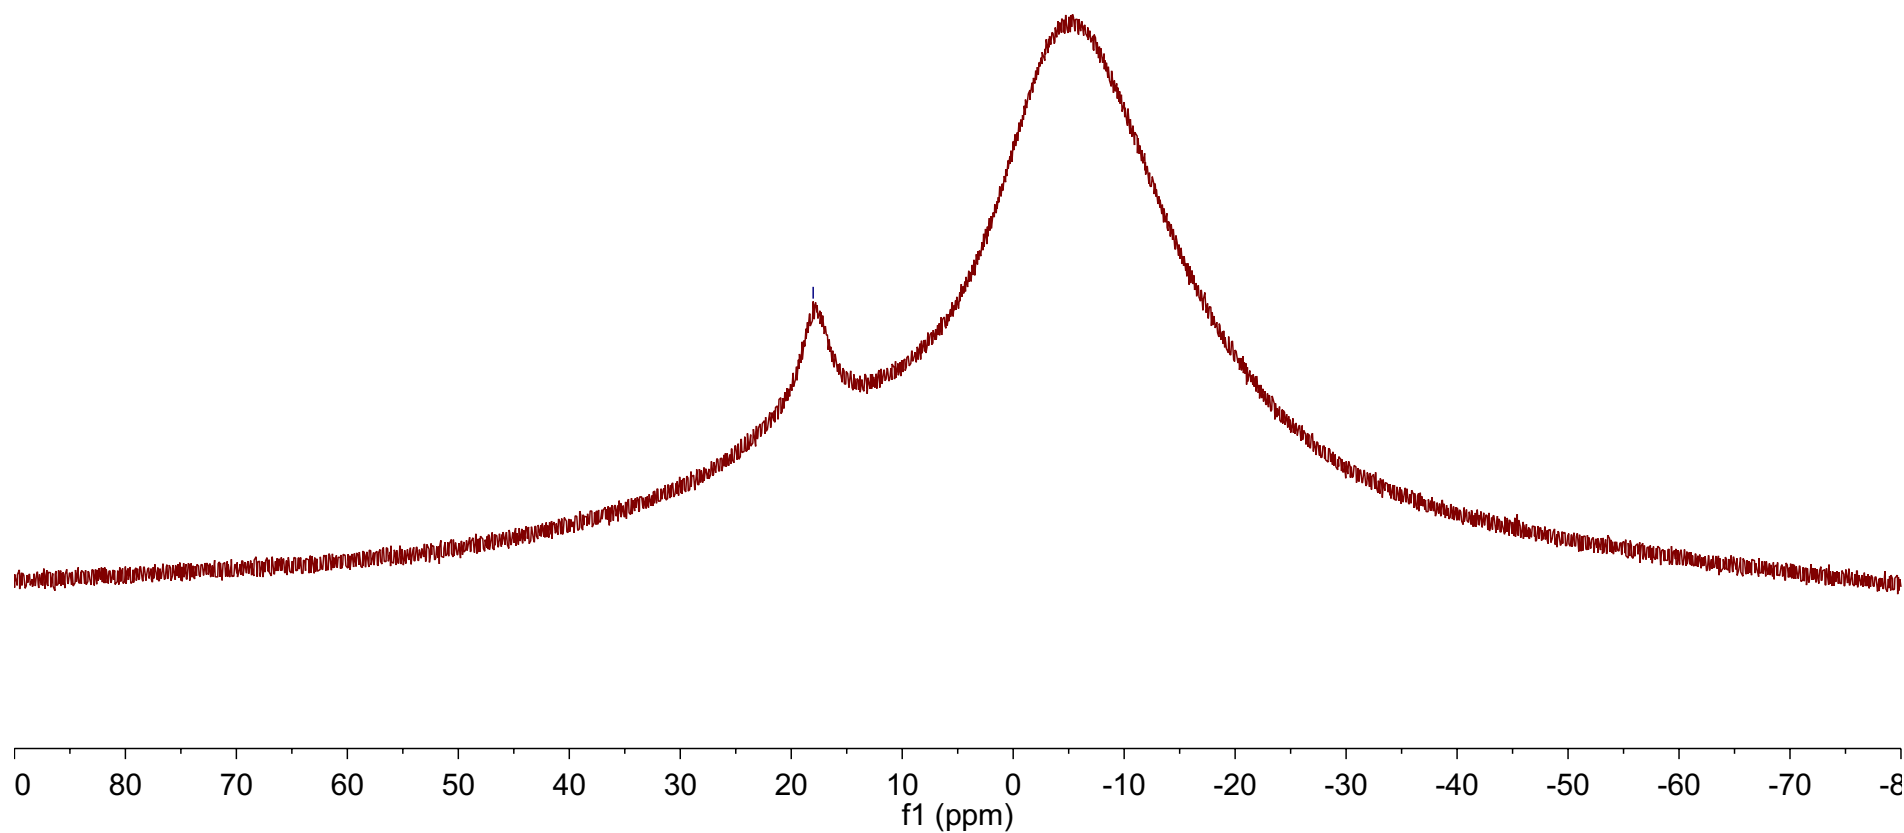

**Supplementary Figure 139:**  $^{11}\text{B}$  NMR (160 MHz,  $\text{CDCl}_3$ ) spectrum of **3b-D**.

—7.26

—1.68

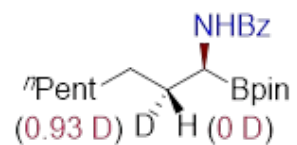

**3b-D**

<sup>2</sup>H NMR (92 MHz, CHCl<sub>3</sub>)

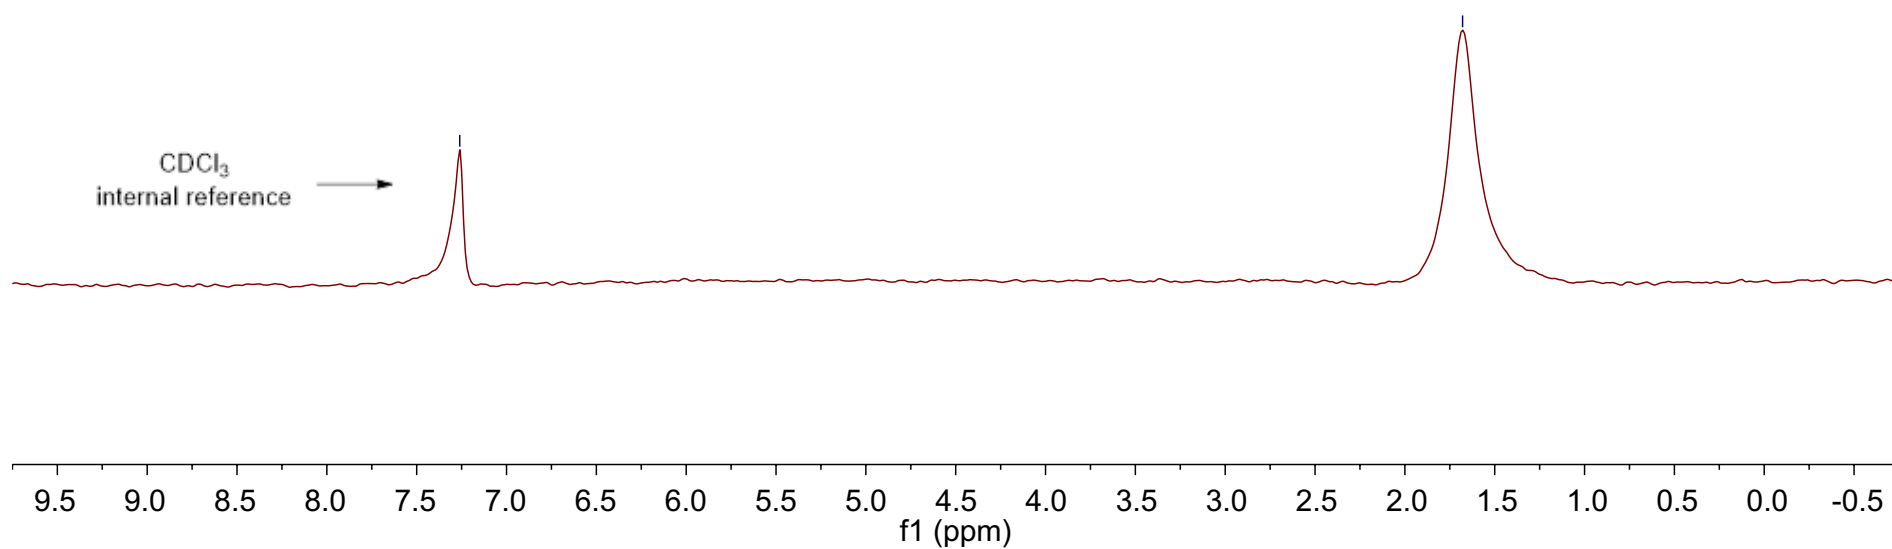

**Supplementary Figure 140:** <sup>2</sup>H NMR (92 MHz, CHCl<sub>3</sub>) spectrum of **3b-D**.

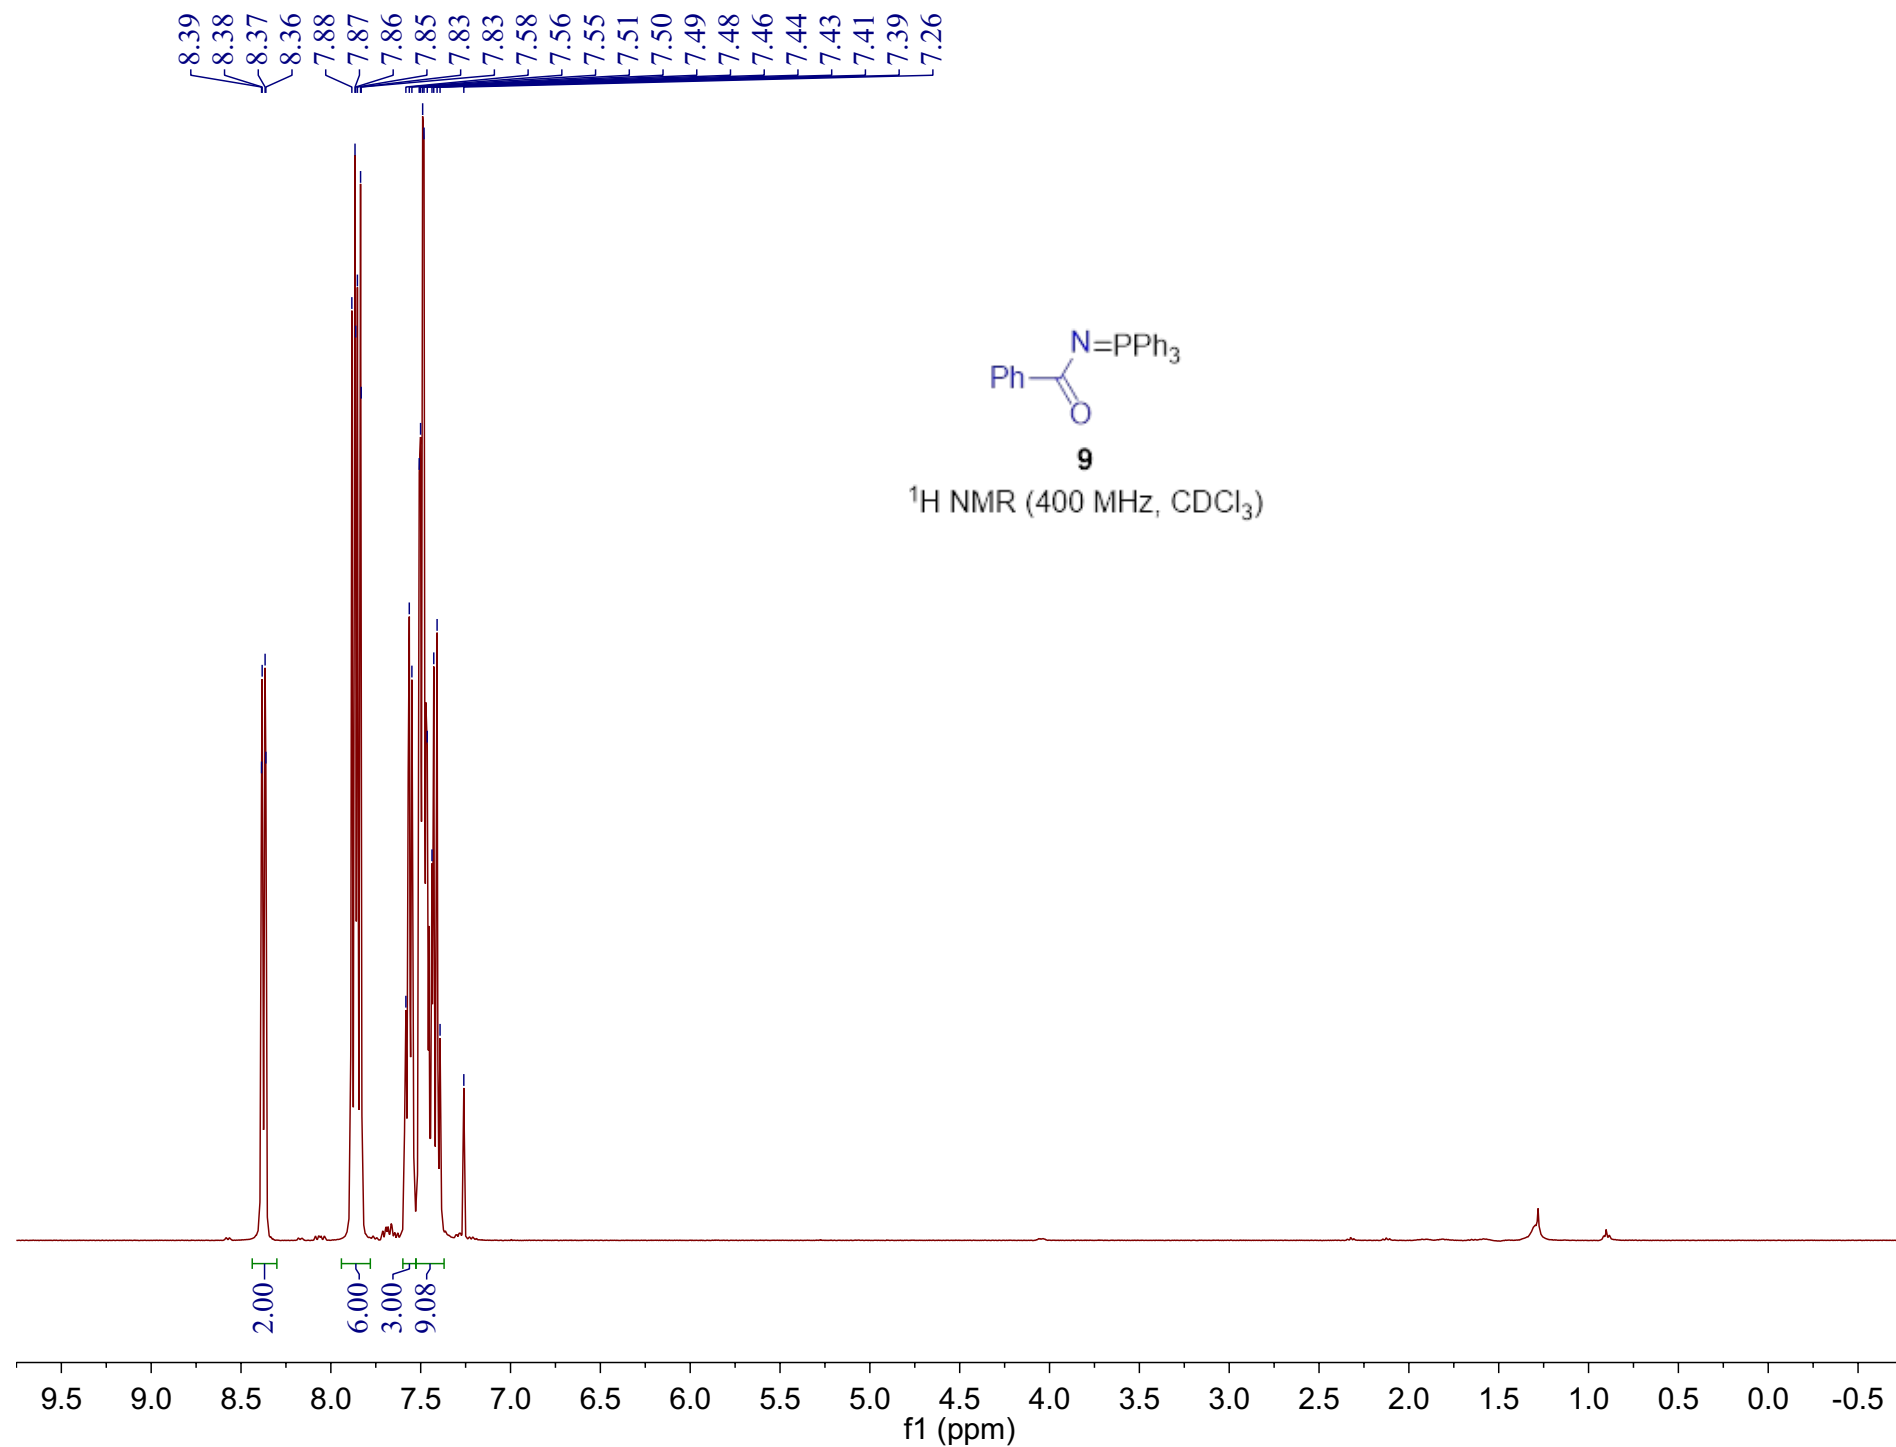

Supplementary Figure 141: <sup>1</sup>H NMR (400 MHz, CDCl<sub>3</sub>) spectrum of **9**.

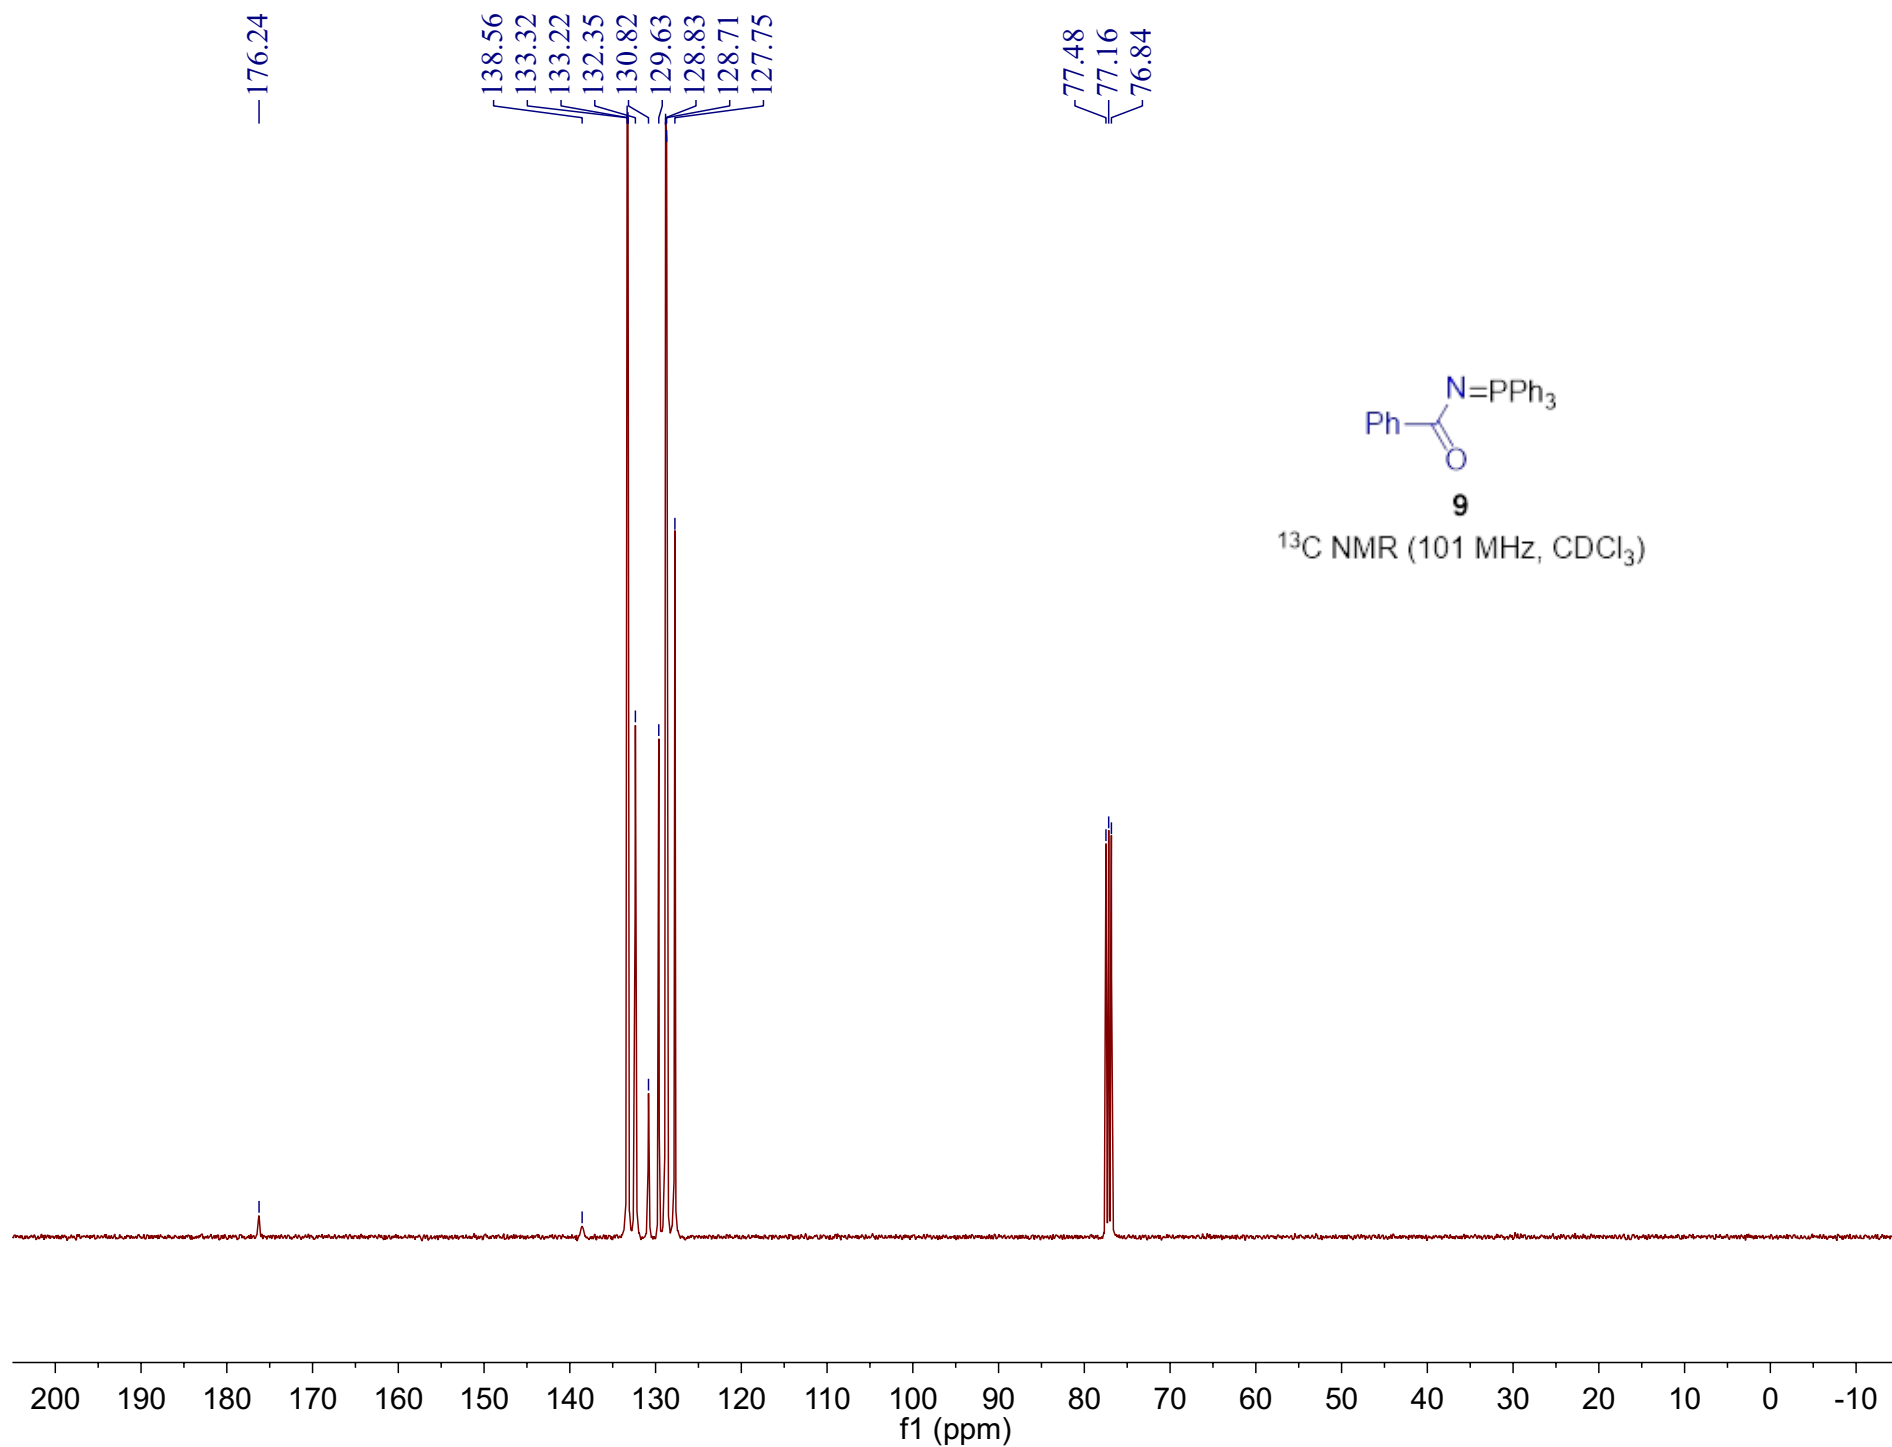

Supplementary Figure 142: <sup>13</sup>C NMR (101 MHz, CDCl<sub>3</sub>) spectrum of **9**.

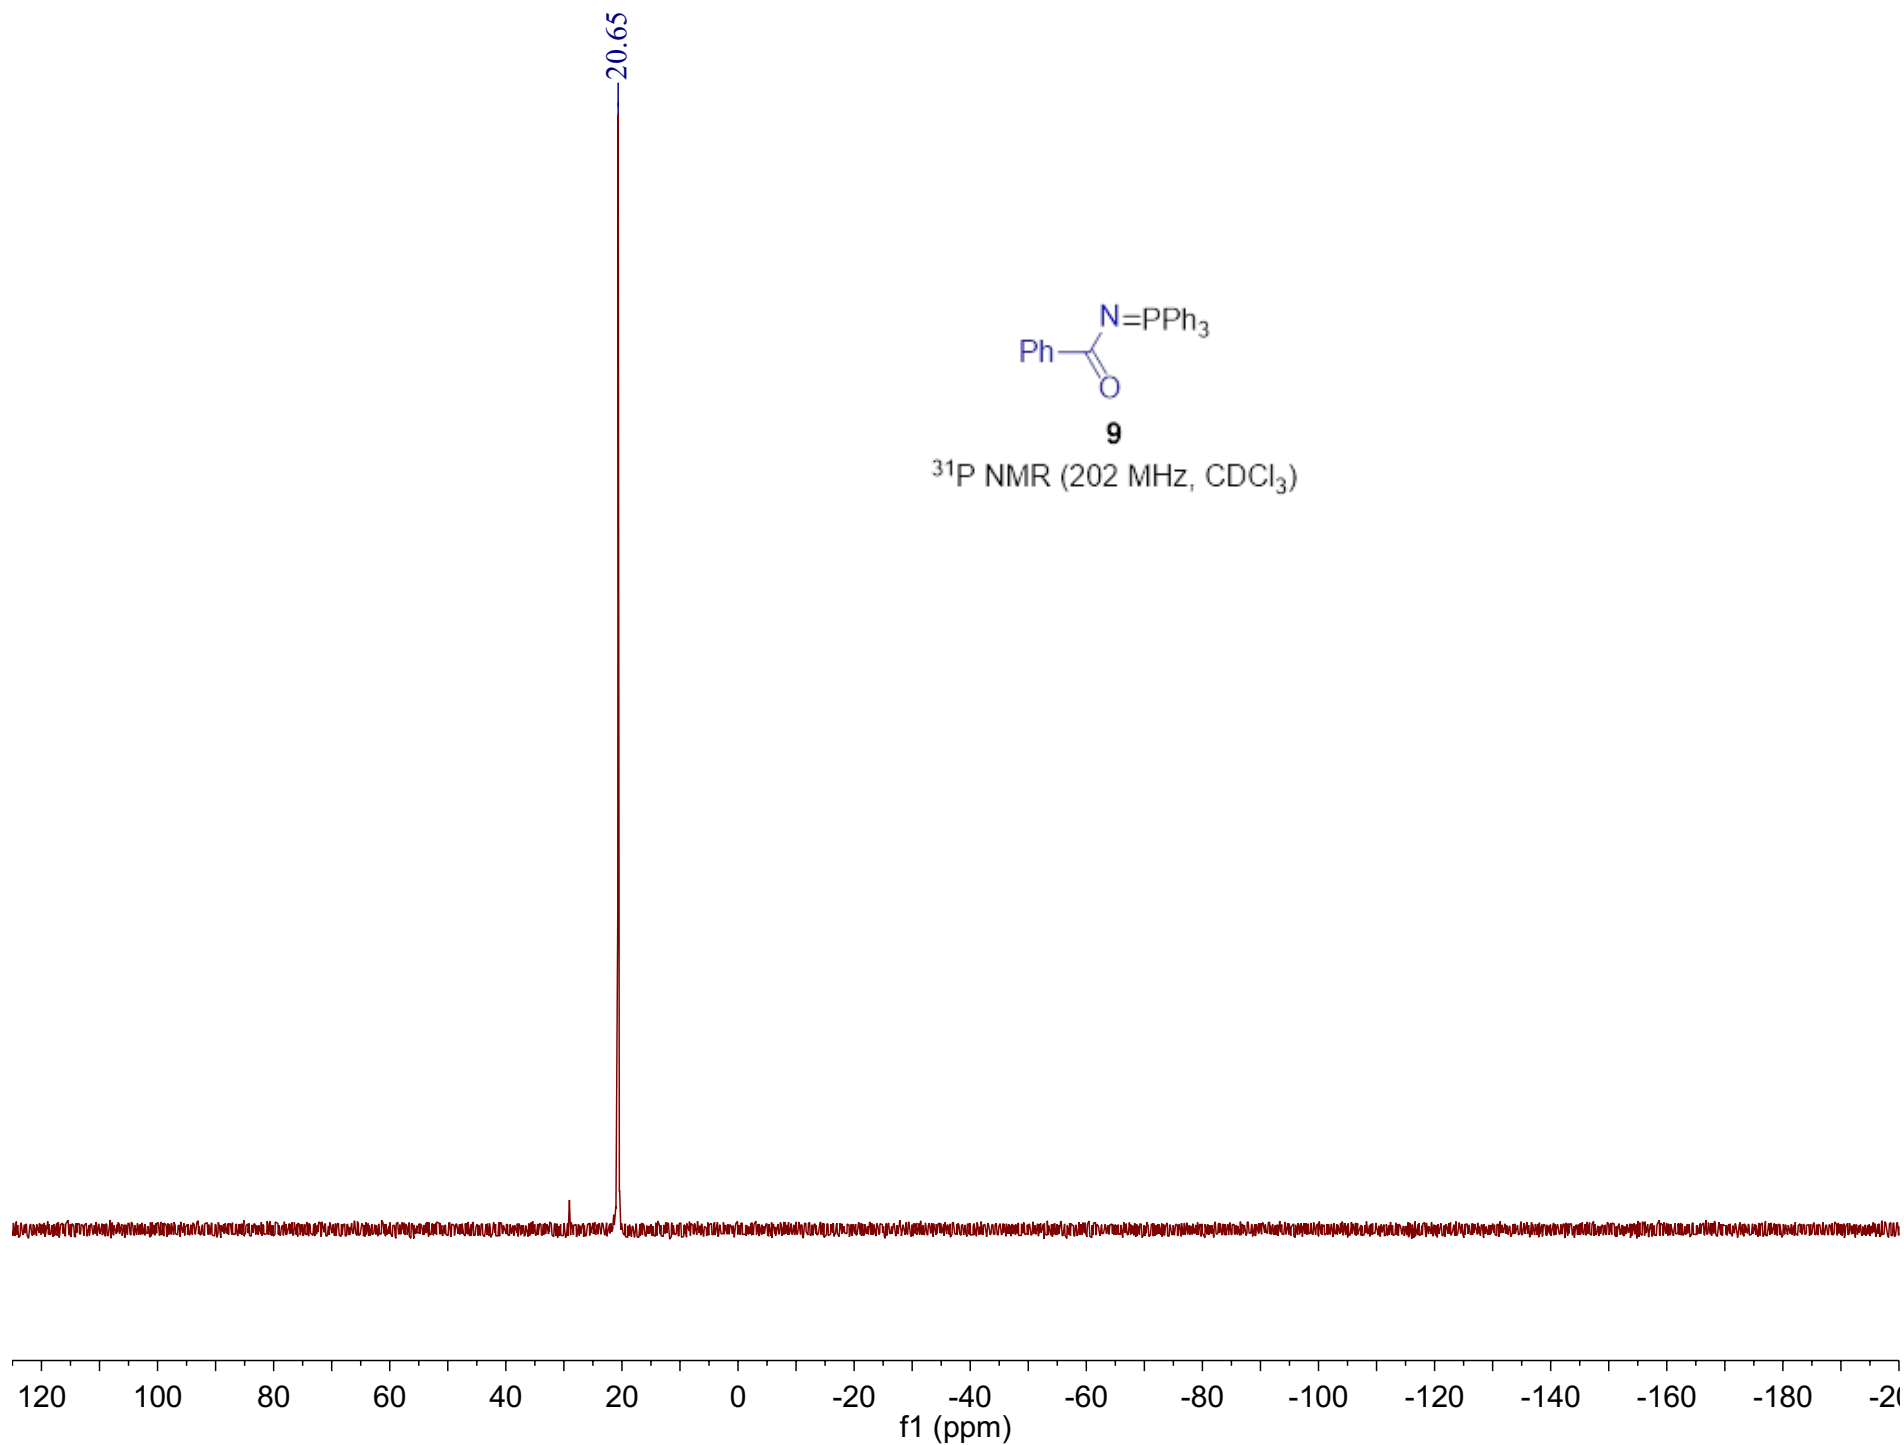

Supplementary Figure 143:  $^{31}\text{P}$  NMR (202 MHz,  $\text{CDCl}_3$ ) spectrum of **9**.

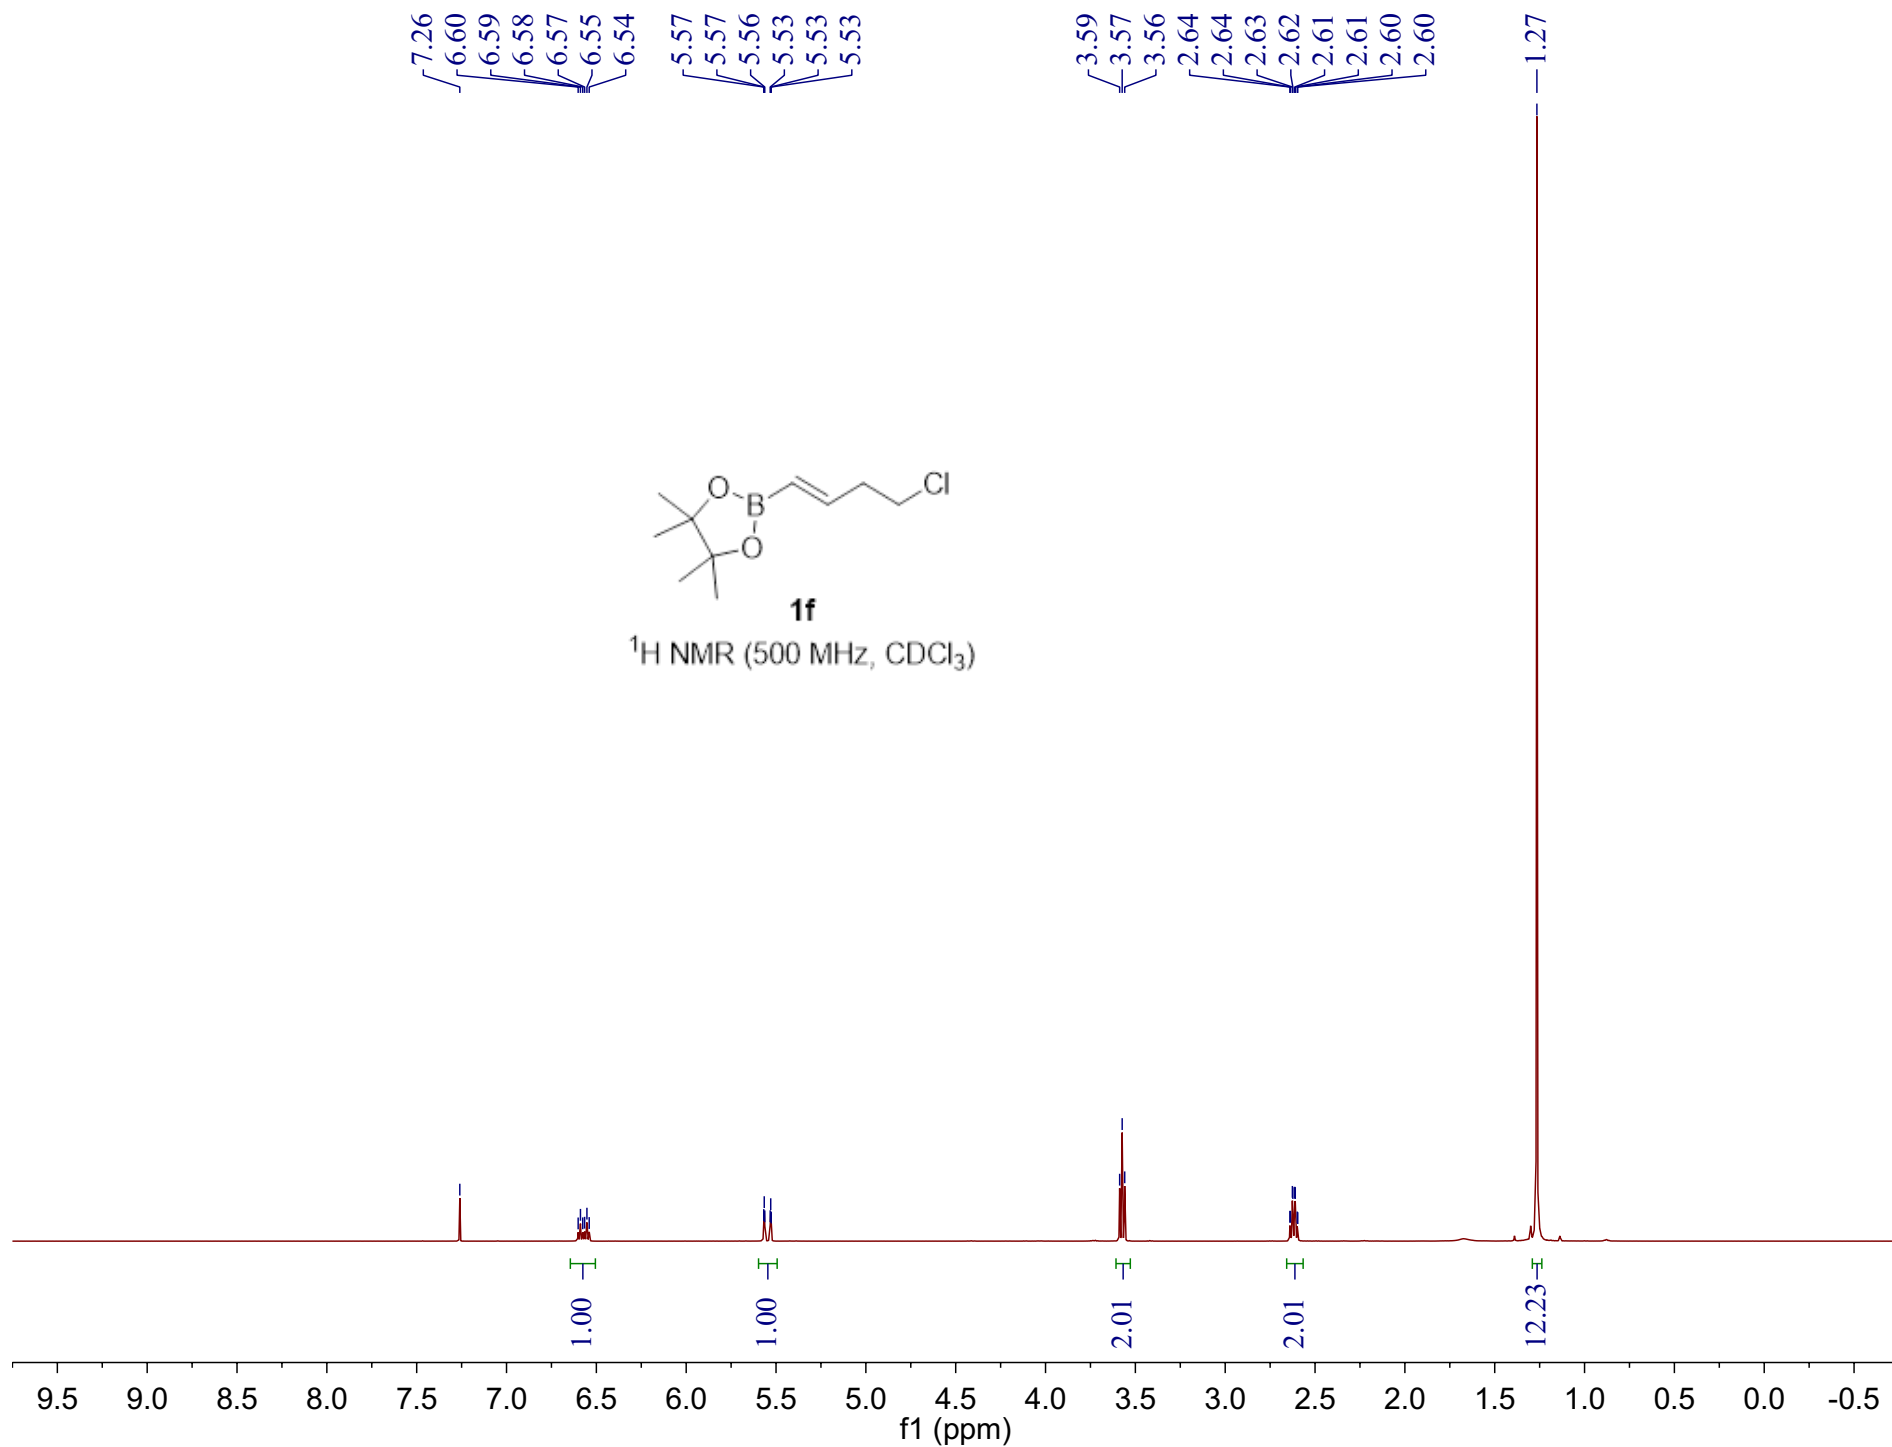

Supplementary Figure 144: <sup>1</sup>H NMR (500 MHz, CDCl<sub>3</sub>) spectrum of **1f**.



—148.99

83.41  
77.41  
77.16  
76.91

—43.02  
—38.79

—24.92

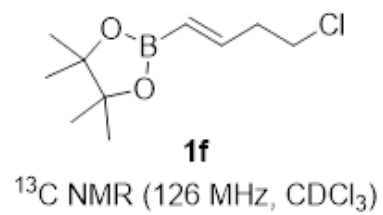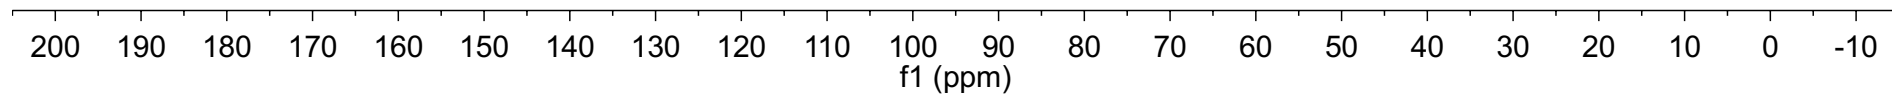

Supplementary Figure 145: <sup>13</sup>C NMR (126 MHz, CDCl<sub>3</sub>) spectrum of **1f**.

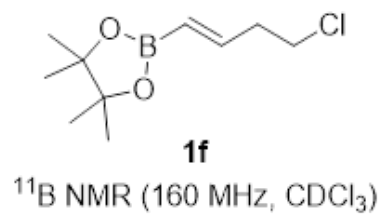

-29.71

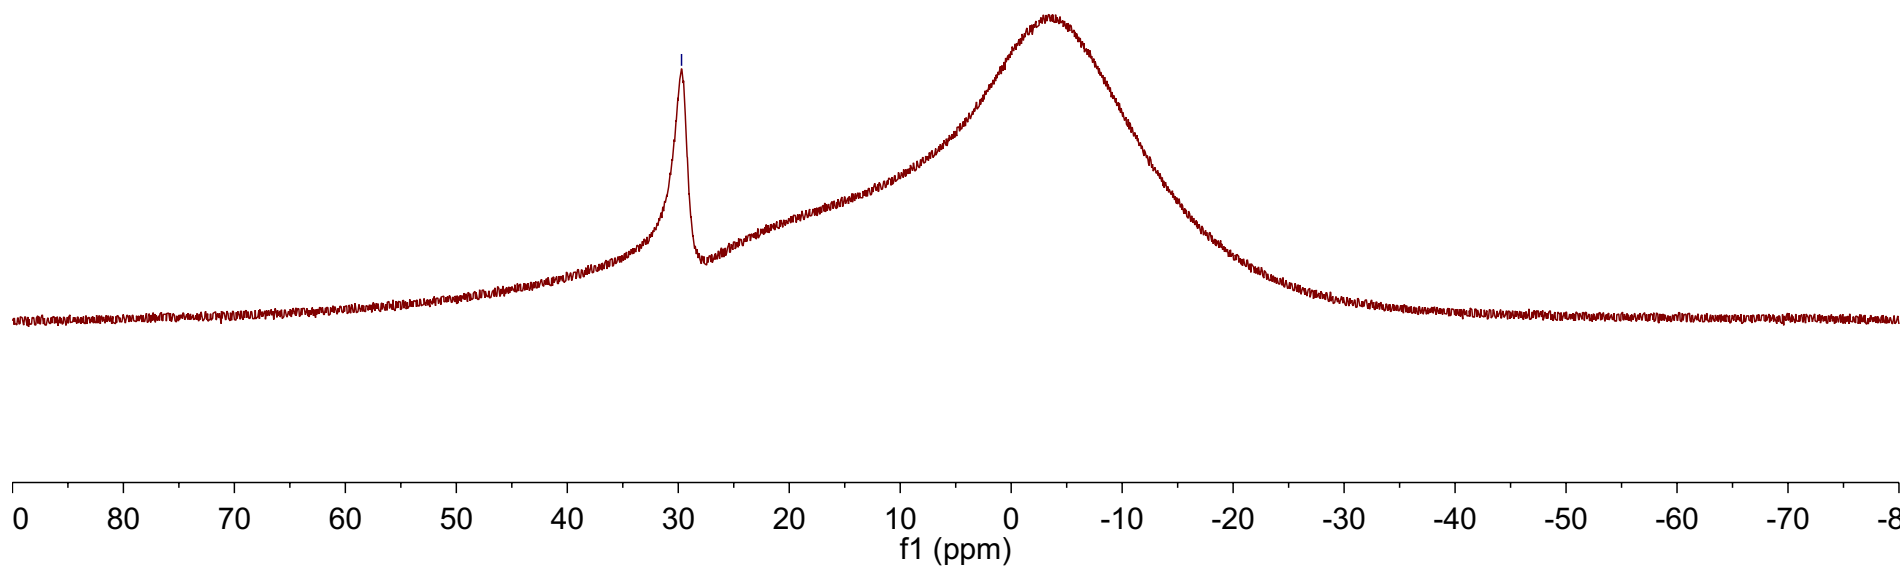

Supplementary Figure 146: <sup>11</sup>B NMR (160 MHz, CDCl<sub>3</sub>) spectrum of **1f**.

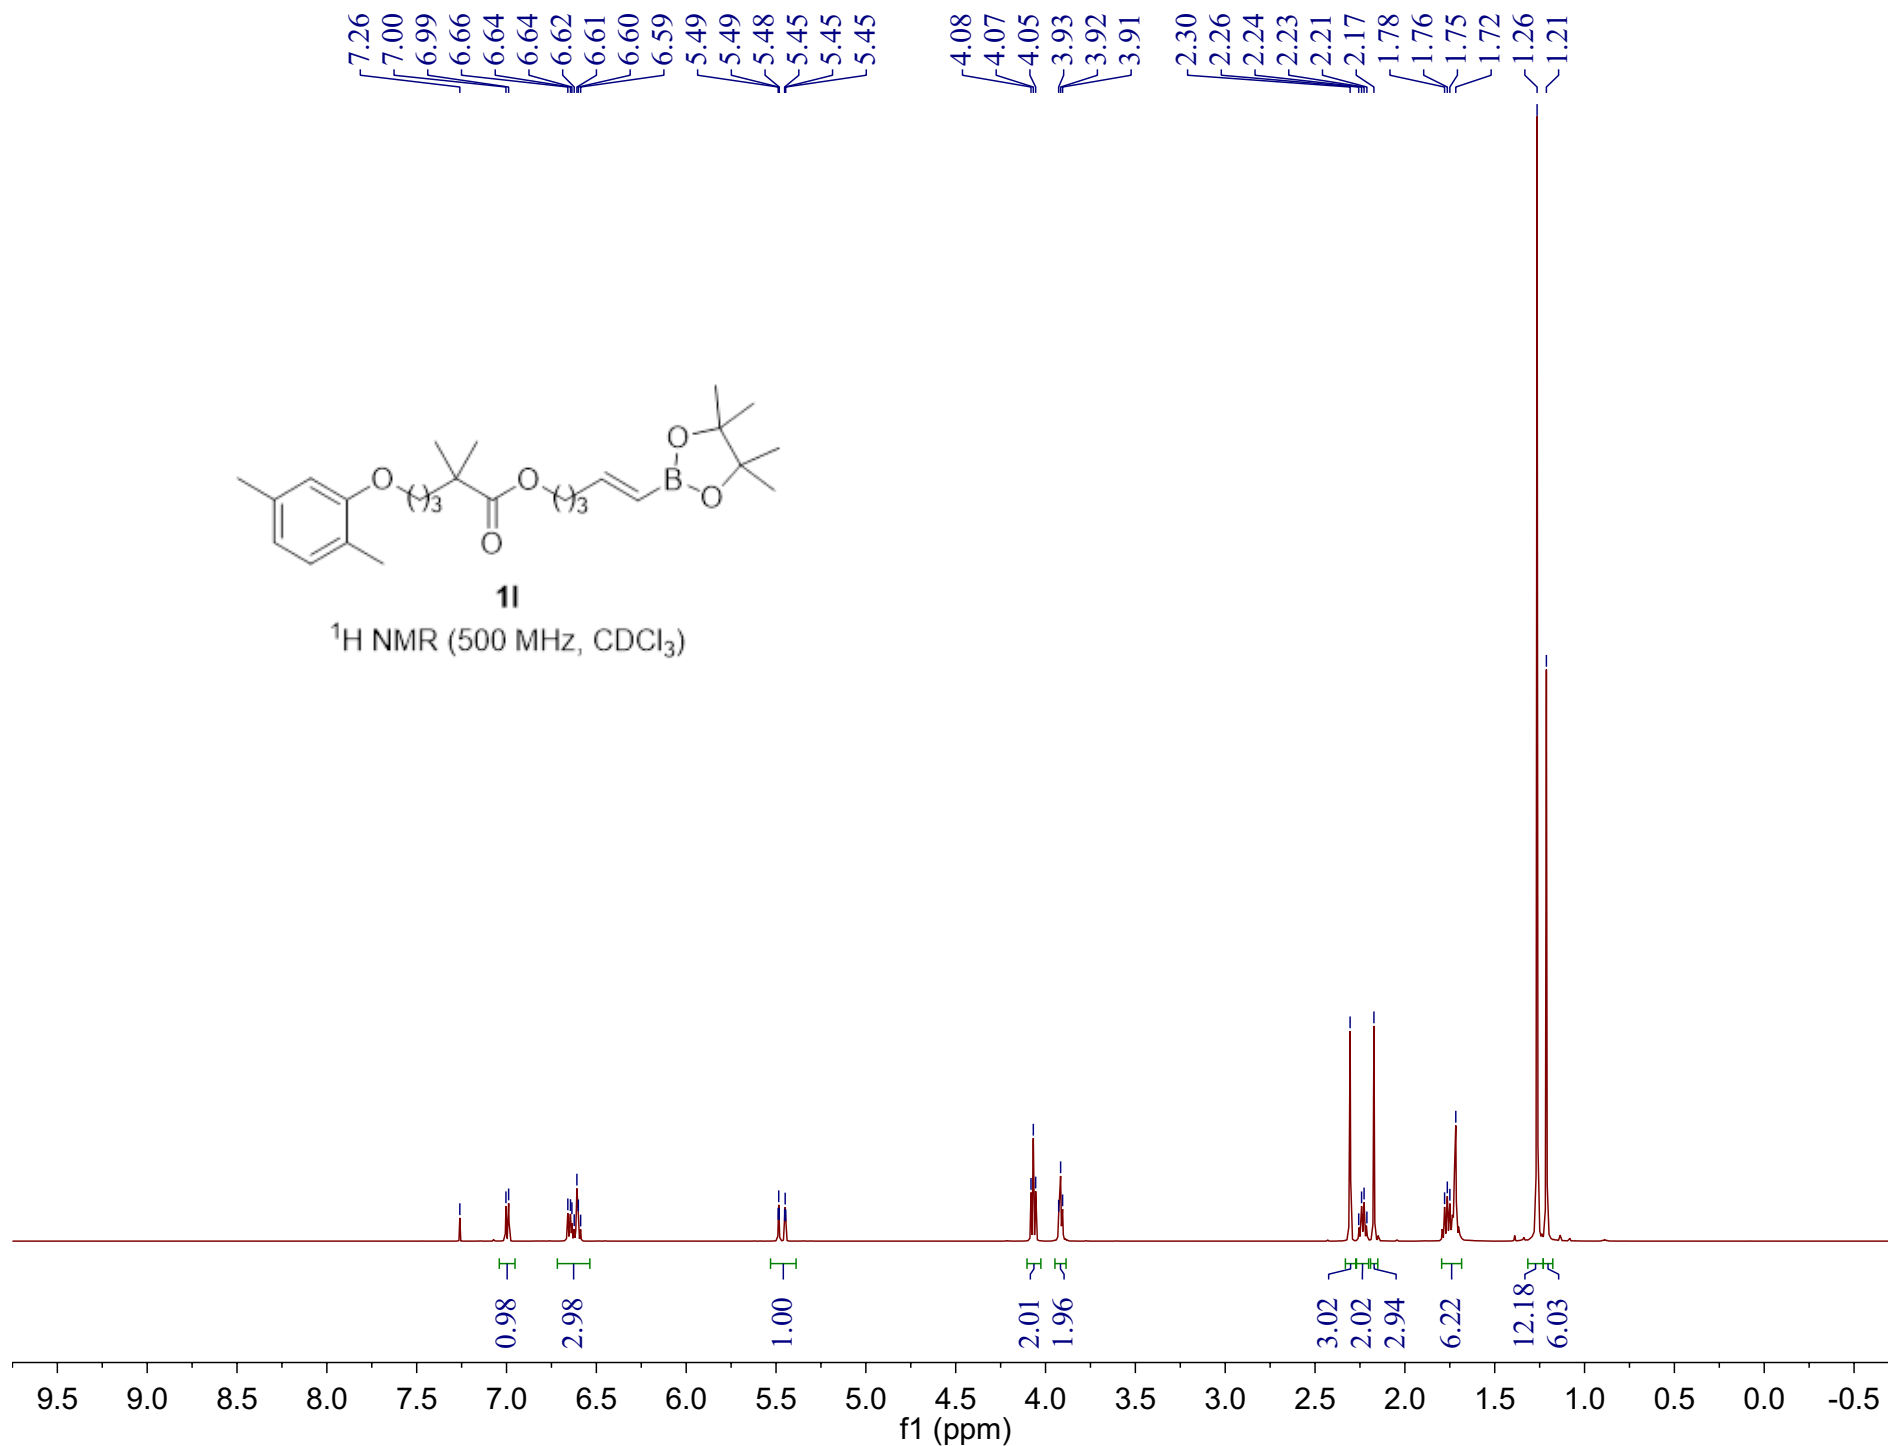

Supplementary Figure 147: <sup>1</sup>H NMR (500 MHz, CDCl<sub>3</sub>) spectrum of **11**.

—177.88  
—157.06  
—152.89  
—136.54  
—130.38  
—123.71  
—120.77  
—112.06

83.22  
77.41  
77.16  
76.91  
—68.05  
—63.91

—42.21  
—37.25  
—32.21  
—27.38  
—25.31  
—24.91  
—21.53  
—15.90

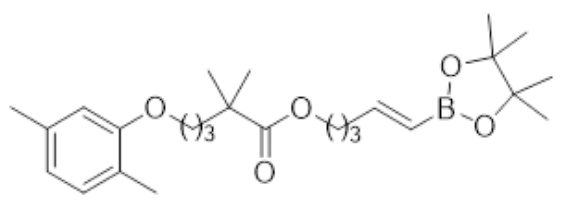

<sup>13</sup>C NMR (126 MHz, CDCl<sub>3</sub>)

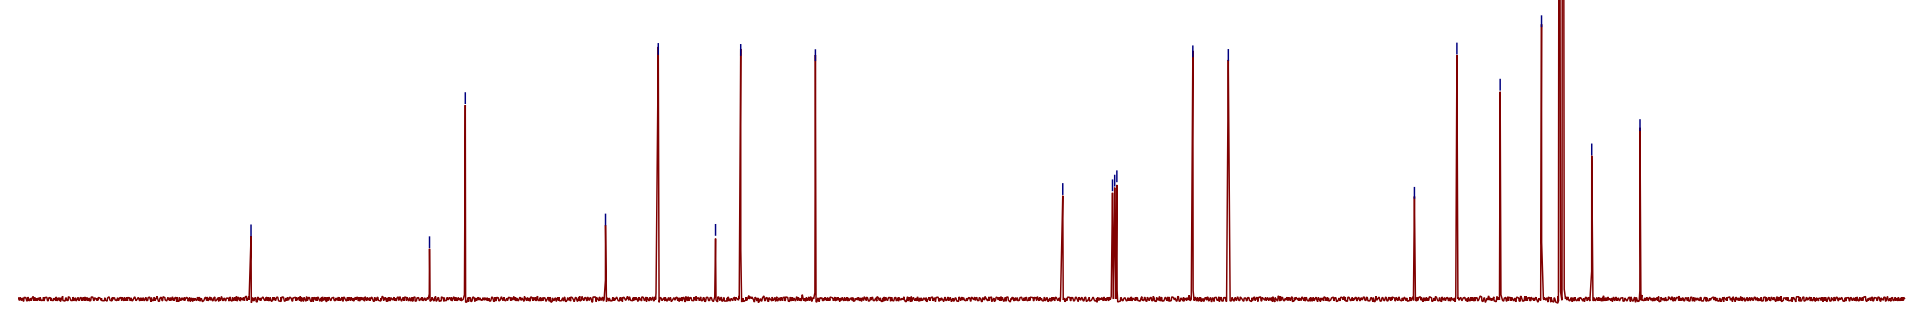

Supplementary Figure 148: <sup>13</sup>C NMR (126 MHz, CDCl<sub>3</sub>) spectrum of **11**.

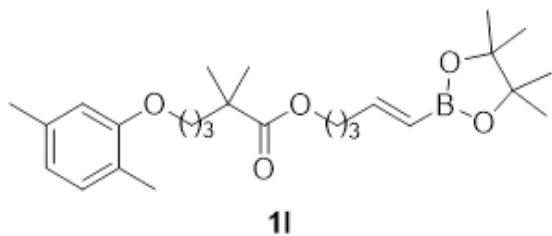

$^{11}\text{B}$  NMR (160 MHz,  $\text{CDCl}_3$ )

-29.89

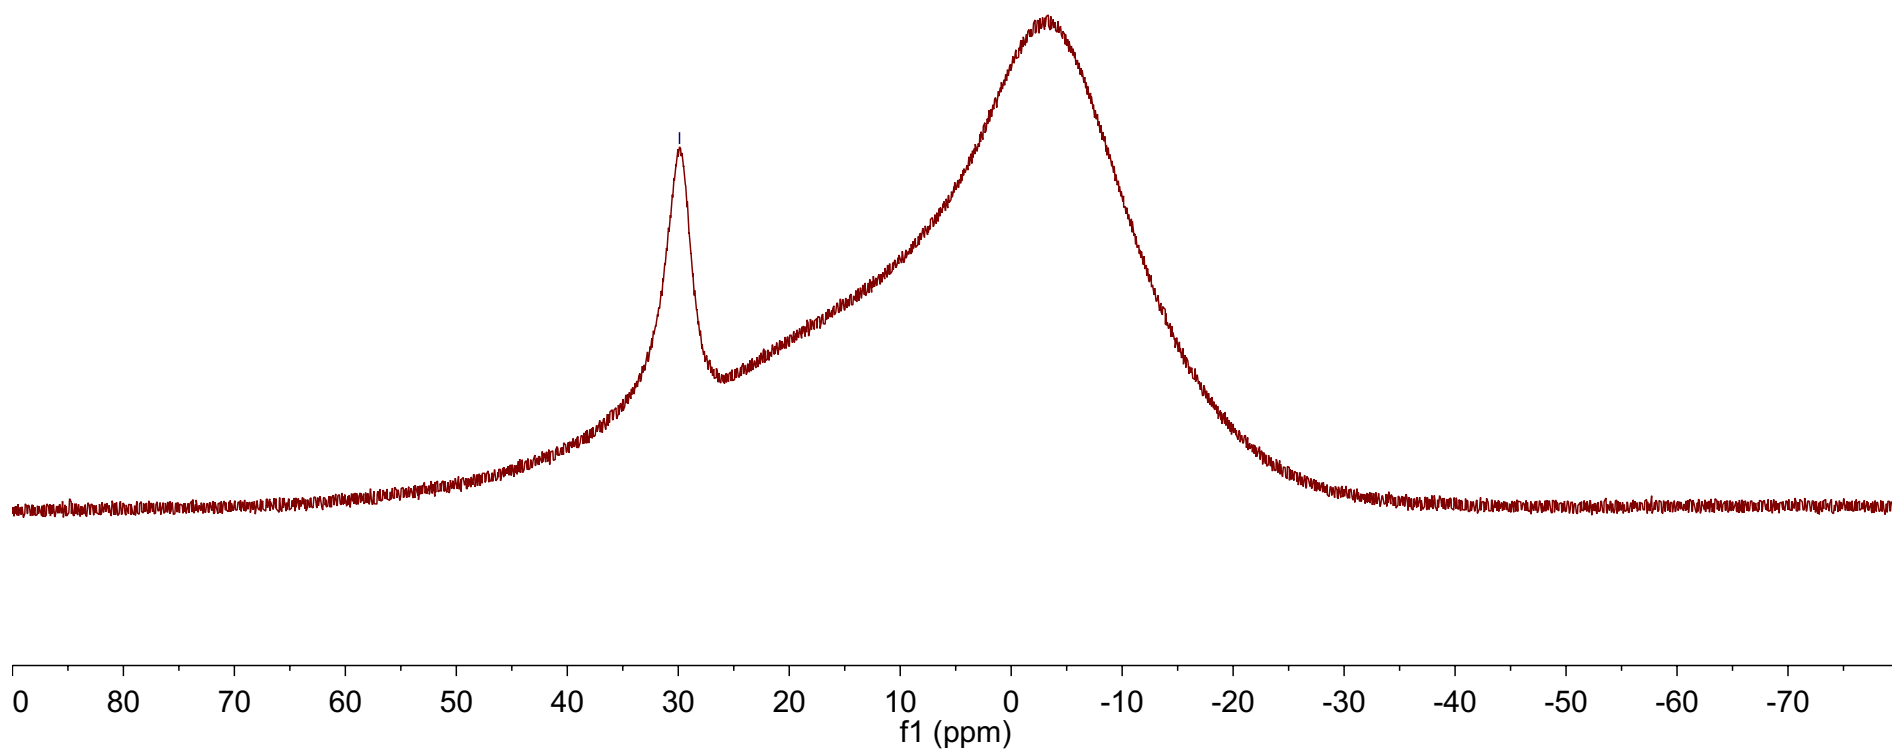

Supplementary Figure 149:  $^{11}\text{B}$  NMR (160 MHz,  $\text{CDCl}_3$ ) spectrum of **11**.

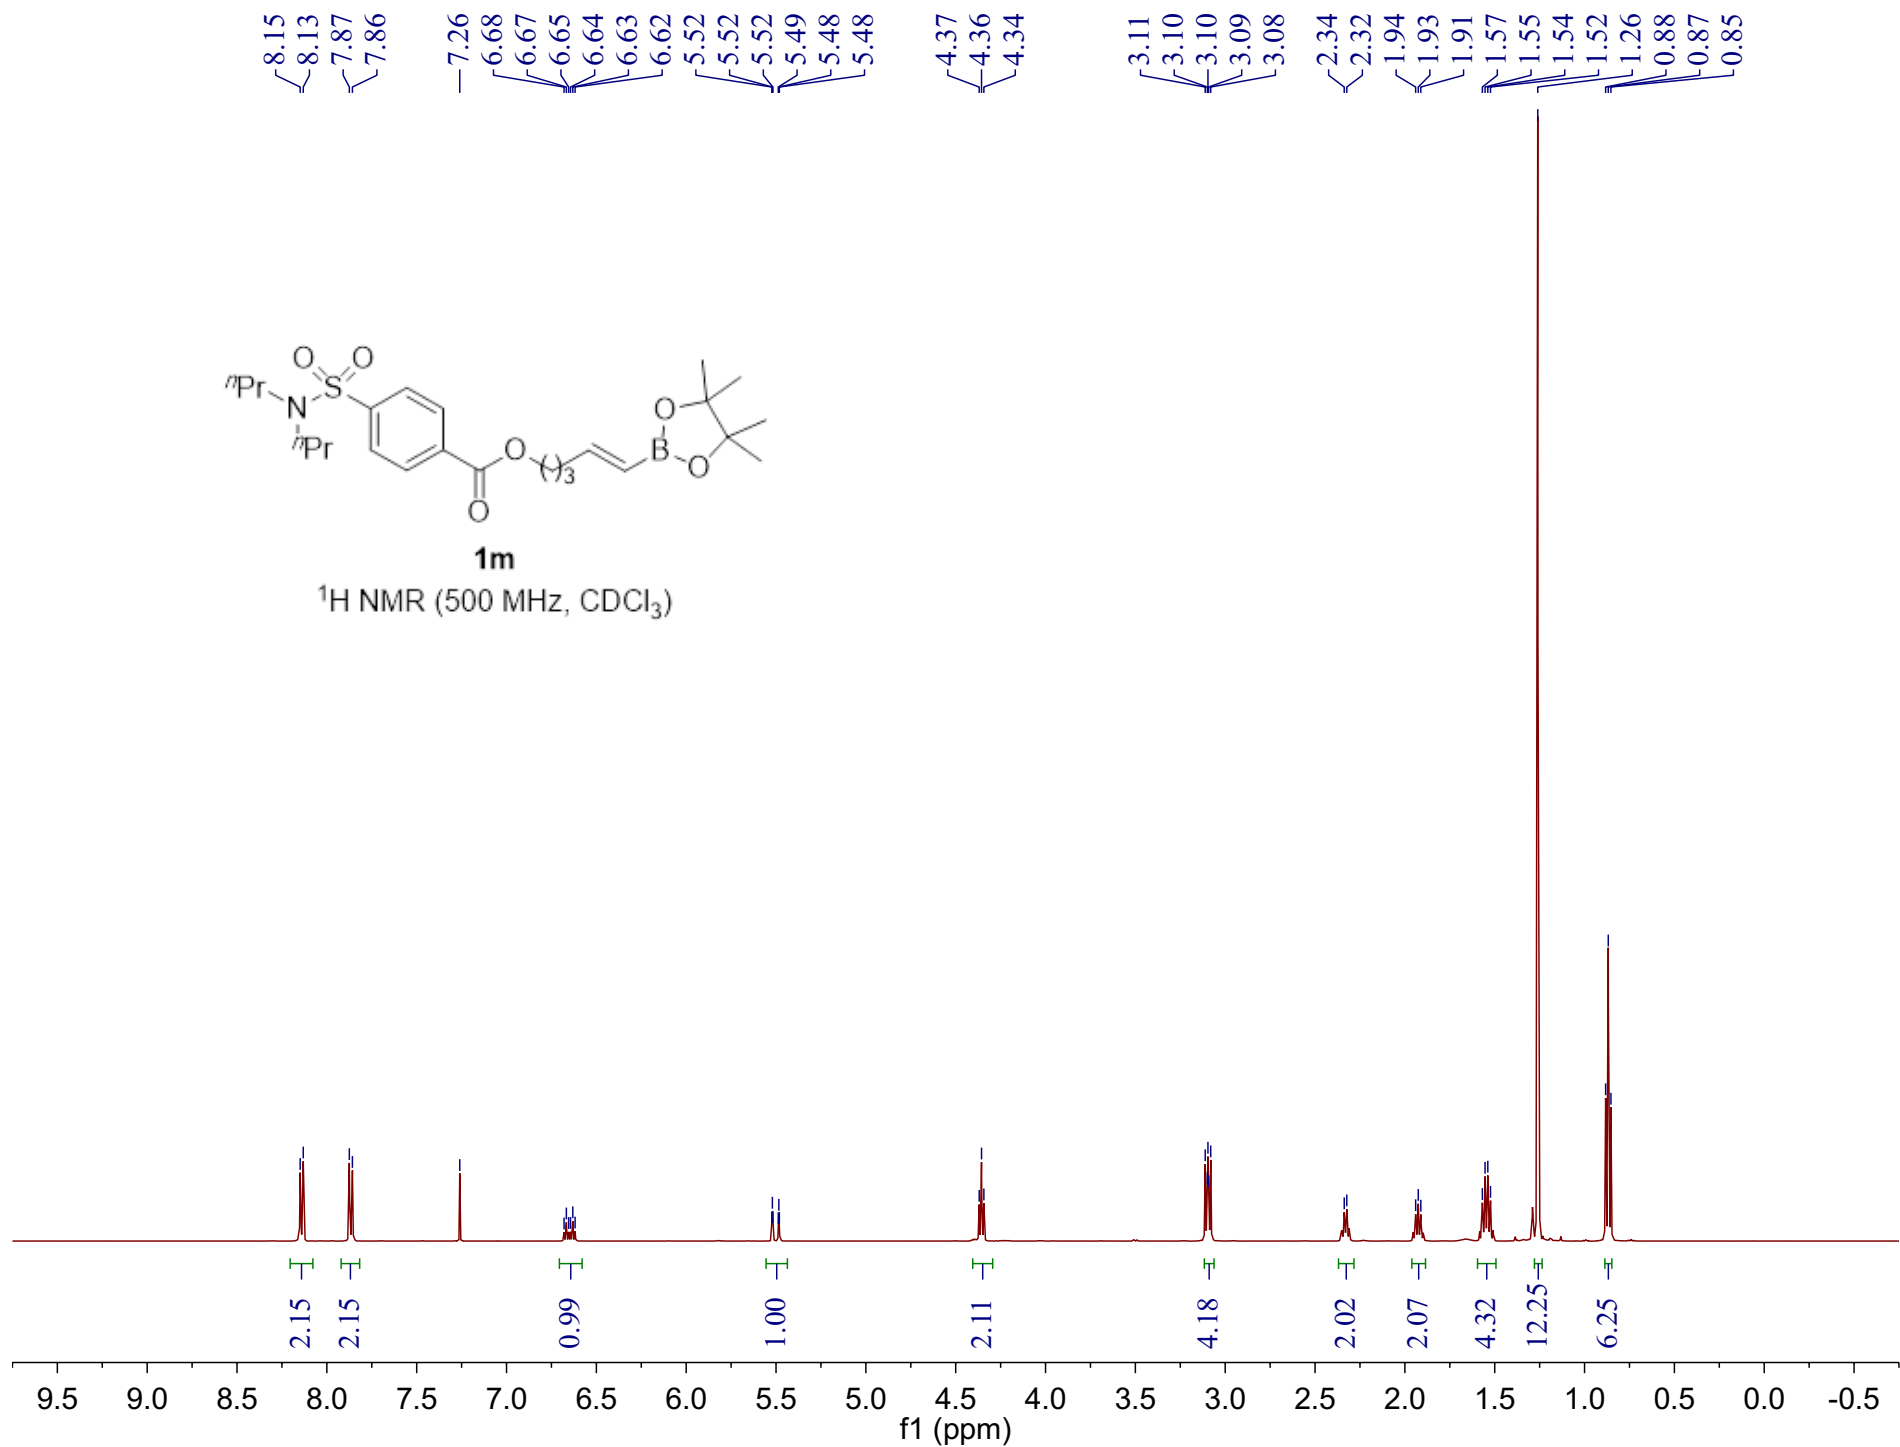

Supplementary Figure 150: <sup>1</sup>H NMR (500 MHz, CDCl<sub>3</sub>) spectrum of **1m**.

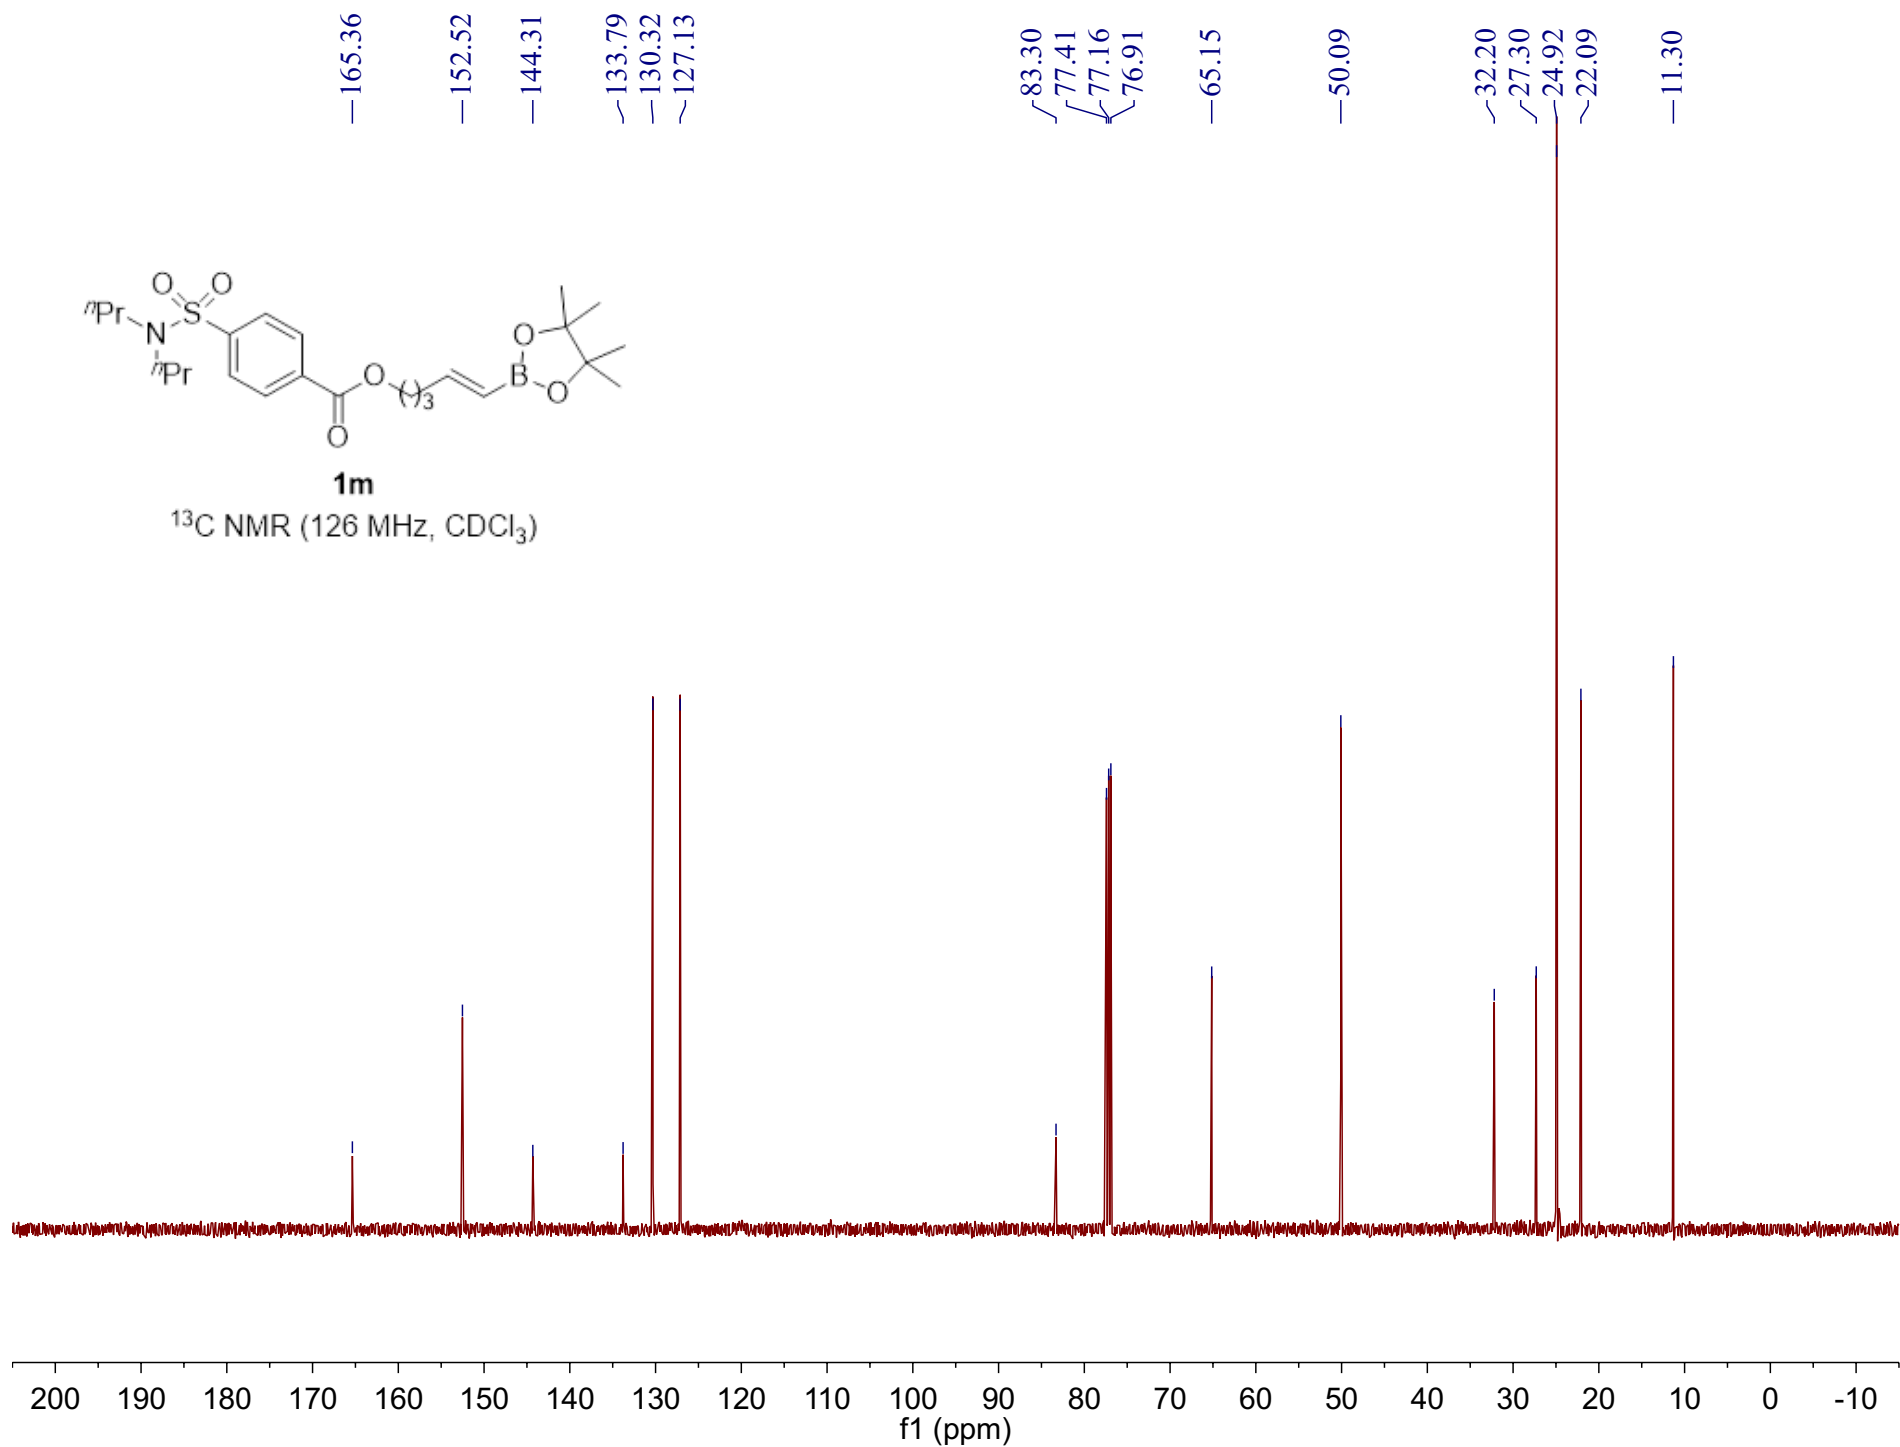

Supplementary Figure 151: <sup>13</sup>C NMR (126 MHz, CDCl<sub>3</sub>) spectrum of **1m**.

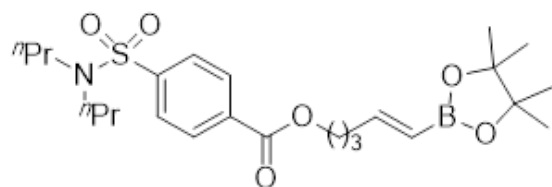

**1m**

<sup>11</sup>B NMR (160 MHz, CDCl<sub>3</sub>)

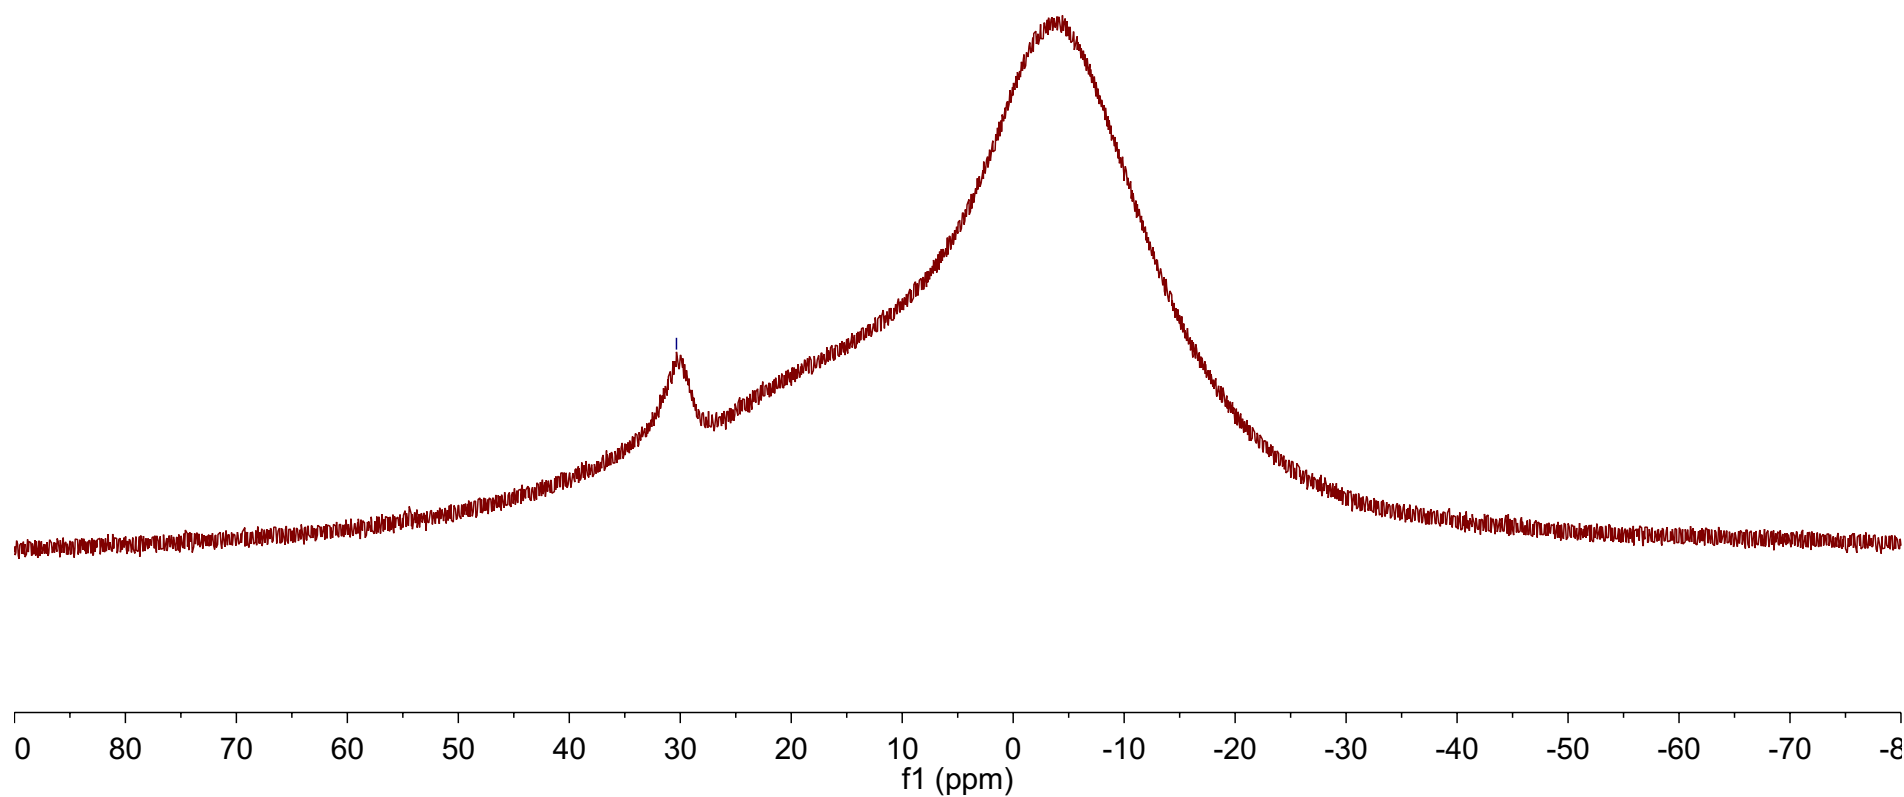

Supplementary Figure 152: <sup>11</sup>B NMR (160 MHz, CDCl<sub>3</sub>) spectrum of **1m**.



7.26  
6.62  
6.61  
6.59  
6.58  
6.57  
6.56  
5.47  
5.46  
5.46  
5.43  
5.43  
5.42  
4.70  
4.69  
4.67  
4.67  
4.65  
4.64  
2.30  
2.29  
2.27  
2.21  
2.19  
2.18  
2.16  
1.97  
1.95  
1.86  
1.85  
1.84  
1.77  
1.75  
1.74  
1.67  
1.65  
1.47  
1.37  
1.35  
1.33  
1.26  
1.06  
1.03  
0.95  
0.93  
0.90  
0.89  
0.89  
0.88  
0.85  
0.75  
0.74

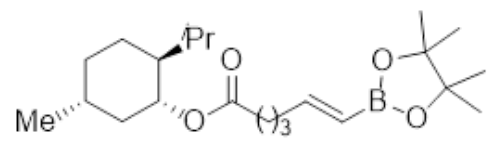

**1n**

<sup>1</sup>H NMR (500 MHz, CDCl<sub>3</sub>)

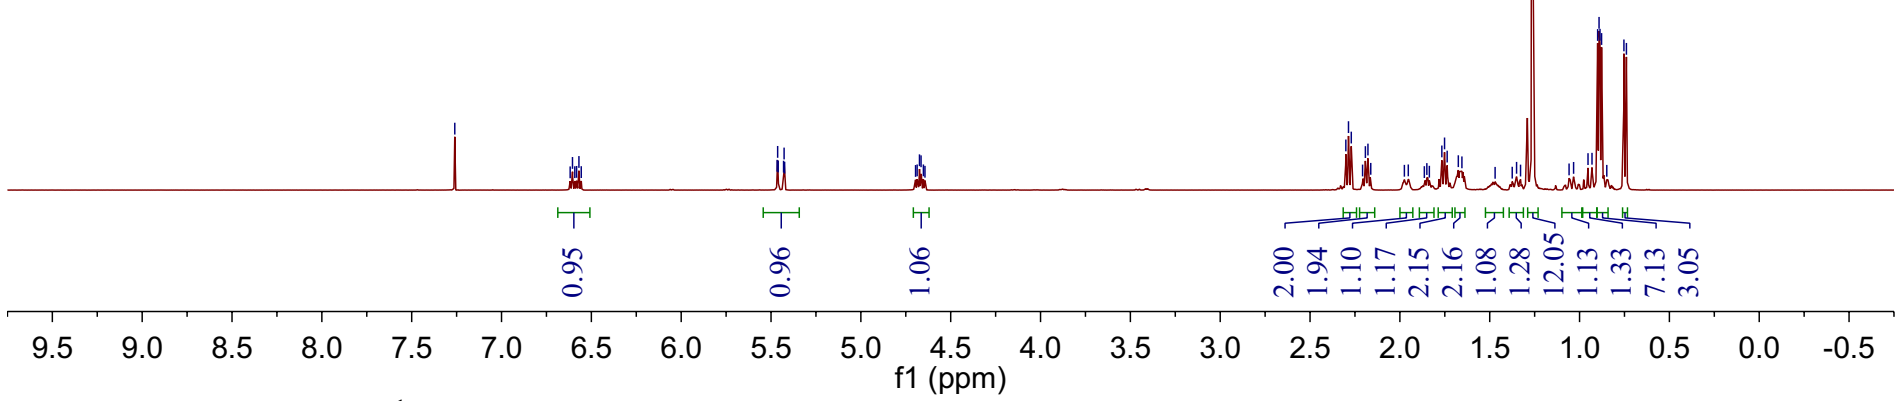

Supplementary Figure 153: <sup>1</sup>H NMR (500 MHz, CDCl<sub>3</sub>) spectrum of **1n**.

—173.16

—153.20

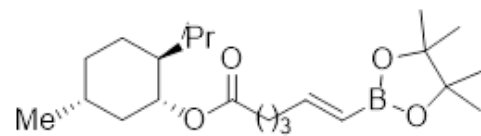

**1n**

<sup>13</sup>C NMR (126 MHz, CDCl<sub>3</sub>)

83.22  
77.41  
77.16  
76.91  
74.13

47.16  
41.10  
35.20  
34.42  
34.28  
31.53  
26.38  
24.93  
23.80  
23.55  
22.17  
20.92  
16.42

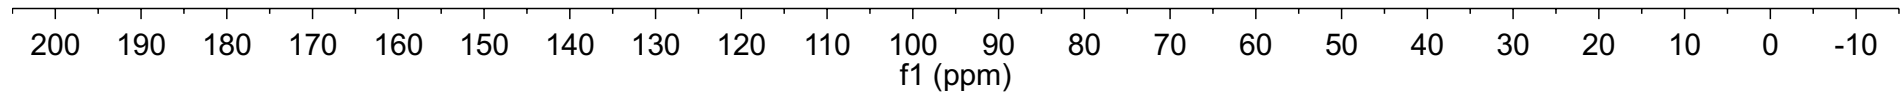

Supplementary Figure 154: <sup>13</sup>C NMR (126 MHz, CDCl<sub>3</sub>) spectrum of **1n**.

—29.88

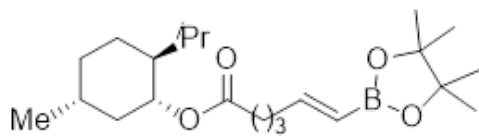

**1n**

<sup>11</sup>B NMR (160 MHz, CDCl<sub>3</sub>)

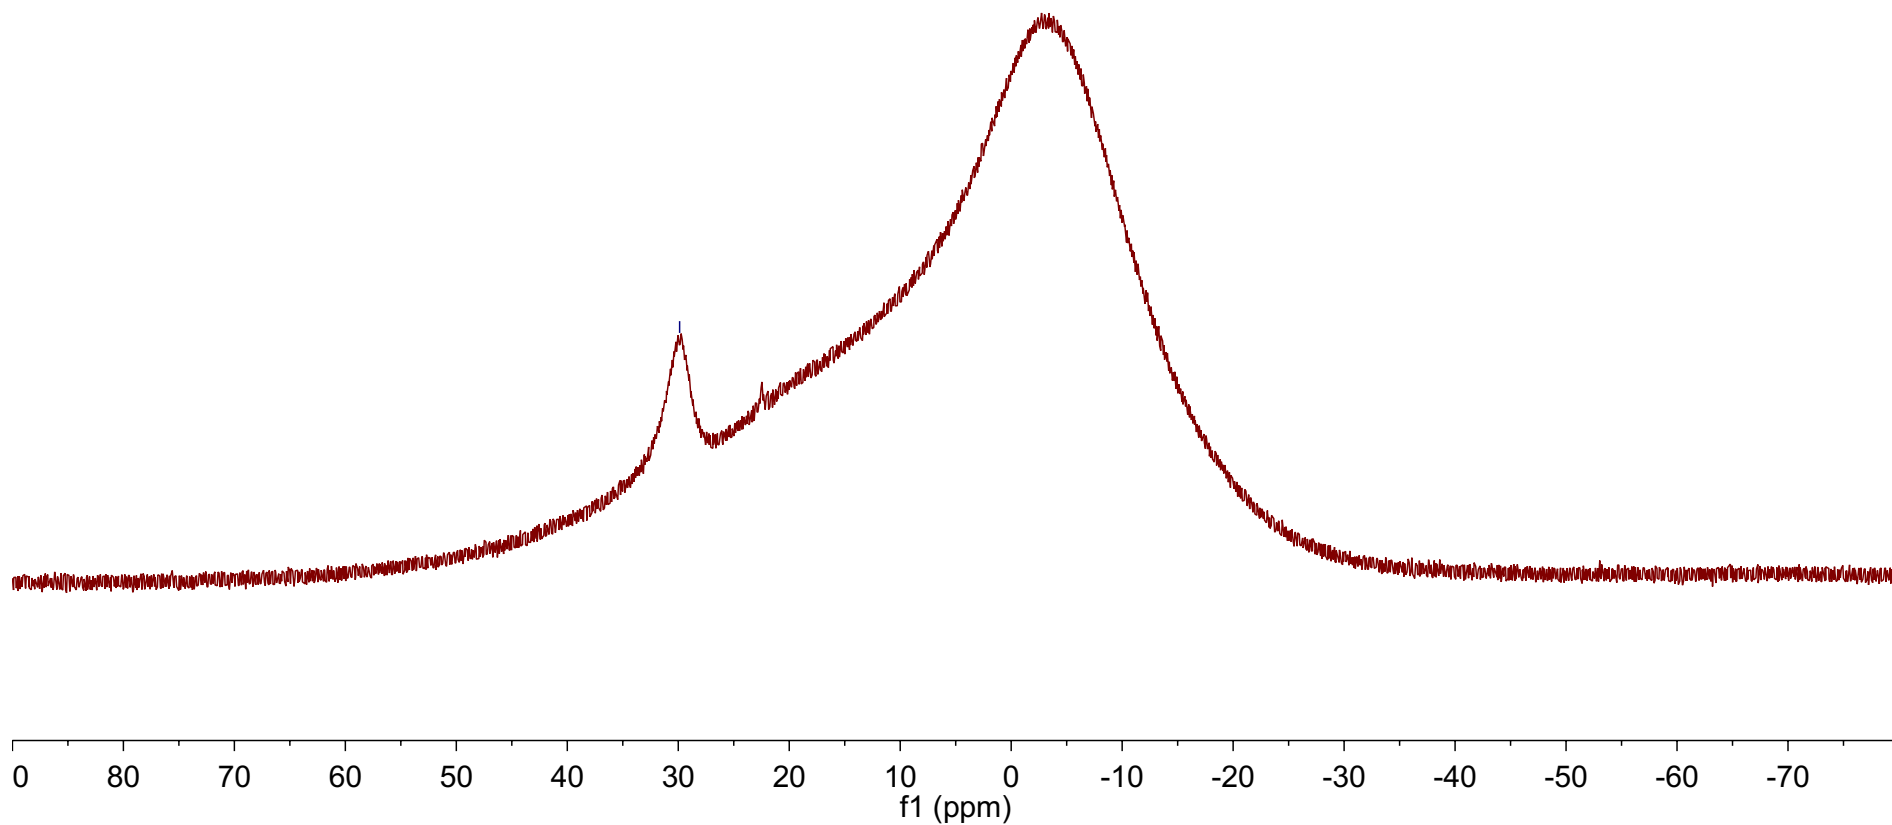

Supplementary Figure 155: <sup>11</sup>B NMR (160 MHz, CDCl<sub>3</sub>) spectrum of **1n**.

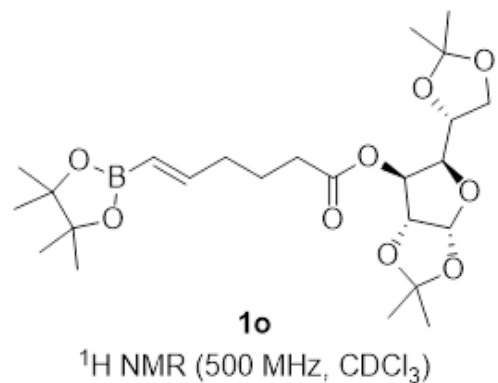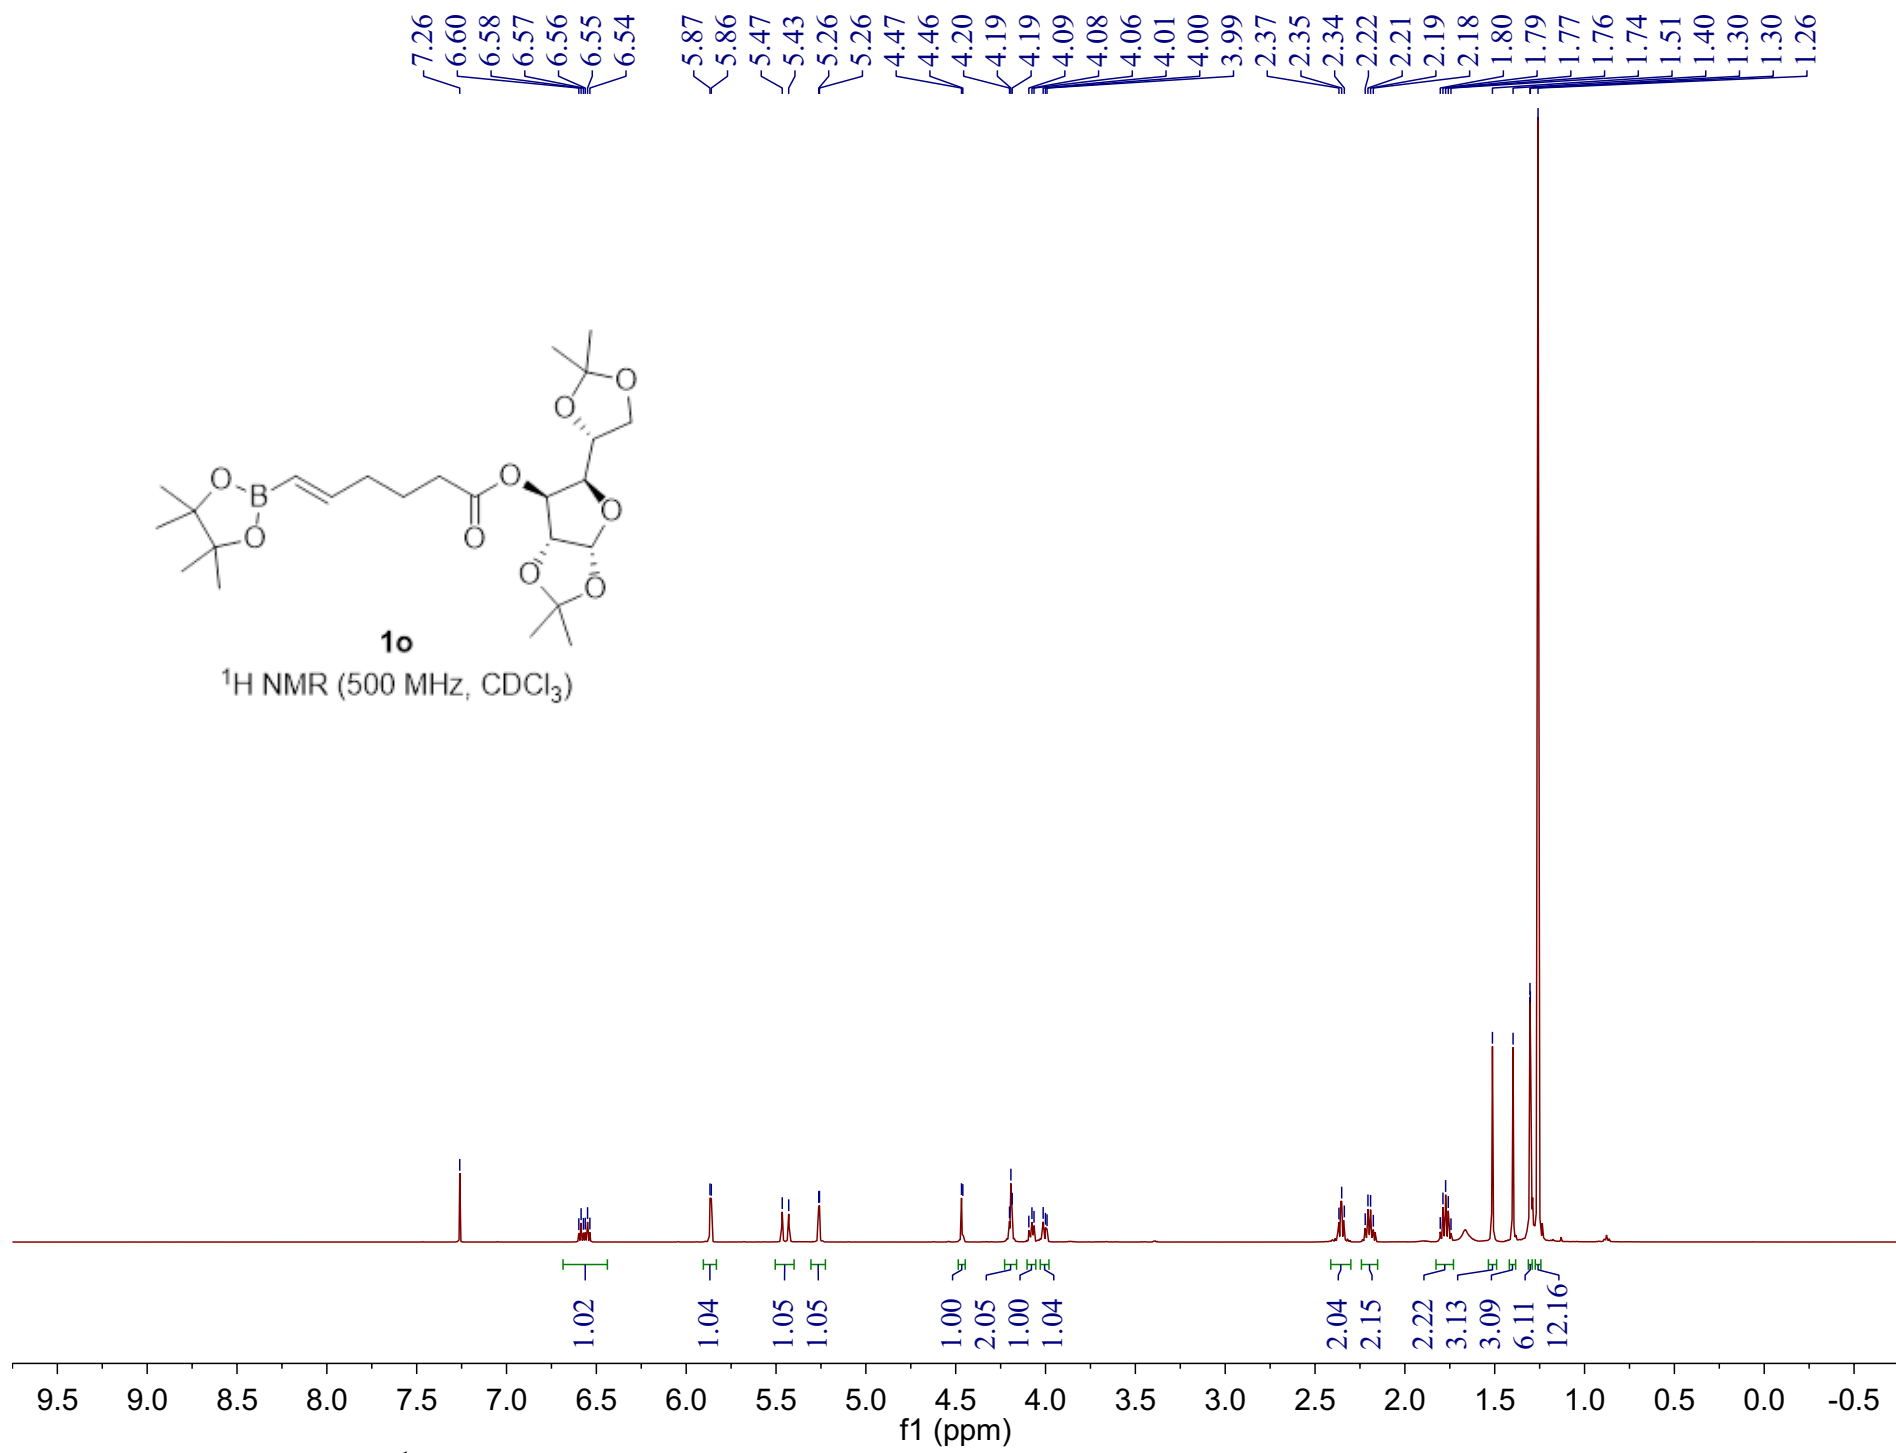

Supplementary Figure 156: <sup>1</sup>H NMR (500 MHz, CDCl<sub>3</sub>) spectrum of **1o**.

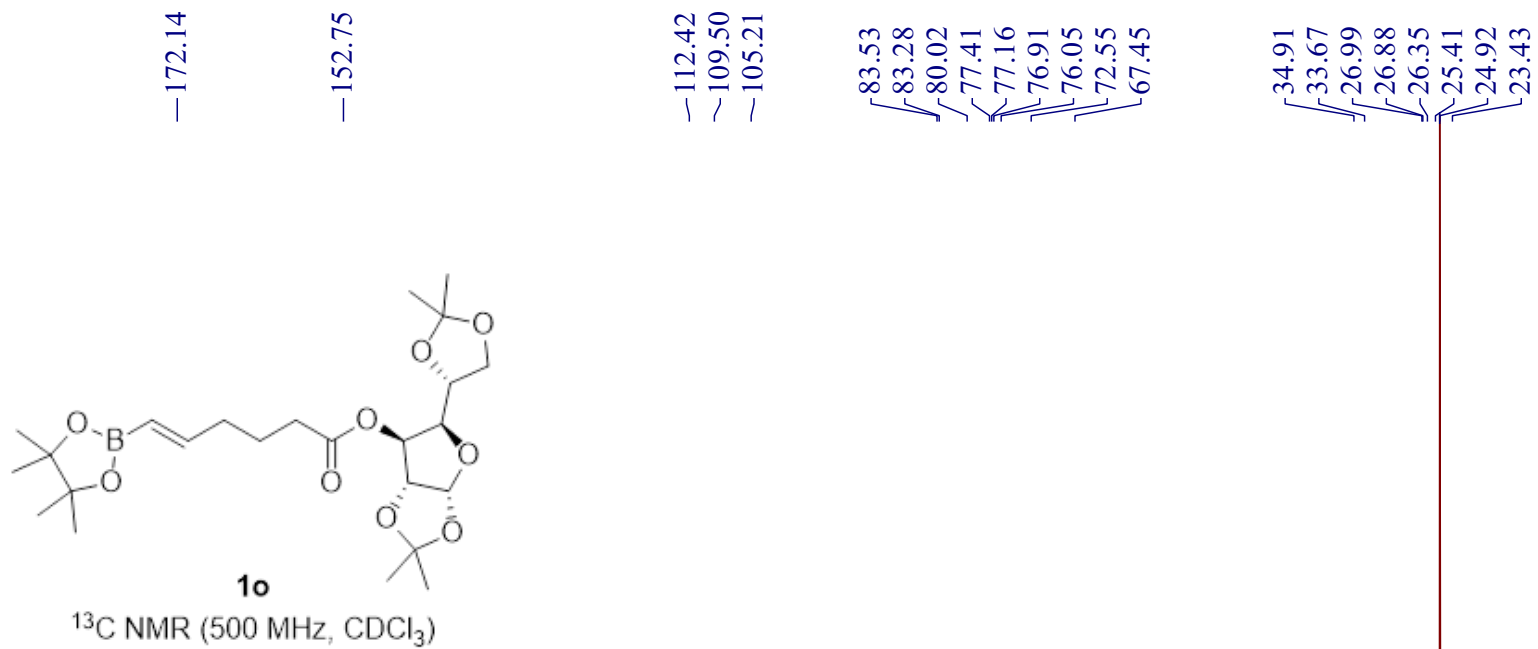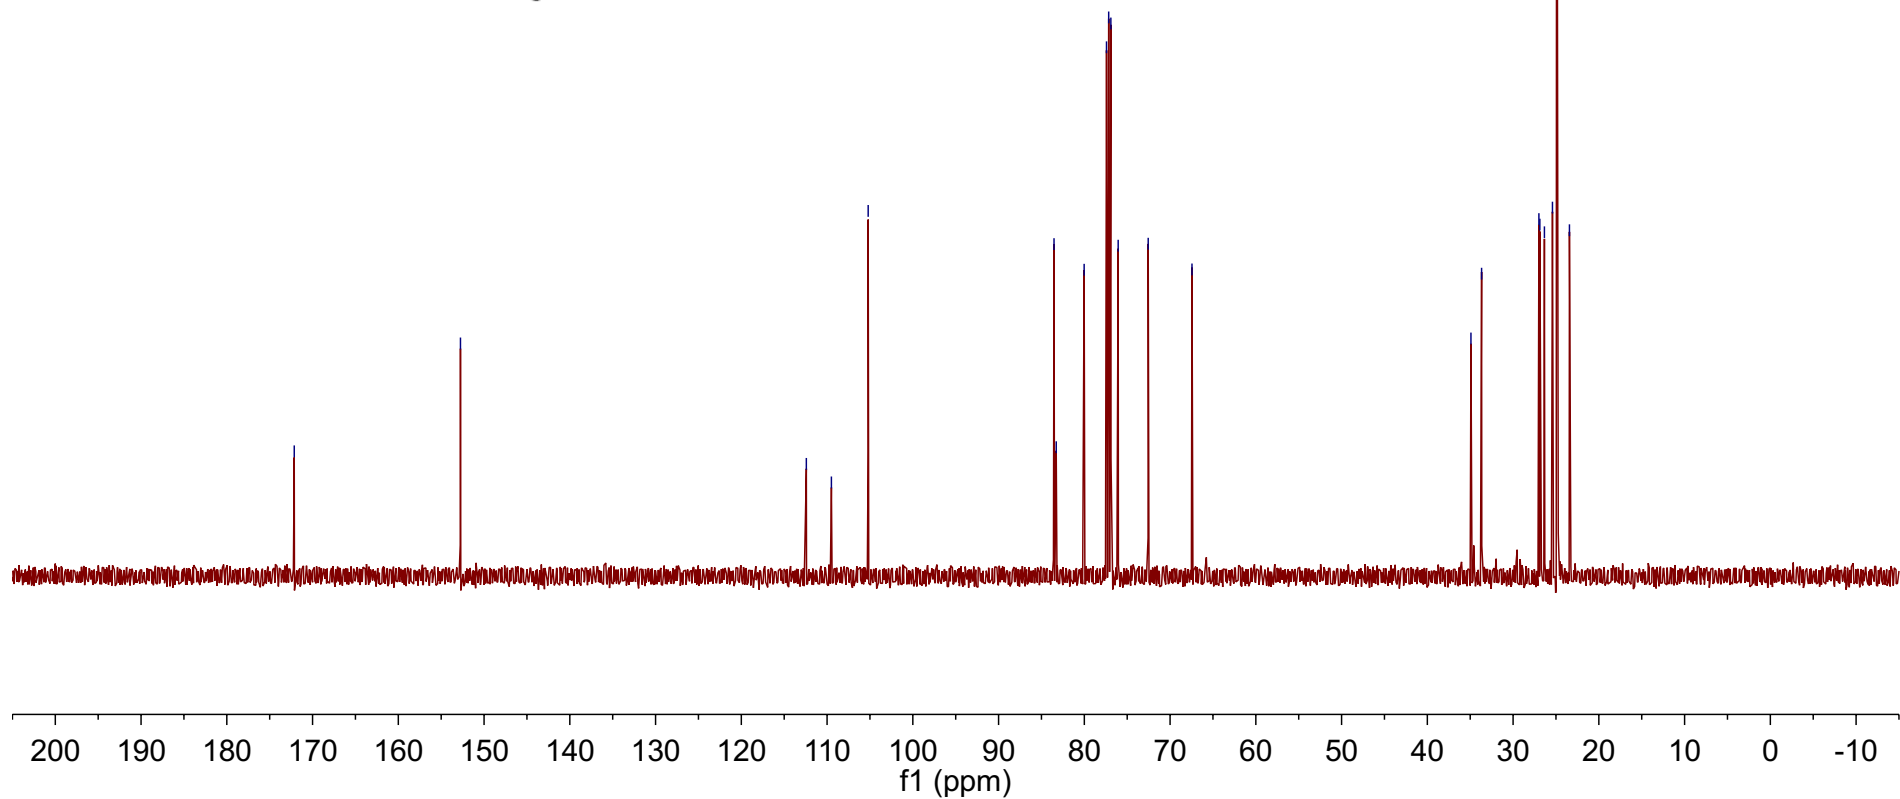

Supplementary Figure 157:  $^{13}\text{C}$  NMR (126 MHz,  $\text{CDCl}_3$ ) spectrum of **1o**.

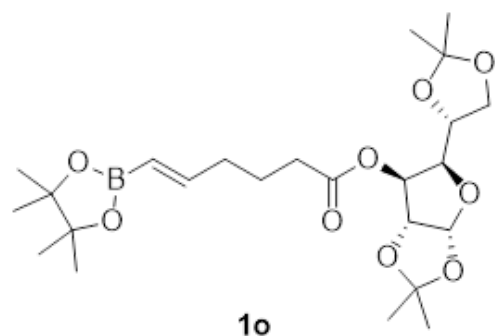

$^{11}\text{B}$  NMR (500 MHz,  $\text{CDCl}_3$ )

—30.00

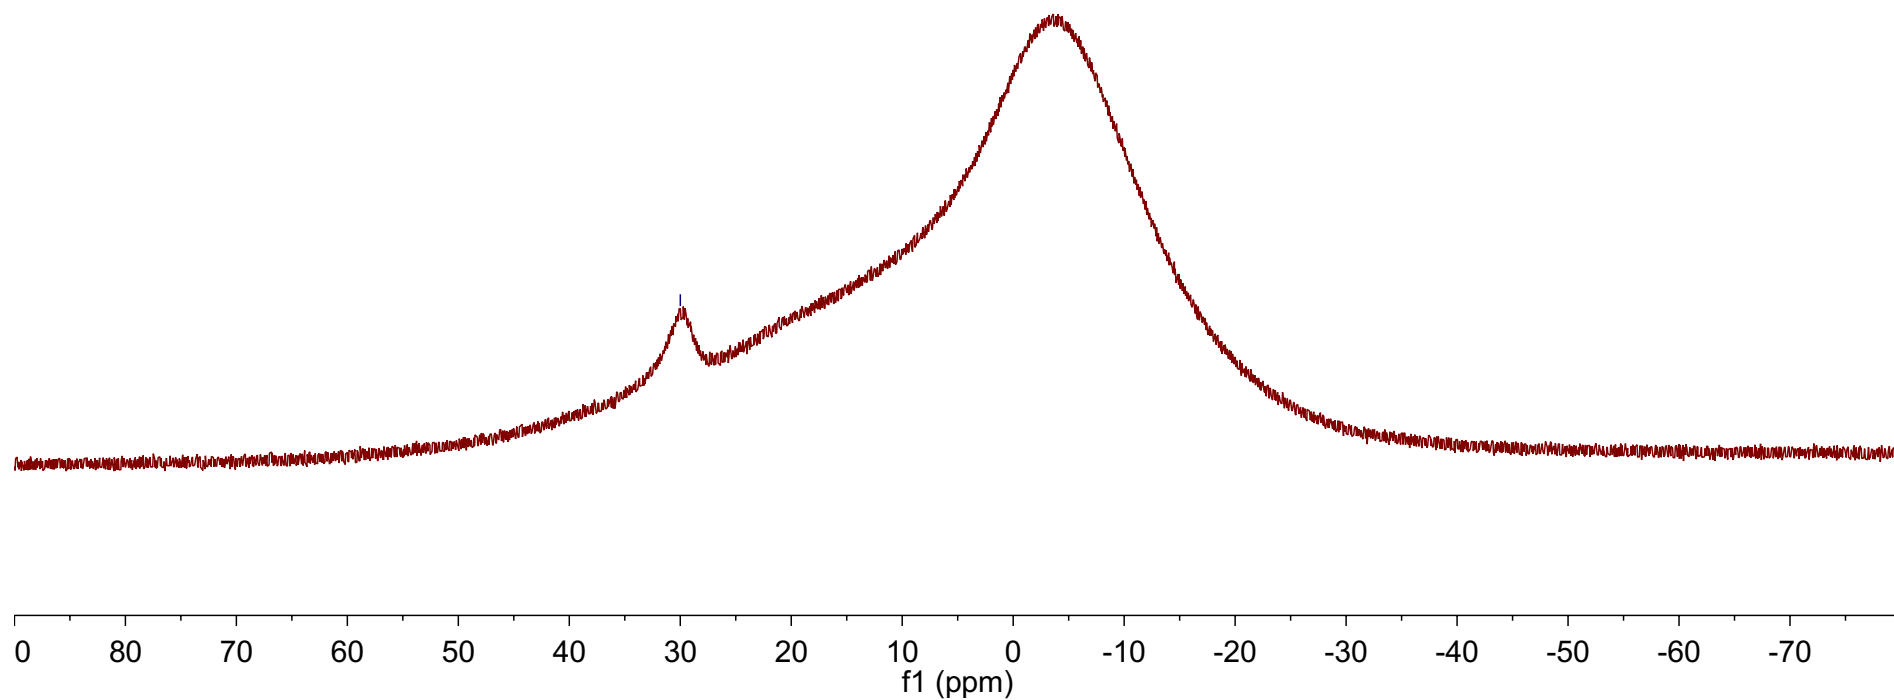

Supplementary Figure 158:  $^{11}\text{B}$  NMR (160 MHz,  $\text{CDCl}_3$ ) spectrum of **1o**.

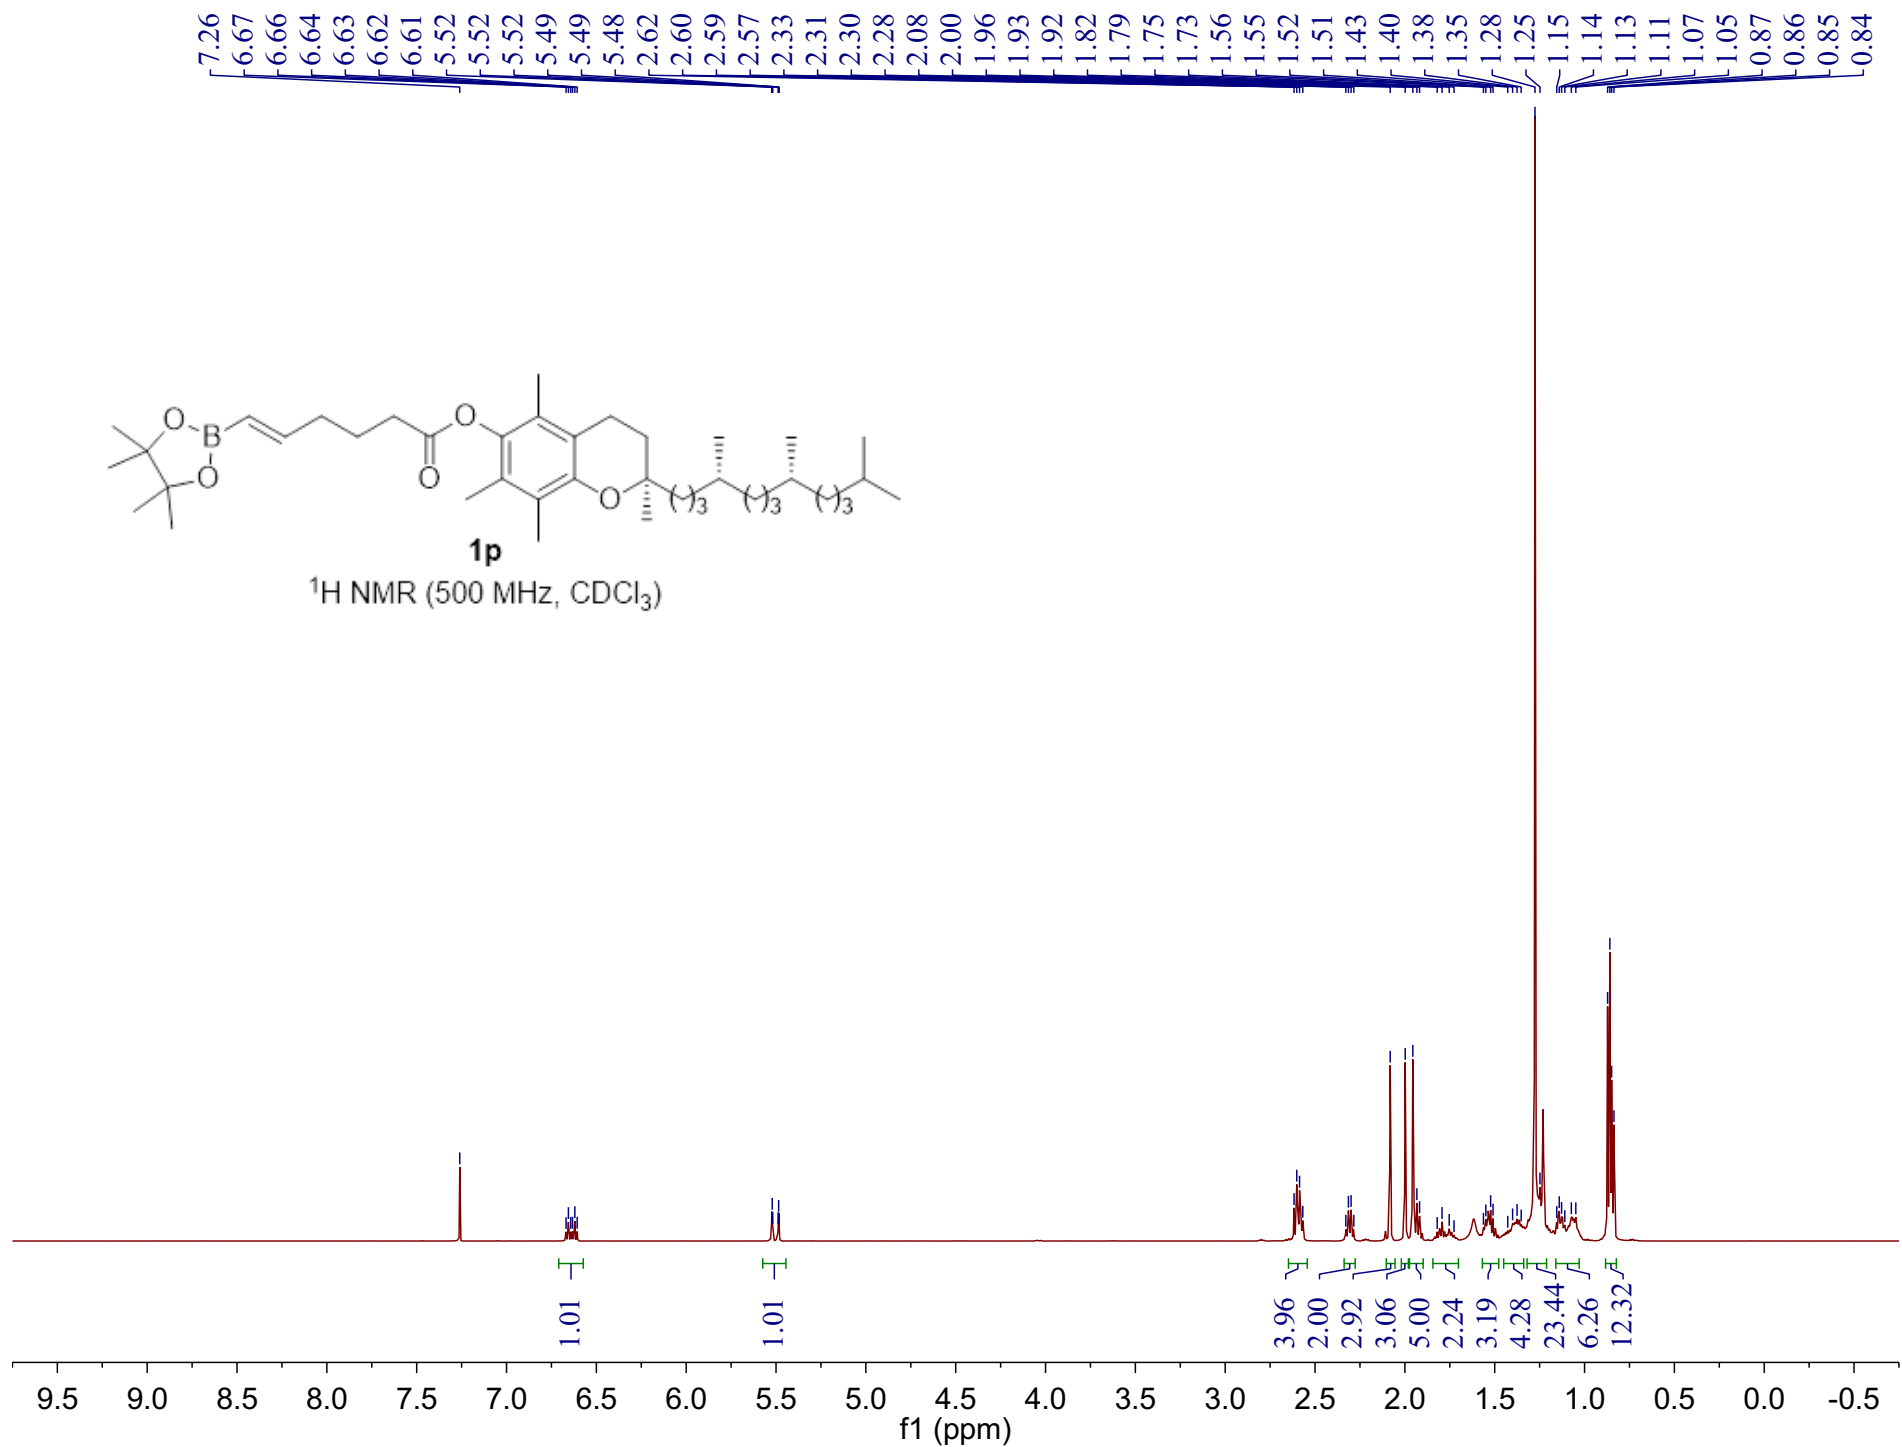

Supplementary Figure 159: <sup>1</sup>H NMR (500 MHz, CDCl<sub>3</sub>) spectrum of **1p**.

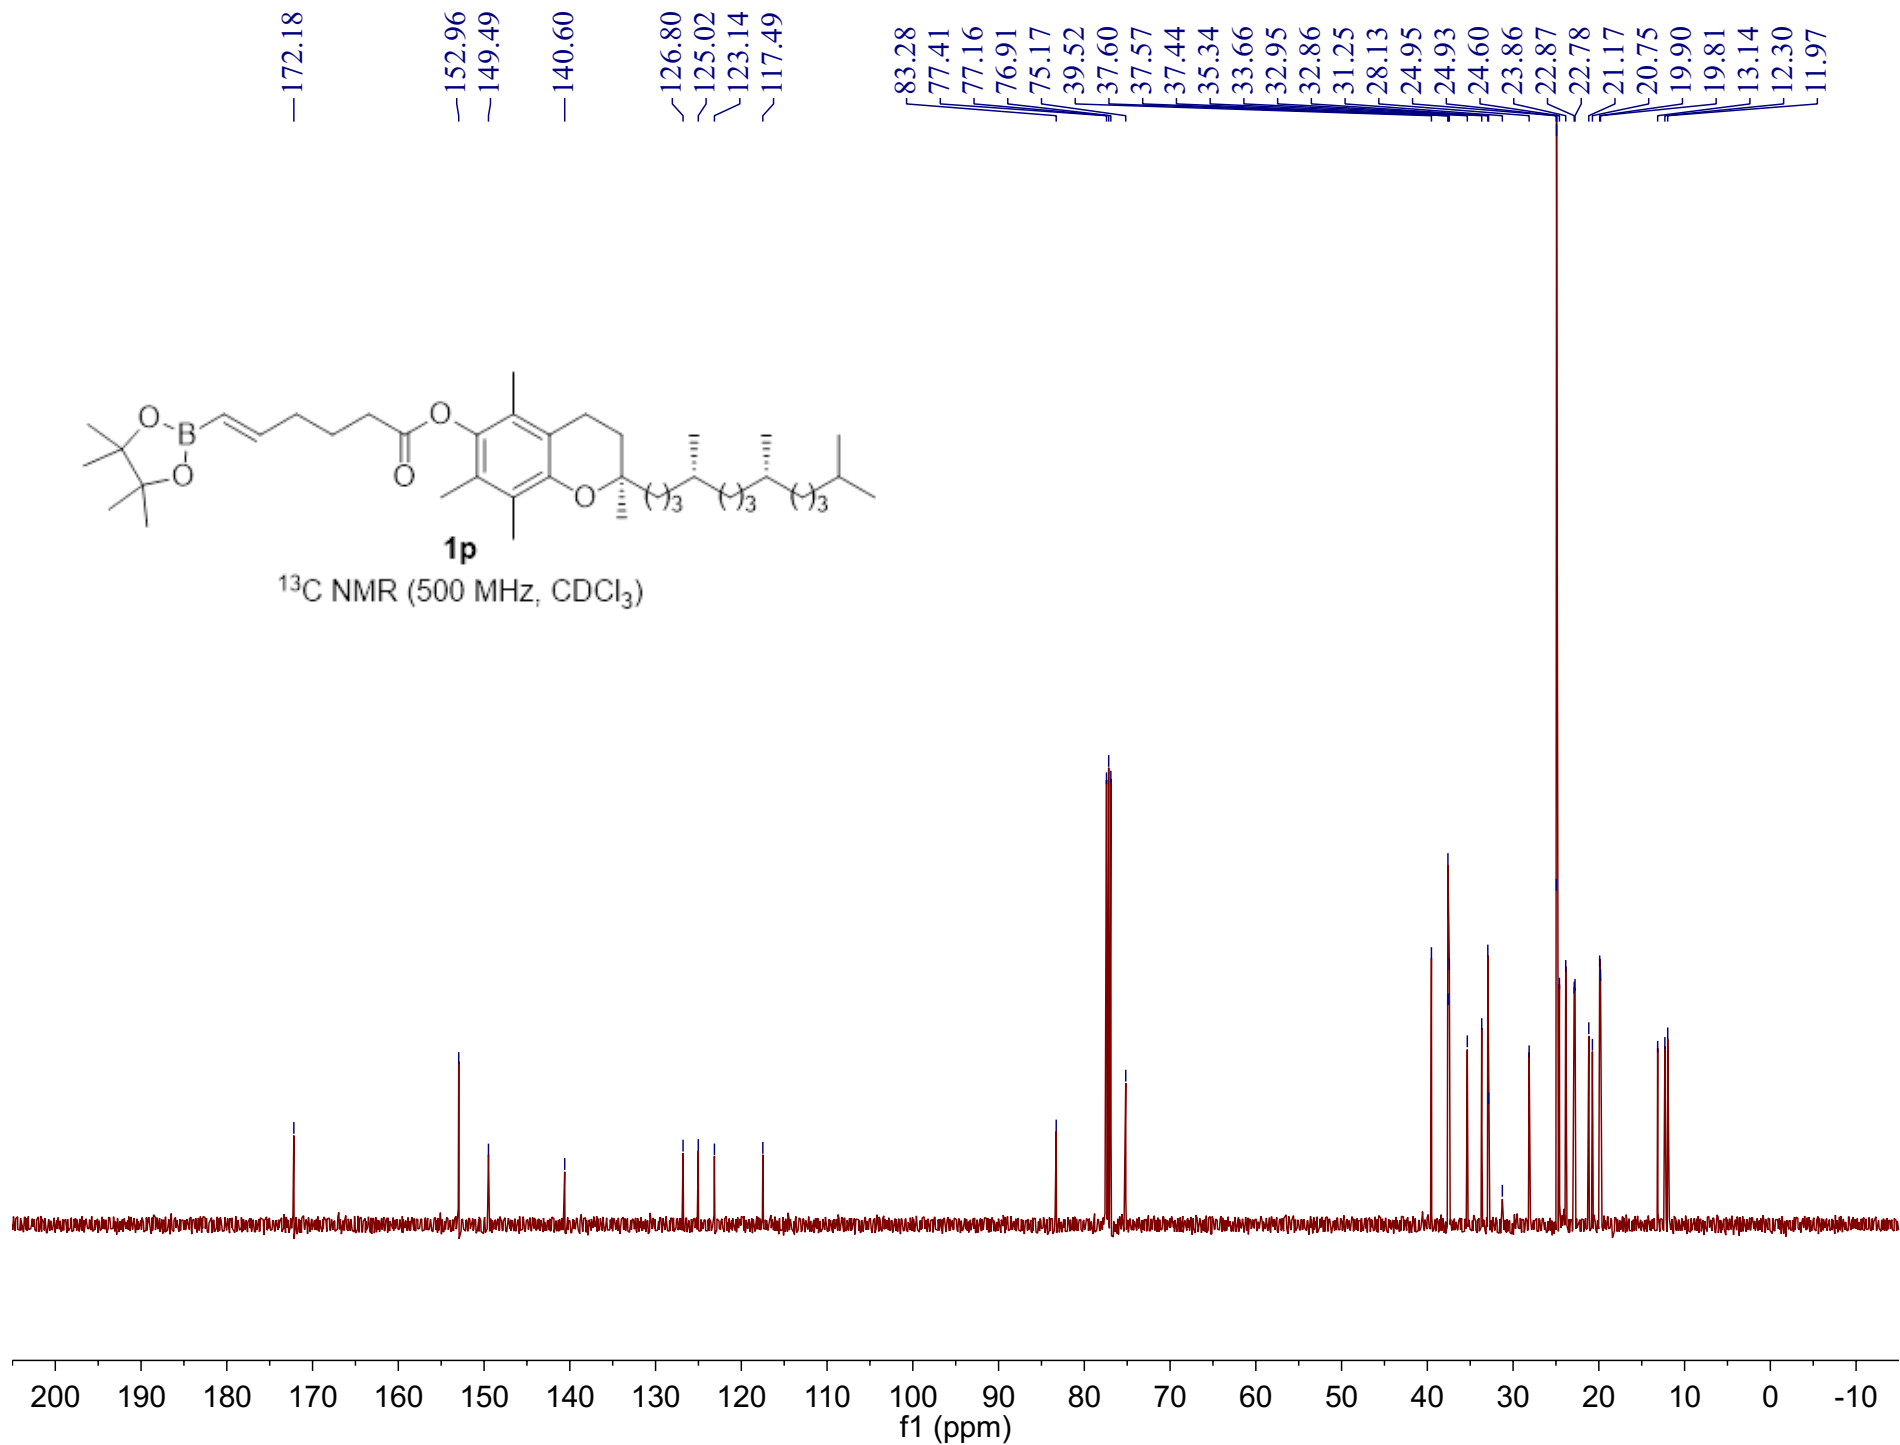

Supplementary Figure 160:  $^{13}\text{C}$  NMR (126 MHz,  $\text{CDCl}_3$ ) spectrum of **1p**.



-29.93

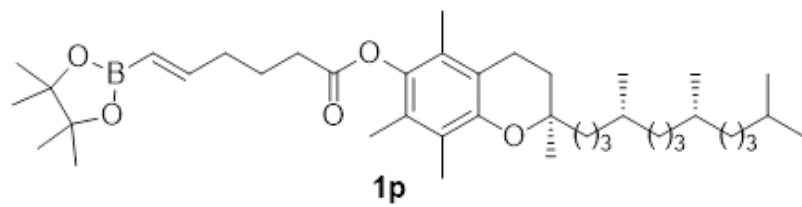

**1p**  
 $^{11}\text{B}$  NMR (500 MHz,  $\text{CDCl}_3$ )

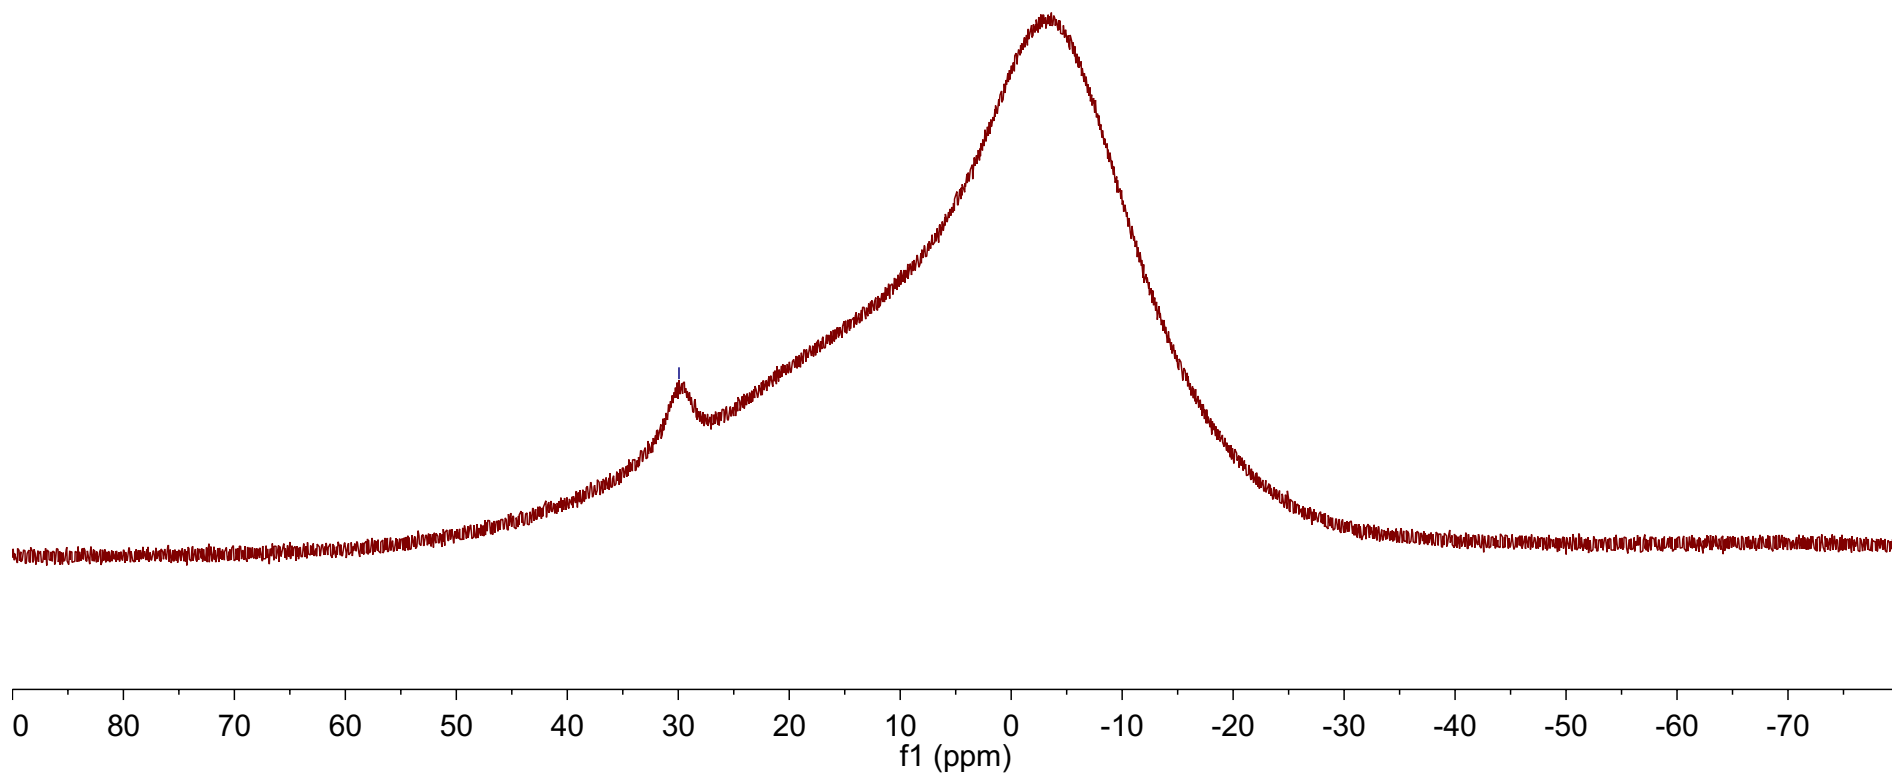

Supplementary Figure 161:  $^{11}\text{B}$  NMR (160 MHz,  $\text{CDCl}_3$ ) spectrum of **1p**.

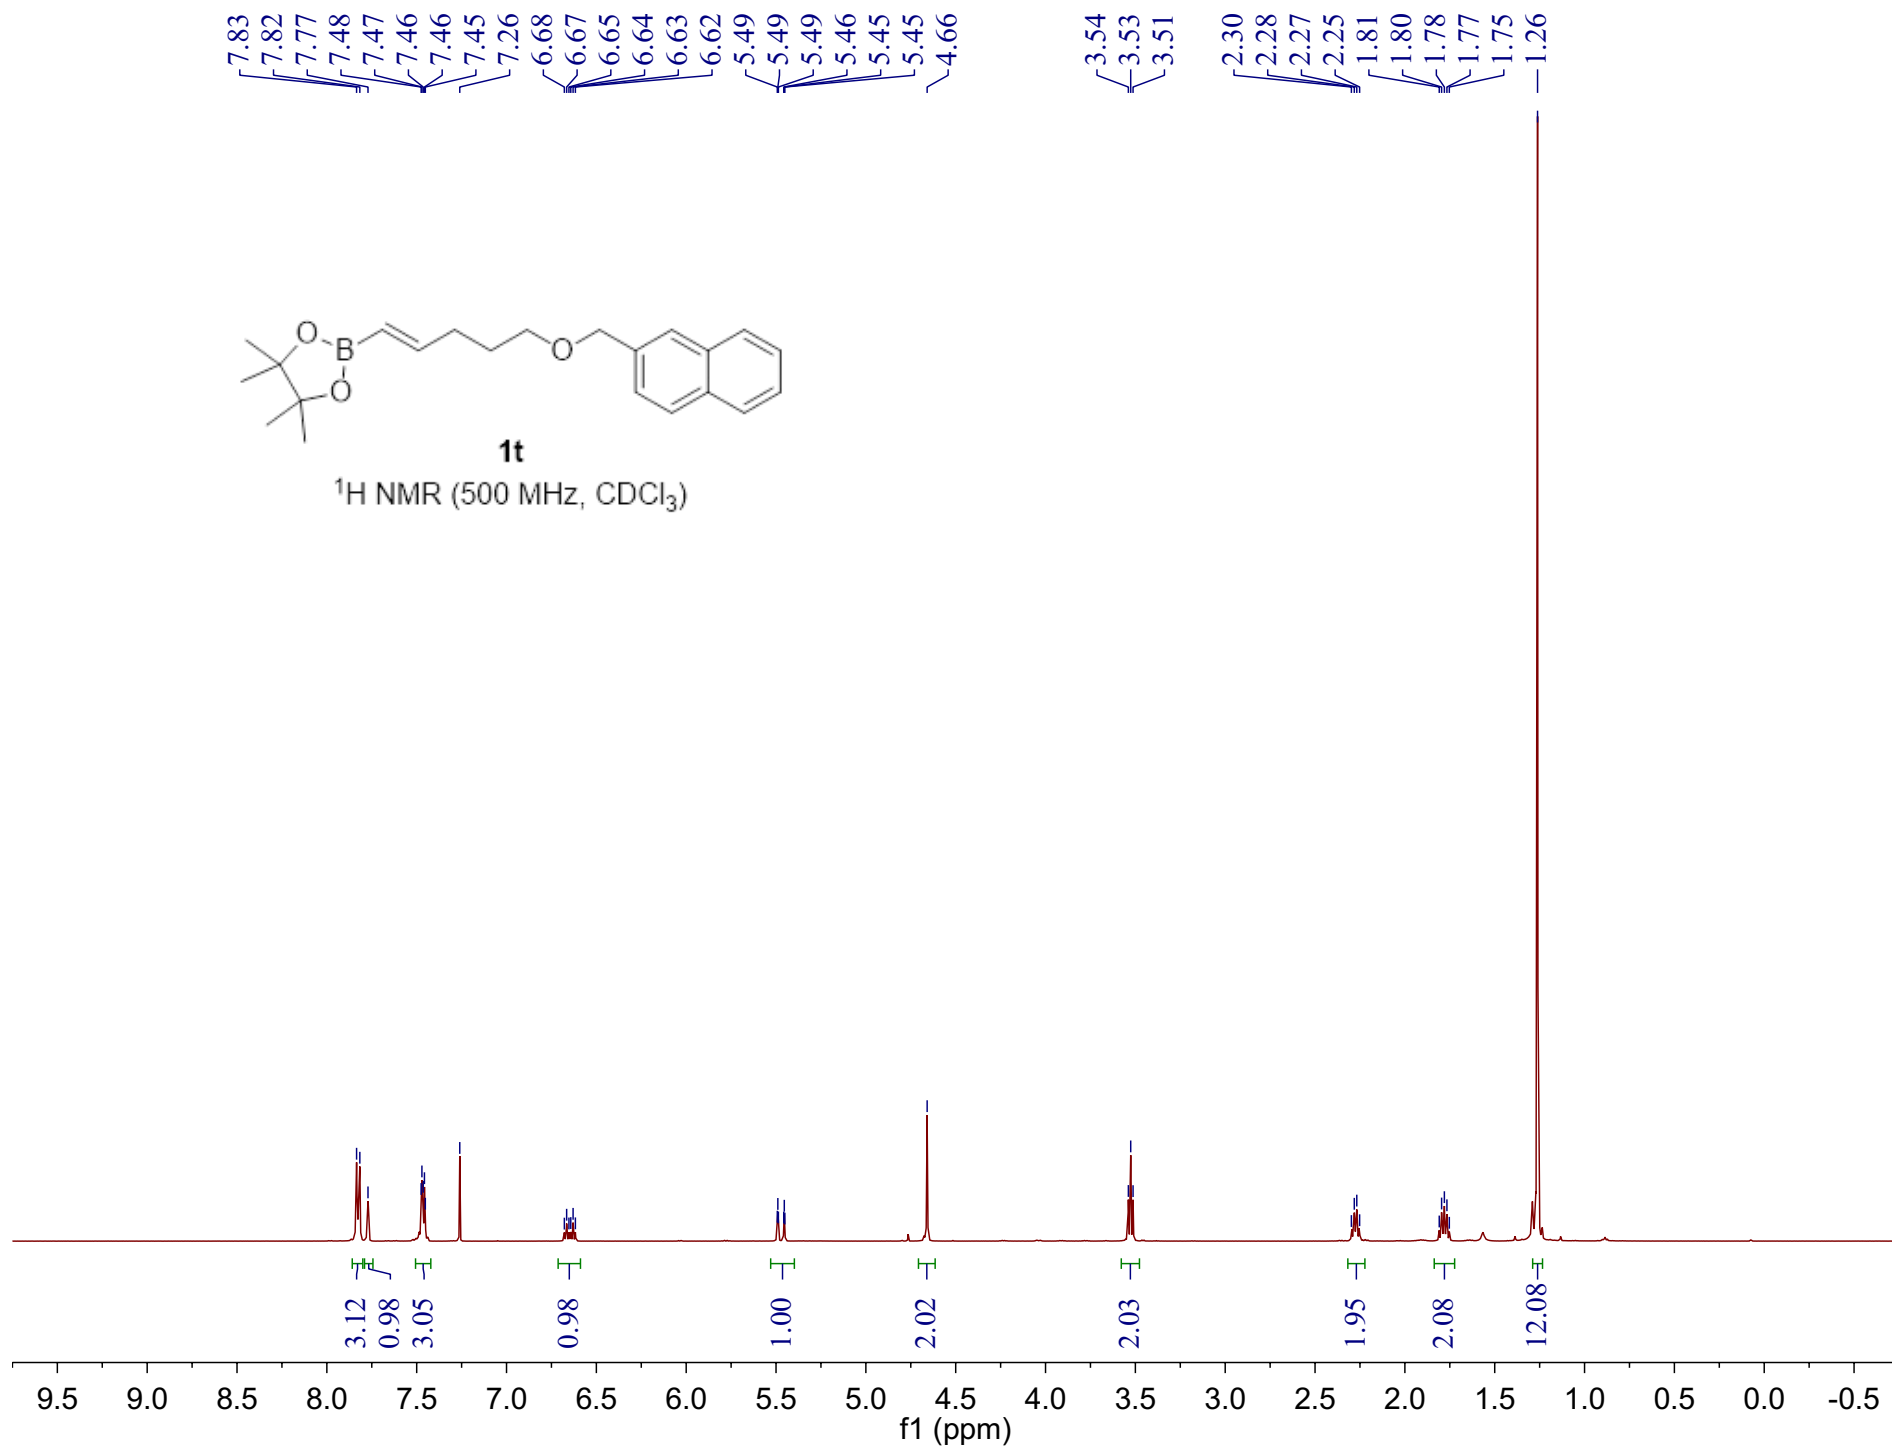

Supplementary Figure 162: <sup>1</sup>H NMR (500 MHz, CDCl<sub>3</sub>) spectrum of **1t**.

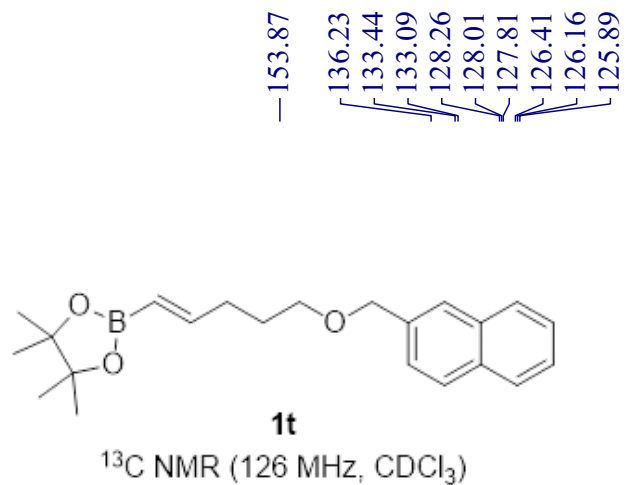

153.87  
136.23  
133.44  
133.09  
128.26  
128.01  
127.81  
126.41  
126.16  
125.89

83.18  
77.41  
77.16  
76.91  
73.12  
69.93

32.51  
28.44  
24.92

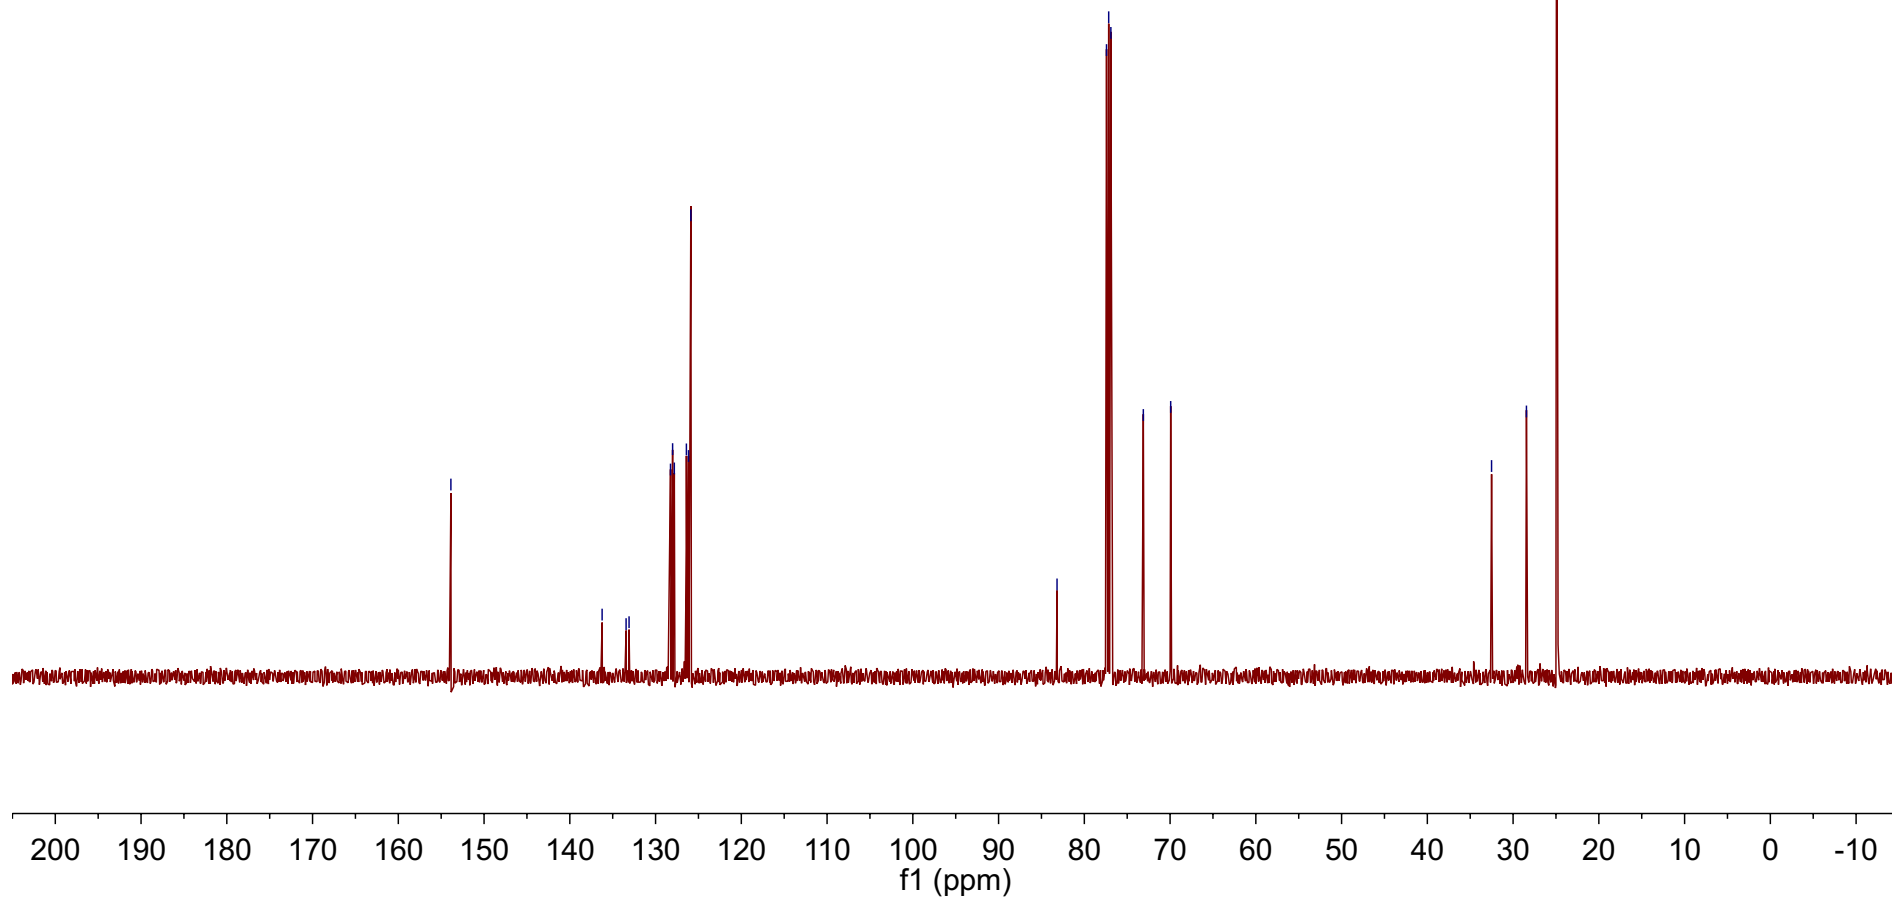

Supplementary Figure 163: <sup>13</sup>C NMR (126 MHz, CDCl<sub>3</sub>) spectrum of **1t**.

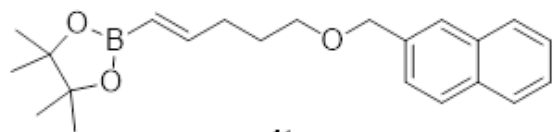

**1t**

$^{11}\text{B}$  NMR (160 MHz,  $\text{CDCl}_3$ )

-29.96

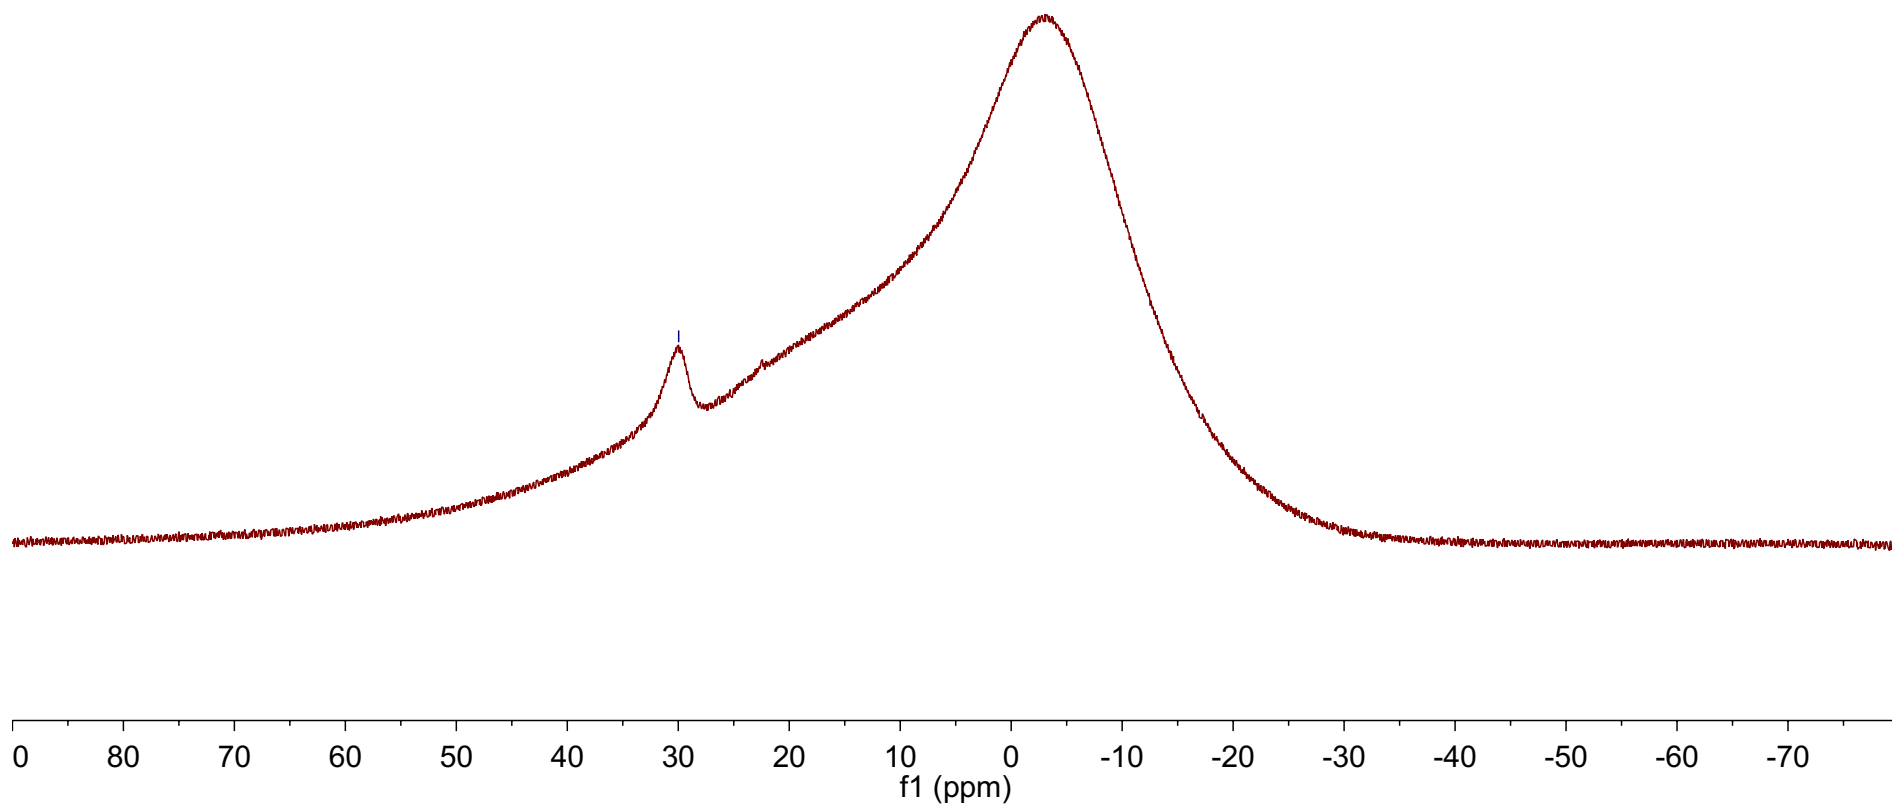

Supplementary Figure 164:  $^{11}\text{B}$  NMR (160 MHz,  $\text{CDCl}_3$ ) spectrum of **1t**.

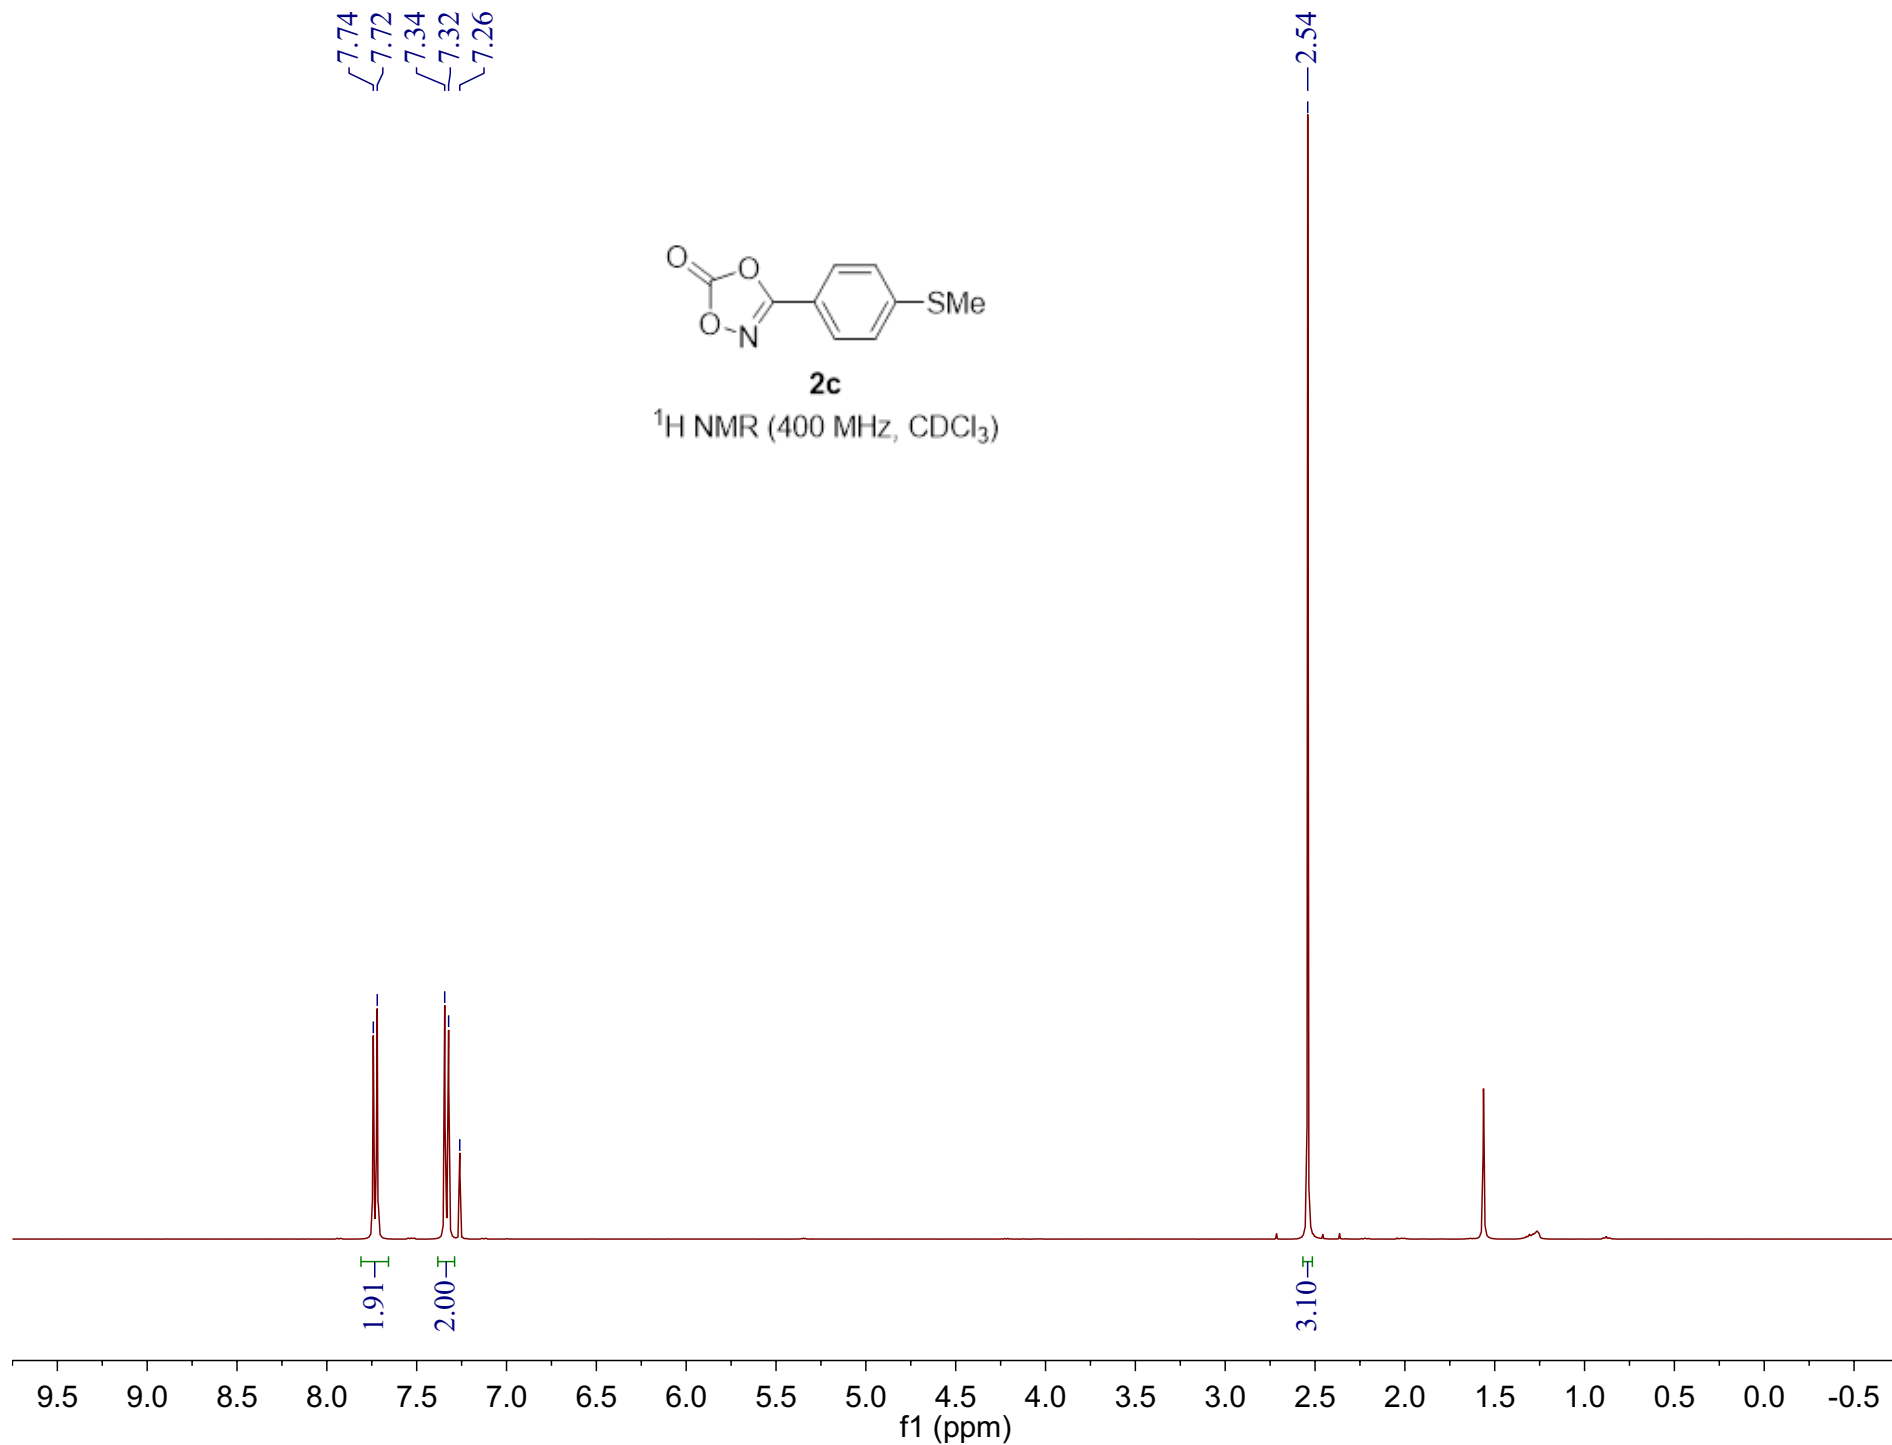

Supplementary Figure 165: <sup>1</sup>H NMR (400 MHz, CDCl<sub>3</sub>) spectrum of **2c**.

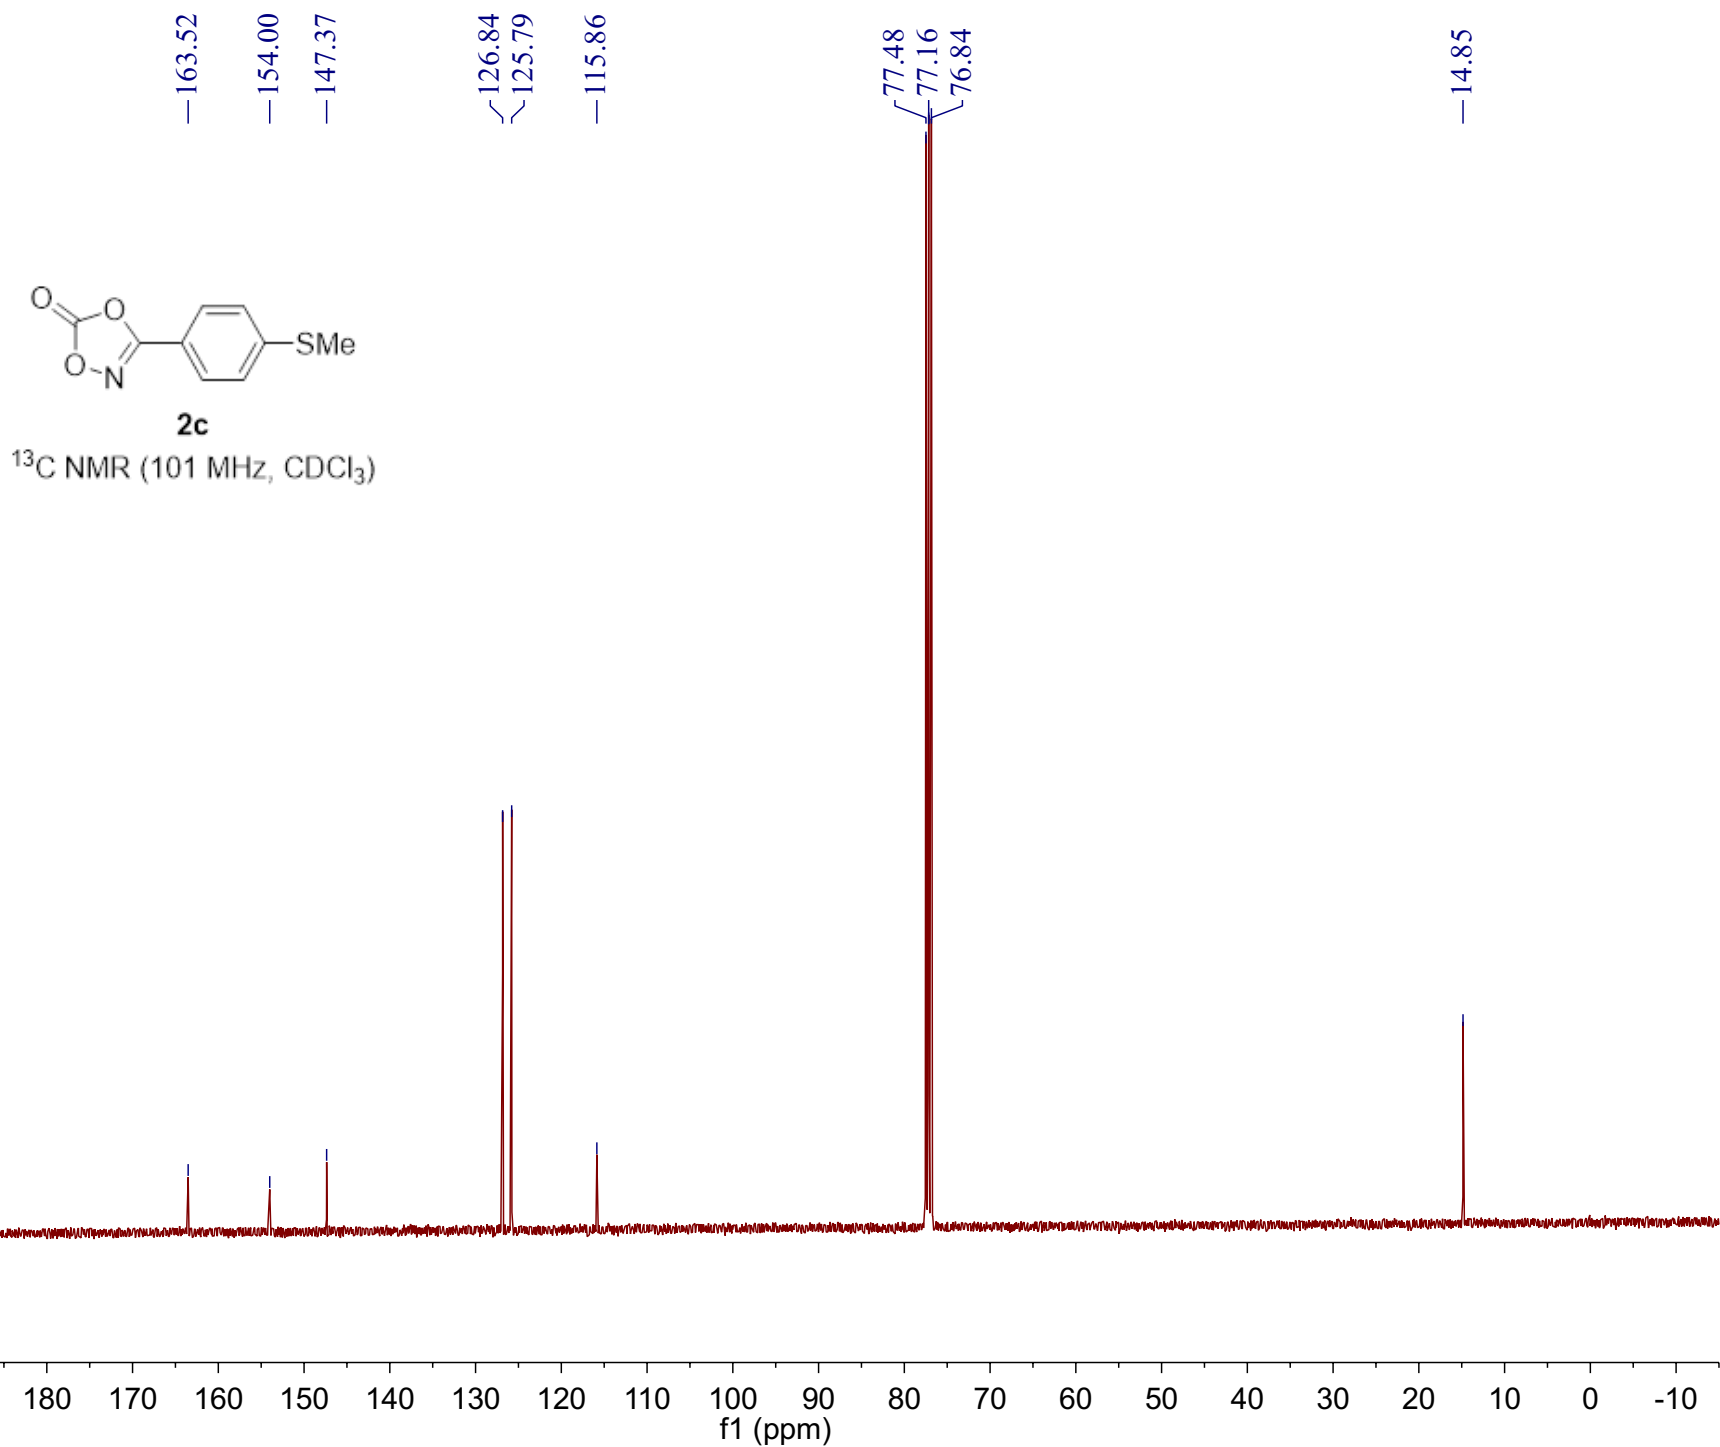

Supplementary Figure 166: <sup>13</sup>C NMR (101 MHz, CDCl<sub>3</sub>) spectrum of **2c**.

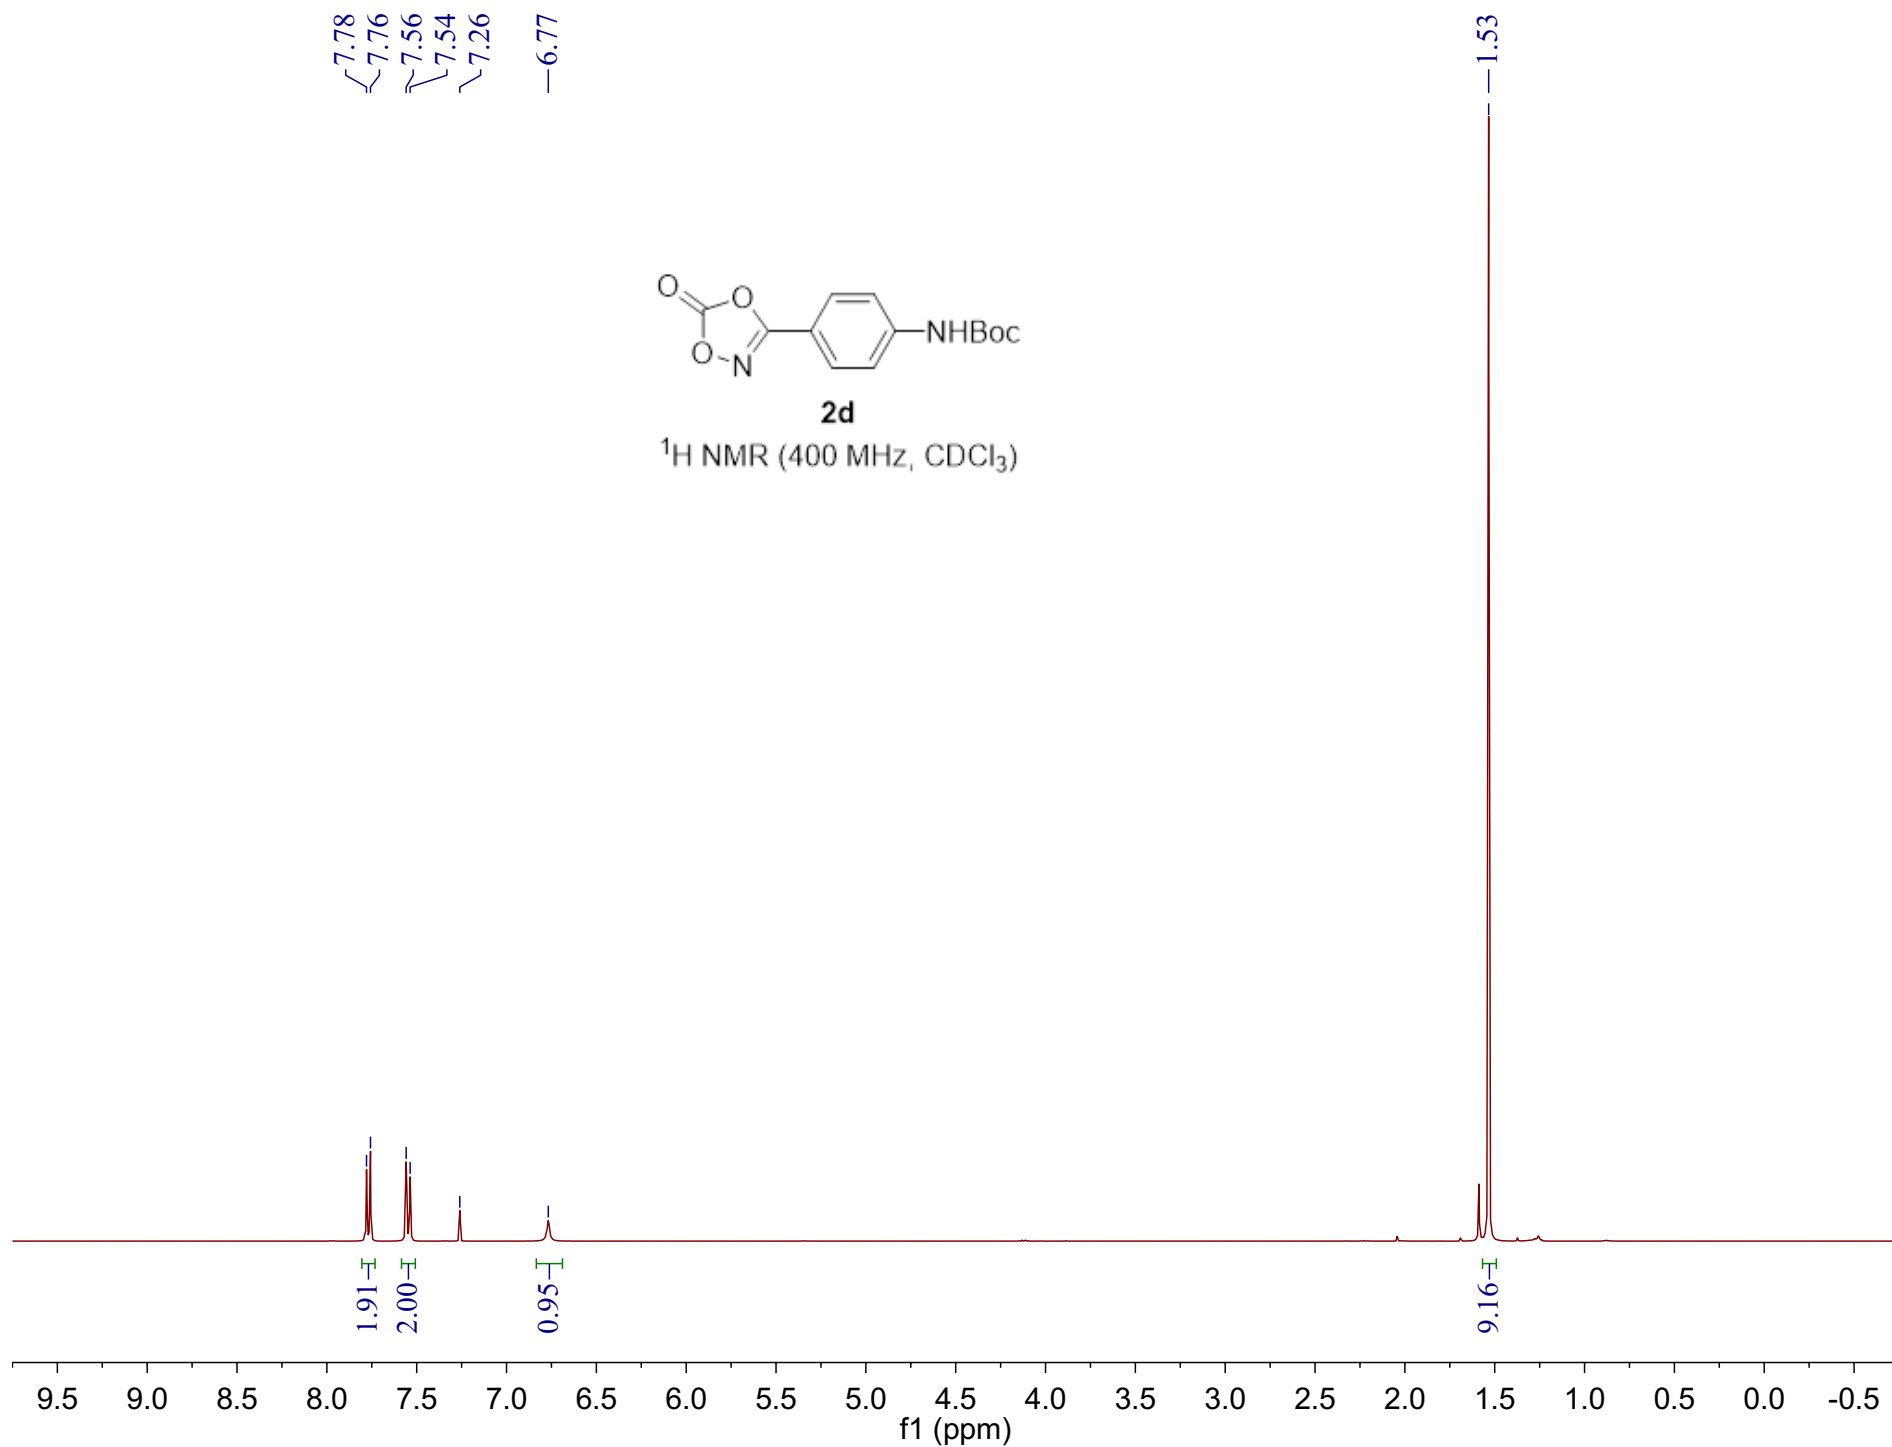

Supplementary Figure 167: <sup>1</sup>H NMR (400 MHz, CDCl<sub>3</sub>) spectrum of **2d**.

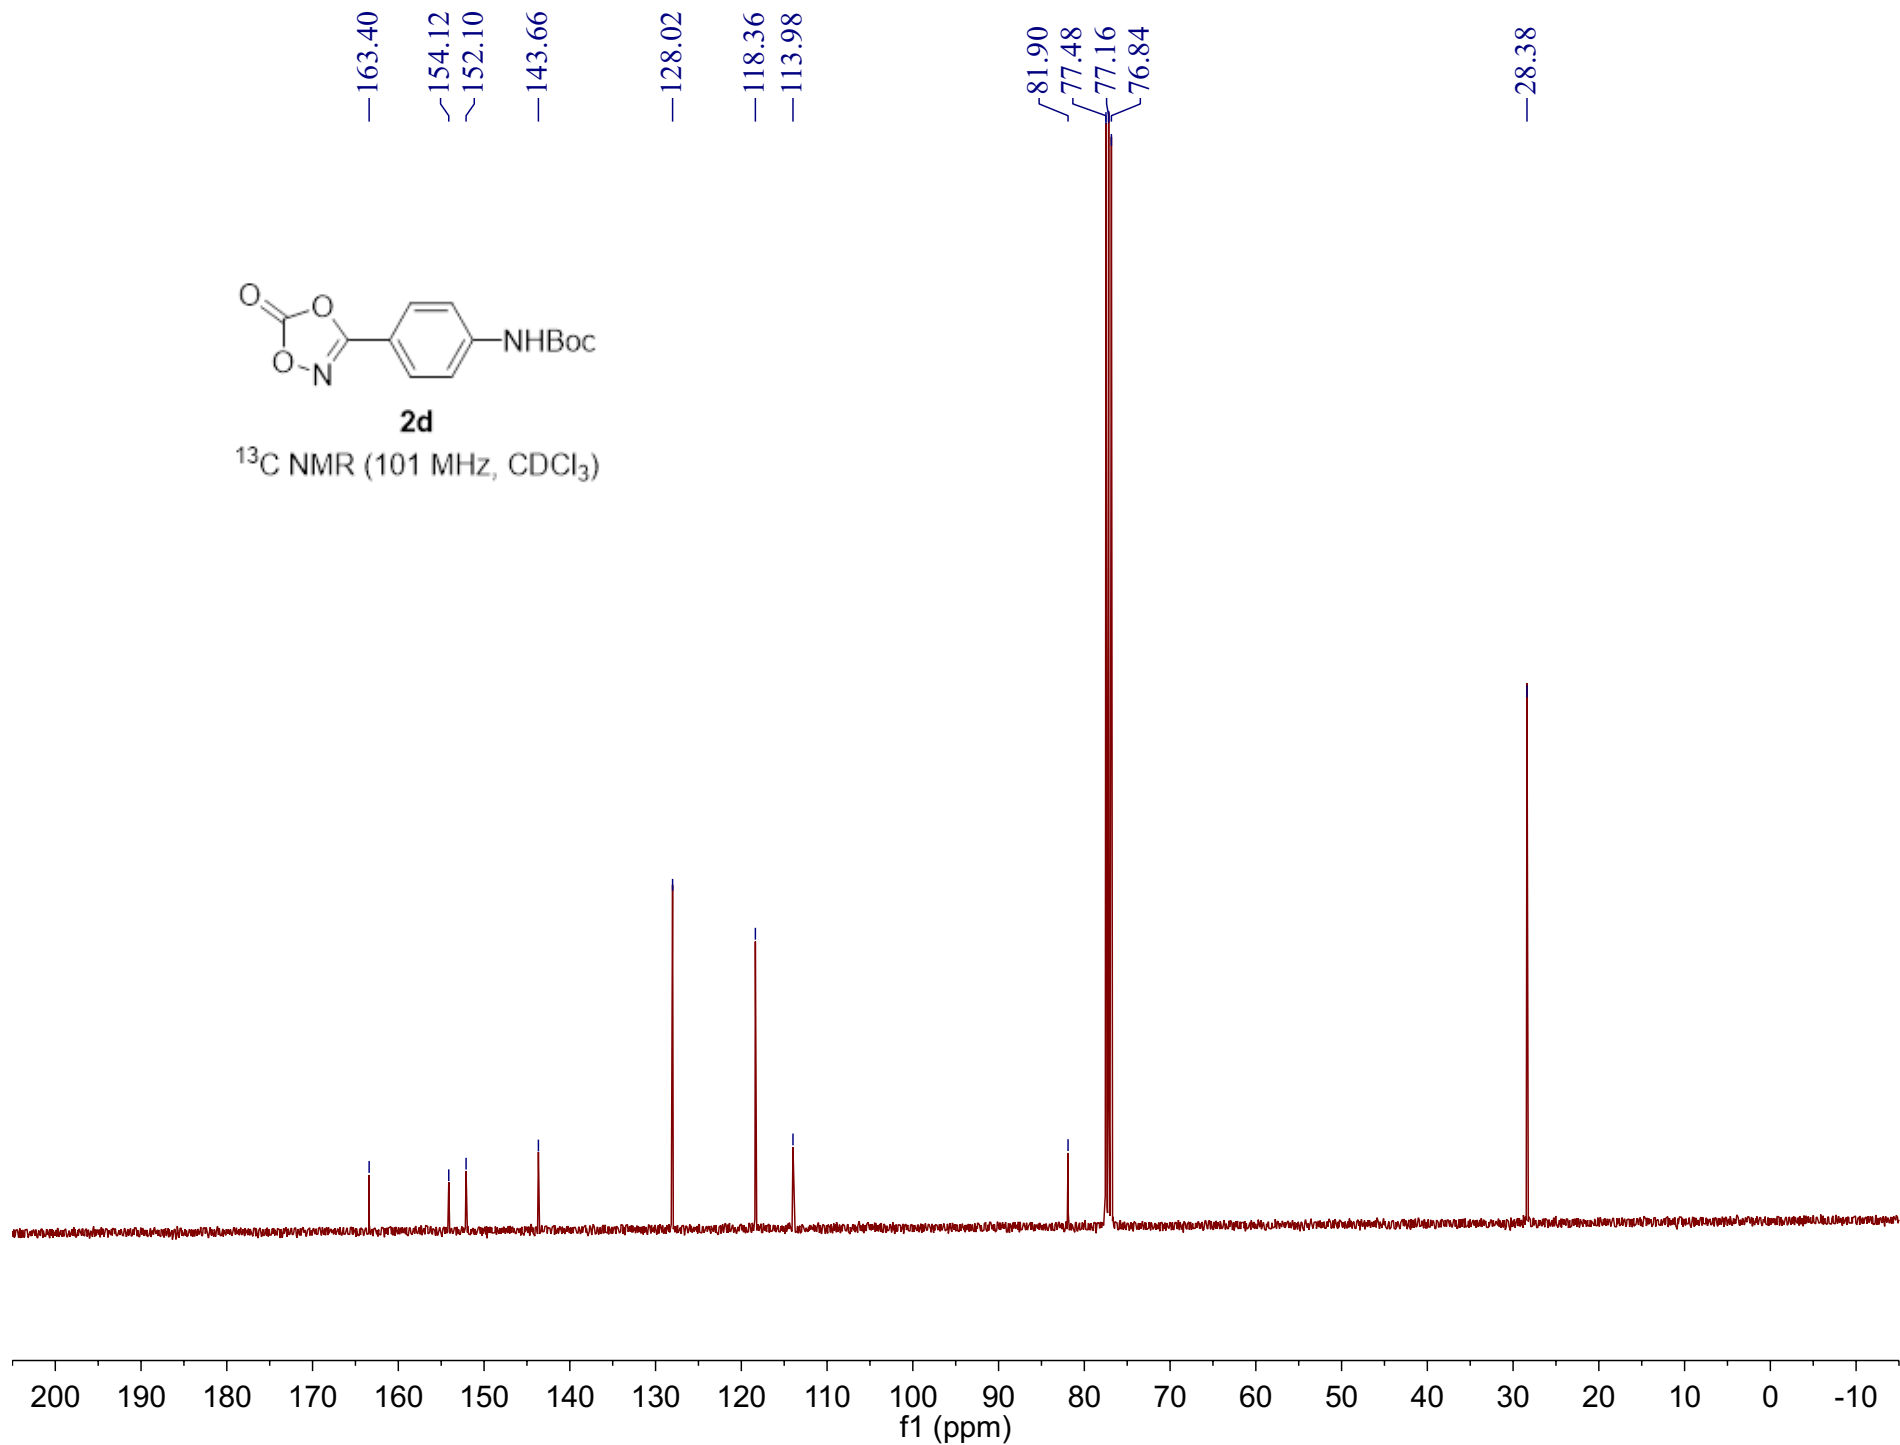

Supplementary Figure 168:  $^{13}\text{C}$  NMR (101 MHz,  $\text{CDCl}_3$ ) spectrum of **2d**.



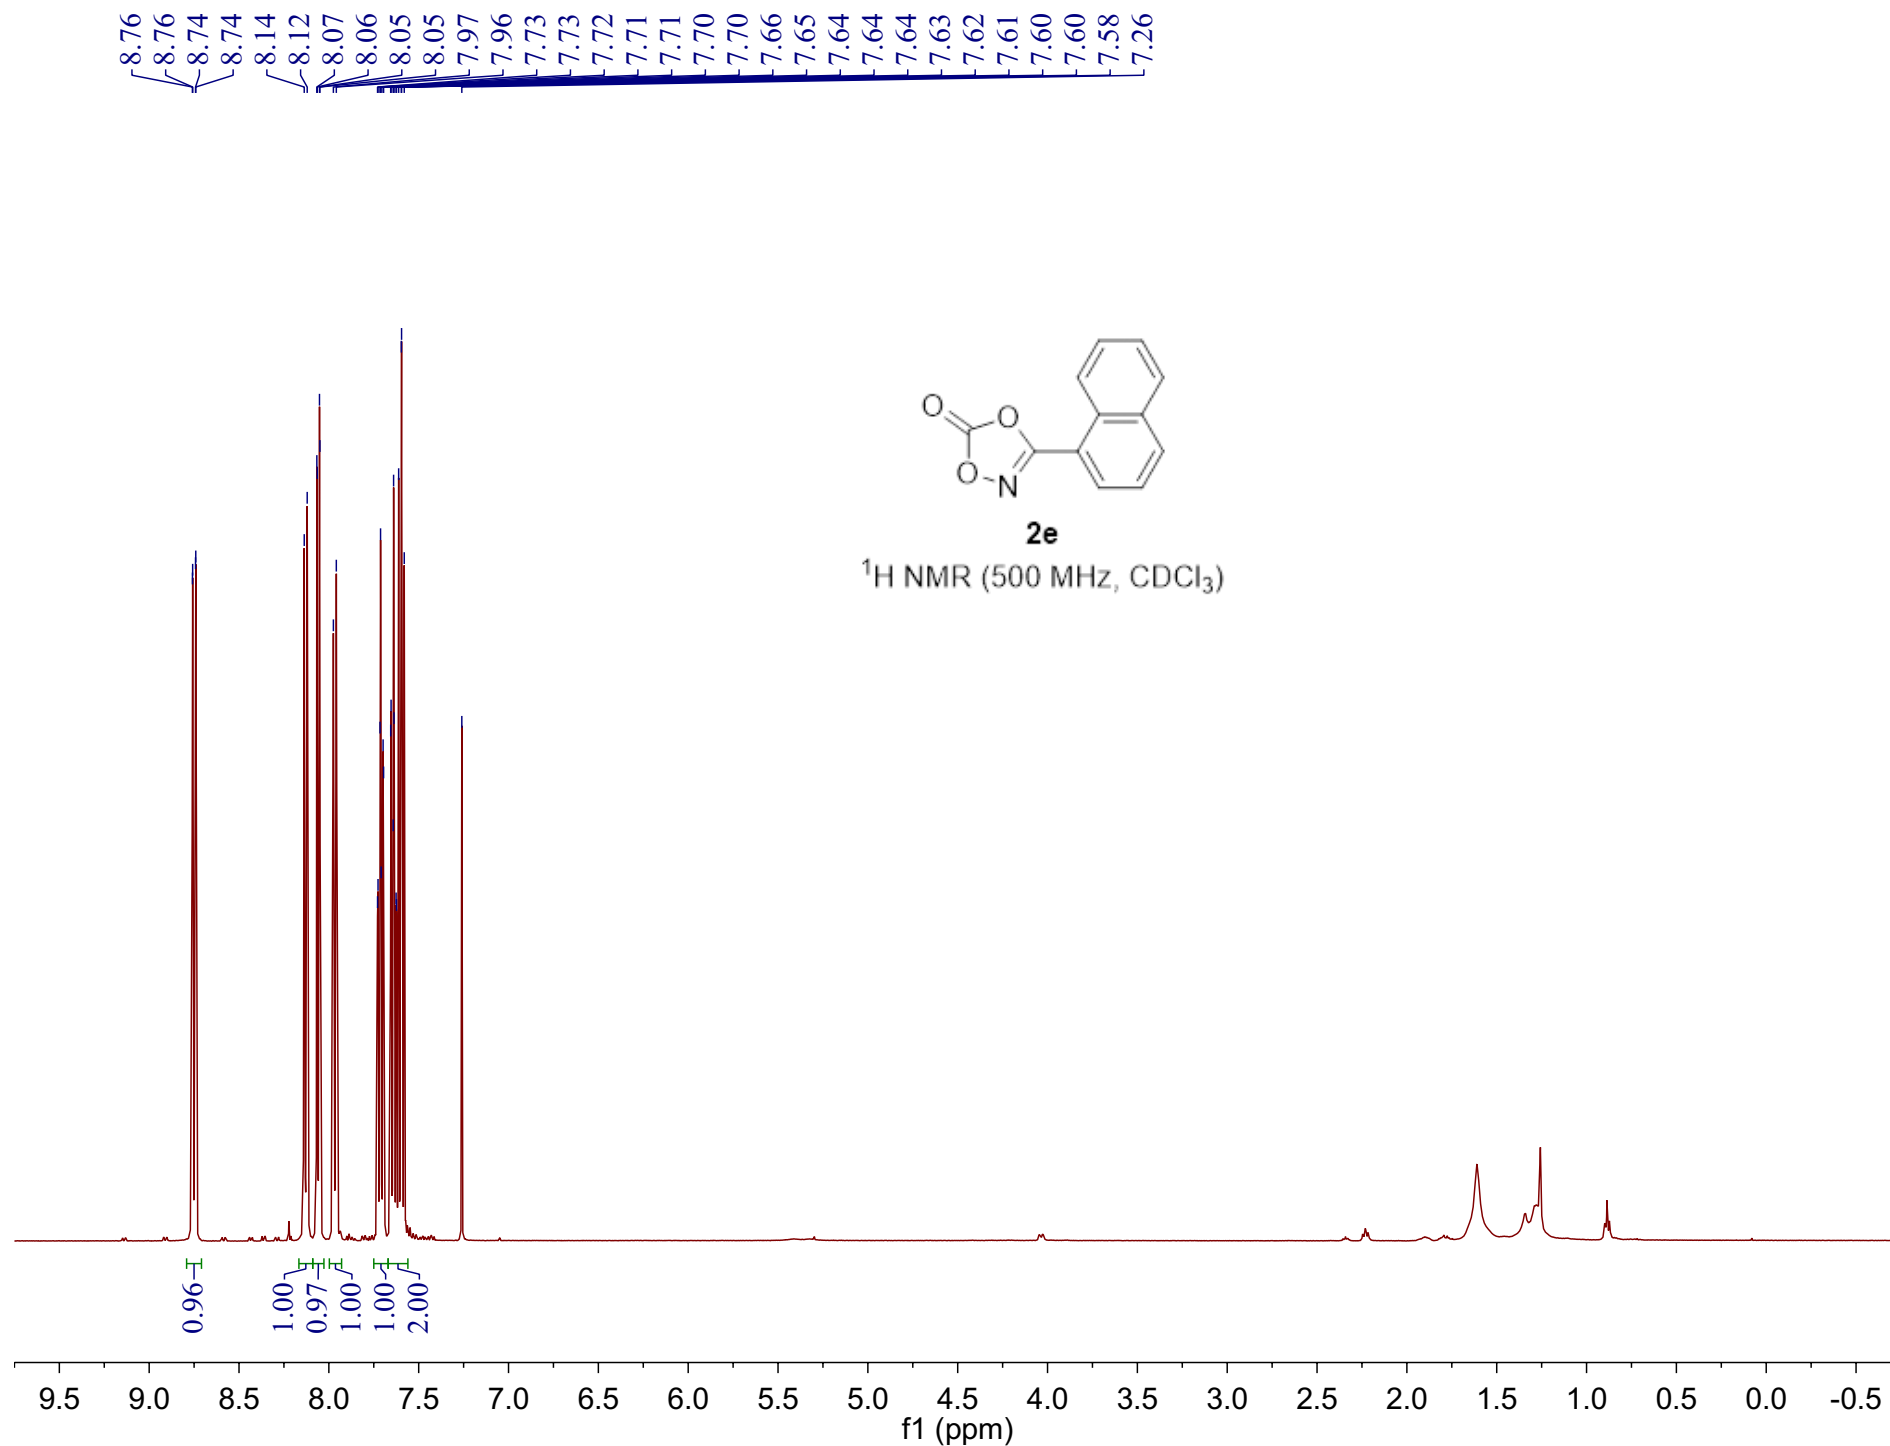

Supplementary Figure 169: <sup>1</sup>H NMR (500 MHz, CDCl<sub>3</sub>) spectrum of **2e**.

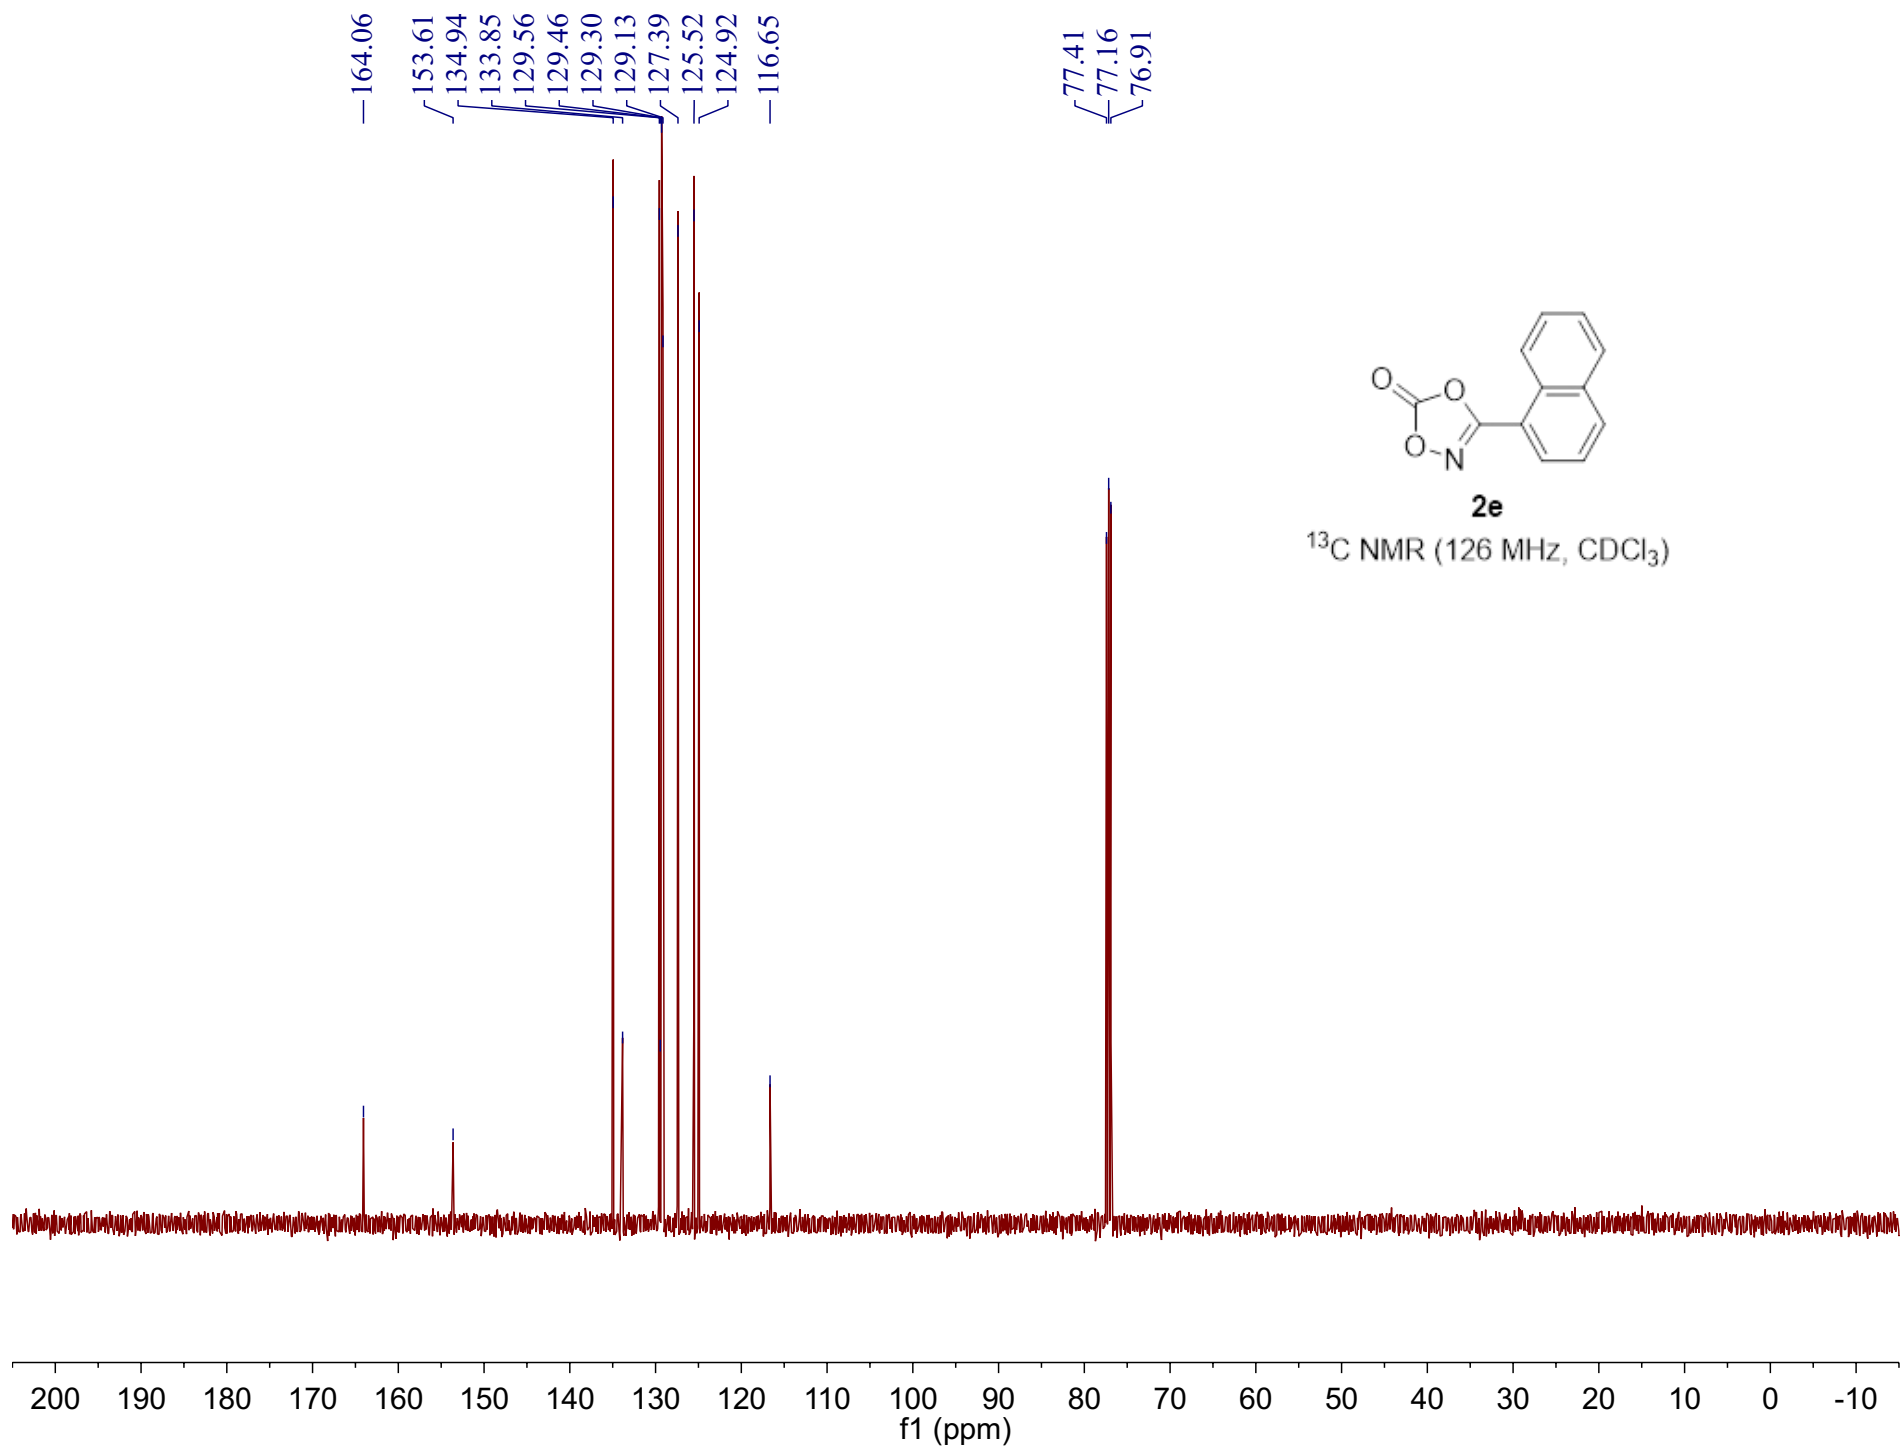

Supplementary Figure 170: <sup>13</sup>C NMR (126 MHz, CDCl<sub>3</sub>) spectrum of **2e**.

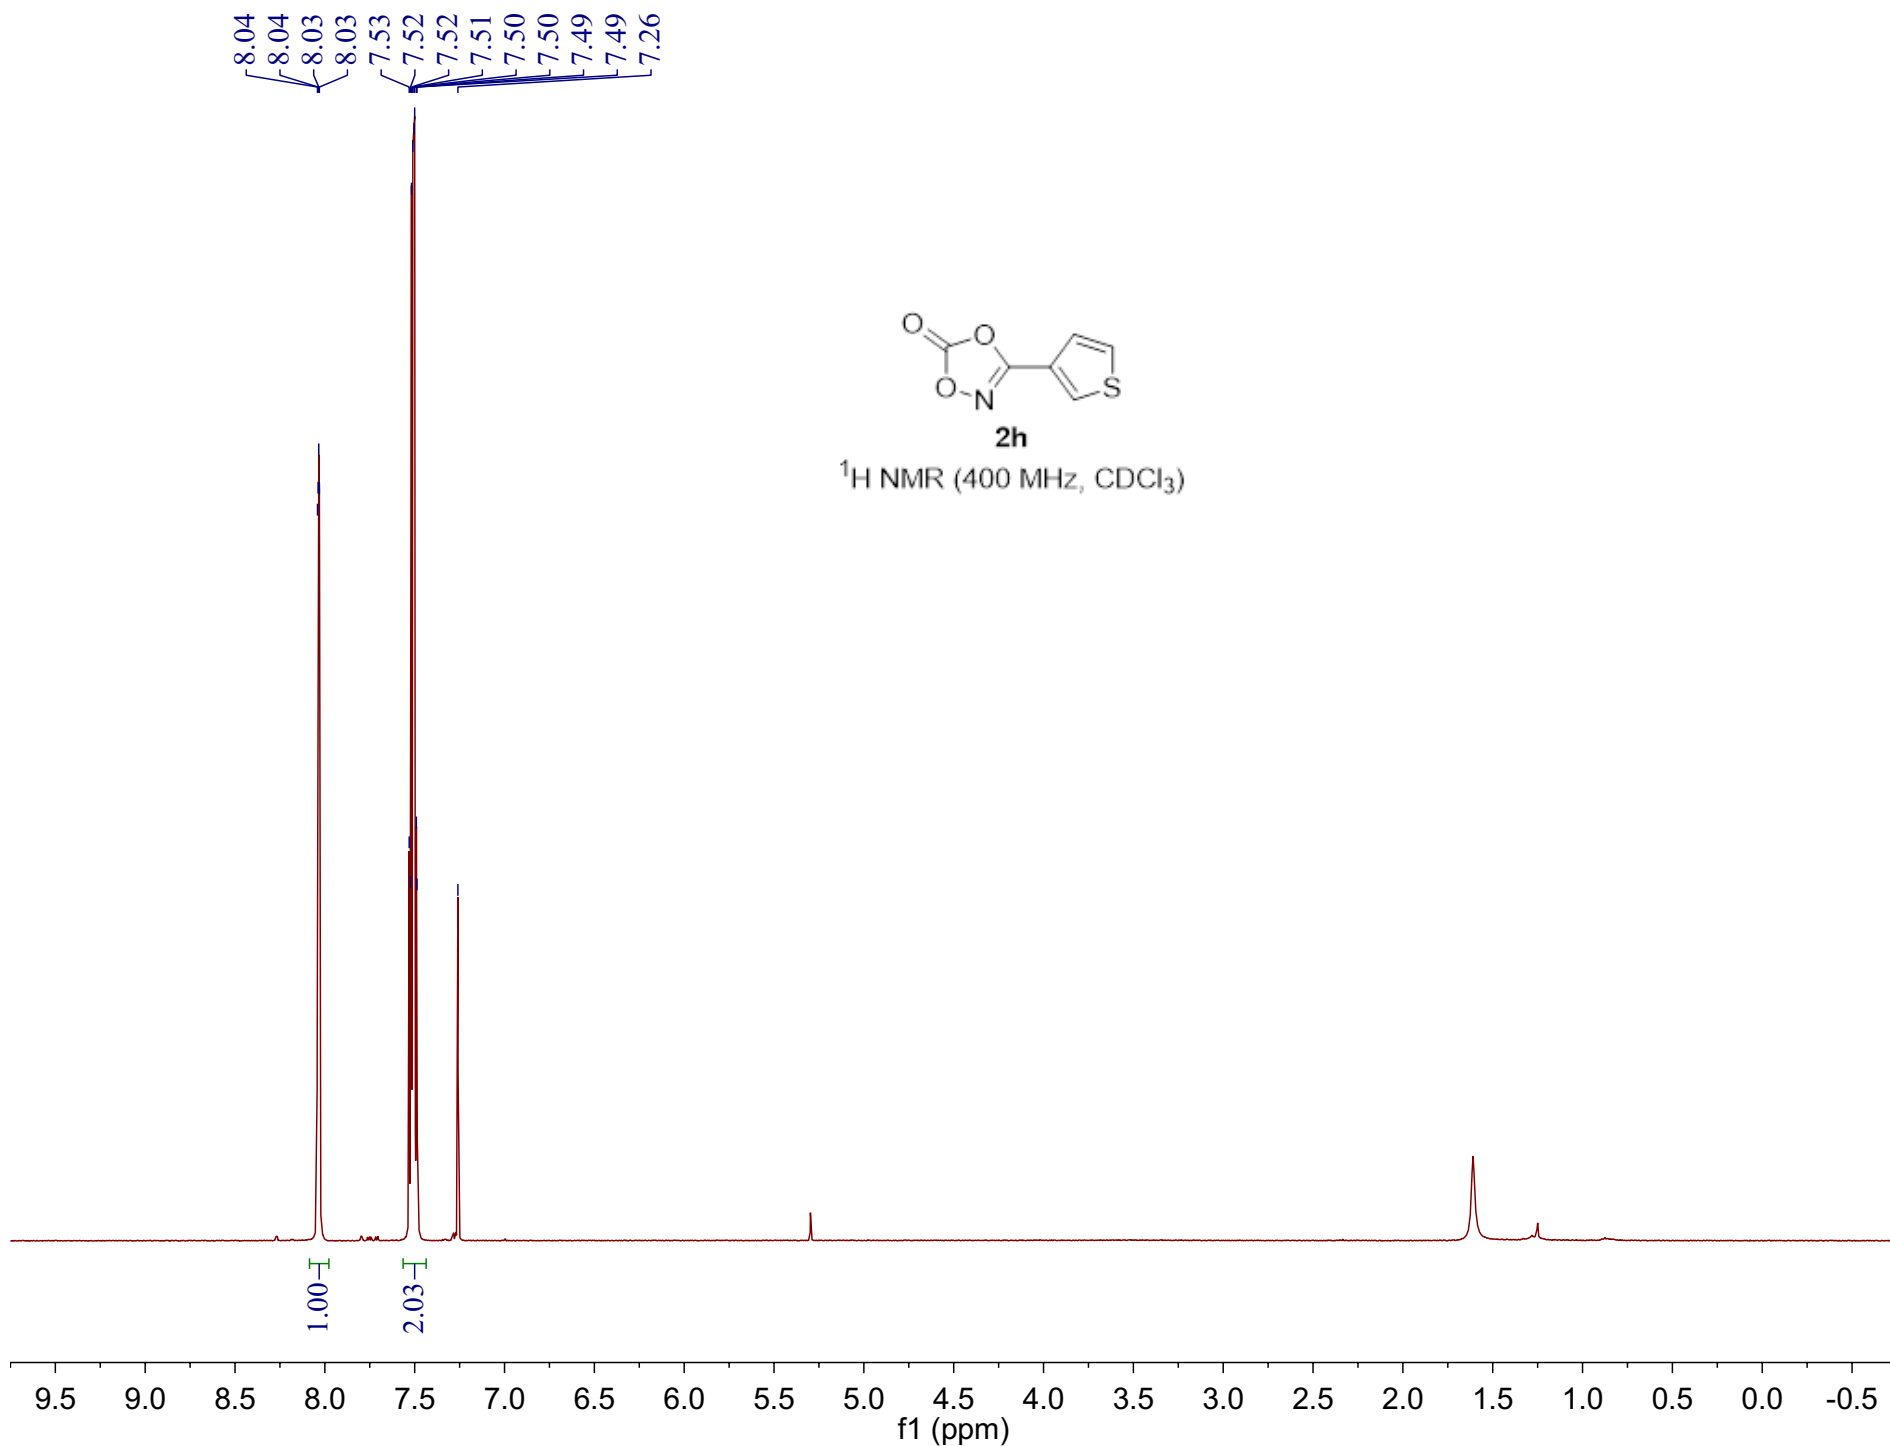

Supplementary Figure 171: <sup>1</sup>H NMR (400 MHz, CDCl<sub>3</sub>) spectrum of **2h**.

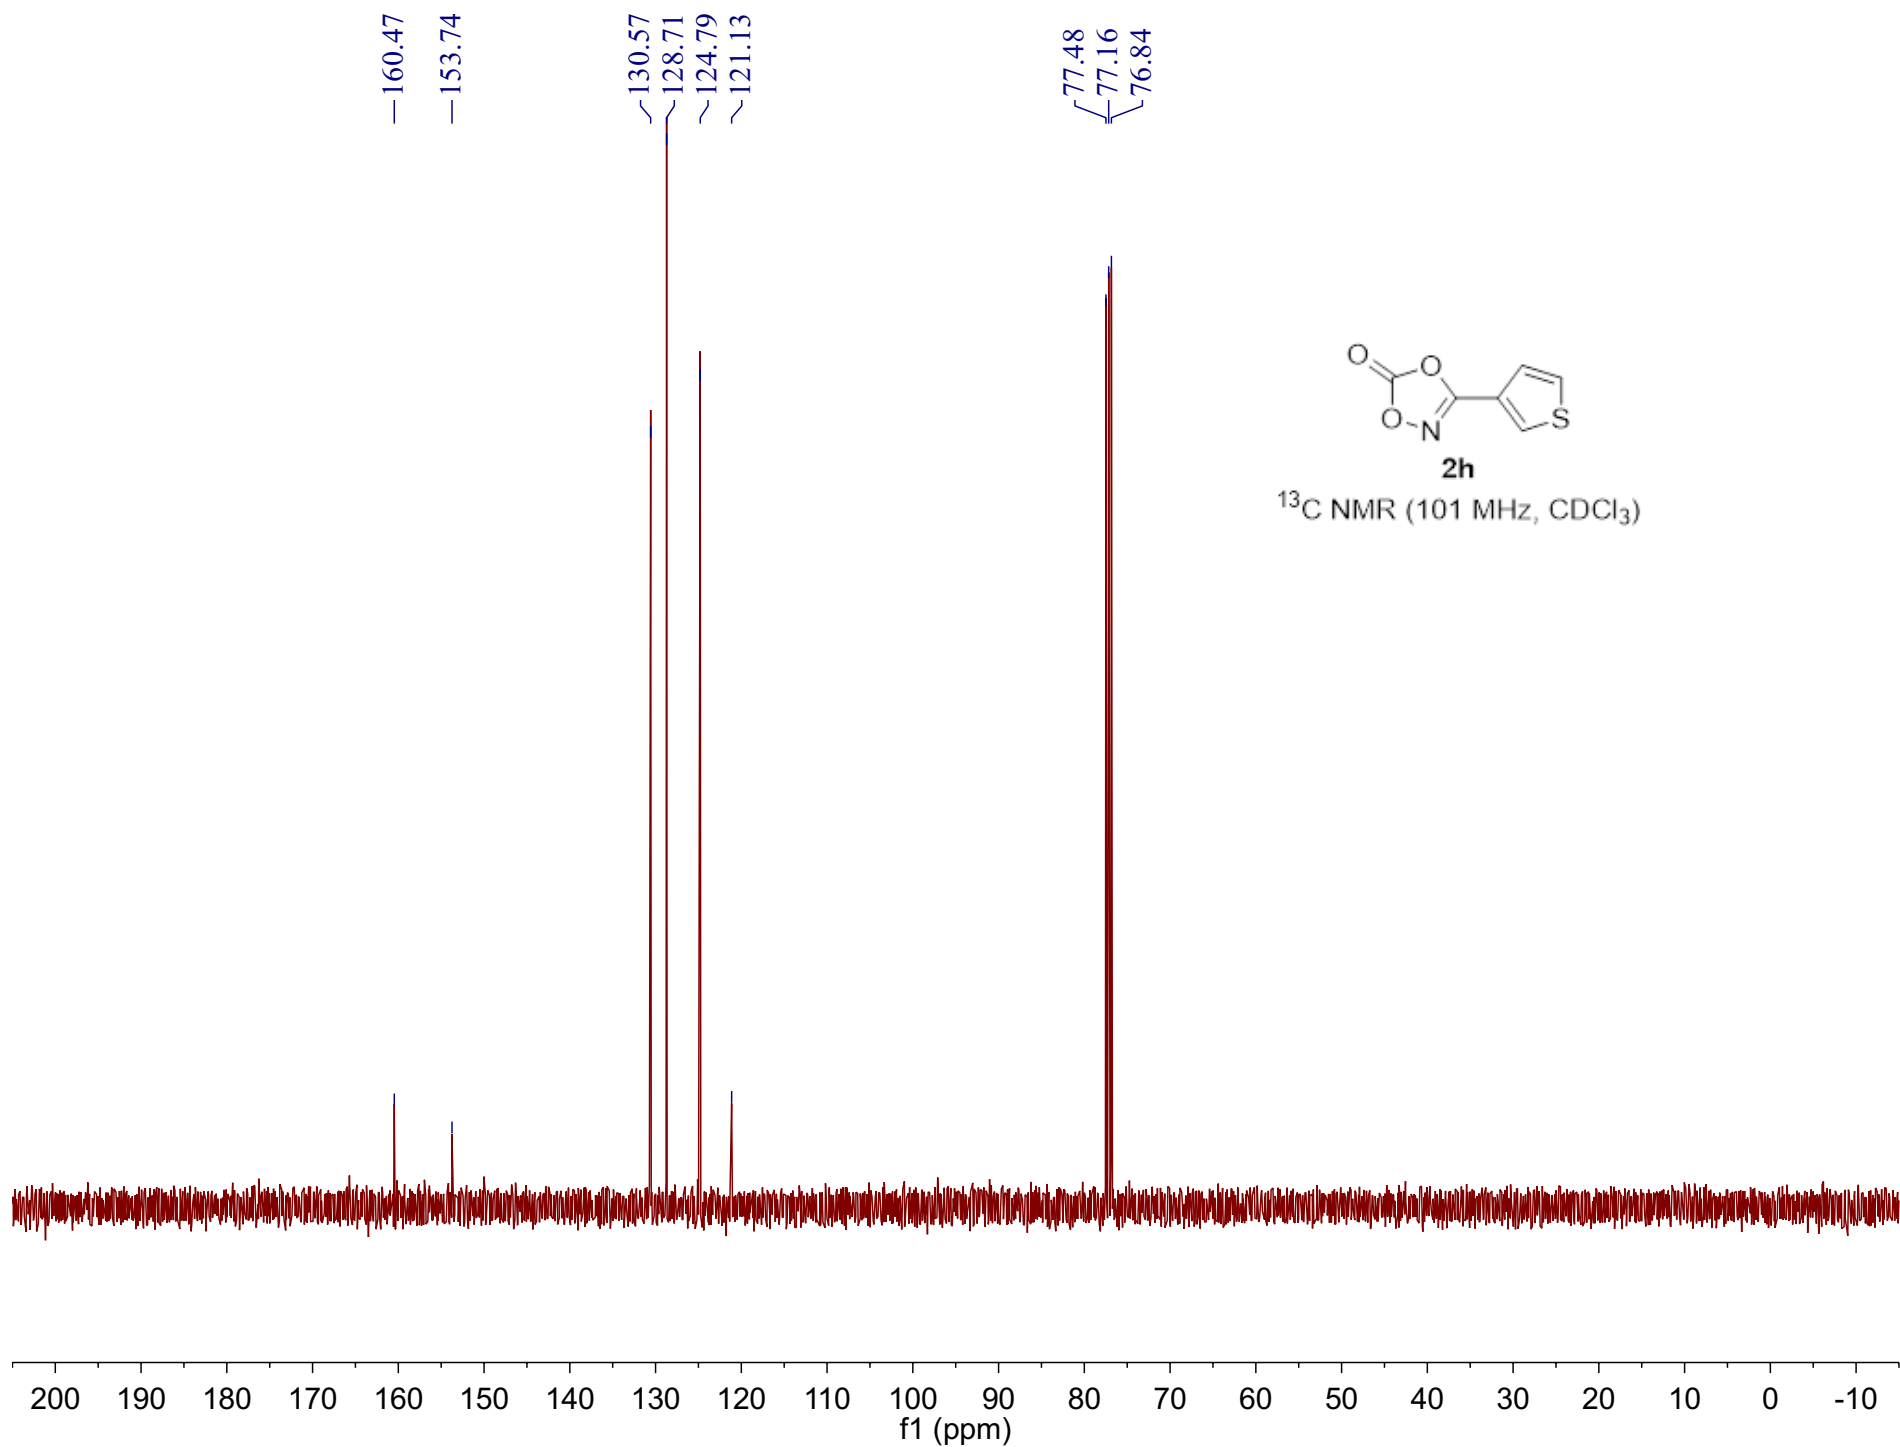

Supplementary Figure 172: <sup>13</sup>C NMR (101 MHz, CDCl<sub>3</sub>) spectrum of **2h**.

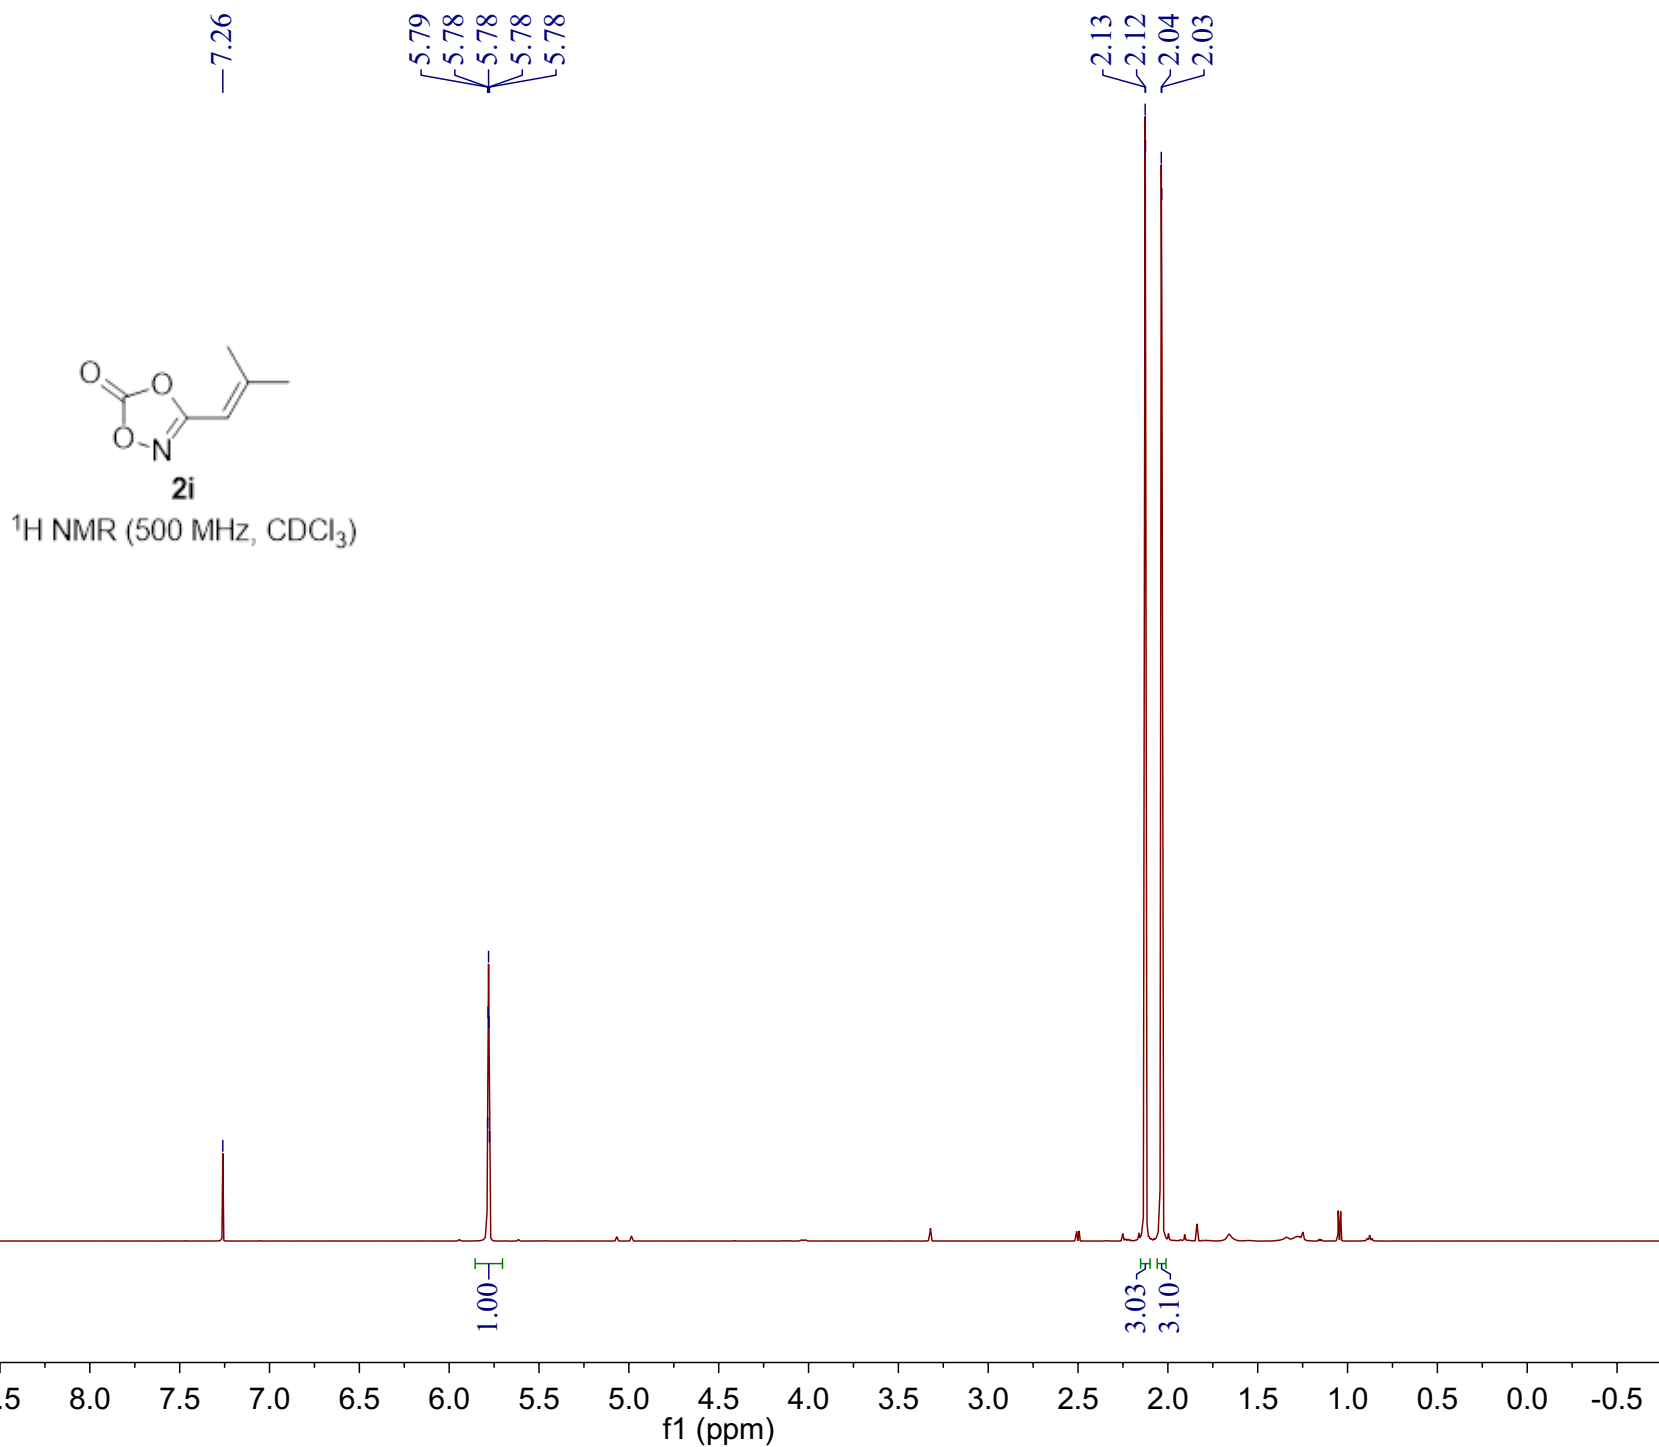

Supplementary Figure 173: <sup>1</sup>H NMR (500 MHz, CDCl<sub>3</sub>) spectrum of **2i**.

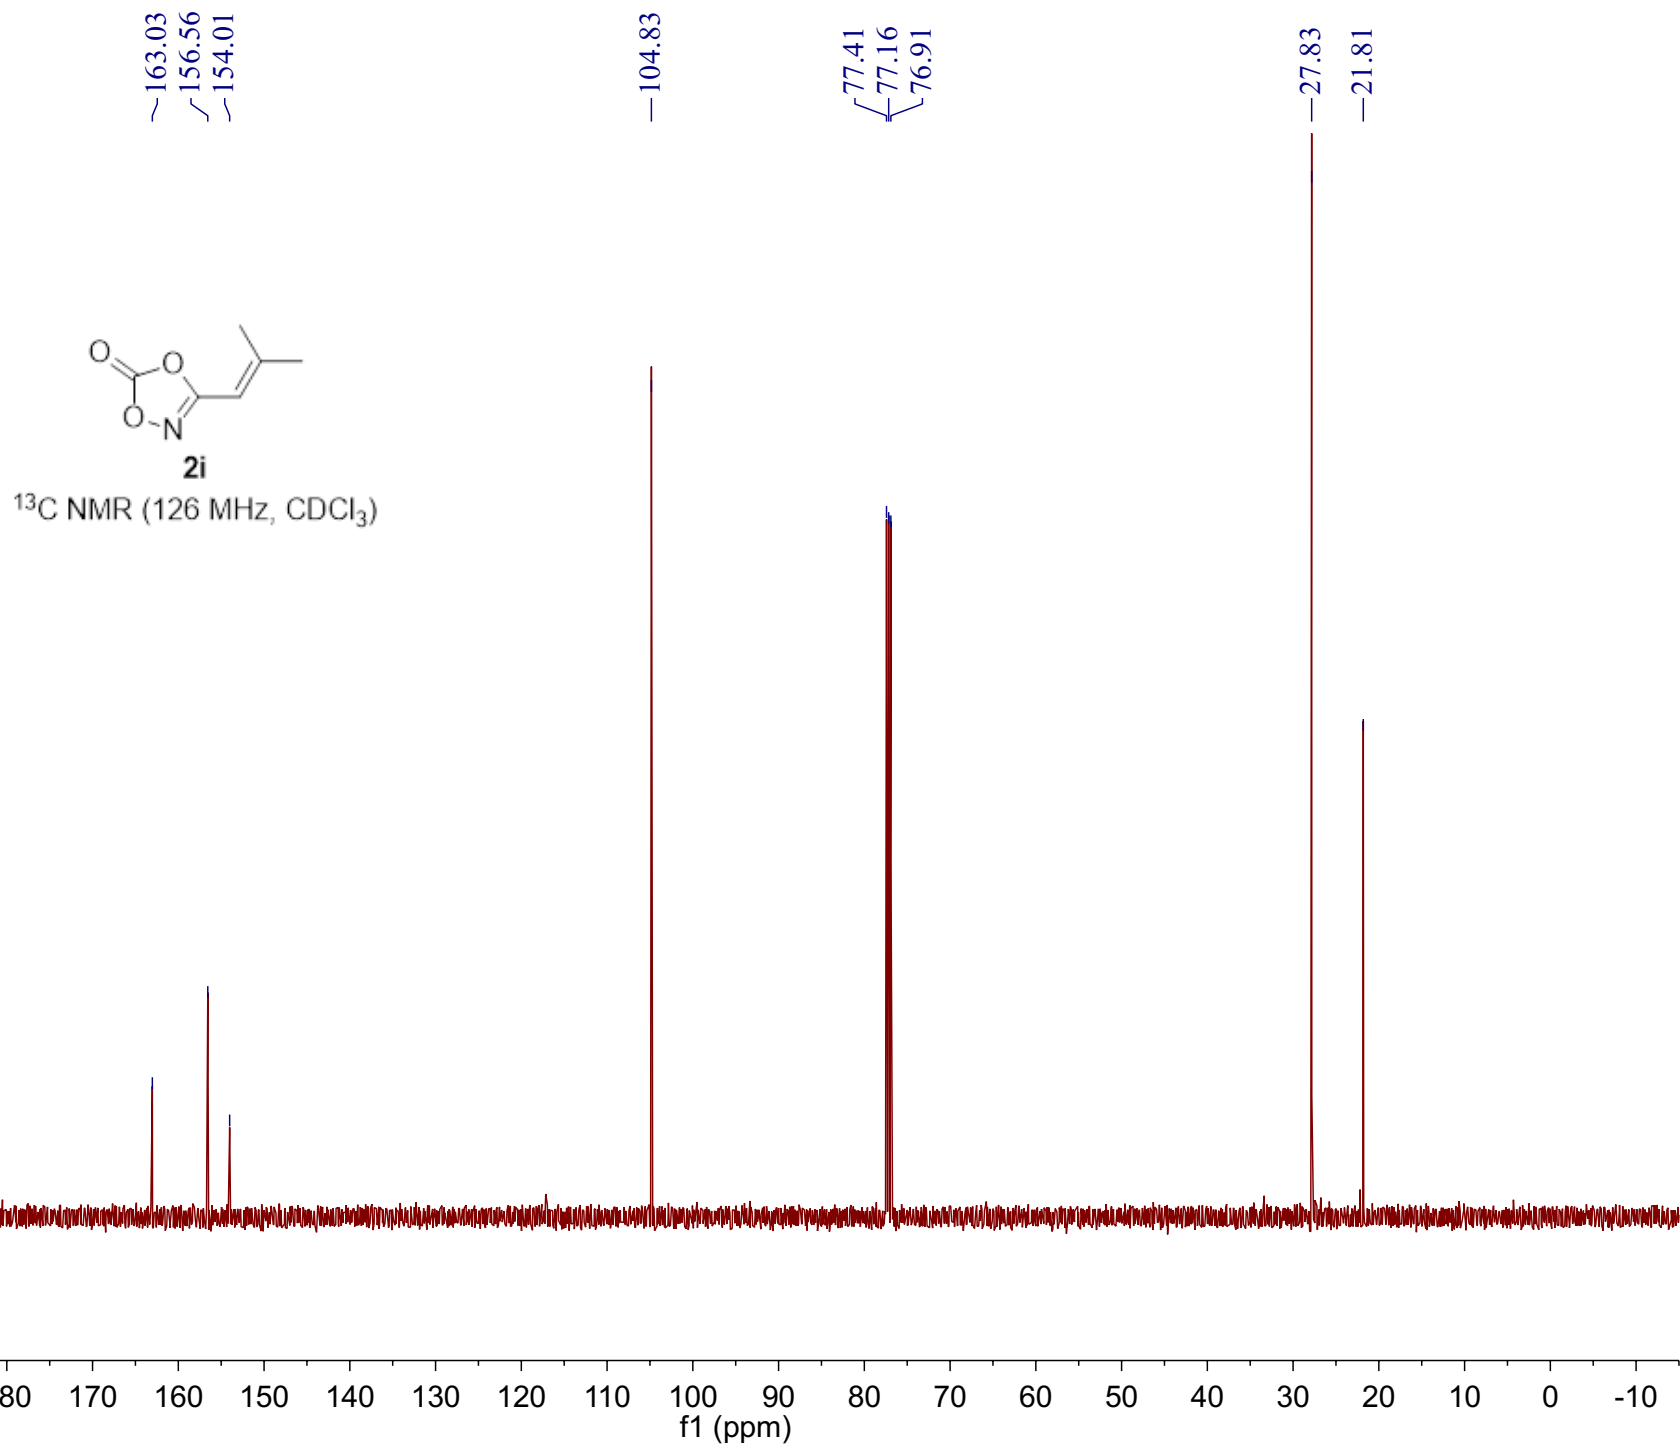

Supplementary Figure 174: <sup>13</sup>C NMR (126 MHz, CDCl<sub>3</sub>) spectrum of **2i**.

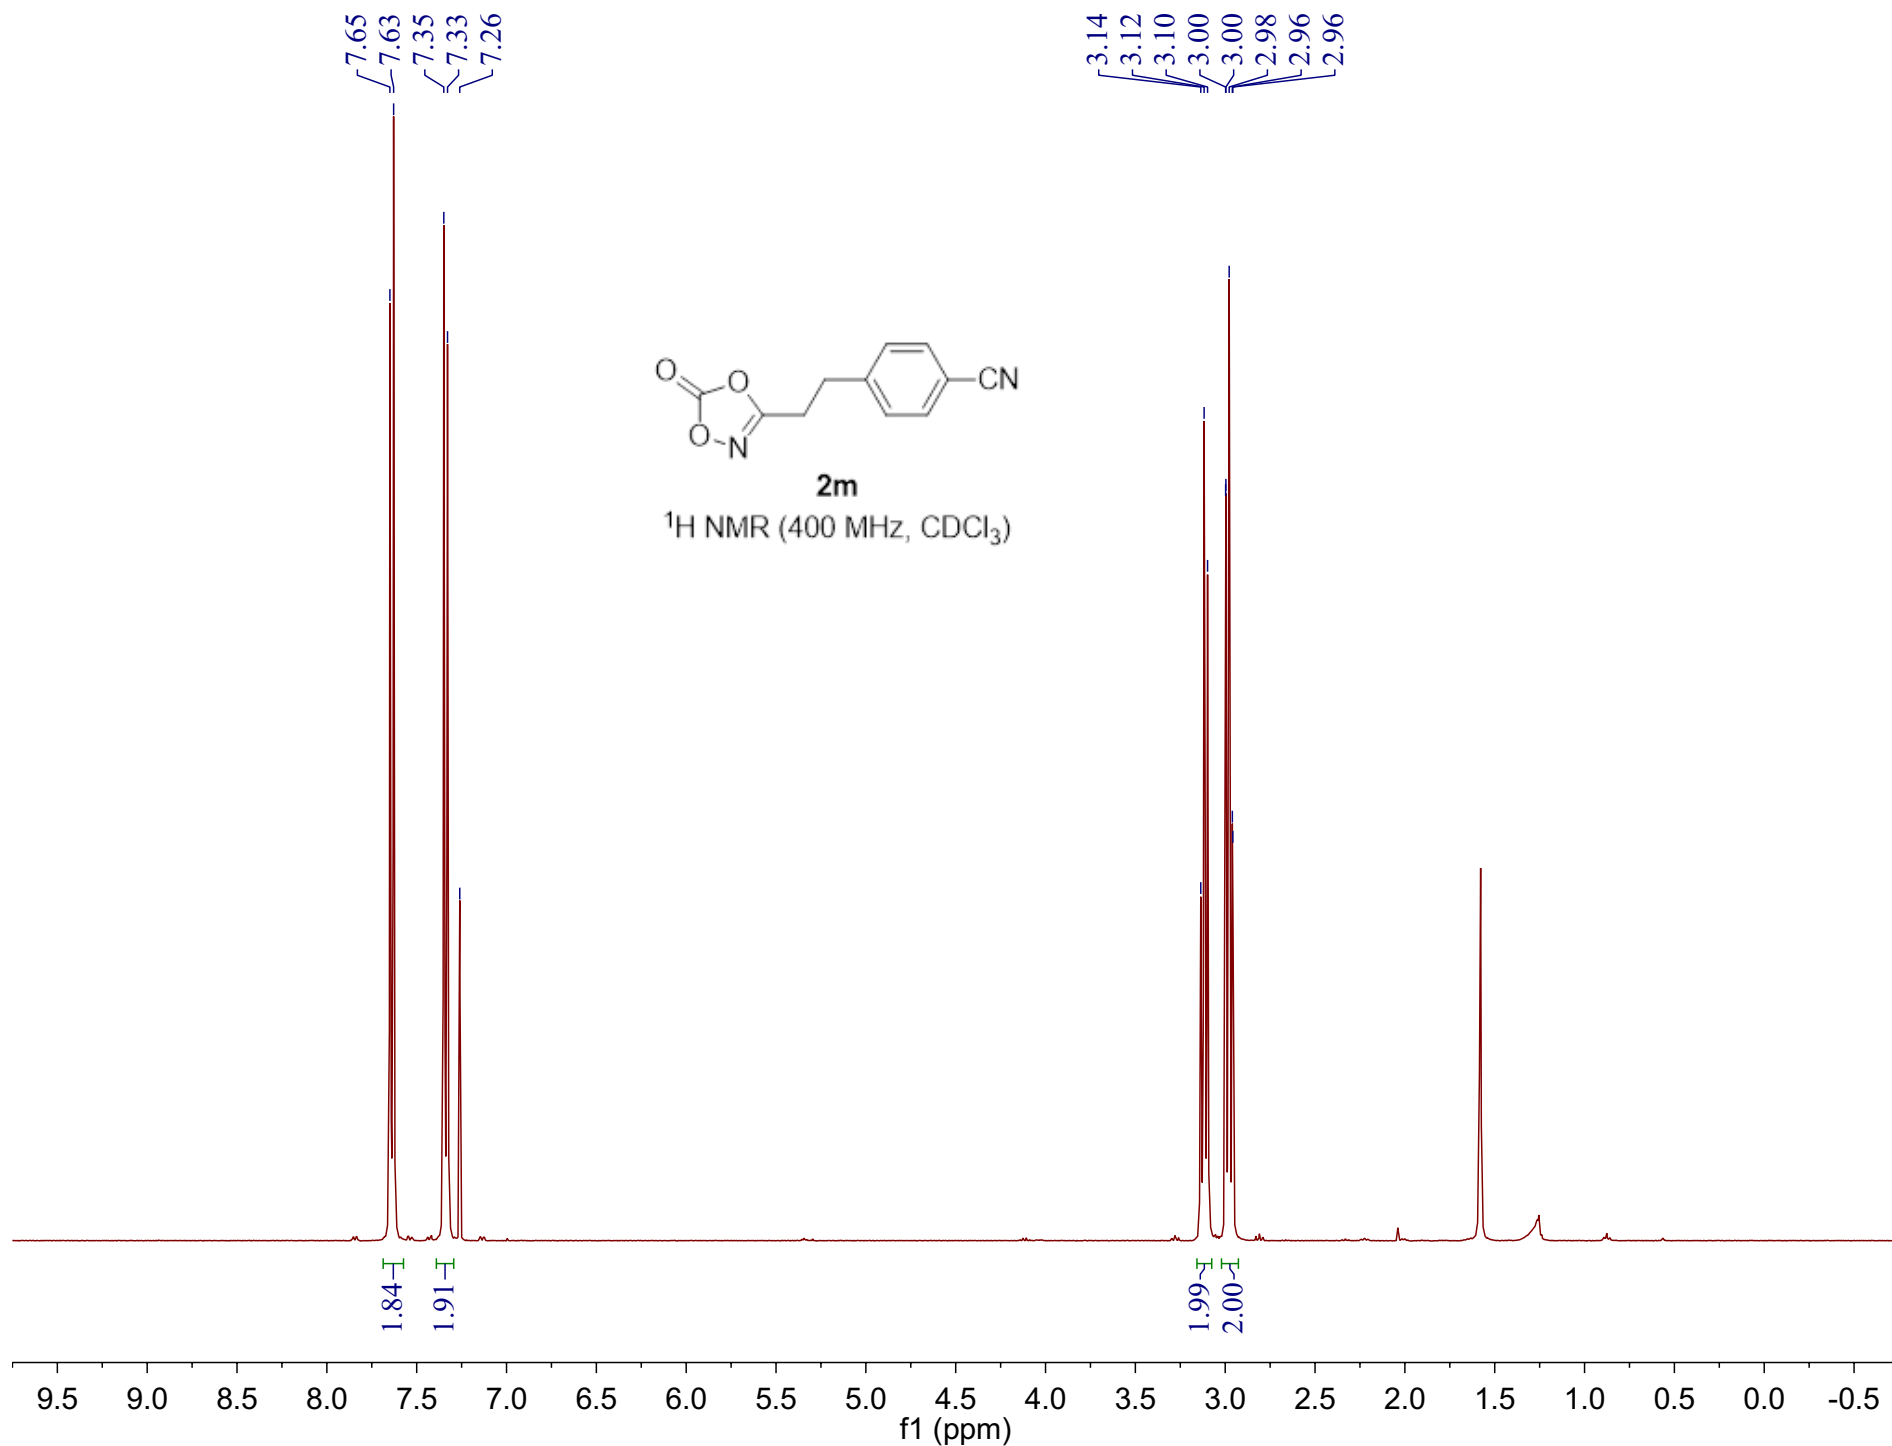

Supplementary Figure 175: <sup>1</sup>H NMR (400 MHz, CDCl<sub>3</sub>) spectrum of **2m**.

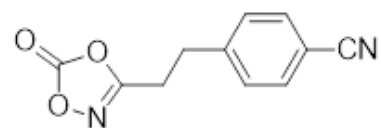

**2m**

$^{13}\text{C}$  NMR (101 MHz,  $\text{CDCl}_3$ )

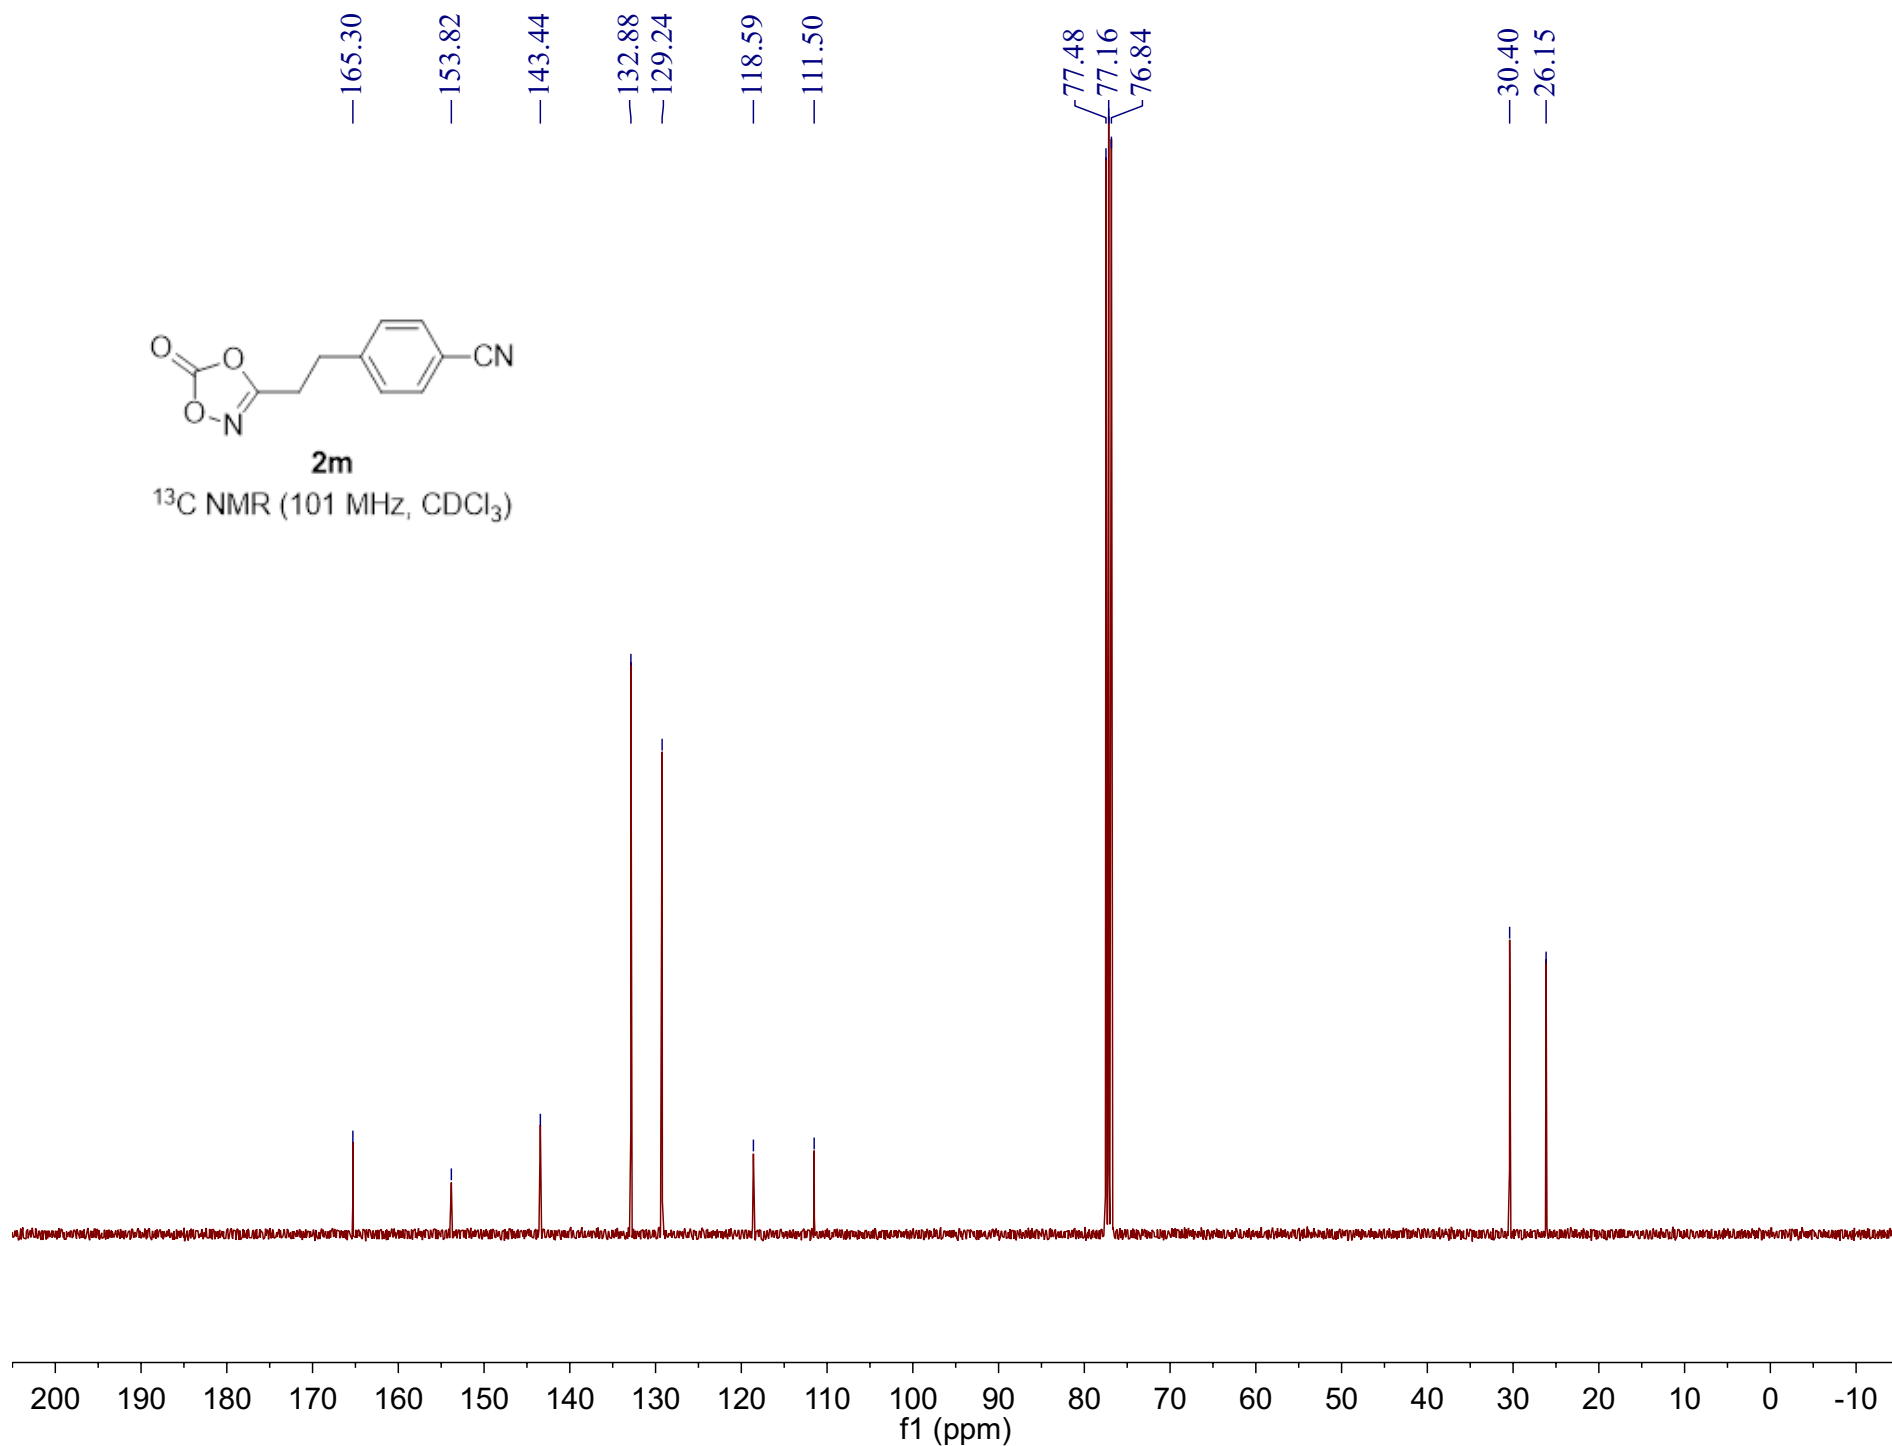

Supplementary Figure 176:  $^{13}\text{C}$  NMR (101 MHz,  $\text{CDCl}_3$ ) spectrum of **2m**.



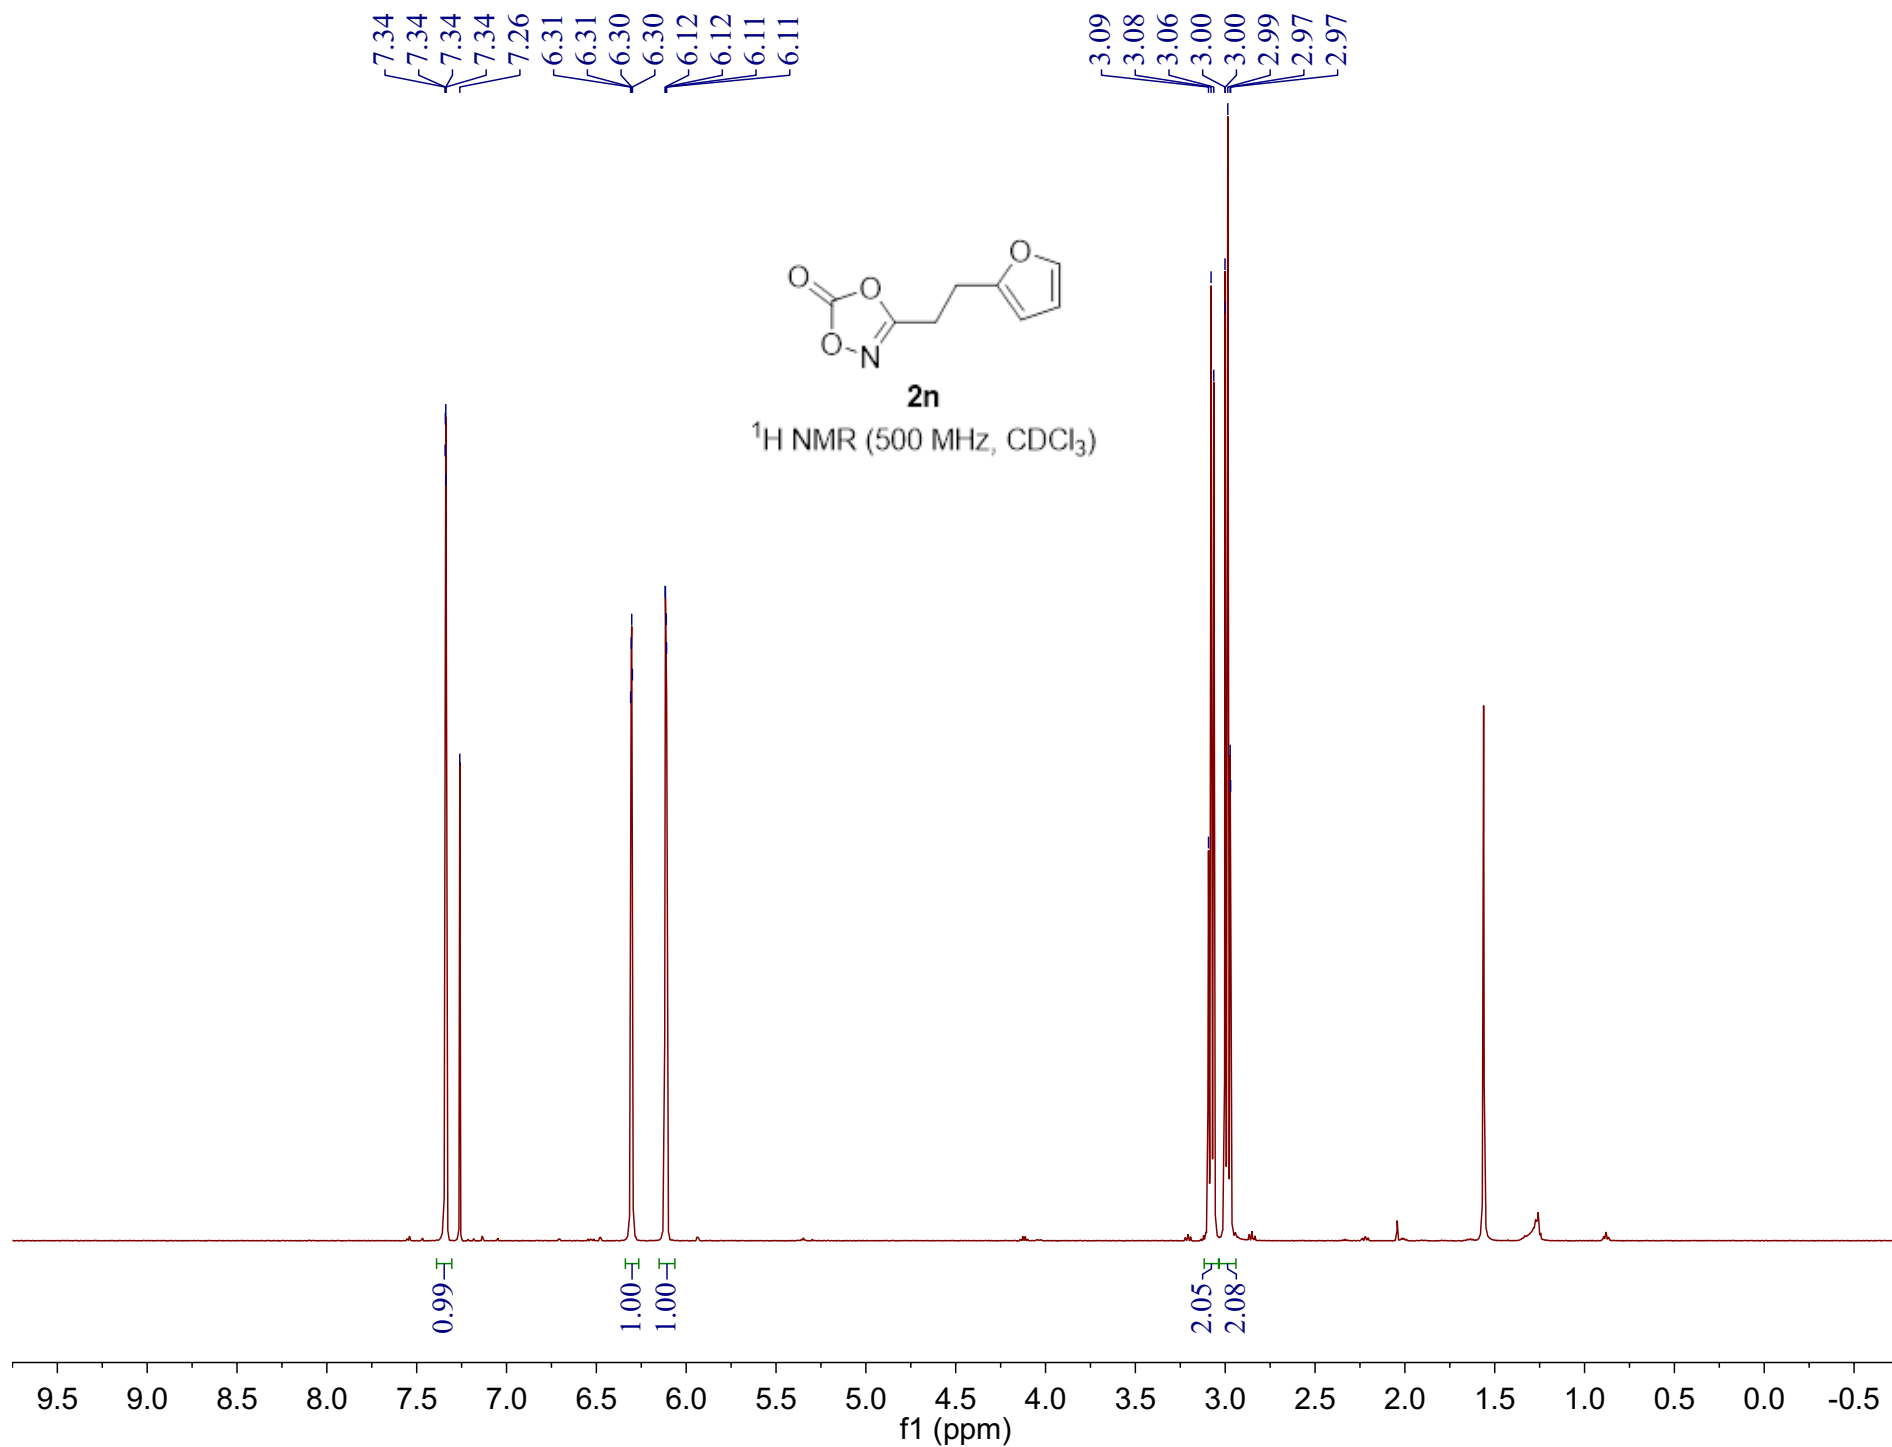

Supplementary Figure 177: <sup>1</sup>H NMR (500 MHz, CDCl<sub>3</sub>) spectrum of **2n**.

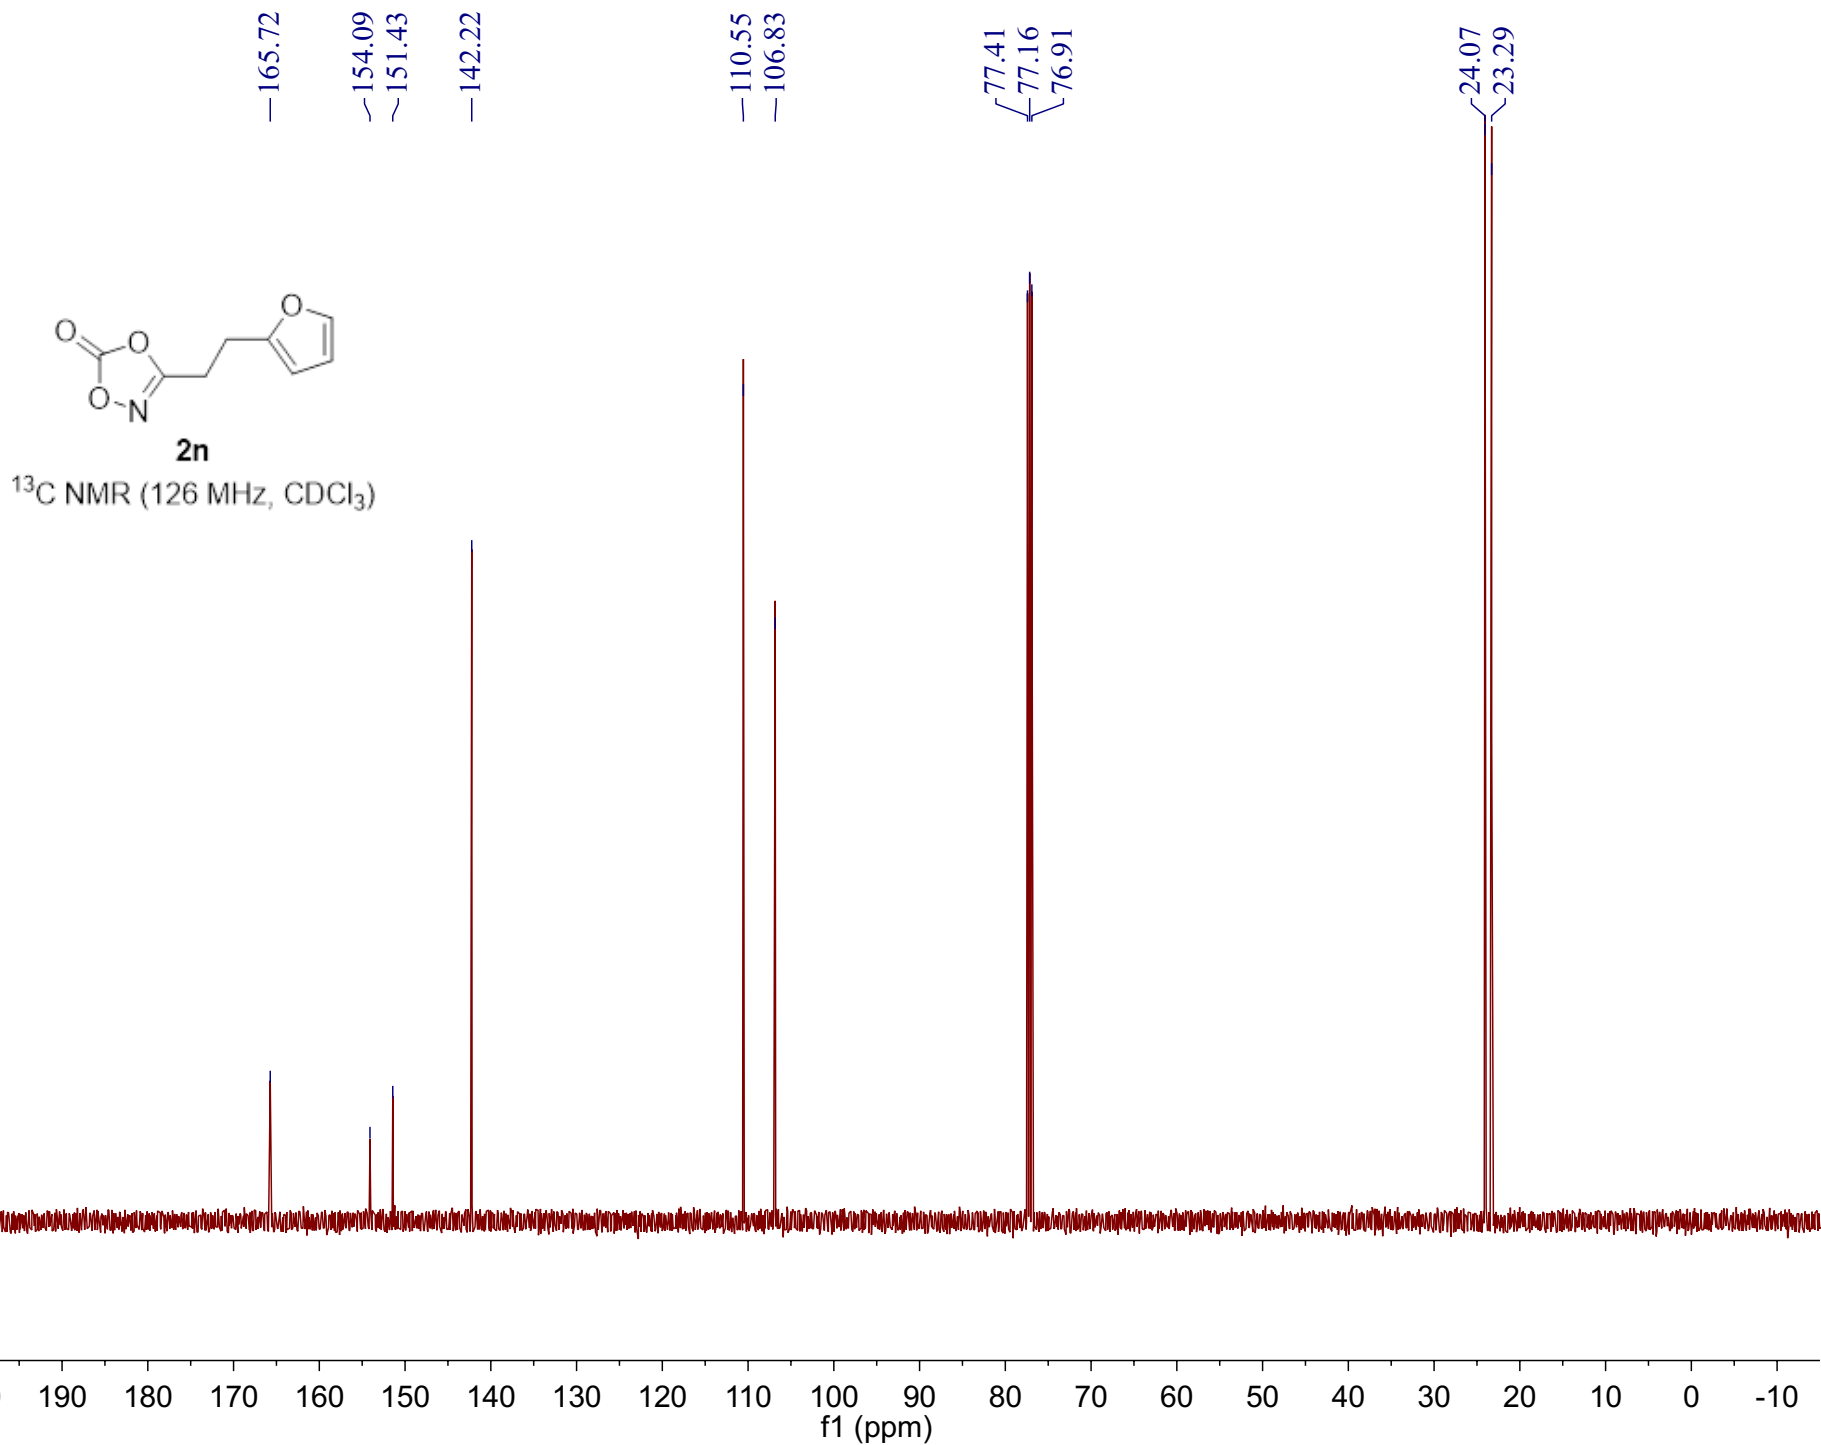

Supplementary Figure 178: <sup>13</sup>C NMR (126 MHz, CDCl<sub>3</sub>) spectrum of **2n**.

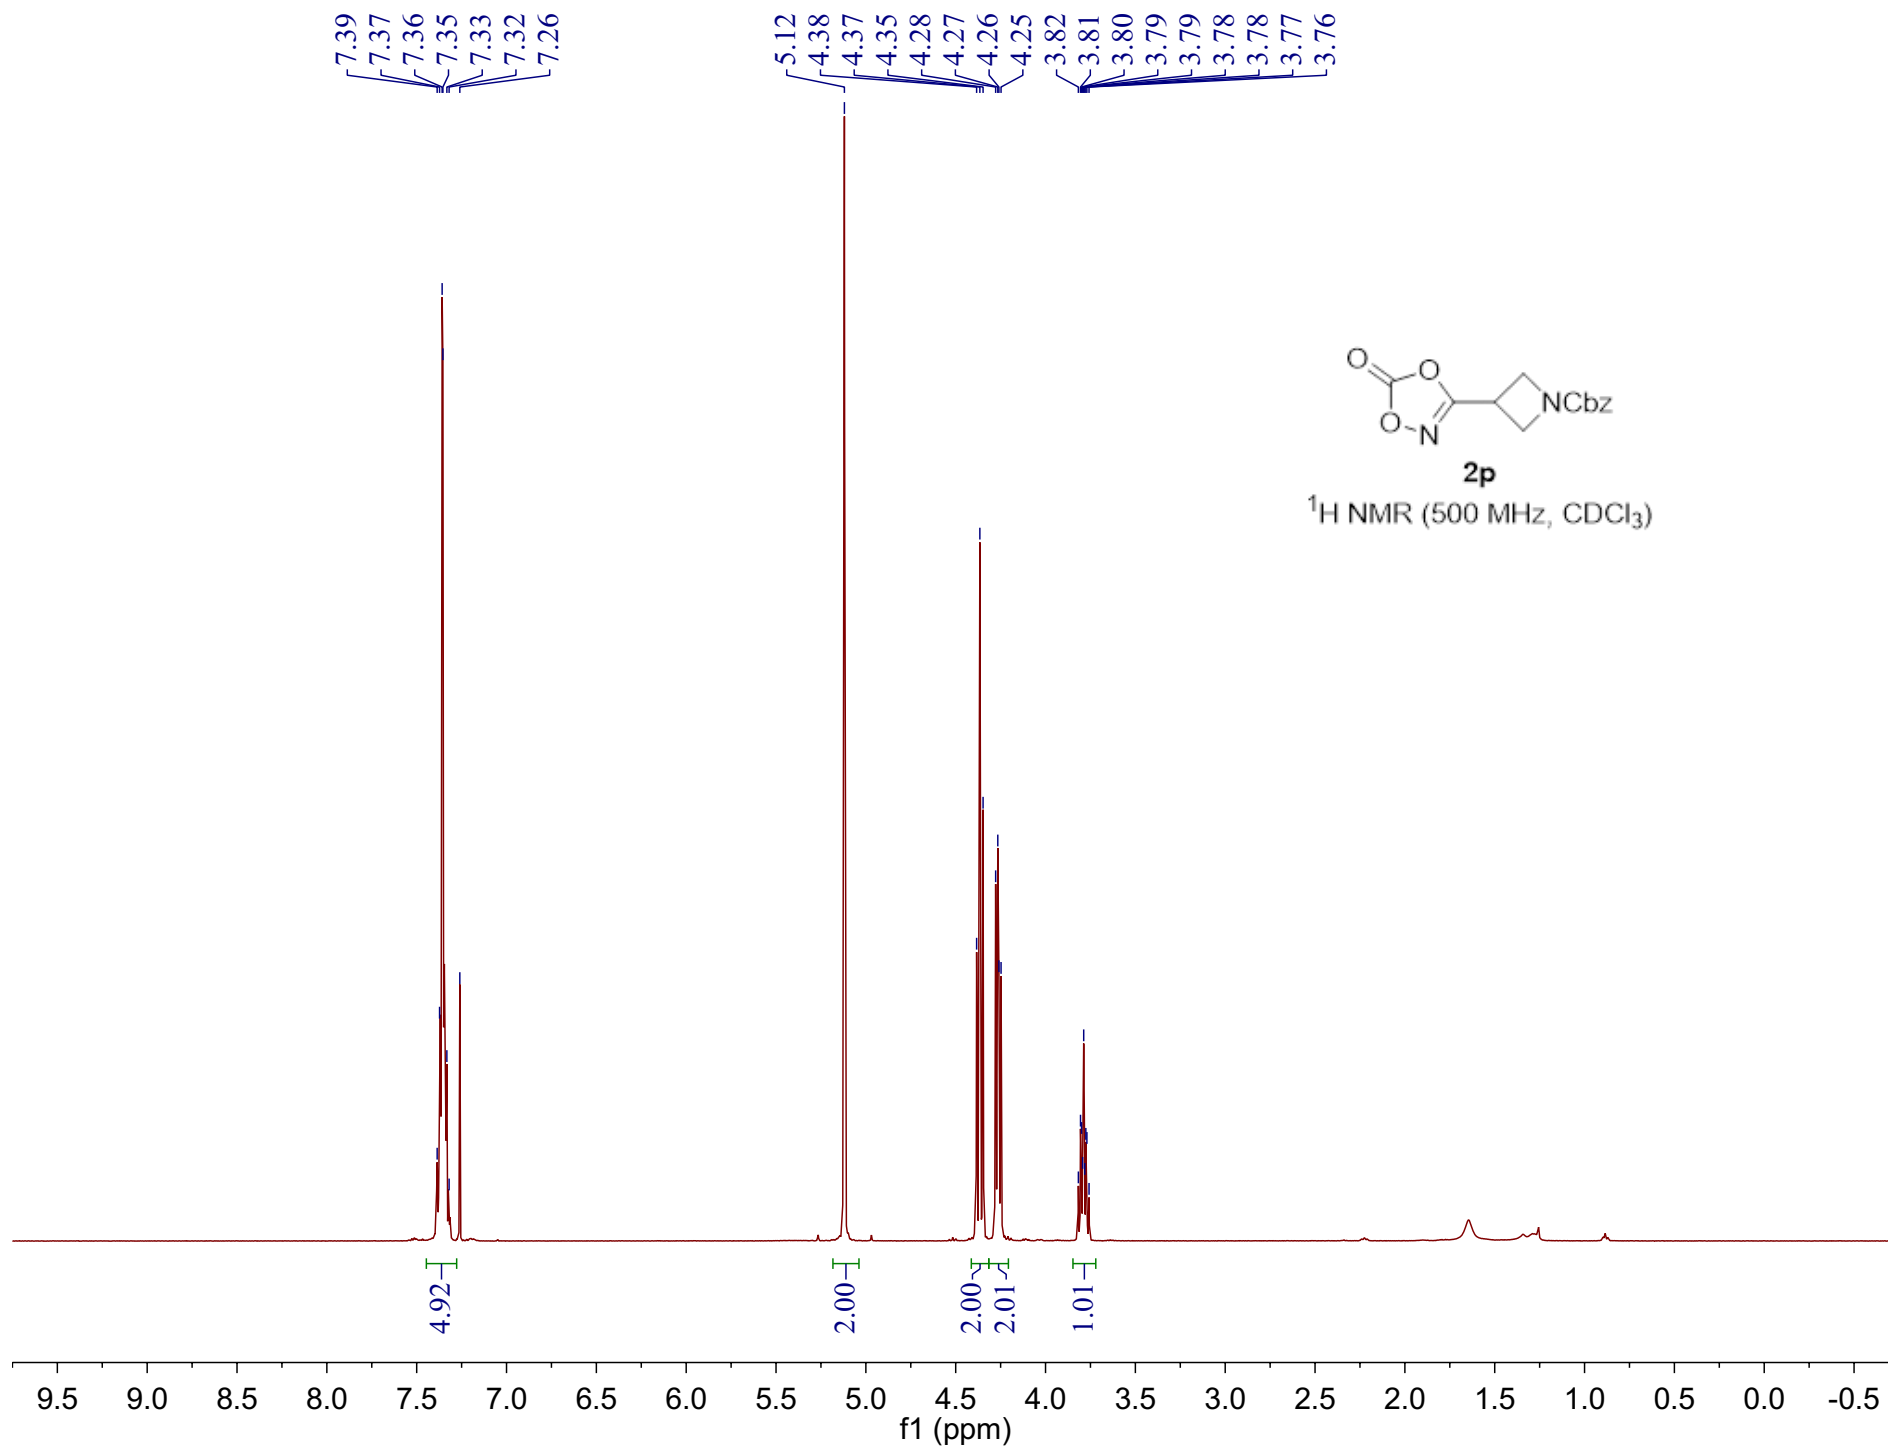

Supplementary Figure 179:  $^1\text{H}$  NMR (500 MHz,  $\text{CDCl}_3$ ) spectrum of **2p**.

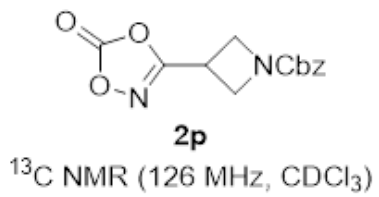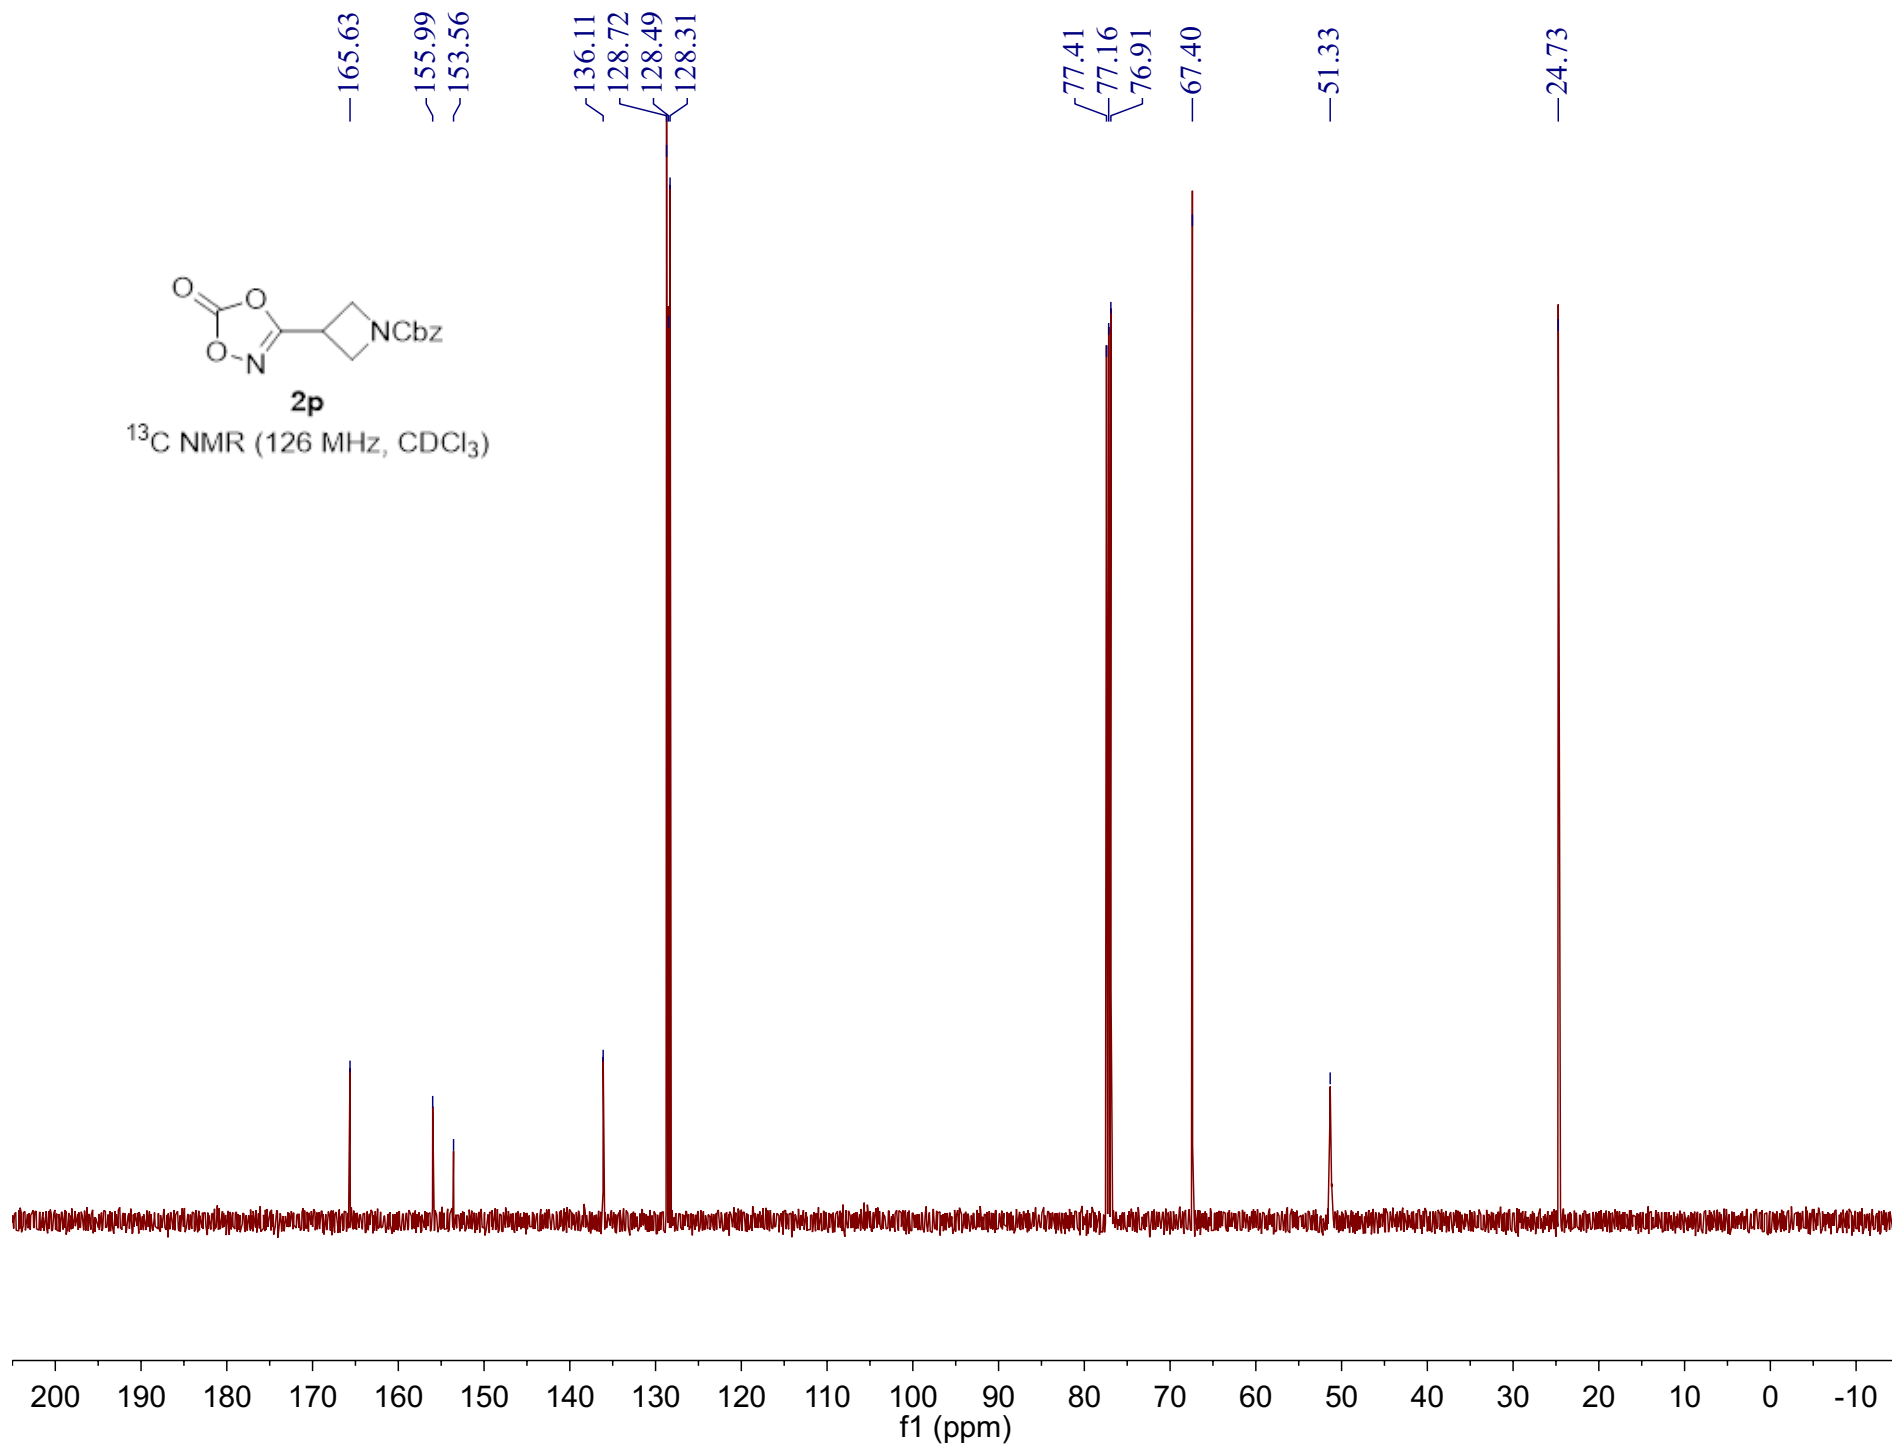

Supplementary Figure 180: <sup>13</sup>C NMR (126 MHz, CDCl<sub>3</sub>) spectrum of **2p**.

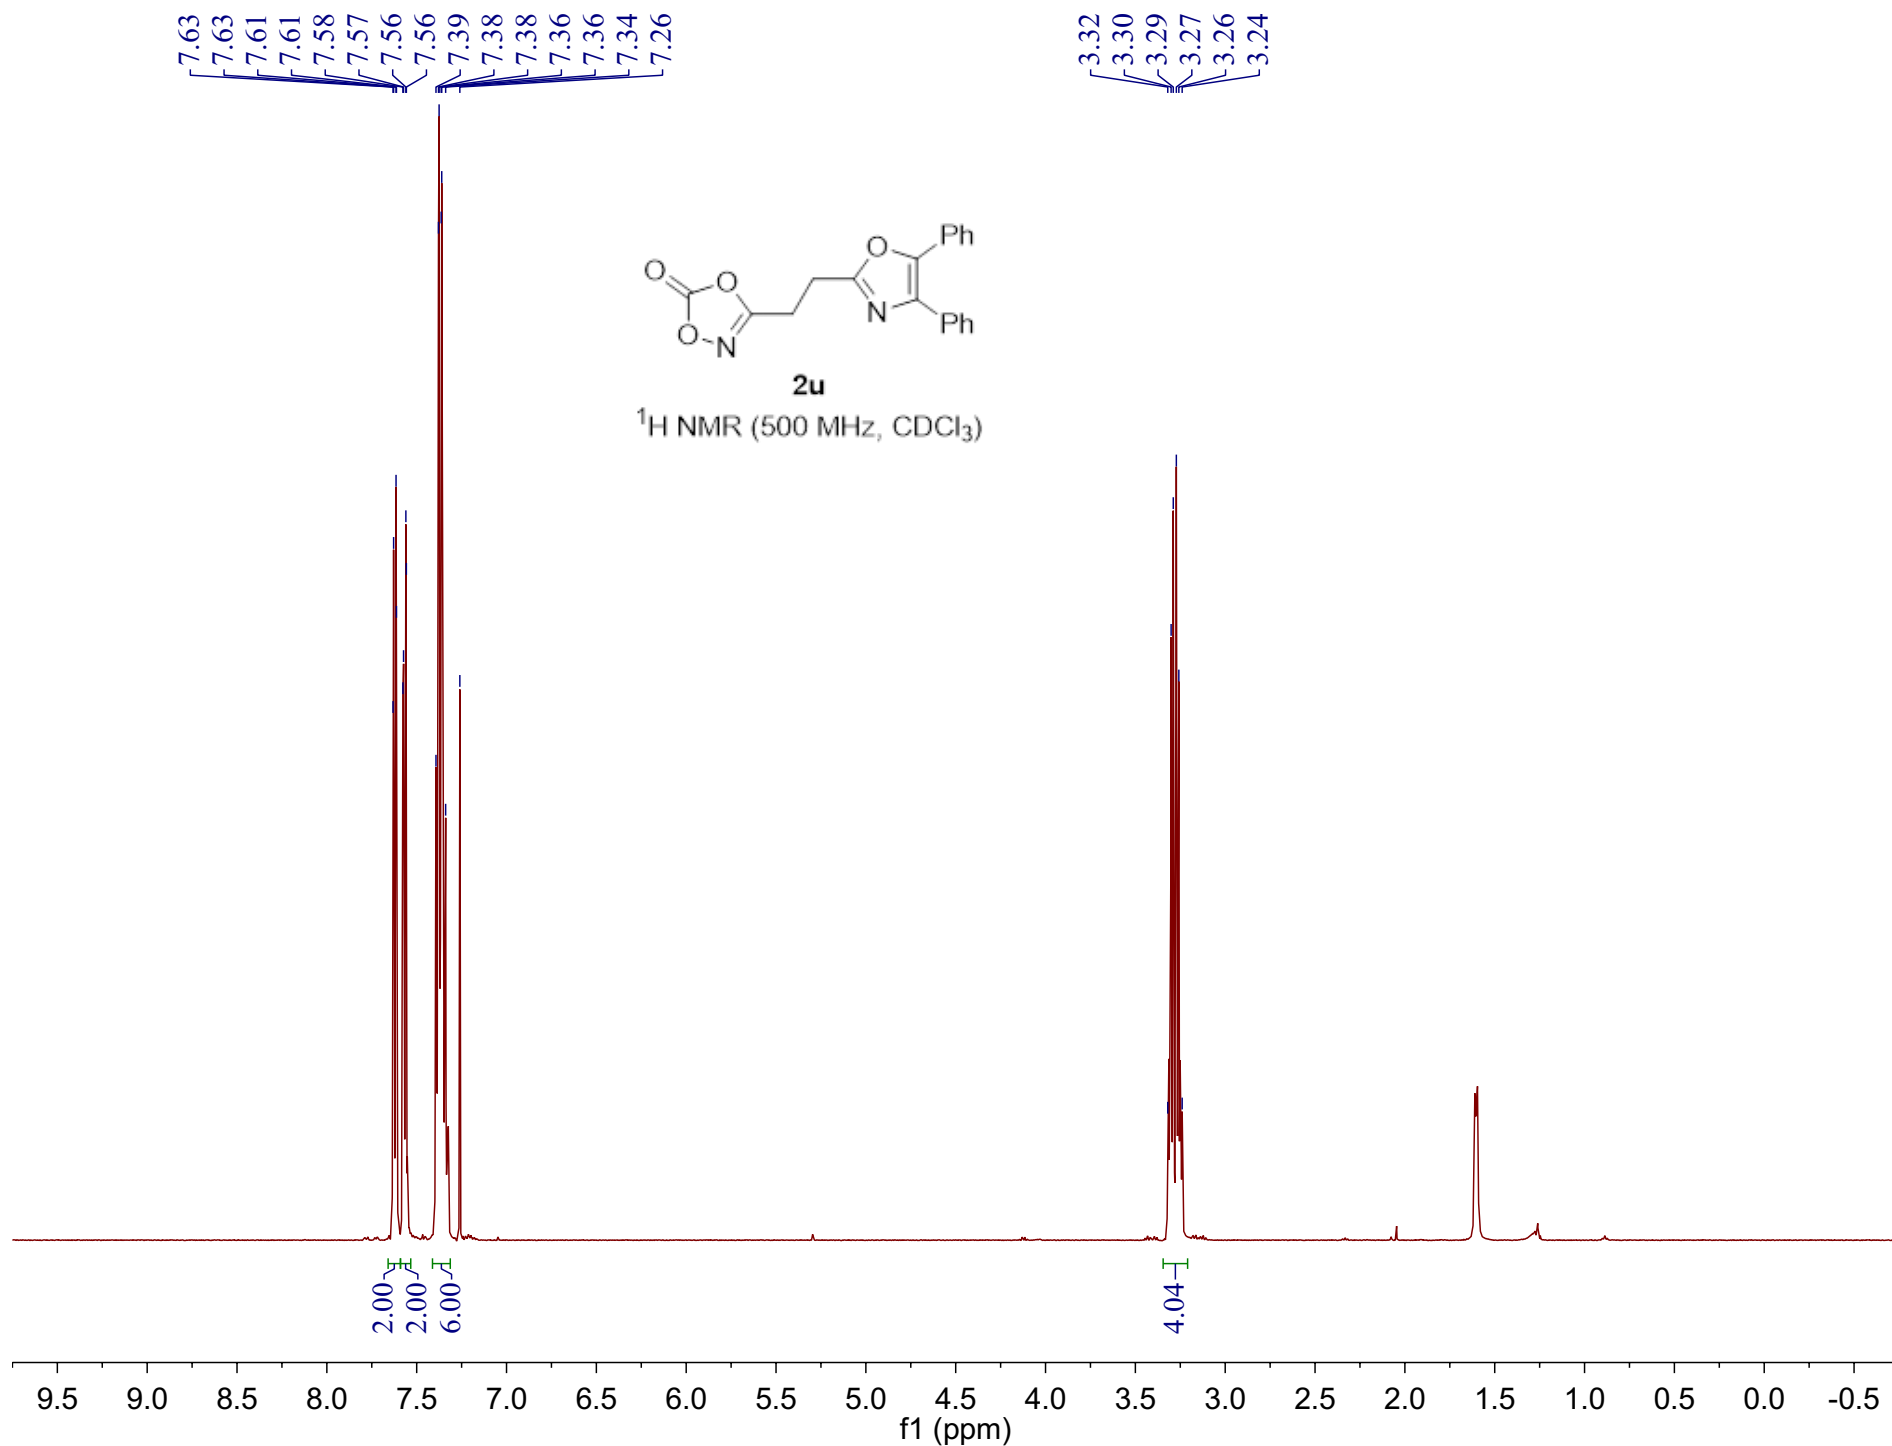

Supplementary Figure 181: <sup>1</sup>H NMR (500 MHz, CDCl<sub>3</sub>) spectrum of **2u**.

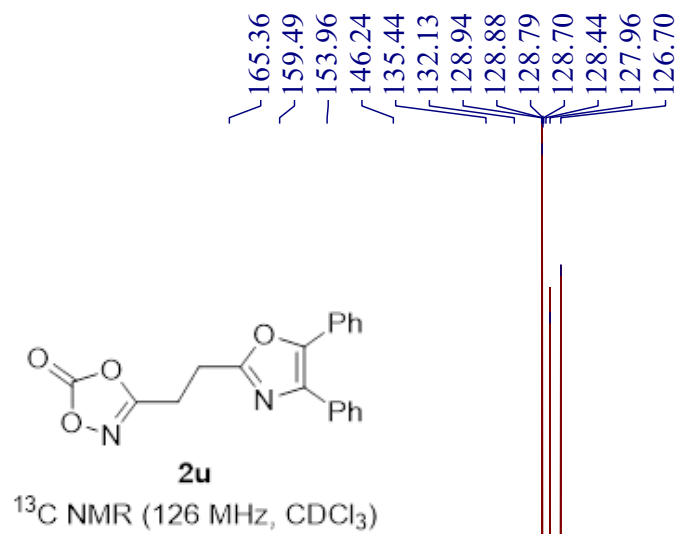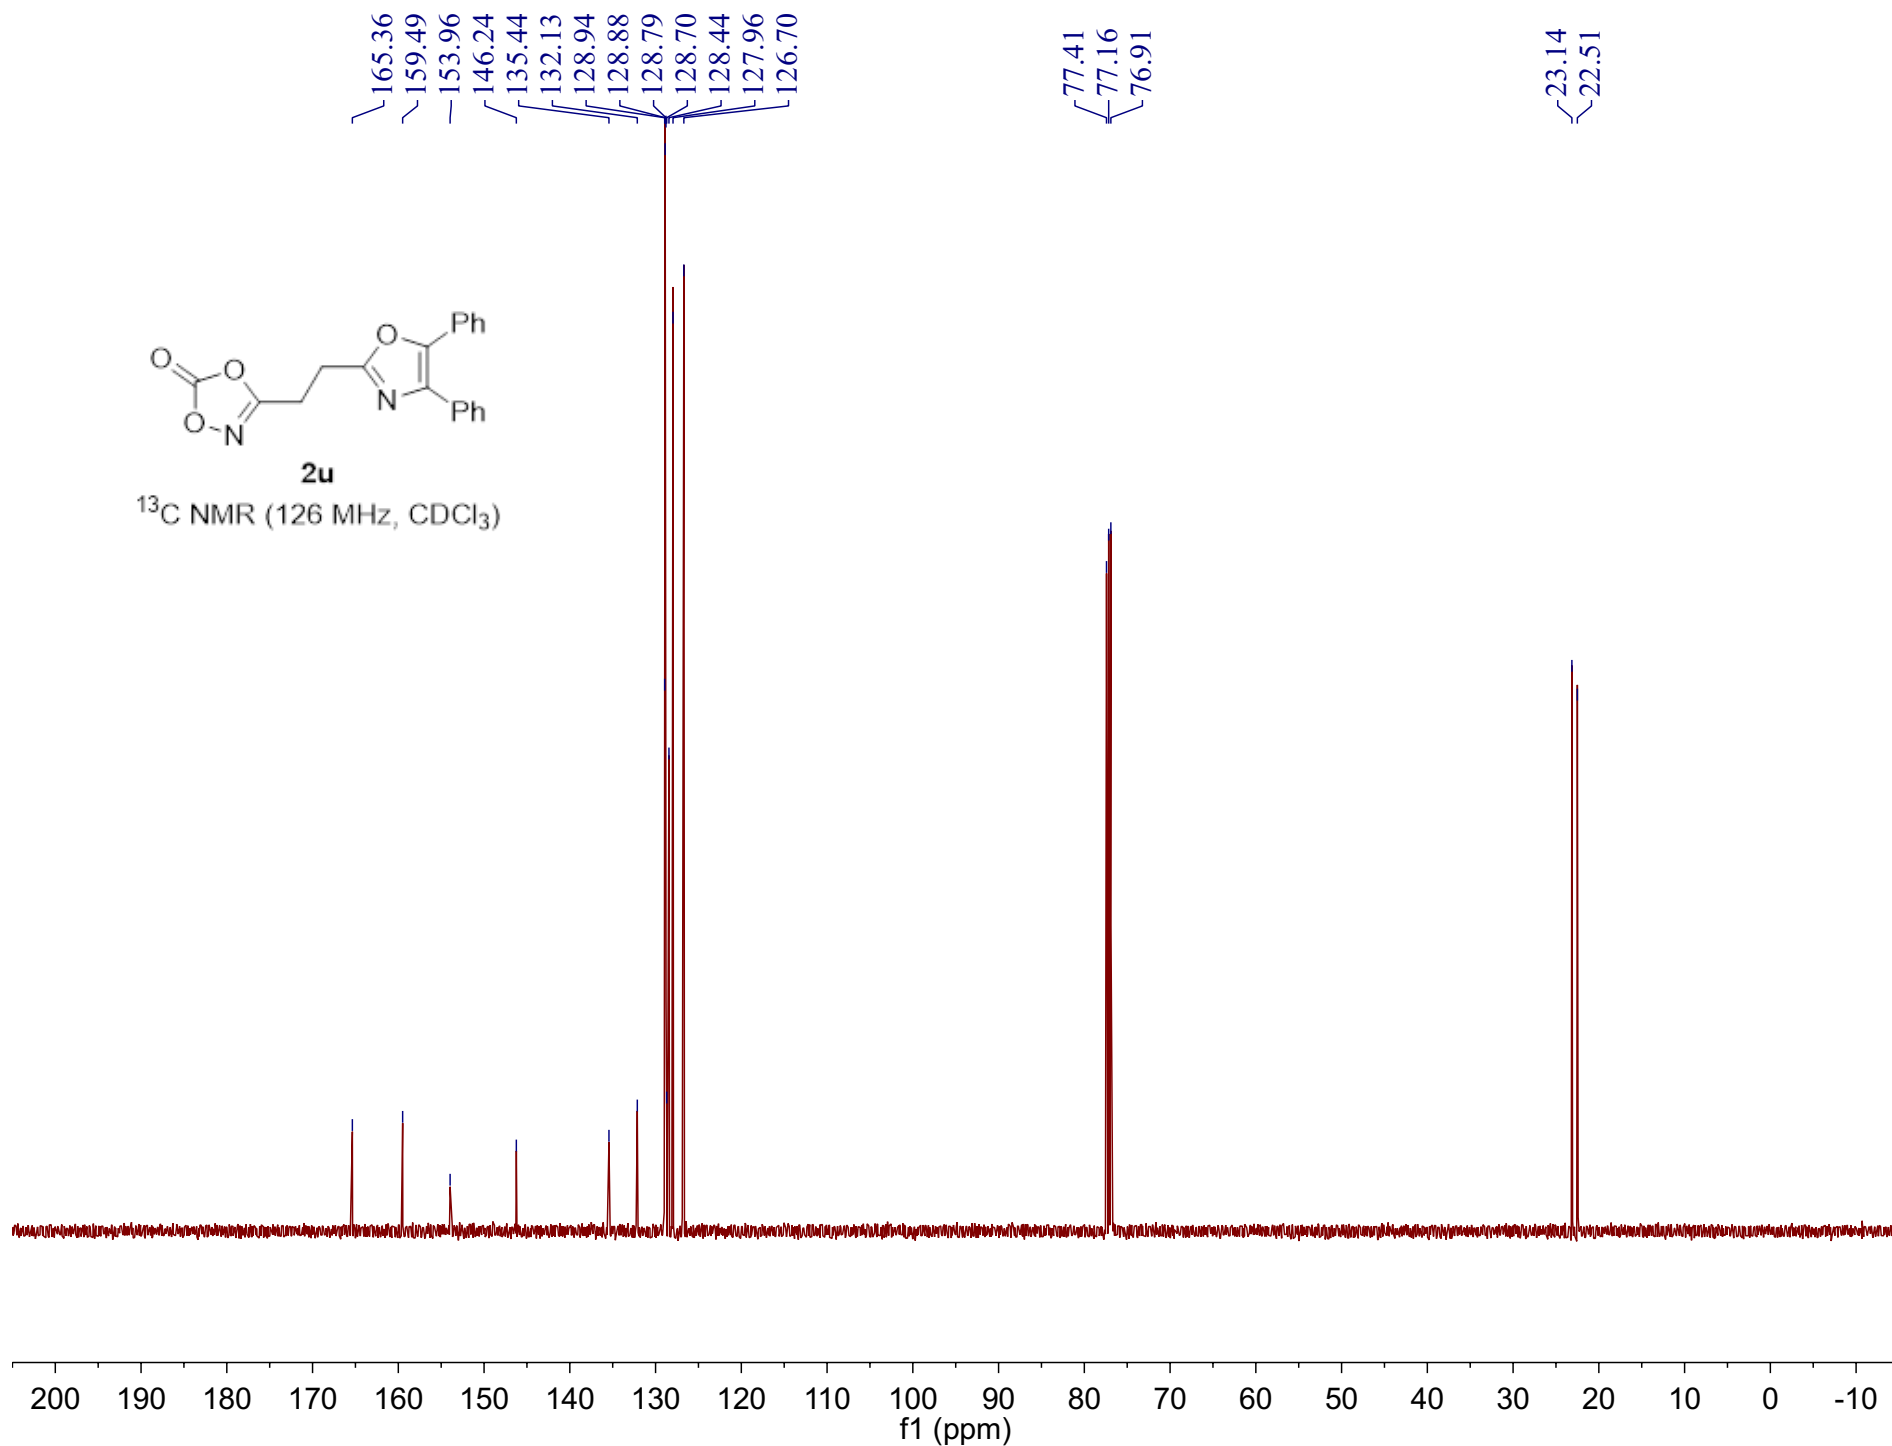

Supplementary Figure 182: <sup>13</sup>C NMR (126 MHz, CDCl<sub>3</sub>) spectrum of **2u**.

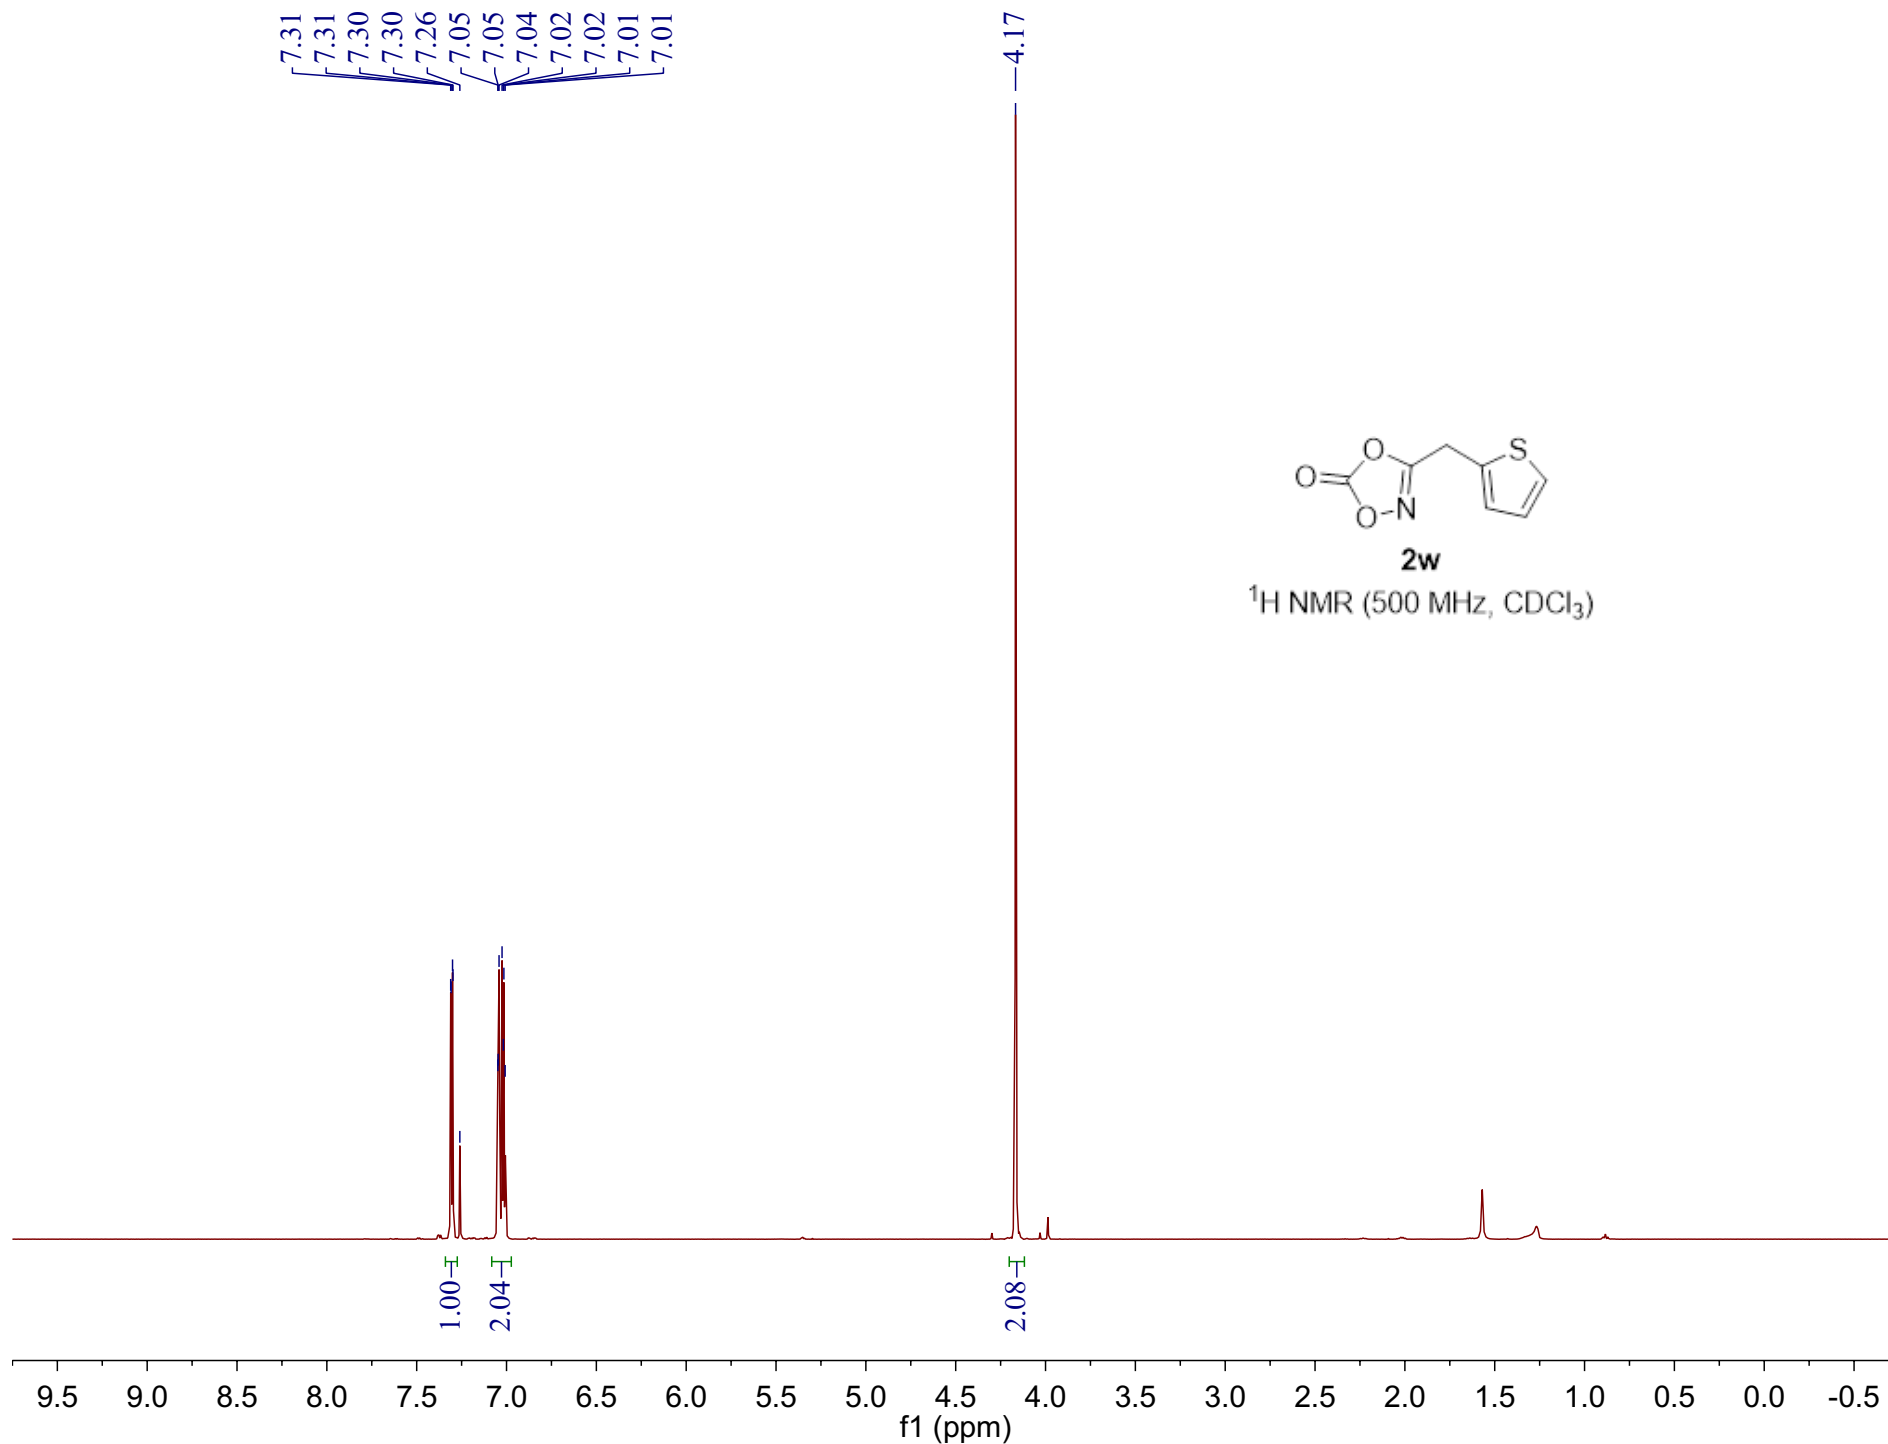

Supplementary Figure 183: <sup>1</sup>H NMR (500 MHz, CDCl<sub>3</sub>) spectrum of **2w**.

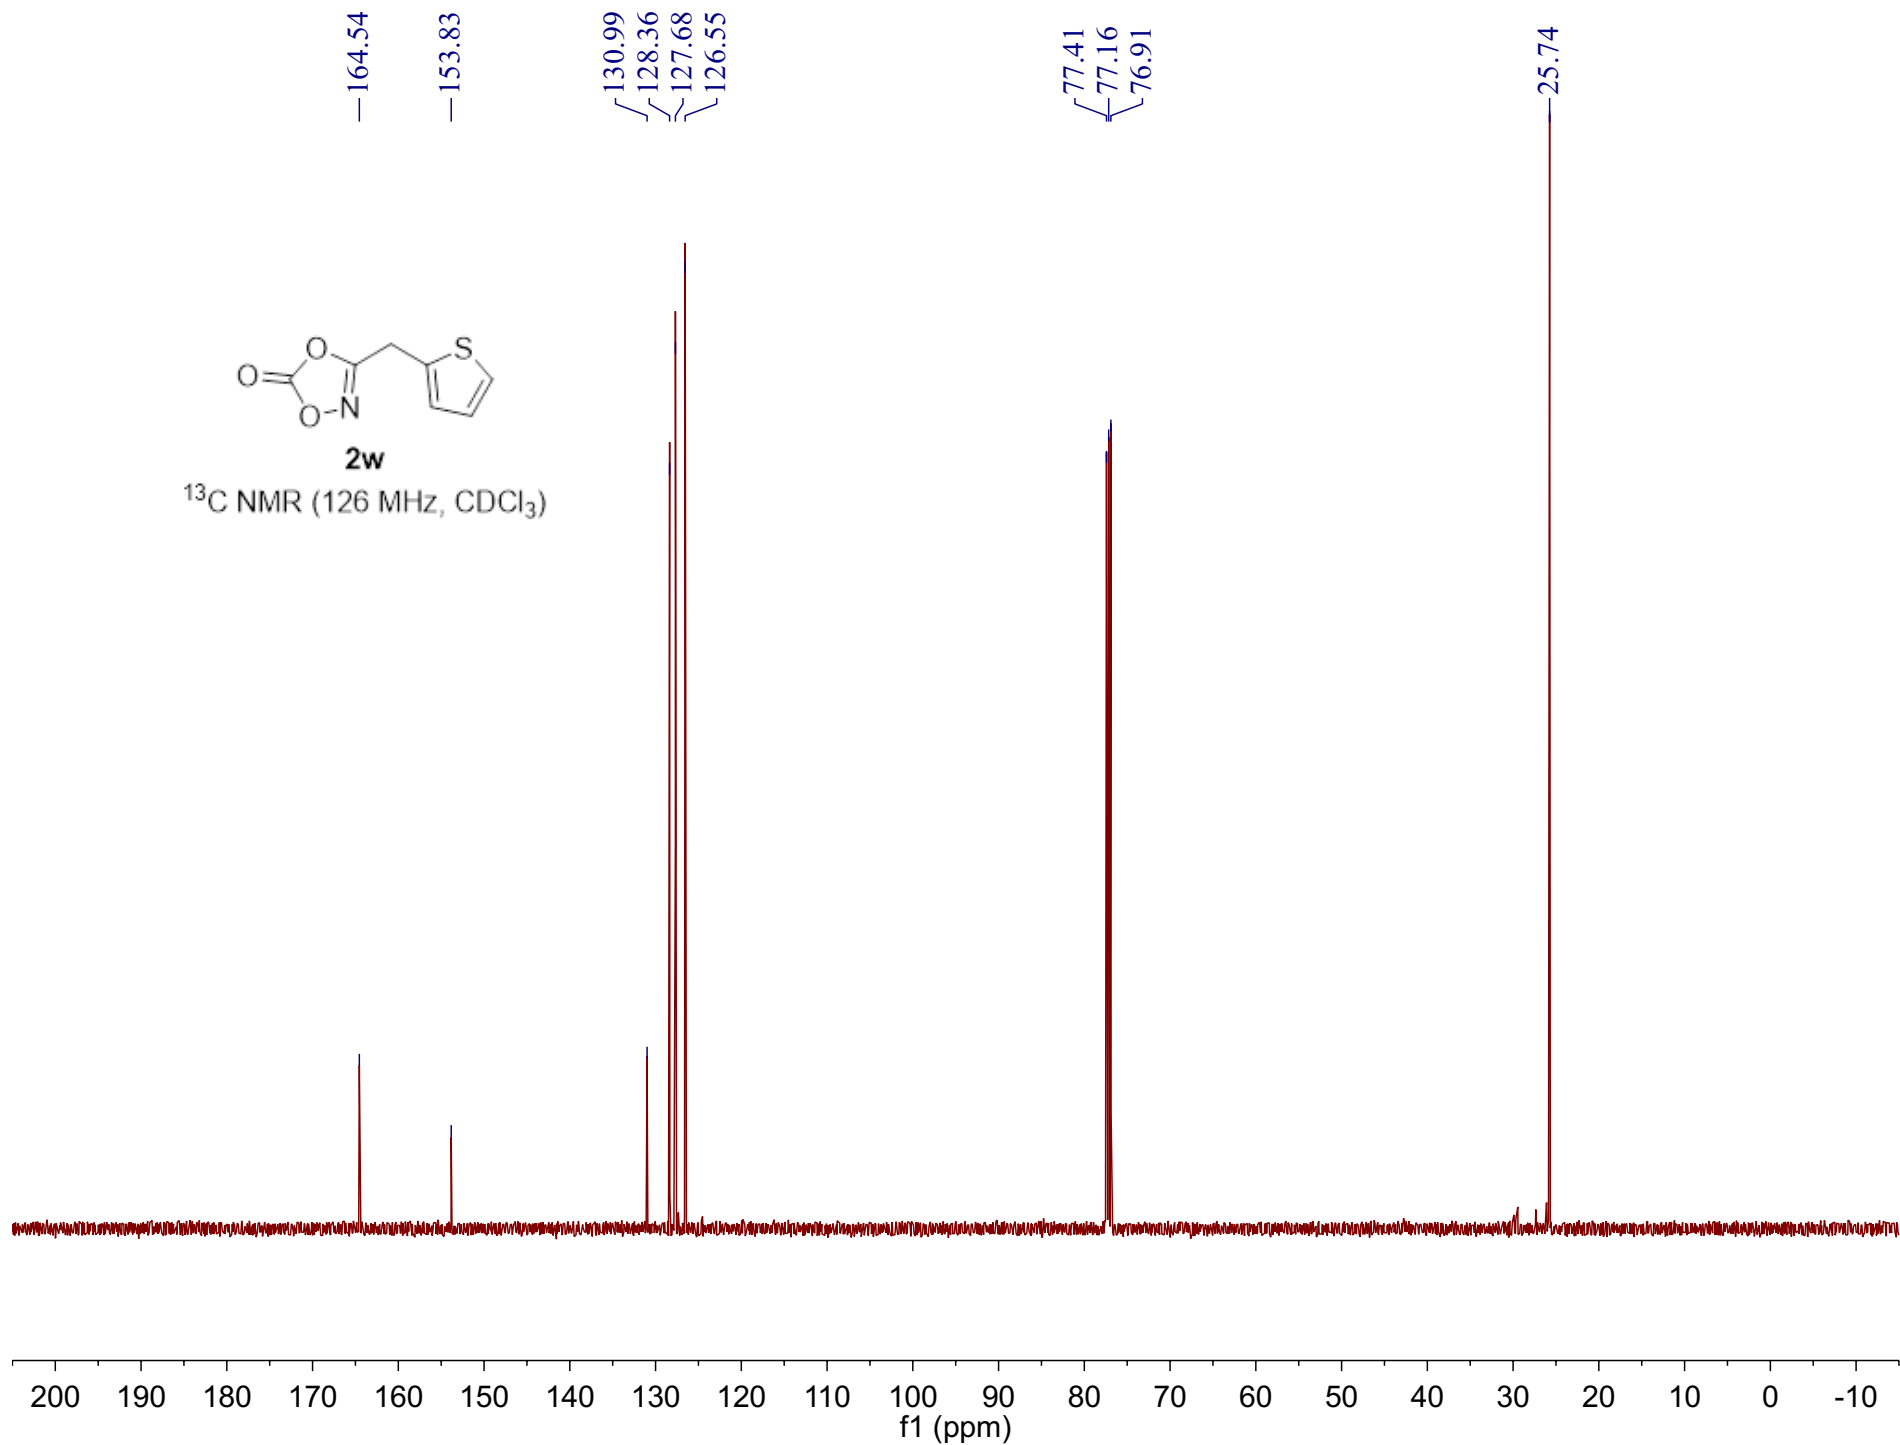

Supplementary Figure 184: <sup>13</sup>C NMR (126 MHz, CDCl<sub>3</sub>) spectrum of **2w**.



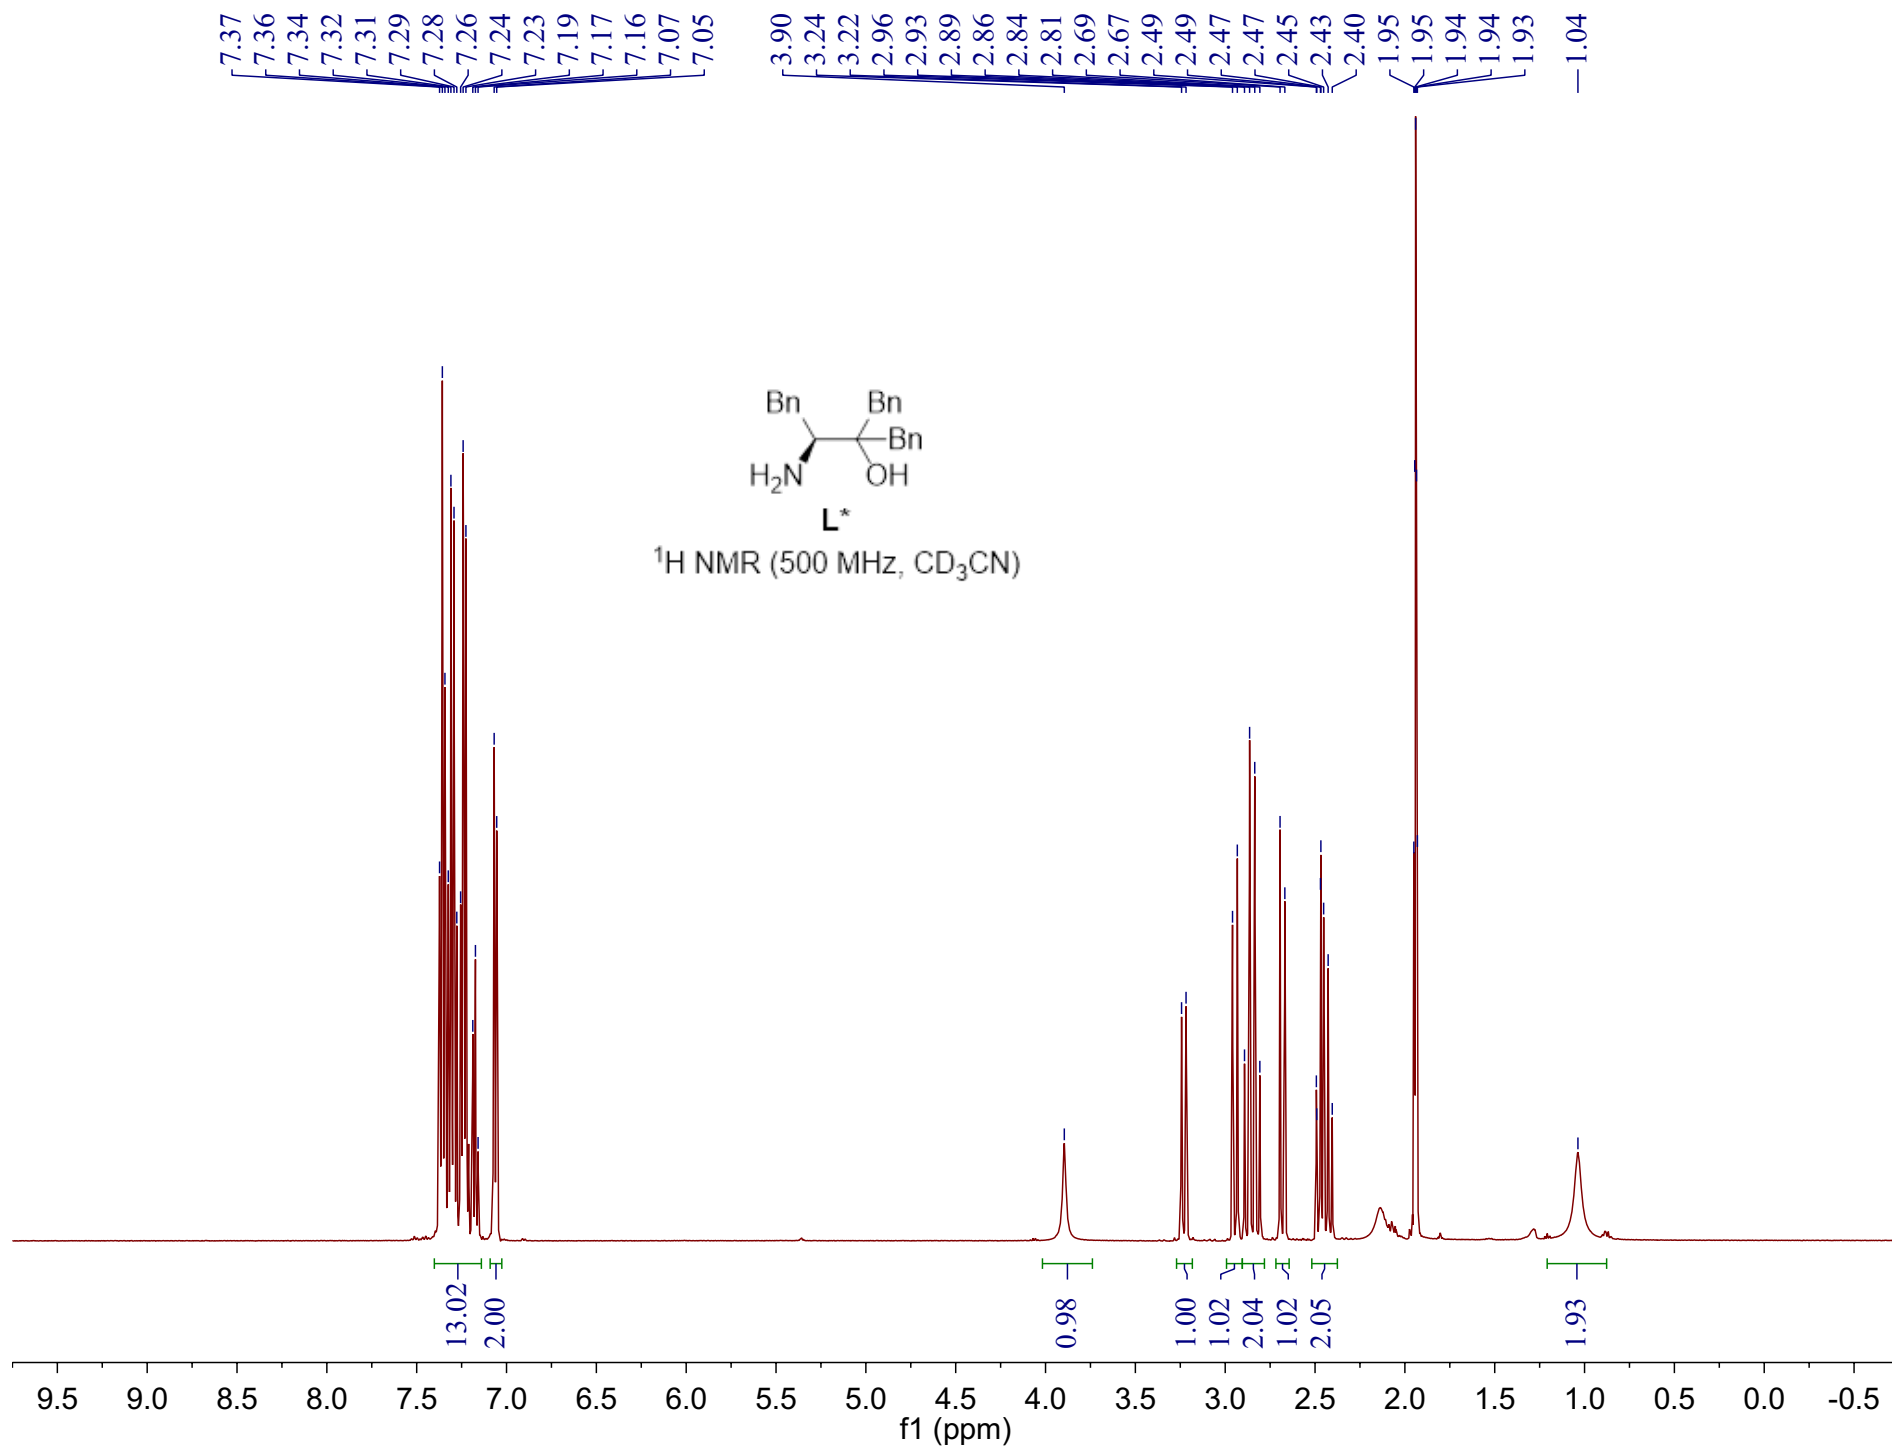

Supplementary Figure 185: <sup>1</sup>H NMR (500 MHz, CD<sub>3</sub>CN) spectrum of L\*.

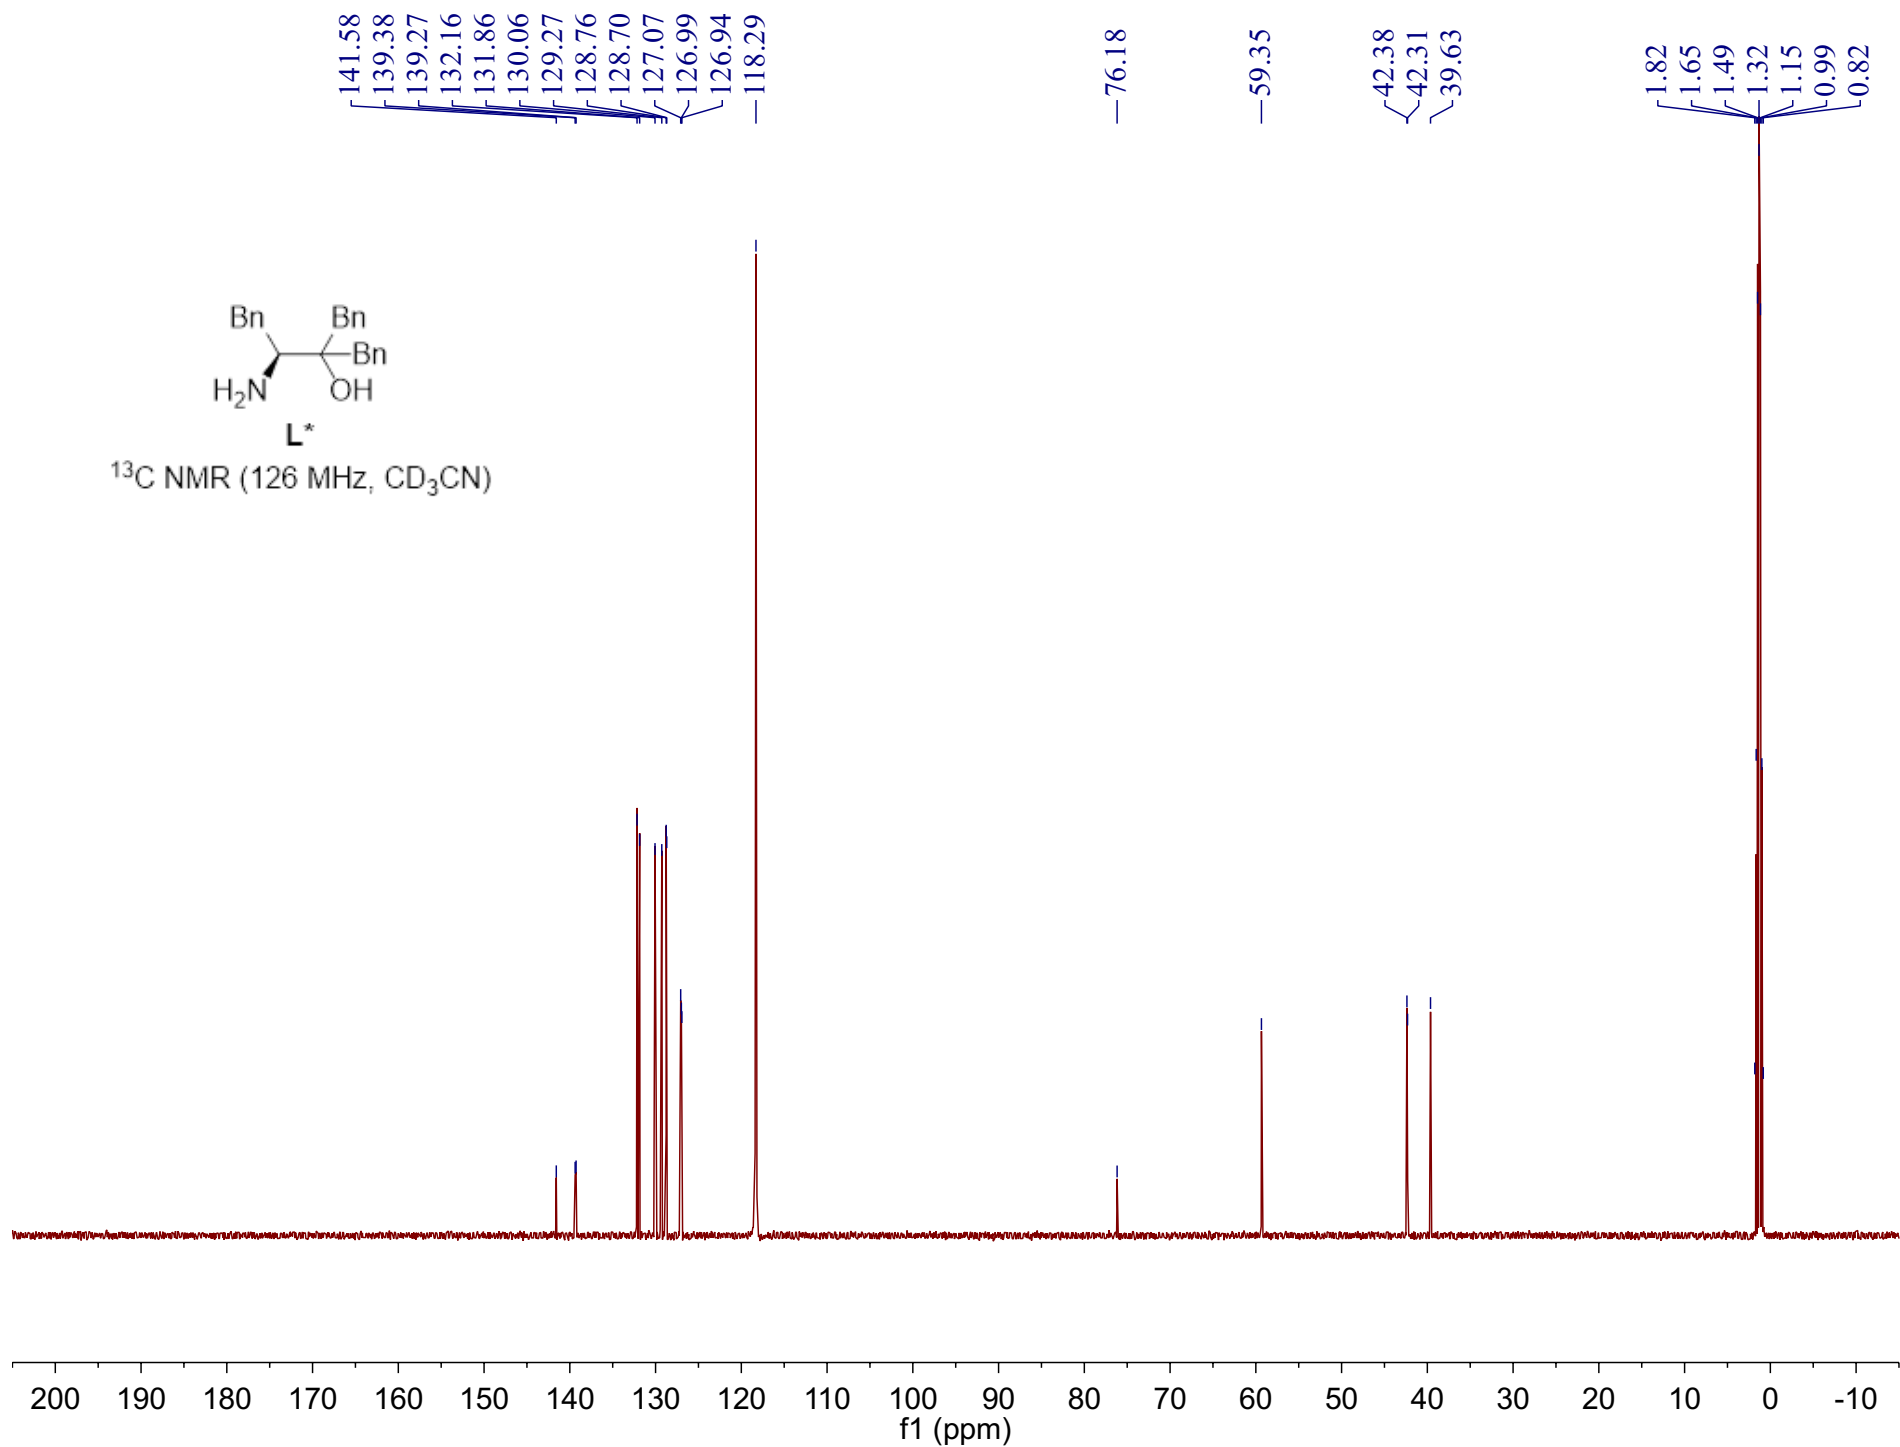

Supplementary Figure 186:  $^{13}\text{C}$  NMR (126 MHz,  $\text{CD}_3\text{CN}$ ) spectrum of **L\***.

## 2. HPLC Trace

Data File H:\ORIGINAL DATA\ZY-09-146-10-RAC.D

Sample Name: ZY-09-146-10-IE

```
=====
Acq. Operator   : 系统                      Seq. Line :    3
Acq. Instrument : HPLC-1260                 Location  :   61
Injection Date  : 1/29/2022 5:06:07 PM      Inj       :    1
                                           Inj Volume: 3.000 µl
Different Inj Volume from Sample Entry! Actual Inj Volume : 0.500 µl
Acq. Method    : D:\zy\20220124\YH 2022-01-29 16-32-07\5EtOH10_10-1-6-240.M
Last changed   : 1/29/2022 4:32:31 PM by 系统
Analysis Method : E:\DATA\20220317\LC 2022-03-28 16-47-04\3IPA_30_8_2. -SFT.M (Sequence Method)
                                           )
Last changed   : 3/28/2022 10:48:30 PM by SYSTEM
                                           (modified after loading)
=====
```

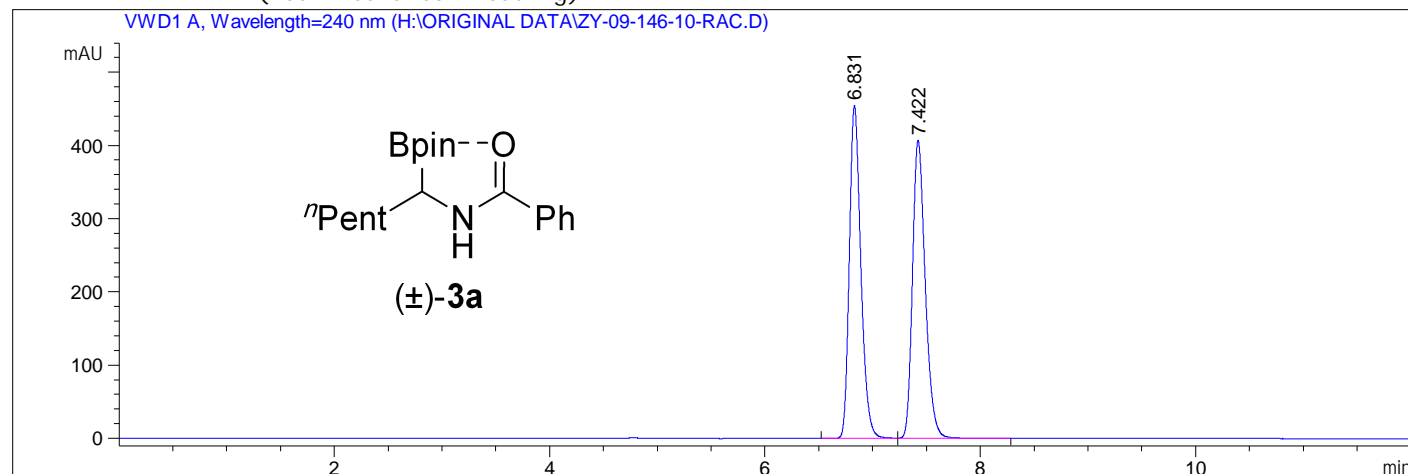

### Area Percent Report

```
Sorted By      :      Signal
Multiplier     :      1.0000
Dilution       :      1.0000
Do not use Multiplier & Dilution Factor with ISTDs
```

Signal 1: VWD1 A, Wavelength=240 nm

| Peak # | RetTime [min] | Type | Width [min] | Area [mAU*s] | Height [mAU] | Area %  |
|--------|---------------|------|-------------|--------------|--------------|---------|
| 1      | 6.831         | VB R | 0.1130      | 3366.24365   | 454.14883    | 50.1751 |
| 2      | 7.422         | BB   | 0.1259      | 3342.75000   | 406.73416    | 49.8249 |

Totals :                                    6708.99365   860.88300

\*\*\* End of Report \*\*\*

## Supplementary Figure 187: HPLC spectrum of (±)-3a.

Sample Name: ZY-09-146-10-EE

```

=====
Acq. Operator   : 系统                      Seq. Line :    2
Acq. Instrument : HPLC-1260                 Location  :   63
Injection Date  : 1/29/2022 9:49:47 PM      Inj       :    1
                                           Inj Volume: 3.000 µl
Different Inj Volume from Sample Entry! Actual Inj Volume : 0.300 µl
Acq. Method    : D:\zy\20220124\YH 2022-01-29 21-31-36\5EtOH10_10-1-6-240.M
Last changed   : 1/29/2022 9:31:43 PM by 系统
Analysis Method : E:\DATA\20220317\LC 2022-03-28 16-47-04\3IPA_30_8_2. -SFT.M (Sequence Method)
                                           )
Last changed   : 3/28/2022 10:47:29 PM by SYSTEM
                                           (modified after loading)
=====

```

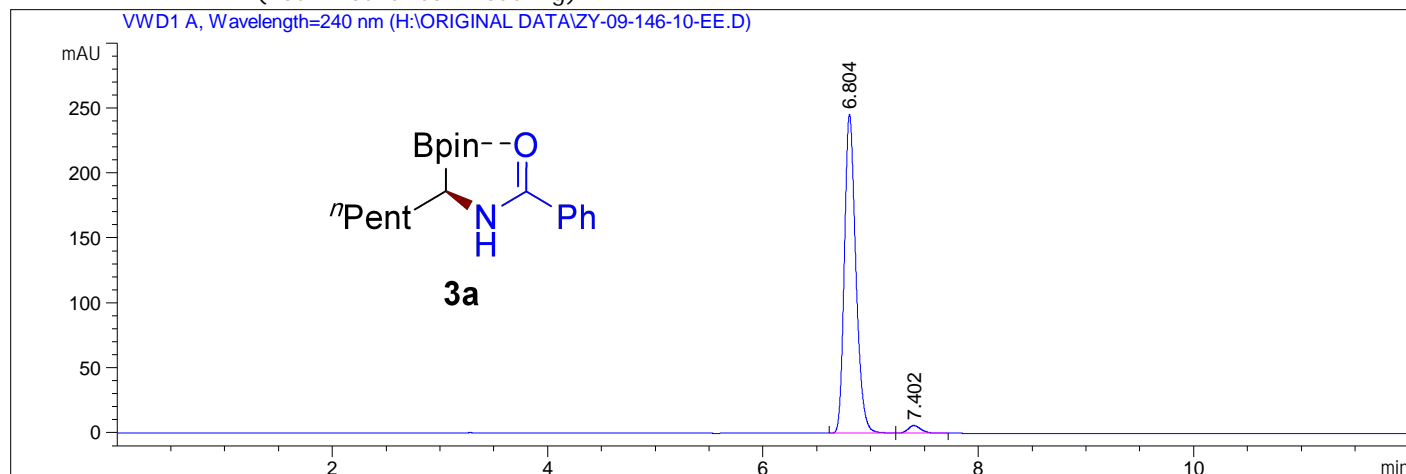

```

=====
Area Percent Report
=====

```

```

Sorted By      :      Signal
Multiplier     :      1.0000
Dilution       :      1.0000
Do not use Multiplier & Dilution Factor with ISTDs

```

Signal 1: VWD1 A, Wavelength=240 nm

| Peak # | RetTime [min] | Type | Width [min] | Area [mAU*s] | Height [mAU] | Area %  |
|--------|---------------|------|-------------|--------------|--------------|---------|
| 1      | 6.804         | BB   | 0.1133      | 1815.76379   | 245.36716    | 97.4591 |
| 2      | 7.402         | BB   | 0.1244      | 47.33982     | 5.81724      | 2.5409  |

```
Totals :                      1863.10361  251.18439
```

```

=====
*** End of Report ***
=====

```

**Supplementary Figure 188: HPLC spectrum of 3a.**

Sample Name: ZY-09-195-2-EE

```

=====
Acq. Operator   : 系统                      Seq. Line :    7
Acq. Instrument : HPLC-1260                 Location  :   84
Injection Date  : 2/15/2022 10:02:32 AM     Inj       :    1
                                           Inj Volume: 3.000 µl
Different Inj Volume from Sample Entry! Actual Inj Volume : 0.500 µl
Acq. Method    : D:\zy\20220201\YH 2022-02-15 08-43-37\5EtOH15_10-1-2-240.M
Last changed   : 2/15/2022 9:33:50 AM by 系统
Analysis Method : E:\DATA\20220316\LC 2022-03-16 22-19-08\10IPA-10-1.0-1.MZJ.M (Sequence
Method)
Last changed   : 3/29/2022 9:51:28 AM by SYSTEM
(modified after loading)
Additional Info : Peak(s) manually integrated

```

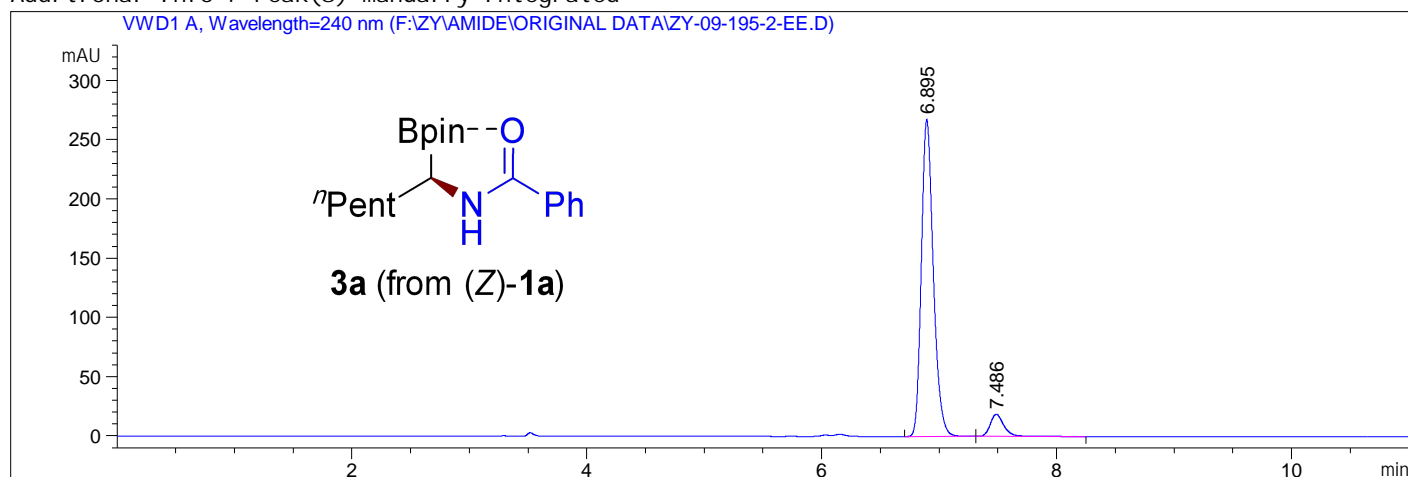

```

=====
Area Percent Report
=====

```

```

Sorted By      :      Signal
Multiplier     :      1.0000
Dilution       :      1.0000
Do not use Multiplier & Dilution Factor with ISTDs

```

Signal 1: VWD1 A, Wavelength=240 nm

| Peak # | RetTime [min] | Type | Width [min] | Area [mAU*s] | Height [mAU] | Area %  |
|--------|---------------|------|-------------|--------------|--------------|---------|
| 1      | 6.895         | BB   | 0.1081      | 1892.65186   | 267.47192    | 92.4615 |
| 2      | 7.486         | BB   | 0.1246      | 154.30952    | 18.72402     | 7.5385  |

```
Totals :                2046.96138  286.19595
```

```

=====
*** End of Report ***
=====

```

**Supplementary Figure 189: HPLC spectrum of 3a (from (Z)-1a).**

Sample Name: ZY-10-57-1-RAC

```

=====
Acq. Operator   : SYSTEM                      Seq. Line :    6
Acq. Instrument : HPLC1260                   Location  : P1-F2
Injection Date  : 3/21/2022 10:24:39 AM      Inj       :    1
                                           Inj Volume: 3.000 µl
Different Inj Volume from Sample Entry! Actual Inj Volume : 0.300 µl
Acq. Method     : E:\DATA\20220317\LC 2022-03-21 09-08-37\8I PA_15_0.5_1-254.M
Last changed    : 3/21/2022 9:08:37 AM by SYSTEM
Analysis Method : E:\DATA\20220317\LC 2022-03-21 09-08-37\8I PA_15_0.5_1-254.M (Sequence
                  Method)
Last changed    : 3/21/2022 12:17:47 PM by SYSTEM
                  (modified after loading)
Additional Info : Peak(s) manually integrated
  
```

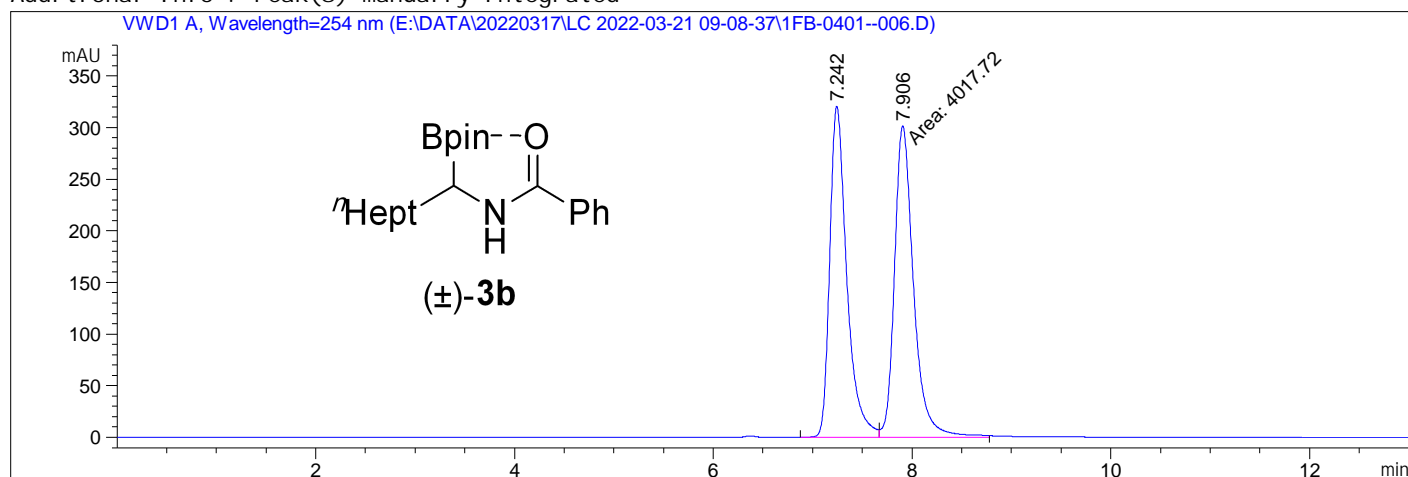

```

=====
                          Area Percent Report
=====
  
```

```

Sorted By      :      Signal
Multiplier     :      1.0000
Dilution       :      1.0000
Do not use Multiplier & Dilution Factor with ISTDs
  
```

Signal 1: VWD1 A, Wavelength=254 nm

| Peak # | RetTime [min] | Type | Width [min] | Area [mAU*s] | Height [mAU] | Area %  |
|--------|---------------|------|-------------|--------------|--------------|---------|
| 1      | 7.242         | BV   | 0.1790      | 3818.48267   | 320.39621    | 48.7287 |
| 2      | 7.906         | MF   | 0.2222      | 4017.72388   | 301.33694    | 51.2713 |

```
Totals :                      7836.20654  621.73315
```

```

=====
*** End of Report ***
  
```

**Supplementary Figure 190: HPLC spectrum of (±)-3b.**

Sample Name: ZY-09-168-1-EE

```

=====
Acq. Operator   : SYSTEM                      Seq. Line   :    3
Acq. Instrument : HPLC1260                   Location    : P1-F3
Injection Date  : 3/21/2022 9:37:16 AM      Inj         :    1
                                           Inj Volume  : 3.000 µl
Different Inj Volume from Sample Entry! Actual Inj Volume : 0.500 µl
Acq. Method     : E:\DATA\20220317\LC 2022-03-21 09-08-37\8I PA_15_0.5_1-254.M
Last changed    : 3/21/2022 9:08:37 AM by SYSTEM
Analysis Method : E:\DATA\20220317\LC 2022-03-21 09-08-37\8I PA_15_0.5_1-254.M (Sequence
Method)
Last changed    : 3/21/2022 12:17:47 PM by SYSTEM
                 (modified after loading)
Additional Info : Peak(s) manually integrated
    
```

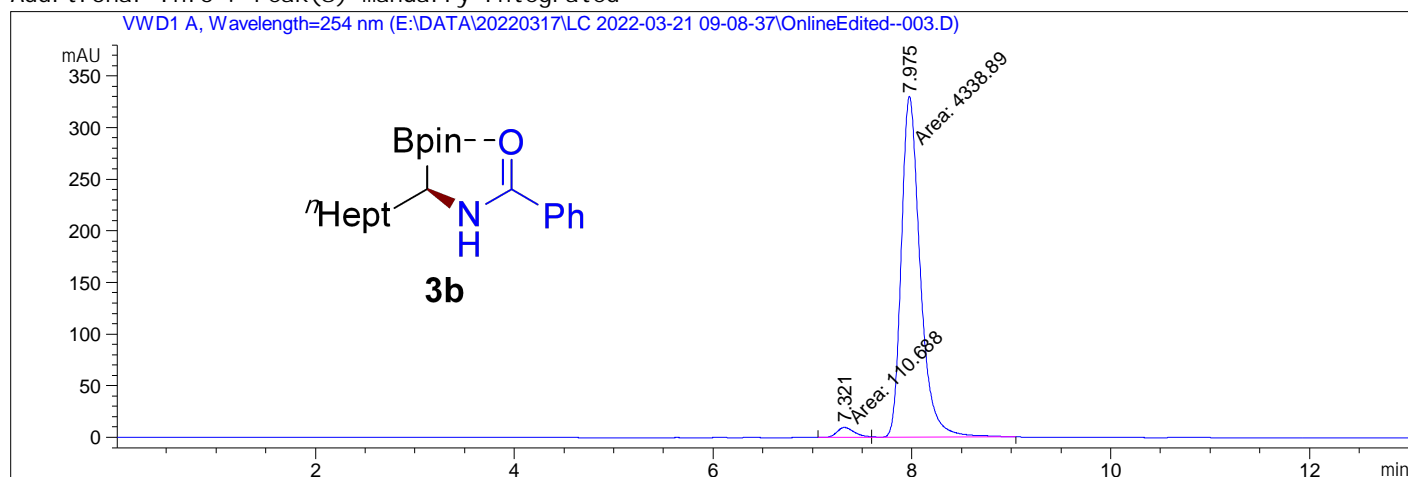

Area Percent Report

```

Sorted By      : Signal
Multiplier     : 1.0000
Dilution       : 1.0000
Do not use Multiplier & Dilution Factor with ISTDs
    
```

Signal 1: VWD1 A, Wavelength=254 nm

| Peak # | RetTime [min] | Type | Width [min] | Area [mAU*s] | Height [mAU] | Area %  |
|--------|---------------|------|-------------|--------------|--------------|---------|
| 1      | 7.321         | MF   | 0.1973      | 110.68835    | 9.35163      | 2.4876  |
| 2      | 7.975         | FM   | 0.2193      | 4338.88623   | 329.76462    | 97.5124 |

Totals : 4449.57458 339.11625

\*\*\* End of Report \*\*\*

Supplementary Figure 191: HPLC spectrum of 3b.

Sample Name: ZY-10-57-1-EE

```

=====
Acq. Operator   : SYSTEM                      Seq. Line :    4
Acq. Instrument : HPLC1260                   Location  : P1-F1
Injection Date  : 3/21/2022 9:53:03 AM       Inj       :    1
                                                Inj Volume: 3.000 µl
Different Inj Volume from Sample Entry! Actual Inj Volume : 2.000 µl
Acq. Method    : E:\DATA\20220317\LC 2022-03-21 09-08-37\8I PA_15_0.5_1-254.M
Last changed   : 3/21/2022 9:08:37 AM by SYSTEM
Analysis Method : E:\DATA\20220317\LC 2022-03-21 09-08-37\8I PA_15_0.5_1-254.M (Sequence
                Method)
Last changed   : 3/21/2022 12:17:47 PM by SYSTEM
                (modified after loading)
=====

```

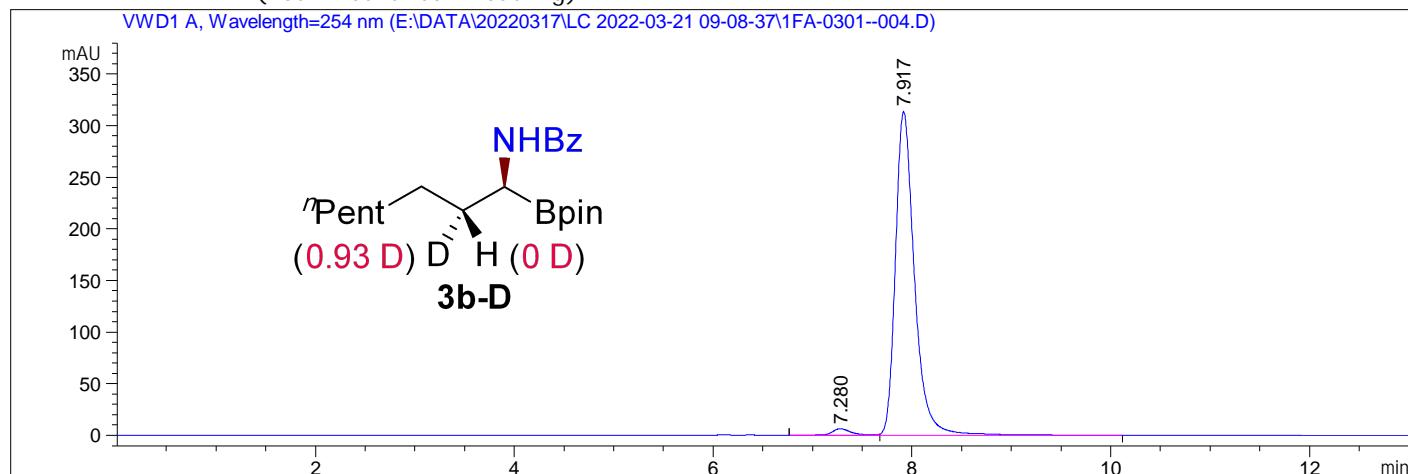

```

=====
Area Percent Report
=====

```

```

Sorted By      :      Signal
Multiplier     :      1.0000
Dilution       :      1.0000
Do not use Multiplier & Dilution Factor with ISTDs

```

Signal 1: VWD1 A, Wavelength=254 nm

| Peak # | RetTime [min] | Type | Width [min] | Area [mAU*s] | Height [mAU] | Area %  |
|--------|---------------|------|-------------|--------------|--------------|---------|
| 1      | 7.280         | BV E | 0.1991      | 85.09237     | 6.39980      | 1.9985  |
| 2      | 7.917         | VB R | 0.2023      | 4172.81006   | 313.51718    | 98.0015 |

```
Totals :                4257.90243  319.91699
```

```

=====
*** End of Report ***
=====

```

**Supplementary Figure 192: HPLC spectrum of 3b-D.**



Sample Name: ZY-09-187-2-RAC

```

=====
Acq. Operator   : 系统                               Seq. Line :    5
Acq. Instrument : HPLC-1260                           Location  :   44
Injection Date  : 12/23/2021 10:10:24 AM             Inj       :    1
                                                    Inj Volume: 3.000 µl
Different Inj Volume from Sample Entry! Actual Inj Volume : 0.200 µl
Acq. Method     : D:\zy\20211219\YH 2021-12-23 09-03-54\10EtOH-15-0.8-1-6-240.M
Last changed    : 12/23/2021 9:03:56 AM by 系统
Analysis Method : E:\DATA\20220316\LC 2022-03-16 22-19-08\0.6IPA-15-0.8-1-210-JXL.M (Sequence
                  Method)
Last changed    : 3/29/2022 9:27:30 AM by SYSTEM
                  (modified after loading)
Additional Info : Peak(s) manually integrated
  
```

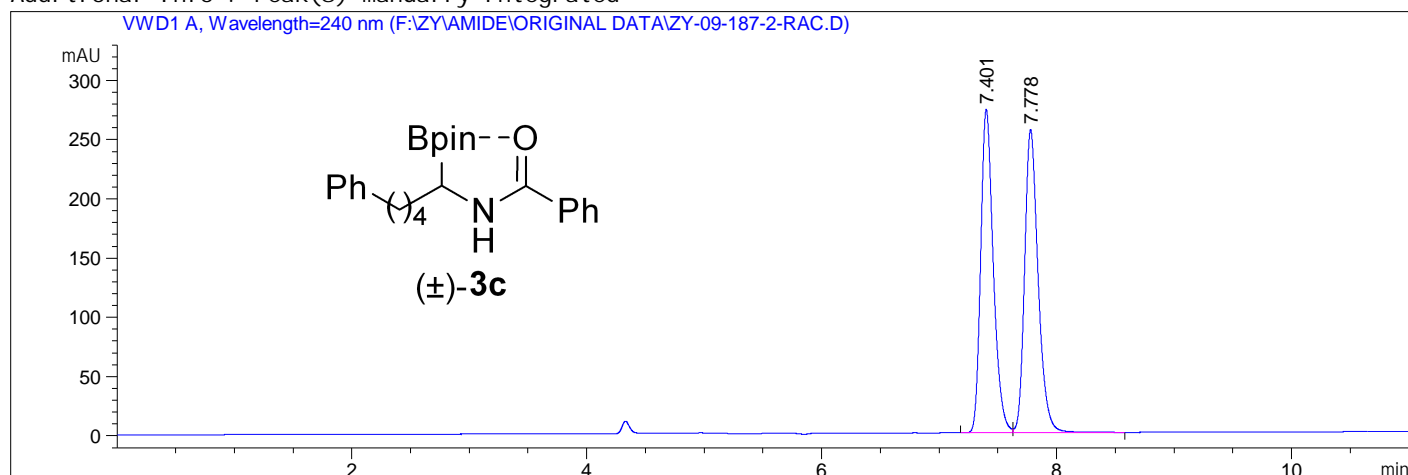

```

=====
Area Percent Report
=====
  
```

```

Sorted By      :      Signal
Multiplier     :      1.0000
Dilution       :      1.0000
Do not use Multiplier & Dilution Factor with ISTDs
  
```

Signal 1: VWD1 A, Wavelength=240 nm

| Peak # | RetTime [min] | Type | Width [min] | Area [mAU*s] | Height [mAU] | Area %  |
|--------|---------------|------|-------------|--------------|--------------|---------|
| 1      | 7.401         | BV   | 0.1128      | 2031.66479   | 273.12259    | 49.7983 |
| 2      | 7.778         | VB   | 0.1209      | 2048.12427   | 255.81441    | 50.2017 |

```
Totals :                4079.78906  528.93700
```

```

=====
*** End of Report ***
  
```

**Supplementary Figure 193: HPLC spectrum of (±)-3c.**

Sample Name: ZY-09-187-2-EE

```

=====
Acq. Operator   : 系统                               Seq. Line   :    4
Acq. Instrument : HPLC-1260                            Location    :   43
Injection Date  : 12/23/2021 9:54:02 AM              Inj         :    1
                                                    Inj Volume  : 3.000 µl
Different Inj Volume from Sample Entry! Actual Inj Volume : 0.400 µl
Acq. Method    : D:\zy\20211219\YH 2021-12-23 09-03-54\10EtOH-15-0.8-1-6-240.M
Last changed   : 12/23/2021 9:03:56 AM by 系统
Analysis Method : E:\DATA\20220316\LC 2022-03-16 22-19-08\0.6IPA-15-0.8-1-210-JXL.M (Sequence
                Method)
Last changed   : 3/29/2022 9:27:03 AM by SYSTEM
                (modified after loading)
    
```

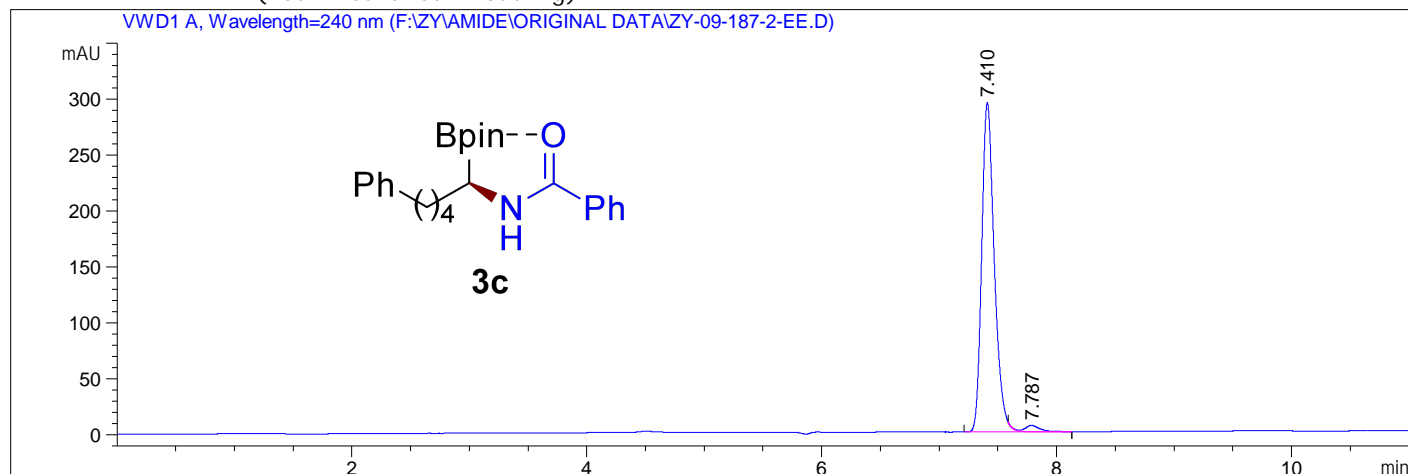

Area Percent Report

```

Sorted By      :      Signal
Multiplier     :      1.0000
Dilution      :      1.0000
Do not use Multiplier & Dilution Factor with ISTDs
    
```

Signal 1: VWD1 A, Wavelength=240 nm

| Peak # | RetTime [min] | Type | Width [min] | Area [mAU*s] | Height [mAU] | Area %  |
|--------|---------------|------|-------------|--------------|--------------|---------|
| 1      | 7.410         | BV R | 0.1140      | 2207.72168   | 294.35645    | 97.8049 |
| 2      | 7.787         | VB E | 0.1295      | 49.54852     | 5.61053      | 2.1951  |

Totals :                    2257.27020   299.96697

\*\*\* End of Report \*\*\*

**Supplementary Figure 194: HPLC spectrum of 3c.**

Sample Name: ZY-09-192-7-RAC

```

=====
Acq. Operator   : 系统                      Seq. Line   :    4
Acq. Instrument : HPLC-1260                  Location    :   82
Injection Date  : 3/1/2022 2:24:02 PM      Inj         :    1
                                           Inj Volume  : 3.000 µl
Different Inj Volume from Sample Entry! Actual Inj Volume : 0.600 µl
Acq. Method     : D:\zy\20220224\YH 2022-03-01 13-37-55\5I PA15_10-1-6-240.M
Last changed    : 3/1/2022 1:37:55 PM by 系统
Analysis Method : E:\DATA\20220316\LC 2022-03-16 22-19-08\10I PA-10-1.0-1.MZWJ.M (Sequence
                                           Method)
Last changed    : 3/29/2022 9:42:28 AM by SYSTEM
                                           (modified after Loading)
=====

```

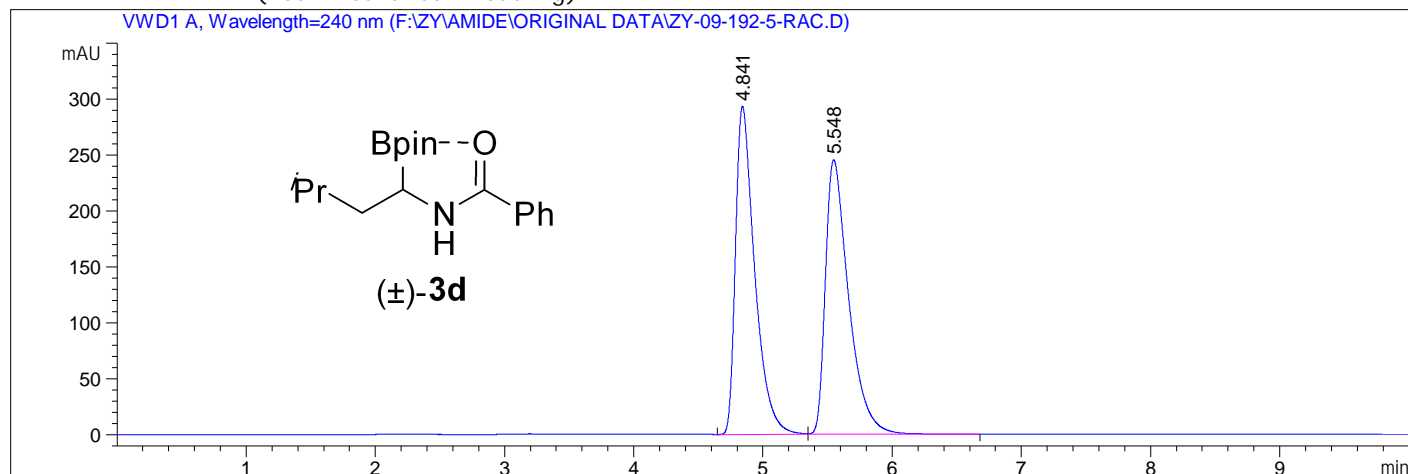

```

=====
Area Percent Report
=====

```

```

Sorted By      :      Signal
Multiplier     :      1.0000
Dilution       :      1.0000
Do not use Multiplier & Dilution Factor with ISTDs

```

Signal 1: VWD1 A, Wavelength=240 nm

| Peak # | RetTime [min] | Type | Width [min] | Area [mAU*s] | Height [mAU] | Area %  |
|--------|---------------|------|-------------|--------------|--------------|---------|
| 1      | 4.841         | BV   | 0.1531      | 3033.27930   | 293.32916    | 49.7162 |
| 2      | 5.548         | VB   | 0.1874      | 3067.90430   | 245.37120    | 50.2838 |

```
Totals :                6101.18359  538.70036
```

```

=====
*** End of Report ***
=====

```

**Supplementary Figure 195: HPLC spectrum of (±)-3d.**

Sample Name: ZY-09-192-5-EE

```

=====
Acq. Operator   : 系统                      Seq. Line   :    4
Acq. Instrument : HPLC-1260                   Location    :   81
Injection Date  : 3/1/2022 5:01:13 PM      Inj         :    1
                                           Inj Volume  : 3.000 µl
Different Inj Volume from Sample Entry! Actual Inj Volume : 1.200 µl
Acq. Method     : D:\zy\20220224\YH 2022-03-01 16-20-30\5I PA15_10-1-6-240.M
Last changed    : 3/1/2022 4:20:31 PM by 系统
Analysis Method : E:\DATA\20220316\LC 2022-03-16 22-19-08\10I PA-10-1.0-1.MZJ.M (Sequence
Method)
Last changed    : 3/29/2022 9:41:21 AM by SYSTEM
                 (modified after loading)
=====

```

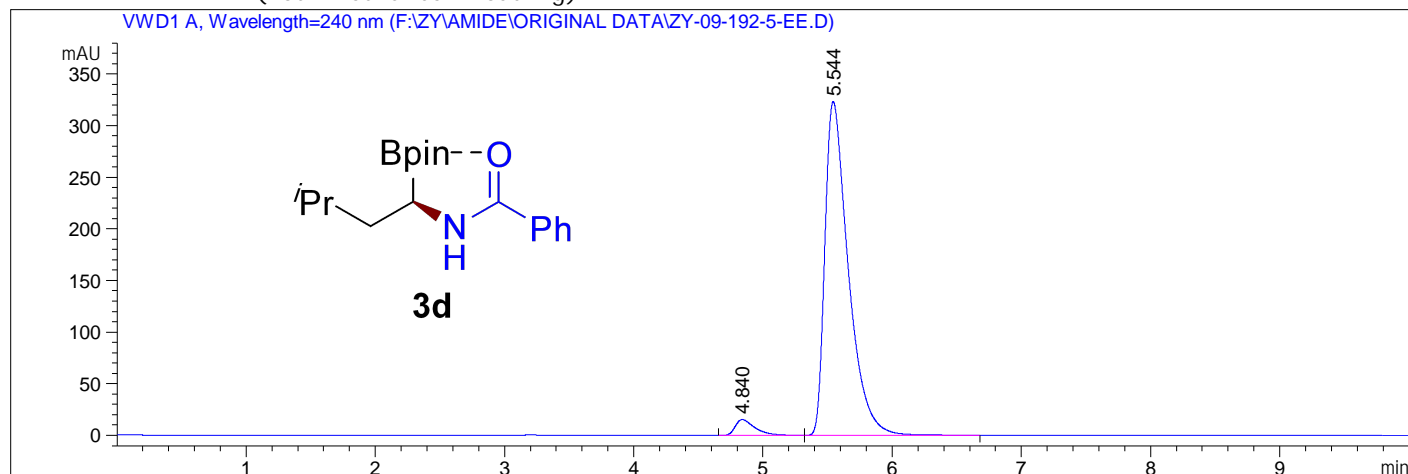

```

=====
Area Percent Report
=====

```

```

Sorted By       :      Signal
Multiplier      :      1.0000
Dilution        :      1.0000
Do not use Multiplier & Dilution Factor with ISTDs

```

Signal 1: VWD1 A, Wavelength=240 nm

| Peak # | RetTime [min] | Type | Width [min] | Area [mAU*s] | Height [mAU] | Area %  |
|--------|---------------|------|-------------|--------------|--------------|---------|
| 1      | 4.840         | BB   | 0.1574      | 163.37755    | 15.37929     | 3.8617  |
| 2      | 5.544         | BB   | 0.1893      | 4067.31079   | 323.30203    | 96.1383 |

```
Totals :                4230.68834  338.68133
```

```

=====
*** End of Report ***
=====

```

**Supplementary Figure 196: HPLC spectrum of 3d.**

Sample Name: ZY-10-43-EE

```

=====
Acq. Operator   : 系统                               Seq. Line :    3
Acq. Instrument : HPLC-1260                          Location  :   81
Injection Date  : 3/1/2022 2:07:38 PM                 Inj       :    1
                                                    Inj Volume: 3.000 µl
Different Inj Volume from Sample Entry! Actual Inj Volume : 0.600 µl
Acq. Method    : D:\zy\20220224\YH 2022-03-01 13-37-55\5I PA15_10-1-6-240.M
Last changed   : 3/1/2022 1:37:55 PM by 系统
Analysis Method: C:\CHEM32\1\METHODS\0.2I PA-10-0.5-1-XYH-EQ.M
Last changed   : 3/29/2022 10:09:24 AM by SYSTEM
                (modified after loading)
    
```

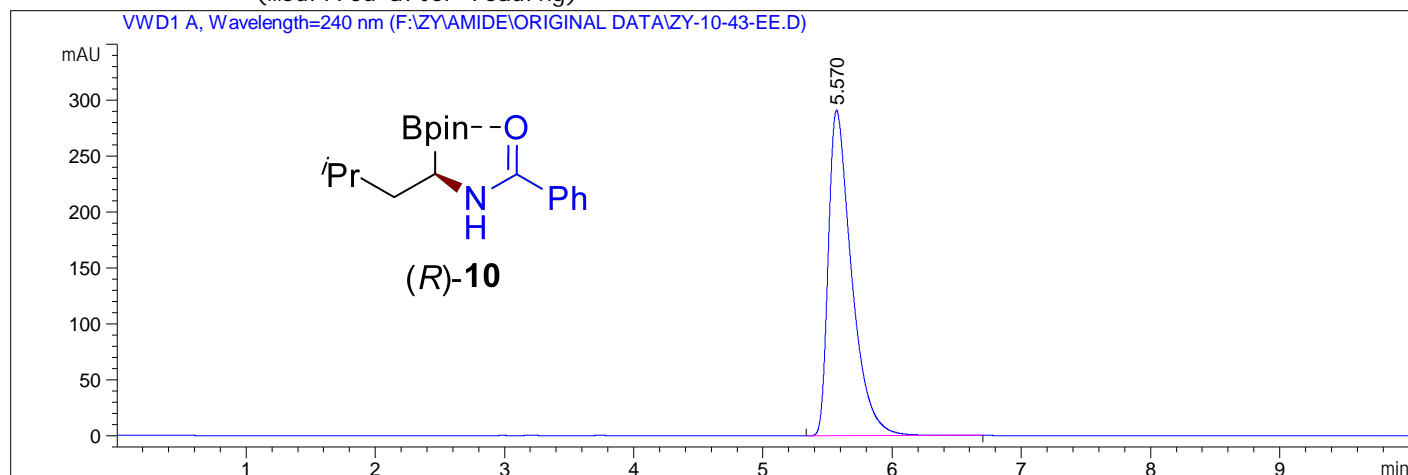

Area Percent Report

```

Sorted By      :      Signal
Multiplier     :      1.0000
Dilution       :      1.0000
Do not use Multiplier & Dilution Factor with ISTDs
    
```

Signal 1: VWD1 A, Wavelength=240 nm

| Peak # | RetTime [min] | Type | Width [min] | Area [mAU*s] | Height [mAU] | Area %   |
|--------|---------------|------|-------------|--------------|--------------|----------|
| 1      | 5.570         | BB   | 0.1852      | 3632.72119   | 290.84302    | 100.0000 |

Totals :                    3632.72119   290.84302

\*\*\* End of Report \*\*\*

Supplementary Figure 197: HPLC spectrum of (R)-10.

Sample Name: ZY-09-186-2-RAC

```

=====
Acq. Operator   : 系统                      Seq. Line :   10
Acq. Instrument : HPLC-1260                 Location  :   11
Injection Date  : 12/15/2021 11:47:34 AM    Inj       :    1
                                           Inj Volume: 3.000 µl
Different Inj Volume from Sample Entry! Actual Inj Volume : 0.800 µl
Acq. Method    : D:\zy\20211129\YH 2021-12-15 09-26-25\5IPA-15-1.0-1-6-254-ZH.M
Last changed   : 12/15/2021 11:14:11 AM by 系统
Analysis Method : E:\DATA\20220316\LC 2022-03-16 22-19-08\0.6IPA-15-0.8-1-210-JXL.M (Sequence
Method)
Last changed   : 3/29/2022 9:25:16 AM by SYSTEM
(modified after loading)
Additional Info : Peak(s) manually integrated
  
```

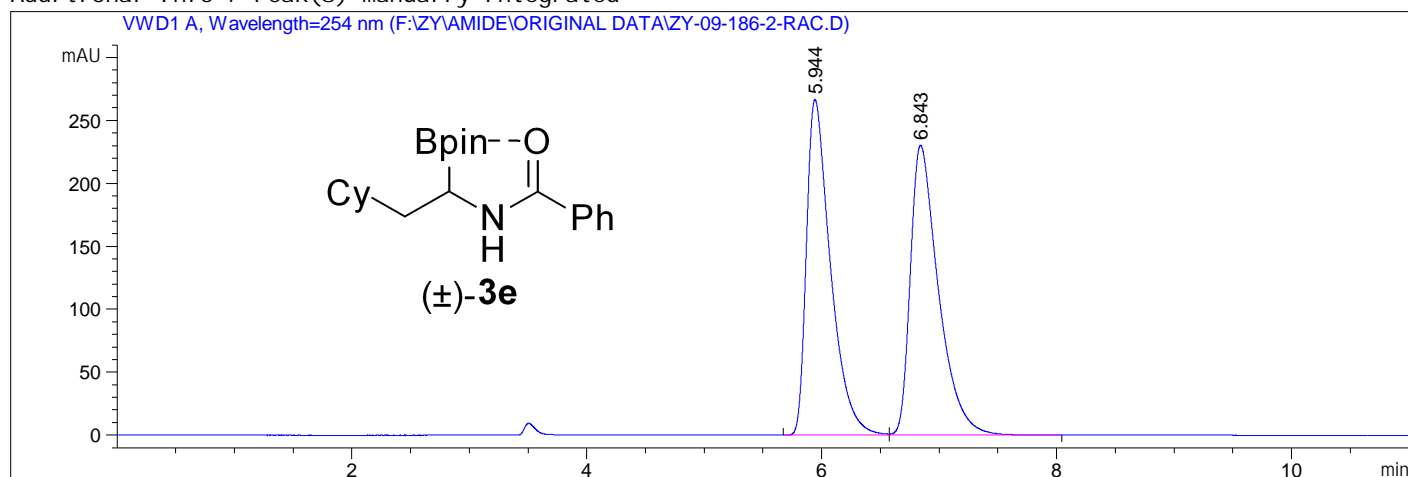

```

=====
                          Area Percent Report
=====
  
```

```

Sorted By      :      Signal
Multiplier     :      1.0000
Dilution       :      1.0000
Do not use Multiplier & Dilution Factor with ISTDs
  
```

Signal 1: VWD1 A, Wavelength=254 nm

| Peak # | RetTime [min] | Type | Width [min] | Area [mAU*s] | Height [mAU] | Area %  |
|--------|---------------|------|-------------|--------------|--------------|---------|
| 1      | 5.944         | BV   | 0.2142      | 3801.18140   | 266.80502    | 49.7416 |
| 2      | 6.843         | VB   | 0.2460      | 3840.67212   | 230.42453    | 50.2584 |

```
Totals :                      7641.85352  497.22955
```

```

=====
*** End of Report ***
  
```

**Supplementary Figure 198: HPLC spectrum of (±)-3e.**

Sample Name: ZY-09-186-2-EE

```

=====
Acq. Operator   : 系统                      Seq. Line :    9
Acq. Instrument : HPLC-1260                 Location  :   13
Injection Date  : 12/15/2021 11:31:08 AM    Inj       :    1
                                           Inj Volume: 3.000 µl
Different Inj Volume from Sample Entry! Actual Inj Volume : 1.200 µl
Acq. Method    : D:\zy\20211129\YH 2021-12-15 09-26-25\5IPA-15-1.0-1-6-254-ZH.M
Last changed   : 12/15/2021 11:14:11 AM by 系统
Analysis Method : E:\DATA\20220316\LC 2022-03-16 22-19-08\0.6IPA-15-0.8-1-210-JXL.M (Sequence
                Method)
Last changed   : 3/29/2022 9:24:40 AM by SYSTEM
                (modified after loading)
Additional Info : Peak(s) manually integrated
    
```

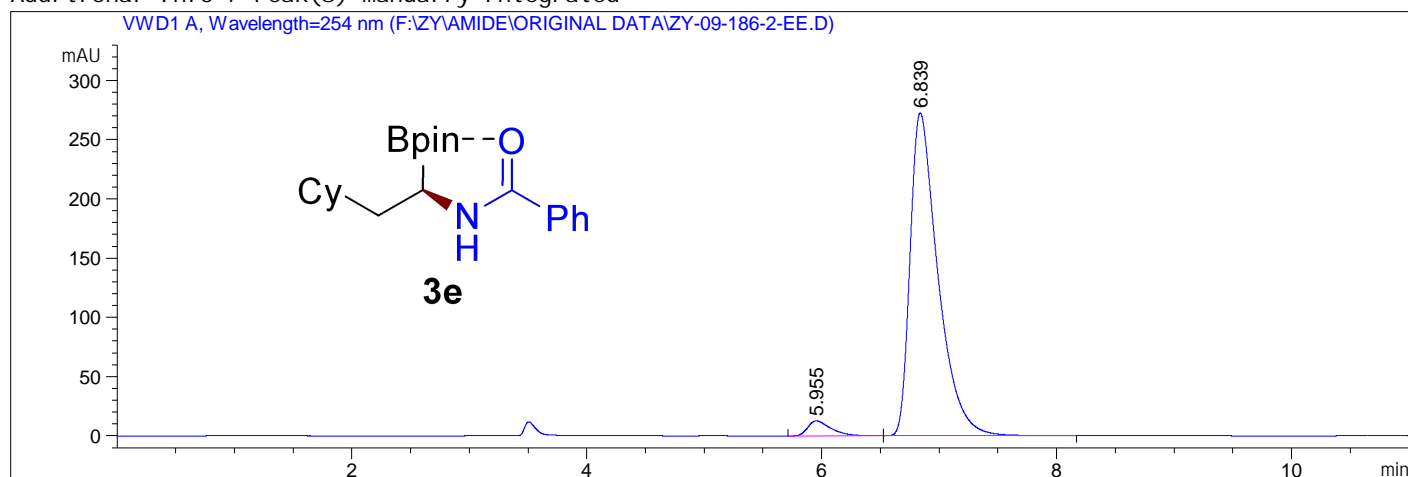

Area Percent Report

```

Sorted By      : Signal
Multiplier     : 1.0000
Dilution       : 1.0000
Do not use Multiplier & Dilution Factor with ISTDs
    
```

Signal 1: VWD1 A, Wavelength=254 nm

| Peak # | RetTime [min] | Type | Width [min] | Area [mAU*s] | Height [mAU] | Area %  |
|--------|---------------|------|-------------|--------------|--------------|---------|
| 1      | 5.955         | BB   | 0.2016      | 174.05440    | 12.64594     | 3.7263  |
| 2      | 6.839         | BB   | 0.2464      | 4496.94629   | 272.66776    | 96.2737 |

Totals : 4671.00069 285.31369

\*\*\* End of Report \*\*\*

Supplementary Figure 199: HPLC spectrum of 3e.

Sample Name: ZY-10-64-3-RAC

```

=====
Acq. Operator   : 系统                      Seq. Line :    7
Acq. Instrument : HPLC-1260                 Location  :   41
Injection Date  : 5/24/2022 7:49:56 PM      Inj       :    1
                                           Inj Volume: 3.000 µl
Different Inj Volume from Sample Entry! Actual Inj Volume : 0.200 µl
Acq. Method     : D:\zy\20220524\YH 2022-05-24 18-17-05\5Et0H15_10-1-2-240.M
Last changed    : 5/24/2022 7:13:28 PM by 系统
Analysis Method : E:\DATA\20220317\LC 2022-06-04 08-49-06\0.3IPA-0.3-60-220-1-CCP.M (Sequence
                  Method)
Last changed    : 6/7/2022 10:11:57 AM by SYSTEM
                  (modified after loading)
Additional Info  : Peak(s) manually integrated
  
```

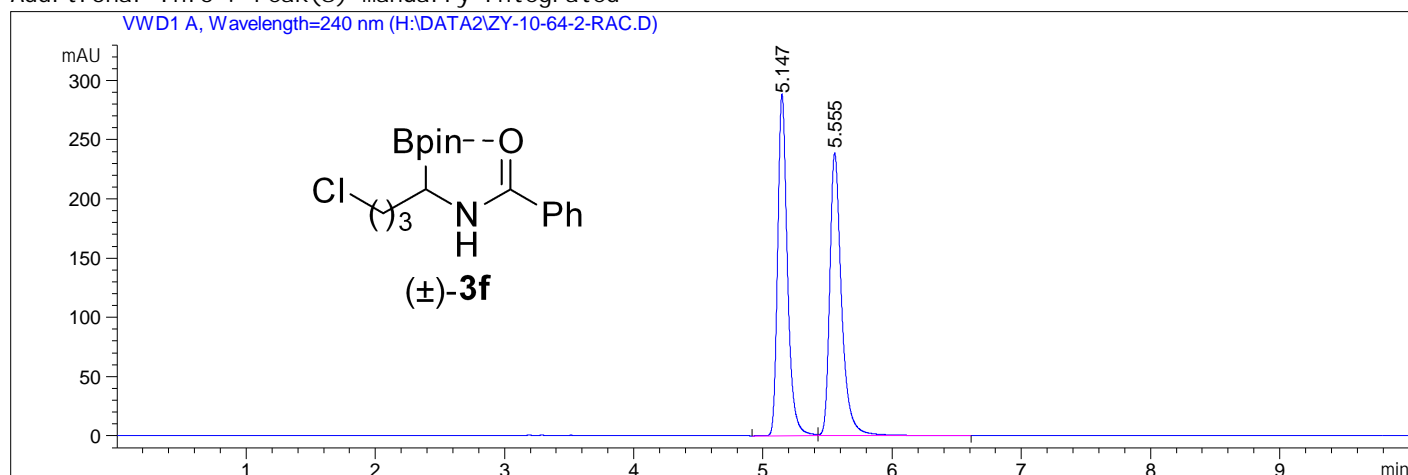

```

=====
Area Percent Report
=====
  
```

```

Sorted By      :      Signal
Multiplier     :      1.0000
Dilution       :      1.0000
Do not use Multiplier & Dilution Factor with ISTDs
  
```

Signal 1: VWD1 A, Wavelength=240 nm

| Peak # | RetTime [min] | Type | Width [min] | Area [mAU*s] | Height [mAU] | Area %  |
|--------|---------------|------|-------------|--------------|--------------|---------|
| 1      | 5.147         | VV R | 0.0792      | 1514.91614   | 288.64532    | 49.8930 |
| 2      | 5.555         | VB   | 0.0954      | 1521.41443   | 238.66467    | 50.1070 |

```
Totals :                3036.33057  527.31000
```

```

=====
*** End of Report ***
  
```

**Supplementary Figure 200: HPLC spectrum of (±)-3f.**



Sample Name: ZY-10-64-2-EE

```

=====
Acq. Operator   : 系统                      Seq. Line :    5
Acq. Instrument : HPLC-1260                 Location  :   42
Injection Date  : 5/24/2022 7:15:09 PM      Inj       :    2
                                           Inj Volume: 3.000 µl
Different Inj Volume from Sample Entry! Actual Inj Volume : 0.300 µl
Acq. Method     : D:\zy\20220524\YH 2022-05-24 18-17-05\5Et0H15_10-1-2-240.M
Last changed    : 5/24/2022 7:13:28 PM by 系统
Analysis Method : E:\DATA\20220317\LC 2022-06-04 08-49-06\0.31PA-0.3-60-220-1-CCP.M (Sequence
                    Method)
Last changed    : 6/7/2022 10:10:23 AM by SYSTEM
                    (modified after loading)
Additional Info : Peak(s) manually integrated
  
```

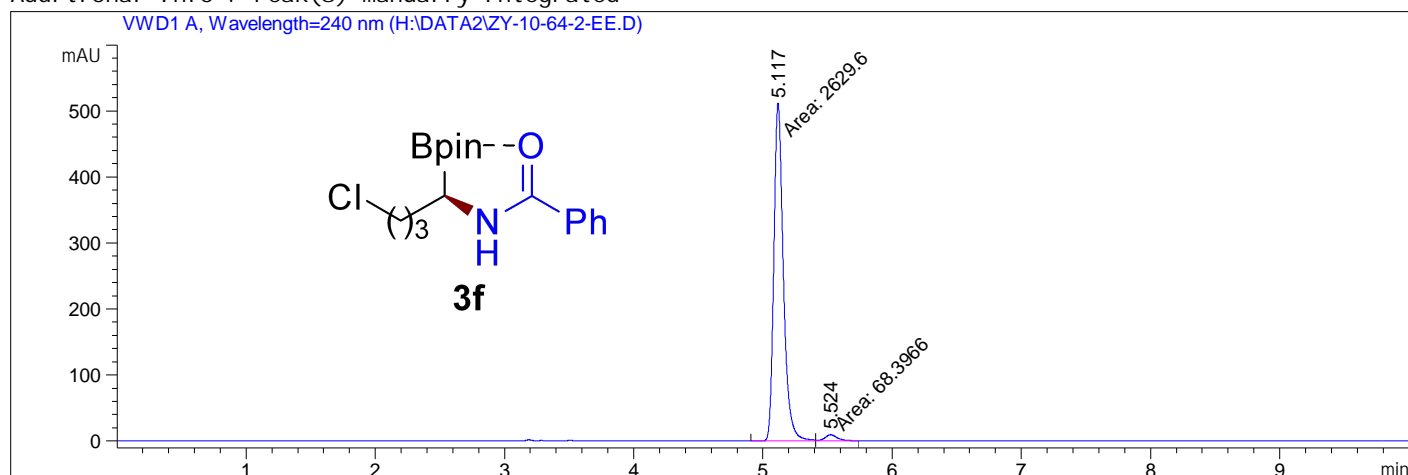

```

=====
Area Percent Report
=====
  
```

```

Sorted By      :      Signal
Multiplier     :      1.0000
Dilution       :      1.0000
Do not use Multiplier & Dilution Factor with ISTDs
  
```

Signal 1: VWD1 A, Wavelength=240 nm

| Peak # | RetTime [min] | Type | Width [min] | Area [mAU*s] | Height [mAU] | Area %  |
|--------|---------------|------|-------------|--------------|--------------|---------|
| 1      | 5.117         | MF   | 0.0856      | 2629.60010   | 512.06506    | 97.4649 |
| 2      | 5.524         | MF   | 0.1180      | 68.39656     | 9.66246      | 2.5351  |

```
Totals :                2697.99666  521.72753
```

```

=====
*** End of Report ***
  
```

**Supplementary Figure 201: HPLC spectrum of 3f.**

Sample Name: ZY-09-186-6-RAC

```

=====
Acq. Operator   : 系统                      Seq. Line :   32
Acq. Instrument : HPLC-1260                 Location  :    78
Injection Date  : 8/20/2022 5:00:51 PM      Inj       :    1
                                           Inj Volume: 3.000 µl
Different Inj Volume from Sample Entry! Actual Inj Volume : 1.600 µl
Acq. Method     : D:\zy\20220803\YH 2022-08-20 08-41-06\5I PA20_10-1-2-240.M
Last changed    : 8/20/2022 1:41:14 PM by 系统
Analysis Method : E:\DATA\20220317\LC 2022-08-22 08-37-45\5I PA-40-1.0-1-220-ODY.M (Sequence
Method)
Last changed    : 8/22/2022 7:02:33 PM by SYSTEM
                 (modified after loading)
Additional Info : Peak(s) manually integrated
  
```

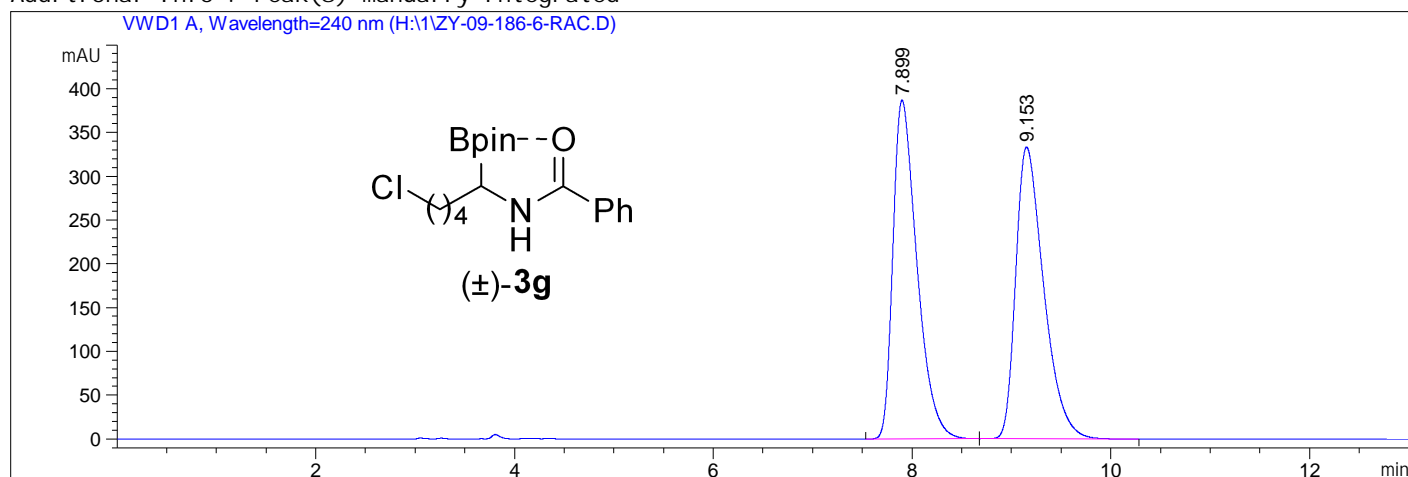

```

=====
Area Percent Report
=====
  
```

```

Sorted By      :      Signal
Multiplier     :      1.0000
Dilution       :      1.0000
Do not use Multiplier & Dilution Factor with ISTDs
  
```

Signal 1: VWD1 A, Wavelength=240 nm

| Peak # | RetTime [min] | Type | Width [min] | Area [mAU*s] | Height [mAU] | Area %  |
|--------|---------------|------|-------------|--------------|--------------|---------|
| 1      | 7.899         | BB   | 0.2586      | 6487.87744   | 387.00372    | 49.8193 |
| 2      | 9.153         | BB   | 0.2952      | 6534.93945   | 333.38983    | 50.1807 |

```
Totals :                1.30228e4  720.39355
```

```

=====
*** End of Report ***
  
```

**Supplementary Figure 202: HPLC spectrum of (±)-3g.**

Sample Name: ZY-09-186-6-EE

```

=====
Acq. Operator   : 系统                      Seq. Line :   30
Acq. Instrument : HPLC-1260                 Location  :   80
Injection Date  : 8/20/2022 4:28:28 PM      Inj       :    1
                                           Inj Volume: 3.000 µl
Different Inj Volume from Sample Entry! Actual Inj Volume : 1.500 µl
Acq. Method    : D:\zy\20220803\YH 2022-08-20 08-41-06\5I PA20_10-1-2-240.M
Last changed   : 8/20/2022 1:41:14 PM by 系统
Analysis Method : E:\DATA\20220317\LC 2022-08-22 08-37-45\5I PA-40-1.0-1-220-ODY.M (Sequence
                Method)
Last changed   : 8/22/2022 7:01:09 PM by SYSTEM
                (modified after loading)
Additional Info : Peak(s) manually integrated
  
```

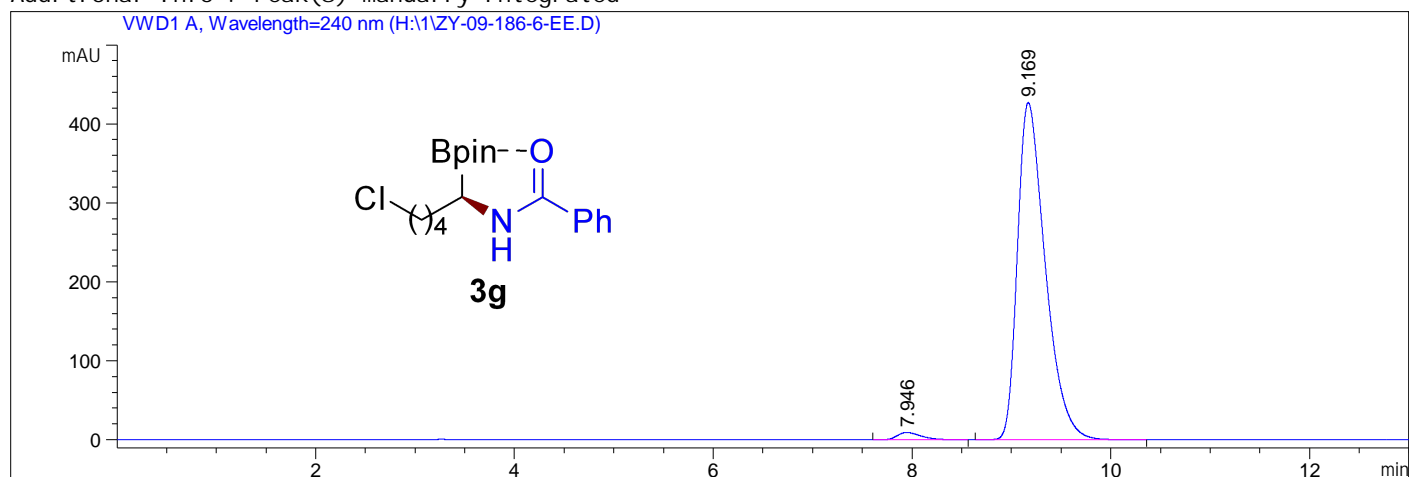

```

=====
                          Area Percent Report
=====
  
```

```

Sorted By      :      Signal
Multiplier     :      1.0000
Dilution       :      1.0000
Do not use Multiplier & Dilution Factor with ISTDs
  
```

Signal 1: VWD1 A, Wavelength=240 nm

| Peak # | RetTime [min] | Type | Width [min] | Area [mAU*s] | Height [mAU] | Area %  |
|--------|---------------|------|-------------|--------------|--------------|---------|
| 1      | 7.946         | BB   | 0.2433      | 155.65434    | 9.34727      | 1.8400  |
| 2      | 9.169         | BB   | 0.2853      | 8304.04688   | 427.10986    | 98.1600 |

```
Totals :                      8459.70122  436.45713
```

```

=====
*** End of Report ***
  
```

**Supplementary Figure 203: HPLC spectrum of 3g.**



Sample Name: ZY-09-187-6-EE

```

=====
Acq. Operator   : 系统                      Seq. Line   :   18
Acq. Instrument : HPLC-1260                 Location    :    61
Injection Date  : 12/24/2021 3:15:06 PM     Inj         :    1
                                           Inj Volume  : 3.000 µl
Different Inj Volume from Sample Entry! Actual Inj Volume : 0.400 µl
Acq. Method     : D:\zy\20211219\YH 2021-12-24 08-46-39\5EtOH15_8-1-2-240-.M
Last changed    : 12/24/2021 12:39:49 PM by 系统
Analysis Method : E:\DATA\20220316\LC 2022-03-16 22-19-08\0.6IPA-15-0.8-1-210-JXL.M (Sequence
                                           Method)
Last changed    : 3/29/2022 9:28:52 AM by SYSTEM
                                           (modified after loading)
=====
    
```

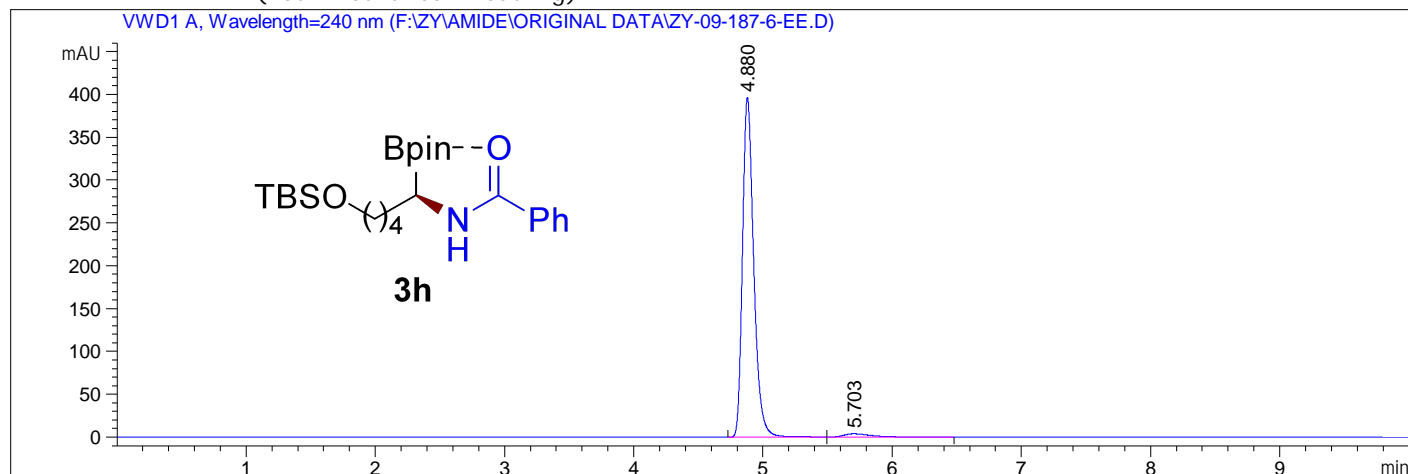

Area Percent Report

```

Sorted By      :      Signal
Multiplier     :      1.0000
Dilution       :      1.0000
Do not use Multiplier & Dilution Factor with ISTDs
    
```

Signal 1: VWD1 A, Wavelength=240 nm

| Peak # | RetTime [min] | Type | Width [min] | Area [mAU*s] | Height [mAU] | Area %  |
|--------|---------------|------|-------------|--------------|--------------|---------|
| 1      | 4.880         | BV R | 0.0919      | 2393.51636   | 396.38632    | 97.5608 |
| 2      | 5.703         | BB   | 0.2241      | 59.84169     | 3.93127      | 2.4392  |

Totals : 2453.35805 400.31759

\*\*\* End of Report \*\*\*

**Supplementary Figure 205: HPLC spectrum of 3h.**

Sample Name: ZY-09-168-5-RAC

```

=====
Acq. Operator   : SYSTEM                      Seq. Line :   61
Acq. Instrument : HPLC1260                   Location  : P1-E2
Injection Date  : 12/7/2021 6:44:55 PM      Inj       :    1
                                           Inj Volume: 3.000 µl
Different Inj Volume from Sample Entry! Actual Inj Volume : 0.500 µl
Acq. Method    : E:\DATA\20210920\LC 2021-12-06 14-33-37\5EtOH_15_10_4.M
Last changed   : 12/7/2021 5:06:46 PM by SYSTEM
Analysis Method : E:\DATA\20210920\LC 2021-12-06 14-33-37\5EtOH_15_10_4.M (Sequence Method)
Last changed   : 12/7/2021 9:56:54 PM by SYSTEM
                (modified after loading)
Additional Info : Peak(s) manually integrated
    
```

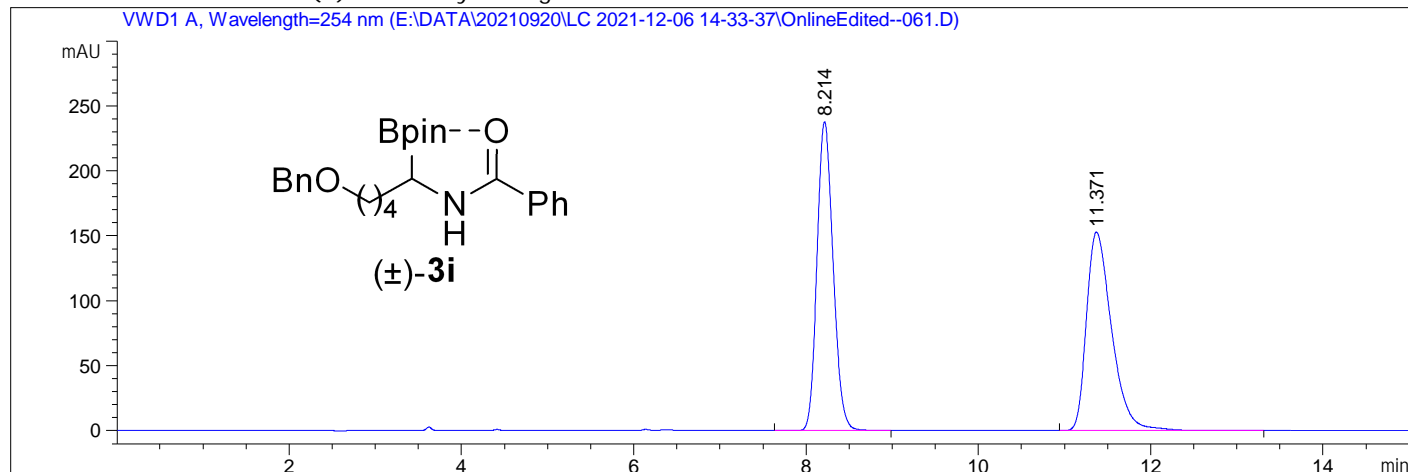

=====  
 Area Percent Report  
 =====

```

Sorted By      : Signal
Multiplier     : 1.0000
Dilution      : 1.0000
Do not use Multiplier & Dilution Factor with ISTDs
    
```

Signal 1: VWD1 A, Wavelength=254 nm

| Peak # | RetTime [min] | Type | Width [min] | Area [mAU*s] | Height [mAU] | Area %  |
|--------|---------------|------|-------------|--------------|--------------|---------|
| 1      | 8.214         | BB   | 0.2025      | 3088.16382   | 237.84897    | 49.9227 |
| 2      | 11.371        | BB   | 0.3116      | 3097.72485   | 152.74744    | 50.0773 |

Totals :                      6185.88867    390.59641

=====  
 \*\*\* End of Report \*\*\*

**Supplementary Figure 206: HPLC spectrum of (±)-3i.**

Sample Name: ZY-09-168-5-EE

```

=====
Acq. Operator   : SYSTEM                      Seq. Line :   72
Acq. Instrument : HPLC1260                   Location  : P1-E1
Injection Date  : 12/7/2021 9:40:07 PM       Inj       :    1
                                           Inj Volume: 3.000 µl
Different Inj Volume from Sample Entry! Actual Inj Volume : 0.800 µl
Acq. Method    : E:\DATA\20210920\LC 2021-12-06 14-33-37\5EtOH_15_10_4.M
Last changed   : 12/7/2021 9:19:59 PM by SYSTEM
Analysis Method: E:\DATA\20210920\LC 2021-12-06 14-33-37\5EtOH_15_10_4.M (Sequence Method)
Last changed   : 12/7/2021 9:56:16 PM by SYSTEM
                (modified after loading)
=====
    
```

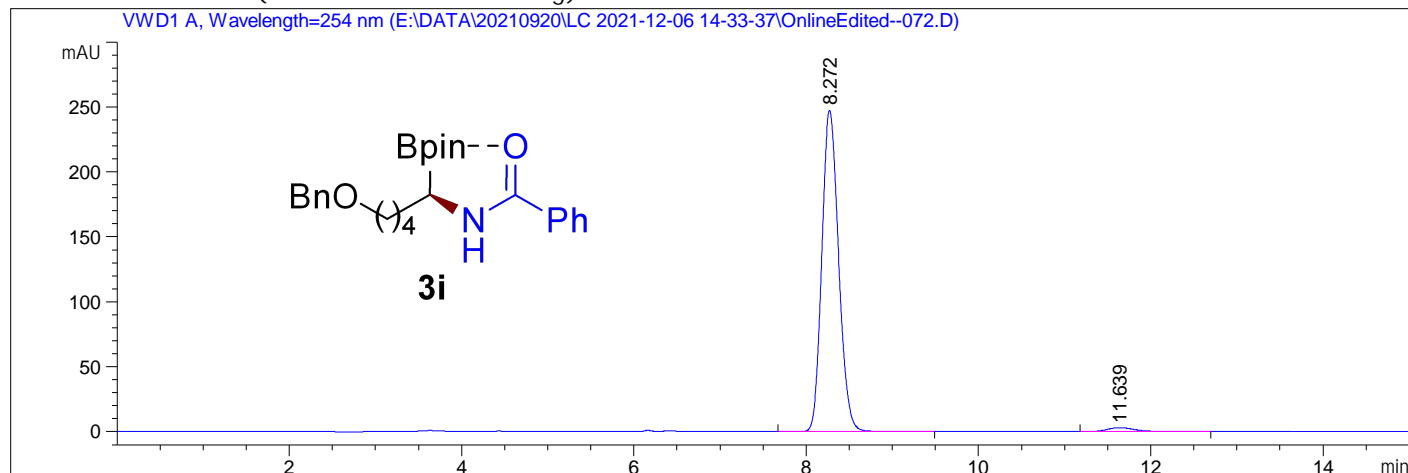

Area Percent Report

```

=====
Sorted By      : Signal
Multiplier     : 1.0000
Dilution       : 1.0000
Do not use Multiplier & Dilution Factor with ISTDs
    
```

Signal 1: VWD1 A, Wavelength=254 nm

| Peak # | RetTime [min] | Type | Width [min] | Area [mAU*s] | Height [mAU] | Area %  |
|--------|---------------|------|-------------|--------------|--------------|---------|
| 1      | 8.272         | BB   | 0.2106      | 3343.16821   | 247.41263    | 97.8705 |
| 2      | 11.639        | BB   | 0.3530      | 72.74094     | 3.13104      | 2.1295  |

Totals : 3415.90915 250.54367

\*\*\* End of Report \*\*\*

**Supplementary Figure 207: HPLC spectrum of 3i.**

Sample Name: ZY-09-192-2-RAC

```

=====
Acq. Operator   : 系统                      Seq. Line :   39
Acq. Instrument : HPLC-1260                 Location  :   72
Injection Date  : 8/20/2022 6:59:26 PM      Inj       :    1
                                           Inj Volume: 3.000 µl
Different Inj Volume from Sample Entry! Actual Inj Volume : 0.800 µl
Acq. Method     : D:\zy\20220803\YH 2022-08-20 08-41-06\10EtOH20_10-1-6-254.M
Last changed    : 8/20/2022 1:58:22 PM by 系统
Analysis Method : E:\DATA\20220317\LC 2022-08-22 08-37-45\5I PA-40-1.0-1-220-ODY.M (Sequence
                    Method)
Last changed    : 8/22/2022 7:14:35 PM by SYSTEM
                    (modified after loading)
Additional Info : Peak(s) manually integrated
  
```

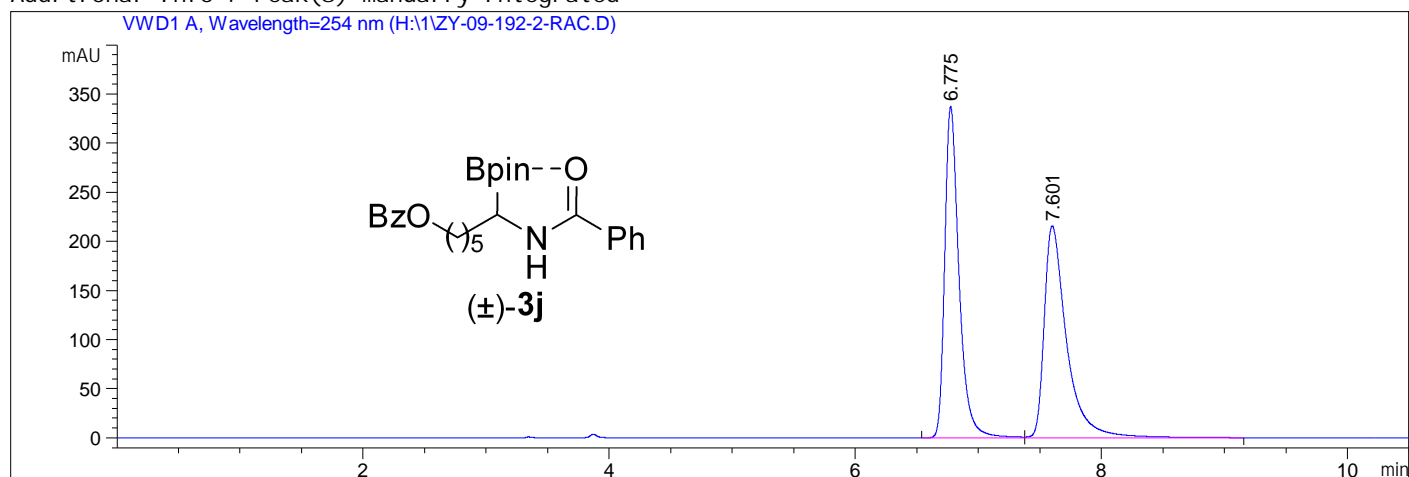

```

=====
Area Percent Report
=====
  
```

```

Sorted By      :      Signal
Multiplier     :      1.0000
Dilution       :      1.0000
Do not use Multiplier & Dilution Factor with ISTDs
  
```

Signal 1: VWD1 A, Wavelength=254 nm

| Peak # | RetTime [min] | Type | Width [min] | Area [mAU*s] | Height [mAU] | Area %  |
|--------|---------------|------|-------------|--------------|--------------|---------|
| 1      | 6.775         | BV   | 0.1214      | 2731.93823   | 337.47751    | 49.9922 |
| 2      | 7.601         | VB   | 0.1882      | 2732.78638   | 215.87651    | 50.0078 |

```
Totals :                5464.72461  553.35402
```

```

=====
*** End of Report ***
  
```

**Supplementary Figure 208: HPLC spectrum of (±)-3j.**



Sample Name: ZY-09-192-2-EE

```

=====
Acq. Operator   : 系统                      Seq. Line :   38
Acq. Instrument : HPLC-1260                 Location  :   71
Injection Date  : 8/20/2022 6:37:59 PM      Inj       :    1
                                           Inj Volume: 3.000 µl
Different Inj Volume from Sample Entry! Actual Inj Volume : 0.800 µl
Acq. Method     : D:\zy\20220803\YH 2022-08-20 08-41-06\10EtOH2O_10-1-6-254.M
Last changed    : 8/20/2022 1:58:22 PM by 系统
Analysis Method : E:\DATA\20220317\LC 2022-08-22 08-37-45\5I PA-40-1.0-1-220-ODY.M (Sequence
                    Method)
Last changed    : 8/22/2022 7:12:33 PM by SYSTEM
                    (modified after loading)
Additional Info : Peak(s) manually integrated
  
```

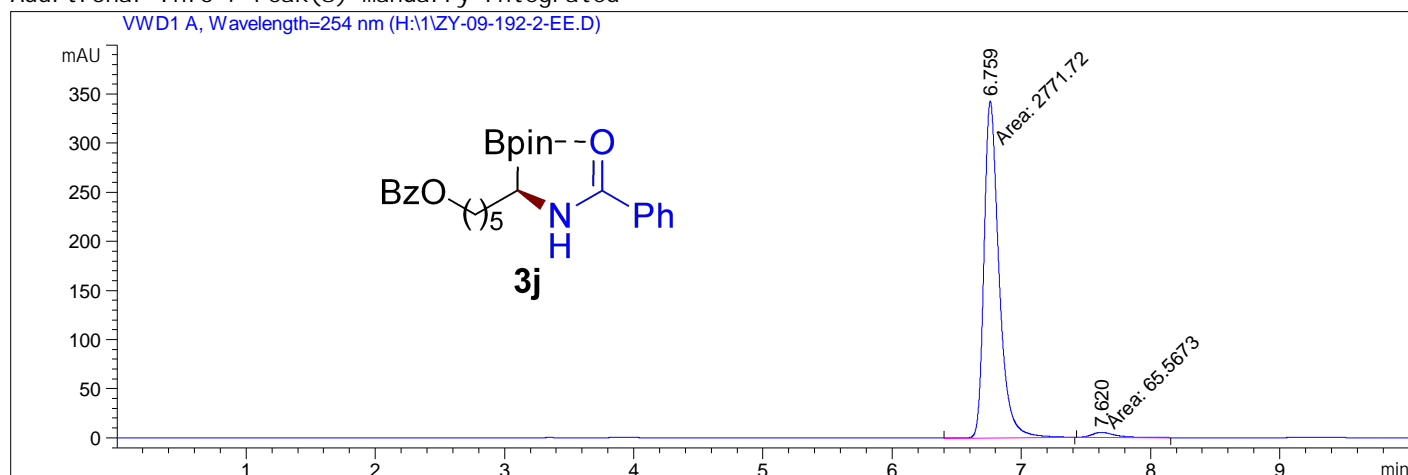

```

=====
Area Percent Report
=====
  
```

```

Sorted By      :      Signal
Multiplier     :      1.0000
Dilution       :      1.0000
Do not use Multiplier & Dilution Factor with ISTDs
  
```

Signal 1: VWD1 A, Wavelength=254 nm

| Peak # | RetTime [min] | Type | Width [min] | Area [mAU*s] | Height [mAU] | Area %  |
|--------|---------------|------|-------------|--------------|--------------|---------|
| 1      | 6.759         | MM   | 0.1347      | 2771.72437   | 342.95248    | 97.6891 |
| 2      | 7.620         | MM   | 0.2110      | 65.56731     | 5.17876      | 2.3109  |

```
Totals :                2837.29167  348.13124
```

```

=====
*** End of Report ***
  
```

**Supplementary Figure 209: HPLC spectrum of 3j.**



```

=====
Acq. Operator   : 系统                      Seq. Line :   24
Acq. Instrument : HPLC-1260                 Location  :   75
Injection Date  : 8/19/2022 9:19:43 PM      Inj       :    1
                                           Inj Volume: 3.000 µl
Different Inj Volume from Sample Entry! Actual Inj Volume : 3.200 µl
Acq. Method    : D:\zy\20220803\YH 2022-08-19 14-14-07\20EtOH20_10-1-2-254.M
Last changed   : 8/19/2022 2:14:07 PM by 系统
Analysis Method : E:\DATA\20220317\LC 2022-08-19 14-05-28\10IPA_10_8_3.M (Sequence Method)
Last changed   : 8/19/2022 10:26:56 PM by SYSTEM
                (modified after loading)
Additional Info : Peak(s) manually integrated
  
```

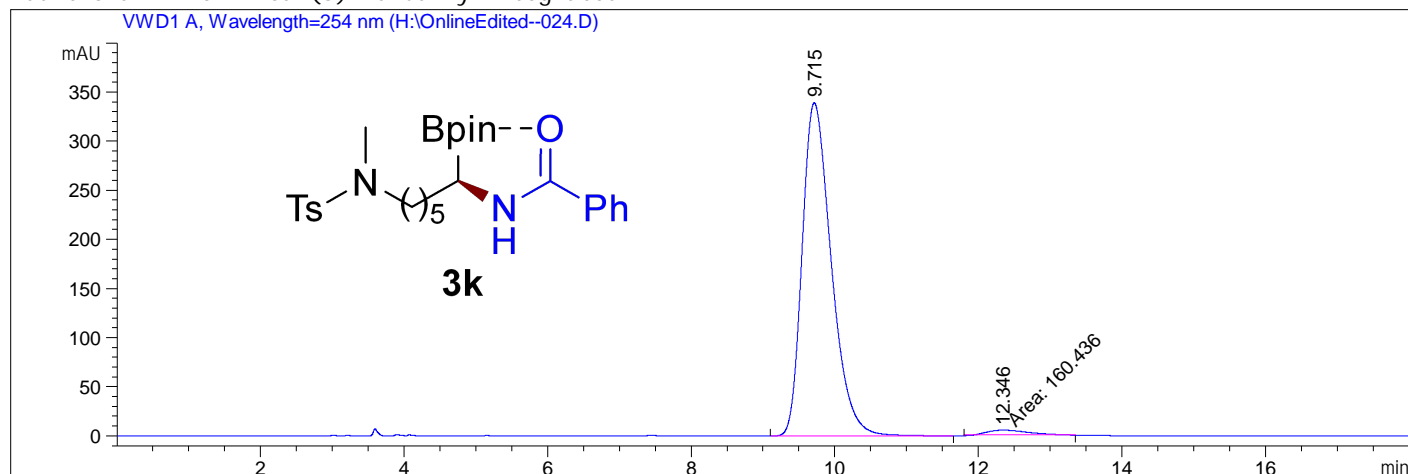

```

=====
Area Percent Report
=====
  
```

```

Sorted By      :      Signal
Multiplier     :      1.0000
Dilution      :      1.0000
Do not use Multiplier & Dilution Factor with ISTDs
  
```

Signal 1: VWD1 A, Wavelength=254 nm

| Peak # | RetTime [min] | Type | Width [min] | Area [mAU*s] | Height [mAU] | Area %  |
|--------|---------------|------|-------------|--------------|--------------|---------|
| 1      | 9.715         | BB   | 0.4357      | 9538.70508   | 339.05954    | 98.3459 |
| 2      | 12.346        | MM   | 0.5951      | 160.43559    | 4.49287      | 1.6541  |

```
Totals :                      9699.14067  343.55241
```

```

=====
*** End of Report ***
  
```

**Supplementary Figure 211: HPLC spectrum of 3k.**

Sample Name: ZY-10-12-12-RAC

```

=====
Acq. Operator   : 系统                      Seq. Line :    9
Acq. Instrument : HPLC-1260                 Location  :   81
Injection Date  : 3/14/2022 8:10:38 PM      Inj       :    1
                                           Inj Volume: 3.000 µl
Different Inj Volume from Sample Entry! Actual Inj Volume : 1.200 µl
Acq. Method    : D:\zy\20220302\YH 2022-03-14 18-14-35\81PA20_8-1-2-240.M
Last changed   : 3/14/2022 7:50:44 PM by 系统
Analysis Method : E:\DATA\20220316\LC 2022-03-16 22-19-08\101PA-10-1.0-1.MZJ.M (Sequence
Method)
Last changed   : 3/29/2022 9:59:19 AM by SYSTEM
                (modified after loading)
Additional Info : Peak(s) manually integrated
  
```

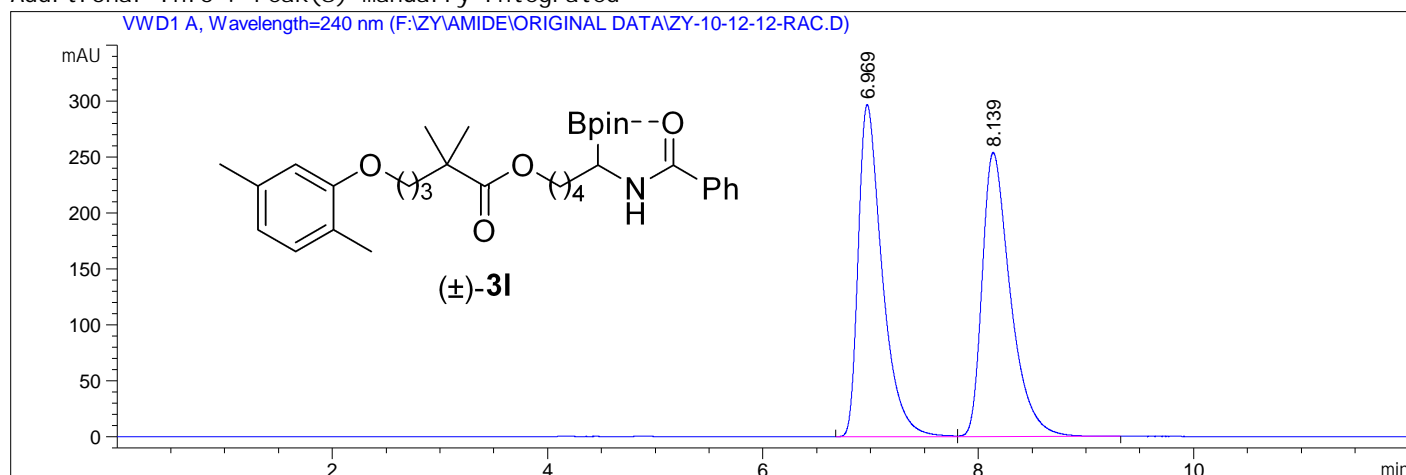

```

=====
                          Area Percent Report
=====
  
```

```

Sorted By      :      Signal
Multiplier     :      1.0000
Dilution      :      1.0000
Do not use Multiplier & Dilution Factor with ISTDs
  
```

Signal 1: VWD1 A, Wavelength=240 nm

| Peak # | RetTime [min] | Type | Width [min] | Area [mAU*s] | Height [mAU] | Area %  |
|--------|---------------|------|-------------|--------------|--------------|---------|
| 1      | 6.969         | BV   | 0.2315      | 4579.07910   | 296.74182    | 49.7372 |
| 2      | 8.139         | VB   | 0.2682      | 4627.47461   | 253.77185    | 50.2628 |

```
Totals :                      9206.55371  550.51367
```

```

=====
*** End of Report ***
  
```

**Supplementary Figure 212: HPLC spectrum of (±)-31.**

Sample Name: ZY-10-12-12-EE

```

=====
Acq. Operator   : 系统                      Seq. Line :    8
Acq. Instrument : HPLC-1260                 Location  :   82
Injection Date  : 3/14/2022 7:52:12 PM      Inj       :    1
                                           Inj Volume: 3.000 µl
Different Inj Volume from Sample Entry! Actual Inj Volume : 0.600 µl
Acq. Method     : D:\zy\20220302\YH 2022-03-14 18-14-35\8IPA20_8-1-2-240.M
Last changed    : 3/14/2022 7:50:44 PM by 系统
Analysis Method : E:\DATA\20220316\LC 2022-03-16 22-19-08\10IPA-10-1.0-1.MZWJ.M (Sequence
                    Method)
Last changed    : 3/29/2022 9:59:57 AM by SYSTEM
                    (modified after loading)
Additional Info : Peak(s) manually integrated
    
```

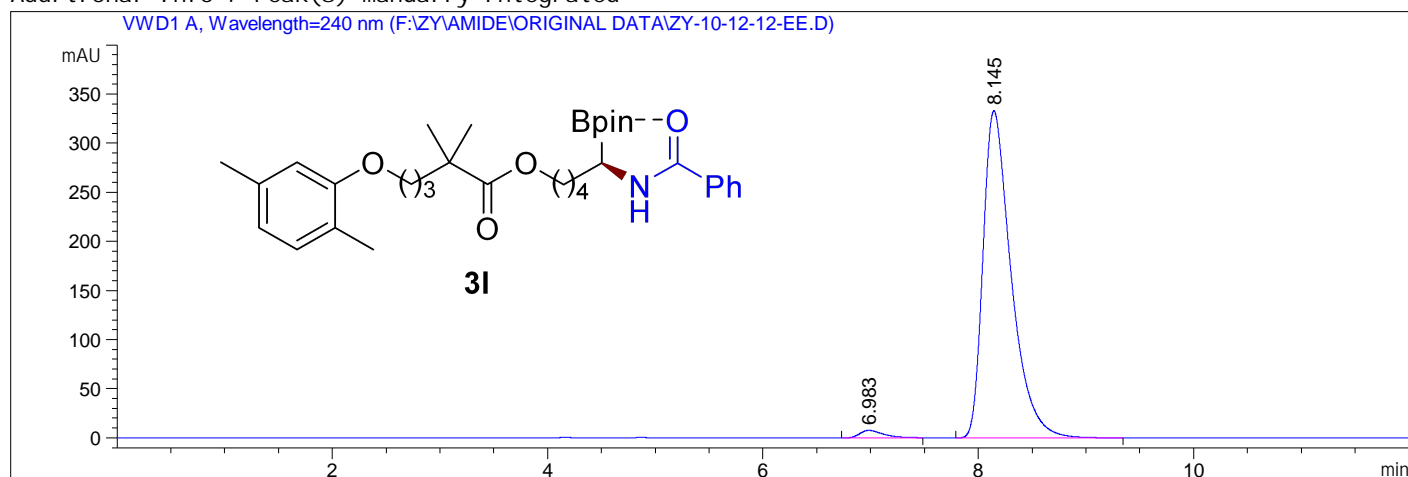

Area Percent Report

```

Sorted By      :      Signal
Multiplier     :      1.0000
Dilution       :      1.0000
Do not use Multiplier & Dilution Factor with ISTDs
    
```

Signal 1: VWD1 A, Wavelength=240 nm

| Peak # | RetTime [min] | Type | Width [min] | Area [mAU*s] | Height [mAU] | Area %  |
|--------|---------------|------|-------------|--------------|--------------|---------|
| 1      | 6.983         | BB   | 0.2180      | 115.32585    | 7.70988      | 1.8705  |
| 2      | 8.145         | BB   | 0.2674      | 6050.16260   | 333.05563    | 98.1295 |

Totals :                    6165.48845   340.76552

\*\*\* End of Report \*\*\*

Supplementary Figure 213: HPLC spectrum of 31.

Sample Name: ZY-10-24-5-RAC

```

=====
Acq. Operator   : 系统                      Seq. Line : 27
Acq. Instrument : HPLC-1260                 Location  : 71
Injection Date  : 2/14/2022 10:13:51 PM    Inj       : 1
                                           Inj Volume: 3.000 µl
Different Inj Volume from Sample Entry! Actual Inj Volume : 0.600 µl
Acq. Method     : D:\zy\20220201\YH 2022-02-14 12-55-19\15EtOH30_10-1-2-254.M
Last changed    : 2/14/2022 9:50:04 PM by 系统
Analysis Method : E:\DATA\20220316\LC 2022-03-16 22-19-08\10IPA-10-1.0-1.MZWJ.M (Sequence
                    Method)
Last changed    : 3/29/2022 10:02:54 AM by SYSTEM
                    (modified after loading)
Additional Info : Peak(s) manually integrated
    
```

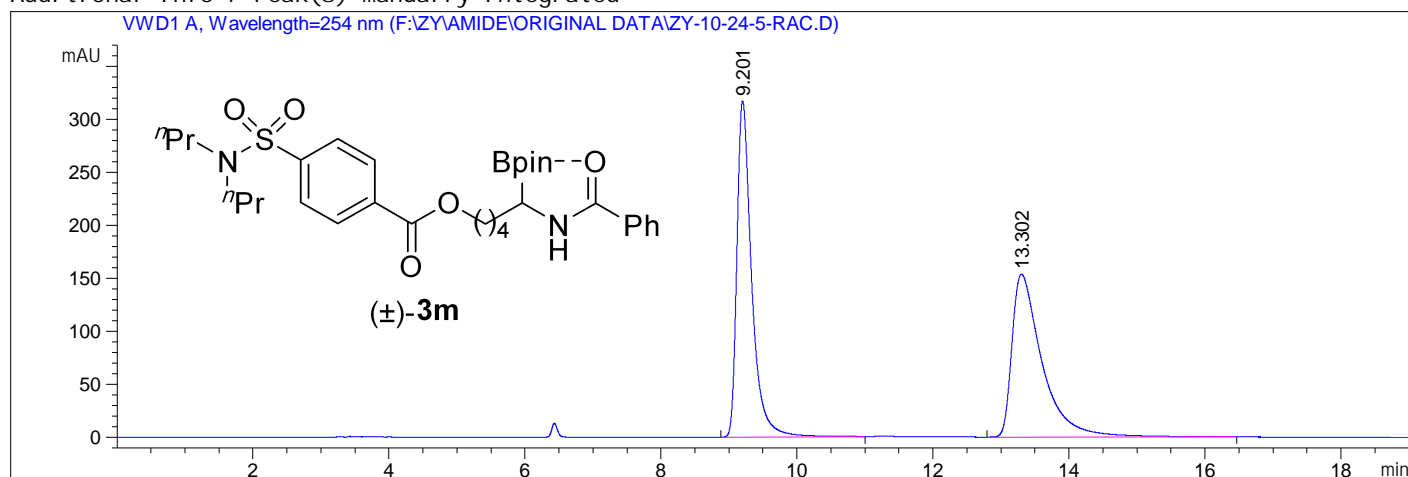

Area Percent Report

```

Sorted By      : Signal
Multiplier     : 1.0000
Dilution       : 1.0000
Do not use Multiplier & Dilution Factor with ISTDs
    
```

Signal 1: VWD1 A, Wavelength=254 nm

| Peak # | RetTime [min] | Type | Width [min] | Area [mAU*s] | Height [mAU] | Area %  |
|--------|---------------|------|-------------|--------------|--------------|---------|
| 1      | 9.201         | BB   | 0.2237      | 4765.29834   | 317.25735    | 50.2247 |
| 2      | 13.302        | BB   | 0.4520      | 4722.66553   | 153.67970    | 49.7753 |

Totals : 9487.96387 470.93706

\*\*\* End of Report \*\*\*

**Supplementary Figure 214: HPLC spectrum of (±)-3m.**

Sample Name: ZY-10-24-5-EE

```

=====
Acq. Operator   : 系统                      Seq. Line :   26
Acq. Instrument : HPLC-1260                 Location  :    72
Injection Date  : 2/14/2022 9:51:27 PM      Inj       :    1
                                           Inj Volume: 3.000 µl
Different Inj Volume from Sample Entry! Actual Inj Volume : 0.600 µl
Acq. Method    : D:\zy\20220201\YH 2022-02-14 12-55-19\15EtOH30_10-1-2-254.M
Last changed   : 2/14/2022 9:50:04 PM by 系统
Analysis Method : E:\DATA\20220316\LC 2022-03-16 22-19-08\10IPA-10-1.0-1.MZWJ.M (Sequence
                    Method)
Last changed   : 3/29/2022 10:02:54 AM by SYSTEM
                    (modified after loading)
Additional Info : Peak(s) manually integrated
    
```

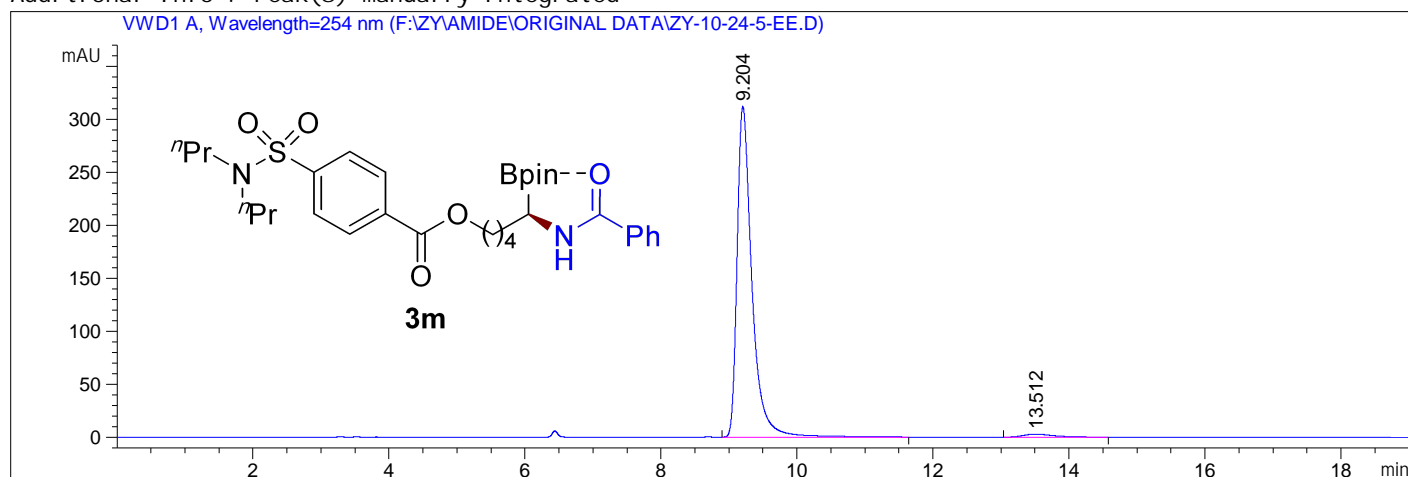

Area Percent Report

```

Sorted By      :      Signal
Multiplier     :      1.0000
Dilution       :      1.0000
Do not use Multiplier & Dilution Factor with ISTDs
    
```

Signal 1: VWD1 A, Wavelength=254 nm

| Peak # | RetTime [min] | Type | Width [min] | Area [mAU*s] | Height [mAU] | Area %  |
|--------|---------------|------|-------------|--------------|--------------|---------|
| 1      | 9.204         | BB   | 0.2267      | 4723.18945   | 311.85480    | 98.1437 |
| 2      | 13.512        | BB   | 0.3615      | 89.33582     | 2.91907      | 1.8563  |

Totals : 4812.52527 314.77387

\*\*\* End of Report \*\*\*

Supplementary Figure 215: HPLC spectrum of 3m.

Sample Name: ZY-10-25-RAC

```

=====
Acq. Operator   : 系统                      Seq. Line :   35
Acq. Instrument : HPLC-1260                 Location  :   81
Injection Date  : 2/15/2022 12:45:00 AM     Inj       :    1
                                           Inj Volume: 3.000 µl
Different Inj Volume from Sample Entry! Actual Inj Volume : 1.000 µl
Acq. Method    : D:\zy\20220201\YH 2022-02-14 12-55-19\5I PA15_10-1-6-240.M
Last changed   : 2/14/2022 9:25:27 PM by 系统
Analysis Method : E:\DATA\20220316\LC 2022-03-16 22-19-08\10I PA-10-1.0-1.MZWJ.M (Sequence
                                           Method)
Last changed   : 3/29/2022 10:04:39 AM by SYSTEM
                                           (modified after loading)
=====

```

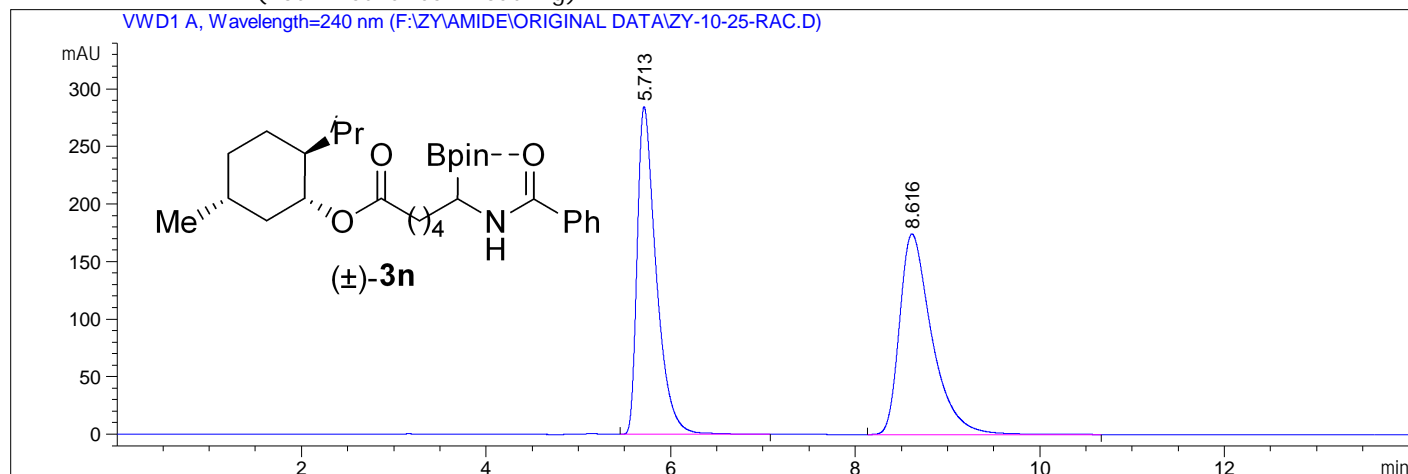

```

=====
Area Percent Report
=====

```

```

Sorted By      :      Signal
Multiplier     :      1.0000
Dilution      :      1.0000
Do not use Multiplier & Dilution Factor with ISTDs

```

Signal 1: VWD1 A, Wavelength=240 nm

| Peak # | RetTime [min] | Type | Width [min] | Area [mAU*s] | Height [mAU] | Area %  |
|--------|---------------|------|-------------|--------------|--------------|---------|
| 1      | 5.713         | BB   | 0.2128      | 4071.67749   | 284.85623    | 49.0033 |
| 2      | 8.616         | BB   | 0.3652      | 4237.30811   | 174.26460    | 50.9967 |

```
Totals :                8308.98560  459.12083
```

```

=====
*** End of Report ***
=====

```

**Supplementary Figure 216: HPLC spectrum of (±)-3n.**



Sample Name: ZY-10-25-2-EE

```

=====
Acq. Operator   : 系统                      Seq. Line :   32
Acq. Instrument : HPLC-1260                 Location  :   83
Injection Date  : 2/14/2022 11:55:42 PM      Inj       :    1
                                           Inj Volume: 3.000 µl
Different Inj Volume from Sample Entry! Actual Inj Volume : 0.800 µl
Acq. Method    : D:\zy\20220201\YH 2022-02-14 12-55-19\5I PA15_10-1-6-240.M
Last changed   : 2/14/2022 9:25:27 PM by 系统
Analysis Method : E:\DATA\20220316\LC 2022-03-16 22-19-08\10I PA-10-1.0-1.MZWJ.M (Sequence
Method)
Last changed   : 3/29/2022 10:04:39 AM by SYSTEM
                (modified after loading)
=====

```

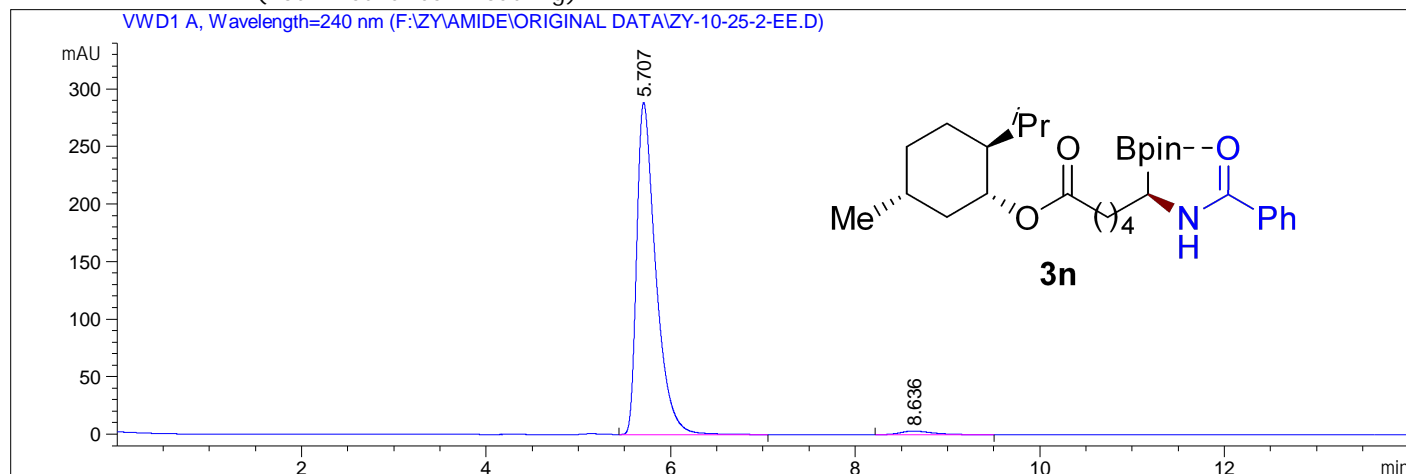

```

=====
Area Percent Report
=====

```

```

Sorted By      :      Signal
Multiplier     :      1.0000
Dilution       :      1.0000
Do not use Multiplier & Dilution Factor with ISTDs

```

Signal 1: VWD1 A, Wavelength=240 nm

| Peak # | RetTime [min] | Type | Width [min] | Area [mAU*s] | Height [mAU] | Area %  |
|--------|---------------|------|-------------|--------------|--------------|---------|
| 1      | 5.707         | BB   | 0.2122      | 4119.90674   | 288.39926    | 98.2076 |
| 2      | 8.636         | BB   | 0.2825      | 75.19337     | 3.14431      | 1.7924  |

```
Totals :                4195.10011  291.54357
```

```

=====
*** End of Report ***
=====

```

**Supplementary Figure 217: HPLC spectrum of 3n.**

Sample Name: ZY-10-25-5-EE

```

=====
Acq. Operator   : 系统                      Seq. Line :   33
Acq. Instrument : HPLC-1260                 Location  :   82
Injection Date  : 2/15/2022 12:12:05 AM     Inj       :    1
                                           Inj Volume: 3.000 µl
Different Inj Volume from Sample Entry! Actual Inj Volume : 1.400 µl
Acq. Method    : D:\zy\20220201\YH 2022-02-14 12-55-19\5I PA15_10-1-6-240.M
Last changed   : 2/14/2022 9:25:27 PM by 系统
Analysis Method : E:\DATA\20220316\LC 2022-03-16 22-19-08\10I PA-10-1.0-1.MZWJ.M (Sequence
Method)
Last changed   : 3/29/2022 10:04:39 AM by SYSTEM
                (modified after loading)
=====

```

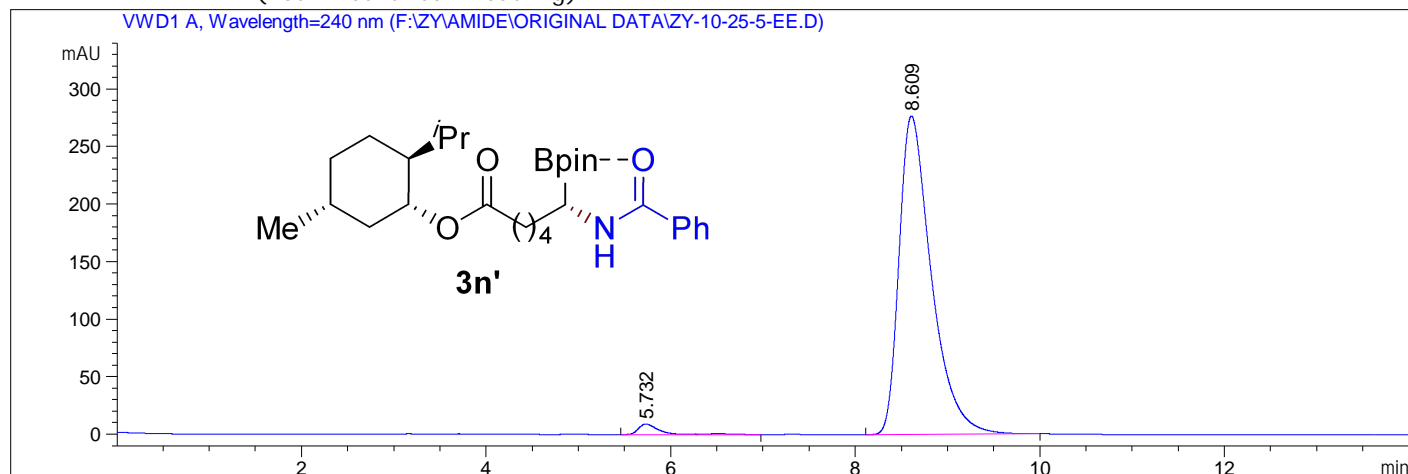

```

=====
Area Percent Report
=====

```

```

Sorted By      :      Signal
Multiplier     :      1.0000
Dilution       :      1.0000
Do not use Multiplier & Dilution Factor with ISTDs

```

Signal 1: VWD1 A, Wavelength=240 nm

| Peak # | RetTime [min] | Type | Width [min] | Area [mAU*s] | Height [mAU] | Area %  |
|--------|---------------|------|-------------|--------------|--------------|---------|
| 1      | 5.732         | BV R | 0.2280      | 143.65533    | 9.10710      | 2.0901  |
| 2      | 8.609         | BB   | 0.3617      | 6729.62012   | 276.75131    | 97.9099 |

```
Totals :                6873.27545  285.85841
```

```

=====
*** End of Report ***
=====

```

**Supplementary Figure 218: HPLC spectrum of 3n'.**

Sample Name: ZY-10-91-3-RAC

```

=====
Acq. Operator   : 系统                      Seq. Line :    5
Acq. Instrument : HPLC-1260                 Location  :   81
Injection Date  : 6/26/2022 3:12:35 PM      Inj       :    1
                                           Inj Volume: 3.000 µl
Different Inj Volume from Sample Entry! Actual Inj Volume : 0.600 µl
Acq. Method     : D:\zy\20220624\YH 2022-06-26 14-05-25\12EtOH2O_10-1-2-240.M
Last changed    : 6/26/2022 2:05:25 PM by 系统
Analysis Method : E:\DATA\20220317\LC 2022-08-08 20-30-16\2I PA-50-0.8-3-210-JXL.M (Sequence
Method)
Last changed    : 8/9/2022 9:05:21 AM by SYSTEM
                 (modified after loading)
=====

```

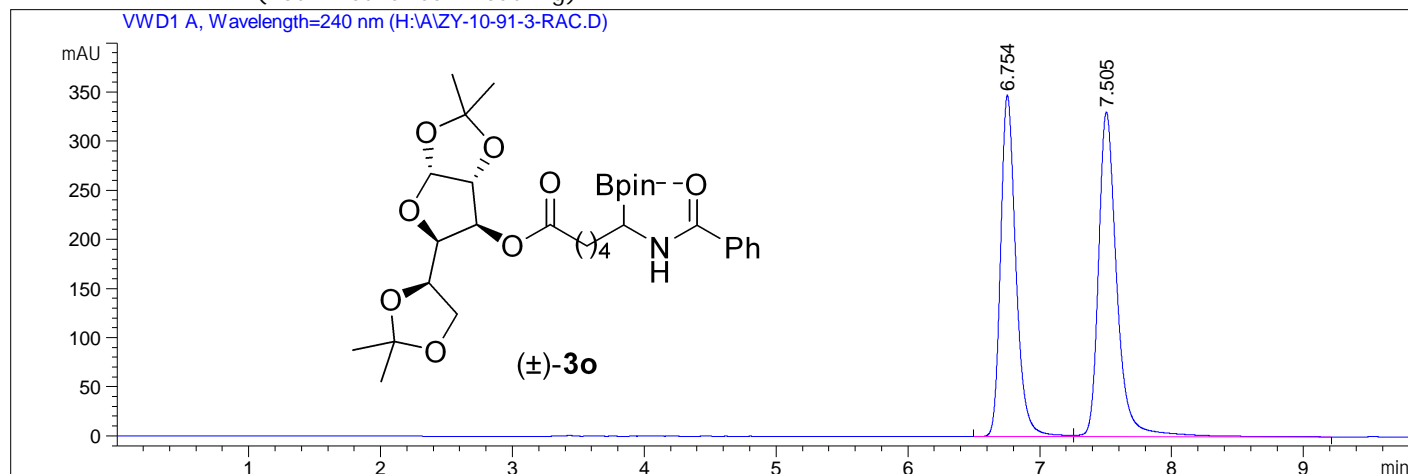

```

=====
Area Percent Report
=====

```

```

Sorted By      :      Signal
Multiplier     :      1.0000
Dilution       :      1.0000
Do not use Multiplier & Dilution Factor with ISTDs

```

Signal 1: VWD1 A, Wavelength=240 nm

| Peak # | RetTime [min] | Type | Width [min] | Area [mAU*s] | Height [mAU] | Area %  |
|--------|---------------|------|-------------|--------------|--------------|---------|
| 1      | 6.754         | BV   | 0.1230      | 2800.11133   | 347.39279    | 46.7353 |
| 2      | 7.505         | VB   | 0.1456      | 3191.31055   | 330.62488    | 53.2647 |

```
Totals :                5991.42188  678.01767
```

```

=====
*** End of Report ***
=====

```

**Supplementary Figure 219: HPLC spectrum of (±)-3o.**

Sample Name: ZY-10-91-2-EE

```

=====
Acq. Operator   : 系统                      Seq. Line :    3
Acq. Instrument : HPLC-1260                 Location  :   82
Injection Date  : 6/26/2022 2:29:40 PM      Inj       :    1
                                           Inj Volume: 3.000 µl
Different Inj Volume from Sample Entry! Actual Inj Volume : 0.600 µl
Acq. Method    : D:\zy\20220624\YH 2022-06-26 14-05-25\12EtOH2O_10-1-2-240.M
Last changed   : 6/26/2022 2:05:25 PM by 系统
Analysis Method : E:\DATA\20220317\LC 2022-08-08 20-30-16\2I PA-50-0.8-3-210-JXL.M (Sequence
Method)
Last changed   : 8/9/2022 9:03:39 AM by SYSTEM
                (modified after loading)
Additional Info : Peak(s) manually integrated
  
```

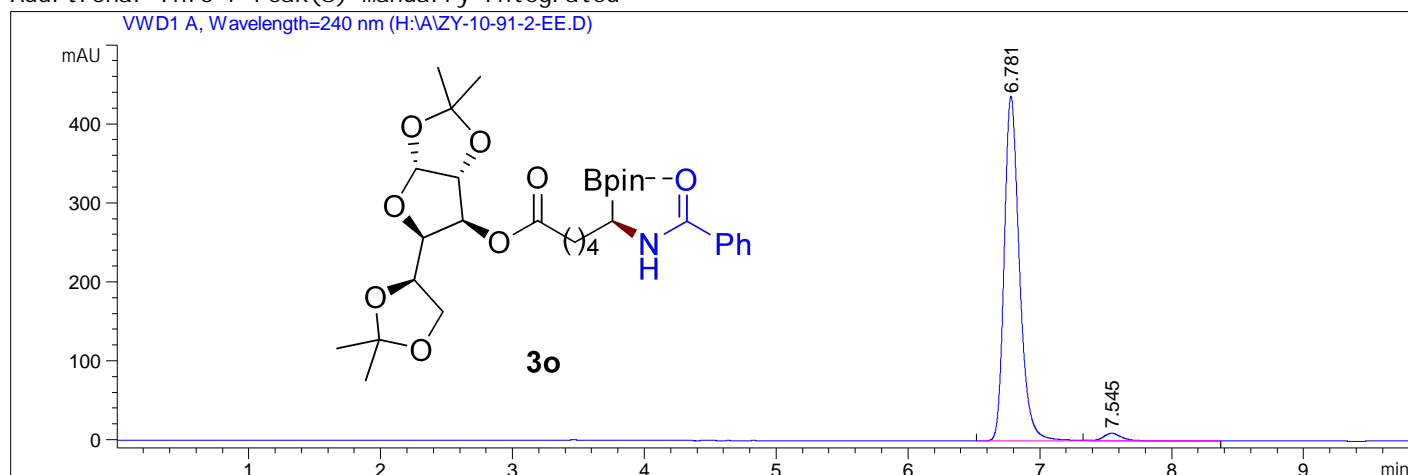

```

=====
Area Percent Report
=====
  
```

```

Sorted By      :      Signal
Multiplier     :      1.0000
Dilution       :      1.0000
Do not use Multiplier & Dilution Factor with ISTDs
  
```

Signal 1: VWD1 A, Wavelength=240 nm

| Peak # | RetTime [min] | Type | Width [min] | Area [mAU*s] | Height [mAU] | Area %  |
|--------|---------------|------|-------------|--------------|--------------|---------|
| 1      | 6.781         | BV R | 0.1229      | 3513.69751   | 436.44815    | 97.4507 |
| 2      | 7.545         | VB E | 0.1465      | 91.91974     | 9.48676      | 2.5493  |

```
Totals :                3605.61725  445.93491
```

```

=====
*** End of Report ***
  
```

**Supplementary Figure 220: HPLC spectrum of 3o.**

Sample Name: ZY-10-91-5-EE

```

=====
Acq. Operator   : 系统                      Seq. Line :    4
Acq. Instrument : HPLC-1260                 Location  :   83
Injection Date  : 6/26/2022 2:51:11 PM      Inj       :    1
                                           Inj Volume: 3.000 µl
Different Inj Volume from Sample Entry! Actual Inj Volume : 0.600 µl
Acq. Method     : D:\zy\20220624\YH 2022-06-26 14-05-25\12EtOH2O_10-1-2-240.M
Last changed    : 6/26/2022 2:05:25 PM by 系统
Analysis Method : E:\DATA\20220317\LC 2022-08-08 20-30-16\2I PA-50-0.8-3-210-JXL.M (Sequence
Method)
Last changed    : 8/9/2022 9:04:32 AM by SYSTEM
                 (modified after loading)
Additional Info : Peak(s) manually integrated
  
```

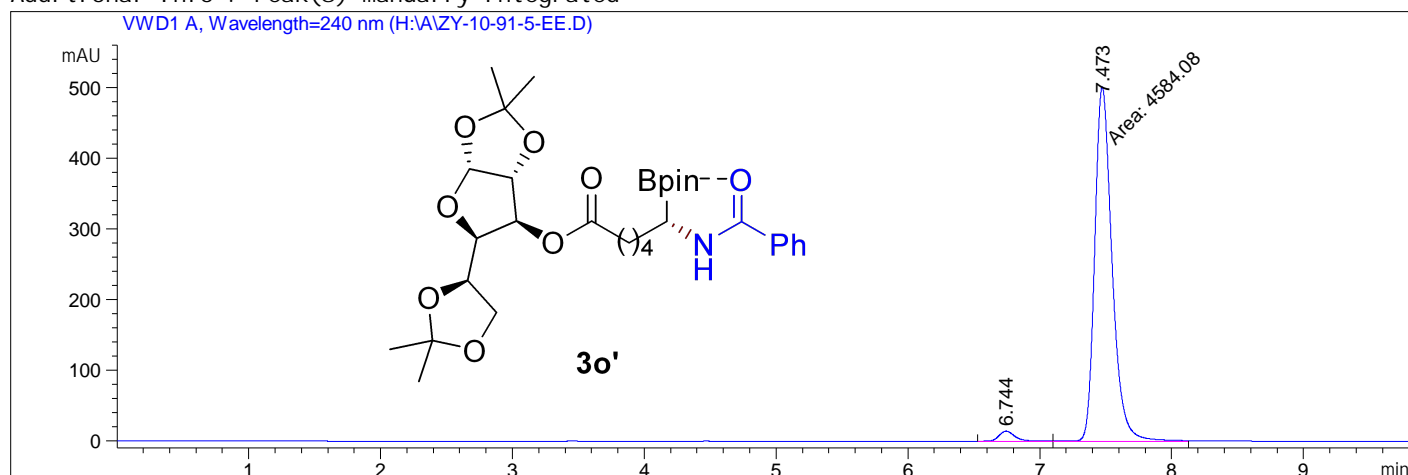

```

=====
Area Percent Report
=====
  
```

```

Sorted By      :      Signal
Multiplier     :      1.0000
Dilution       :      1.0000
Do not use Multiplier & Dilution Factor with ISTDs
  
```

Signal 1: VWD1 A, Wavelength=240 nm

| Peak # | RetTime [min] | Type | Width [min] | Area [mAU*s] | Height [mAU] | Area %  |
|--------|---------------|------|-------------|--------------|--------------|---------|
| 1      | 6.744         | BV   | 0.1267      | 118.68422    | 14.24024     | 2.5237  |
| 2      | 7.473         | MF   | 0.1523      | 4584.07568   | 501.71143    | 97.4763 |

```
Totals :                      4702.75990  515.95166
```

```

=====
*** End of Report ***
  
```

**Supplementary Figure 221: HPLC spectrum of 30'.**

Sample Name: ZY-10-101-3-RAC

```

=====
Acq. Operator   : 系统                      Seq. Line :   33
Acq. Instrument : HPLC-1260                 Location  :   61
Injection Date  : 7/5/2022 1:25:35 AM      Inj       :    1
                                           Inj Volume: 3.000 µl
Different Inj Volume from Sample Entry! Actual Inj Volume : 0.600 µl
Acq. Method     : D:\zy\20220624\YH 2022-07-04 14-04-41\10EtOH15_10-1-6-240.M
Last changed    : 7/4/2022 7:42:02 PM by 系统
Analysis Method : E:\DATA\20220317\LC 2022-08-08 20-30-16\2I PA-50-0.8-3-210-JXL.M (Sequence
                                           Method)
Last changed    : 8/9/2022 9:10:28 AM by SYSTEM
                                           (modified after loading)
=====

```

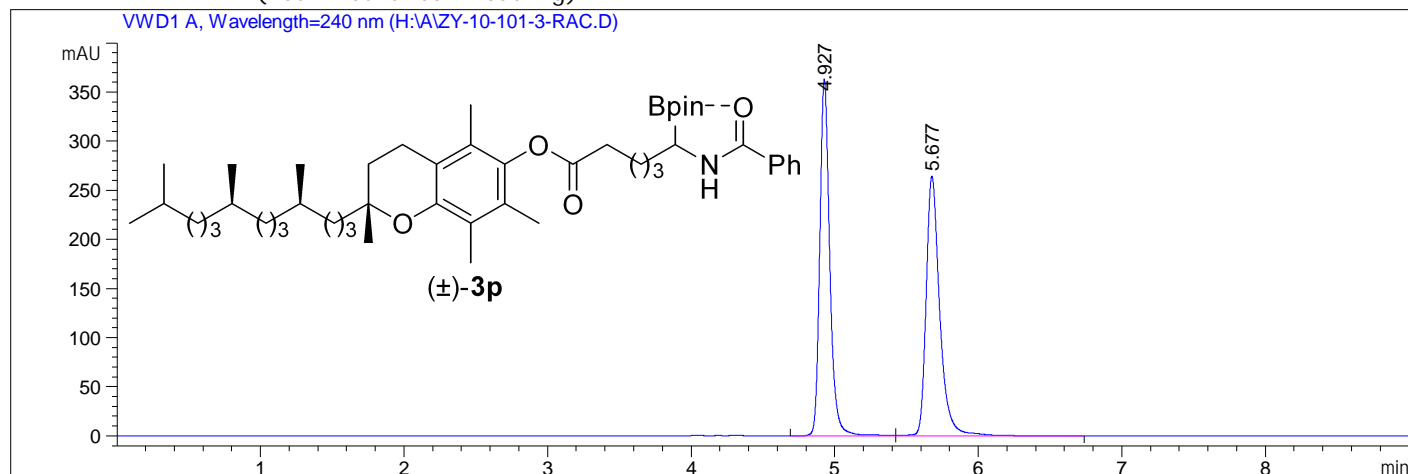

```

=====
Area Percent Report
=====

```

```

Sorted By      :      Signal
Multiplier     :      1.0000
Dilution       :      1.0000
Do not use Multiplier & Dilution Factor with ISTDs

```

Signal 1: VWD1 A, Wavelength=240 nm

| Peak # | RetTime [min] | Type | Width [min] | Area [mAU*s] | Height [mAU] | Area %  |
|--------|---------------|------|-------------|--------------|--------------|---------|
| 1      | 4.927         | BV R | 0.0736      | 1760.48340   | 363.18640    | 50.2205 |
| 2      | 5.677         | VB   | 0.0991      | 1745.02710   | 264.16177    | 49.7795 |

```
Totals :                3505.51050  627.34818
```

```

=====
*** End of Report ***
=====

```

**Supplementary Figure 222: HPLC spectrum of (±)-3p.**



Sample Name: ZY-10-101-6-EE

```

=====
Acq. Operator   : 系统                      Seq. Line :   32
Acq. Instrument : HPLC-1260                 Location  :   63
Injection Date  : 7/5/2022 1:09:09 AM       Inj       :    1
                                           Inj Volume: 3.000 µl
Different Inj Volume from Sample Entry! Actual Inj Volume : 0.300 µl
Acq. Method    : D:\zy\20220624\YH 2022-07-04 14-04-41\10EtOH15_10-1-6-240.M
Last changed   : 7/4/2022 7:42:02 PM by 系统
Analysis Method : E:\DATA\20220317\LC 2022-08-08 20-30-16\2I PA-50-0.8-3-210-JXL.M (Sequence
                                           Method)
Last changed   : 8/9/2022 9:09:12 AM by SYSTEM
                                           (modified after loading)
Additional Info : Peak(s) manually integrated
  
```

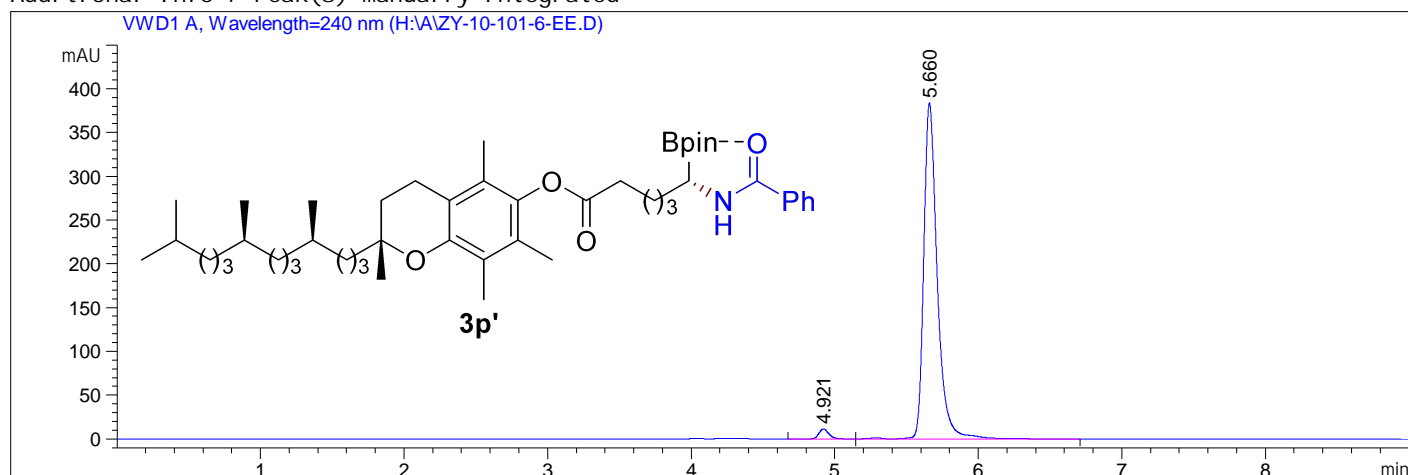

```

=====
                          Area Percent Report
=====
  
```

```

Sorted By      :      Signal
Multiplier     :      1.0000
Dilution      :      1.0000
Do not use Multiplier & Dilution Factor with ISTDs
  
```

Signal 1: VWD1 A, Wavelength=240 nm

| Peak # | RetTime [min] | Type | Width [min] | Area [mAU*s] | Height [mAU] | Area %  |
|--------|---------------|------|-------------|--------------|--------------|---------|
| 1      | 4.921         | BB   | 0.0754      | 58.30293     | 11.65547     | 2.2584  |
| 2      | 5.660         | VB R | 0.0991      | 2523.31274   | 384.16348    | 97.7416 |

```
Totals :                      2581.61567  395.81895
```

```

=====
*** End of Report ***
  
```

**Supplementary Figure 224: HPLC spectrum of 3p'.**



Sample Name: ZY-09-161-3-RAC

```

=====
Acq. Operator   : 系统                      Seq. Line :    4
Acq. Instrument : HPLC-1260                 Location  :   71
Injection Date  : 11/23/2021 9:59:34 AM    Inj       :    1
                                           Inj Volume: 3.000 µl
Different Inj Volume from Sample Entry! Actual Inj Volume : 0.400 µl
Acq. Method     : D:\zy\20211119\YH 2021-11-23 09-08-50\5Et0H15_10-1-2-254.M
Last changed    : 11/23/2021 10:14:40 AM by 系统
                                           (modified after loading)
Analysis Method : E:\DATA\20220316\LC 2022-03-16 22-19-08\10IPA-10-1.0-1.MZWJ.M (Sequence
                                           Method)
Last changed    : 3/28/2022 11:08:25 PM by SYSTEM
                                           (modified after loading)
Additional Info  : Peak(s) manually integrated
=====

```

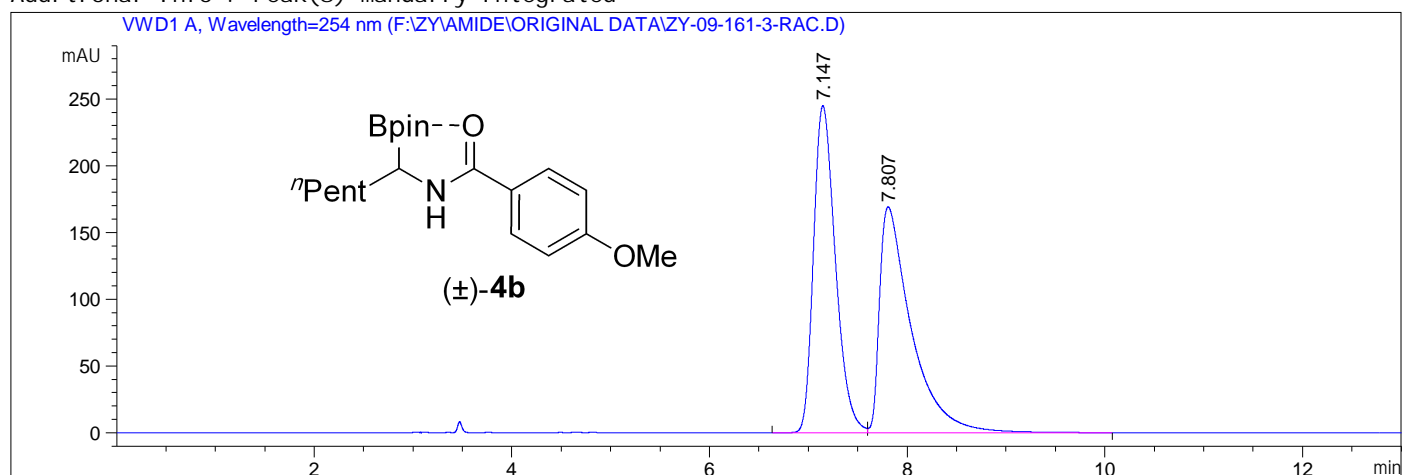

```

=====
                          Area Percent Report
=====

```

```

Sorted By      :      Signal
Multiplier     :      1.0000
Dilution      :      1.0000
Do not use Multiplier & Dilution Factor with ISTDs

```

Signal 1: VWD1 A, Wavelength=254 nm

| Peak # | RetTime [min] | Type | Width [min] | Area [mAU*s] | Height [mAU] | Area %  |
|--------|---------------|------|-------------|--------------|--------------|---------|
| 1      | 7.147         | BV   | 0.2367      | 3775.47705   | 245.07373    | 50.0009 |
| 2      | 7.807         | VB   | 0.3262      | 3775.33398   | 169.27411    | 49.9991 |

```
Totals :                      7550.81104  414.34784
```

```

=====
*** End of Report ***
=====

```

**Supplementary Figure 225: HPLC spectrum of (±)-4b.**

Sample Name: ZY-09-161-3-EE

```

=====
Acq. Operator   : 系统                               Seq. Line :    5
Acq. Instrument : HPLC-1260                           Location  :   72
Injection Date  : 11/23/2021 10:16:12 AM              Inj       :    1
                                                    Inj Volume: 3.000 µl
Different Inj Volume from Sample Entry! Actual Inj Volume : 0.300 µl
Acq. Method    : D:\zy\20211119\YH 2021-11-23 09-08-50\5EtOH15_10-1-2-254.M
Last changed   : 11/23/2021 10:14:40 AM by 系统
Analysis Method : E:\DATA\20220316\LC 2022-03-16 22-19-08\10IPA-10-1.0-1.MZWJ.M (Sequence
                Method)
Last changed   : 3/28/2022 11:07:48 PM by SYSTEM
                (modified after Loading)
    
```

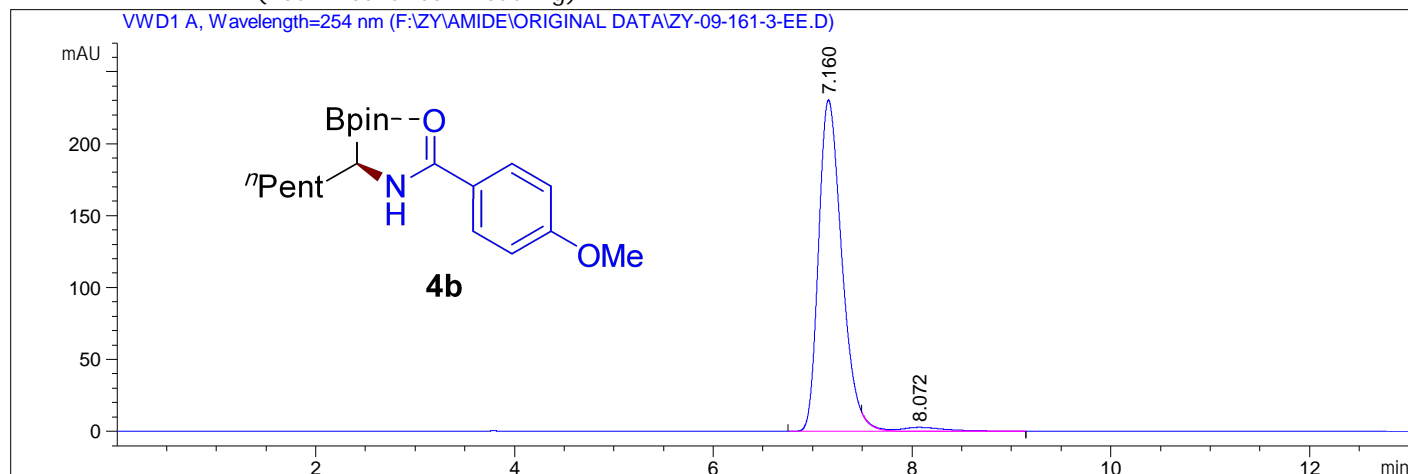

Area Percent Report

```

Sorted By      : Signal
Multiplier     : 1.0000
Dilution       : 1.0000
Do not use Multiplier & Dilution Factor with ISTDs
    
```

Signal 1: VWD1 A, Wavelength=254 nm

| Peak # | RetTime [min] | Type | Width [min] | Area [mAU*s] | Height [mAU] | Area %  |
|--------|---------------|------|-------------|--------------|--------------|---------|
| 1      | 7.160         | BV R | 0.2495      | 3752.35693   | 230.38501    | 97.6166 |
| 2      | 8.072         | VB E | 0.4021      | 91.61741     | 2.72957      | 2.3834  |

Totals : 3843.97434 233.11458

\*\*\* End of Report \*\*\*

Supplementary Figure 226: HPLC spectrum of 4b.

Sample Name: ZY-09-189-2-RAC

```

=====
Acq. Operator   : 系统                      Seq. Line : 22
Acq. Instrument : HPLC-1260                 Location  : 77
Injection Date  : 8/20/2022 2:05:52 PM      Inj       : 1
                                           Inj Volume: 3.000 µl
Different Inj Volume from Sample Entry! Actual Inj Volume : 1.000 µl
Acq. Method    : D:\zy\20220803\YH 2022-08-20 08-41-06\5EtOH15_10-1-6-220.M
Last changed   : 8/20/2022 2:00:54 PM by 系统
Analysis Method: C:\Chem32\1\Data\LC 2020-08-14 14-31-12\test2.M (Sequence Method)
Last changed   : 8/23/2022 3:25:25 PM by SYSTEM
                (modified after loading)
Additional Info: Peak(s) manually integrated
  
```

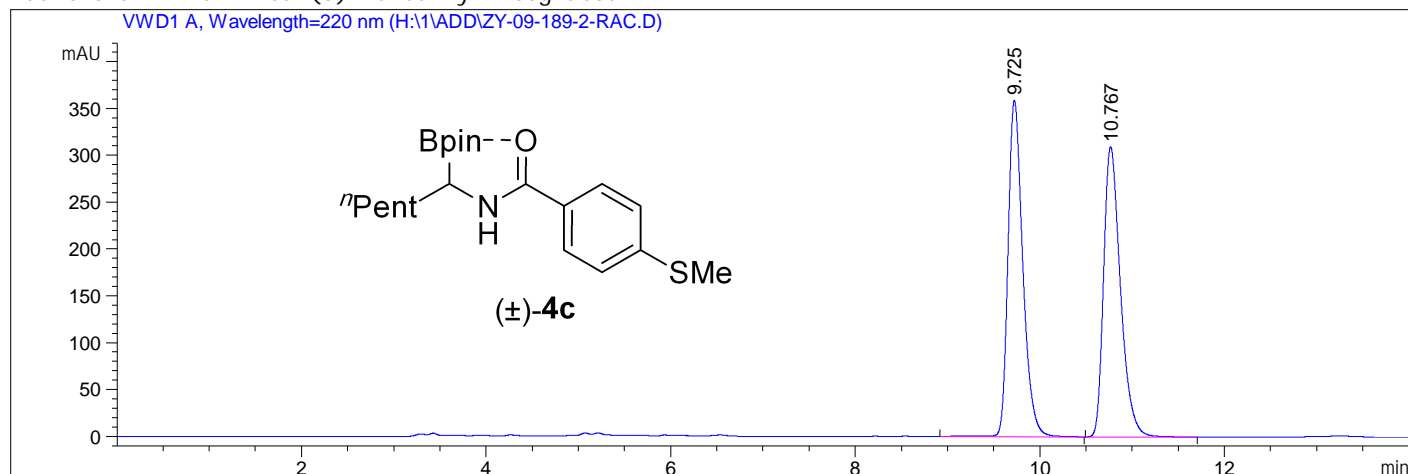

```

=====
Area Percent Report
=====
  
```

```

Sorted By      : Signal
Multiplier     : 1.0000
Dilution       : 1.0000
Do not use Multiplier & Dilution Factor with ISTDs
  
```

Signal 1: VWD1 A, Wavelength=220 nm

| Peak # | RetTime [min] | Type | Width [min] | Area [mAU*s] | Height [mAU] | Area %  |
|--------|---------------|------|-------------|--------------|--------------|---------|
| 1      | 9.725         | VB R | 0.1710      | 4004.30542   | 359.31268    | 50.4995 |
| 2      | 10.767        | BB   | 0.1953      | 3925.08423   | 309.83737    | 49.5005 |

```
Totals :                7929.38965  669.15005
```

```

=====
*** End of Report ***
  
```

**Supplementary Figure 227: HPLC spectrum of (±)-4c.**

Sample Name: ZY-09-189-2-EE

```

=====
Acq. Operator   : 系统                      Seq. Line :   19
Acq. Instrument : HPLC-1260                 Location  :    79
Injection Date  : 8/20/2022 1:19:09 PM      Inj       :    1
                                           Inj Volume: 3.000 µl
Different Inj Volume from Sample Entry! Actual Inj Volume : 0.600 µl
Acq. Method     : D:\zy\20220803\YH 2022-08-20 08-41-06\5EtOH15_10-1-6-220.M
Last changed    : 8/20/2022 9:59:08 AM by 系统
Analysis Method : E:\DATA\20220317\LC 2022-08-22 08-37-45\5IPA-40-1.0-1-220-ODY.M (Sequence
Method)
Last changed    : 8/22/2022 7:04:29 PM by SYSTEM
                 (modified after loading)
Additional Info : Peak(s) manually integrated

```

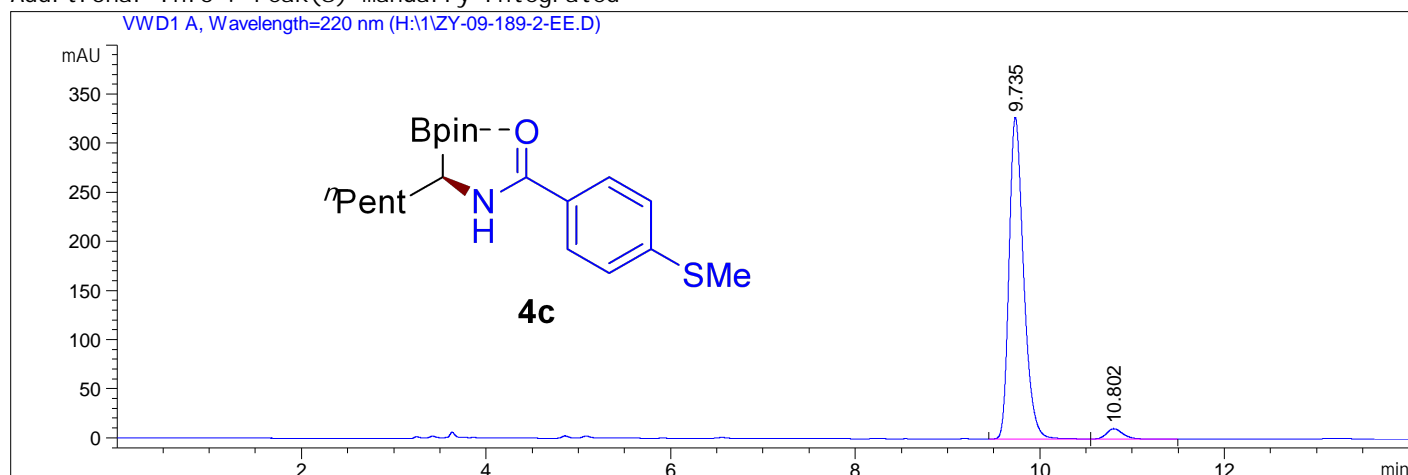

```

=====
Area Percent Report
=====

```

```

Sorted By      :      Signal
Multiplier     :      1.0000
Dilution       :      1.0000
Do not use Multiplier & Dilution Factor with ISTDs

```

Signal 1: VWD1 A, Wavelength=220 nm

| Peak # | RetTime [min] | Type | Width [min] | Area [mAU*s] | Height [mAU] | Area %  |
|--------|---------------|------|-------------|--------------|--------------|---------|
| 1      | 9.735         | BV   | 0.1678      | 3588.63062   | 327.61975    | 96.4551 |
| 2      | 10.802        | VB   | 0.1891      | 131.88794    | 10.52918     | 3.5449  |

```
Totals :                3720.51855  338.14893
```

```

=====
*** End of Report ***
=====

```

**Supplementary Figure 228: HPLC spectrum of 4c.**

```

=====
Acq. Operator   : 系统                      Seq. Line :   31
Acq. Instrument : HPLC-1260                 Location  :   44
Injection Date  : 12/21/2021 10:14:13 PM    Inj       :    1
                                           Inj Volume: 3.000 µl
Different Inj Volume from Sample Entry! Actual Inj Volume : 0.300 µl
Acq. Method     : D:\zy\20211219\YH 2021-12-21 13-59-57\5EtOH20_10-1-2-220.M
Last changed    : 12/21/2021 9:45:37 PM by 系统
Analysis Method : E:\DATA\20220317\LC 2022-03-29 18-02-36\1.01PA_15_0.8_1-254-SFT.M (Sequence
Method)
Last changed    : 3/29/2022 8:47:13 PM by SYSTEM
                (modified after loading)
Additional Info : Peak(s) manually integrated
  
```

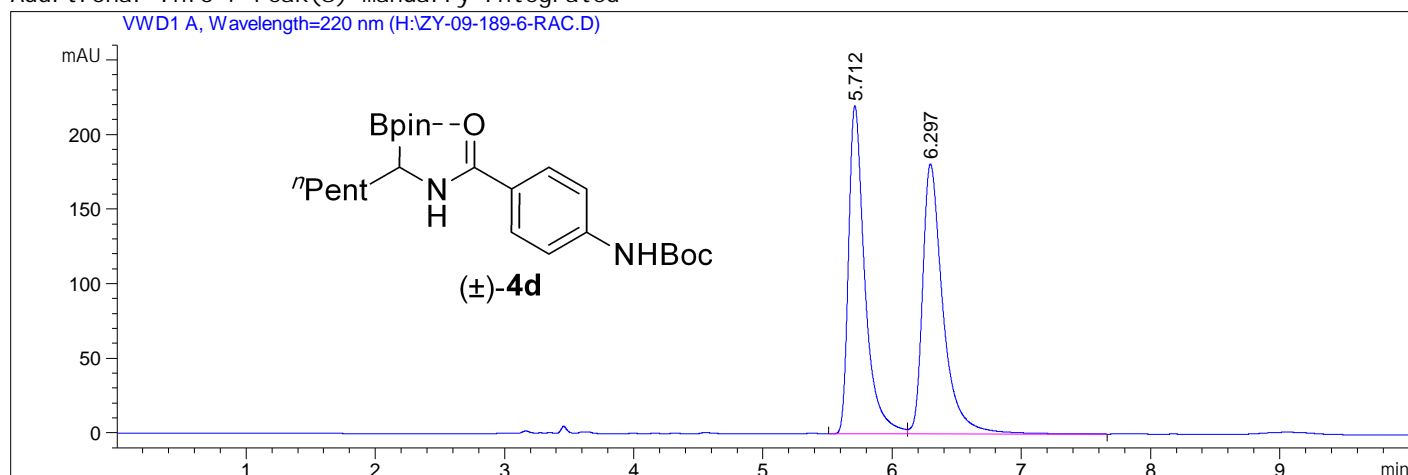

```

=====
Area Percent Report
=====
  
```

```

Sorted By      :      Signal
Multiplier     :      1.0000
Dilution       :      1.0000
Do not use Multiplier & Dilution Factor with ISTDs
  
```

Signal 1: VWD1 A, Wavelength=220 nm

| Peak # | RetTime [min] | Type | Width [min] | Area [mAU*s] | Height [mAU] | Area %  |
|--------|---------------|------|-------------|--------------|--------------|---------|
| 1      | 5.712         | BV   | 0.1316      | 1935.34534   | 220.14615    | 49.1952 |
| 2      | 6.297         | VB   | 0.1642      | 1998.66370   | 181.10876    | 50.8048 |

```
Totals :                      3934.00903  401.25491
```

```

=====
*** End of Report ***
  
```

**Supplementary Figure 229: HPLC spectrum of (±)-4d.**



Sample Name: ZY-10-69-6-RAC

```

=====
Acq. Operator   : 系统                      Seq. Line :    3
Acq. Instrument : HPLC-1260                  Location  :   41
Injection Date  : 5/29/2022 8:39:19 PM      Inj       :    1
                                           Inj Volume: 3.000 µl
Different Inj Volume from Sample Entry! Actual Inj Volume : 0.500 µl
Acq. Method     : D:\zy\20220328\YH 2022-05-29 20-09-39\5EtOH15_10-1-2-240.M
Last changed    : 5/29/2022 8:09:40 PM by 系统
Analysis Method : E:\DATA\20220317\LC 2022-06-04 08-49-06\0.3IPA-0.3-60-220-1-CCP.M (Sequence
Method)
Last changed    : 6/7/2022 10:14:44 AM by SYSTEM
(modified after loading)
Additional Info : Peak(s) manually integrated
  
```

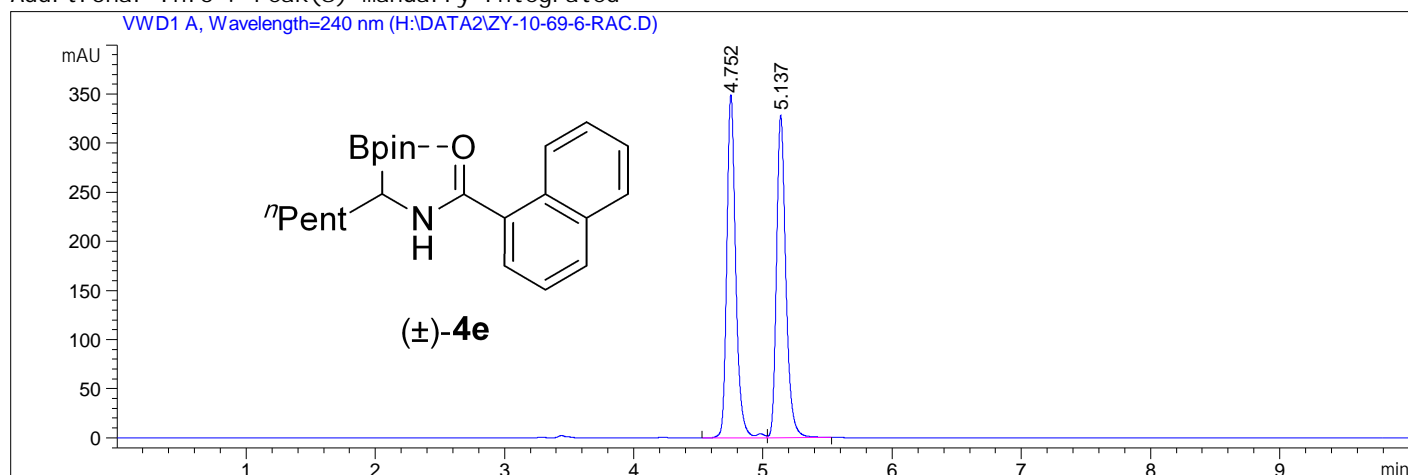

```

=====
                          Area Percent Report
=====
  
```

```

Sorted By      :      Signal
Multiplier     :      1.0000
Dilution       :      1.0000
Do not use Multiplier & Dilution Factor with ISTDs
  
```

Signal 1: VWD1 A, Wavelength=240 nm

| Peak # | RetTime [min] | Type | Width [min] | Area [mAU*s] | Height [mAU] | Area %  |
|--------|---------------|------|-------------|--------------|--------------|---------|
| 1      | 4.752         | BV R | 0.0720      | 1679.71350   | 349.52957    | 50.4898 |
| 2      | 5.137         | VB   | 0.0766      | 1647.12341   | 328.13077    | 49.5102 |

```
Totals :                      3326.83691  677.66034
```

```

=====
*** End of Report ***
  
```

**Supplementary Figure 231: HPLC spectrum of (±)-4e.**

Sample Name: ZY-10-69-6-EE

```

=====
Acq. Operator   : 系统                      Seq. Line   :    4
Acq. Instrument : HPLC-1260                 Location    :   42
Injection Date  : 5/29/2022 8:55:45 PM    Inj         :    1
                                           Inj Volume  : 3.000 µl
Different Inj Volume from Sample Entry! Actual Inj Volume : 0.100 µl
Acq. Method    : D:\zy\20220328\YH 2022-05-29 20-09-39\5EtOH15_10-1-2-240.M
Last changed   : 5/29/2022 8:09:40 PM by 系统
Analysis Method : E:\DATA\20220317\LC 2022-06-04 08-49-06\0.3IPA-0.3-60-220-1-CCP.M (Sequence
                                           Method)
Last changed   : 6/7/2022 10:13:51 AM by SYSTEM
                                           (modified after loading)
=====

```

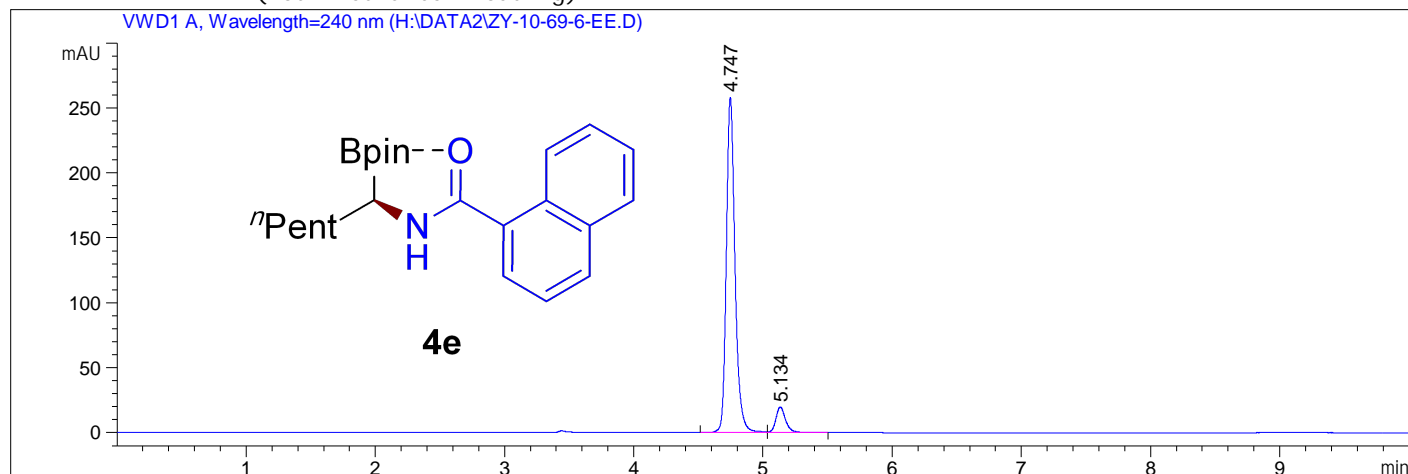

```

=====
Area Percent Report
=====

```

```

Sorted By      :      Signal
Multiplier     :      1.0000
Dilution       :      1.0000
Do not use Multiplier & Dilution Factor with ISTDs

```

Signal 1: VWD1 A, Wavelength=240 nm

| Peak # | RetTime [min] | Type | Width [min] | Area [mAU*s] | Height [mAU] | Area %  |
|--------|---------------|------|-------------|--------------|--------------|---------|
| 1      | 4.747         | BV   | 0.0710      | 1203.43774   | 257.80865    | 92.1441 |
| 2      | 5.134         | VB   | 0.0789      | 102.60114    | 19.82286     | 7.8559  |

```

Totals :                      1306.03889  277.63151

```

```

=====
*** End of Report ***
=====

```

**Supplementary Figure 232: HPLC spectrum of 4e.**



Sample Name: ZY-09-164-5-RAC

```

=====
Acq. Operator   : SYSTEM                               Seq. Line :   53
Acq. Instrument : HPLC1260                           Location  : P1-E4
Injection Date  : 12/1/2021 9:28:54 AM                Inj       :    1
                                                    Inj Volume: 3.000 µl
Different Inj Volume from Sample Entry! Actual Inj Volume : 0.300 µl
Acq. Method    : E:\DATA\20210920\LC 2021-11-30 09-32-52\3IPA_20_0.4_3-254.M
Last changed   : 12/1/2021 9:25:40 AM by SYSTEM
Analysis Method: E:\DATA\20210920\LC 2021-11-30 09-32-52\3IPA_20_0.4_3-254.M (Sequence
                Method)
Last changed   : 12/1/2021 12:28:00 PM by SYSTEM
                (modified after loading)
Additional Info: Peak(s) manually integrated
    
```

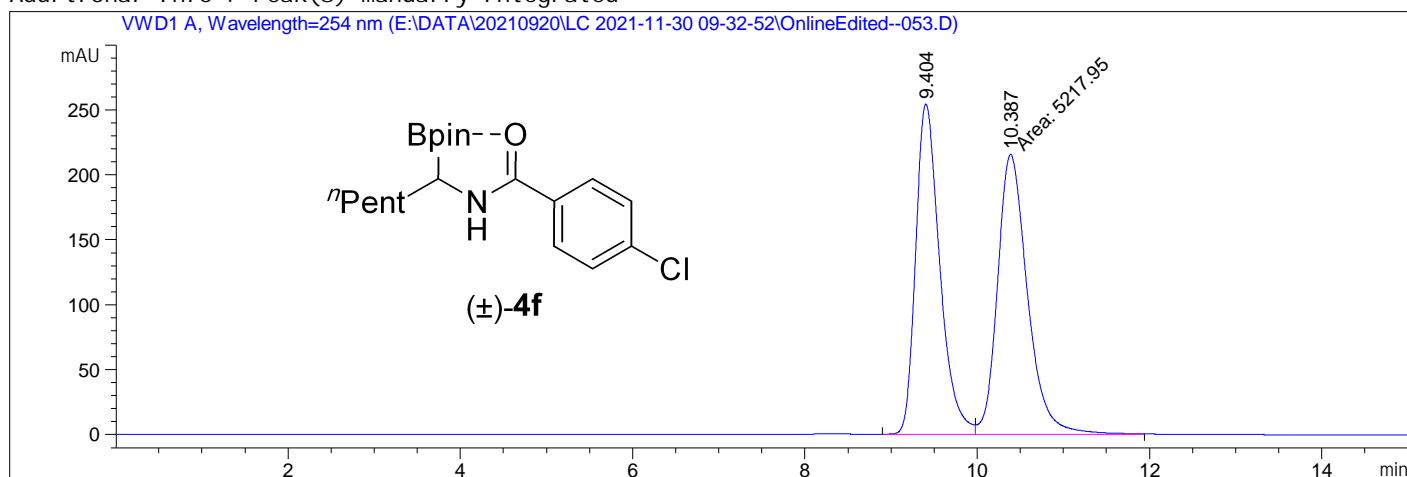

Area Percent Report

```

Sorted By      : Signal
Multiplier     : 1.0000
Dilution       : 1.0000
Do not use Multiplier & Dilution Factor with ISTDs
    
```

Signal 1: VWD1 A, Wavelength=254 nm

| Peak # | RetTime [min] | Type | Width [min] | Area [mAU*s] | Height [mAU] | Area %  |
|--------|---------------|------|-------------|--------------|--------------|---------|
| 1      | 9.404         | BV   | 0.2968      | 4941.78369   | 254.15439    | 48.6409 |
| 2      | 10.387        | MF   | 0.4034      | 5217.95313   | 215.57483    | 51.3591 |

Totals : 1.01597e4 469.72922

\*\*\* End of Report \*\*\*

**Supplementary Figure 233: HPLC spectrum of (±)-4f.**

Sample Name: ZY-09-164-5-EE

```

=====
Acq. Operator   : SYSTEM                      Seq. Line :   51
Acq. Instrument : HPLC1260                   Location  : P1-E3
Injection Date  : 12/1/2021 8:47:09 AM       Inj       :    1
                                           Inj Volume: 3.000 µl
Different Inj Volume from Sample Entry! Actual Inj Volume : 0.500 µl
Acq. Method    : E:\DATA\20210920\LC 2021-11-30 09-32-52\3IPA_20_0.4_3-254.M
Last changed   : 11/30/2021 11:50:22 PM by SYSTEM
Analysis Method: E:\DATA\20210920\LC 2021-11-30 09-32-52\3IPA_20_0.4_3-254.M (Sequence
Method)
Last changed   : 12/1/2021 12:28:54 PM by SYSTEM
                (modified after loading)
=====
    
```

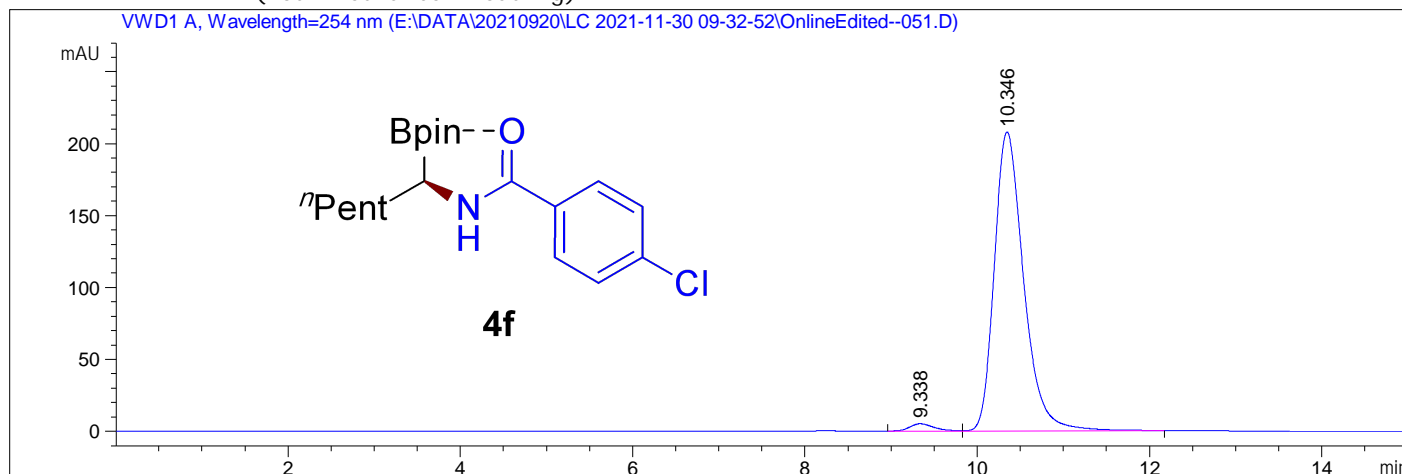

=====  
 Area Percent Report  
 =====

```

Sorted By      :      Signal
Multiplier     :      1.0000
Dilution       :      1.0000
Do not use Multiplier & Dilution Factor with ISTDs
    
```

Signal 1: VWD1 A, Wavelength=254 nm

| Peak # | RetTime [min] | Type | Width [min] | Area [mAU*s] | Height [mAU] | Area %  |
|--------|---------------|------|-------------|--------------|--------------|---------|
| 1      | 9.338         | BV   | 0.2937      | 96.96291     | 5.03491      | 1.9338  |
| 2      | 10.346        | VB   | 0.3610      | 4917.21289   | 207.83859    | 98.0662 |

Totals :                      5014.17580   212.87350

=====  
 \*\*\* End of Report \*\*\*

**Supplementary Figure 234: HPLC spectrum of 4f.**

Sample Name: ZY-09-161-8-RAC

```

=====
Acq. Operator   : 系统                      Seq. Line :    7
Acq. Instrument : HPLC-1260                 Location  :   21
Injection Date  : 11/24/2021 12:11:30 AM    Inj       :    1
                                           Inj Volume: 3.000 µl
Different Inj Volume from Sample Entry! Actual Inj Volume : 1.500 µl
Acq. Method     : D:\zy\20211119\YH 2021-11-23 21-47-26\3IPA-30-0.8-1-2-254.M
Last changed    : 11/23/2021 9:47:27 PM by 系统
Analysis Method : E:\DATA\20220316\LC 2022-03-16 22-19-08\10IPA-10-1.0-1.MZWJ.M (Sequence
Method)
Last changed    : 3/28/2022 11:10:10 PM by SYSTEM
                (modified after loading)
Additional Info : Peak(s) manually integrated
  
```

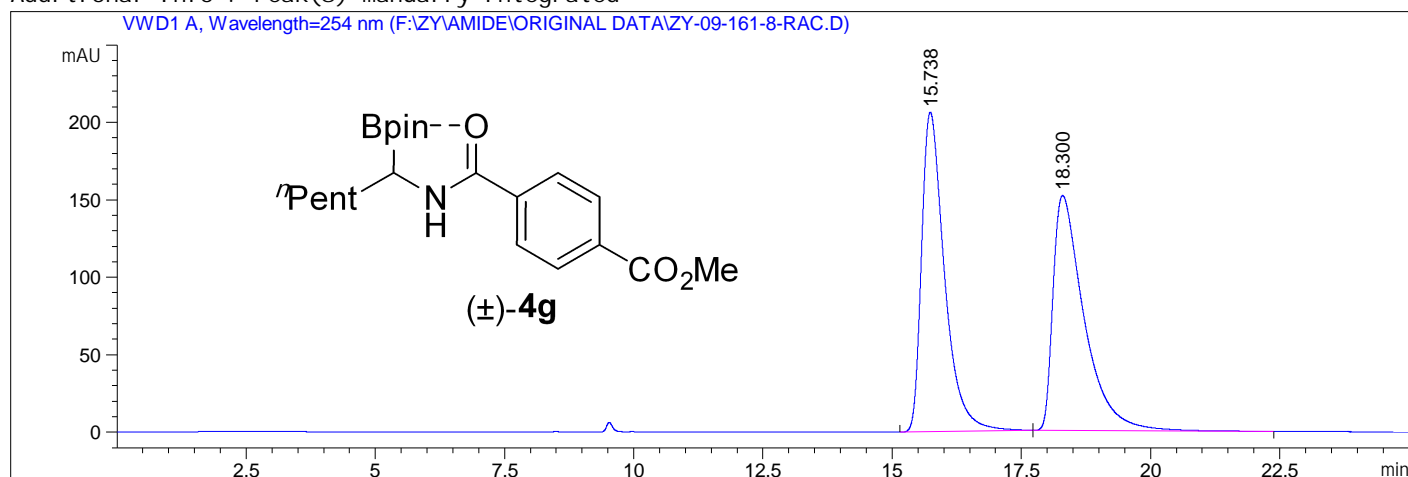

```

=====
Area Percent Report
=====
  
```

```

Sorted By      :      Signal
Multiplier     :      1.0000
Dilution       :      1.0000
Do not use Multiplier & Dilution Factor with ISTDs
  
```

Signal 1: VWD1 A, Wavelength=254 nm

| Peak # | RetTime [min] | Type | Width [min] | Area [mAU*s] | Height [mAU] | Area %  |
|--------|---------------|------|-------------|--------------|--------------|---------|
| 1      | 15.738        | BB   | 0.4680      | 6377.62256   | 206.38446    | 50.1471 |
| 2      | 18.300        | BB   | 0.6098      | 6340.20410   | 151.79956    | 49.8529 |

```
Totals :                1.27178e4    358.18402
```

```

=====
*** End of Report ***
  
```

**Supplementary Figure 235: HPLC spectrum of (±)-4g.**

Sample Name: ZY-09-161-8-EE

```

=====
Acq. Operator   : 系统                      Seq. Line   :    6
Acq. Instrument : HPLC-1260                  Location    :   22
Injection Date  : 11/23/2021 11:40:07 PM Inj         :    1
                                           Inj Volume  : 3.000 µl
Different Inj Volume from Sample Entry! Actual Inj Volume : 0.700 µl
Acq. Method    : D:\zy\20211119\YH 2021-11-23 21-47-26\3IPA-30-0.8-1-2-254.M
Last changed   : 11/23/2021 9:47:27 PM by 系统
Analysis Method : E:\DATA\20220316\LC 2022-03-16 22-19-08\10IPA-10-1.0-1.MZWJ.M (Sequence
                                           Method)
Last changed   : 3/28/2022 11:09:37 PM by SYSTEM
                                           (modified after Loading)
=====
    
```

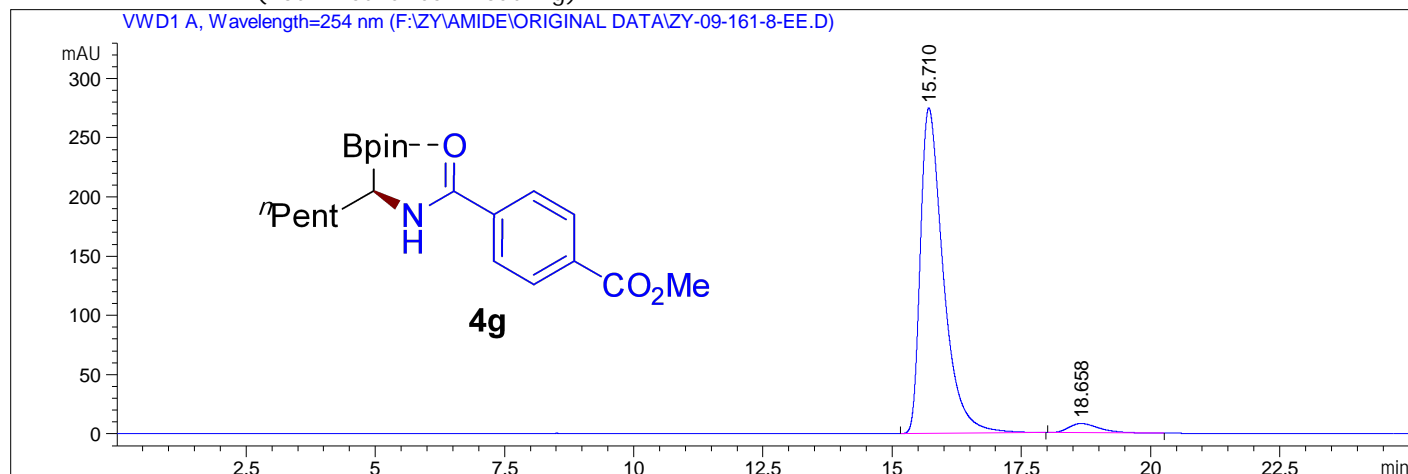

Area Percent Report

```

=====
Sorted By      :      Signal
Multiplier    :      1.0000
Dilution      :      1.0000
Do not use Multiplier & Dilution Factor with ISTDs
    
```

Signal 1: VWD1 A, Wavelength=254 nm

| Peak # | RetTime [min] | Type | Width [min] | Area [mAU*s] | Height [mAU] | Area %  |
|--------|---------------|------|-------------|--------------|--------------|---------|
| 1      | 15.710        | BB   | 0.4667      | 8486.95020   | 274.90009    | 96.3010 |
| 2      | 18.658        | BB   | 0.5090      | 325.99210    | 7.82603      | 3.6990  |

Totals : 8812.94229 282.72612

\*\*\* End of Report \*\*\*

Supplementary Figure 236: HPLC spectrum of 4g.

Sample Name: ZY-09-165-2-RAC

```

=====
Acq. Operator   : SYSTEM                               Seq. Line :   56
Acq. Instrument : HPLC1260                             Location  : P1-E2
Injection Date  : 12/1/2021 10:26:45 AM                Inj       :    1
                                                    Inj Volume: 3.000 µl
Different Inj Volume from Sample Entry! Actual Inj Volume : 1.600 µl
Acq. Method    : E:\DATA\20210920\LC 2021-11-30 09-32-52\2I PA_20_1.0_2-254.M
Last changed   : 12/1/2021 9:31:40 AM by SYSTEM
Analysis Method : E:\DATA\20210920\LC 2021-11-30 09-32-52\2I PA_20_1.0_2-254.M (Sequence
                Method)
Last changed   : 12/1/2021 12:30:19 PM by SYSTEM
                (modified after loading)
Additional Info : Peak(s) manually integrated
    
```

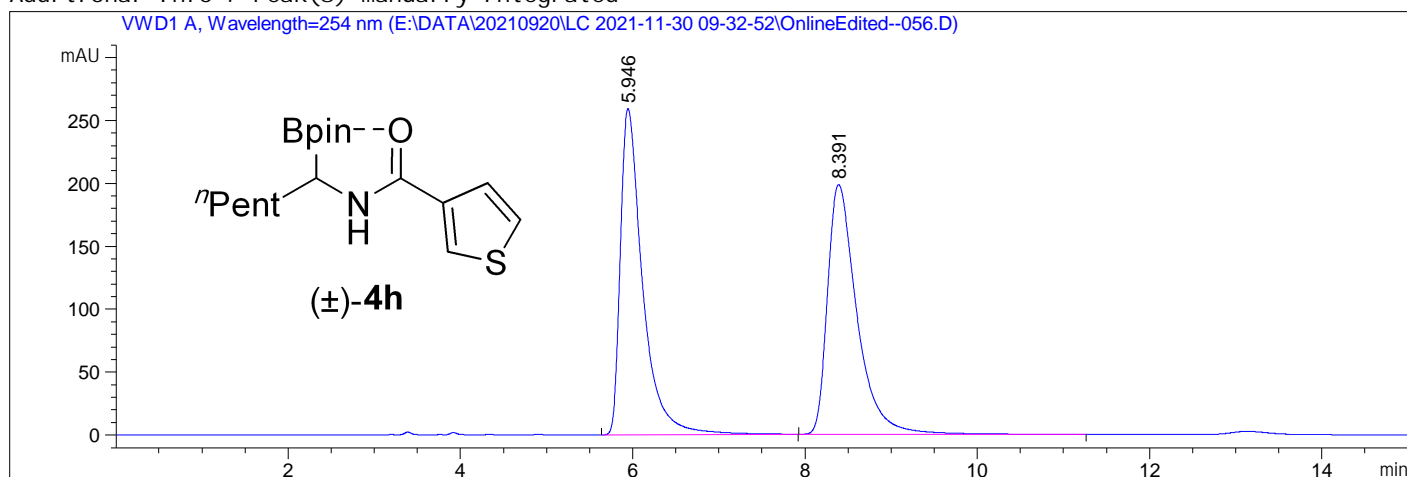

Area Percent Report

```

Sorted By      :      Signal
Multiplier     :      1.0000
Dilution       :      1.0000
Do not use Multiplier & Dilution Factor with ISTDs
    
```

Signal 1: VWD1 A, Wavelength=254 nm

| Peak # | RetTime [min] | Type | Width [min] | Area [mAU*s] | Height [mAU] | Area %  |
|--------|---------------|------|-------------|--------------|--------------|---------|
| 1      | 5.946         | BB   | 0.2665      | 4652.44141   | 259.13269    | 49.6479 |
| 2      | 8.391         | BB   | 0.3575      | 4718.43799   | 198.40140    | 50.3521 |

Totals : 9370.87939 457.53409

\*\*\* End of Report \*\*\*

**Supplementary Figure 237: HPLC spectrum of (±)-4h.**

Sample Name: ZY-09-165-2-EE

```

=====
Acq. Operator   : SYSTEM                      Seq. Line :   55
Acq. Instrument : HPLC1260                   Location  : P1-E1
Injection Date  : 12/1/2021 10:05:47 AM      Inj       :    1
                                           Inj Volume: 3.000 µl
Different Inj Volume from Sample Entry! Actual Inj Volume : 1.500 µl
Acq. Method    : E:\DATA\20210920\LC 2021-11-30 09-32-52\2I PA_20_1.0_2-254.M
Last changed   : 12/1/2021 9:31:40 AM by SYSTEM
Analysis Method : E:\DATA\20210920\LC 2021-11-30 09-32-52\2I PA_20_1.0_2-254.M (Sequence
                                           Method)
Last changed   : 12/1/2021 12:30:52 PM by SYSTEM
                                           (modified after loading)
=====
    
```

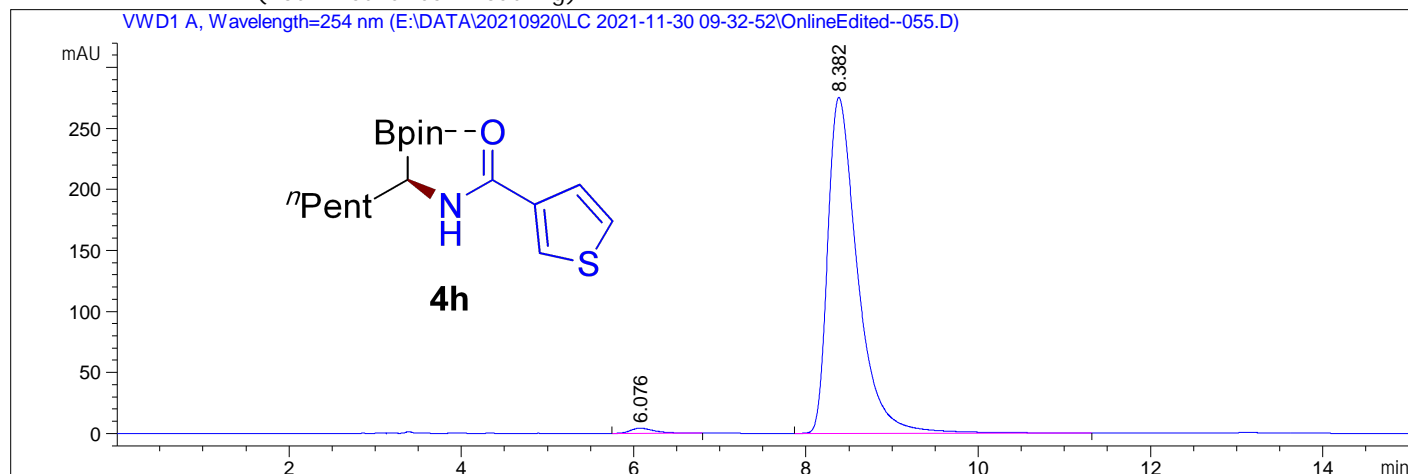

Area Percent Report

```

Sorted By      : Signal
Multiplier     : 1.0000
Dilution       : 1.0000
Do not use Multiplier & Dilution Factor with ISTDs
    
```

Signal 1: VWD1 A, Wavelength=254 nm

| Peak # | RetTime [min] | Type | Width [min] | Area [mAU*s] | Height [mAU] | Area %  |
|--------|---------------|------|-------------|--------------|--------------|---------|
| 1      | 6.076         | BB   | 0.2913      | 81.13868     | 4.18332      | 1.2148  |
| 2      | 8.382         | BB   | 0.3615      | 6597.98486   | 275.45410    | 98.7852 |

Totals : 6679.12354 279.63742

\*\*\* End of Report \*\*\*

**Supplementary Figure 238: HPLC spectrum of 4h.**

Sample Name: ZY-09-167-6-RAC

```

=====
Acq. Operator   : SYSTEM                      Seq. Line :    4
Acq. Instrument : HPLC1260                   Location  : P1-C2
Injection Date  : 12/22/2021 2:55:43 PM      Inj       :    1
                                           Inj Volume: 3.000 µl
Different Inj Volume from Sample Entry! Actual Inj Volume : 0.500 µl
Acq. Method     : E:\DATA\20211222\LC 2021-12-22 14-06-06\5I PA15_10_3-240.M
Last changed    : 12/22/2021 2:06:06 PM by SYSTEM
Analysis Method : E:\DATA\20211222\LC 2021-12-22 14-06-06\5I PA15_10_3-240.M (Sequence Method)
Last changed    : 12/22/2021 3:19:21 PM by SYSTEM
                 (modified after loading)
Additional Info : Peak(s) manually integrated
  
```

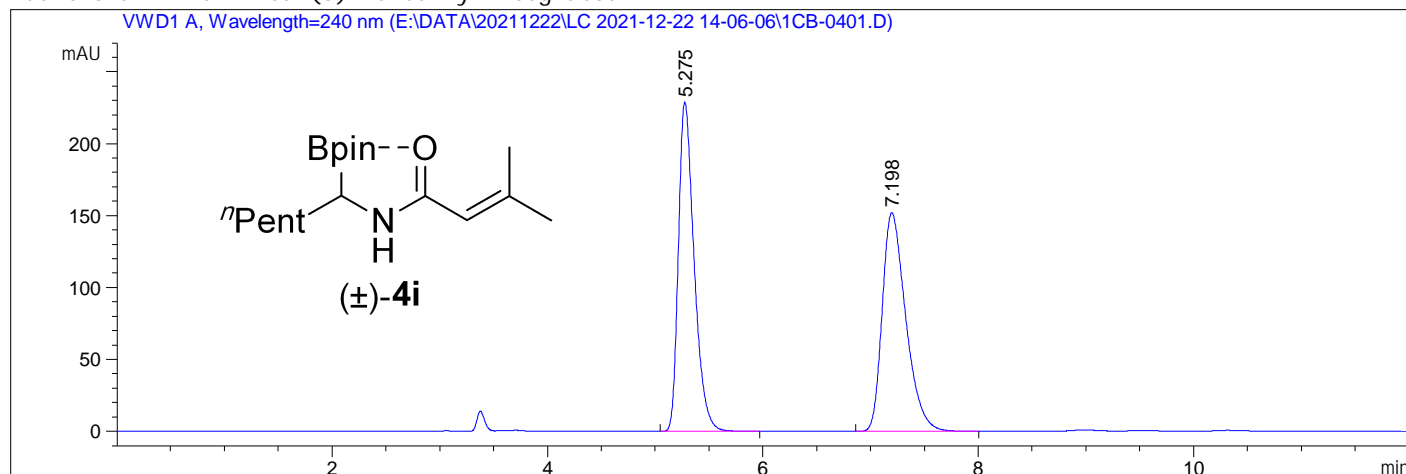

```

=====
                          Area Percent Report
=====
  
```

```

Sorted By      :      Signal
Multiplier     :      1.0000
Dilution      :      1.0000
Do not use Multiplier & Dilution Factor with ISTDs
  
```

Signal 1: VWD1 A, Wavelength=240 nm

| Peak # | RetTime [min] | Type | Width [min] | Area [mAU*s] | Height [mAU] | Area %  |
|--------|---------------|------|-------------|--------------|--------------|---------|
| 1      | 5.275         | BB   | 0.1542      | 2320.10425   | 228.95290    | 50.1665 |
| 2      | 7.198         | BB   | 0.2309      | 2304.70605   | 152.02585    | 49.8335 |

```
Totals :                      4624.81030  380.97874
```

```

=====
*** End of Report ***
  
```

**Supplementary Figure 239: HPLC spectrum of (±)-4i.**

Sample Name: ZY-09-167-6-EE

```

=====
Acq. Operator   : SYSTEM                      Seq. Line   :    3
Acq. Instrument : HPLC1260                   Location    : P1-C1
Injection Date  : 12/22/2021 2:39:59 PM      Inj         :    1
                                           Inj Volume  : 3.000 µl
Different Inj Volume from Sample Entry! Actual Inj Volume : 0.500 µl
Acq. Method     : E:\DATA\20211222\LC 2021-12-22 14-06-06\5I PA15_10_3-240.M
Last changed    : 12/22/2021 2:06:06 PM by SYSTEM
Analysis Method : E:\DATA\20211222\LC 2021-12-22 14-06-06\5I PA15_10_3-240.M (Sequence Method)
Last changed    : 12/22/2021 3:19:21 PM by SYSTEM
                (modified after loading)
    
```

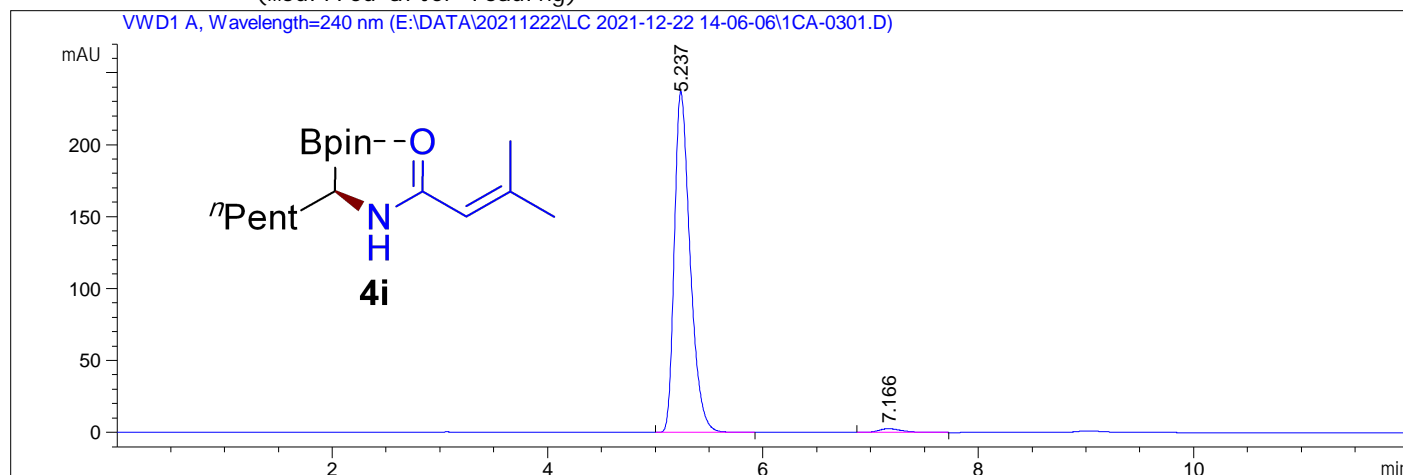

Area Percent Report

```

Sorted By      : Signal
Multiplier     : 1.0000
Dilution       : 1.0000
Do not use Multiplier & Dilution Factor with ISTDs
    
```

Signal 1: VWD1 A, Wavelength=240 nm

| Peak # | RetTime [min] | Type | Width [min] | Area [mAU*s] | Height [mAU] | Area %  |
|--------|---------------|------|-------------|--------------|--------------|---------|
| 1      | 5.237         | BB   | 0.1545      | 2407.39844   | 236.98210    | 98.3816 |
| 2      | 7.166         | BB   | 0.2291      | 39.60282     | 2.63921      | 1.6184  |

Totals : 2447.00126 239.62132

\*\*\* End of Report \*\*\*

Supplementary Figure 240: HPLC spectrum of 4i.



Sample Name: ZY-09-160-1-RAC

```

=====
Acq. Operator   : 系统                      Seq. Line   :    8
Acq. Instrument : HPLC-1260                  Location    :   31
Injection Date  : 11/20/2021 11:50:54 AM Inj         :    1
                                           Inj Volume  : 3.000 µl
Different Inj Volume from Sample Entry! Actual Inj Volume : 5.000 µl
Acq. Method     : D:\zy\20211023\YH 2021-11-20 09-04-54\5I PA20_10-1-6-254.M
Last changed    : 11/20/2021 9:33:00 AM by 系统
Analysis Method : E:\DATA\20220317\LC 2022-03-28 16-47-04\0.2I PA-40-0.5-1-XYH.M (Sequence
                Method)
Last changed    : 3/28/2022 11:00:12 PM by SYSTEM
                (modified after loading)
Additional Info : Peak(s) manually integrated
  
```

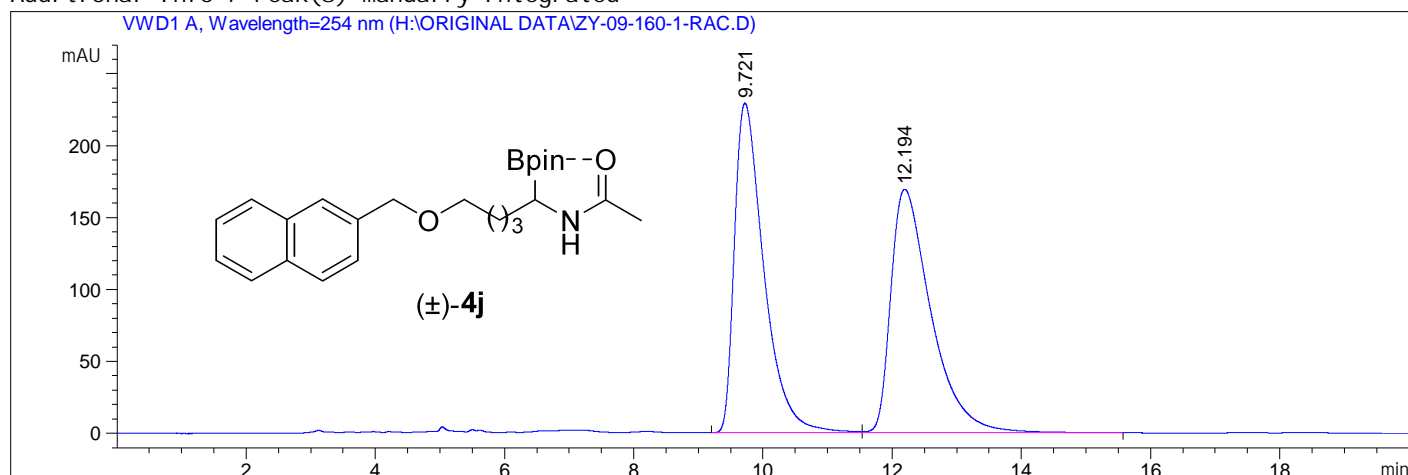

```

=====
Area Percent Report
=====
  
```

```

Sorted By      :      Signal
Multiplier     :      1.0000
Dilution       :      1.0000
Do not use Multiplier & Dilution Factor with ISTDs
  
```

Signal 1: VWD1 A, Wavelength=254 nm

| Peak # | RetTime [min] | Type | Width [min] | Area [mAU*s] | Height [mAU] | Area %  |
|--------|---------------|------|-------------|--------------|--------------|---------|
| 1      | 9.721         | BV   | 0.4782      | 7264.92676   | 229.26585    | 49.8054 |
| 2      | 12.194        | VB   | 0.6462      | 7321.70605   | 169.41502    | 50.1946 |

```
Totals :                      1.45866e4   398.68088
```

```

=====
*** End of Report ***
  
```

**Supplementary Figure 241: HPLC spectrum of (±)-4j.**

Sample Name: ZY-09-160-2-EE

```

=====
Acq. Operator   : 系统                      Seq. Line :    7
Acq. Instrument : HPLC-1260                 Location  :   32
Injection Date  : 11/20/2021 11:29:33 AM   Inj       :    1
                                           Inj Volume: 3.000 µl
Different Inj Volume from Sample Entry! Actual Inj Volume : 5.000 µl
Acq. Method     : D:\zy\20211023\YH 2021-11-20 09-04-54\5I PA20_10-1-6-254.M
Last changed    : 11/20/2021 9:33:00 AM by 系统
Analysis Method : E:\DATA\20220317\LC 2022-03-28 16-47-04\0.2I PA-40-0.5-1-XYH.M (Sequence
                  Method)
Last changed    : 3/28/2022 10:59:28 PM by SYSTEM
                  (modified after loading)
Additional Info  : Peak(s) manually integrated
  
```

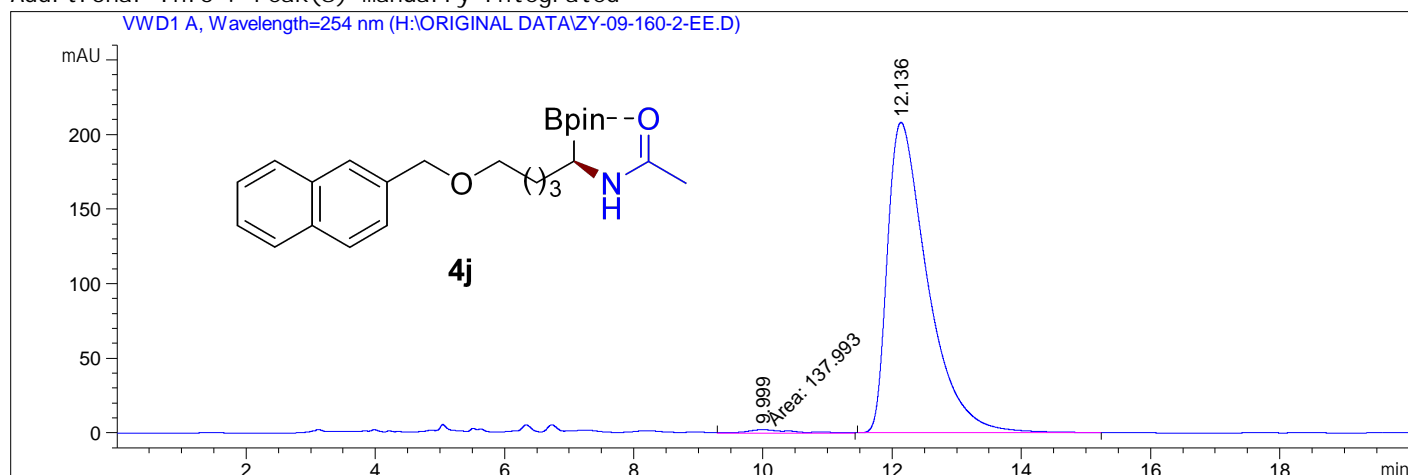

```

=====
Area Percent Report
=====
  
```

```

Sorted By      :      Signal
Multiplier     :      1.0000
Dilution      :      1.0000
Do not use Multiplier & Dilution Factor with ISTDs
  
```

Signal 1: VWD1 A, Wavelength=254 nm

| Peak # | RetTime [min] | Type | Width [min] | Area [mAU*s] | Height [mAU] | Area %  |
|--------|---------------|------|-------------|--------------|--------------|---------|
| 1      | 9.999         | MM   | 0.9422      | 137.99254    | 2.44099      | 1.5152  |
| 2      | 12.136        | BB   | 0.6388      | 8969.10059   | 208.12076    | 98.4848 |

```
Totals :                      9107.09312  210.56175
```

```

=====
*** End of Report ***
  
```

**Supplementary Figure 242: HPLC spectrum of 4j.**

Sample Name: ZY-09-166-7-0D

```

=====
Acq. Operator   : 系统                      Seq. Line :   13
Acq. Instrument : HPLC-1260                 Location  :   31
Injection Date  : 12/4/2021 12:57:37 PM     Inj       :    1
                                           Inj Volume: 3.000 µl
Different Inj Volume from Sample Entry! Actual Inj Volume : 0.500 µl
Acq. Method     : D:\zy\20211129\YH 2021-12-04 09-05-16\8IPA20_5-1-2-210.M
Last changed    : 12/4/2021 9:13:44 AM by 系统
Analysis Method : E:\DATA\20220316\LC 2022-03-16 22-19-08\10IPA-10-1.0-1.MZJ.M (Sequence
Method)
Last changed    : 3/28/2022 11:23:29 PM by SYSTEM
                (modified after loading)
Additional Info : Peak(s) manually integrated
  
```

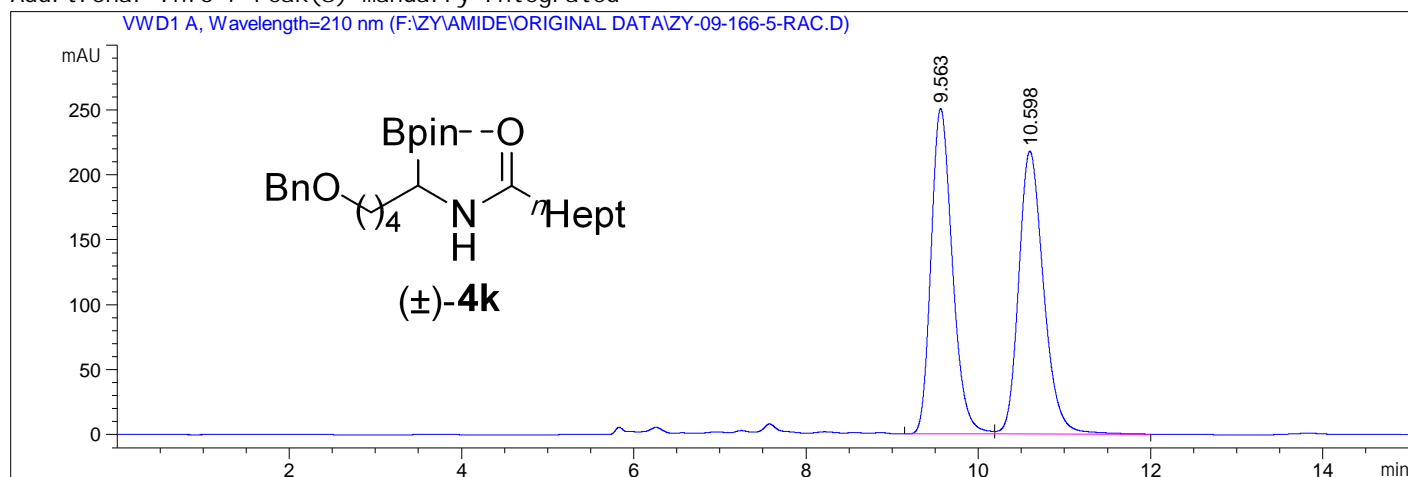

```

=====
                          Area Percent Report
=====
  
```

```

Sorted By      :      Signal
Multiplier     :      1.0000
Dilution       :      1.0000
Do not use Multiplier & Dilution Factor with ISTDs
  
```

Signal 1: VWD1 A, Wavelength=210 nm

| Peak # | RetTime [min] | Type | Width [min] | Area [mAU*s] | Height [mAU] | Area %  |
|--------|---------------|------|-------------|--------------|--------------|---------|
| 1      | 9.563         | BV   | 0.2638      | 4313.62402   | 250.64847    | 49.6492 |
| 2      | 10.598        | VB   | 0.3083      | 4374.57373   | 217.81007    | 50.3508 |

```
Totals :                      8688.19775  468.45854
```

```

=====
*** End of Report ***
  
```

**Supplementary Figure 243: HPLC spectrum of (±)-4k.**

Sample Name: ZY-09-166-5-EE

```

=====
Acq. Operator   : 系统                               Seq. Line :   14
Acq. Instrument : HPLC-1260                          Location  :   35
Injection Date  : 12/4/2021 1:18:58 PM                Inj       :    1
                                                    Inj Volume: 3.000 µl
Different Inj Volume from Sample Entry! Actual Inj Volume : 0.400 µl
Acq. Method     : D:\zy\20211129\YH 2021-12-04 09-05-16\8IPA20_5-1-2-210.M
Last changed    : 12/4/2021 9:13:44 AM by 系统
Analysis Method : E:\DATA\20220316\LC 2022-03-16 22-19-08\10IPA-10-1.0-1.MZWJ.M (Sequence
                Method)
Last changed    : 3/28/2022 11:22:39 PM by SYSTEM
                (modified after loading)
Additional Info  : Peak(s) manually integrated
    
```

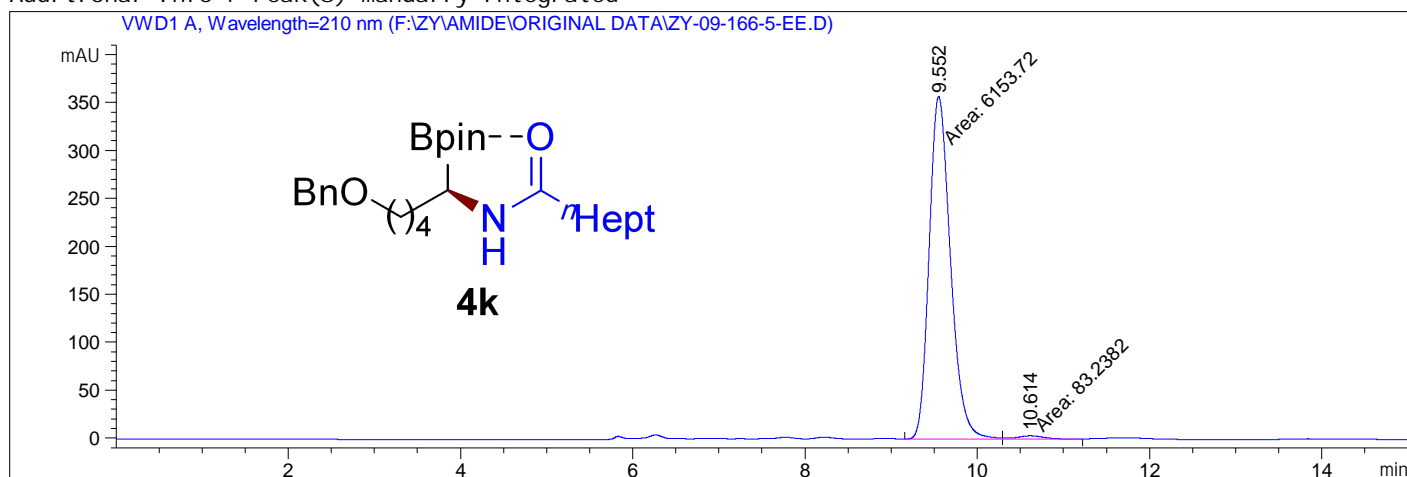

=====  
 Area Percent Report  
 =====

```

Sorted By      :      Signal
Multiplier     :      1.0000
Dilution       :      1.0000
Do not use Multiplier & Dilution Factor with ISTDs
    
```

Signal 1: VWD1 A, Wavelength=210 nm

| Peak # | RetTime [min] | Type | Width [min] | Area [mAU*s] | Height [mAU] | Area %  |
|--------|---------------|------|-------------|--------------|--------------|---------|
| 1      | 9.552         | MF   | 0.2872      | 6153.71680   | 357.14899    | 98.6654 |
| 2      | 10.614        | FM   | 0.3918      | 83.23817     | 3.54073      | 1.3346  |

Totals :                      6236.95496    360.68971

=====  
 \*\*\* End of Report \*\*\*

**Supplementary Figure 244: HPLC spectrum of 4k.**

Sample Name: ZY-10-115-2-9

```

=====
Acq. Operator   : 系统                      Seq. Line :   45
Acq. Instrument : HPLC-1260                 Location  :   52
Injection Date  : 8/20/2022 8:27:49 PM      Inj       :    1
                                           Inj Volume: 3.000 µl
Different Inj Volume from Sample Entry! Actual Inj Volume : 2.000 µl
Acq. Method     : D:\zy\20220803\YH 2022-08-20 08-41-06\5I PA16_10-1-2-210.M
Last changed    : 8/20/2022 3:56:20 PM by 系统
Analysis Method : E:\DATA\20220317\LC 2022-08-22 08-37-45\5I PA-40-1.0-1-220-ODY.M (Sequence
                  Method)
Last changed    : 8/22/2022 7:20:24 PM by SYSTEM
                  (modified after loading)
Additional Info : Peak(s) manually integrated
  
```

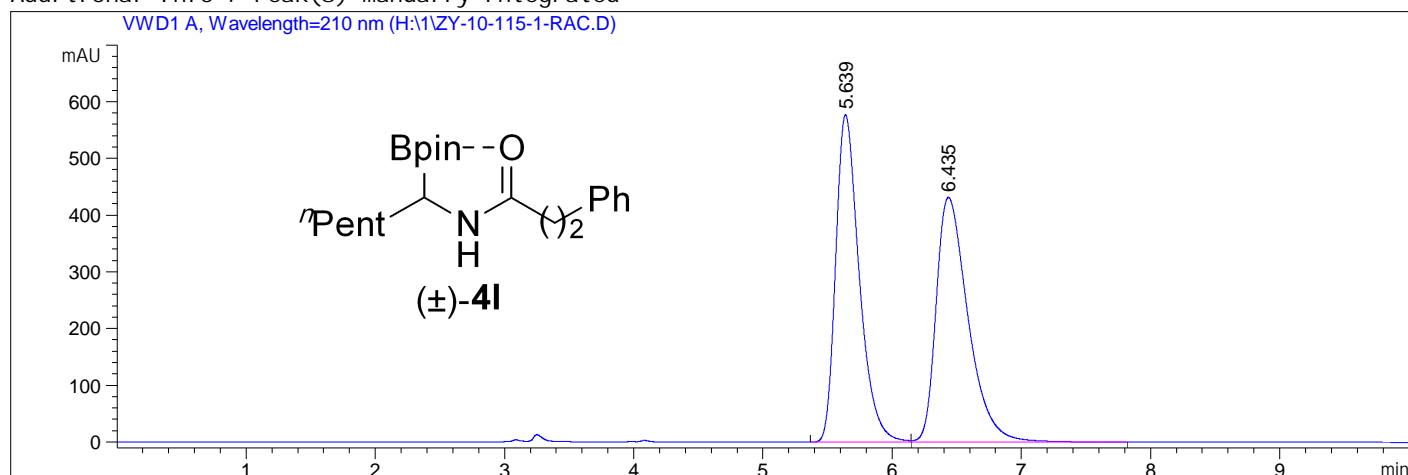

```

=====
Area Percent Report
=====
  
```

```

Sorted By      :      Signal
Multiplier     :      1.0000
Dilution       :      1.0000
Do not use Multiplier & Dilution Factor with ISTDs
  
```

Signal 1: VWD1 A, Wavelength=210 nm

| Peak # | RetTime [min] | Type | Width [min] | Area [mAU*s] | Height [mAU] | Area %  |
|--------|---------------|------|-------------|--------------|--------------|---------|
| 1      | 5.639         | BV   | 0.1913      | 7313.53271   | 577.17682    | 49.6464 |
| 2      | 6.435         | VV R | 0.2596      | 7417.70801   | 431.49738    | 50.3536 |

```
Totals :                1.47312e4  1008.67419
```

```

=====
*** End of Report ***
  
```

**Supplementary Figure 245: HPLC spectrum of (±)-4I.**

Sample Name: ZY-10-115-1-EE1

```

=====
Acq. Operator   : 系统                               Seq. Line :   50
Acq. Instrument : HPLC-1260                          Location  :   58
Injection Date  : 8/20/2022 9:53:47 PM                Inj       :    1
                                                    Inj Volume: 3.000 µl
Different Inj Volume from Sample Entry! Actual Inj Volume : 1.000 µl
Acq. Method     : D:\zy\20220803\YH 2022-08-20 08-41-06\5I PA16_10-1-2-210.M
Last changed    : 8/20/2022 9:47:09 PM by 系统
Analysis Method : E:\DATA\20220317\LC 2022-08-22 08-37-45\5I PA-40-1.0-1-220-ODY.M (Sequence
                Method)
Last changed    : 8/22/2022 7:19:25 PM by SYSTEM
                (modified after loading)
Additional Info : Peak(s) manually integrated
  
```

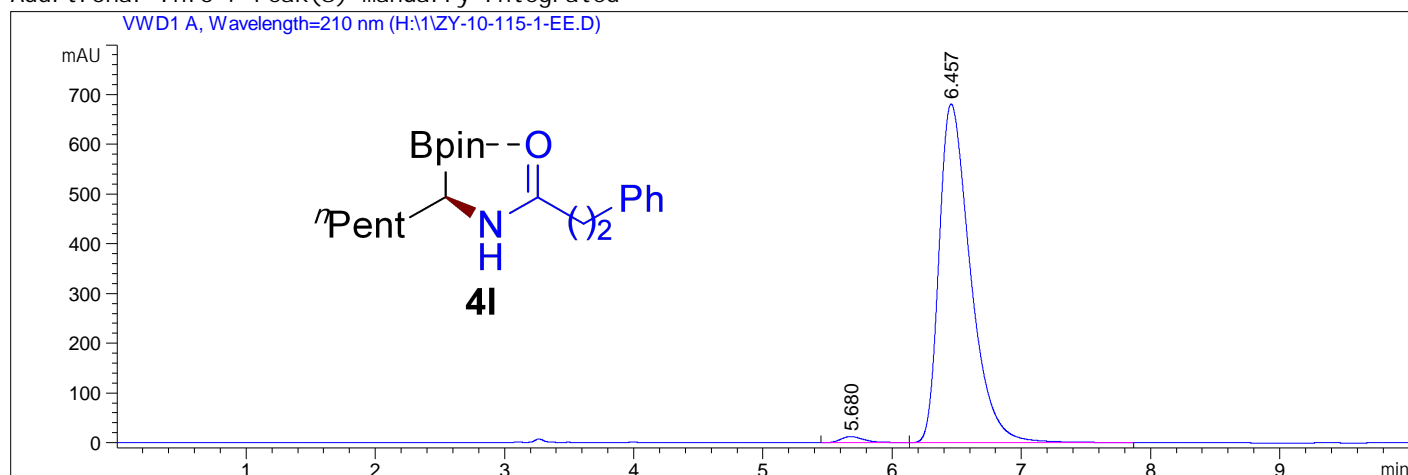

```

=====
Area Percent Report
=====
  
```

```

Sorted By      :      Signal
Multiplier     :      1.0000
Dilution       :      1.0000
Do not use Multiplier & Dilution Factor with ISTDs
  
```

Signal 1: VWD1 A, Wavelength=210 nm

| Peak # | RetTime [min] | Type | Width [min] | Area [mAU*s] | Height [mAU] | Area %  |
|--------|---------------|------|-------------|--------------|--------------|---------|
| 1      | 5.680         | BV   | 0.1935      | 161.75188    | 12.53654     | 1.3883  |
| 2      | 6.457         | VB   | 0.2532      | 1.14890e4    | 681.26971    | 98.6117 |

```
Totals :                1.16508e4  693.80625
```

```

=====
*** End of Report ***
  
```

**Supplementary Figure 246: HPLC spectrum of 41.**

Sample Name: ZY-09-188-1-RAC

```

=====
Acq. Operator   : 系统                      Seq. Line :    8
Acq. Instrument : HPLC-1260                 Location  :   52
Injection Date  : 12/19/2021 5:05:45 PM    Inj       :    1
                                           Inj Volume: 3.000 µl
Different Inj Volume from Sample Entry! Actual Inj Volume : 0.500 µl
Acq. Method     : D:\zy\20211219\YH 2021-12-19 15-11-05\10IPA15_10-1-6-220-FZ.M
Last changed    : 12/19/2021 3:11:05 PM by 系统
Analysis Method : E:\DATA\20220316\LC 2022-03-16 22-19-08\0.6IPA-15-0.8-1-210-JXL.M (Sequence
Method)
Last changed    : 3/29/2022 9:32:27 AM by SYSTEM
                (modified after loading)
Additional Info : Peak(s) manually integrated
  
```

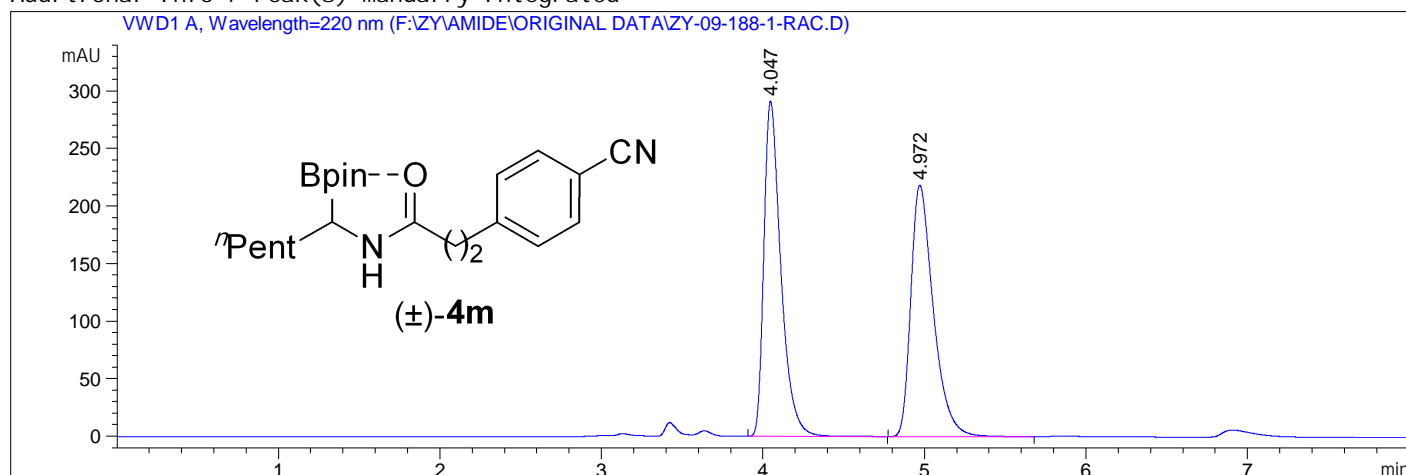

```

=====
Area Percent Report
=====
  
```

```

Sorted By      :      Signal
Multiplier     :      1.0000
Dilution       :      1.0000
Do not use Multiplier & Dilution Factor with ISTDs
  
```

Signal 1: VWD1 A, Wavelength=220 nm

| Peak # | RetTime [min] | Type | Width [min] | Area [mAU*s] | Height [mAU] | Area %  |
|--------|---------------|------|-------------|--------------|--------------|---------|
| 1      | 4.047         | BV R | 0.1112      | 2139.70337   | 291.44876    | 50.2747 |
| 2      | 4.972         | BB   | 0.1464      | 2116.31763   | 218.64890    | 49.7253 |

```
Totals :                4256.02100  510.09766
```

```

=====
*** End of Report ***
  
```

**Supplementary Figure 247: HPLC spectrum of (±)-4m.**

Sample Name: ZY-09-188-1-EE

```

=====
Acq. Operator   : 系统                               Seq. Line :    6
Acq. Instrument : HPLC-1260                          Location  :   51
Injection Date  : 12/19/2021 4:33:36 PM              Inj       :    1
                                                    Inj Volume: 3.000 µl
Different Inj Volume from Sample Entry! Actual Inj Volume : 0.400 µl
Acq. Method    : D:\zy\20211219\YH 2021-12-19 15-11-05\10IPA15_10-1-6-220-FZ.M
Last changed   : 12/19/2021 3:11:05 PM by 系统
Analysis Method : E:\DATA\20220316\LC 2022-03-16 22-19-08\0.6IPA-15-0.8-1-210-JXL.M (Sequence
                Method)
Last changed   : 3/29/2022 9:31:28 AM by SYSTEM
                (modified after loading)
Additional Info : Peak(s) manually integrated
    
```

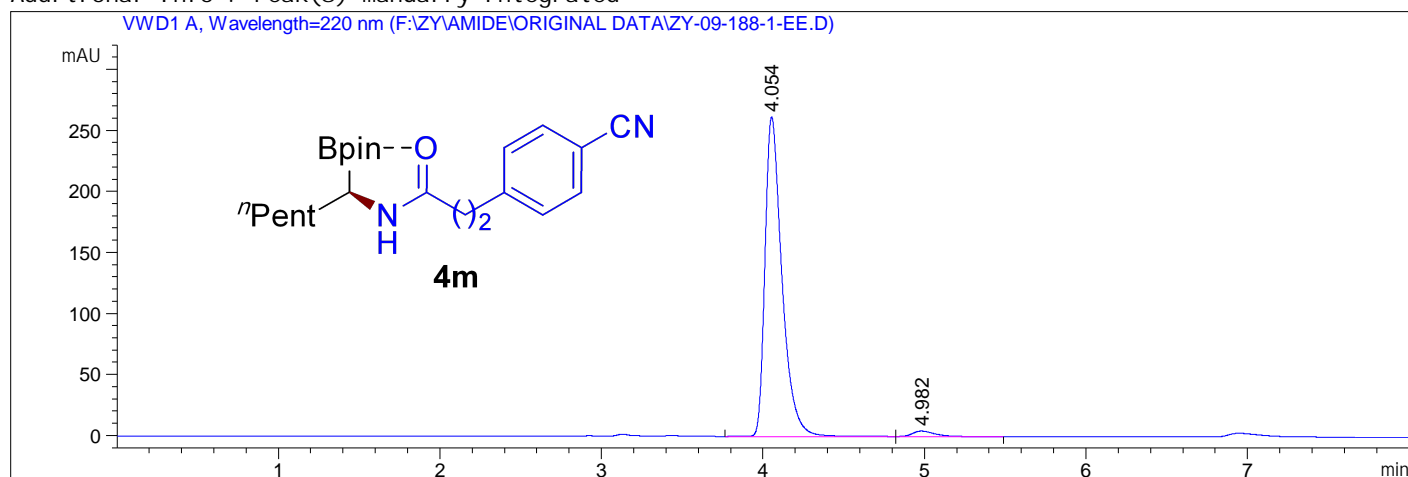

Area Percent Report

```

Sorted By      :      Signal
Multiplier     :      1.0000
Dilution      :      1.0000
Do not use Multiplier & Dilution Factor with ISTDs
    
```

Signal 1: VWD1 A, Wavelength=220 nm

| Peak # | RetTime [min] | Type | Width [min] | Area [mAU*s] | Height [mAU] | Area %  |
|--------|---------------|------|-------------|--------------|--------------|---------|
| 1      | 4.054         | VV R | 0.1098      | 1915.36646   | 261.94006    | 97.7296 |
| 2      | 4.982         | VB   | 0.1468      | 44.49722     | 4.54354      | 2.2704  |

Totals :                      1959.86367   266.48360

\*\*\* End of Report \*\*\*

**Supplementary Figure 248: HPLC spectrum of 4m.**



Sample Name: ZY-09-188-6-RAC

```

=====
Acq. Operator   : 系统                      Seq. Line :   43
Acq. Instrument : HPLC-1260                 Location  :   52
Injection Date  : 12/19/2021 3:00:44 AM     Inj       :    1
                                           Inj Volume: 3.000 µl
Different Inj Volume from Sample Entry! Actual Inj Volume : 0.400 µl
Acq. Method    : D:\zy\20211129\YH 2021-12-18 15-56-07\5I PA15_8-1-6-220.M
Last changed   : 12/18/2021 7:59:12 PM by 系统
Analysis Method : E:\DATA\20220316\LC 2022-03-16 22-19-08\0.6I PA-15-0.8-1-210-JXL.M (Sequence
Method)
Last changed   : 3/29/2022 9:35:09 AM by SYSTEM
                (modified after loading)
Additional Info : Peak(s) manually integrated
  
```

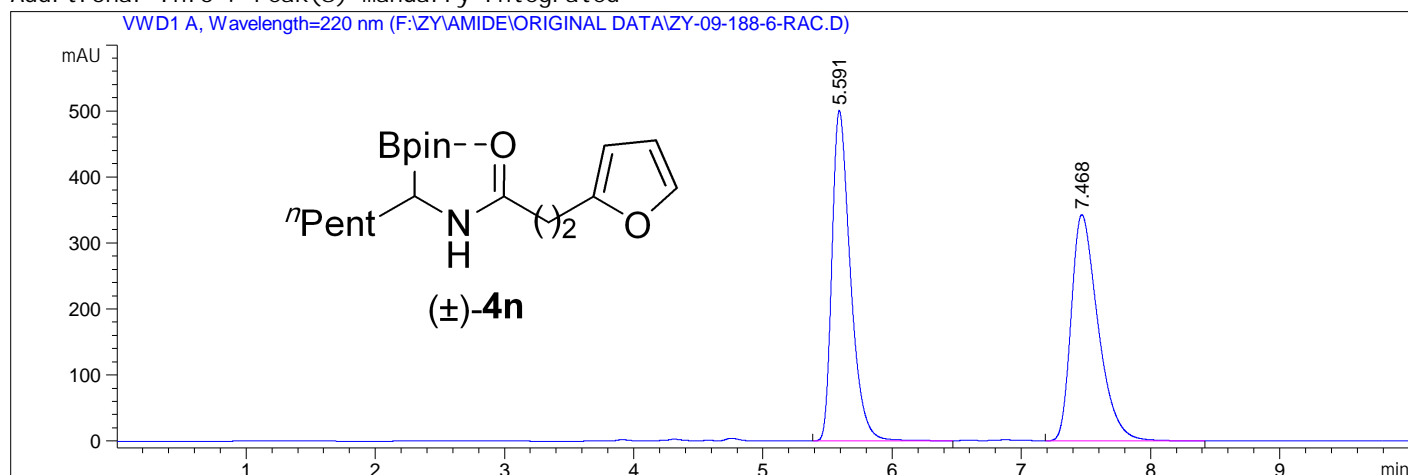

```

=====
                          Area Percent Report
=====
  
```

```

Sorted By      :      Signal
Multiplier     :      1.0000
Dilution      :      1.0000
Do not use Multiplier & Dilution Factor with ISTDs
  
```

Signal 1: VWD1 A, Wavelength=220 nm

| Peak # | RetTime [min] | Type | Width [min] | Area [mAU*s] | Height [mAU] | Area %  |
|--------|---------------|------|-------------|--------------|--------------|---------|
| 1      | 5.591         | BV R | 0.1505      | 4951.50684   | 499.95935    | 50.0940 |
| 2      | 7.468         | BB   | 0.2189      | 4932.93262   | 342.67126    | 49.9060 |

```
Totals :                      9884.43945  842.63062
```

```

=====
*** End of Report ***
  
```

**Supplementary Figure 249: HPLC spectrum of (±)-4n.**



Sample Name: ZY-09-195-5-RAC

```

=====
Acq. Operator   : 系统                      Seq. Line :    8
Acq. Instrument : HPLC-1260                 Location  :   62
Injection Date  : 12/31/2021 6:45:20 PM    Inj       :    1
                                           Inj Volume: 3.000 µl
Different Inj Volume from Sample Entry! Actual Inj Volume : 1.000 µl
Acq. Method     : D:\zy\20211226\YH 2021-12-31 16-20-46\5IPA-15-1.0-1-2-220.M
Last changed    : 12/31/2021 5:46:49 PM by 系统
Analysis Method : E:\DATA\20220316\LC 2022-03-16 22-19-08\10IPA-10-1.0-1.MZJ.M (Sequence
                  Method)
Last changed    : 3/29/2022 9:53:44 AM by SYSTEM
                  (modified after loading)
Additional Info  : Peak(s) manually integrated
  
```

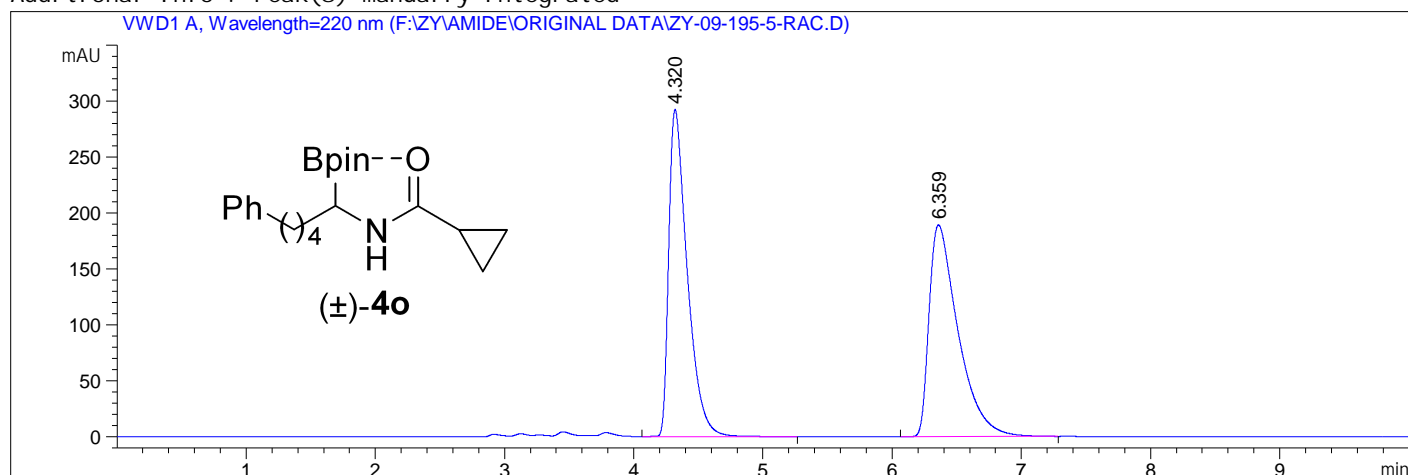

```

=====
                          Area Percent Report
=====
  
```

```

Sorted By      :      Signal
Multiplier     :      1.0000
Dilution       :      1.0000
Do not use Multiplier & Dilution Factor with ISTDs
  
```

Signal 1: VWD1 A, Wavelength=220 nm

| Peak # | RetTime [min] | Type | Width [min] | Area [mAU*s] | Height [mAU] | Area %  |
|--------|---------------|------|-------------|--------------|--------------|---------|
| 1      | 4.320         | BB   | 0.1479      | 2904.71558   | 292.34595    | 49.6171 |
| 2      | 6.359         | BB   | 0.2328      | 2949.54614   | 189.23438    | 50.3829 |

```
Totals :                      5854.26172  481.58032
```

```

=====
*** End of Report ***
  
```

**Supplementary Figure 251: HPLC spectrum of (±)-4o.**

Sample Name: ZY-09-195-5-EE

```

=====
Acq. Operator   : 系统                      Seq. Line :    9
Acq. Instrument : HPLC-1260                 Location  :   61
Injection Date  : 12/31/2021 7:01:41 PM      Inj       :    1
                                           Inj Volume: 3.000 µl
Different Inj Volume from Sample Entry! Actual Inj Volume : 1.800 µl
Acq. Method    : D:\zy\20211226\YH 2021-12-31 16-20-46\5IPA-15-1.0-1-2-220.M
Last changed   : 12/31/2021 5:46:49 PM by 系统
Analysis Method : E:\DATA\20220316\LC 2022-03-16 22-19-08\10IPA-10-1.0-1.MZJ.M (Sequence
                    Method)
Last changed   : 3/29/2022 9:54:16 AM by SYSTEM
                    (modified after loading)
Additional Info : Peak(s) manually integrated
    
```

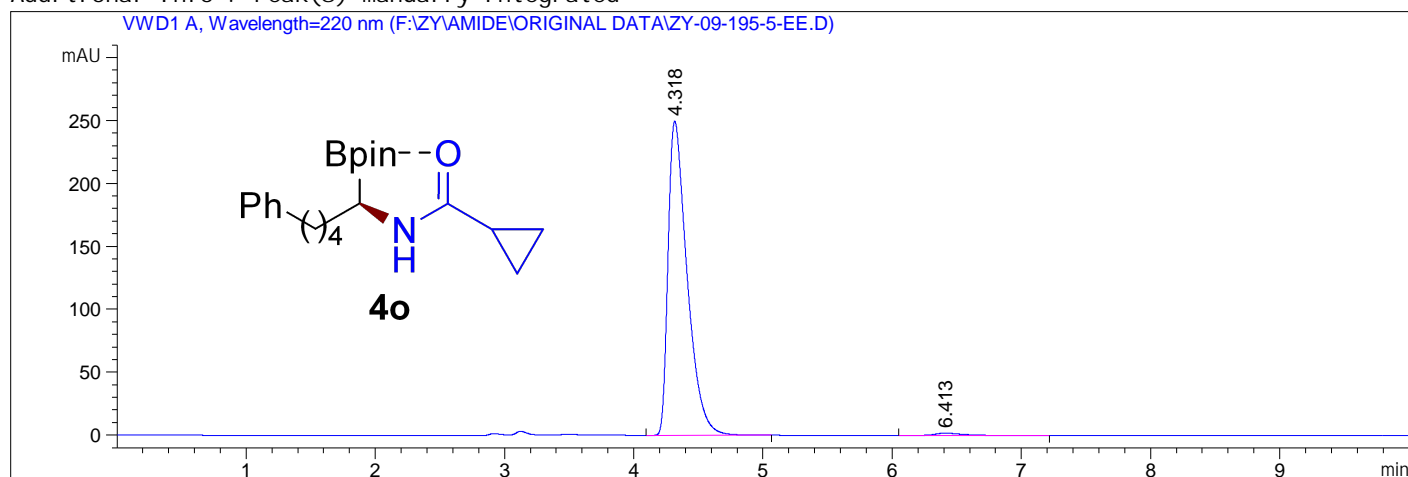

=====  
 Area Percent Report  
 =====

```

Sorted By      :      Signal
Multiplier     :      1.0000
Dilution       :      1.0000
Do not use Multiplier & Dilution Factor with ISTDs
    
```

Signal 1: VWD1 A, Wavelength=220 nm

| Peak # | RetTime [min] | Type | Width [min] | Area [mAU*s] | Height [mAU] | Area %  |
|--------|---------------|------|-------------|--------------|--------------|---------|
| 1      | 4.318         | BB   | 0.1538      | 2553.71533   | 249.79950    | 98.7791 |
| 2      | 6.413         | BB   | 0.2204      | 31.56495     | 1.86559      | 1.2209  |

Totals :                      2585.28028   251.66509

=====  
 \*\*\* End of Report \*\*\*

**Supplementary Figure 252: HPLC spectrum of 4o.**

Sample Name: ZY-10-24-2-RAC

```

=====
Acq. Operator   : 系统                      Seq. Line :   19
Acq. Instrument : HPLC-1260                 Location  :   82
Injection Date  : 2/15/2022 8:34:49 PM      Inj       :    1
                                           Inj Volume: 3.000 µl
Different Inj Volume from Sample Entry! Actual Inj Volume : 2.600 µl
Acq. Method     : D:\zy\20220201\YH 2022-02-15 14-53-54\5I PA20_10-1-2-210.M
Last changed    : 2/15/2022 7:02:39 PM by 系统
Analysis Method : E:\DATA\20220316\LC 2022-03-16 22-19-08\10I PA-10-1.0-1.MZJ.M (Sequence
Method)
Last changed    : 3/29/2022 10:00:58 AM by SYSTEM
                (modified after loading)
Additional Info : Peak(s) manually integrated
  
```

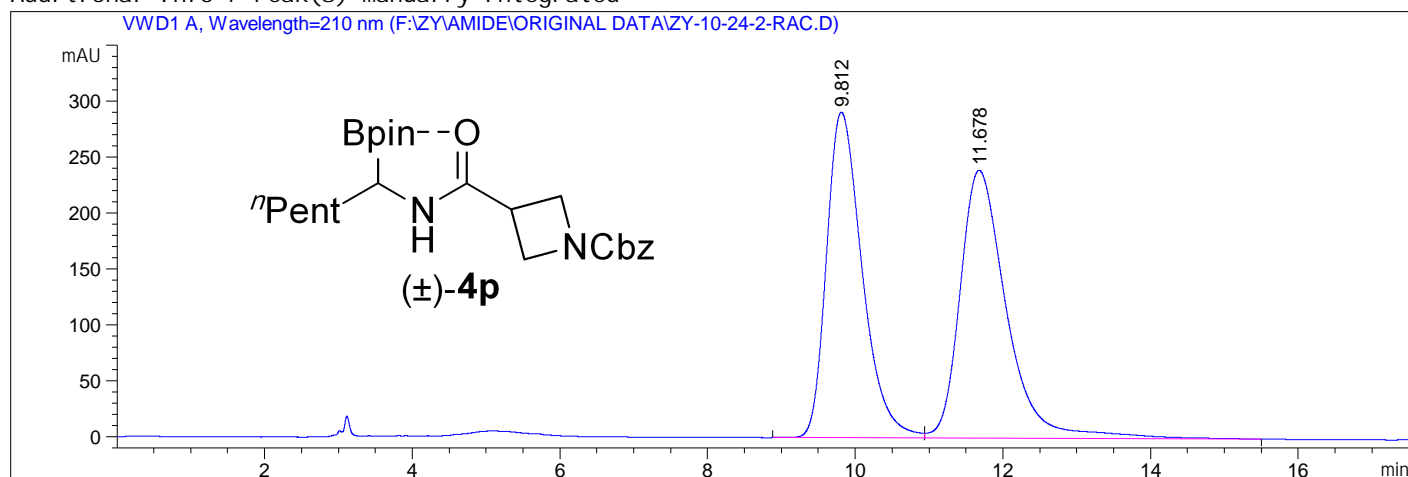

```

=====
                          Area Percent Report
=====
  
```

```

Sorted By      :      Signal
Multiplier     :      1.0000
Dilution       :      1.0000
Do not use Multiplier & Dilution Factor with ISTDs
  
```

Signal 1: VWD1 A, Wavelength=210 nm

| Peak # | RetTime [min] | Type | Width [min] | Area [mAU*s] | Height [mAU] | Area %  |
|--------|---------------|------|-------------|--------------|--------------|---------|
| 1      | 9.812         | BV   | 0.5117      | 9773.50684   | 291.12683    | 48.2130 |
| 2      | 11.678        | VB   | 0.6469      | 1.04980e4    | 239.47452    | 51.7870 |

```
Totals :                2.02715e4  530.60135
```

```

=====
*** End of Report ***
  
```

**Supplementary Figure 253: HPLC spectrum of (±)-4p.**

Sample Name: ZY-10-24-2-EE

```

=====
Acq. Operator   : 系统                      Seq. Line :   18
Acq. Instrument : HPLC-1260                 Location  :   81
Injection Date  : 2/15/2022 8:13:24 PM      Inj       :    1
                                           Inj Volume: 3.000 µl
Different Inj Volume from Sample Entry! Actual Inj Volume : 2.800 µl
Acq. Method     : D:\zy\20220201\YH 2022-02-15 14-53-54\5I PA20_10-1-2-210.M
Last changed    : 2/15/2022 7:02:39 PM by 系统
Analysis Method : E:\DATA\20220316\LC 2022-03-16 22-19-08\10I PA-10-1.0-1.MZJ.M (Sequence
Method)
Last changed    : 3/29/2022 10:00:58 AM by SYSTEM
                (modified after loading)
Additional Info : Peak(s) manually integrated
  
```

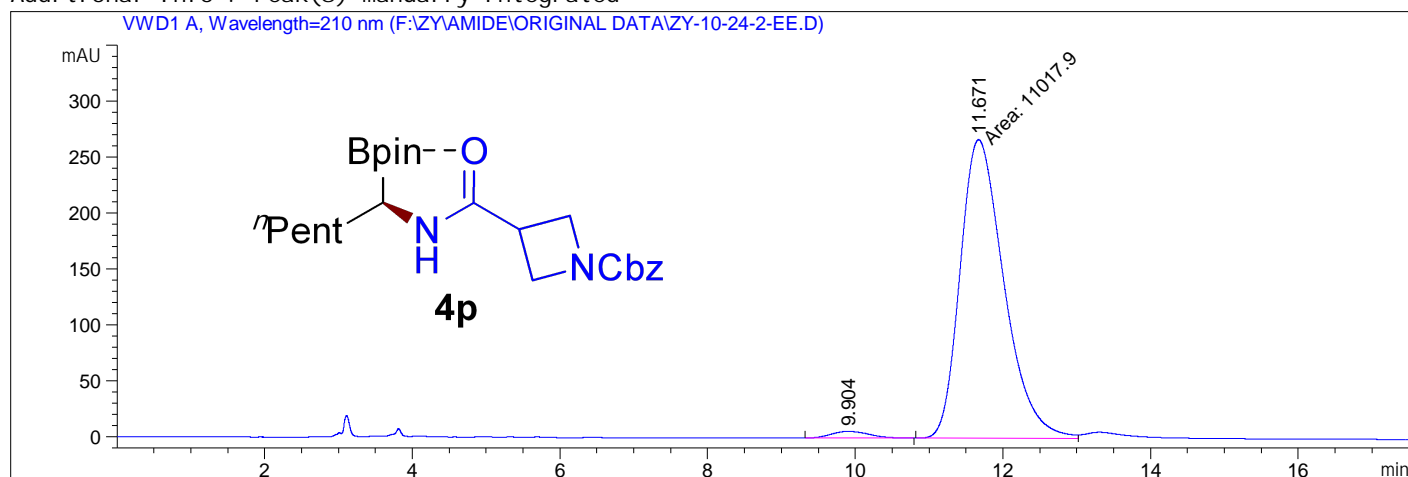

```

=====
                          Area Percent Report
=====
  
```

```

Sorted By      :      Signal
Multiplier     :      1.0000
Dilution      :      1.0000
Do not use Multiplier & Dilution Factor with ISTDs
  
```

Signal 1: VWD1 A, Wavelength=210 nm

| Peak # | RetTime [min] | Type | Width [min] | Area [mAU*s] | Height [mAU] | Area %  |
|--------|---------------|------|-------------|--------------|--------------|---------|
| 1      | 9.904         | BV R | 0.4181      | 211.22409    | 5.92163      | 1.8810  |
| 2      | 11.671        | MF   | 0.6879      | 1.10179e4    | 266.93561    | 98.1190 |

```
Totals :                      1.12291e4  272.85724
```

```

=====
*** End of Report ***
  
```

**Supplementary Figure 254: HPLC spectrum of 4p.**

Sample Name: ZY-09-166-1-RAC

```

=====
Acq. Operator   : 系统                               Seq. Line :   10
Acq. Instrument : HPLC-1260                          Location  :    1
Injection Date  : 12/3/2021 12:10:23 PM              Inj       :    1
                                                    Inj Volume: 3.000 µl
Different Inj Volume from Sample Entry! Actual Inj Volume : 1.800 µl
Acq. Method    : D:\zy\20211203\YH 2021-12-03 09-47-06\5IPA-20-1.0-1-6-220-JXL.M
Last changed   : 12/3/2021 11:14:35 AM by 系统
Analysis Method : E:\DATA\20220316\LC 2022-03-16 22-19-08\10IPA-10-1.0-1.MZWJ.M (Sequence
                Method)
Last changed   : 3/28/2022 11:19:50 PM by SYSTEM
                (modified after loading)
Additional Info : Peak(s) manually integrated
    
```

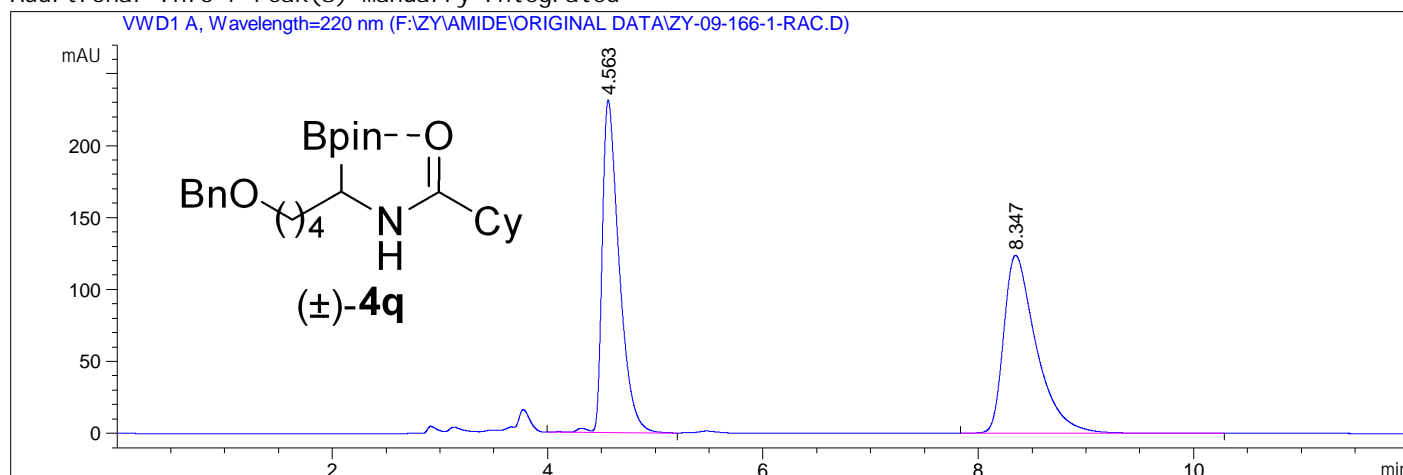

Area Percent Report

```

Sorted By      :      Signal
Multiplier     :      1.0000
Dilution       :      1.0000
Do not use Multiplier & Dilution Factor with ISTDs
    
```

Signal 1: VWD1 A, Wavelength=220 nm

| Peak # | RetTime [min] | Type | Width [min] | Area [mAU*s] | Height [mAU] | Area %  |
|--------|---------------|------|-------------|--------------|--------------|---------|
| 1      | 4.563         | VB R | 0.1617      | 2529.77661   | 231.13509    | 49.2039 |
| 2      | 8.347         | BB   | 0.3129      | 2611.63428   | 123.91994    | 50.7961 |

Totals : 5141.41089 355.05503

\*\*\* End of Report \*\*\*

Supplementary Figure 255: HPLC spectrum of (±)-4q.

Sample Name: ZY-09-166-1-EE

```

=====
Acq. Operator   : 系统                               Seq. Line :    9
Acq. Instrument : HPLC-1260                           Location  :    2
Injection Date  : 12/3/2021 11:53:59 AM              Inj       :    1
                                                    Inj Volume: 3.000 µl
Different Inj Volume from Sample Entry! Actual Inj Volume : 1.800 µl
Acq. Method     : D:\zy\20211203\YH 2021-12-03 09-47-06\5IPA-20-1.0-1-6-220-JXL.M
Last changed    : 12/3/2021 11:14:35 AM by 系统
Analysis Method : E:\DATA\20220316\LC 2022-03-16 22-19-08\10IPA-10-1.0-1.MZWJ.M (Sequence
                Method)
Last changed    : 3/28/2022 11:19:09 PM by SYSTEM
                (modified after loading)
Additional Info : Peak(s) manually integrated
    
```

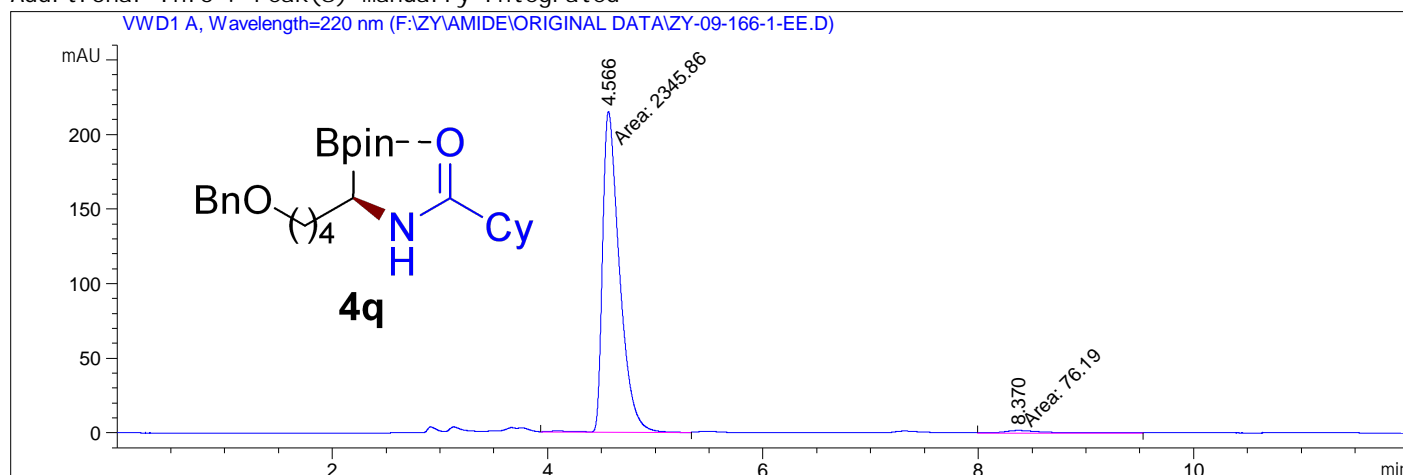

Area Percent Report

```

Sorted By      :      Signal
Multiplier     :      1.0000
Dilution       :      1.0000
Do not use Multiplier & Dilution Factor with ISTDs
    
```

Signal 1: VWD1 A, Wavelength=220 nm

| Peak # | RetTime [min] | Type | Width [min] | Area [mAU*s] | Height [mAU] | Area %  |
|--------|---------------|------|-------------|--------------|--------------|---------|
| 1      | 4.566         | MF   | 0.1819      | 2345.85986   | 214.88185    | 96.8543 |
| 2      | 8.370         | MM   | 0.6441      | 76.19001     | 1.97147      | 3.1457  |

Totals :                      2422.04987   216.85332

\*\*\* End of Report \*\*\*

Supplementary Figure 256: HPLC spectrum of 4q.



Sample Name: ZY-09-167-1-RAC

```

=====
Acq. Operator   : 系统                      Seq. Line   :    4
Acq. Instrument : HPLC-1260                  Location    :   31
Injection Date  : 12/5/2021 10:10:44 PM    Inj         :    1
                                           Inj Volume  : 3.000 µl
Different Inj Volume from Sample Entry! Actual Inj Volume : 1.800 µl
Acq. Method    : D:\zy\20211129\YH 2021-12-05 21-28-00\5IPA-15-1-1-2-220-JXL.M
Last changed   : 12/5/2021 9:53:06 PM by 系统
Analysis Method : E:\DATA\20220316\LC 2022-03-16 22-19-08\10IPA-10-1.0-1.MZWJ.M (Sequence
                Method)
Last changed   : 3/28/2022 11:26:24 PM by SYSTEM
                (modified after loading)
Additional Info : Peak(s) manually integrated
  
```

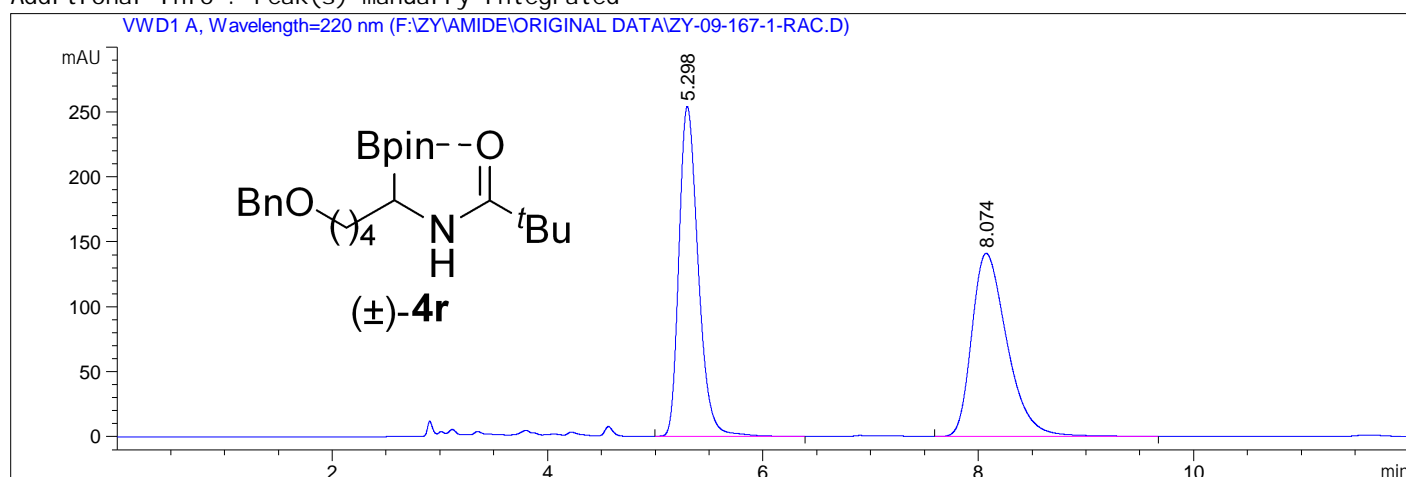

```

=====
Area Percent Report
=====
  
```

```

Sorted By      :      Signal
Multiplier     :      1.0000
Dilution       :      1.0000
Do not use Multiplier & Dilution Factor with ISTDs
  
```

Signal 1: VWD1 A, Wavelength=220 nm

| Peak # | RetTime [min] | Type | Width [min] | Area [mAU*s] | Height [mAU] | Area %  |
|--------|---------------|------|-------------|--------------|--------------|---------|
| 1      | 5.298         | BB   | 0.1920      | 3145.98950   | 253.95166    | 49.5685 |
| 2      | 8.074         | BB   | 0.3471      | 3200.76025   | 140.88438    | 50.4315 |

```

Totals :                      6346.74976  394.83604
  
```

```

=====
*** End of Report ***
  
```

**Supplementary Figure 257: HPLC spectrum of (±)-4r.**

Sample Name: ZY-09-167-1-EE

```

=====
Acq. Operator   : 系统                      Seq. Line :    3
Acq. Instrument : HPLC-1260                 Location  :   32
Injection Date  : 12/5/2021 9:53:10 PM      Inj       :    1
                                           Inj Volume: 3.000 µl
Different Inj Volume from Sample Entry! Actual Inj Volume : 1.600 µl
Acq. Method     : D:\zy\20211129\YH 2021-12-05 21-28-00\5IPA-15-1-1-2-220-JXL.M
Last changed    : 12/5/2021 9:53:06 PM by 系统
                                           (modified after loading)
Analysis Method : E:\DATA\20220316\LC 2022-03-16 22-19-08\10IPA-10-1.0-1.MZWJ.M (Sequence
                                           Method)
Last changed    : 3/28/2022 11:25:31 PM by SYSTEM
                                           (modified after loading)
Additional Info : Peak(s) manually integrated
    
```

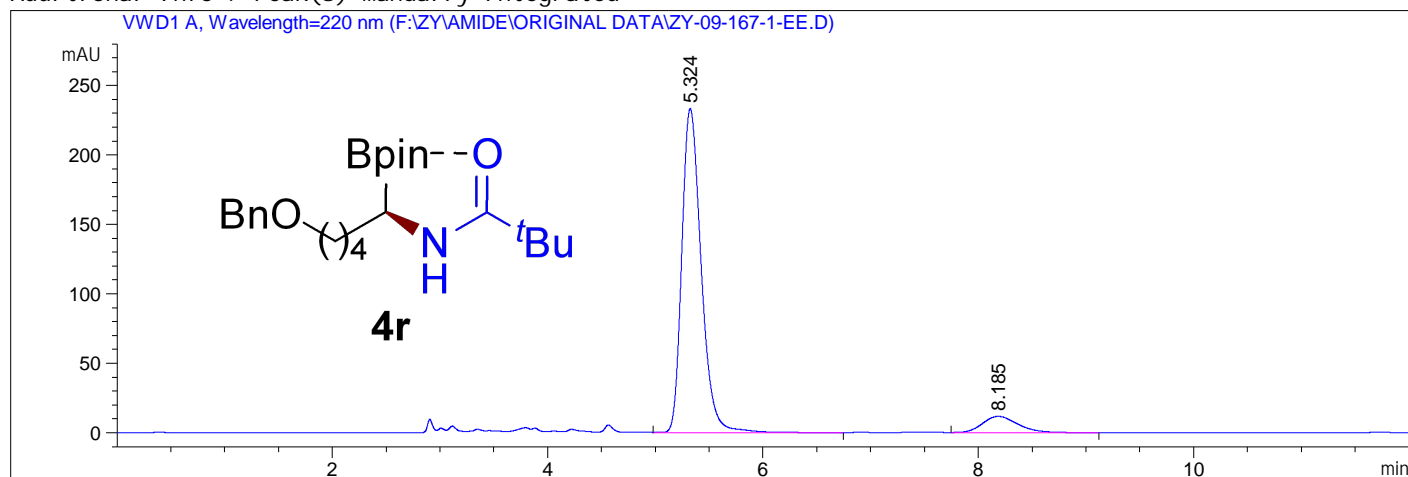

Area Percent Report

```

Sorted By      :      Signal
Multiplier     :      1.0000
Dilution       :      1.0000
Do not use Multiplier & Dilution Factor with ISTDs
    
```

Signal 1: VWD1 A, Wavelength=220 nm

| Peak # | RetTime [min] | Type | Width [min] | Area [mAU*s] | Height [mAU] | Area %  |
|--------|---------------|------|-------------|--------------|--------------|---------|
| 1      | 5.324         | BB   | 0.1931      | 2913.18408   | 233.36481    | 91.6417 |
| 2      | 8.185         | BB   | 0.3437      | 265.69937    | 11.66675     | 8.3583  |

Totals : 3178.88345 245.03156

\*\*\* End of Report \*\*\*

Supplementary Figure 258: HPLC spectrum of 4r.

Sample Name: ZY-09-194-5-RAC

```

=====
Acq. Operator   : 系统                               Seq. Line :    7
Acq. Instrument : HPLC-1260                           Location  :   22
Injection Date  : 1/3/2022 10:53:04 AM                Inj       :    1
                                                    Inj Volume: 3.000 µl
Different Inj Volume from Sample Entry! Actual Inj Volume : 1.600 µl
Acq. Method     : D:\zy\20211226\YH 2022-01-03 09-22-34\5IPA-15-1.0-1-2-220.M
Last changed    : 1/3/2022 10:03:22 AM by 系统
Analysis Method : E:\DATA\20220316\LC 2022-03-16 22-19-08\10IPA-10-1.0-1.MZWJ.M (Sequence
                Method)
Last changed    : 3/29/2022 9:49:15 AM by SYSTEM
                (modified after loading)
Additional Info : Peak(s) manually integrated
  
```

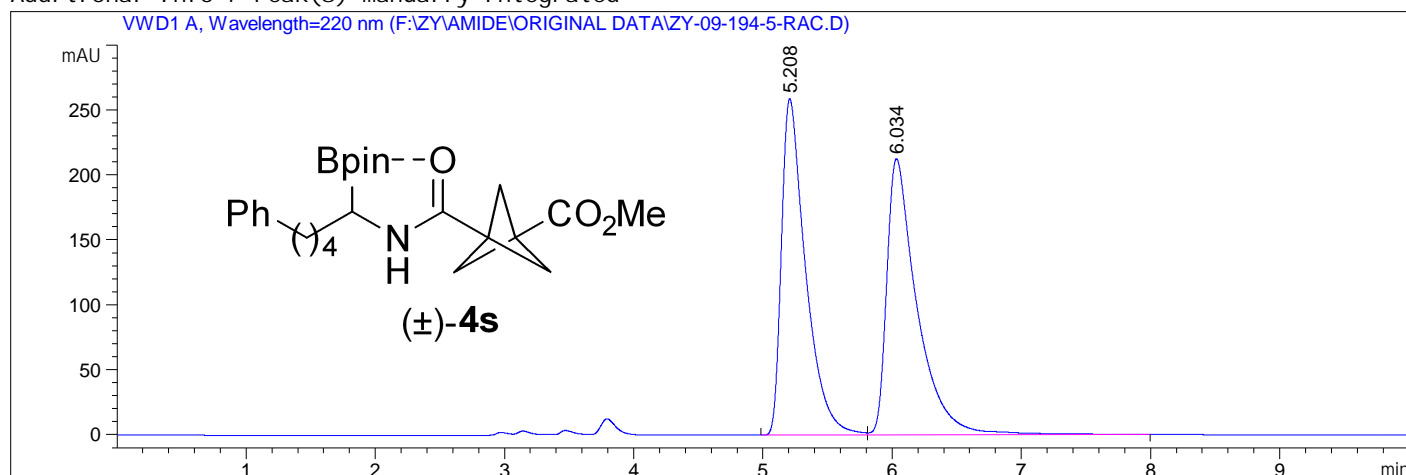

```

=====
Area Percent Report
=====
  
```

```

Sorted By      :      Signal
Multiplier     :      1.0000
Dilution       :      1.0000
Do not use Multiplier & Dilution Factor with ISTDs
  
```

Signal 1: VWD1 A, Wavelength=220 nm

| Peak # | RetTime [min] | Type | Width [min] | Area [mAU*s] | Height [mAU] | Area %  |
|--------|---------------|------|-------------|--------------|--------------|---------|
| 1      | 5.208         | BV   | 0.1897      | 3366.52661   | 258.92990    | 49.2252 |
| 2      | 6.034         | VV R | 0.2345      | 3472.50415   | 212.65123    | 50.7748 |

```
Totals :                6839.03076  471.58113
```

```

=====
*** End of Report ***
  
```

**Supplementary Figure 259: HPLC spectrum of (±)-4s.**

Sample Name: ZY-09-194-5-EE

```

=====
Acq. Operator   : 系统                               Seq. Line :    6
Acq. Instrument : HPLC-1260                           Location  :   21
Injection Date  : 1/3/2022 10:36:44 AM                 Inj       :    1
                                                    Inj Volume: 3.000 µl
Different Inj Volume from Sample Entry! Actual Inj Volume : 0.800 µl
Acq. Method    : D:\zy\20211226\YH 2022-01-03 09-22-34\5IPA-15-1.0-1-2-220.M
Last changed   : 1/3/2022 10:03:22 AM by 系统
Analysis Method : E:\DATA\20220316\LC 2022-03-16 22-19-08\10IPA-10-1.0-1.MZWJ.M (Sequence
                Method)
Last changed   : 3/29/2022 9:49:15 AM by SYSTEM
                (modified after loading)
Additional Info : Peak(s) manually integrated
    
```

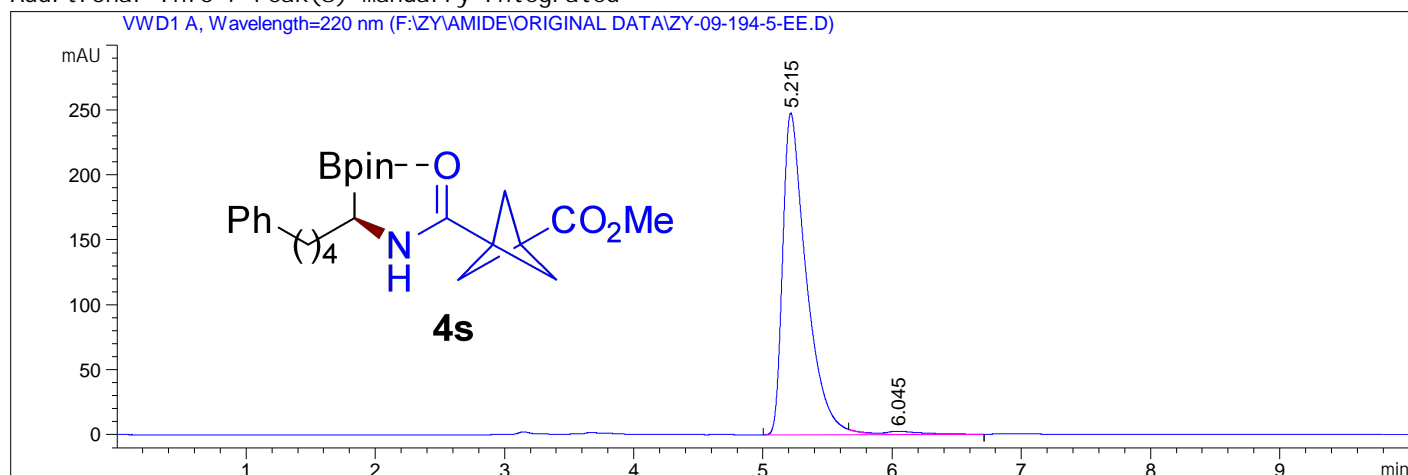

Area Percent Report

```

Sorted By      :      Signal
Multiplier     :      1.0000
Dilution      :      1.0000
Do not use Multiplier & Dilution Factor with ISTDs
    
```

Signal 1: VWD1 A, Wavelength=220 nm

| Peak # | RetTime [min] | Type | Width [min] | Area [mAU*s] | Height [mAU] | Area %  |
|--------|---------------|------|-------------|--------------|--------------|---------|
| 1      | 5.215         | BV R | 0.1852      | 3155.59595   | 247.50763    | 98.5435 |
| 2      | 6.045         | VB E | 0.2622      | 46.64185     | 2.39526      | 1.4565  |

Totals :                      3202.23780   249.90289

\*\*\* End of Report \*\*\*

Supplementary Figure 260: HPLC spectrum of 4s.

Sample Name: ZY-09-165-5-RAC

```

=====
Acq. Operator   : 系统                      Seq. Line :    3
Acq. Instrument : HPLC-1260                 Location  :   52
Injection Date  : 12/27/2021 9:31:34 AM    Inj       :    1
                                           Inj Volume: 3.000 µl
Different Inj Volume from Sample Entry! Actual Inj Volume : 1.000 µl
Acq. Method     : D:\zy\20211226\YH 2021-12-27 08-56-44\10IPA15_1-1-2-240.M
Last changed    : 12/27/2021 8:56:44 AM by 系统
Analysis Method : E:\DATA\20220316\LC 2022-03-16 22-19-08\10IPA-10-1.0-1.MZWJ.M (Sequence
Method)
Last changed    : 3/28/2022 11:11:46 PM by SYSTEM
                (modified after loading)
Additional Info : Peak(s) manually integrated
  
```

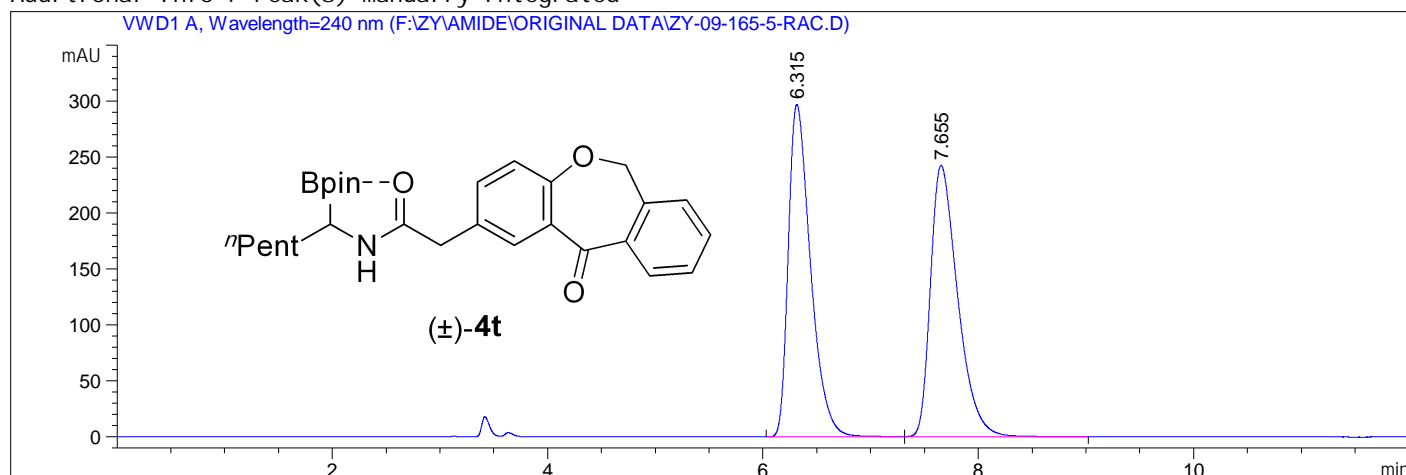

```

=====
Area Percent Report
=====
  
```

```

Sorted By      :      Signal
Multiplier     :      1.0000
Dilution       :      1.0000
Do not use Multiplier & Dilution Factor with ISTDs
  
```

Signal 1: VWD1 A, Wavelength=240 nm

| Peak # | RetTime [min] | Type | Width [min] | Area [mAU*s] | Height [mAU] | Area %  |
|--------|---------------|------|-------------|--------------|--------------|---------|
| 1      | 6.315         | BB   | 0.2177      | 4259.83740   | 297.23294    | 50.0306 |
| 2      | 7.655         | BB   | 0.2678      | 4254.63379   | 242.33784    | 49.9694 |

```
Totals :                8514.47119  539.57079
```

```

=====
*** End of Report ***
  
```

**Supplementary Figure 261: HPLC spectrum of (±)-4t.**

Sample Name: ZY-09-165-5-EE

```

=====
Acq. Operator   : 系统                               Seq. Line :    9
Acq. Instrument : HPLC-1260                           Location  :   51
Injection Date  : 12/27/2021 10:58:49 AM              Inj       :    1
                                                    Inj Volume: 3.000 µl
Different Inj Volume from Sample Entry! Actual Inj Volume : 1.300 µl
Acq. Method    : D:\zy\20211226\YH 2021-12-27 08-56-44\10IPA15_1-1-2-240.M
Last changed   : 12/27/2021 8:56:44 AM by 系统
Analysis Method : E:\DATA\20220316\LC 2022-03-16 22-19-08\10IPA-10-1.0-1.MZWJ.M (Sequence
                Method)
Last changed   : 3/28/2022 11:11:10 PM by SYSTEM
                (modified after loading)
=====
    
```

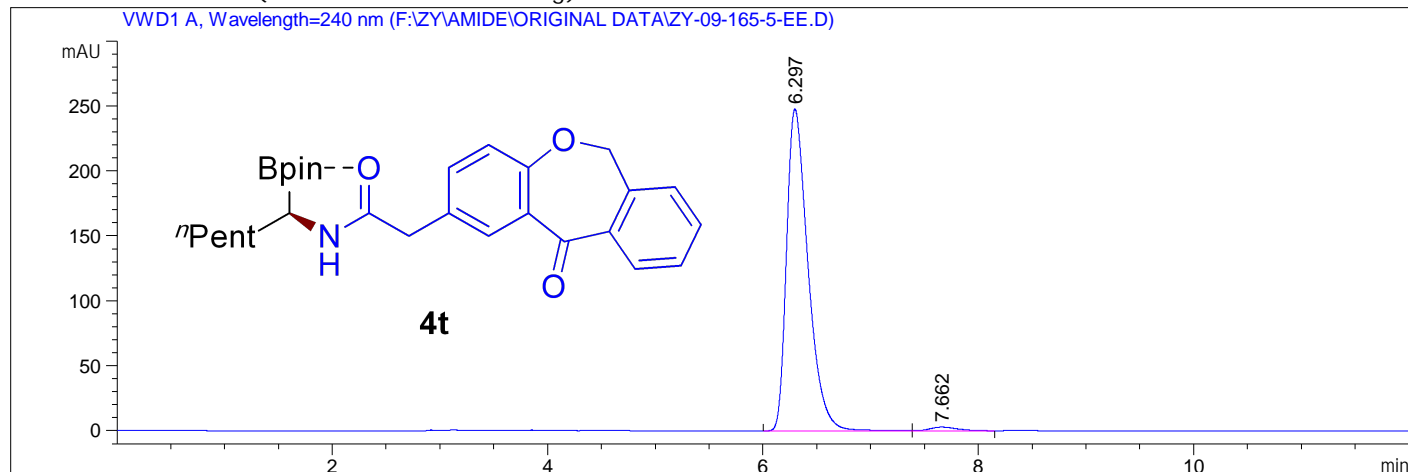

Area Percent Report

```

=====
Sorted By      :      Signal
Multiplier     :      1.0000
Dilution       :      1.0000
Do not use Multiplier & Dilution Factor with ISTDs
    
```

Signal 1: VWD1 A, Wavelength=240 nm

| Peak # | RetTime [min] | Type | Width [min] | Area [mAU*s] | Height [mAU] | Area %  |
|--------|---------------|------|-------------|--------------|--------------|---------|
| 1      | 6.297         | BV   | 0.2116      | 3430.65576   | 247.72098    | 98.5969 |
| 2      | 7.662         | VB   | 0.2450      | 48.82105     | 2.81994      | 1.4031  |

Totals : 3479.47681 250.54092

\*\*\* End of Report \*\*\*

Supplementary Figure 262: HPLC spectrum of 4t.

Sample Name: ZY-09-196-5-RAC

```

=====
Acq. Operator   : 系统                      Seq. Line :    7
Acq. Instrument : HPLC-1260                 Location  :   22
Injection Date  : 1/2/2022 7:10:31 PM      Inj       :    1
                                           Inj Volume: 3.000 µl
Different Inj Volume from Sample Entry! Actual Inj Volume : 0.600 µl
Acq. Method    : D:\zy\20211226\YH 2022-01-02 17-33-48\5I PA20_8-1-2-240.M
Last changed   : 1/2/2022 6:35:59 PM by 系统
Analysis Method : E:\DATA\20220316\LC 2022-03-16 22-19-08\10I PA-10-1.0-1.MZJ.M (Sequence
Method)
Last changed   : 3/29/2022 9:57:32 AM by SYSTEM
(modified after loading)
Additional Info : Peak(s) manually integrated
  
```

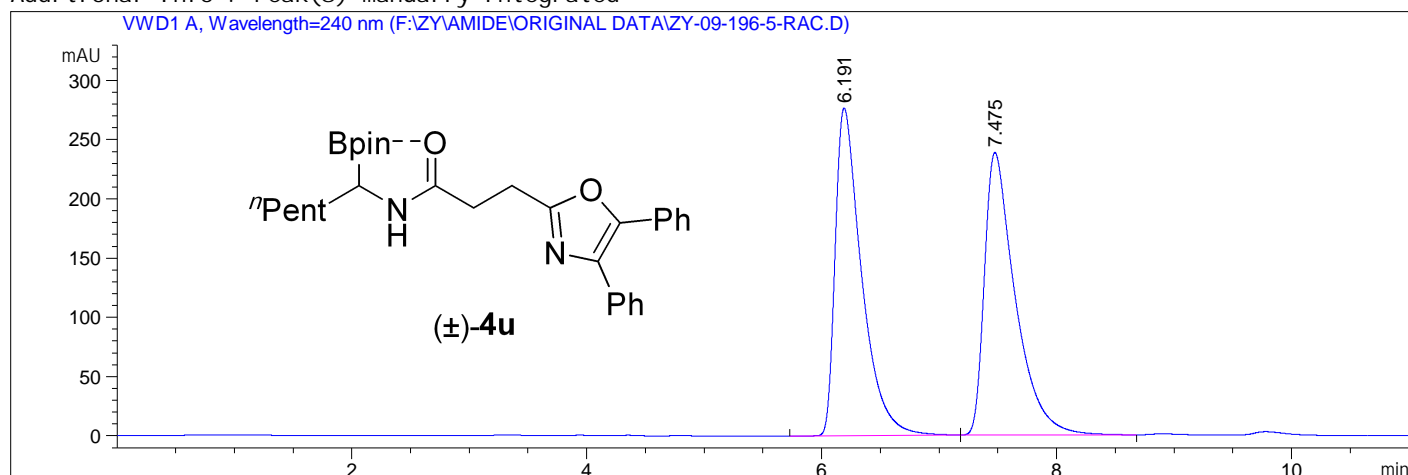

```

=====
                          Area Percent Report
=====
  
```

```

Sorted By      :      Signal
Multiplier     :      1.0000
Dilution      :      1.0000
Do not use Multiplier & Dilution Factor with ISTDs
  
```

Signal 1: VWD1 A, Wavelength=240 nm

| Peak # | RetTime [min] | Type | Width [min] | Area [mAU*s] | Height [mAU] | Area %  |
|--------|---------------|------|-------------|--------------|--------------|---------|
| 1      | 6.191         | BB   | 0.2315      | 4319.26270   | 276.83588    | 49.8534 |
| 2      | 7.475         | BB   | 0.2675      | 4344.66309   | 238.48940    | 50.1466 |

```
Totals :                      8663.92578  515.32527
```

```

=====
*** End of Report ***
  
```

**Supplementary Figure 263: HPLC spectrum of (±)-4u.**

Sample Name: ZY-09-196-5-EE

```

=====
Acq. Operator   : 系统                      Seq. Line   :    6
Acq. Instrument : HPLC-1260                 Location    :   21
Injection Date  : 1/2/2022 6:49:09 PM      Inj         :    1
                                           Inj Volume  : 3.000 µl
Different Inj Volume from Sample Entry! Actual Inj Volume : 0.800 µl
Acq. Method    : D:\zy\20211226\YH 2022-01-02 17-33-48\5I PA20_8-1-2-240.M
Last changed   : 1/2/2022 6:35:59 PM by 系统
Analysis Method : E:\DATA\20220316\LC 2022-03-16 22-19-08\10I PA-10-1.0-1.MZWJ.M (Sequence
                                           Method)
Last changed   : 3/29/2022 9:58:14 AM by SYSTEM
                                           (modified after loading)
Additional Info : Peak(s) manually integrated
    
```

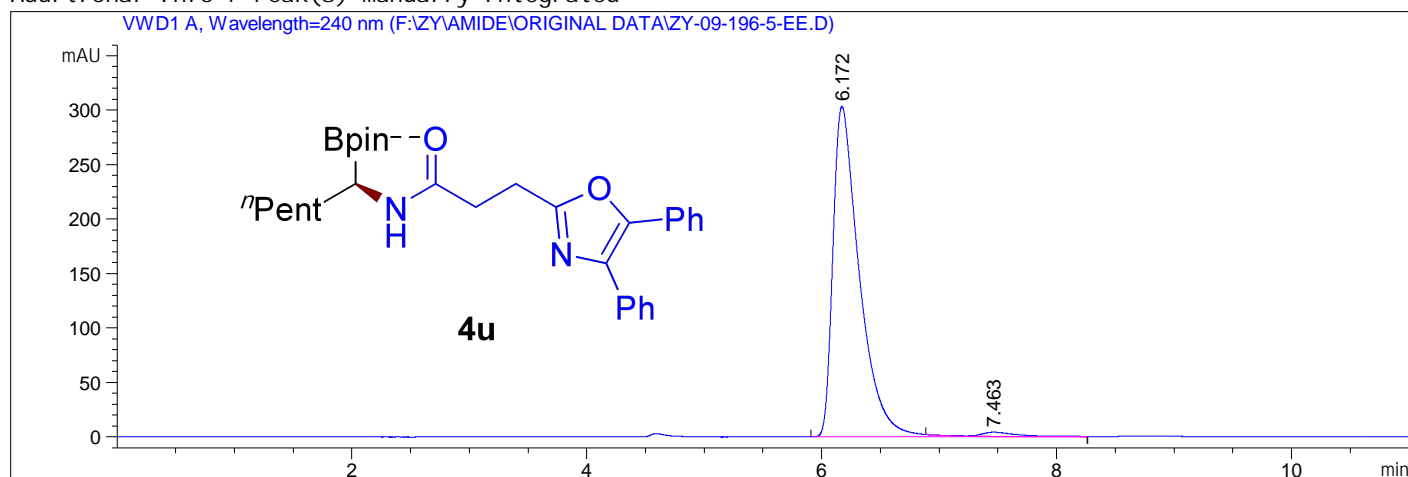

Area Percent Report

```

Sorted By      :      Signal
Multiplier     :      1.0000
Dilution      :      1.0000
Do not use Multiplier & Dilution Factor with ISTDs
    
```

Signal 1: VWD1 A, Wavelength=240 nm

| Peak # | RetTime [min] | Type | Width [min] | Area [mAU*s] | Height [mAU] | Area %  |
|--------|---------------|------|-------------|--------------|--------------|---------|
| 1      | 6.172         | BV R | 0.2321      | 4751.24121   | 303.63879    | 98.3375 |
| 2      | 7.463         | VB E | 0.2815      | 80.32556     | 3.88019      | 1.6625  |

Totals : 4831.56677 307.51899

\*\*\* End of Report \*\*\*

Supplementary Figure 264: HPLC spectrum of 4u.



Sample Name: ZY-09-196-1-RAC

```

=====
Acq. Operator   : 系统                      Seq. Line :    4
Acq. Instrument : HPLC-1260                 Location  :   62
Injection Date  : 12/31/2021 2:05:31 PM    Inj       :    1
                                           Inj Volume: 3.000 µl
Different Inj Volume from Sample Entry! Actual Inj Volume : 1.000 µl
Acq. Method     : D:\zy\20211226\YH 2021-12-31 13-15-03\10IPA15_1-1-2-240.M
Last changed    : 12/31/2021 1:15:03 PM by 系统
Analysis Method : E:\DATA\20220316\LC 2022-03-16 22-19-08\10IPA-10-1.0-1.MZWJ.M (Sequence
Method)
Last changed    : 3/29/2022 9:56:17 AM by SYSTEM
                (modified after loading)
Additional Info : Peak(s) manually integrated
  
```

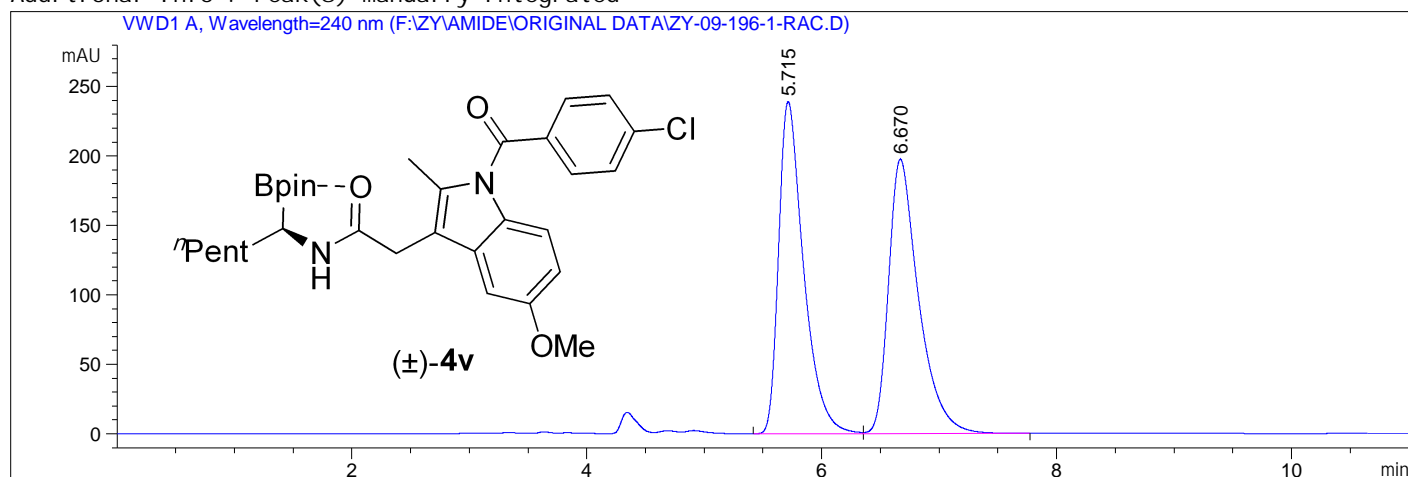

```

=====
                          Area Percent Report
=====
  
```

```

Sorted By      :      Signal
Multiplier     :      1.0000
Dilution       :      1.0000
Do not use Multiplier & Dilution Factor with ISTDs
  
```

Signal 1: VWD1 A, Wavelength=240 nm

| Peak # | RetTime [min] | Type | Width [min] | Area [mAU*s] | Height [mAU] | Area %  |
|--------|---------------|------|-------------|--------------|--------------|---------|
| 1      | 5.715         | BV   | 0.2207      | 3531.01099   | 239.23489    | 50.1104 |
| 2      | 6.670         | VB   | 0.2635      | 3515.44824   | 197.65958    | 49.8896 |

```
Totals :                      7046.45923  436.89447
```

```

=====
*** End of Report ***
  
```

**Supplementary Figure 265: HPLC spectrum of (±)-4v.**

Sample Name: ZY-09-196-1-EE

```

=====
Acq. Operator   : 系统                      Seq. Line   :    3
Acq. Instrument : HPLC-1260                  Location    :   61
Injection Date  : 12/31/2021 1:49:06 PM    Inj         :    1
                                           Inj Volume  : 3.000 µl
Different Inj Volume from Sample Entry! Actual Inj Volume : 1.000 µl
Acq. Method     : D:\zy\20211226\YH 2021-12-31 13-15-03\10IPA15_1-1-2-240.M
Last changed    : 12/31/2021 1:15:03 PM by 系统
Analysis Method : E:\DATA\20220316\LC 2022-03-16 22-19-08\10IPA-10-1.0-1.MZWJ.M (Sequence
                                           Method)
Last changed    : 3/29/2022 9:56:17 AM by SYSTEM
                                           (modified after loading)
=====
    
```

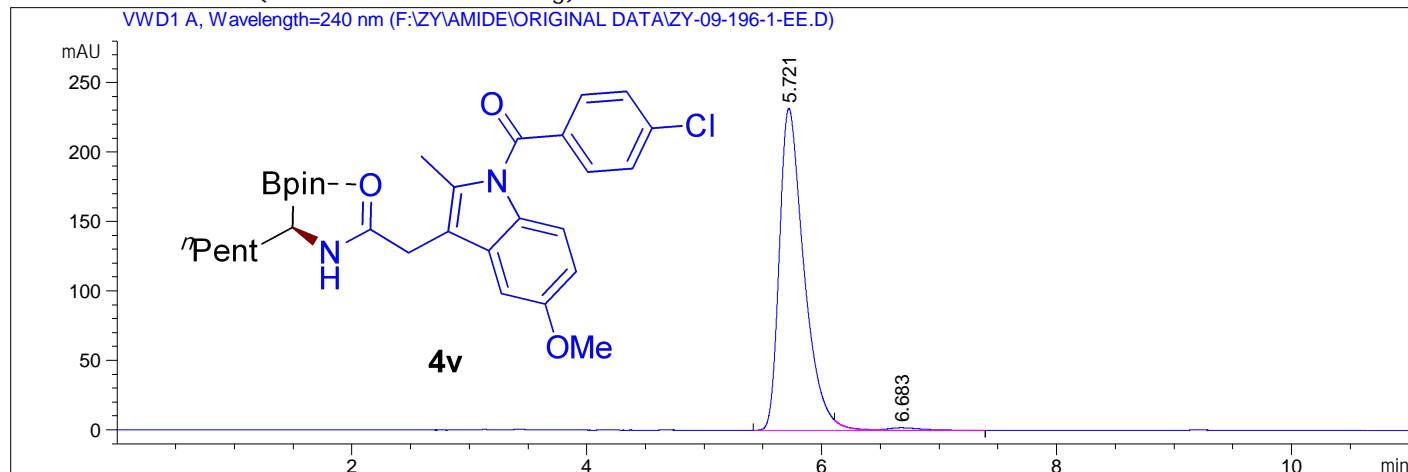

Area Percent Report

```

=====
Sorted By      :      Signal
Multiplier     :      1.0000
Dilution       :      1.0000
Do not use Multiplier & Dilution Factor with ISTDs
    
```

Signal 1: VWD1 A, Wavelength=240 nm

| Peak # | RetTime [min] | Type | Width [min] | Area [mAU*s] | Height [mAU] | Area %  |
|--------|---------------|------|-------------|--------------|--------------|---------|
| 1      | 5.721         | BV R | 0.2181      | 3378.15308   | 231.75551    | 98.8486 |
| 2      | 6.683         | VB E | 0.2638      | 39.34804     | 1.82285      | 1.1514  |

Totals : 3417.50111 233.57836

\*\*\* End of Report \*\*\*

Supplementary Figure 266: HPLC spectrum of 4v.



Sample Name: ZY-10-41-EE

```

=====
Acq. Operator   : 系统                               Seq. Line :    5
Acq. Instrument : HPLC-1260                          Location  :   82
Injection Date  : 3/2/2022 9:44:50 PM                Inj       :    1
                                                    Inj Volume: 3.000 µl
Different Inj Volume from Sample Entry! Actual Inj Volume : 1.500 µl
Acq. Method     : D:\zy\20220302\YH 2022-03-02 20-49-54\0.5IPA-15-1.0-1-2-220-SFT.M
Last changed    : 3/2/2022 9:25:44 PM by 系统
Analysis Method : E:\DATA\20220316\LC 2022-03-16 22-19-08\10IPA-10-1.0-1.MZWJ.M (Sequence
                  Method)
Last changed    : 3/29/2022 10:06:28 AM by SYSTEM
                  (modified after loading)
Additional Info : Peak(s) manually integrated
    
```

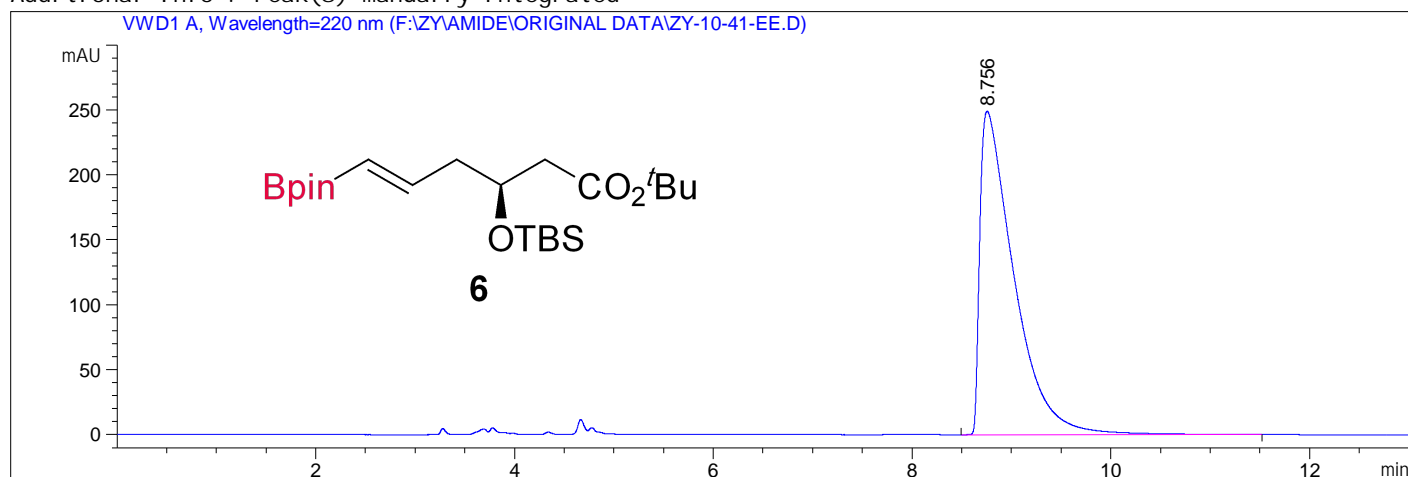

=====  
 Area Percent Report  
 =====

```

Sorted By      :      Signal
Multiplier     :      1.0000
Dilution       :      1.0000
Do not use Multiplier & Dilution Factor with ISTDs
    
```

Signal 1: VWD1 A, Wavelength=220 nm

| Peak # | RetTime [min] | Type | Width [min] | Area [mAU*s] | Height [mAU] | Area %   |
|--------|---------------|------|-------------|--------------|--------------|----------|
| 1      | 8.756         | BB   | 0.3500      | 5931.49121   | 248.95393    | 100.0000 |

Totals :                      5931.49121    248.95393

=====  
 \*\*\* End of Report \*\*\*

**Supplementary Figure 268: HPLC spectrum of 6.**

Sample Name: ZY-10-58-2-RAC

```

=====
Acq. Operator   : 系统                      Seq. Line :   18
Acq. Instrument : HPLC-1260                 Location  :    81
Injection Date  : 3/23/2022 7:12:12 PM      Inj       :    1
                                           Inj Volume: 3.000 µl
Different Inj Volume from Sample Entry! Actual Inj Volume : 1.500 µl
Acq. Method     : D:\zy\20220302\YH 2022-03-23 15-01-36\5I PA-15-1.0-1-6-240.M
Last changed    : 3/23/2022 6:43:30 PM by 系统
Analysis Method : C:\CHEM32\1\METHODS\0.2I PA-10-0.5-1-XYH-EQ.M
Last changed    : 3/29/2022 10:11:05 AM by SYSTEM
                                           (modified after loading)
    
```

Additional Info : Peak(s) manually integrated

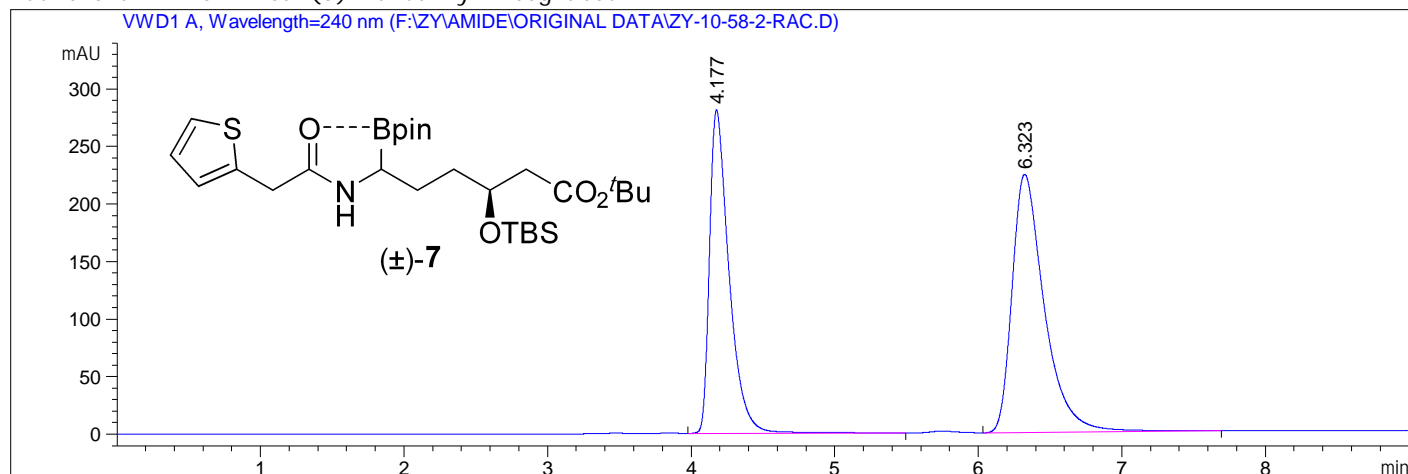

Area Percent Report

```

Sorted By      :      Signal
Multiplier     :      1.0000
Dilution       :      1.0000
Do not use Multiplier & Dilution Factor with ISTDs
    
```

Signal 1: VWD1 A, Wavelength=240 nm

| Peak # | RetTime [min] | Type | Width [min] | Area [mAU*s] | Height [mAU] | Area %  |
|--------|---------------|------|-------------|--------------|--------------|---------|
| 1      | 4.177         | BV R | 0.1429      | 2674.33887   | 281.27936    | 43.2703 |
| 2      | 6.323         | BB   | 0.2293      | 3506.19946   | 224.38475    | 56.7297 |

Totals : 6180.53833 505.66411

\*\*\* End of Report \*\*\*

Supplementary Figure 269: HPLC spectrum of (±)-7.

Sample Name: ZY-10-58-2

```

=====
Acq. Operator   : 系统                      Seq. Line :    7
Acq. Instrument : HPLC-1260                 Location  :   87
Injection Date  : 3/28/2022 11:27:04 AM     Inj       :    1
                                           Inj Volume: 3.000 µl
Different Inj Volume from Sample Entry! Actual Inj Volume : 4.500 µl
Acq. Method    : D:\zy\20220328\YH 2022-03-28 10-02-43\5I PA15_10-1-2-240.M
Last changed   : 3/28/2022 10:02:43 AM by 系统
Analysis Method: C:\CHEM32\1\METHODS\0.2I PA-10-0.5-1-XYH-EQ.M
Last changed   : 3/29/2022 10:10:25 AM by SYSTEM
                (modified after loading)
Additional Info : Peak(s) manually integrated
  
```

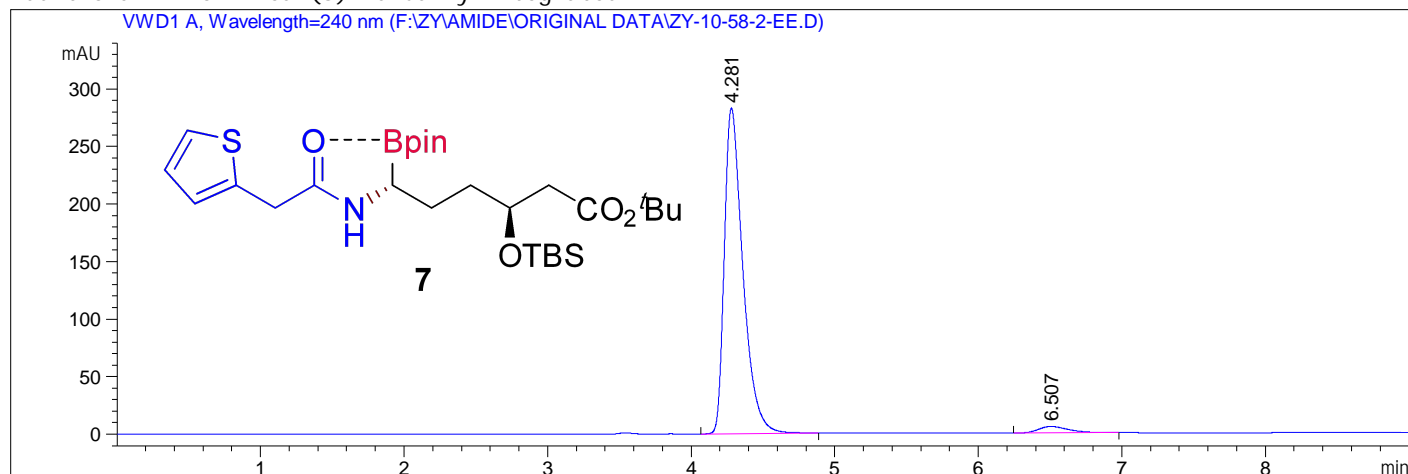

```

=====
Area Percent Report
=====
  
```

```

Sorted By      :      Signal
Multiplier     :      1.0000
Dilution      :      1.0000
Do not use Multiplier & Dilution Factor with ISTDs
  
```

Signal 1: VWD1 A, Wavelength=240 nm

| Peak # | RetTime [min] | Type | Width [min] | Area [mAU*s] | Height [mAU] | Area %  |
|--------|---------------|------|-------------|--------------|--------------|---------|
| 1      | 4.281         | BB   | 0.1348      | 2543.26392   | 283.05804    | 96.8887 |
| 2      | 6.507         | BB   | 0.2216      | 81.67083     | 5.60107      | 3.1113  |

```
Totals :                2624.93475  288.65911
```

```

=====
*** End of Report ***
  
```

**Supplementary Figure 270: HPLC spectrum of 7.**

### III. Supplementary References

1. Berk, S. C. & Buchwald, S. L. An air-stable catalyst system for the conversion of esters to alcohols. *J. Org. Chem.* **57**, 3751–3753 (1992).
2. Bhowmik, A., Mulay, S. V. & Fernandes, R. A. A step-economic synthesis of (*S*)-(-)-Juglomycin C and (*S*)-(-)-NHAB by Dötz benzannulation and convergent deprotections. *Asian J. Org. Chem.* **8**, 1534–1538 (2019).
3. Hecker, S. J., Reddy, K. R., Totrov, M., Hirst, G. C., Lomovskaya, O., Griffith, D. C., King, P., Tsivkovski, R., Sun, D., Sabet, M., Tarazi, Z., Clifton, M. C., Atkins, K., Raymond, A., Potts, K. T., Abendroth, J., Boyer, S. H., Loutit, J. S., Morgan, E. E., Durso, S. & Dudley, M. N. Discovery of a cyclic boronic acid  $\beta$ -lactamase inhibitor (RPX7009) with utility vs class a serine carbapenemases. *J. Med. Chem.* **58**, 3682–3692 (2015).
4. Shimizu, H., Igarashi, T., Miura, T. & Murakami, M. Rhodium-catalyzed reaction of 1-alkenylboronates with aldehydes leading to allylation products. *Angew. Chem. Int. Ed.* **50**, 11465–11469 (2011).
5. Yang, C., Gao, Y., Bai, S., Jiang, C. & Qi, X. Chemoselective cross-coupling of *gem*-borazirconocene alkanes with aryl halides. *J. Am. Chem. Soc.* **142**, 11506–11513 (2020).
6. Kontokosta, D., Mueller, D. S., Wang, H.-Y. & Anderson, L. L. Preparation of  $\alpha$ -imino aldehydes by [1,3]-rearrangements of O-alkenyl oximes. *Org. Lett.* **15**, 4830–4833 (2013).
7. Bera, S., Mao, R. & Hu, X. Enantioselective C(*sp*<sup>3</sup>)-C(*sp*<sup>3</sup>) cross-coupling of non-activated alkyl electrophiles via nickel hydride catalysis. *Nat. Chem.* **13**, 270–277 (2021).
8. Coombs, J. R., Zhang, L. & Morken, J. P. Enantiomerically enriched tris(boronates): readily accessible conjunctive reagents for asymmetric synthesis. *J. Am. Chem. Soc.* **136**, 16140–16143 (2014).
9. Fujita, M., Lee, H. J. & Okuyama, T. Stereochemical inversion in the vinylic substitution of boronic esters to give iodonium salts: participation of the internal

- oxy group. *Org. Lett.* **8**, 1399–1401 (2006).
10. Zhang, Y., Ma, J., Chen, J., Meng, L., Liang, Y. & Zhu, S. A relay catalysis strategy for enantioselective nickel-catalyzed migratory hydroarylation forming chiral  $\alpha$ -aryl alkylboronates. *Chem* **7**, 3171–3188 (2021).
  11. Bera, S. & Hu, X. Nickel-catalyzed regioselective hydroalkylation and hydroarylation of alkenyl boronic esters. *Angew. Chem. Int. Ed.* **58**, 13854–13859 (2019).
  12. Du, B., Ouyang, Y., Chen, Q. & Yu, W.-Y. Thioether-directed NiH-catalyzed remote  $\gamma$ -C( $sp^3$ )-H hydroamidation of alkenes by 1,4,2-dioxazol-5-ones. *J. Am. Chem. Soc.* **143**, 14962–14968 (2021).
  13. Lei, H. & Rovis, T. Ir-catalyzed intermolecular branch-selective allylic C–H amidation of unactivated terminal olefins. *J. Am. Chem. Soc.* **141**, 2268–2273 (2019).
  14. Wang, H., Jung, H., Song, F., Zhu, S., Bai, Z., Chen, D., He, G., Chang, S. & Chen, G. Nitrene-mediated intermolecular *N–N* coupling for efficient synthesis of hydrazides. *Nat. Chem.* **13**, 378–385 (2021).
  15. Jung, H. J., Park, S., Lee, H. S., Shin, H. G., Yoo, Y., Baral, E. R., Lee, J. H., Kwak, J. & Kim, J. G. Chemical upcycling of waste poly(bisphenol a carbonate) to 1,4,2-dioxazol-5-ones and one-pot C–H amidation. *ChemSusChem* **14**, 4301–4306 (2021).
